# Supplementary material for: Proteomic profiling analysis of postmenopausal osteoporosis and osteopenia identifies potential proteins associated with low bone mineral density
Source: PeerJ. 2020 Apr 14;8:e9009. doi: 10.7717/peerj.9009 (PMC7164430; doi:10.7717/peerj.9009)
Supplement: Supplemental Information 1 [file peerj-08-9009-s001.xlsx]

## Sheet: Sheet1
Raw data of the basic information of all the participants.
Cases	Age	Age at menopause	Duration of menopause	BMI	Vitamin (ng/mL)	ALP (U/L)	P1NP (ng/mL)	CTX (ng/mL)	BMD (g/cm2)	T score	Group
NC1	50	49	1	24.2297	18.47	100	89.05	0.504	1.043	0.7	Normal Control
NC2	54	48	6	23.6244	12.81	45	57.7	0.307	1.005	0.4	Normal Control
NC3	52	47	5	25.3277	14	75	41.7	0.377	1.085	0.3	Normal Control
NC4	59	50	9	25.5923	13.51	111	116.6	0.725	0.932	-0.3	Normal Control
NC5	52	50	2	23.2698	26.11	110	94.74	0.371	0.971	-0.4	Normal Control
NC6	51	48	3	21.7	14.94	121	60.09	0.313	0.903	-1	Normal Control
NC7	48	46	2	24.2	21.63	121	95.9	0.521	0.855	-1	Normal Control
NC8	51	49	2	24.8	18.19	74	94.85	0.519	0.86	-1	Normal Control
NC9	53	50	3	23.2	23.19	154	101.8	0.35	0.944	-0.9	Normal Control
NC10	53	52	1	32.3	21.61	86	79.17	0.299	1.084	0.3	Normal Control
NC11	58	52	6	20.7	11.94	50	31.42	0.305	1.024	-0.2	Normal Control
NC12	51	49	2	25.5	18.29	107	45.13	0.277	0.738	-0.8	Normal Control
NC13	58	42	16	22.4	22.25	103	60.62	0.435	0.723	-0.9	Normal Control
NC14	60	43	17	30.5	11.79	67	58.91	0.496	0.876	-1	Normal Control
NC15	53	46	7	23.8	20.77	112	126.5	0.82	0.874	-1	Normal Control
NC16	61	48	13	25.1	17.81	95	63.81	0.583	0.718	-1	Normal Control
NC17	61	50	11	26.8	20.97	138	93.73	0.386	0.912	-0.4	Normal Control
NC18	69	48	21	27.3	13.31	119	90.4	0.417	0.961	-0.3	Normal Control
ON1	51	47	4	27.9417	20.05	73	60.03	0.398	0.908	-1.3	Osteopenia
ON2	61	47	14	27.4534	23.69	126	121	0.43	0.873	-1.3	Osteopenia
ON3	59	46	13	22.2941	21.78	68	72.14	0.206	0.833	-1.7	Osteopenia
ON4	53	46	7	26.3735	25.72	105	97.76	0.491	0.833	-1.9	Osteopenia
ON5	50	48	2	25.1891	16.47	60	47.58	0.382	0.758	-2	Osteopenia
ON6	69	48	21	26.5066	23.06	126	63.54	0.343	0.748	-2	Osteopenia
ON7	52	46	6	23.95	14.41	138	99.27	0.666	0.812	-2.1	Osteopenia
ON8	54	48	6	23.5815	22.3	100	40.02	0.2	0.742	-2.1	Osteopenia
ON9	58	47	11	24.1708	13.18	81	34.21	0.386	0.812	-2.1	Osteopenia
ON10	52	48	4	28.4623	10.41	113	58.91	0.34	0.819	-2.1	Osteopenia
ON11	58	47	11	20.9927	17.14	121	109.7	0.679	0.801	-2.2	Osteopenia
ON12	58	46	12	24.9942	30.38	122	89.43	0.428	0.722	-2.3	Osteopenia
ON13	63	47	16	24.9002	20.9	111	46.46	0.354	0.787	-2.4	Osteopenia
ON14	56	42	14	26.4635	20.05	80	51.14	0.213	0.778	-2.4	Osteopenia
ON15	55	47	8	21.5433	14.88	103	62.05	0.335	0.904	-1.3	Osteopenia
ON16	52	49	3	24.7022	21.11	119	94.14	0.47	0.834	-2.2	Osteopenia
ON17	61	49	12	26.5468	7.86	78	40.52	0.459	0.741	-2.3	Osteopenia
ON18	59	50	9	18.686	19.53	227	89.76	0.652	0.9	-1.3	Osteopenia
OP1	55	42	13	23.7535	24.02	124	125.7	0.445	0.593	-4.1	Osteoporosis
OP2	62	46	16	21.4819	16.54	107	101.6	0.798	0.629	-4.1	Osteoporosis
OP3	64	46	18	22.1751	18.87	95	62.15	0.37	0.591	-4.1	Osteoporosis
OP4	60	45	15	23.0326	20.42	126	78.97	0.209	0.59	-4.2	Osteoporosis
OP5	70	48	22	18.5	19.23	136	90.83	0.562	0.564	-4.4	Osteoporosis
OP6	54	47	7	24.1098	19.11	88	91.5	0.478	0.56	-4.4	Osteoporosis
OP7	60	45	15	23.4082	15.17	125	153.8	0.574	0.598	-4.4	Osteoporosis
OP8	52	51	1	22.8462	39.32	133	78.19	0.536	1.55	-4.5	Osteoporosis
OP9	57	47	10	23.2929	17.68	115	62.78	0.387	0.585	-4.5	Osteoporosis
OP10	59	48	11	20.4817	20.96	68	28.18	0.344	0.554	-4.5	Osteoporosis
OP11	51	46	5	21.0889	19.45	130	90.15	0.379	0.555	-4.5	Osteoporosis
OP12	65	48	17	23.9984	30.05	126	74.56	0.434	0.541	-4.6	Osteoporosis
OP13	56	44	12	20.111	10.28	58	49.59	0.44	0.532	-4.7	Osteoporosis
OP14	60	47	13	22.9002	20.62	106	93.09	0.65	0.533	-4.7	Osteoporosis
OP15	50	48	2	21.7961	4.67	62	55.14	0.214	0.522	-4.8	Osteoporosis
OP16	52	47	5	20.6338	15.13	84	65.35	0.39	0.505	-4.9	Osteoporosis
OP17	61	49	12	19.9	16.81	144	213.2	0.883	0.534	-4.7	Osteoporosis
OP18	62	49	13	20.4818	16.64	146	122	0.715	0.511	-4.9	Osteoporosis
