# Supplementary material for: Proteomic profiling analysis of postmenopausal osteoporosis and osteopenia identifies potential proteins associated with low bone mineral density
Source: PeerJ. 2020 Apr 14;8:e9009. doi: 10.7717/peerj.9009 (PMC7164430; doi:10.7717/peerj.9009)
Supplement: Supplemental Information 2 — The red filled columes represent up-regulation DAPs, and green filled columes represent down-regulation DAPs [file peerj-08-9009-s002.xlsx]

## Sheet: ON versus NC
Protein quantification and differential analysis in samples between ON and NC groups
The red filled columes represent up-regulation DAPs, and green filled columes represent down-regulation DAPs
Accession	Description	Coverage	Unique Peptides	Peptides	PSMs	AAs	MW [kDa]	calc. pI	ON-1/REF	ON-2/REF	ON-3/REF	average ON	NC-1/REF	NC-2/REF	NC-3/REF	average NC	ON/NC	t test p value
P46109	Crk-like protein OS=Homo sapiens GN=CRKL PE=1 SV=1 - [CRKL_HUMAN]	7.59	2	2	2	303	33.7559	6.7417	1.27562	1.62162	0.988244	1.29516	0.537282	0.516327	0.442029	0.498546	2.59788	0.012671
P02656	Apolipoprotein C-III OS=Homo sapiens GN=APOC3 PE=1 SV=1 - [APOC3_HUMAN]	46.46	3	3	36	99	10.8455	5.41455	1.81853	1.13967	1.14775	1.36865	0.783596	0.687817	0.699005	0.723472	1.89178	0.0467482
K7ERI9	Apolipoprotein C-I (Fragment) OS=Homo sapiens GN=APOC1 PE=1 SV=1 - [K7ERI9_HUMAN]	35.06	4	4	35	77	8.64167	6.7124	1.58996	1.24282	1.26844	1.36707	0.811885	0.687961	0.717319	0.739055	1.84976	0.00595714
H0Y512	Adipocyte plasma membrane-associated protein (Fragment) OS=Homo sapiens GN=APMAP PE=1 SV=1 - [H0Y512_HUMAN]	1.71	1	1	1	409	45.3761	5.65576	1.45816	1.13396	1.0829	1.22501	0.770421	0.74878	0.636894	0.718698	1.70448	0.0152955
Q14554	Protein disulfide-isomerase A5 OS=Homo sapiens GN=PDIA5 PE=1 SV=1 - [PDIA5_HUMAN]	4.24	2	2	2	519	59.5561	7.91357	0.940109	1.06734	1.28549	1.09765	0.554343	0.837367	0.69898	0.696897	1.57505	0.0366606
U3KQT1	S-formylglutathione hydrolase (Fragment) OS=Homo sapiens GN=ESD PE=1 SV=1 - [U3KQT1_HUMAN]	5.83	1	1	1	120	13.1007	8.68994	1.15407	1.20161	1.0059	1.12053	0.48409	0.837268	0.818275	0.713211	1.5711	0.0342227
K7ESI1	DNA repair protein RAD51 homolog 4 (Fragment) OS=Homo sapiens GN=RAD51D PE=4 SV=1 - [K7ESI1_HUMAN]	24.42	1	1	1	86	9.13257	7.07861	1.31203	1.09069	1.18396	1.19556	0.907733	0.950255	0.669071	0.842353	1.41931	0.0312228
H3BMF9	Semaphorin-7A (Fragment) OS=Homo sapiens GN=SEMA7A PE=1 SV=1 - [H3BMF9_HUMAN]	16.25	1	1	1	80	9.57572	6.04932	1.34078	1.06761	1.11924	1.17588	0.890165	0.892021	0.782925	0.855037	1.37523	0.024511
B2R932	cDNA, FLJ94187, highly similar to Homo sapiens CD99 antigen (CD99), mRNA OS=Homo sapiens PE=2 SV=1 - [B2R932_HUMAN]	7.57	1	1	1	185	18.9354	4.81787	1.02739	1.21387	1.0511	1.09745	0.780091	0.763135	0.861749	0.801658	1.36898	0.0109992
Q07960	Rho GTPase-activating protein 1 OS=Homo sapiens GN=ARHGAP1 PE=1 SV=1 - [RHG01_HUMAN]	12.98	4	4	5	439	50.4042	6.29053	1.11379	1.0485	1.18558	1.11596	0.693958	0.996483	0.818864	0.836435	1.33418	0.0439846
B4DE30	cDNA FLJ51711, highly similar to T-complex protein 1 subunit epsilon OS=Homo sapiens PE=2 SV=1 - [B4DE30_HUMAN]	1.72	1	1	1	466	51.5117	5.52881	0.957078	1.10784	1.15314	1.07268	0.685823	0.854407	0.897697	0.812642	1.32	0.0413266
K7ELP0	Tropomyosin alpha-4 chain (Fragment) OS=Homo sapiens GN=TPM4 PE=1 SV=1 - [K7ELP0_HUMAN]	62.32	1	5	6	69	8.01803	5.0083	1.07993	1.05748	1.17263	1.10335	0.683436	0.942514	0.902254	0.842735	1.30925	0.0413132
A0A140TA77	Receptor-type tyrosine-protein phosphatase C (Fragment) OS=Homo sapiens GN=PTPRC PE=1 SV=1 - [A0A140TA77_HUMAN]	2.41	1	1	1	457	51.1488	6.59521	1.18399	1.11708	1.10817	1.13641	0.973301	0.888778	0.786512	0.882863	1.28719	0.0127195
A0A024R592	Glucosidase, alpha neutral AB, isoform CRA_b OS=Homo sapiens GN=GANAB PE=3 SV=1 - [A0A024R592_HUMAN]	6.38	5	5	5	847	96.1289	5.8335	1.05099	1.22508	1.07684	1.11763	0.778699	0.921681	0.939844	0.880075	1.26993	0.0331487
H0YDG0	Puromycin-sensitive aminopeptidase (Fragment) OS=Homo sapiens GN=NPEPPS PE=1 SV=1 - [H0YDG0_HUMAN]	13.02	2	2	2	169	19.04	7.44482	1.06477	1.19319	1.0099	1.08929	0.830093	0.913051	0.94308	0.895408	1.21653	0.0387416
P28066	Proteasome subunit alpha type-5 OS=Homo sapiens GN=PSMA5 PE=1 SV=3 - [PSA5_HUMAN]	13.28	4	4	5	241	26.3942	4.79248	1.05356	1.05714	1.13186	1.08085	0.805039	0.890992	0.99066	0.895564	1.2069	0.0355428
P25787	Proteasome subunit alpha type-2 OS=Homo sapiens GN=PSMA2 PE=1 SV=2 - [PSA2_HUMAN]	11.11	2	2	3	234	25.8823	7.43018	1.06266	1.0645	1.09326	1.07347	0.837671	0.962956	0.871491	0.890706	1.20519	0.00916172
W6MEN4	Beta-1,4-galactosyltransferase 1 OS=Homo sapiens GN=B4GALT1 PE=2 SV=1 - [W6MEN4_HUMAN]	3.65	1	1	1	219	23.3602	8.99756	0.890453	0.919903	0.889972	0.90011	1.10305	1.06582	1.07237	1.08041	0.833117	0.000285835
A0A024R035	Complement component 9, isoform CRA_a OS=Homo sapiens GN=C9 PE=4 SV=1 - [A0A024R035_HUMAN]	50.27	27	27	357	559	63.1627	5.51611	0.898821	0.946503	0.882736	0.909353	1.15007	0.970495	1.17768	1.09942	0.827124	0.0484741
D6RIU4	Vesicular integral-membrane protein VIP36 (Fragment) OS=Homo sapiens GN=LMAN2 PE=1 SV=8 - [D6RIU4_HUMAN]	6.28	1	1	1	191	21.8466	6.52197	0.907702	0.965047	0.887674	0.920141	1.17081	1.03134	1.1469	1.11635	0.824241	0.0159715
B7ZKJ8	ITIH4 protein OS=Homo sapiens GN=ITIH4 PE=1 SV=1 - [B7ZKJ8_HUMAN]	56.68	1	44	1316	935	103.816	6.88818	0.868859	0.892257	0.944478	0.901865	1.11972	1.10774	1.08023	1.10256	0.81797	0.00135148
P24592	Insulin-like growth factor-binding protein 6 OS=Homo sapiens GN=IGFBP6 PE=1 SV=1 - [IBP6_HUMAN]	12.08	3	3	9	240	25.3062	7.81104	0.94143	0.975783	0.874015	0.930409	1.25547	1.03238	1.14134	1.14307	0.81396	0.0401387
P08637	Low affinity immunoglobulin gamma Fc region receptor III-A OS=Homo sapiens GN=FCGR3A PE=1 SV=2 - [FCG3A_HUMAN]	19.29	2	6	20	254	29.0707	8.07471	0.934002	0.812077	0.893382	0.87982	1.16797	1.04378	1.03301	1.08159	0.813454	0.0229778
B4DT06	Xylosyltransferase 2 OS=Homo sapiens GN=XYLT2 PE=1 SV=1 - [B4DT06_HUMAN]	2.07	1	1	1	676	75.4655	9.02686	0.891853	0.901476	0.959544	0.917625	1.17219	1.0257	1.1964	1.13143	0.811031	0.0203463
P36955	Pigment epithelium-derived factor OS=Homo sapiens GN=SERPINF1 PE=1 SV=4 - [PEDF_HUMAN]	52.63	20	20	221	418	46.2833	6.37939	0.904258	0.843498	0.944132	0.897296	1.22632	1.02083	1.0949	1.11402	0.80546	0.0315905
Q16627	C-C motif chemokine 14 OS=Homo sapiens GN=CCL14 PE=1 SV=1 - [CCL14_HUMAN]	19.35	2	2	4	93	10.6713	8.71924	0.889002	1.01968	0.892096	0.933593	1.1035	1.11624	1.27566	1.16514	0.801274	0.0299152
A3KFI2	Neuroblastoma suppressor of tumorigenicity 1 (Fragment) OS=Homo sapiens GN=NBL1 PE=1 SV=1 - [A3KFI2_HUMAN]	12.84	2	2	2	109	11.8488	5.73193	0.88419	0.96507	0.918012	0.922424	1.25189	1.05092	1.16792	1.15691	0.797316	0.020247
P41222	Prostaglandin-H2 D-isomerase OS=Homo sapiens GN=PTGDS PE=1 SV=1 - [PTGDS_HUMAN]	24.74	4	4	17	190	21.0153	7.79639	0.844014	0.972043	0.909783	0.908614	1.20297	1.04024	1.18222	1.14181	0.795766	0.0209109
Q14427	GM2-activator protein (Fragment) OS=Homo sapiens PE=2 SV=1 - [Q14427_HUMAN]	14.56	2	2	2	103	11.1297	4.75439	0.905259	0.87061	0.914424	0.896764	1.25245	0.988423	1.1463	1.12906	0.79426	0.0405925
D6R934	Complement C1q subcomponent subunit B OS=Homo sapiens GN=C1QB PE=1 SV=1 - [D6R934_HUMAN]	30.68	7	7	69	251	26.4424	8.63135	1.04692	0.829477	0.915975	0.93079	1.17184	1.33308	1.12747	1.2108	0.76874	0.0344855
P61626	Lysozyme C OS=Homo sapiens GN=LYZ PE=1 SV=1 - [LYSC_HUMAN]	28.38	5	5	23	148	16.5263	9.15869	1.00633	0.99783	0.843954	0.949373	1.21042	1.3651	1.17166	1.24906	0.76007	0.0193846
A0A087WZR4	Low affinity immunoglobulin gamma Fc region receptor III-B OS=Homo sapiens GN=FCGR3B PE=1 SV=1 - [A0A087WZR4_HUMAN]	24.54	2	6	19	216	24.4062	6.7124	0.895627	1.03519	0.82942	0.920079	1.17782	1.29903	1.29024	1.2557	0.732724	0.00963328
Q8TCF0	LBP protein OS=Homo sapiens GN=LBP PE=2 SV=1 - [Q8TCF0_HUMAN]	28.93	10	10	32	477	52.9007	6.75635	0.816632	0.927441	0.795028	0.846367	1.27805	1.06483	1.17248	1.17179	0.722289	0.0116942
H0YLF3	Beta-2-microglobulin (Fragment) OS=Homo sapiens GN=B2M PE=1 SV=1 - [H0YLF3_HUMAN]	28.17	2	2	16	71	8.49315	5.14795	0.836095	0.93737	0.846036	0.873167	1.26093	1.28151	1.15084	1.23109	0.709261	0.00230298
Q658S4	Uncharacterized protein DKFZp666N164 (Fragment) OS=Homo sapiens GN=DKFZp666N164 PE=2 SV=1 - [Q658S4_HUMAN]	6.56	1	1	1	122	13.4158	8.88037	0.840419	1.09056	0.79945	0.910143	1.32652	1.16385	1.5588	1.34972	0.674318	0.0397794
B7Z539	cDNA FLJ56954, highly similar to Inter-alpha-trypsin inhibitor heavy chain H1 OS=Homo sapiens PE=2 SV=1 - [B7Z539_HUMAN]	49.61	2	27	1053	645	72.074	7.6792	0.830986	0.740148	0.738651	0.769928	1.10299	1.27738	1.39437	1.25824	0.611907	0.00559424
P0C0L4	Complement C4-A OS=Homo sapiens GN=C4A PE=1 SV=2 - [CO4A_HUMAN]	64.11	1	88	2810	1744	192.664	7.07861	0.667157	1.05145	0.592967	0.770525	1.30742	1.81235	1.43294	1.51757	0.507736	0.0228967
P05546	Heparin cofactor 2 OS=Homo sapiens GN=SERPIND1 PE=1 SV=3 - [HEP2_HUMAN]	55.71	24	24	348	499	57.0342	6.90283	0.957074	0.95765	0.951143	0.955289	1.01289	1.02087	1.08012	1.03796	0.920354	0.0178407
Q6LAM1	Heavy chain of factor I (Fragment) OS=Homo sapiens PE=2 SV=1 - [Q6LAM1_HUMAN]	57.32	1	19	308	321	35.8589	7.59131	0.929298	0.879336	0.923938	0.910857	1.15649	1.00721	1.04265	1.06878	0.85224	0.0297028
B7Z550	Complement component 8, beta polypeptide, isoform CRA_b OS=Homo sapiens GN=C8B PE=2 SV=1 - [B7Z550_HUMAN]	67.86	31	31	301	529	60.101	7.76709	0.955082	0.876037	0.884747	0.905289	1.08234	0.990528	1.01896	1.03061	0.878401	0.0274038
P07360	Complement component C8 gamma chain OS=Homo sapiens GN=C8G PE=1 SV=3 - [CO8G_HUMAN]	79.7	12	12	117	202	22.2635	8.30908	0.967778	0.94075	0.859598	0.922708	1.11523	0.997631	1.05285	1.05524	0.874408	0.0478868
Q9UGM5	Fetuin-B OS=Homo sapiens GN=FETUB PE=1 SV=2 - [FETUB_HUMAN]	37.96	14	14	80	382	42.028	6.82959	0.971882	0.881104	0.953909	0.935632	1.04753	1.03389	1.06558	1.049	0.891927	0.0178666
P01034	Cystatin-C OS=Homo sapiens GN=CST3 PE=1 SV=1 - [CYTC_HUMAN]	34.25	4	4	45	146	15.7891	8.74854	0.877619	0.89433	0.980575	0.917508	1.1161	1.03505	1.067	1.07272	0.855312	0.0173477
Q9NZP8	Complement C1r subcomponent-like protein OS=Homo sapiens GN=C1RL PE=1 SV=2 - [C1RL_HUMAN]	29.77	2	13	79	487	53.4643	7.1958	0.897542	0.86421	0.969002	0.910251	1.13258	1.08668	1.00796	1.07574	0.846163	0.0256761
Q53GN4	WD repeat domain 1, isoform CRA_a (Fragment) OS=Homo sapiens GN=WDR1 PE=2 SV=1 - [Q53GN4_HUMAN]	30.53	1	20	62	606	66.1379	6.65381	1.09254	1.00711	1.09564	1.06509	0.93892	0.960579	0.955762	0.951754	1.11909	0.0189257
P49908	Selenoprotein P OS=Homo sapiens GN=SELENOP PE=1 SV=3 - [SEPP1_HUMAN]	13.91	6	6	48	381	43.1563	7.86963	0.945535	0.989999	0.990088	0.975207	1.14803	1.05181	1.04592	1.08192	0.901367	0.0422948
P40197	Platelet glycoprotein V OS=Homo sapiens GN=GP5 PE=1 SV=1 - [GPV_HUMAN]	10	5	5	8	560	60.9207	9.62744	1.01674	1.09523	0.985377	1.03245	0.867115	0.942998	0.921053	0.910389	1.13407	0.0371103
A0A1B0GW44	Cathepsin D OS=Homo sapiens GN=CTSD PE=1 SV=1 - [A0A1B0GW44_HUMAN]	22.22	8	8	13	405	43.6602	6.53662	0.866877	0.933309	0.880673	0.89362	1.04385	1.02391	1.03957	1.03578	0.862754	0.00254179
A0A087X0T8	Cell adhesion molecule 1 OS=Homo sapiens GN=CADM1 PE=1 SV=1 - [A0A087X0T8_HUMAN]	14.16	3	3	3	346	38.7555	5.43994	0.980126	0.993274	1.00958	0.994325	1.09665	1.03973	1.06689	1.06776	0.931227	0.0165879
Q8IXL6	Extracellular serine/threonine protein kinase FAM20C OS=Homo sapiens GN=FAM20C PE=1 SV=2 - [FA20C_HUMAN]	6.51	3	3	5	584	66.1925	7.73779	0.952005	1.02118	0.959133	0.97744	1.03492	1.05942	1.04188	1.04541	0.934986	0.0425376
P48637	Glutathione synthetase OS=Homo sapiens GN=GSS PE=1 SV=1 - [GSHB_HUMAN]	13.71	8	8	10	474	52.3523	5.92236	1.02657	1.03454	1.04769	1.03626	0.892324	0.996153	0.915029	0.934502	1.1089	0.0338858
G3V2V8	Epididymal secretory protein E1 (Fragment) OS=Homo sapiens GN=NPC2 PE=1 SV=1 - [G3V2V8_HUMAN]	26.23	3	3	4	122	13.0697	8.33838	0.934183	0.938806	0.920627	0.931205	1.09391	0.977636	1.0886	1.05338	0.884015	0.0332019
B3KXC5	cDNA FLJ45164 fis, clone BRAWH3044151, highly similar to Homo sapiens ADAMTS-like 2 (ADAMTSL2), mRNA OS=Homo sapiens PE=2 SV=1 - [B3KXC5_HUMAN]	5.26	2	2	3	380	42.4513	7.07861	0.893377	0.975295	0.848231	0.905634	1.09726	1.0249	1.10338	1.07518	0.842308	0.0195362
B4DNR3	cDNA FLJ52710, highly similar to Abhydrolase domain-containing protein 14B OS=Homo sapiens PE=2 SV=1 - [B4DNR3_HUMAN]	7.03	1	1	1	185	19.7842	6.40479	1.02196	1.06278	1.07414	1.05296	0.823397	0.852547	0.981572	0.885839	1.18866	0.0308088
D6R9R8	Interleukin-6 receptor subunit alpha (Fragment) OS=Homo sapiens GN=IL6R PE=1 SV=8 - [D6R9R8_HUMAN]	4.71	1	1	1	170	17.8883	8.76318	0.911986	0.90928	0.951574	0.92428	1.05867	0.995237	0.996686	1.01686	0.908951	0.0207167
A0A024R2W4	Dystroglycan 1 (Dystrophin-associated glycoprotein 1), isoform CRA_a OS=Homo sapiens GN=DAG1 PE=4 SV=1 - [A0A024R2W4_HUMAN]	3.69	3	3	3	895	97.4797	8.55811	1.00127	0.906847	0.89784	0.93532	1.12578	1.05757	1.08128	1.08821	0.859502	0.0167382
C9JMK5	Phosphoinositide-3-kinase-interacting protein 1 (Fragment) OS=Homo sapiens GN=PIK3IP1 PE=1 SV=8 - [C9JMK5_HUMAN]	7.64	1	1	1	144	15.9927	7.89893	0.977712	0.966906	0.88867	0.944429	1.04591	1.00522	1.05192	1.03435	0.913067	0.0468445
Q71UM7	Beta-subunit signal transducing proteins GS/GI (Fragment) OS=Homo sapiens PE=2 SV=1 - [Q71UM7_HUMAN]	7.87	1	1	1	127	13.8604	4.90674	1.02047	0.992512	1.07303	1.02867	0.869702	0.927667	0.943838	0.913736	1.12579	0.0243584
C9JXF9	Insulin-like growth factor-binding protein 1 OS=Homo sapiens GN=IGFBP1 PE=1 SV=1 - [C9JXF9_HUMAN]	2.72	1	1	1	257	27.6533	5.2876	0.997337	1.05795	0.92268	0.992656	1.11831	1.1134	1.08644	1.10605	0.897479	0.0483214
C0JYY2	Apolipoprotein B (Including Ag(X) antigen) OS=Homo sapiens GN=APOB PE=4 SV=1 - [C0JYY2_HUMAN]	66.4	134	278	4985	4563	515.236	7.04932	1.10468	0.945556	1.06913	1.03979	1.17836	0.894206	0.949837	1.00747	1.03208	0.761397
P01023	Alpha-2-macroglobulin OS=Homo sapiens GN=A2M PE=1 SV=3 - [A2MG_HUMAN]	61.74	61	72	3010	1474	163.188	6.45557	1.57873	1.55186	0.413473	1.18135	1.51846	1.32856	1.42704	1.42468	0.829203	0.5645
A0A0G2JPR0	Complement C4-A OS=Homo sapiens GN=C4A PE=1 SV=1 - [A0A0G2JPR0_HUMAN]	64.11	1	88	2831	1744	192.754	7.03467	0.568988	0.608645	1.58235	0.919996	2.06653	0.63531	0.903338	1.20173	0.765561	0.635616
P0C0L5	Complement C4-B OS=Homo sapiens GN=C4B PE=1 SV=2 - [CO4B_HUMAN]	64.11	1	88	2843	1744	192.631	7.26904	1.14003	1.32759	1.0543	1.17397	1.30741	1.03305	1.0447	1.12839	1.0404	0.724547
A0A024R462	Fibronectin 1, isoform CRA_n OS=Homo sapiens GN=FN1 PE=4 SV=1 - [A0A024R462_HUMAN]	57.32	57	96	1972	2355	259.049	5.73193	0.917686	1.07181	1.02166	1.00372	1.16743	0.854402	0.996138	1.00599	0.997742	0.983175
P08603	Complement factor H OS=Homo sapiens GN=CFH PE=1 SV=4 - [CFAH_HUMAN]	59.79	3	67	1836	1231	139.005	6.60986	0.940884	0.926086	0.930976	0.932649	1.1255	0.913414	1.00719	1.01537	0.918532	0.249912
A8K5T0	cDNA FLJ75416, highly similar to Homo sapiens complement factor H (CFH), mRNA OS=Homo sapiens PE=2 SV=1 - [A8K5T0_HUMAN]	57.92	1	65	1804	1231	138.859	6.7124	1.14849	0.605855	0.946333	0.900226	0.744405	1.56138	1.02593	1.11057	0.810596	0.504518
P01008	Antithrombin-III OS=Homo sapiens GN=SERPINC1 PE=1 SV=1 - [ANT3_HUMAN]	66.81	32	32	1214	464	52.5689	6.7124	1.03858	0.917676	1.01154	0.989266	1.06732	0.94673	0.969519	0.994523	0.994714	0.924427
P02774	Vitamin D-binding protein OS=Homo sapiens GN=GC PE=1 SV=1 - [VTDB_HUMAN]	84.39	32	42	1801	474	52.929	5.5415	1.0054	0.888271	1.00263	0.965433	1.12317	0.949594	0.956794	1.00985	0.956013	0.552492
Q59HB3	Apolipoprotein B variant (Fragment) OS=Homo sapiens PE=2 SV=1 - [Q59HB3_HUMAN]	61.98	1	90	1659	1615	183.465	6.80029	1.19128	0.977559	0.936214	1.03502	1.3058	0.873861	0.921627	1.03376	1.00121	0.994036
P02790	Hemopexin OS=Homo sapiens GN=HPX PE=1 SV=2 - [HEMO_HUMAN]	67.53	30	30	1529	462	51.6433	7.02002	0.988323	0.892328	0.947793	0.942815	1.14187	1.02477	0.986986	1.05121	0.896886	0.116594
P00450	Ceruloplasmin OS=Homo sapiens GN=CP PE=1 SV=1 - [CERU_HUMAN]	59.44	50	55	1915	1065	122.128	5.71924	0.984977	0.965646	1.00027	0.983632	1.06831	0.992	1.06036	1.04022	0.945598	0.0969903
P01011	Alpha-1-antichymotrypsin OS=Homo sapiens GN=SERPINA3 PE=1 SV=2 - [AACT_HUMAN]	48.7	19	19	1201	423	47.6205	5.51611	0.990784	0.936161	0.936842	0.954596	1.05261	0.941223	1.18664	1.06016	0.900427	0.222818
B2RMS9	Inter-alpha (Globulin) inhibitor H4 (Plasma Kallikrein-sensitive glycoprotein) OS=Homo sapiens GN=ITIH4 PE=2 SV=1 - [B2RMS9_HUMAN]	56.45	1	44	1317	930	103.298	6.97607	0.752169	1.11994	0.892656	0.921589	1.31995	1.00506	1.21324	1.17942	0.781394	0.142581
B7Z544	cDNA FLJ51742, highly similar to Inter-alpha-trypsin inhibitor heavy chain H4 OS=Homo sapiens PE=2 SV=1 - [B7Z544_HUMAN]	54.95	1	40	1258	888	98.2863	6.59521	0.876531	0.993359	0.974363	0.948084	1.05998	1.00127	0.993074	1.01811	0.931222	0.169844
A2RTY6	Inter-alpha (Globulin) inhibitor H2 OS=Homo sapiens GN=ITIH2 PE=2 SV=1 - [A2RTY6_HUMAN]	48.1	38	38	1290	946	106.37	6.85889	1.04162	0.906364	0.935173	0.961053	1.10984	0.925056	0.938436	0.991109	0.969675	0.699056
B4E1Z4	cDNA FLJ55673, highly similar to Complement factor B (EC 3.4.21.47) OS=Homo sapiens PE=1 SV=1 - [B4E1Z4_HUMAN]	60.43	20	69	1343	1266	140.853	7.18115	0.96381	0.895694	1.01537	0.958291	1.02858	1.09062	1.00307	1.04076	0.920762	0.129712
B4E1C2	Kininogen 1, isoform CRA_b OS=Homo sapiens GN=KNG1 PE=2 SV=1 - [B4E1C2_HUMAN]	58.23	10	40	1120	644	71.8701	6.81494	0.757527	1.06103	1.01407	0.944209	1.07452	1.04635	1.01031	1.04372	0.904654	0.35906
B4DPP8	cDNA FLJ53075, highly similar to Kininogen-1 OS=Homo sapiens PE=2 SV=1 - [B4DPP8_HUMAN]	74.7	3	33	993	415	46.4668	6.43018	0.572956	1.11288	1.03257	0.906136	0.984218	1.15749	1.08722	1.07631	0.841892	0.387278
B4DU16	cDNA FLJ54550, highly similar to Homo sapiens fibronectin 1 (FN1), transcript variant 6, mRNA OS=Homo sapiens PE=2 SV=1 - [B4DU16_HUMAN]	61.07	1	38	890	894	98.0948	6.23975	1.38084	1.36147	0.85535	1.19922	1.64188	1.09893	1.17334	1.30472	0.919143	0.685157
P00747	Plasminogen OS=Homo sapiens GN=PLG PE=1 SV=2 - [PLMN_HUMAN]	70.74	52	52	1126	810	90.5102	7.23975	0.990663	0.886408	0.995505	0.957525	1.07217	0.997841	0.988707	1.01957	0.939145	0.234174
P02765	Alpha-2-HS-glycoprotein OS=Homo sapiens GN=AHSG PE=1 SV=1 - [FETUA_HUMAN]	56.68	9	16	939	367	39.2997	5.71924	0.946492	0.888915	1.00013	0.945179	1.18117	1.08267	0.943823	1.06922	0.883987	0.177833
P00734	Prothrombin OS=Homo sapiens GN=F2 PE=1 SV=2 - [THRB_HUMAN]	60.77	36	36	890	622	69.9921	5.89697	1.04683	0.898171	0.991182	0.978727	1.08599	0.940531	0.985427	1.00398	0.974844	0.700416
B4E1B2	cDNA FLJ53691, highly similar to Serotransferrin OS=Homo sapiens PE=2 SV=1 - [B4E1B2_HUMAN]	73.3	3	53	1085	678	74.7834	7.12256	1.4048	2.35991	0.873937	1.54622	0.399848	0.364032	0.342521	0.3688	4.19256	0.0537457
Q53H26	Transferrin variant (Fragment) OS=Homo sapiens PE=2 SV=1 - [Q53H26_HUMAN]	68.48	1	52	1078	698	77.0296	7.03467	0.837795	2.29921	0.911353	1.34945	0.289157	0.277149	0.320514	0.295607	4.56503	0.0910006
P00738	Haptoglobin OS=Homo sapiens GN=HP PE=1 SV=1 - [HPT_HUMAN]	65.76	13	25	760	406	45.1766	6.58057	0.910359	2.48694	0.297383	1.23156	0.661275	1.41319	2.78663	1.62037	0.760051	0.688444
P02675	Fibrinogen beta chain OS=Homo sapiens GN=FGB PE=1 SV=2 - [FIBB_HUMAN]	74.34	30	30	878	491	55.8923	8.26514	0.961799	1.29072	0.749608	1.00071	1.21492	0.996693	1.26691	1.15951	0.863047	0.422389
Q7Z7Q0	APOB protein OS=Homo sapiens GN=APOB PE=2 SV=1 - [Q7Z7Q0_HUMAN]	70.91	1	56	859	825	92.2752	7.41553	1.00464	1.87127	0.924873	1.26693	1.18088	1.44805	1.0654	1.23144	1.02881	0.917953
P02671	Fibrinogen alpha chain OS=Homo sapiens GN=FGA PE=1 SV=2 - [FIBA_HUMAN]	45.03	37	37	912	866	94.9144	6.01123	0.961729	1.27552	0.726485	0.987912	1.22447	0.991989	1.30584	1.1741	0.841422	0.370586
B7Z8Q7	cDNA FLJ53871, highly similar to Inter-alpha-trypsin inhibitor heavy chain H4 OS=Homo sapiens PE=2 SV=1 - [B7Z8Q7_HUMAN]	51.25	1	24	690	560	62.1228	5.51611	0.906342	1.00143	1.14131	1.01636	1.20191	1.03045	1.04598	1.09278	0.930069	0.431699
P01031	Complement C5 OS=Homo sapiens GN=C5 PE=1 SV=4 - [CO5_HUMAN]	57.82	81	81	871	1676	188.186	6.52197	0.968795	0.881567	0.942245	0.930869	1.20175	0.993991	1.12108	1.10561	0.841954	0.0565345
Q5VY30	Retinol binding protein 4, plasma, isoform CRA_b OS=Homo sapiens GN=RBP4 PE=1 SV=2 - [Q5VY30_HUMAN]	77.89	13	13	455	199	22.9591	6.0874	1.00948	0.945543	1.00989	0.988306	1.25445	1.06139	1.04971	1.12185	0.880962	0.128037
Q9Y490	Talin-1 OS=Homo sapiens GN=TLN1 PE=1 SV=3 - [TLN1_HUMAN]	59.35	99	120	549	2541	269.599	6.07471	1.06801	0.861832	1.14087	1.02357	0.610662	1.05456	1.01174	0.892321	1.14709	0.468924
H7C5H1	Complement factor B (Fragment) OS=Homo sapiens GN=CFB PE=1 SV=1 - [H7C5H1_HUMAN]	81.31	1	24	738	305	34.6699	7.06396	0.896665	0.904484	1.82625	1.20913	0.859258	1.1009	0.769132	0.909763	1.32906	0.407887
B7Z556	cDNA FLJ56822, highly similar to Alpha-2-HS-glycoprotein OS=Homo sapiens PE=2 SV=1 - [B7Z556_HUMAN]	45.31	1	8	525	245	27.3369	6.52197	0.986107	0.83389	1.13104	0.983678	1.09952	1.13151	1.00198	1.07767	0.912783	0.374936
P06396	Gelsolin OS=Homo sapiens GN=GSN PE=1 SV=1 - [GELS_HUMAN]	54.09	1	39	601	782	85.6442	6.27783	1.04815	0.780191	1.01282	0.947054	1.2342	0.974075	0.832051	1.01344	0.934492	0.670137
P02768	Serum albumin OS=Homo sapiens GN=ALB PE=1 SV=2 - [ALBU_HUMAN]	79.31	1	51	736	609	69.3215	6.27783	0.392732	3.45374	1.48193	1.77613	0.381614	0.350025	0.415479	0.382373	4.64503	0.194797
B7Z9A0	cDNA FLJ56212, highly similar to Gelsolin OS=Homo sapiens PE=2 SV=1 - [B7Z9A0_HUMAN]	57.22	1	39	587	755	83.0517	5.84619	1.04627	0.972323	1.04341	1.02067	1.07911	1.1627	0.979553	1.07379	0.950529	0.413023
Q9UNU2	Complement protein C4B frameshift mutant (Fragment) OS=Homo sapiens GN=C4B PE=4 SV=1 - [Q9UNU2_HUMAN]	66.1	1	15	492	354	38.1144	8.52881	1.01248	0.599563	0.799876	0.803975	0.42828	0.849743	0.948888	0.742303	1.08308	0.772339
B7Z992	cDNA FLJ53698, highly similar to Gelsolin OS=Homo sapiens PE=2 SV=1 - [B7Z992_HUMAN]	54.55	1	37	580	715	78.7827	6.11279	1.11217	0.887532	1.18573	1.06181	0.614025	0.963501	0.884991	0.820839	1.29357	0.157432
P06727	Apolipoprotein A-IV OS=Homo sapiens GN=APOA4 PE=1 SV=3 - [APOA4_HUMAN]	81.82	33	34	723	396	45.3715	5.37646	0.853394	0.891708	1.01032	0.918473	1.19485	0.961094	1.06272	1.07289	0.856076	0.134661
B2R8I2	cDNA, FLJ93914, highly similar to Homo sapiens histidine-rich glycoprotein (HRG), mRNA OS=Homo sapiens PE=2 SV=1 - [B2R8I2_HUMAN]	54.1	2	25	630	525	59.4748	7.44482	1.07701	0.787021	1.00717	0.957067	1.22213	0.972963	1.17285	1.12265	0.852508	0.226393
P60709	Actin, cytoplasmic 1 OS=Homo sapiens GN=ACTB PE=1 SV=1 - [ACTB_HUMAN]	58.13	1	17	396	375	41.7097	5.47803	1.07822	0.992169	1.26688	1.11242	0.521387	1.00524	0.936255	0.820961	1.35503	0.164463
P04196	Histidine-rich glycoprotein OS=Homo sapiens GN=HRG PE=1 SV=1 - [HRG_HUMAN]	52.57	1	24	622	525	59.5409	7.50342	1.06732	1.80326	0.279085	1.04989	1.54274	0.838954	0.507761	0.96315	1.09006	0.879184
F6KPG5	Albumin (Fragment) OS=Homo sapiens PE=2 SV=1 - [F6KPG5_HUMAN]	82.56	1	51	713	585	66.488	6.03662	0.286418	4.09462	1.35536	1.91213	0.217222	0.249142	0.288262	0.251542	7.60165	0.21702
P63261	Actin, cytoplasmic 2 OS=Homo sapiens GN=ACTG1 PE=1 SV=1 - [ACTG_HUMAN]	58.13	1	17	382	375	41.7658	5.47803	1.08217	0.886739	1.27608	1.08166	0.762287	1.32797	0.855004	0.981755	1.10176	0.656271
Q6MZW0	Uncharacterized protein DKFZp686J11235 (Fragment) OS=Homo sapiens GN=DKFZp686J11235 PE=1 SV=1 - [Q6MZW0_HUMAN]	40.71	1	15	434	506	54.4249	6.771	0.856723	2.7265	0.474441	1.35256	1.29096	0.87198	1.77559	1.31284	1.03025	0.959946
Q6ZW64	cDNA FLJ41552 fis, clone COLON2004478, highly similar to Protein Tro alpha1 H,myeloma OS=Homo sapiens PE=2 SV=1 - [Q6ZW64_HUMAN]	43.32	2	15	434	494	53.2872	6.52197	0.600591	3.85904	0.35239	1.60401	0.830063	0.85455	1.93222	1.20561	1.33045	0.753972
Q96K68	cDNA FLJ14473 fis, clone MAMMA1001080, highly similar to Homo sapiens SNC73 protein (SNC73) mRNA OS=Homo sapiens PE=2 SV=1 - [Q96K68_HUMAN]	44.74	1	16	432	494	53.0542	6.85889	0.911889	2.83071	0.435348	1.39265	0.950594	1.22891	1.84754	1.34235	1.03747	0.951586
Q8NCL6	cDNA FLJ90170 fis, clone MAMMA1000370, highly similar to Ig alpha-1 chain C region OS=Homo sapiens PE=2 SV=1 - [Q8NCL6_HUMAN]	42.19	1	15	431	493	53.1903	6.52197	0.702056	3.08912	0.279749	1.35698	1.41904	0.98533	1.94201	1.44879	0.936627	0.925087
P13671	Complement component C6 OS=Homo sapiens GN=C6 PE=1 SV=3 - [CO6_HUMAN]	45.18	3	39	470	934	104.718	6.75635	0.967255	0.891744	0.900411	0.919803	1.12118	0.941282	1.01774	1.02673	0.895853	0.135574
B2R950	cDNA, FLJ94213, highly similar to Homo sapiens pregnancy-zone protein (PZP), mRNA OS=Homo sapiens PE=2 SV=1 - [B2R950_HUMAN]	34.55	29	45	453	1482	163.768	6.37939	1.20928	1.31025	0.784625	1.10138	1.16343	0.942658	1.08756	1.06455	1.0346	0.842316
P02760	Protein AMBP OS=Homo sapiens GN=AMBP PE=1 SV=1 - [AMBP_HUMAN]	48.01	14	14	385	352	38.974	6.25244	0.979308	1.0295	0.890142	0.966317	1.13075	0.961206	1.03131	1.04109	0.928177	0.306727
A8K8Z4	cDNA FLJ78071, highly similar to Human MHC class III complement component C6 mRNA OS=Homo sapiens PE=2 SV=1 - [A8K8Z4_HUMAN]	42.08	1	37	454	934	104.649	6.62451	1.06006	1.12674	0.61133	0.932711	1.02681	0.967419	1.07656	1.02359	0.911211	0.610842
G3XAM2	Complement factor I OS=Homo sapiens GN=CFI PE=1 SV=1 - [G3XAM2_HUMAN]	47.74	7	25	392	576	65.0163	7.50342	0.946726	0.96717	0.977301	0.963732	1.13213	1.00068	0.963108	1.03197	0.933873	0.25983
P43652	Afamin OS=Homo sapiens GN=AFM PE=1 SV=1 - [AFAM_HUMAN]	62.44	39	39	586	599	69.024	5.89697	0.858617	0.863682	0.979974	0.900758	1.13567	0.872527	0.965532	0.991244	0.908714	0.355269
D6RF20	Vitamin D-binding protein (Fragment) OS=Homo sapiens GN=GC PE=1 SV=1 - [D6RF20_HUMAN]	75.86	1	11	453	145	16.0728	5.8335	0.765914	0.705289	1.19663	0.889276	1.1843	0.989612	1.00053	1.05815	0.840409	0.369284
Q6P5S8	IGK@ protein OS=Homo sapiens GN=IGK@ PE=1 SV=1 - [Q6P5S8_HUMAN]	46.61	1	7	287	236	25.7568	6.32861	1.12531	1.7161	0.513368	1.11826	1.05916	1.18098	1.63379	1.29131	0.865989	0.679238
Q5EFE6	Anti-RhD monoclonal T125 kappa light chain OS=Homo sapiens PE=2 SV=1 - [Q5EFE6_HUMAN]	42.74	1	6	282	234	25.6817	8.42627	0.496488	4.74711	0.402415	1.88201	0.633518	0.71851	1.04718	0.799734	2.35329	0.493645
P00739	Haptoglobin-related protein OS=Homo sapiens GN=HPR PE=2 SV=2 - [HPTR_HUMAN]	50.57	5	17	409	348	39.0047	7.09326	1.25693	2.84316	0.472245	1.52411	1.07038	1.12252	1.08213	1.09168	1.39612	0.568856
A8K2N0	cDNA FLJ77835, highly similar to Homo sapiens complement component 1, s subcomponent (C1S), transcript variant 2, mRNA OS=Homo sapiens PE=2 SV=1 - [A8K2N0_HUMAN]	47.24	25	26	345	688	76.5628	4.98291	0.958553	0.949981	0.993928	0.967487	1.08445	0.967569	0.98685	1.01296	0.955111	0.304081
B2R6W1	cDNA, FLJ93143, highly similar to Homo sapiens complement component 7 (C7), mRNA OS=Homo sapiens PE=2 SV=1 - [B2R6W1_HUMAN]	60.38	1	39	361	843	93.4853	6.48096	0.938471	1.00276	0.772358	0.90453	1.07854	0.754609	1.03499	0.956046	0.946115	0.695774
Q6GMV8	Uncharacterized protein OS=Homo sapiens PE=2 SV=1 - [Q6GMV8_HUMAN]	53.85	2	10	330	234	24.8943	6.66846	0.673707	3.24372	0.369396	1.42894	0.966561	1.02575	1.62665	1.20632	1.18454	0.823637
P10643	Complement component C7 OS=Homo sapiens GN=C7 PE=1 SV=2 - [CO7_HUMAN]	61.57	2	40	363	843	93.4573	6.48096	0.962307	0.759032	1.0601	0.927146	1.08093	1.08918	0.877275	1.0158	0.912729	0.474919
B4E1D8	cDNA FLJ51597, highly similar to C4b-binding protein alpha chain OS=Homo sapiens PE=2 SV=1 - [B4E1D8_HUMAN]	58.4	2	27	488	536	60.3658	6.65381	0.985694	1.26585	0.807008	1.01952	1.30898	1.0046	1.11081	1.14147	0.893165	0.48989
Q8NEJ1	Uncharacterized protein OS=Homo sapiens PE=2 SV=1 - [Q8NEJ1_HUMAN]	52.54	1	10	334	236	25.0083	7.69385	0.944853	2.40513	0.320717	1.22357	1.47001	1.17499	2.02342	1.55614	0.786284	0.643661
P04003	C4b-binding protein alpha chain OS=Homo sapiens GN=C4BPA PE=1 SV=2 - [C4BPA_HUMAN]	51.09	1	26	485	597	66.9894	7.29834	0.93539	1.54084	0.636828	1.03768	1.01741	1.43912	1.25224	1.23625	0.839378	0.534574
S6BGD6	IgG L chain OS=Homo sapiens PE=1 SV=1 - [S6BGD6_HUMAN]	55.74	1	10	331	235	24.8081	7.23975	1.10694	2.27116	0.469929	1.28268	1.18652	1.22367	1.30087	1.23702	1.03691	0.935297
P0DOX7	Immunoglobulin kappa light chain OS=Homo sapiens PE=1 SV=1 - [IGK_HUMAN]	53.74	1	7	269	214	23.3644	7.1665	1.05761	2.82005	0.299179	1.39228	1.144	1.11416	2.32539	1.52785	0.911268	0.880531
A0A024QZN4	Vinculin, isoform CRA_c OS=Homo sapiens GN=VCL PE=4 SV=1 - [A0A024QZN4_HUMAN]	74.11	13	73	393	1066	116.649	6.0874	1.14211	0.93202	1.18856	1.08756	0.648491	1.00115	0.892208	0.847284	1.28359	0.139985
Q6GMX4	IGL@ protein OS=Homo sapiens GN=IGL@ PE=2 SV=1 - [Q6GMX4_HUMAN]	50	1	9	328	236	24.7941	6.88818	0.86852	1.78535	0.682795	1.11222	1.20166	0.925029	1.11301	1.0799	1.02993	0.930949
Q6IN99	IGL@ protein OS=Homo sapiens GN=IGL@ PE=2 SV=1 - [Q6IN99_HUMAN]	50.21	1	10	332	235	24.8722	6.7417	0.883653	1.75548	0.727585	1.12224	0.826671	1.11212	1.59536	1.17805	0.952626	0.893307
A0A140VJJ6	Testicular tissue protein Li 70 OS=Homo sapiens PE=2 SV=1 - [A0A140VJJ6_HUMAN]	75.06	3	28	494	437	49.465	6.0874	0.965773	1.23415	0.728105	0.976008	1.22152	0.990516	1.34653	1.18619	0.82281	0.306756
P10909	Clusterin OS=Homo sapiens GN=CLU PE=1 SV=1 - [CLUS_HUMAN]	40.09	20	20	406	449	52.461	6.26514	0.941525	0.833714	1.11792	0.964387	1.01279	0.887678	0.856793	0.919086	1.04929	0.660254
Q5FWF9	IGL@ protein OS=Homo sapiens GN=IGL@ PE=1 SV=1 - [Q5FWF9_HUMAN]	51.29	3	10	319	232	24.7792	5.59229	0.834463	2.3467	0.496438	1.22587	1.24516	1.49442	1.63803	1.4592	0.840093	0.708177
Q6ZVX0	cDNA FLJ41981 fis, clone SMINT2011888, highly similar to Protein Tro alpha1 H,myeloma OS=Homo sapiens PE=2 SV=1 - [Q6ZVX0_HUMAN]	49.49	1	15	352	487	52.841	5.92236	0.739203	3.25756	0.341174	1.44598	1.0154	0.778651	1.59595	1.13	1.27963	0.754844
P04004	Vitronectin OS=Homo sapiens GN=VTN PE=1 SV=1 - [VTNC_HUMAN]	47.28	18	18	427	478	54.2712	5.79541	0.972021	0.852829	1.01036	0.94507	1.05458	0.9751	0.897874	0.975851	0.968458	0.663092
Q9NPP6	Immunoglobulin heavy chain variant (Fragment) OS=Homo sapiens PE=2 SV=1 - [Q9NPP6_HUMAN]	54.33	1	14	341	416	44.758	6.12549	1.06038	1.74566	0.704614	1.17022	1.17849	1	1.39599	1.19149	0.982145	0.951138
Q6P089	IGH@ protein OS=Homo sapiens GN=IGH@ PE=2 SV=1 - [Q6P089_HUMAN]	47.08	1	14	339	480	51.9646	6.31592	0.902776	2.53884	0.325252	1.25562	1.08641	1.03884	2.55263	1.55929	0.805252	0.73252
S6BAR0	IgG L chain OS=Homo sapiens PE=2 SV=1 - [S6BAR0_HUMAN]	43.98	2	8	286	216	23.1073	7.69385	1.13888	1.82397	0.432188	1.13168	1.36953	1.19308	1.28684	1.28315	0.881952	0.727384
D3DP16	Fibrinogen gamma chain, isoform CRA_a OS=Homo sapiens GN=FGG PE=4 SV=1 - [D3DP16_HUMAN]	84.73	1	26	454	334	37.7142	6.29053	0.938259	1.43351	0.646283	1.00602	1.44152	0.864211	1.2576	1.18777	0.846976	0.559603
Q7Z379	Uncharacterized protein DKFZp686K04218 (Fragment) OS=Homo sapiens GN=DKFZp686K04218 PE=2 SV=1 - [Q7Z379_HUMAN]	42.47	1	12	303	478	51.5877	6.52197	1.1174	2.16624	0.494317	1.25932	1.11708	1.20408	1.73696	1.35271	0.930962	0.867437
P02649	Apolipoprotein E OS=Homo sapiens GN=APOE PE=1 SV=1 - [APOE_HUMAN]	77.29	11	25	301	317	36.1318	5.73193	1.0129	0.945201	1.06022	1.00611	1.03349	0.766522	0.90614	0.902049	1.11536	0.283187
B7Z1F8	cDNA FLJ53025, highly similar to Complement C4-B OS=Homo sapiens PE=2 SV=1 - [B7Z1F8_HUMAN]	71.11	2	18	516	270	30.4248	7.98682	0.848867	0.720632	0.871349	0.813616	0.825488	0.779346	0.755486	0.786773	1.03412	0.628075
D9IWP9	Beta-2-glycoprotein I (Fragment) OS=Homo sapiens PE=2 SV=1 - [D9IWP9_HUMAN]	66.26	21	21	509	326	36.2306	8.00146	0.959791	0.892358	0.996939	0.949696	1.21006	1.0329	0.972704	1.07189	0.886	0.190159
Q5EBM2	Uncharacterized protein OS=Homo sapiens PE=1 SV=1 - [Q5EBM2_HUMAN]	49.13	8	17	316	519	56.7768	6.85889	0.992451	3.15117	0.341155	1.49493	1.05977	1.2617	1.35879	1.22676	1.2186	0.769138
B4E3Q9	cDNA FLJ59659, highly similar to Vinculin OS=Homo sapiens PE=2 SV=1 - [B4E3Q9_HUMAN]	68.39	1	61	316	927	100.875	5.47803	1.00896	0.980566	1.04155	1.01036	0.776129	1.0125	0.923474	0.904034	1.11761	0.209334
P04217	Alpha-1B-glycoprotein OS=Homo sapiens GN=A1BG PE=1 SV=4 - [A1BG_HUMAN]	57.17	16	16	476	495	54.2195	5.85889	0.993816	0.954563	0.972917	0.973765	1.08342	0.97165	1.01942	1.02483	0.950171	0.210857
S6C4R7	IgG L chain OS=Homo sapiens PE=2 SV=1 - [S6C4R7_HUMAN]	41.51	2	7	243	212	22.4992	8.23584	0.882794	1.52071	0.580761	0.994754	1.57217	1.26609	1.60637	1.48154	0.671431	0.177039
P03952	Plasma kallikrein OS=Homo sapiens GN=KLKB1 PE=1 SV=1 - [KLKB1_HUMAN]	52.19	32	32	375	638	71.3228	8.22119	1.08115	0.982157	0.948053	1.00379	1.08912	1.01048	0.960807	1.02014	0.983973	0.779768
P25311	Zinc-alpha-2-glycoprotein OS=Homo sapiens GN=AZGP1 PE=1 SV=2 - [ZA2G_HUMAN]	60.74	21	21	423	298	34.2371	6.04932	0.976813	0.91296	0.954999	0.948257	1.17754	1.01942	1.05952	1.0855	0.873571	0.05467
A0M8Q6	Immunoglobulin lambda constant 7 OS=Homo sapiens GN=IGLC7 PE=1 SV=3 - [IGLC7_HUMAN]	65.09	2	6	207	106	11.2466	8.29443	0.96229	3.38949	0.278334	1.54337	0.833957	0.812754	2.58314	1.40995	1.09463	0.910232
P07357	Complement component C8 alpha chain OS=Homo sapiens GN=C8A PE=1 SV=2 - [CO8A_HUMAN]	46.4	20	20	225	584	65.121	6.46826	0.953421	0.9085	0.881885	0.914602	1.11477	0.953657	1.03738	1.03527	0.883443	0.0771204
P05155	Plasma protease C1 inhibitor OS=Homo sapiens GN=SERPING1 PE=1 SV=2 - [IC1_HUMAN]	31.6	17	17	325	500	55.1194	6.55127	0.766121	1.11721	0.901253	0.928193	1.1803	1.11885	1.19921	1.16612	0.79597	0.0862755
Q9P1C5	PRO2769 OS=Homo sapiens PE=2 SV=1 - [Q9P1C5_HUMAN]	26.11	1	9	373	494	55.3328	6.37939	0.96076	0.920618	1.07363	0.985002	0.924464	0.958635	0.87799	0.920363	1.07023	0.277129
Q53GY3	Angiotensinogen variant (Fragment) OS=Homo sapiens PE=2 SV=1 - [Q53GY3_HUMAN]	44.54	16	16	227	485	53.0505	6.23975	1.0079	0.882069	0.930924	0.940297	1.10781	0.925248	0.951465	0.994841	0.945173	0.465864
Q06033	Inter-alpha-trypsin inhibitor heavy chain H3 OS=Homo sapiens GN=ITIH3 PE=1 SV=2 - [ITIH3_HUMAN]	32.81	29	29	330	890	99.7865	5.74463	0.920544	0.95363	0.952781	0.942318	1.03178	0.970451	1.18068	1.06097	0.888164	0.134418
B1AKG0	Complement factor H-related protein 1 OS=Homo sapiens GN=CFHR1 PE=1 SV=1 - [B1AKG0_HUMAN]	45.76	1	12	277	271	30.8379	7.81104	0.715647	1.0692	0.908663	0.897835	1.22571	0.931392	1.13099	1.09603	0.819168	0.21335
Q96PD5	N-acetylmuramoyl-L-alanine amidase OS=Homo sapiens GN=PGLYRP2 PE=1 SV=1 - [PGRP2_HUMAN]	40.63	11	13	171	576	62.1779	7.54736	0.987527	0.846196	0.994923	0.942882	1.09231	0.954457	0.907953	0.984908	0.95733	0.598187
P01871	Immunoglobulin heavy constant mu OS=Homo sapiens GN=IGHM PE=1 SV=4 - [IGHM_HUMAN]	64.02	3	24	287	453	49.4086	6.771	1.48054	1.58655	0.431688	1.16626	1.3047	1.39207	1.41249	1.36975	0.851436	0.611629
A0A1U9X8W4	C2 OS=Homo sapiens PE=3 SV=1 - [A0A1U9X8W4_HUMAN]	44.55	6	33	317	752	83.2744	7.41553	0.979639	0.868355	0.989098	0.945697	1.17362	0.974015	0.981897	1.04318	0.906554	0.268408
H7C0N0	Inter-alpha-trypsin inhibitor heavy chain H1 (Fragment) OS=Homo sapiens GN=ITIH1 PE=1 SV=1 - [H7C0N0_HUMAN]	25	1	8	272	464	51.831	6.18896	1.01994	0.947975	0.923501	0.963804	1.14896	0.987006	1.03846	1.05814	0.910846	0.166515
B4DN21	cDNA FLJ53365, highly similar to Homo sapiens fibronectin 1 (FN1), transcript variant 4, mRNA OS=Homo sapiens PE=2 SV=1 - [B4DN21_HUMAN]	62.09	2	14	236	306	34.4778	5.64307	0.923252	1.1057	1.00189	1.01028	1.22618	0.883204	0.911061	1.00682	1.00344	0.978687
P01024	Complement C3 OS=Homo sapiens GN=C3 PE=1 SV=2 - [CO3_HUMAN]	51.47	78	78	309	1663	187.03	6.40479	0.968596	1.03506	0.887348	0.963666	1.11338	1.02614	1.06586	1.06846	0.901919	0.102162
Q53HT9	Complement component 1, r subcomponent variant (Fragment) OS=Homo sapiens PE=2 SV=1 - [Q53HT9_HUMAN]	52.48	27	29	264	705	80.189	6.44287	0.94193	0.880818	0.95293	0.925226	1.15178	0.984649	0.985951	1.04079	0.888961	0.125709
A0A0S2Z3V0	Apolipoprotein E isoform 2 (Fragment) OS=Homo sapiens GN=APOE PE=2 SV=1 - [A0A0S2Z3V0_HUMAN]	81.48	1	15	196	189	21.669	4.7417	0.577927	1.3275	1.4521	1.11918	1.78804	0.577153	0.649715	1.00497	1.11364	0.822824
Q86TT1	Full-length cDNA clone CS0DD006YL02 of Neuroblastoma of Homo sapiens (human) OS=Homo sapiens PE=2 SV=1 - [Q86TT1_HUMAN]	68.8	1	20	245	375	41.2465	6.78564	1.48148	1.19189	0.547334	1.07357	1.36436	1.62128	1.05453	1.34672	0.797169	0.442781
P51884	Lumican OS=Homo sapiens GN=LUM PE=1 SV=2 - [LUM_HUMAN]	43.2	13	13	234	338	38.4048	6.60986	0.941753	0.937336	1.02082	0.966636	1.07704	1.02198	0.924707	1.00791	0.959051	0.472915
P05543	Thyroxine-binding globulin OS=Homo sapiens GN=SERPINA7 PE=1 SV=2 - [THBG_HUMAN]	50.6	19	19	234	415	46.2946	6.30322	0.902269	0.9686	1.01791	0.962927	1.06903	1.01955	0.910763	0.99978	0.963139	0.556528
P08697	Alpha-2-antiplasmin OS=Homo sapiens GN=SERPINF2 PE=1 SV=3 - [A2AP_HUMAN]	41.55	18	18	220	491	54.5311	6.29053	1.02336	0.938873	0.99574	0.98599	1.07108	0.964935	1.01502	1.01701	0.969498	0.475917
P0DOX2	Immunoglobulin alpha-2 heavy chain OS=Homo sapiens PE=1 SV=1 - [IGA2_HUMAN]	47.91	2	14	245	455	48.9042	6.81494	1.12707	2.54967	0.478264	1.385	1.01523	0.665088	2.15603	1.27878	1.08306	0.895532
P21333	Filamin-A OS=Homo sapiens GN=FLNA PE=1 SV=4 - [FLNA_HUMAN]	43.97	90	90	251	2647	280.564	6.06201	0.891273	0.814375	1.25213	0.985926	0.574048	1.03382	1.41425	1.00737	0.978711	0.942187
H6VRF8	Keratin 1 OS=Homo sapiens GN=KRT1 PE=3 SV=1 - [H6VRF8_HUMAN]	47.52	28	34	214	644	66.013	8.11865	0.868307	0.828922	1.17523	0.957487	0.963507	1.0254	0.953595	0.980836	0.976195	0.8447
Q6N041	Uncharacterized protein DKFZp686O16217 (Fragment) OS=Homo sapiens GN=DKFZp686O16217 PE=2 SV=1 - [Q6N041_HUMAN]	34.74	1	12	247	498	54.0905	7.18115	1.1006	1.97478	0.258871	1.11142	1.54291	2.18744	1.20152	1.64396	0.676062	0.405698
P02647	Apolipoprotein A-I OS=Homo sapiens GN=APOA1 PE=1 SV=1 - [APOA1_HUMAN]	65.17	19	19	251	267	30.7589	5.75732	1.33685	4.14641	0.442463	1.97524	0.61728	0.576836	0.559265	0.58446	3.3796	0.280685
P0DOX6	Immunoglobulin mu heavy chain OS=Homo sapiens PE=1 SV=1 - [IGM_HUMAN]	39.76	1	19	199	576	63.4462	7.86963	1.14767	2.54651	0.510207	1.40146	0.87215	0.605569	2.04462	1.17411	1.19364	0.775843
P68871	Hemoglobin subunit beta OS=Homo sapiens GN=HBB PE=1 SV=2 - [HBB_HUMAN]	82.99	1	11	162	147	15.9883	7.28369	1.26837	1.93483	0.253102	1.1521	0.698449	1.339	3.15827	1.7319	0.665221	0.547811
P01009	Alpha-1-antitrypsin OS=Homo sapiens GN=SERPINA1 PE=1 SV=3 - [A1AT_HUMAN]	62.2	28	28	278	418	46.707	5.59229	0.729979	5.28674	0.401634	2.13945	0.394849	0.382838	0.375746	0.384478	5.56456	0.328004
Q6GMX6	IGH@ protein OS=Homo sapiens GN=IGH@ PE=1 SV=1 - [Q6GMX6_HUMAN]	37.42	2	15	181	465	51.0507	8.68994	1.06974	2.89198	0.34096	1.43423	0.919047	1.09428	1.7414	1.25158	1.14594	0.830348
P27169	Serum paraoxonase/arylesterase 1 OS=Homo sapiens GN=PON1 PE=1 SV=3 - [PON1_HUMAN]	47.32	12	14	173	355	39.7062	5.22412	1.11123	0.811001	1.1101	1.01078	0.922866	0.800567	0.833821	0.852418	1.18578	0.210717
V9HW68	Epididymis luminal protein 214 OS=Homo sapiens GN=HEL-214 PE=2 SV=1 - [V9HW68_HUMAN]	34.04	1	14	178	470	51.6828	7.75244	1.0691	1.86821	0.609943	1.18242	1.24189	0.96831	1.4017	1.20397	0.982098	0.95845
P12814	Alpha-actinin-1 OS=Homo sapiens GN=ACTN1 PE=1 SV=2 - [ACTN1_HUMAN]	61.88	34	50	218	892	102.993	5.41455	1.09149	0.956009	1.25228	1.09993	0.519637	0.963107	1.0813	0.85468	1.28695	0.268904
P22792	Carboxypeptidase N subunit 2 OS=Homo sapiens GN=CPN2 PE=1 SV=3 - [CPN2_HUMAN]	36.51	15	15	219	545	60.5181	5.98584	0.957558	0.933128	0.935127	0.941938	1.11719	1.02375	0.953649	1.03153	0.913147	0.135462
Q6PIK1	IGL@ protein OS=Homo sapiens GN=IGL@ PE=1 SV=1 - [Q6PIK1_HUMAN]	50.21	1	10	191	235	24.8421	7.7085	1.08207	2.09514	0.352238	1.17648	1.17425	1.45051	1.96804	1.53093	0.768474	0.558681
O75882	Attractin OS=Homo sapiens GN=ATRN PE=1 SV=2 - [ATRN_HUMAN]	23.51	1	34	212	1429	158.432	7.31299	0.996961	0.960174	0.942782	0.966639	1.0506	1.03993	0.963066	1.01787	0.949672	0.183188
Q6GMW4	IGL@ protein OS=Homo sapiens GN=IGL@ PE=2 SV=1 - [Q6GMW4_HUMAN]	47.64	1	9	188	233	24.8393	6.7417	1.09118	1.93971	0.795275	1.27539	0.745375	1.02598	1.22846	0.99994	1.27546	0.498467
B4DZ36	cDNA FLJ58441, highly similar to Attractin OS=Homo sapiens PE=2 SV=1 - [B4DZ36_HUMAN]	28.37	1	34	210	1156	129.748	6.87354	0.957609	1.00361	1.09061	1.01728	0.931125	1.04637	0.787367	0.921622	1.10379	0.320706
Q68CK4	Leucine-rich alpha-2-glycoprotein OS=Homo sapiens GN=HMFT1766 PE=2 SV=1 - [Q68CK4_HUMAN]	42.07	1	12	188	347	38.1441	6.94678	0.724962	0.954817	0.726919	0.802233	0.786511	1.18398	1.9684	1.31296	0.61101	0.224181
Q5CZ94	Uncharacterized protein DKFZp781M0386 OS=Homo sapiens GN=DKFZp781M0386 PE=2 SV=1 - [Q5CZ94_HUMAN]	44.02	1	8	178	234	24.9863	7.26904	1.17049	1.9335	0.471462	1.19182	1.35008	1.18971	1.51122	1.35034	0.882607	0.732406
Q6MZQ6	Uncharacterized protein DKFZp686G11190 OS=Homo sapiens GN=DKFZp686G11190 PE=2 SV=1 - [Q6MZQ6_HUMAN]	30.32	1	12	161	475	52.01	8.06006	1.1294	2.4991	0.474213	1.36757	1.14097	1.01991	1.85104	1.33731	1.02263	0.96512
P02775	Platelet basic protein OS=Homo sapiens GN=PPBP PE=1 SV=3 - [CXCL7_HUMAN]	51.56	9	9	230	128	13.8854	8.79248	1.15018	0.961932	1.1392	1.08377	0.508802	1.02662	0.84133	0.79225	1.36797	0.148788
Q6N095	Uncharacterized protein OS=Homo sapiens GN=DKFZp686K03196 PE=1 SV=1 - [Q6N095_HUMAN]	27.58	1	11	159	475	52.3271	8.57275	1.05793	2.73015	0.274375	1.35415	1.23666	1.14052	1.90398	1.42705	0.948915	0.928475
P02743	Serum amyloid P-component OS=Homo sapiens GN=APCS PE=1 SV=2 - [SAMP_HUMAN]	31.84	7	7	168	223	25.3711	6.53662	0.994056	0.871776	0.899963	0.921932	1.14663	0.987614	1.15343	1.09589	0.841262	0.0568394
Q6N089	Uncharacterized protein OS=Homo sapiens GN=DKFZp686P15220 PE=1 SV=1 - [Q6N089_HUMAN]	30.51	1	12	161	472	51.6918	7.92822	0.969156	2.46046	0.522331	1.31732	1.23235	0.982953	1.42644	1.21391	1.08518	0.871508
Q6N094	Uncharacterized protein DKFZp686O01196 OS=Homo sapiens GN=DKFZp686O01196 PE=2 SV=1 - [Q6N094_HUMAN]	30	1	12	158	480	52.5794	8.17725	0.790052	2.27679	0.61038	1.22574	1.20047	0.932883	1.81728	1.31688	0.930793	0.884611
P0DOX5	Immunoglobulin gamma-1 heavy chain OS=Homo sapiens PE=1 SV=1 - [IGG1_HUMAN]	29.84	1	11	157	449	49.2992	8.71924	1.04155	2.07113	0.506608	1.20643	1.34178	1.11729	1.45091	1.30333	0.925652	0.846562
P35908	Keratin, type II cytoskeletal 2 epidermal OS=Homo sapiens GN=KRT2 PE=1 SV=2 - [K22E_HUMAN]	52.11	25	33	157	639	65.3932	8.00146	0.756781	0.715212	1.02581	0.832602	0.776293	0.959479	0.995132	0.910301	0.914644	0.548223
B0AZL7	cDNA, FLJ79457, highly similar to Insulin-like growth factor-binding proteincomplex acid labile chain OS=Homo sapiens PE=2 SV=1 - [B0AZL7_HUMAN]	45.79	22	22	149	605	65.9598	6.78564	0.995046	0.976172	0.950738	0.973985	1.15281	0.97642	0.983192	1.03747	0.938806	0.343276
P02750	Leucine-rich alpha-2-glycoprotein OS=Homo sapiens GN=LRG1 PE=1 SV=2 - [A2GL_HUMAN]	42.07	1	12	185	347	38.1541	6.94678	0.951146	0.928155	0.717757	0.865686	1.60877	1.35299	0.684848	1.21554	0.712185	0.287299
A8K3K1	cDNA FLJ78096, highly similar to Homo sapiens actin, alpha, cardiac muscle (ACTC), mRNA OS=Homo sapiens PE=2 SV=1 - [A8K3K1_HUMAN]	37.67	1	12	222	377	42.0199	5.38916	1.13548	0.955659	1.15309	1.08141	0.592488	1.03656	1.0993	0.90945	1.18908	0.372829
P23142	Fibulin-1 OS=Homo sapiens GN=FBLN1 PE=1 SV=4 - [FBLN1_HUMAN]	39.26	6	20	146	703	77.1624	5.22412	0.798483	0.850385	1.04613	0.898334	1.16294	0.863193	0.912561	0.979565	0.917074	0.534166
P13645	Keratin, type I cytoskeletal 10 OS=Homo sapiens GN=KRT10 PE=1 SV=6 - [K1C10_HUMAN]	52.91	26	29	161	584	58.7917	5.21143	0.793655	0.735898	1.07033	0.866627	0.854757	0.953274	1.08317	0.963734	0.899239	0.472593
B2R6V9	cDNA, FLJ93141, highly similar to Homo sapiens coagulation factor XIII, A1 polypeptide (F13A1), mRNA OS=Homo sapiens PE=2 SV=1 - [B2R6V9_HUMAN]	36.34	24	24	157	732	83.1886	5.99854	1.14043	0.907682	0.993671	1.01393	0.99733	0.962407	1.03391	0.997881	1.01608	0.83231
P12259	Coagulation factor V OS=Homo sapiens GN=F5 PE=1 SV=4 - [FA5_HUMAN]	28.24	50	58	215	2224	251.546	6.04932	0.953342	0.963193	0.964033	0.960189	1.07836	0.909595	0.992428	0.993462	0.966508	0.533128
B2R9F2	cDNA, FLJ94361, highly similar to Homo sapiens serine (or cysteine) proteinase inhibitor, clade A(alpha-1 antiproteinase, antitrypsin), member 6 (SERPINA6), mRNA OS=Homo sapiens PE=2 SV=1 - [B2R9F2_HUMAN]	31.6	10	10	178	405	45.0659	6.03662	1.05443	1.1259	0.905943	1.02876	1.11063	1.02356	0.980671	1.03829	0.990823	0.905315
A0A1B1CYC9	Vitamin D binding protein (Fragment) OS=Homo sapiens GN=Gc PE=4 SV=1 - [A0A1B1CYC9_HUMAN]	65.63	7	7	151	32	3.49682	9.11475	1.14557	1.16043	1.15755	1.15452	0.931601	0.551771	1.10508	0.862819	1.33807	0.148883
B3VL17	Beta globin (Fragment) OS=Homo sapiens PE=3 SV=1 - [B3VL17_HUMAN]	93.33	1	10	122	105	11.4748	6.3667	1.15351	1.65053	0.624725	1.14292	0.821827	1.07799	1.79063	1.23015	0.92909	0.843564
B2R815	cDNA, FLJ93695, highly similar to Homo sapiens serpin peptidase inhibitor, clade A (alpha-1 antiproteinase, antitrypsin), member 4 (SERPINA4), mRNA OS=Homo sapiens PE=2 SV=1 - [B2R815_HUMAN]	55.27	21	21	174	427	48.4951	7.75244	0.932653	0.884348	0.973276	0.930092	1.20703	1.0125	0.970782	1.06344	0.874609	0.159212
A8K1K1	cDNA FLJ76342, highly similar to Homo sapiens carnosine dipeptidase 1 (metallopeptidase M20 family)(CNDP1), mRNA OS=Homo sapiens PE=2 SV=1 - [A8K1K1_HUMAN]	48.52	19	19	141	507	56.6982	5.36377	1.0259	0.918616	0.984731	0.976414	1.11869	0.909416	1.00915	1.01242	0.964437	0.624664
P35527	Keratin, type I cytoskeletal 9 OS=Homo sapiens GN=KRT9 PE=1 SV=3 - [K1C9_HUMAN]	45.43	23	24	142	623	62.0268	5.23682	0.956911	0.867594	1.2364	1.0203	0.99583	1.05482	0.857878	0.96951	1.05239	0.70635
P05160	Coagulation factor XIII B chain OS=Homo sapiens GN=F13B PE=1 SV=3 - [F13B_HUMAN]	56.28	29	29	164	661	75.4612	6.39209	1.00388	0.99033	0.919161	0.971124	1.19159	0.974661	1.06668	1.07765	0.901153	0.192987
Q13707	ACTA2 protein (Fragment) OS=Homo sapiens GN=ACTA2 PE=3 SV=1 - [Q13707_HUMAN]	35.45	1	9	197	330	36.7832	5.35107	1.05148	1.02178	1.04146	1.03824	0.879811	1.00484	1.0482	0.977618	1.06201	0.302197
B4DUV1	Fibulin-1 OS=Homo sapiens PE=2 SV=1 - [B4DUV1_HUMAN]	37.13	1	17	121	641	70.1077	5.26221	1.04058	1.08341	0.940262	1.02142	1.12809	1.03056	1.03433	1.06432	0.959685	0.464185
L8E853	von Willebrand factor OS=Homo sapiens GN=VWF PE=4 SV=1 - [L8E853_HUMAN]	28.99	1	67	183	2715	298.181	5.47803	1.0533	1.28501	1.11226	1.15019	1.04596	0.96476	1.14473	1.05182	1.09353	0.320617
P04275	von Willebrand factor OS=Homo sapiens GN=VWF PE=1 SV=4 - [VWF_HUMAN]	28.65	2	68	183	2813	309.058	5.47803	0.95136	1.33387	0.536227	0.940487	0.92685	1.27284	0.943353	1.04768	0.897683	0.697371
B1AHL2	Fibulin-1 OS=Homo sapiens GN=FBLN1 PE=1 SV=1 - [B1AHL2_HUMAN]	29.96	1	16	119	721	78.2769	5.38916	0.880882	0.908799	1.11988	0.969853	1.17372	0.885932	1.06138	1.04035	0.932242	0.565616
B2R582	cDNA, FLJ92374, highly similar to Homo sapiens C-type lectin domain family 3, member B (CLEC3B), mRNA OS=Homo sapiens PE=2 SV=1 - [B2R582_HUMAN]	69.8	1	11	126	202	22.5223	6.03662	0.965829	0.90945	0.959592	0.944957	1.24086	1.08322	0.962662	1.09558	0.862519	0.141927
P07225	Vitamin K-dependent protein S OS=Homo sapiens GN=PROS1 PE=1 SV=1 - [PROS_HUMAN]	40.09	1	23	202	676	75.0739	5.66846	0.976236	1.16669	0.876651	1.00653	1.17318	0.995388	1.15265	1.10707	0.909178	0.379835
Q16610	Extracellular matrix protein 1 OS=Homo sapiens GN=ECM1 PE=1 SV=2 - [ECM1_HUMAN]	58.89	25	25	179	540	60.6353	6.7124	0.970683	0.99606	1.00754	0.991428	1.11837	0.948472	0.995933	1.02092	0.971109	0.599319
P05452	Tetranectin OS=Homo sapiens GN=CLEC3B PE=1 SV=3 - [TETN_HUMAN]	72.77	2	12	117	202	22.5223	5.66846	1.2523	0.82564	1.2826	1.12018	0.438812	0.574687	0.883371	0.63229	1.77163	0.0690574
Q4TZM4	Hemoglobin beta chain (Fragment) OS=Homo sapiens GN=HBB PE=3 SV=1 - [Q4TZM4_HUMAN]	89.11	1	7	93	101	11.0156	6.52197	1.18884	1.65749	0.349585	1.06531	0.780469	1.55269	2.87172	1.73496	0.614023	0.405275
P63104	14-3-3 protein zeta/delta OS=Homo sapiens GN=YWHAZ PE=1 SV=1 - [1433Z_HUMAN]	75.51	13	19	134	245	27.7277	4.79248	1.12397	0.950092	1.20782	1.09396	0.545465	0.995824	0.915221	0.818836	1.33599	0.156735
Q16519	Protein S (Fragment) OS=Homo sapiens GN=PROS1 PE=4 SV=1 - [Q16519_HUMAN]	41.69	1	23	189	650	72.4155	5.73193	0.98242	1.1761	0.829026	0.995848	1.13115	0.993598	1.35312	1.15929	0.859015	0.322984
Q6MZU6	Uncharacterized protein DKFZp686C15213 OS=Homo sapiens GN=DKFZp686C15213 PE=2 SV=1 - [Q6MZU6_HUMAN]	18.1	2	8	120	464	51.0662	7.7085	1.01271	2.07531	0.513793	1.20061	1.23641	1.0311	1.25442	1.17398	1.02269	0.957167
P00742	Coagulation factor X OS=Homo sapiens GN=F10 PE=1 SV=2 - [FA10_HUMAN]	33.2	16	17	125	488	54.6965	5.93506	0.978308	0.931253	1.02394	0.977833	1.12582	0.960987	1.00136	1.02939	0.949914	0.412053
C9JVG0	Serotransferrin (Fragment) OS=Homo sapiens GN=TF PE=1 SV=1 - [C9JVG0_HUMAN]	56.72	1	9	129	134	14.681	7.13721	1.19139	2.24284	0.872236	1.43549	0.435248	0.388492	0.353867	0.392535	3.65697	0.0657204
P80108	Phosphatidylinositol-glycan-specific phospholipase D OS=Homo sapiens GN=GPLD1 PE=1 SV=3 - [PHLD_HUMAN]	36.07	23	23	110	840	92.278	6.3667	1.08061	0.883473	0.960745	0.974943	1.11886	0.92799	0.966095	1.00432	0.970753	0.737667
P67936	Tropomyosin alpha-4 chain OS=Homo sapiens GN=TPM4 PE=1 SV=3 - [TPM4_HUMAN]	62.5	7	22	148	248	28.5045	4.69092	1.0673	0.965321	1.18573	1.07278	0.553279	0.96027	0.912697	0.808749	1.32647	0.139375
P03951	Coagulation factor XI OS=Homo sapiens GN=F11 PE=1 SV=1 - [FA11_HUMAN]	48.48	27	27	129	625	70.0636	8.104	0.977074	0.971766	0.971993	0.973611	1.06148	0.979481	1.04409	1.02835	0.946768	0.0937866
P37802	Transgelin-2 OS=Homo sapiens GN=TAGLN2 PE=1 SV=3 - [TAGL2_HUMAN]	83.42	13	13	75	199	22.3772	8.25049	1.08678	0.97747	1.13047	1.06491	0.532897	1.04816	0.915313	0.832124	1.27975	0.221778
D6RE86	Ceruloplasmin (Fragment) OS=Homo sapiens GN=CP PE=1 SV=8 - [D6RE86_HUMAN]	40.45	1	6	150	178	20.7486	7.23975	0.972834	0.989665	0.947171	0.96989	1.12315	0.971868	1.09543	1.06348	0.911993	0.123633
F2RM37	Coagulation factor IX OS=Homo sapiens GN=F9 p22 PE=2 SV=1 - [F2RM37_HUMAN]	40.13	14	15	91	461	51.711	5.46533	0.98844	0.915921	0.928015	0.944125	1.16106	0.967275	1.07734	1.06856	0.883551	0.108559
P02652	Apolipoprotein A-II OS=Homo sapiens GN=APOA2 PE=1 SV=1 - [APOA2_HUMAN]	64	7	7	100	100	11.1679	6.62451	1.44941	2.34853	0.666075	1.488	0.846381	0.762335	0.680901	0.763206	1.94968	0.21197
P07737	Profilin-1 OS=Homo sapiens GN=PFN1 PE=1 SV=2 - [PROF1_HUMAN]	77.14	8	8	105	140	15.0446	8.26514	1.11793	0.906836	1.13872	1.05449	0.560023	1.05491	0.919417	0.844784	1.24824	0.273103
O43866	CD5 antigen-like OS=Homo sapiens GN=CD5L PE=1 SV=1 - [CD5L_HUMAN]	58.79	19	19	104	347	38.0629	5.46533	1.31312	1.27621	0.663562	1.0843	1.16966	1.26465	1.21357	1.21596	0.891721	0.568932
Q14520	Hyaluronan-binding protein 2 OS=Homo sapiens GN=HABP2 PE=1 SV=1 - [HABP2_HUMAN]	26.07	15	15	173	560	62.6304	6.53662	1.0197	0.930961	0.924427	0.958364	1.16934	0.961941	1.03332	1.05486	0.908519	0.229726
P48740	Mannan-binding lectin serine protease 1 OS=Homo sapiens GN=MASP1 PE=1 SV=3 - [MASP1_HUMAN]	34.05	18	19	105	699	79.1952	5.49072	0.944558	0.901979	0.94257	0.929703	1.16387	0.983162	0.893207	1.01341	0.917397	0.358631
K7ER74	APOC4-APOC2 readthrough (NMD candidate) OS=Homo sapiens GN=APOC4-APOC2 PE=1 SV=1 - [K7ER74_HUMAN]	33.15	4	5	78	178	20.0363	6.63916	1.86307	0.90191	1.17868	1.31455	0.851903	0.763897	0.655304	0.757035	1.73645	0.128132
Q86UX7	Fermitin family homolog 3 OS=Homo sapiens GN=FERMT3 PE=1 SV=1 - [URP2_HUMAN]	49.48	27	27	113	667	75.905	6.97607	1.06938	0.899854	1.21235	1.06053	0.598096	1.08013	0.877697	0.851973	1.24479	0.27832
E1B4S9	Apolipoprotein B (Fragment) OS=Homo sapiens GN=APOB PE=4 SV=1 - [E1B4S9_HUMAN]	50.9	1	11	140	222	26.3018	5.61768	1.09107	1.1149	1.07098	1.09231	1.1537	0.857971	0.870298	0.960656	1.13705	0.247916
V9GYE7	Complement factor H-related protein 2 OS=Homo sapiens GN=CFHR2 PE=1 SV=1 - [V9GYE7_HUMAN]	46.85	5	10	117	254	28.8929	6.81494	0.854728	0.962018	1.0716	0.962781	1.27235	1.03893	0.997092	1.10279	0.87304	0.257348
Q562R1	Beta-actin-like protein 2 OS=Homo sapiens GN=ACTBL2 PE=1 SV=2 - [ACTBL_HUMAN]	16.76	1	5	113	376	41.976	5.59229	1.02211	0.944754	1.11204	1.0263	0.834547	1.00012	1.00961	0.948091	1.08249	0.353692
P07195	L-lactate dehydrogenase B chain OS=Homo sapiens GN=LDHB PE=1 SV=2 - [LDHB_HUMAN]	44.61	12	13	70	334	36.6151	6.04932	1.20171	0.814485	1.13444	1.05021	0.73076	1.01379	0.983492	0.909348	1.15491	0.399125
P26927	Hepatocyte growth factor-like protein OS=Homo sapiens GN=MST1 PE=1 SV=2 - [HGFL_HUMAN]	49.51	20	26	106	711	80.2675	7.6792	0.974936	0.923608	0.962766	0.95377	1.04844	0.976254	0.969158	0.997951	0.955728	0.210908
P07996	Thrombospondin-1 OS=Homo sapiens GN=THBS1 PE=1 SV=2 - [TSP1_HUMAN]	35.38	1	36	102	1170	129.3	4.94482	1.28938	0.67822	0.736081	0.901227	0.358708	1.25027	1.04888	0.885956	1.01724	0.965611
A0A024R9Q1	Thrombospondin 1, isoform CRA_a OS=Homo sapiens GN=THBS1 PE=4 SV=1 - [A0A024R9Q1_HUMAN]	35.38	1	36	101	1170	129.27	4.94482	0.754172	0.89906	1.32336	0.992198	0.759336	0.467345	0.795956	0.674212	1.47164	0.186955
P02042	Hemoglobin subunit delta OS=Homo sapiens GN=HBD PE=1 SV=2 - [HBD_HUMAN]	74.15	4	10	66	147	16.0453	8.04541	1.22213	1.75065	0.467733	1.14684	0.817685	1.27974	2.42429	1.50724	0.760888	0.583734
Q9UK55	Protein Z-dependent protease inhibitor OS=Homo sapiens GN=SERPINA10 PE=1 SV=1 - [ZPI_HUMAN]	44.37	2	17	81	444	50.6742	8.26514	0.994763	0.969739	0.784539	0.916347	0.947029	1.32116	1.3667	1.21163	0.756293	0.117779
B2RBZ5	cDNA, FLJ95778, highly similar to Homo sapiens serpin peptidase inhibitor, clade A (alpha-1 antiproteinase, antitrypsin), member 10 (SERPINA10), mRNA OS=Homo sapiens PE=2 SV=1 - [B2RBZ5_HUMAN]	42.12	1	16	80	444	50.6422	8.51416	0.998738	0.959013	0.97694	0.97823	1.24945	1.02751	0.950231	1.07573	0.909365	0.341541
Q9Y4G6	Talin-2 OS=Homo sapiens GN=TLN2 PE=1 SV=4 - [TLN2_HUMAN]	8.14	2	23	83	2542	271.443	5.56689	0.944546	0.88555	1.14053	0.99021	0.582346	0.984498	0.937944	0.834929	1.18598	0.35491
P05154	Plasma serine protease inhibitor OS=Homo sapiens GN=SERPINA5 PE=1 SV=3 - [IPSP_HUMAN]	33.25	14	14	95	406	45.6457	9.26123	0.434623	1.00194	1.07075	0.835773	1.14881	1.07106	1.09594	1.10527	0.756171	0.254733
A0A0R7FJH5	Coagulation factor XII OS=Homo sapiens GN=F12 PE=3 SV=1 - [A0A0R7FJH5_HUMAN]	44.55	1	25	136	615	67.8169	7.79639	1.15263	0.74702	1.05469	0.984779	1.03566	1.11288	0.978532	1.04236	0.94476	0.676699
A0A024CIM4	Carboxylic ester hydrolase OS=Homo sapiens PE=3 SV=1 - [A0A024CIM4_HUMAN]	27.74	17	17	86	602	68.3902	7.21045	0.945961	1.00857	1.06679	1.00711	1.04971	0.906804	0.92798	0.961499	1.04744	0.465286
P02747	Complement C1q subcomponent subunit C OS=Homo sapiens GN=C1QC PE=1 SV=3 - [C1QC_HUMAN]	25.31	5	5	48	245	25.7571	8.41162	1.10299	0.66095	0.899784	0.88791	1.20301	1.46457	1.1374	1.26833	0.700065	0.0789014
P15169	Carboxypeptidase N catalytic chain OS=Homo sapiens GN=CPN1 PE=1 SV=1 - [CBPN_HUMAN]	38.86	13	13	97	458	52.2533	7.34229	0.976224	0.958832	0.935526	0.956861	1.10861	0.975503	0.946741	1.01028	0.947121	0.355939
P43251	Biotinidase OS=Homo sapiens GN=BTD PE=1 SV=2 - [BTD_HUMAN]	23.39	10	10	62	543	61.0933	6.25244	1.06037	0.899437	0.97488	0.97823	1.10842	0.926631	0.952706	0.995919	0.982239	0.821319
P05090	Apolipoprotein D OS=Homo sapiens GN=APOD PE=1 SV=1 - [APOD_HUMAN]	33.33	7	7	71	189	21.2618	5.14795	1.20505	1.27481	0.932663	1.13751	1.03296	0.918987	0.918622	0.956855	1.1888	0.179274
P04075	Fructose-bisphosphate aldolase A OS=Homo sapiens GN=ALDOA PE=1 SV=2 - [ALDOA_HUMAN]	50.82	15	20	85	364	39.3953	8.08936	1.08613	0.92663	1.12051	1.04442	0.659422	1.00169	0.90202	0.854376	1.22244	0.182223
O43707	Alpha-actinin-4 OS=Homo sapiens GN=ACTN4 PE=1 SV=2 - [ACTN4_HUMAN]	28.54	9	25	89	911	104.788	5.43994	1.06774	1.0062	1.18659	1.08685	0.58701	0.908972	1.03941	0.84513	1.28601	0.169663
Q9Y6R7	IgGFc-binding protein OS=Homo sapiens GN=FCGBP PE=1 SV=3 - [FCGBP_HUMAN]	12.12	38	38	90	5405	571.639	5.33838	0.868602	0.959934	0.945773	0.92477	1.31335	0.885113	1.03712	1.07853	0.857437	0.297603
A0A1S5UZ39	Hemoglobin subunit alpha OS=Homo sapiens GN=HBA2 PE=2 SV=1 - [A0A1S5UZ39_HUMAN]	73.8	7	9	75	187	20.1333	8.89502	1.27793	1.98844	0.287972	1.18478	0.744041	1.33402	2.82105	1.63304	0.725505	0.601009
B2RA39	cDNA, FLJ94686, highly similar to Homo sapiens complement factor H-related 5 (CFHL5), mRNA OS=Homo sapiens PE=2 SV=1 - [B2RA39_HUMAN]	24.78	14	15	78	569	64.349	7.06396	0.831692	0.983633	1.00055	0.938624	1.16071	0.894588	1.07473	1.04334	0.899632	0.332325
P23528	Cofilin-1 OS=Homo sapiens GN=CFL1 PE=1 SV=3 - [COF1_HUMAN]	78.31	14	15	75	166	18.4907	8.08936	1.11456	0.900705	1.21598	1.07708	0.548183	1.06539	0.872818	0.828798	1.29957	0.233853
P13796	Plastin-2 OS=Homo sapiens GN=LCP1 PE=1 SV=6 - [PLSL_HUMAN]	47.69	20	25	77	627	70.2439	5.42725	0.979446	0.953802	0.986357	0.973202	1.02987	1.01277	0.99481	1.01249	0.9612	0.050123
S6AWF4	IgG L chain OS=Homo sapiens PE=2 SV=1 - [S6AWF4_HUMAN]	32.78	1	5	43	180	19.83	7.09326	0.852388	1.63471	0.853406	1.1135	0.776871	1.34121	1.09873	1.07227	1.03845	0.899855
Q04756	Hepatocyte growth factor activator OS=Homo sapiens GN=HGFAC PE=1 SV=1 - [HGFA_HUMAN]	26.56	16	16	94	655	70.6361	7.23975	0.979935	0.899678	1.01964	0.966418	1.10623	0.964072	0.887861	0.986054	0.980087	0.801438
M0R2W8	N-acetylmuramoyl-L-alanine amidase (Fragment) OS=Homo sapiens GN=PGLYRP2 PE=1 SV=2 - [M0R2W8_HUMAN]	30.94	1	3	35	181	19.5322	6.66846	0.926522	0.823708	0.841418	0.863883	0.969229	1.21849	0.856742	1.01482	0.851267	0.247261
P11021	78 kDa glucose-regulated protein OS=Homo sapiens GN=HSPA5 PE=1 SV=2 - [GRP78_HUMAN]	46.18	23	26	83	654	72.2884	5.16064	1.03967	0.933674	1.12053	1.03129	0.758188	0.948848	0.949562	0.885533	1.1646	0.15602
P11226	Mannose-binding protein C OS=Homo sapiens GN=MBL2 PE=1 SV=2 - [MBL2_HUMAN]	43.15	9	9	62	248	26.127	5.49072	0.868669	0.949413	0.913114	0.910399	1.16146	0.959521	1.00766	1.04288	0.872967	0.112045
K7ENT6	Tropomyosin alpha-4 chain (Fragment) OS=Homo sapiens GN=TPM4 PE=1 SV=1 - [K7ENT6_HUMAN]	69.27	1	15	93	179	20.6084	4.61475	1.08437	0.947731	1.29266	1.10825	0.540573	0.863574	0.915821	0.773323	1.43311	0.0958368
Q6U2L6	C4B (Fragment) OS=Homo sapiens GN=C4B PE=4 SV=1 - [Q6U2L6_HUMAN]	76	1	6	96	100	10.2462	6.52197	1.05961	0.830036	1.03746	0.9757	1.16342	0.786671	1.01443	0.988172	0.987378	0.929108
S6BGD4	IgG H chain OS=Homo sapiens PE=2 SV=1 - [S6BGD4_HUMAN]	17.09	1	3	31	234	24.9997	9.48096	0.867532	2.37105	0.433146	1.22391	1.08871	1.31104	1.78925	1.39633	0.876517	0.795495
P14618	Pyruvate kinase PKM OS=Homo sapiens GN=PKM PE=1 SV=4 - [KPYM_HUMAN]	59.32	26	26	69	531	57.9	7.84033	1.03067	0.892935	1.12681	1.01681	0.617412	1.09229	0.866899	0.858866	1.18389	0.360314
A0A0U1RR20	Proteoglycan 4 OS=Homo sapiens GN=PRG4 PE=1 SV=1 - [A0A0U1RR20_HUMAN]	19.25	27	27	127	1361	146.361	9.46631	0.99587	0.913234	0.923122	0.944075	1.04357	0.952125	0.994933	0.996876	0.947034	0.227796
P08567	Pleckstrin OS=Homo sapiens GN=PLEK PE=1 SV=3 - [PLEK_HUMAN]	39.14	10	10	60	350	40.0994	8.27979	1.13542	0.986083	1.17175	1.09775	0.578637	1.0342	0.8913	0.834713	1.31513	0.146009
P0CG39	POTE ankyrin domain family member J OS=Homo sapiens GN=POTEJ PE=3 SV=1 - [POTEJ_HUMAN]	6.07	1	5	42	1038	117.315	5.97314	1.0979	0.948826	1.221	1.08924	0.794963	1.1572	0.927703	0.959955	1.13468	0.382351
Q6FHW3	DF protein OS=Homo sapiens GN=DF PE=2 SV=1 - [Q6FHW3_HUMAN]	58.33	9	9	41	228	24.4074	7.23975	0.940549	1.01033	0.943739	0.964873	1.24053	1.00993	1.15884	1.13643	0.849036	0.0736866
P62258	14-3-3 protein epsilon OS=Homo sapiens GN=YWHAE PE=1 SV=1 - [1433E_HUMAN]	46.27	8	11	50	255	29.1554	4.7417	1.11446	0.938422	1.14441	1.06576	0.597662	0.993287	0.974305	0.855084	1.24638	0.217189
P00748	Coagulation factor XII OS=Homo sapiens GN=F12 PE=1 SV=3 - [FA12_HUMAN]	44.55	1	25	124	615	67.7479	7.73779	0.651275	1.18132	1.36177	1.06479	1.22066	0.584852	1.21789	1.0078	1.05654	0.858739
I3L145	Sex hormone-binding globulin OS=Homo sapiens GN=SHBG PE=1 SV=1 - [I3L145_HUMAN]	55.52	14	14	71	344	37.4643	6.22705	1.00498	0.806116	0.951003	0.920699	1.18404	1.05832	0.829581	1.02398	0.899136	0.436323
Q9H804	cDNA FLJ14022 fis, clone HEMBA1003538, weakly similar to COMPLEMENT C1R COMPONENT (EC 3.4.21.41) OS=Homo sapiens PE=2 SV=1 - [Q9H804_HUMAN]	26.71	1	11	69	438	47.9638	7.45947	1.00731	0.707437	0.963212	0.892653	1.01383	1.40722	1.13196	1.18434	0.753714	0.122621
B2R888	Monocyte differentiation antigen CD14 OS=Homo sapiens PE=2 SV=1 - [B2R888_HUMAN]	36.27	11	11	51	375	40.0227	6.22705	0.960327	0.922961	0.955005	0.946098	1.09427	0.940043	1.02913	1.02115	0.926505	0.179586
B4E1C4	cDNA FLJ51179, highly similar to Vitamin K-dependent protein C (EC 3.4.21.69) OS=Homo sapiens PE=2 SV=1 - [B4E1C4_HUMAN]	32.07	11	11	52	421	46.0296	7.92822	0.993735	0.91147	1.05715	0.987452	1.04426	0.914135	0.932347	0.963581	1.02477	0.704576
S6B2A6	IgG H chain OS=Homo sapiens PE=2 SV=1 - [S6B2A6_HUMAN]	16.67	1	5	41	300	32.1469	7.25439	0.894562	1.07789	0.844582	0.939011	1.06824	1.48638	0.970872	1.17516	0.799046	0.244665
P00915	Carbonic anhydrase 1 OS=Homo sapiens GN=CA1 PE=1 SV=2 - [CAH1_HUMAN]	59.39	5	12	73	261	28.8524	7.12256	1.0772	0.942924	0.812862	0.944329	1.02854	1.07409	1.33604	1.14622	0.823863	0.174652
A8K2W3	cDNA FLJ78516 OS=Homo sapiens PE=2 SV=1 - [A8K2W3_HUMAN]	39.76	16	16	60	425	47.0726	5.24951	1.10453	0.92291	1.24826	1.0919	0.522909	0.928839	0.900363	0.784037	1.39267	0.128717
Q9UL78	Myosin-reactive immunoglobulin light chain variable region (Fragment) OS=Homo sapiens PE=1 SV=1 - [Q9UL78_HUMAN]	39.45	1	3	31	109	11.6388	8.29443	1.06494	1.77078	0.72218	1.18597	1.16426	1.05334	1.29642	1.17134	1.01249	0.965361
V9HW25	Epididymis secretory protein Li 273 OS=Homo sapiens GN=HEL-S-273 PE=2 SV=1 - [V9HW25_HUMAN]	53.17	7	20	83	284	32.9696	4.66553	1.0844	1.00995	1.30451	1.13295	0.54733	0.990269	1.19261	0.910069	1.24491	0.348491
O75636	Ficolin-3 OS=Homo sapiens GN=FCN3 PE=1 SV=2 - [FCN3_HUMAN]	48.83	12	12	59	299	32.882	6.66846	1.0201	0.905121	1.04262	0.989279	1.1825	1.15805	0.922382	1.08764	0.909561	0.35087
P26038	Moesin OS=Homo sapiens GN=MSN PE=1 SV=3 - [MOES_HUMAN]	48.53	25	34	87	577	67.7778	6.40479	1.08838	0.938028	1.20659	1.07767	0.588531	0.98325	0.855172	0.808984	1.33212	0.12708
A2KBC6	Anti-FactorVIII scFv (Fragment) OS=Homo sapiens PE=2 SV=1 - [A2KBC6_HUMAN]	26.05	1	5	37	238	24.9542	8.41162	1.0686	1.67336	0.732255	1.15807	1.24733	1.135	1.53412	1.30548	0.887084	0.648781
P11142	Heat shock cognate 71 kDa protein OS=Homo sapiens GN=HSPA8 PE=1 SV=1 - [HSP7C_HUMAN]	41.02	19	24	70	646	70.8542	5.51611	1.04643	0.917385	1.15847	1.04076	0.611333	0.984304	0.992685	0.862774	1.20629	0.283347
Q0ZCH9	Immunglobulin heavy chain variable region (Fragment) OS=Homo sapiens PE=4 SV=1 - [Q0ZCH9_HUMAN]	47.11	1	5	42	121	13.4275	8.45557	1.19789	2.05895	0.488022	1.24829	1.46607	1.10894	1.52007	1.36503	0.914478	0.816884
P22891	Vitamin K-dependent protein Z OS=Homo sapiens GN=PROZ PE=1 SV=2 - [PROZ_HUMAN]	32.25	11	11	55	400	44.7147	5.97314	1.08629	0.96092	0.938802	0.995337	0.987464	0.888789	1.00223	0.959495	1.03736	0.570744
P27918	Properdin OS=Homo sapiens GN=CFP PE=1 SV=2 - [PROP_HUMAN]	35.82	15	15	80	469	51.242	7.89893	0.899942	0.912188	0.975093	0.929074	1.02205	1.25351	0.984779	1.08678	0.854889	0.144865
Q96IY4	Carboxypeptidase B2 OS=Homo sapiens GN=CPB2 PE=1 SV=2 - [CBPB2_HUMAN]	38.3	15	15	68	423	48.3934	7.7085	0.941223	0.856851	0.909496	0.902524	1.2845	0.98798	1.02391	1.0988	0.821374	0.112021
P20851	C4b-binding protein beta chain OS=Homo sapiens GN=C4BPB PE=1 SV=1 - [C4BPB_HUMAN]	44.84	10	10	64	252	28.3384	5.13525	1.09456	1.26153	0.590531	0.982206	1.47534	1.24635	1.342	1.35456	0.725111	0.154358
P19652	Alpha-1-acid glycoprotein 2 OS=Homo sapiens GN=ORM2 PE=1 SV=2 - [A1AG2_HUMAN]	31.84	4	6	51	201	23.5876	5.10986	1.1416	4.41071	0.438831	1.99705	0.683642	0.60673	0.581918	0.624097	3.1999	0.324829
Q1HP67	Lipoprotein, Lp(A) OS=Homo sapiens GN=LPA PE=3 SV=1 - [Q1HP67_HUMAN]	29.12	21	21	57	2040	226.369	6.07471	1.26652	0.830249	1.08118	1.05932	0.588799	0.534498	1.53598	0.886424	1.19504	0.646177
O75083	WD repeat-containing protein 1 OS=Homo sapiens GN=WDR1 PE=1 SV=4 - [WDR1_HUMAN]	30.53	1	20	61	606	66.1519	6.65381	0.905748	1.00178	1.00148	0.969666	0.876481	1.13482	1.12501	1.04544	0.927523	0.448941
P07900	Heat shock protein HSP 90-alpha OS=Homo sapiens GN=HSP90AA1 PE=1 SV=5 - [HS90A_HUMAN]	29.92	9	22	56	732	84.6067	5.021	1.0648	1.01865	1.114	1.06582	0.688913	0.986249	1.02408	0.899746	1.18457	0.203951
G3XAP6	Cartilage oligomeric matrix protein OS=Homo sapiens GN=COMP PE=1 SV=1 - [G3XAP6_HUMAN]	41.02	22	23	46	724	79.646	4.61475	1.0243	0.957161	1.05138	1.01095	1.0071	0.99388	0.949075	0.983353	1.02806	0.450787
B3KQT9	Protein disulfide-isomerase OS=Homo sapiens PE=2 SV=1 - [B3KQT9_HUMAN]	45.63	16	21	59	480	54.0685	7.21045	1.10743	0.944323	1.19187	1.08121	0.619236	0.980741	0.974649	0.858209	1.25984	0.186044
B7Z7M2	cDNA FLJ51564, highly similar to Pregnancy zone protein OS=Homo sapiens PE=2 SV=1 - [B7Z7M2_HUMAN]	50.74	1	7	44	136	14.9596	5.10986	1.24702	1.40289	0.896446	1.18212	0.738741	0.790775	1.03399	0.854501	1.3834	0.13489
A6XND1	Insulin-like growth factor binding protein 3 isoform b OS=Homo sapiens GN=IGFBP3 PE=1 SV=1 - [A6XND1_HUMAN]	42.21	10	10	69	263	28.9611	8.45557	0.997674	0.960662	1.00716	0.988498	1.12295	0.954934	0.955716	1.0112	0.977548	0.713808
P01591	Immunoglobulin J chain OS=Homo sapiens GN=JCHAIN PE=1 SV=4 - [IGJ_HUMAN]	59.12	6	6	37	159	18.087	5.23682	1.3627	1.57034	0.42276	1.1186	1.23606	1.44245	1.53831	1.40561	0.795812	0.474668
A0A109PW65	GCT-A3 light chain variable region (Fragment) OS=Homo sapiens PE=2 SV=1 - [A0A109PW65_HUMAN]	31.78	1	2	23	107	11.6197	8.47021	0.933901	2.00135	0.611675	1.18231	0.974106	1.06225	1.28113	1.10583	1.06916	0.8674
A0A0C4DFP6	Cartilage acidic protein 1 OS=Homo sapiens GN=CRTAC1 PE=1 SV=1 - [A0A0C4DFP6_HUMAN]	32.03	16	16	37	637	69.6632	5.2749	0.999418	1.16424	1.08939	1.08435	1.07091	0.919144	0.93976	0.976606	1.11033	0.184638
A0A087X1J7	Glutathione peroxidase OS=Homo sapiens GN=GPX3 PE=1 SV=1 - [A0A087X1J7_HUMAN]	28	6	6	46	225	25.386	8.1333	1.07623	0.920585	0.937654	0.978157	1.08155	1.02873	0.966903	1.02573	0.953622	0.467979
P00338	L-lactate dehydrogenase A chain OS=Homo sapiens GN=LDHA PE=1 SV=2 - [LDHA_HUMAN]	26.51	7	8	34	332	36.6654	8.26514	1.21006	0.856514	1.06284	1.04314	0.764465	1.06074	1.01296	0.946055	1.10262	0.519536
O00391	Sulfhydryl oxidase 1 OS=Homo sapiens GN=QSOX1 PE=1 SV=3 - [QSOX1_HUMAN]	34.81	24	24	62	747	82.5255	8.92432	0.924974	0.929392	0.958951	0.937772	1.1322	1.01721	0.961982	1.03713	0.904199	0.124613
Q9UL70	Myosin-reactive immunoglobulin light chain variable region (Fragment) OS=Homo sapiens PE=2 SV=1 - [Q9UL70_HUMAN]	23.15	1	2	24	108	11.6258	9.36377	1.11705	2.51073	0.372322	1.33337	1.17749	0.985809	1.88776	1.35035	0.98742	0.981379
D3DPU2	Adenylyl cyclase-associated protein OS=Homo sapiens GN=CAP1 PE=2 SV=1 - [D3DPU2_HUMAN]	42.11	5	18	60	475	51.6406	8.01611	1.07316	0.918392	1.16802	1.05319	0.602381	1.00357	0.927207	0.844386	1.24729	0.217757
P52566	Rho GDP-dissociation inhibitor 2 OS=Homo sapiens GN=ARHGDIB PE=1 SV=3 - [GDIR2_HUMAN]	65.17	10	10	44	201	22.9736	5.21143	1.17263	0.922319	1.15298	1.08264	0.64436	1.01961	0.914252	0.859408	1.25975	0.180149
U3PXP0	Alpha globin chain (Fragment) OS=Homo sapiens GN=HBA2 PE=3 SV=1 - [U3PXP0_HUMAN]	66.67	1	3	33	51	5.69882	7.51807	0.820833	1.4426	0.807574	1.02367	1.05403	1.0202	1.53997	1.20473	0.849706	0.537024
P00918	Carbonic anhydrase 2 OS=Homo sapiens GN=CA2 PE=1 SV=2 - [CAH2_HUMAN]	45.77	11	11	41	260	29.2279	7.40088	1.10801	0.894494	1.00042	1.00098	0.869528	0.997557	1.19323	1.0201	0.981249	0.87325
P04040	Catalase OS=Homo sapiens GN=CAT PE=1 SV=3 - [CATA_HUMAN]	42.13	19	19	53	527	59.7188	7.38623	1.10738	0.970776	0.930322	1.00283	0.99663	0.928668	1.22472	1.05001	0.955067	0.674559
P19320	Vascular cell adhesion protein 1 OS=Homo sapiens GN=VCAM1 PE=1 SV=1 - [VCAM1_HUMAN]	25.17	18	18	43	739	81.2243	5.22412	0.918852	0.902031	0.968441	0.929775	1.25528	0.965299	0.895108	1.03856	0.895252	0.386488
P02763	Alpha-1-acid glycoprotein 1 OS=Homo sapiens GN=ORM1 PE=1 SV=1 - [A1AG1_HUMAN]	40.3	5	7	57	201	23.4968	5.021	0.837608	5.46166	0.35557	2.21828	0.43242	0.38473	0.459541	0.425564	5.21257	0.332575
B4DF70	cDNA FLJ60461, highly similar to Peroxiredoxin-2 (EC 1.11.1.15) OS=Homo sapiens PE=2 SV=1 - [B4DF70_HUMAN]	43.72	8	9	47	183	20.0946	8.77783	1.00254	0.859136	0.824674	0.89545	1.0574	0.926274	1.33661	1.10676	0.809072	0.186484
P33151	Cadherin-5 OS=Homo sapiens GN=CDH5 PE=1 SV=5 - [CADH5_HUMAN]	16.71	13	13	47	784	87.474	5.42725	0.870882	0.94005	1.08933	0.966753	1.05864	0.98404	0.875048	0.972576	0.994013	0.947844
V9HWK1	Triosephosphate isomerase OS=Homo sapiens GN=HEL-S-49 PE=2 SV=1 - [V9HWK1_HUMAN]	68.67	15	15	43	249	26.6527	6.90283	1.07985	0.916788	1.10636	1.03433	0.670962	1.05623	0.973968	0.900388	1.14876	0.365295
S4R460	Immunoglobulin heavy variable 3/OR16-9 (non-functional) OS=Homo sapiens GN=IGHV3OR16-9 PE=1 SV=2 - [S4R460_HUMAN]	40.63	1	3	23	96	10.423	7.97217	0.931083	1.64599	0.91877	1.16528	0.945552	1.05645	1.18834	1.06344	1.09576	0.705069
Q5CAQ5	Tumor rejection antigen (Gp96) 1 OS=Homo sapiens GN=TRA1 PE=2 SV=1 - [Q5CAQ5_HUMAN]	28.43	21	22	52	802	92.2823	4.85596	1.01857	0.911826	1.13029	1.02023	0.881357	0.919748	1.00836	0.936489	1.08942	0.317764
P00558	Phosphoglycerate kinase 1 OS=Homo sapiens GN=PGK1 PE=1 SV=3 - [PGK1_HUMAN]	43.17	16	16	34	417	44.5861	8.104	1.11395	1.00096	1.08725	1.06739	0.624285	1.02051	0.933513	0.859434	1.24197	0.17143
Q5T123	SH3 domain-binding glutamic acid-rich-like protein 3 OS=Homo sapiens GN=SH3BGRL3 PE=1 SV=1 - [Q5T123_HUMAN]	50	5	5	36	88	9.37476	9.36377	1.26567	1.02886	1.21806	1.17086	0.506143	0.972456	0.89305	0.79055	1.48108	0.0776922
A0A0X9UWL5	GCT-A5 light chain variable region (Fragment) OS=Homo sapiens PE=2 SV=1 - [A0A0X9UWL5_HUMAN]	40.71	1	4	28	113	12.4601	6.58057	1.00119	2.45609	0.56404	1.34044	1.10195	1.01776	1.60461	1.24144	1.07974	0.877062
B4DQA0	L-selectin OS=Homo sapiens PE=2 SV=1 - [B4DQA0_HUMAN]	21.85	8	8	51	325	36.3182	6.22705	0.990268	1.02342	1.00745	1.00704	1.10385	0.948	0.941515	0.997789	1.00927	0.872063
A8K486	Peptidyl-prolyl cis-trans isomerase OS=Homo sapiens PE=2 SV=1 - [A8K486_HUMAN]	59.39	10	11	58	165	18.0018	6.90283	1.10756	0.917353	1.17433	1.06642	0.617092	1.02739	0.970424	0.871635	1.22347	0.26296
B7Z538	cDNA FLJ60766, highly similar to Hepatocyte growth factor-like protein OS=Homo sapiens PE=2 SV=1 - [B7Z538_HUMAN]	29.88	1	7	25	338	36.789	8.48486	0.999746	0.875498	0.963837	0.94636	1.17754	0.840258	0.964392	0.994062	0.952013	0.673683
Q8NF20	FLJ00382 protein (Fragment) OS=Homo sapiens GN=FLJ00382 PE=2 SV=1 - [Q8NF20_HUMAN]	24.07	1	8	35	482	52.8916	8.66064	0.632085	4.89364	0.277512	1.93441	0.647248	0.917791	0.798182	0.787741	2.45565	0.483161
B4DRR0	cDNA FLJ53910, highly similar to Keratin, type II cytoskeletal 6A OS=Homo sapiens PE=2 SV=1 - [B4DRR0_HUMAN]	32.34	7	20	50	535	57.8032	8.00146	0.995196	0.719847	1.06468	0.926573	1.12514	0.9857	1.30639	1.13908	0.813442	0.204629
P61981	14-3-3 protein gamma OS=Homo sapiens GN=YWHAG PE=1 SV=2 - [1433G_HUMAN]	59.92	9	14	48	247	28.2849	4.89404	1.06678	0.980849	1.20823	1.08529	0.552637	0.996978	0.948685	0.832767	1.30323	0.1799
Q9UL72	Myosin-reactive immunoglobulin heavy chain variable region (Fragment) OS=Homo sapiens PE=2 SV=1 - [Q9UL72_HUMAN]	25.42	1	2	22	118	12.8642	6.58057	0.820789	2.97395	0.442956	1.41256	0.850227	1.20564	1.81813	1.29133	1.09388	0.891896
H7BYY1	Tropomyosin 1 (Alpha), isoform CRA_m OS=Homo sapiens GN=TPM1 PE=1 SV=1 - [H7BYY1_HUMAN]	50.81	6	15	39	248	28.7296	4.81787	1.06194	1.04809	1.1479	1.08598	0.513483	0.973224	1.00732	0.831343	1.30629	0.191673
F5GZZ9	Scavenger receptor cysteine-rich type 1 protein M130 OS=Homo sapiens GN=CD163 PE=1 SV=1 - [F5GZZ9_HUMAN]	17.94	18	18	39	1109	120.244	6.1001	0.860334	1.00169	0.936687	0.932904	1.14962	1.02236	0.959075	1.04368	0.893857	0.185364
P0DOX3	Immunoglobulin delta heavy chain OS=Homo sapiens PE=1 SV=1 - [IGD_HUMAN]	22.85	1	8	33	512	56.1891	8.01611	0.85522	2.02854	0.714285	1.19935	1.20167	1.10771	1.22112	1.17684	1.01913	0.959637
O00151	PDZ and LIM domain protein 1 OS=Homo sapiens GN=PDLIM1 PE=1 SV=4 - [PDLI1_HUMAN]	26.14	9	9	25	329	36.049	7.02002	1.06404	0.901332	1.24654	1.07063	0.6288	0.986661	0.981388	0.865616	1.23685	0.25598
A0A1U9X8Y4	Chloride intracellular channel protein OS=Homo sapiens PE=3 SV=1 - [A0A1U9X8Y4_HUMAN]	52.5	9	9	27	240	26.7767	5.26221	1.14798	0.926585	1.15608	1.07688	0.635291	1.04986	0.893102	0.859418	1.25303	0.201272
B4DVE1	cDNA FLJ53478, highly similar to Galectin-3-binding protein OS=Homo sapiens PE=2 SV=1 - [B4DVE1_HUMAN]	23.73	12	12	40	573	64.0558	5.46533	1.05711	1.20648	0.806532	1.02338	1.07624	1.02261	0.912072	1.00364	1.01966	0.8834
A8KAJ3	cDNA FLJ77823, highly similar to Homo sapiens EGF-containing fibulin-like extracellular matrix protein 1, transcript variant 3, mRNA OS=Homo sapiens PE=2 SV=1 - [A8KAJ3_HUMAN]	38.74	15	15	40	493	54.6323	5.13525	0.827935	0.924486	0.986461	0.912961	1.1533	0.929498	1.08287	1.05522	0.865182	0.152224
J3KN67	Tropomyosin alpha-3 chain OS=Homo sapiens GN=TPM3 PE=1 SV=1 - [J3KN67_HUMAN]	47.37	1	18	65	285	33.2018	4.76709	1.07792	1.06828	1.20871	1.1183	0.615031	1.03021	0.971761	0.872335	1.28197	0.147991
P02745	Complement C1q subcomponent subunit A OS=Homo sapiens GN=C1QA PE=1 SV=2 - [C1QA_HUMAN]	23.27	4	4	32	245	26.0002	9.11475	1.09434	0.66428	0.89119	0.883268	1.2204	1.36295	1.14931	1.24422	0.709897	0.0604756
P06733	Alpha-enolase OS=Homo sapiens GN=ENO1 PE=1 SV=2 - [ENOA_HUMAN]	38.48	14	15	39	434	47.1393	7.38623	1.16516	1.01808	1.12814	1.10379	0.526014	1.12309	0.902896	0.850668	1.29756	0.232031
A0A024R5W6	Tropomyosin 1 (Alpha), isoform CRA_a OS=Homo sapiens GN=TPM1 PE=3 SV=1 - [A0A024R5W6_HUMAN]	44.37	4	16	42	284	32.6576	4.7417	1.14615	1.02364	1.1918	1.12053	0.58883	1.00644	0.975145	0.856806	1.3078	0.139686
Q15582	Transforming growth factor-beta-induced protein ig-h3 OS=Homo sapiens GN=TGFBI PE=1 SV=1 - [BGH3_HUMAN]	36.31	20	20	47	683	74.634	7.7085	0.963444	0.998814	0.907868	0.956709	1.22148	0.971743	0.973224	1.05548	0.906418	0.320226
B4DMA2	cDNA FLJ54023, highly similar to Heat shock protein HSP 90-beta OS=Homo sapiens PE=2 SV=1 - [B4DMA2_HUMAN]	24.2	3	17	38	686	79.1451	5.021	0.990139	0.93089	1.11001	1.01035	0.880697	0.992766	0.999692	0.957718	1.05495	0.465399
B4DNL5	Protein disulfide-isomerase OS=Homo sapiens PE=2 SV=1 - [B4DNL5_HUMAN]	41.67	19	20	42	492	55.3466	4.79248	1.03373	0.961337	1.14506	1.04671	0.693014	0.972085	1.00615	0.890415	1.17553	0.237657
P13647	Keratin, type II cytoskeletal 5 OS=Homo sapiens GN=KRT5 PE=1 SV=3 - [K2C5_HUMAN]	33.05	10	23	56	590	62.34	7.73779	0.910412	0.84672	1.1097	0.955612	0.968722	1.00967	0.984839	0.987745	0.967469	0.708808
P04406	Glyceraldehyde-3-phosphate dehydrogenase OS=Homo sapiens GN=GAPDH PE=1 SV=3 - [G3P_HUMAN]	40.3	10	10	37	335	36.0304	8.45557	1.17265	1.11477	1.07217	1.11986	0.628487	1.04956	0.96364	0.880562	1.27176	0.143406
P31946	14-3-3 protein beta/alpha OS=Homo sapiens GN=YWHAB PE=1 SV=3 - [1433B_HUMAN]	55.28	5	13	46	246	28.0648	4.83057	1.07505	0.884278	1.1671	1.04214	0.655781	1.0482	0.943736	0.882572	1.1808	0.329626
B4DNA3	Adenylyl cyclase-associated protein OS=Homo sapiens PE=2 SV=1 - [B4DNA3_HUMAN]	35.1	1	14	37	433	47.0913	8.27979	1.11347	1.35671	0.777326	1.0825	0.71313	1.05737	1.61212	1.12754	0.960053	0.89189
P09172	Dopamine beta-hydroxylase OS=Homo sapiens GN=DBH PE=1 SV=3 - [DOPO_HUMAN]	32.41	16	16	32	617	69.0207	6.41748	1.13351	0.88543	0.913215	0.977386	0.922188	0.970062	0.977272	0.956507	1.02183	0.80782
H7BYX6	Neural cell adhesion molecule 1 OS=Homo sapiens GN=NCAM1 PE=1 SV=2 - [H7BYX6_HUMAN]	24.55	15	15	38	725	80.2331	4.88135	0.964151	0.993307	1.04333	1.00026	1.13062	0.978561	0.938825	1.016	0.98451	0.814619
Q6UXB8	Peptidase inhibitor 16 OS=Homo sapiens GN=PI16 PE=1 SV=1 - [PI16_HUMAN]	26.35	10	10	36	463	49.4395	5.38916	0.920798	0.921266	1.00207	0.948043	1.10523	1.0192	1.00811	1.04418	0.907933	0.0784071
A2NB45	Cold agglutinin FS-1 L-chain (Fragment) OS=Homo sapiens PE=2 SV=1 - [A2NB45_HUMAN]	32.74	1	2	18	113	12.3802	8.48486	1.08362	2.14152	0.430844	1.21866	1.20998	1.1864	1.56001	1.3188	0.924072	0.854716
B2R983	cDNA, FLJ94267, highly similar to Homo sapiens glutathione S-transferase omega 1 (GSTO1), mRNA OS=Homo sapiens PE=2 SV=1 - [B2R983_HUMAN]	39	11	11	40	241	27.521	6.59521	1.02721	1.02565	1.15289	1.06858	0.635374	1.07965	0.944117	0.88638	1.20556	0.257369
V9H1C1	Gelsolin exon 4 (Fragment) OS=Homo sapiens PE=4 SV=1 - [V9H1C1_HUMAN]	69.57	1	4	48	69	7.97411	5.78271	1.04399	0.85134	0.983656	0.959662	1.15688	0.935453	0.96616	1.0195	0.94131	0.540951
P01861	Immunoglobulin heavy constant gamma 4 OS=Homo sapiens GN=IGHG4 PE=1 SV=1 - [IGHG4_HUMAN]	21.41	2	6	38	327	35.9179	7.35693	1.0165	1.25593	1.12585	1.13276	1.03896	0.759362	1.06721	0.955178	1.18592	0.213547
B3KX75	cDNA FLJ44930 fis, clone BRAMY3015549, highly similar to Neural cell adhesion molecule L1-like protein (Fragment) OS=Homo sapiens PE=2 SV=1 - [B3KX75_HUMAN]	22.64	1	20	37	1113	124.679	6.16357	0.940676	1.48276	0.932359	1.1186	1.03045	0.713201	0.838478	0.86071	1.29962	0.275086
P10599	Thioredoxin OS=Homo sapiens GN=TXN PE=1 SV=3 - [THIO_HUMAN]	31.43	4	4	19	105	11.7297	4.91943	1.04885	0.912061	1.1749	1.04527	0.634403	0.989843	0.963432	0.862559	1.21182	0.253863
U5LGU2	Apolipoprotein L1 (Fragment) OS=Homo sapiens GN=APOL1 PE=4 SV=1 - [U5LGU2_HUMAN]	42.66	14	14	38	293	32.6752	7.15186	1.26631	1.56288	0.83749	1.22223	0.992385	1.00748	0.896621	0.965495	1.26591	0.295292
L7UYB8	Glycoprotein Ib alpha polypeptide G942 deletion mutant OS=Homo sapiens GN=GP1BA PE=2 SV=1 - [L7UYB8_HUMAN]	23.42	6	6	24	333	36.9494	5.63037	1.03204	1.06903	1.05523	1.0521	0.928487	0.834432	1.03367	0.932198	1.12863	0.109949
A0N5G5	Rheumatoid factor D5 light chain (Fragment) OS=Homo sapiens GN=V-kappa-3 PE=2 SV=1 - [A0N5G5_HUMAN]	35.59	1	4	27	118	12.7585	8.96826	1.00878	1.54645	0.779808	1.11168	1.1398	1.08642	1.12391	1.11671	0.995494	0.98343
A0N5G3	Rheumatoid factor G9 light chain (Fragment) OS=Homo sapiens GN=V-lambda-3 PE=2 SV=1 - [A0N5G3_HUMAN]	28.93	2	3	18	121	12.8893	6.52197	0.444536	1.16337	0.209473	0.605794	2.12058	0.828779	1.16052	1.36996	0.442199	0.188082
Q04917	14-3-3 protein eta OS=Homo sapiens GN=YWHAH PE=1 SV=4 - [1433F_HUMAN]	60.16	9	13	40	246	28.201	4.84326	1.12041	0.934941	1.16139	1.07225	0.528664	0.998608	0.989956	0.839076	1.27789	0.242423
A0A075B6S2	Immunoglobulin kappa variable 2D-29 OS=Homo sapiens GN=IGKV2D-29 PE=3 SV=1 - [KVD29_HUMAN]	20	1	2	16	120	13.1347	7.12256	1.26183	1.74539	0.671731	1.22632	1.01706	0.784623	1.35998	1.05389	1.16361	0.650395
A0A087X0M8	Neural cell adhesion molecule L1-like protein OS=Homo sapiens GN=CHL1 PE=1 SV=1 - [A0A087X0M8_HUMAN]	20.75	1	20	37	1171	130.713	5.79541	1.0002	1.06408	0.914773	0.993016	1.21446	0.767484	0.865953	0.9493	1.04605	0.774054
A0A1W6IYL0	N90-VRC38.07 light chain variable region (Fragment) OS=Homo sapiens PE=2 SV=1 - [A0A1W6IYL0_HUMAN]	18.58	1	2	16	113	12.3632	7.98682	0.954571	2.67674	0.423522	1.35161	1.09764	0.894884	1.6654	1.21931	1.10851	0.862786
B7Z1N6	Fructose-bisphosphate aldolase OS=Homo sapiens PE=2 SV=1 - [B7Z1N6_HUMAN]	17.54	2	6	20	325	35.4011	7.06396	1.04845	1.08076	1.23568	1.12163	0.701662	1.01564	0.950965	0.889423	1.26108	0.106402
P02533	Keratin, type I cytoskeletal 14 OS=Homo sapiens GN=KRT14 PE=1 SV=4 - [K1C14_HUMAN]	27.33	5	13	41	472	51.5294	5.16064	0.884436	0.695569	1.15325	0.911086	1.10729	1.03133	1.07407	1.0709	0.850767	0.300791
A0A140T8Z8	Tenascin-X (Fragment) OS=Homo sapiens GN=TNXB PE=1 SV=1 - [A0A140T8Z8_HUMAN]	8.8	19	19	29	3296	358.438	5.13525	1.04159	0.994018	0.967649	1.00109	1.08295	0.994189	0.97084	1.01599	0.985328	0.731006
A0A087WZB5	Beta-parvin OS=Homo sapiens GN=PARVB PE=1 SV=1 - [A0A087WZB5_HUMAN]	31.14	7	7	24	289	33.2366	5.89697	1.06281	0.870455	1.19595	1.04307	0.556809	1.00164	0.966623	0.841692	1.23926	0.304769
P06702	Protein S100-A9 OS=Homo sapiens GN=S100A9 PE=1 SV=1 - [S10A9_HUMAN]	80.7	7	7	34	114	13.2335	6.12549	0.935631	1.23975	1.04504	1.07347	0.644214	1.13651	1.49121	1.09065	0.984254	0.950732
Q96AF9	ZYX protein (Fragment) OS=Homo sapiens GN=ZYX PE=2 SV=2 - [Q96AF9_HUMAN]	32.62	11	11	24	466	50.4398	7.50342	1.15881	0.918794	1.18547	1.08769	0.651844	1.01261	0.904673	0.856374	1.27011	0.165282
A0A1Z1VXF2	CD44 protein (Fragment) OS=Homo sapiens GN=CD44 PE=4 SV=1 - [A0A1Z1VXF2_HUMAN]	19.6	4	4	31	199	21.8483	4.80518	0.961349	1.09159	0.984943	1.01263	1.10331	0.985416	0.925448	1.00472	1.00787	0.910231
E5RIF9	Carbonic anhydrase 1 (Fragment) OS=Homo sapiens GN=CA1 PE=1 SV=1 - [E5RIF9_HUMAN]	66.22	1	8	30	148	16.3079	6.25244	0.755696	1.3246	1.54532	1.20854	1.04645	0.638116	1.30043	0.995002	1.21461	0.521412
A0A0C4DH25	Immunoglobulin kappa variable 3D-20 OS=Homo sapiens GN=IGKV3D-20 PE=3 SV=1 - [KVD20_HUMAN]	21.55	1	2	13	116	12.5072	4.58936	1.1293	1.86708	0.620164	1.20552	0.912191	1.03295	1.54617	1.16377	1.03587	0.923958
B2RDW0	cDNA, FLJ96792, highly similar to Homo sapiens calmodulin 2 (phosphorylase kinase, delta) (CALM2), mRNA OS=Homo sapiens PE=2 SV=1 - [B2RDW0_HUMAN]	46.98	7	7	31	149	16.7668	4.22119	1.1105	0.897715	1.25162	1.08661	0.458787	1.05151	0.843284	0.784528	1.38505	0.208737
E7ENL6	Collagen alpha-3(VI) chain OS=Homo sapiens GN=COL6A3 PE=1 SV=2 - [E7ENL6_HUMAN]	11.25	25	25	35	2569	277.946	8.17725	0.870645	0.989326	0.954508	0.93816	1.19396	1.03402	1.01721	1.08173	0.867277	0.0967647
P02776	Platelet factor 4 OS=Homo sapiens GN=PF4 PE=1 SV=2 - [PLF4_HUMAN]	43.56	2	5	24	101	10.8379	8.6167	0.689418	0.437933	1.45063	0.859328	0.437773	0.728406	0.602655	0.589612	1.45745	0.441265
B2R773	cDNA, FLJ93312, highly similar to Homo sapiens adipose most abundant gene transcript 1 (APM1), mRNA OS=Homo sapiens PE=2 SV=1 - [B2R773_HUMAN]	19.26	4	4	29	244	26.409	5.74463	0.891982	1.00647	1.11631	1.00492	1.29418	1.00804	1.04266	1.11496	0.901311	0.377706
Q6VFQ6	Hemoglobin beta chain (Fragment) OS=Homo sapiens GN=HBB PE=3 SV=1 - [Q6VFQ6_HUMAN]	57.14	1	2	11	42	4.51041	8.23584	1.0539	1.51684	0.720215	1.09699	0.811937	1.17682	1.96347	1.31741	0.832683	0.620049
Q6MZL2	Uncharacterized protein DKFZp686M0562 (Fragment) OS=Homo sapiens GN=DKFZp686M0562 PE=2 SV=1 - [Q6MZL2_HUMAN]	30.84	9	9	24	321	35.1196	5.97314	0.910499	1.04485	0.884443	0.946598	1.16025	0.999586	0.967132	1.04232	0.908162	0.285333
P08779	Keratin, type I cytoskeletal 16 OS=Homo sapiens GN=KRT16 PE=1 SV=4 - [K1C16_HUMAN]	22.41	2	10	36	473	51.2362	5.04639	1.07819	0.677854	1.0747	0.943579	1.1185	1.12035	1.03237	1.09041	0.865347	0.341067
Q9UL85	Myosin-reactive immunoglobulin kappa chain variable region (Fragment) OS=Homo sapiens PE=2 SV=1 - [Q9UL85_HUMAN]	31.19	2	3	15	109	11.7539	8.51416	0.973182	1.57418	0.656104	1.06782	1.10633	1.03225	1.44245	1.19368	0.894566	0.69386
Q6LDG4	Complement protein (Fragment) OS=Homo sapiens GN=C2 PE=4 SV=1 - [Q6LDG4_HUMAN]	30.16	2	3	20	63	7.1587	7.18115	0.929883	0.821499	0.919735	0.890372	1.24175	0.980497	1.04721	1.08982	0.816991	0.0803783
E3UN46	Insulin-like growth factor II transcript variant 3 isoform 1 (Fragment) OS=Homo sapiens GN=IGF2 PE=2 SV=1 - [E3UN46_HUMAN]	22.94	2	2	23	109	12.0209	7.51807	0.989638	0.924984	1.00703	0.973884	1.11242	0.945242	0.959816	1.00583	0.968243	0.616998
P00441	Superoxide dismutase [Cu-Zn] OS=Homo sapiens GN=SOD1 PE=1 SV=2 - [SODC_HUMAN]	37.01	6	6	21	154	15.9259	6.12549	1.10743	0.862159	1.11203	1.02721	0.707775	1.04813	1.03054	0.928813	1.10593	0.51532
P33908	Mannosyl-oligosaccharide 1,2-alpha-mannosidase IA OS=Homo sapiens GN=MAN1A1 PE=1 SV=3 - [MA1A1_HUMAN]	23.74	15	15	36	653	72.9223	6.46826	0.944615	0.932606	0.939082	0.938768	1.16309	0.963317	1.03224	1.05288	0.891617	0.123751
P55072	Transitional endoplasmic reticulum ATPase OS=Homo sapiens GN=VCP PE=1 SV=4 - [TERA_HUMAN]	18.61	15	15	24	806	89.2657	5.26221	1.11911	0.868624	1.24975	1.07916	0.557132	0.992577	1.03932	0.863009	1.25046	0.31865
A0A125U0U7	MS-C1 heavy chain variable region (Fragment) OS=Homo sapiens PE=2 SV=1 - [A0A125U0U7_HUMAN]	22.88	2	2	17	118	13.0884	6.07471	1.07468	1.73848	0.587685	1.13361	1.30785	1.09118	1.37702	1.25868	0.900636	0.734906
Q02985	Complement factor H-related protein 3 OS=Homo sapiens GN=CFHR3 PE=1 SV=2 - [FHR3_HUMAN]	19.7	4	7	36	330	37.2987	7.54736	0.601714	1.16715	0.843481	0.870782	1.2223	0.657353	0.882468	0.920708	0.945775	0.840095
B3KXZ9	cDNA FLJ46477 fis, clone THYMU3025118, highly similar to Cell surface glycoprotein MUC18 OS=Homo sapiens PE=2 SV=1 - [B3KXZ9_HUMAN]	28.63	11	11	25	531	58.9827	5.18604	0.993049	0.981333	1.0362	1.00353	1.07144	0.957014	0.971814	1.00009	1.00344	0.935023
Q9UE52	Apolipoprotein B-100 gene intron CI and flanking regions (Fragment) OS=Homo sapiens PE=4 SV=1 - [Q9UE52_HUMAN]	33.33	1	2	40	36	3.88296	5.0083	1.00275	1.03996	1.02988	1.0242	1.03994	0.950306	0.975205	0.988483	1.03613	0.284576
Q15404	Ras suppressor protein 1 OS=Homo sapiens GN=RSU1 PE=1 SV=3 - [RSU1_HUMAN]	49.82	12	12	32	277	31.5207	8.646	1.05568	0.876474	1.20222	1.04479	0.564007	1.00765	0.993578	0.855077	1.22187	0.335393
O00187	Mannan-binding lectin serine protease 2 OS=Homo sapiens GN=MASP2 PE=1 SV=4 - [MASP2_HUMAN]	18.37	11	11	27	686	75.6536	5.63037	0.922408	0.930066	1.0147	0.955724	1.12082	1.00023	0.95296	1.02467	0.932713	0.300771
A6XMH1	Transthyretin OS=Homo sapiens PE=2 SV=1 - [A6XMH1_HUMAN]	19.57	3	3	13	138	14.9475	5.75732	0.916344	0.831694	1.15039	0.966141	1.14308	0.908658	0.96617	1.00597	0.960408	0.753824
P18065	Insulin-like growth factor-binding protein 2 OS=Homo sapiens GN=IGFBP2 PE=1 SV=2 - [IBP2_HUMAN]	35.38	10	10	22	325	34.7912	7.50342	0.940897	1.02117	1.0949	1.01899	1.08713	1.06017	0.967259	1.03819	0.981509	0.754886
Q6EMK4	Vasorin OS=Homo sapiens GN=VASN PE=1 SV=1 - [VASN_HUMAN]	12.93	7	7	21	673	71.6675	7.38623	0.934971	1.01417	0.965631	0.97159	1.04559	1.01725	1.00792	1.02359	0.949199	0.112935
P27348	14-3-3 protein theta OS=Homo sapiens GN=YWHAQ PE=1 SV=1 - [1433T_HUMAN]	34.69	3	9	35	245	27.7468	4.77979	1.07474	0.970339	1.24173	1.0956	0.668373	0.987725	0.928885	0.861661	1.2715	0.136917
P05109	Protein S100-A8 OS=Homo sapiens GN=S100A8 PE=1 SV=1 - [S10A8_HUMAN]	55.91	6	6	24	93	10.8276	7.03467	0.964165	1.18175	1.00106	1.04899	0.682945	1.14067	1.38583	1.06982	0.980534	0.928053
C0IMJ3	Periostin isoform thy6 OS=Homo sapiens PE=2 SV=1 - [C0IMJ3_HUMAN]	15.24	10	10	12	781	87.2169	7.94287	0.958628	0.911631	0.85881	0.90969	1.22906	1.00315	0.957645	1.06328	0.855548	0.158513
Q3ZCW2	Galectin-related protein OS=Homo sapiens GN=LGALSL PE=1 SV=2 - [LEGL_HUMAN]	33.72	5	5	12	172	18.9737	5.35107	1.0849	1.17129	1.1487	1.13497	0.558872	1.07882	0.934833	0.85751	1.32356	0.152208
B7Z832	cDNA FLJ51409, highly similar to Thrombospondin-4 OS=Homo sapiens PE=2 SV=1 - [B7Z832_HUMAN]	23.45	11	12	21	870	95.8867	4.64014	1.00979	1.01242	1.03817	1.02012	1.03511	1.00097	0.950674	0.995584	1.02465	0.400975
A0A120HG46	GCT-A10 heavy chain variable region (Fragment) OS=Homo sapiens PE=2 SV=1 - [A0A120HG46_HUMAN]	29.92	1	4	33	127	13.5858	8.80713	0.963814	2.60221	0.455334	1.34045	1.12683	1.11115	1.56	1.26599	1.05882	0.916143
J3K000	PEPD protein OS=Homo sapiens GN=PEPD PE=2 SV=1 - [J3K000_HUMAN]	41.18	15	15	27	493	54.5469	5.99854	1.04116	1.01022	1.01468	1.02202	0.978291	1.01313	0.912868	0.968098	1.0557	0.156272
A0A024RAB6	Heparan sulfate proteoglycan 2 (Perlecan), isoform CRA_b OS=Homo sapiens GN=HSPG2 PE=4 SV=1 - [A0A024RAB6_HUMAN]	3.87	14	14	21	4346	463.723	6.50732	0.922656	1.02433	1.01899	0.98866	1.17709	0.955203	1.05788	1.06339	0.929723	0.358661
F5H265	Polyubiquitin-C (Fragment) OS=Homo sapiens GN=UBC PE=1 SV=1 - [F5H265_HUMAN]	45.64	3	3	16	149	16.8311	6.58057	1.07229	1.02358	1.01376	1.03654	0.816375	1.07543	1.11287	1.00156	1.03493	0.731223
P10720	Platelet factor 4 variant OS=Homo sapiens GN=PF4V1 PE=1 SV=1 - [PF4V_HUMAN]	45.19	1	4	19	104	11.5453	9.1001	0.819715	0.653677	1.51514	0.996178	0.552047	0.811227	0.546459	0.636577	1.5649	0.265398
A8K335	cDNA FLJ76254, highly similar to Homo sapiens gamma-glutamyl hydrolase (GGH), mRNA OS=Homo sapiens PE=2 SV=1 - [A8K335_HUMAN]	33.65	11	11	21	318	36.0243	7.41553	0.953491	1.00096	0.850714	0.935055	1.13974	0.994494	1.05593	1.06339	0.879315	0.103767
Q8NBP7	Proprotein convertase subtilisin/kexin type 9 OS=Homo sapiens GN=PCSK9 PE=1 SV=3 - [PCSK9_HUMAN]	15.46	10	10	20	692	74.2391	6.60986	1.00341	0.955003	0.982921	0.980445	1.09173	0.996453	0.91686	1.00168	0.978799	0.706324
O95445	Apolipoprotein M OS=Homo sapiens GN=APOM PE=1 SV=2 - [APOM_HUMAN]	46.81	8	8	23	188	21.2394	6.01123	1.20023	1.14447	1.05681	1.13384	1.07785	0.84579	0.779824	0.901155	1.2582	0.0796131
B4DMH3	Coronin OS=Homo sapiens PE=2 SV=1 - [B4DMH3_HUMAN]	33.18	14	15	34	437	49.3471	7.02002	1.05844	0.966195	1.16326	1.06263	0.531753	0.945858	1.02478	0.834131	1.27394	0.233944
P31146	Coronin-1A OS=Homo sapiens GN=CORO1A PE=1 SV=4 - [COR1A_HUMAN]	31.89	14	15	34	461	50.9938	6.68311	1.06797	0.967697	1.17477	1.07015	0.543036	0.979938	0.996519	0.839831	1.27424	0.223572
Q15084	Protein disulfide-isomerase A6 OS=Homo sapiens GN=PDIA6 PE=1 SV=1 - [PDIA6_HUMAN]	29.09	8	8	12	440	48.0913	5.08447	1.1147	0.915915	1.25007	1.09356	0.606163	1.0129	0.966576	0.861881	1.26881	0.223712
B4DXW1	Actin-related protein 3 OS=Homo sapiens GN=ACTR3 PE=1 SV=1 - [B4DXW1_HUMAN]	33.51	10	10	21	367	41.9773	5.61768	1.09053	0.906009	1.23533	1.07729	0.545154	0.988216	0.966142	0.833171	1.293	0.23061
Q6YHK3	CD109 antigen OS=Homo sapiens GN=CD109 PE=1 SV=2 - [CD109_HUMAN]	12.04	15	15	20	1445	161.587	5.84619	0.971945	0.88041	1.05022	0.967524	0.978778	0.990157	0.906286	0.958407	1.00951	0.877824
P58546	Myotrophin OS=Homo sapiens GN=MTPN PE=1 SV=2 - [MTPN_HUMAN]	38.14	3	3	10	118	12.8866	5.51611	1.1483	0.859879	1.15438	1.05419	0.635219	0.998166	0.915962	0.849782	1.24054	0.23589
Q15166	Serum paraoxonase/lactonase 3 OS=Homo sapiens GN=PON3 PE=1 SV=3 - [PON3_HUMAN]	10.17	2	4	23	354	39.5823	5.41455	0.964931	1.0588	1.16199	1.06191	0.964014	0.825027	0.88092	0.889987	1.19317	0.0693998
A0A0A0MSI0	Peroxiredoxin-1 (Fragment) OS=Homo sapiens GN=PRDX1 PE=1 SV=1 - [A0A0A0MSI0_HUMAN]	42.11	7	8	18	171	18.9637	6.91748	1.01591	0.910675	1.04273	0.989772	0.71091	0.969231	1.18658	0.955574	1.03579	0.82307
A8K430	Fructose-bisphosphate aldolase OS=Homo sapiens PE=2 SV=1 - [A8K430_HUMAN]	33.24	12	13	21	364	39.4471	8.20654	0.825371	1.90166	0.834737	1.18726	1.01451	1.08596	0.79167	0.964046	1.23154	0.57693
Q14019	Coactosin-like protein OS=Homo sapiens GN=COTL1 PE=1 SV=3 - [COTL1_HUMAN]	66.2	9	9	29	142	15.935	5.66846	1.07945	1.0211	1.0348	1.04512	0.579225	0.988349	1.06541	0.877662	1.1908	0.332124
Q53G71	Calreticulin variant (Fragment) OS=Homo sapiens PE=2 SV=1 - [Q53G71_HUMAN]	44.33	14	14	31	406	46.8901	4.44971	1.09066	0.970342	1.20865	1.08989	0.617114	0.958957	0.974655	0.850242	1.28185	0.151521
B7Z6F3	cDNA FLJ56245, highly similar to Homo sapiens bridging integrator 2 (BIN2), mRNA OS=Homo sapiens PE=2 SV=1 - [B7Z6F3_HUMAN]	17.81	9	9	18	539	59.1513	4.98291	1.02208	1.0071	1.10192	1.0437	0.663468	0.983022	1.03054	0.892342	1.16962	0.272166
H7BZJ3	Protein disulfide-isomerase A3 (Fragment) OS=Homo sapiens GN=PDIA3 PE=1 SV=1 - [H7BZJ3_HUMAN]	53.66	1	6	19	123	13.5108	7.29834	1.13202	0.962157	1.3077	1.13396	0.660856	1.05312	0.865253	0.859744	1.31895	0.143412
P50395	Rab GDP dissociation inhibitor beta OS=Homo sapiens GN=GDI2 PE=1 SV=2 - [GDIB_HUMAN]	37.98	9	14	16	445	50.6309	6.46826	1.03692	0.922511	1.16052	1.03998	0.721302	0.997299	0.942819	0.88714	1.17229	0.23291
V9HWC6	Peptidyl-prolyl cis-trans isomerase OS=Homo sapiens GN=HEL-S-39 PE=2 SV=1 - [V9HWC6_HUMAN]	37.5	8	9	20	208	22.728	9.31982	1.06068	0.945407	1.2343	1.08013	0.572523	0.959522	0.914301	0.815449	1.32458	0.148717
P30041	Peroxiredoxin-6 OS=Homo sapiens GN=PRDX6 PE=1 SV=3 - [PRDX6_HUMAN]	46.43	11	11	21	224	25.0192	6.37939	1.09691	0.887043	1.15906	1.04767	0.700417	1.16194	0.993064	0.951809	1.10071	0.576676
A4D2D2	Procollagen C-endopeptidase enhancer OS=Homo sapiens GN=PCOLCE PE=4 SV=1 - [A4D2D2_HUMAN]	32.29	10	10	29	449	47.928	7.43018	0.936591	0.961077	0.900992	0.932887	1.20296	1.05698	1.01763	1.09252	0.853883	0.0538053
P05362	Intercellular adhesion molecule 1 OS=Homo sapiens GN=ICAM1 PE=1 SV=2 - [ICAM1_HUMAN]	16.92	7	7	11	532	57.789	7.98682	0.944869	1.00706	0.954284	0.968738	1.21675	0.797681	0.971655	0.995362	0.973252	0.839332
Q5NV90	V2-17 protein (Fragment) OS=Homo sapiens GN=V2-17 PE=1 SV=1 - [Q5NV90_HUMAN]	41.24	3	3	20	97	10.3989	4.58936	0.884592	1.9387	0.509845	1.11105	1.3873	1.08322	1.53173	1.33409	0.832814	0.644491
P02741	C-reactive protein OS=Homo sapiens GN=CRP PE=1 SV=1 - [CRP_HUMAN]	24.55	6	6	24	224	25.0227	5.63037	0.426841	1.28344	0.401084	0.703789	0.724391	1.04141	3.47865	1.74815	0.40259	0.318376
P15144	Aminopeptidase N OS=Homo sapiens GN=ANPEP PE=1 SV=4 - [AMPN_HUMAN]	19.96	17	17	30	967	109.471	5.47803	0.922878	1.17057	0.973158	1.0222	1.00051	0.949634	0.965962	0.972034	1.05161	0.550554
A0A193CHQ9	10E8 heavy chain variable region (Fragment) OS=Homo sapiens PE=2 SV=1 - [A0A193CHQ9_HUMAN]	19.85	1	2	20	131	14.472	7.94287	1.07134	2.50012	0.436398	1.33595	1.13319	1.01588	1.68468	1.27792	1.04542	0.932539
P52209	6-phosphogluconate dehydrogenase, decarboxylating OS=Homo sapiens GN=PGD PE=1 SV=3 - [6PGD_HUMAN]	16.77	8	8	12	483	53.106	7.2251	1.02501	0.985827	1.10212	1.03765	0.634241	1.03101	1.01759	0.894283	1.16032	0.346481
F8W020	Nucleosome assembly protein 1-like 1 (Fragment) OS=Homo sapiens GN=NAP1L1 PE=1 SV=1 - [F8W020_HUMAN]	43	7	7	12	207	24.3513	4.51318	1.13476	0.961428	1.25442	1.11687	0.554879	0.98897	0.929308	0.824386	1.35479	0.142072
C9J813	Caldesmon (Fragment) OS=Homo sapiens GN=CALD1 PE=1 SV=1 - [C9J813_HUMAN]	27.89	10	10	11	459	54.1265	5.71924	0.905792	0.852385	1.39756	1.05191	0.521948	1.00323	1.01571	0.846962	1.24198	0.437288
S6BGF5	IgG H chain OS=Homo sapiens PE=2 SV=1 - [S6BGF5_HUMAN]	14.58	1	3	14	240	25.5836	8.55811	0.86279	2.42952	0.568522	1.28694	1.16114	1.07566	1.58981	1.27554	1.00894	0.985721
Q9HCC1	Single chain Fv (Fragment) OS=Homo sapiens PE=1 SV=1 - [Q9HCC1_HUMAN]	36.61	1	3	15	112	12.235	8.47021	1.06819	1.16712	0.854309	1.02987	1.19828	1.02537	0.997932	1.07386	0.959039	0.713579
P09211	Glutathione S-transferase P OS=Homo sapiens GN=GSTP1 PE=1 SV=2 - [GSTP1_HUMAN]	26.19	4	4	9	210	23.341	5.64307	1.09011	1.0388	1.14794	1.09228	0.644568	0.963634	0.933249	0.84715	1.28936	0.0826749
B2R5G8	Serum amyloid A protein OS=Homo sapiens PE=2 SV=1 - [B2R5G8_HUMAN]	21.54	3	3	13	130	14.7983	8.98291	1.13399	1.57765	0.992302	1.23465	1.03353	0.851634	1.04315	0.976104	1.26487	0.238958
A0A125U0V2	GCT-A1 heavy chain variable region (Fragment) OS=Homo sapiens PE=2 SV=1 - [A0A125U0V2_HUMAN]	25.2	1	3	21	127	13.7089	8.77783	1.23501	2.15017	0.396459	1.26055	1.09338	1.14924	1.88782	1.37681	0.915554	0.84766
A2J422	Anti-HER3 scFv (Fragment) OS=Homo sapiens PE=2 SV=1 - [A2J422_HUMAN]	8.2	1	2	14	244	26.0085	8.39697	1.05234	2.27877	0.594016	1.30838	0.987241	1.19809	1.30524	1.16352	1.1245	0.791087
P62328	Thymosin beta-4 OS=Homo sapiens GN=TMSB4X PE=1 SV=2 - [TYB4_HUMAN]	56.82	3	3	22	44	5.04952	5.05908	1.27191	0.696767	0.577404	0.848693	0.440257	1.19735	0.860609	0.832738	1.01916	0.960979
P27487	Dipeptidyl peptidase 4 OS=Homo sapiens GN=DPP4 PE=1 SV=2 - [DPP4_HUMAN]	11.1	9	9	15	766	88.2225	6.03662	0.974759	1.05864	1.02332	1.01891	0.956137	1.00269	0.813178	0.924001	1.10271	0.200505
A5YAK2	Apolipoprotein C-IV OS=Homo sapiens GN=APOC4 PE=2 SV=1 - [A5YAK2_HUMAN]	35.43	4	5	21	127	14.5704	9.12939	1.7518	0.898013	1.0208	1.22354	0.913136	0.801085	0.695485	0.803235	1.52326	0.19957
A2J1N5	Rheumatoid factor RF-ET6 (Fragment) OS=Homo sapiens PE=2 SV=1 - [A2J1N5_HUMAN]	30.85	1	3	20	94	10.4432	9.12939	1.09374	2.30976	0.440414	1.2813	1.29179	1.10109	1.44649	1.27979	1.00118	0.997961
A0A1U9X7W4	HSPA1A OS=Homo sapiens PE=3 SV=1 - [A0A1U9X7W4_HUMAN]	17.32	6	10	22	641	69.995	5.65576	1.07719	0.935329	1.10792	1.04015	0.658249	0.992369	1.00571	0.885444	1.17472	0.285112
P62942	Peptidyl-prolyl cis-trans isomerase FKBP1A OS=Homo sapiens GN=FKBP1A PE=1 SV=2 - [FKB1A_HUMAN]	25	2	2	7	108	11.9431	8.1626	1.02035	0.990458	1.03213	1.01431	0.871871	1.02521	0.9416	0.946226	1.07196	0.213155
A8K6K4	cDNA FLJ77565, highly similar to Homo sapiens interleukin 1 receptor accessory protein (IL1RAP), transcript variant 1, mRNA OS=Homo sapiens PE=2 SV=1 - [A8K6K4_HUMAN]	12.81	8	8	16	570	65.3907	8.22119	1.04453	0.975927	1.00059	1.00702	1.05585	0.916457	0.959052	0.977119	1.0306	0.550024
A2J1N0	Rheumatoid factor RF-IP14 (Fragment) OS=Homo sapiens PE=2 SV=1 - [A2J1N0_HUMAN]	18.75	1	2	15	96	10.4921	8.96826	1.25943	1.96803	0.416945	1.2148	1.49773	1.03159	1.72993	1.41975	0.855644	0.699006
Q15430	Coagulation factor V (Fragment) OS=Homo sapiens GN=F5 PE=2 SV=1 - [Q15430_HUMAN]	30.51	1	5	13	236	26.1288	5.47803	0.361186	0.718455	1.14656	0.742066	1.1223	0.749487	0.99655	0.956114	0.776127	0.443598
A3RKG7	Coagulation factor VII (Fragment) OS=Homo sapiens PE=2 SV=1 - [A3RKG7_HUMAN]	35.53	6	6	12	273	30.1264	8.33838	1.00466	1.03175	0.962483	0.999634	1.16504	1.04486	1.09652	1.10214	0.906994	0.0634063
Q99497	Protein/nucleic acid deglycase DJ-1 OS=Homo sapiens GN=PARK7 PE=1 SV=2 - [PARK7_HUMAN]	49.74	8	8	22	189	19.8785	6.78564	1.09019	0.980387	1.11966	1.06341	0.677202	0.973189	0.907132	0.852508	1.24739	0.100675
B2R7D2	cDNA, FLJ93389, highly similar to Homo sapiens multiple inositol polyphosphate histidine phosphatase, 1 (MINPP1), mRNA OS=Homo sapiens PE=2 SV=1 - [B2R7D2_HUMAN]	24.02	10	10	21	487	55.0852	7.97217	1.03099	0.893006	0.932833	0.952275	1.10831	0.999691	0.96913	1.02571	0.928407	0.280225
B4DRV4	cDNA FLJ55667, highly similar to Secreted protein acidic and rich in cysteine OS=Homo sapiens PE=2 SV=1 - [B4DRV4_HUMAN]	32.08	7	7	25	212	24.6861	5.61768	1.00058	0.909647	1.18907	1.0331	0.618739	1.00513	0.826623	0.816829	1.26476	0.193931
B3KSS4	cDNA FLJ36858 fis, clone ASTRO2015185, highly similar to POLIOVIRUS RECEPTOR OS=Homo sapiens PE=2 SV=1 - [B3KSS4_HUMAN]	11.6	4	4	9	362	39.5547	6.66846	0.995592	0.928385	1.058	0.993993	0.977995	0.965492	0.900786	0.948091	1.04842	0.359817
Q9UL84	Myosin-reactive immunoglobulin heavy chain variable region (Fragment) OS=Homo sapiens PE=2 SV=1 - [Q9UL84_HUMAN]	14.75	1	2	9	122	13.5706	8.45557	1.06509	1.99749	0.74032	1.26763	1.08725	0.948674	1.30127	1.1124	1.13955	0.711273
P48059	LIM and senescent cell antigen-like-containing domain protein 1 OS=Homo sapiens GN=LIMS1 PE=1 SV=4 - [LIMS1_HUMAN]	30.77	9	9	16	325	37.2258	8.04541	1.20438	1.0018	1.08193	1.09604	0.586486	1.09493	1.08942	0.923611	1.18668	0.388919
Q0ZCH5	Immunglobulin heavy chain variable region (Fragment) OS=Homo sapiens PE=4 SV=1 - [Q0ZCH5_HUMAN]	15.13	1	2	8	119	12.9625	8.83643	0.518964	1.31145	0.389037	0.739818	0.625515	1.05604	4.85941	2.18032	0.339316	0.354193
P00491	Purine nucleoside phosphorylase OS=Homo sapiens GN=PNP PE=1 SV=2 - [PNPH_HUMAN]	32.53	8	8	18	289	32.0972	6.94678	1.05407	0.900293	1.1022	1.01885	0.81314	1.08195	0.953164	0.949419	1.07313	0.520354
P54108	Cysteine-rich secretory protein 3 OS=Homo sapiens GN=CRISP3 PE=1 SV=1 - [CRIS3_HUMAN]	16.73	5	5	26	245	27.612	7.79639	1.00018	0.929541	1.06801	0.999245	1.09806	0.964106	0.966673	1.00961	0.989732	0.870403
Q14769	Alpha-N-acetylglucosaminidase OS=Homo sapiens GN=ufHSD2 PE=4 SV=1 - [Q14769_HUMAN]	8.61	4	4	7	639	71.9821	6.3667	0.930405	1.13297	1.144	1.06912	0.986318	0.978254	0.772875	0.912483	1.17166	0.186921
B3GN61	Truncated E-cadherin OS=Homo sapiens GN=CDH1 PE=2 SV=1 - [B3GN61_HUMAN]	18.07	10	10	17	758	83.7706	4.89404	0.907688	0.874006	1.01768	0.933126	1.04989	1.26609	1.0094	1.10846	0.841822	0.125432
P37837	Transaldolase OS=Homo sapiens GN=TALDO1 PE=1 SV=2 - [TALDO_HUMAN]	23.44	8	8	12	337	37.5165	6.81494	1.06285	0.985519	1.14116	1.06318	0.680903	1.01609	0.940716	0.879235	1.20921	0.172903
B7ZLY3	LTBP1 protein OS=Homo sapiens GN=LTBP1 PE=2 SV=1 - [B7ZLY3_HUMAN]	6.13	6	6	10	1353	148.364	5.09717	0.93824	0.846177	1.15479	0.979736	0.641163	0.935357	1.06168	0.879399	1.1141	0.551593
Q9Y5Y7	Lymphatic vessel endothelial hyaluronic acid receptor 1 OS=Homo sapiens GN=LYVE1 PE=1 SV=2 - [LYVE1_HUMAN]	8.07	3	3	14	322	35.191	8.27979	1.13369	0.97315	0.853102	0.986649	1.22861	0.941176	0.999308	1.05636	0.934005	0.591254
G3V0E5	Transferrin receptor (P90, CD71), isoform CRA_c OS=Homo sapiens GN=TFRC PE=1 SV=1 - [G3V0E5_HUMAN]	15.61	9	9	12	679	75.9166	6.81494	1.0502	1.00284	0.948967	1.00067	0.943514	0.925073	0.884485	0.917691	1.09042	0.0714274
B4E3A8	cDNA FLJ53963, highly similar to Leukocyte elastase inhibitor OS=Homo sapiens PE=2 SV=1 - [B4E3A8_HUMAN]	19.94	7	7	12	341	38.6607	6.66846	1.08111	0.906107	1.15803	1.04842	0.561785	1.0205	0.918504	0.833595	1.25771	0.244981
Q584P1	Uncharacterized protein PCYOX1 (Fragment) OS=Homo sapiens GN=PCYOX1 PE=4 SV=1 - [Q584P1_HUMAN]	19.85	7	7	16	398	45.1098	5.94775	1.14967	1.00153	1.16629	1.10583	1.10449	0.969578	0.900243	0.991435	1.11538	0.224111
Q9BWP8	Collectin-11 OS=Homo sapiens GN=COLEC11 PE=1 SV=1 - [COL11_HUMAN]	12.92	3	3	6	271	28.647	5.41455	0.919978	0.6945	1.15247	0.922315	0.968313	0.985072	0.992727	0.982037	0.939185	0.67532
P55058	Phospholipid transfer protein OS=Homo sapiens GN=PLTP PE=1 SV=1 - [PLTP_HUMAN]	9.13	4	4	9	493	54.7045	7.00537	0.987566	1.06788	0.964989	1.00681	1.1174	0.895245	0.969161	0.993936	1.01296	0.867474
B2R7T8	cDNA, FLJ93598, highly similar to Homo sapiens capping protein (actin filament) muscle Z-line, beta (CAPZB), mRNA OS=Homo sapiens PE=2 SV=1 - [B2R7T8_HUMAN]	24.63	6	6	12	272	30.6374	5.99854	1.00783	1.03382	1.09738	1.04634	0.668197	1.03902	1.08501	0.930743	1.1242	0.438846
P18669	Phosphoglycerate mutase 1 OS=Homo sapiens GN=PGAM1 PE=1 SV=2 - [PGAM1_HUMAN]	24.8	5	5	9	254	28.7858	7.18115	0.994889	0.922327	1.12731	1.01484	0.744953	0.984613	0.994421	0.907996	1.11767	0.350888
P81605	Dermcidin OS=Homo sapiens GN=DCD PE=1 SV=2 - [DCD_HUMAN]	42.73	7	7	13	110	11.2768	6.53662	0.933035	1.17058	1.16509	1.08957	0.956668	0.996584	1.01447	0.989241	1.10142	0.27874
Q12913	Receptor-type tyrosine-protein phosphatase eta OS=Homo sapiens GN=PTPRJ PE=1 SV=3 - [PTPRJ_HUMAN]	5.53	6	6	13	1337	145.851	5.57959	0.982611	0.997815	1.01778	0.999402	1.02714	0.988559	0.978014	0.997905	1.0015	0.937944
B4DPW9	cDNA FLJ51929, highly similar to Plastin-3 OS=Homo sapiens PE=2 SV=1 - [B4DPW9_HUMAN]	10.28	1	6	20	603	67.5566	5.65576	1.02927	0.784145	1.38166	1.06502	0.755962	0.874447	0.733436	0.787948	1.35164	0.196243
E7EQR4	Ezrin OS=Homo sapiens GN=EZR PE=1 SV=3 - [E7EQR4_HUMAN]	14.68	2	11	26	586	69.3287	6.16357	0.935619	0.943201	1.14881	1.00921	0.855391	0.984715	0.913307	0.917804	1.09959	0.312815
A0A024R5M3	Cortactin, isoform CRA_c OS=Homo sapiens GN=CTTN PE=4 SV=1 - [A0A024R5M3_HUMAN]	16.37	8	8	10	513	57.4315	5.32568	1.06482	1.00673	1.14052	1.07069	0.585378	1.04718	0.816447	0.816334	1.31159	0.140861
Q5VZR0	Golgi-associated plant pathogenesis-related protein 1 OS=Homo sapiens GN=GLIPR2 PE=1 SV=1 - [Q5VZR0_HUMAN]	26.56	3	3	5	128	14.2041	9.51025	0.952795	1.01272	1.06705	1.01085	0.937119	0.914773	0.790558	0.880817	1.14763	0.0819699
J3KTB5	Eukaryotic initiation factor 4A-I (Fragment) OS=Homo sapiens GN=EIF4A1 PE=1 SV=1 - [J3KTB5_HUMAN]	13.23	3	3	5	257	29.0629	5.08447	1.09944	1.00014	1.20649	1.10202	0.627946	1.0016	0.944623	0.858056	1.28433	0.135152
A0A0B4J1R6	Transketolase OS=Homo sapiens GN=TKT PE=1 SV=1 - [A0A0B4J1R6_HUMAN]	21.66	7	7	13	457	49.8789	7.91357	1.01315	1.00865	1.1158	1.04587	0.904386	0.989055	1.03151	0.974985	1.0727	0.238391
E7EX60	Neuropilin-1 OS=Homo sapiens GN=NRP1 PE=1 SV=1 - [E7EX60_HUMAN]	14.82	9	9	12	641	72.0474	6.78564	0.910214	0.94665	0.958551	0.938471	1.14118	1.05227	0.989408	1.06095	0.884555	0.0574821
B7Z766	cDNA FLJ54564, highly similar to 150 kDa oxygen-regulated protein (Orp150) OS=Homo sapiens PE=2 SV=1 - [B7Z766_HUMAN]	14.27	10	10	15	848	94.1411	5.0083	0.987067	0.970206	1.00246	0.986578	1.09111	1.00132	1.04476	1.04573	0.943433	0.0982588
Q13790	Apolipoprotein F OS=Homo sapiens GN=APOF PE=1 SV=2 - [APOF_HUMAN]	11.66	3	3	7	326	35.377	5.64307	1.1088	1.46469	1.04466	1.20605	1.08663	0.82477	0.947812	0.953071	1.26544	0.169075
A0A1U9WZ84	Insulin-like growth factor I (Fragment) OS=Homo sapiens PE=3 SV=1 - [A0A1U9WZ84_HUMAN]	50	3	3	6	70	7.64963	7.60596	1.08469	1.15288	0.972984	1.07018	0.984923	0.959887	1.03994	0.994917	1.07565	0.260804
Q16853	Membrane primary amine oxidase OS=Homo sapiens GN=AOC3 PE=1 SV=3 - [AOC3_HUMAN]	6.95	5	5	10	763	84.5683	6.52197	0.968454	1.07795	1.04563	1.03068	1.07645	0.913087	1.01898	1.00284	1.02776	0.655327
B3KPS3	Tubulin alpha chain OS=Homo sapiens PE=2 SV=1 - [B3KPS3_HUMAN]	22.6	3	8	13	416	46.2118	5.12256	1.0631	0.7105	1.26388	1.01249	0.48101	1.10376	1.08326	0.889343	1.13847	0.661077
Q76LX8	A disintegrin and metalloproteinase with thrombospondin motifs 13 OS=Homo sapiens GN=ADAMTS13 PE=1 SV=1 - [ATS13_HUMAN]	5.05	6	6	8	1427	153.505	7.1665	1.02241	0.911606	1.01522	0.983081	0.928893	0.971565	0.950844	0.950434	1.03435	0.437133
B3KRY3	cDNA FLJ35079 fis, clone PLACE6005283, highly similar to Lysosome-associated membrane glycoprotein 1 OS=Homo sapiens PE=2 SV=1 - [B3KRY3_HUMAN]	6.84	3	3	6	395	42.5584	8.49951	1.06308	1.05299	1.00533	1.04047	1.17267	0.930875	0.946498	1.01668	1.0234	0.781343
Q14515	SPARC-like protein 1 OS=Homo sapiens GN=SPARCL1 PE=1 SV=2 - [SPRL1_HUMAN]	9.79	5	5	10	664	75.1613	4.80518	0.890406	1.13389	1.02576	1.01668	1.03007	1.03344	1.01001	1.02451	0.992361	0.917317
B9EJA8	Mannose receptor, C type 1-like 1 OS=Homo sapiens GN=MRC1L1 PE=2 SV=1 - [B9EJA8_HUMAN]	8.24	13	13	16	1456	165.918	6.50732	0.941791	0.932253	0.894252	0.922765	1.11165	0.980071	1.00412	1.03195	0.894197	0.0639521
P40925	Malate dehydrogenase, cytoplasmic OS=Homo sapiens GN=MDH1 PE=1 SV=4 - [MDHC_HUMAN]	18.86	7	7	13	334	36.403	7.35693	0.986413	0.993344	1.19933	1.0597	0.683027	0.975309	0.905305	0.854547	1.24007	0.142115
Q13103	Secreted phosphoprotein 24 OS=Homo sapiens GN=SPP2 PE=1 SV=1 - [SPP24_HUMAN]	9.95	2	2	6	211	24.3218	8.32373	0.604159	0.736502	1.5978	0.979486	0.651912	0.630306	0.564396	0.615538	1.59127	0.309048
B4E3Q4	Adenosine deaminase 2 OS=Homo sapiens GN=ADA2 PE=1 SV=1 - [B4E3Q4_HUMAN]	11.3	6	6	9	469	54.3248	8.14795	0.931814	0.927944	0.940091	0.933283	1.13205	0.999423	1.01442	1.04863	0.890002	0.0518709
P08294	Extracellular superoxide dismutase [Cu-Zn] OS=Homo sapiens GN=SOD3 PE=1 SV=2 - [SODE_HUMAN]	30.42	5	5	8	240	25.8347	6.60986	0.915952	0.969883	0.888855	0.924897	1.10765	0.87358	0.927348	0.969527	0.953966	0.582299
Q9P1F3	Costars family protein ABRACL OS=Homo sapiens GN=ABRACL PE=1 SV=1 - [ABRAL_HUMAN]	65.43	3	3	6	81	9.05086	6.29053	1.12175	0.837151	1.15496	1.03795	0.502841	1.1258	0.903751	0.844131	1.22961	0.404844
B4DWQ5	cDNA FLJ51655, highly similar to Actin-like protein 2 OS=Homo sapiens PE=2 SV=1 - [B4DWQ5_HUMAN]	14.75	3	4	15	305	34.4859	5.71924	1.04482	0.947414	1.11675	1.03633	0.745336	1.01763	1.00114	0.921372	1.12477	0.318096
P04180	Phosphatidylcholine-sterol acyltransferase OS=Homo sapiens GN=LCAT PE=1 SV=1 - [LCAT_HUMAN]	10.91	4	4	10	440	49.5461	6.11279	1.05281	1.3965	0.950605	1.1333	1.05323	0.890064	0.874261	0.939183	1.20669	0.255756
Q9ULI3	Protein HEG homolog 1 OS=Homo sapiens GN=HEG1 PE=1 SV=3 - [HEG1_HUMAN]	4.56	5	5	9	1381	147.369	6.17627	0.971863	1.03595	1.03282	1.01354	1.08678	0.916378	1.02028	1.00781	1.00569	0.920266
J3QQX6	Intercellular adhesion molecule 2 (Fragment) OS=Homo sapiens GN=ICAM2 PE=1 SV=1 - [J3QQX6_HUMAN]	28.97	6	6	16	214	23.6618	6.50732	0.957004	0.916457	0.999473	0.957645	1.11366	1.01052	0.960614	1.02827	0.93132	0.238671
Q13201	Multimerin-1 OS=Homo sapiens GN=MMRN1 PE=1 SV=3 - [MMRN1_HUMAN]	5.21	4	4	7	1228	138.023	7.92822	0.972185	1.01269	1.1171	1.03399	0.950497	1.00724	1.19336	1.05036	0.984414	0.856838
P34096	Ribonuclease 4 OS=Homo sapiens GN=RNASE4 PE=1 SV=3 - [RNAS4_HUMAN]	35.37	5	5	11	147	16.8294	9.02686	0.917064	0.885518	0.99987	0.934151	1.12362	0.948677	1.09799	1.05676	0.883975	0.129334
A8K690	cDNA FLJ76863, highly similar to Homo sapiens stress-induced-phosphoprotein 1 (Hsp70/Hsp90-organizing protein) (STIP1), mRNA OS=Homo sapiens PE=2 SV=1 - [A8K690_HUMAN]	15.65	10	10	11	543	62.6154	6.80029	1.02682	0.95585	1.15227	1.04498	0.66685	1.01774	1.02319	0.902591	1.15775	0.338585
P52565	Rho GDP-dissociation inhibitor 1 OS=Homo sapiens GN=ARHGDIA PE=1 SV=3 - [GDIR1_HUMAN]	46.08	7	7	14	204	23.1927	5.10986	1.07821	0.914532	1.18184	1.05819	0.519902	1.00164	0.950131	0.82389	1.28439	0.243414
Q9BTY2	Plasma alpha-L-fucosidase OS=Homo sapiens GN=FUCA2 PE=1 SV=2 - [FUCO2_HUMAN]	8.35	4	4	5	467	54.0321	6.25244	0.853907	0.956457	0.997638	0.936001	1.13455	0.936787	1.02839	1.03324	0.905887	0.244617
Q12860	Contactin-1 OS=Homo sapiens GN=CNTN1 PE=1 SV=1 - [CNTN1_HUMAN]	12.48	12	12	14	1018	113.249	5.89697	0.957485	1.03705	0.999252	0.997929	0.996872	0.931345	0.955398	0.961205	1.03821	0.28674
A0A0S2Z4D8	Protein kinase C substrate 80K-H isoform 1 (Fragment) OS=Homo sapiens GN=PRKCSH PE=2 SV=1 - [A0A0S2Z4D8_HUMAN]	18.8	8	8	13	399	45.0963	4.32275	1.08902	0.977735	1.02183	1.02953	0.831408	0.9708	1.00031	0.934172	1.10208	0.194875
A0A024RDA6	Insulin-like growth factor binding protein 7, isoform CRA_a (Fragment) OS=Homo sapiens GN=IGFBP7 PE=4 SV=1 - [A0A024RDA6_HUMAN]	23.2	4	4	5	194	20.3383	8.54346	0.894132	1.10531	0.930542	0.976661	1.25914	0.998667	1.10592	1.12124	0.871053	0.221009
Q07954	Prolow-density lipoprotein receptor-related protein 1 OS=Homo sapiens GN=LRP1 PE=1 SV=2 - [LRP1_HUMAN]	2.75	12	12	13	4544	504.276	5.38916	0.934613	1.05174	0.979524	0.988627	1.09476	0.939786	0.949991	0.994846	0.993749	0.923164
C9IZP8	Complement C1s subcomponent (Fragment) OS=Homo sapiens GN=C1S PE=1 SV=1 - [C9IZP8_HUMAN]	16.5	1	1	14	103	11.8006	4.1958	1.1405	1.25783	0.874694	1.09101	1.22776	1.10192	1.12057	1.15008	0.948636	0.648128
A0A087X1X5	Calponin (Fragment) OS=Homo sapiens GN=CNN2 PE=1 SV=1 - [A0A087X1X5_HUMAN]	8.9	2	2	4	191	20.9452	8.86572	1.00319	0.900449	1.13647	1.01337	0.605811	1.02074	0.958211	0.861588	1.17616	0.357572
P31150	Rab GDP dissociation inhibitor alpha OS=Homo sapiens GN=GDI1 PE=1 SV=2 - [GDIA_HUMAN]	26.62	4	9	9	447	50.5501	5.13525	1.09475	0.961998	1.13914	1.0653	0.568006	1.07079	0.9453	0.861366	1.23675	0.271943
A0A0U2N547	Mast/stem cell growth factor receptor Kit isoform 3 OS=Homo sapiens GN=KIT PE=2 SV=1 - [A0A0U2N547_HUMAN]	5.87	6	6	7	971	109.294	6.88818	1.00452	1.03583	0.998802	1.01305	1.12127	0.996834	0.903822	1.00731	1.0057	0.93285
Q13418	Integrin-linked protein kinase OS=Homo sapiens GN=ILK PE=1 SV=2 - [ILK_HUMAN]	19.69	9	9	16	452	51.3859	8.07471	1.21887	1.09722	1.02967	1.11526	0.606553	1.0892	1.07345	0.923068	1.2082	0.315741
A2IPI6	HRV Fab 027-VL (Fragment) OS=Homo sapiens PE=2 SV=1 - [A2IPI6_HUMAN]	20.35	1	2	10	113	12.3752	9.40771	0.878678	2.11446	0.447609	1.14692	1.17738	1.00914	2.00439	1.39697	0.821002	0.691852
C9JFR7	Cytochrome c (Fragment) OS=Homo sapiens GN=CYCS PE=1 SV=1 - [C9JFR7_HUMAN]	39.6	4	4	5	101	11.326	9.65674	1.13939	1.02166	1.07398	1.07834	0.754147	1.07348	0.926523	0.918051	1.1746	0.178528
A8K3B0	cDNA FLJ77877, highly similar to Human ENO2 neuron specific (gamma) enolase OS=Homo sapiens PE=2 SV=1 - [A8K3B0_HUMAN]	8.76	2	3	5	434	47.2831	5.03369	1.08295	0.826035	1.2083	1.0391	0.449617	0.971587	0.729547	0.716917	1.4494	0.162003
P16930	Fumarylacetoacetase OS=Homo sapiens GN=FAH PE=1 SV=2 - [FAAA_HUMAN]	14.8	6	6	9	419	46.3442	6.94678	0.973546	1.2711	0.88924	1.04463	0.923305	1.04608	0.972665	0.980685	1.0652	0.625668
O60234	Glia maturation factor gamma OS=Homo sapiens GN=GMFG PE=1 SV=1 - [GMFG_HUMAN]	33.8	4	4	4	142	16.7904	5.26221	1.10553	0.955524	1.24176	1.10094	0.581458	1.03407	0.863254	0.826261	1.33244	0.152503
P26447	Protein S100-A4 OS=Homo sapiens GN=S100A4 PE=1 SV=1 - [S10A4_HUMAN]	36.63	5	5	15	101	11.7207	6.11279	1.09444	0.900531	1.19896	1.06464	0.597068	0.977511	0.930042	0.834874	1.27521	0.196031
A0A024R6Y5	Dipeptidase OS=Homo sapiens GN=DPEP2 PE=3 SV=1 - [A0A024R6Y5_HUMAN]	12.76	5	5	7	486	53.3313	6.53662	0.870609	0.976957	0.97152	0.939695	1.05042	0.975757	0.999662	1.00861	0.931672	0.168003
B4DG86	cDNA FLJ60487, highly similar to Macrophage colony-stimulating factor 1receptor (CSF-1-R) (EC 2.7.10.1) OS=Homo sapiens PE=2 SV=1 - [B4DG86_HUMAN]	9.62	2	2	5	343	37.4251	6.88818	1.03556	1.05514	0.842391	0.977698	1.12136	1.17184	0.88819	1.06046	0.921955	0.496009
O75144	ICOS ligand OS=Homo sapiens GN=ICOSLG PE=1 SV=2 - [ICOSL_HUMAN]	12.58	3	3	5	302	33.3277	5.31299	0.948385	1.22153	1.05749	1.0758	1.12647	0.963654	0.844417	0.978181	1.0998	0.439879
J3KPD9	NME1-NME2 readthrough OS=Homo sapiens GN=NME1-NME2 PE=1 SV=1 - [J3KPD9_HUMAN]	37.06	5	5	18	197	22.4077	9.53955	1.07918	0.89712	1.14546	1.04059	0.680634	0.992033	0.945566	0.872744	1.19232	0.241355
P06312	Immunoglobulin kappa variable 4-1 OS=Homo sapiens GN=IGKV4-1 PE=1 SV=1 - [KV401_HUMAN]	27.27	1	3	12	121	13.3716	5.24951	1.19039	2.90016	0.246393	1.44565	1.26356	1.22282	1.52747	1.33795	1.0805	0.897177
P13667	Protein disulfide-isomerase A4 OS=Homo sapiens GN=PDIA4 PE=1 SV=2 - [PDIA4_HUMAN]	16.12	10	10	13	645	72.887	5.07178	1.07158	1.00599	1.12706	1.06821	0.70852	1.00672	1.01293	0.90939	1.17464	0.209711
Q92859	Neogenin OS=Homo sapiens GN=NEO1 PE=1 SV=2 - [NEO1_HUMAN]	4.11	5	5	10	1461	159.917	6.53662	0.969012	1.00579	0.948287	0.974364	1.20943	1.03204	0.895927	1.0458	0.931695	0.482194
B4E2S7	cDNA FLJ58780, highly similar to Homo sapiens lysosomal-associated membrane protein 2 (LAMP2), transcript variant LAMP2B, mRNA OS=Homo sapiens PE=2 SV=1 - [B4E2S7_HUMAN]	10.19	4	4	7	363	39.7868	5.66846	1.02091	1.00471	1.00759	1.01107	1.14549	1.01503	0.969384	1.0433	0.969105	0.575919
B4DEW5	cDNA FLJ54049, highly similar to Multimerin-2 OS=Homo sapiens PE=2 SV=1 - [B4DEW5_HUMAN]	2.89	2	2	3	727	79.9884	5.74463	1.00569	0.931084	0.927151	0.954643	1.17064	0.966684	0.916507	1.01794	0.937815	0.482227
H0YLI6	Isocitrate dehydrogenase [NAD] subunit alpha, mitochondrial (Fragment) OS=Homo sapiens GN=IDH3A PE=1 SV=1 - [H0YLI6_HUMAN]	4.48	1	1	8	134	14.7997	8.104	0.859003	5.34671	0.366995	2.1909	0.34583	0.34168	0.297405	0.328305	6.67337	0.304944
C9JGI3	Thymidine phosphorylase (Fragment) OS=Homo sapiens GN=TYMP PE=1 SV=1 - [C9JGI3_HUMAN]	12.36	4	4	4	445	46.0582	5.51611	1.02031	1.03775	1.02566	1.02791	0.736261	1.09123	0.931468	0.919654	1.11771	0.351601
A8K061	cDNA FLJ77880, highly similar to Homo sapiens angiopoietin-like 3, mRNA OS=Homo sapiens PE=2 SV=1 - [A8K061_HUMAN]	15.65	6	6	7	460	53.6052	6.59521	0.910418	0.989204	1.02178	0.973801	1.29963	0.964382	0.934713	1.06624	0.913301	0.489435
P43487	Ran-specific GTPase-activating protein OS=Homo sapiens GN=RANBP1 PE=1 SV=1 - [RANG_HUMAN]	15.42	3	3	5	201	23.2956	5.2876	1.05358	0.971221	1.12649	1.05043	0.631148	1.01162	0.926425	0.856397	1.22657	0.191812
B4DQ98	cDNA FLJ55135, highly similar to Di-N-acetylchitobiase (EC 3.2.1.-) OS=Homo sapiens PE=2 SV=1 - [B4DQ98_HUMAN]	21.2	7	7	10	382	43.4054	6.44287	0.956561	0.883357	1.03097	0.956963	1.08257	0.99366	0.981832	1.01935	0.938792	0.305688
A0A0S2Z4N8	Vasodilator-stimulated phosphoprotein isoform 2 (Fragment) OS=Homo sapiens GN=VASP PE=2 SV=1 - [A0A0S2Z4N8_HUMAN]	24.09	8	8	13	328	35.4058	8.93896	1.01208	0.887212	1.2381	1.0458	0.514422	0.983157	1.08247	0.860017	1.21602	0.411961
B4DDL4	cDNA FLJ53966, moderately similar to Homo sapiens cytidylate kinase (CMPK), mRNA OS=Homo sapiens PE=2 SV=1 - [B4DDL4_HUMAN]	15.47	2	2	5	181	20.5459	8.95361	1.13891	1.08494	1.12837	1.11741	0.734665	1.04813	0.965647	0.916148	1.21968	0.102164
M0R192	Flavin reductase (NADPH) OS=Homo sapiens GN=BLVRB PE=1 SV=1 - [M0R192_HUMAN]	22.7	4	4	6	163	17.1497	6.78564	1.0713	0.857819	0.870296	0.933137	1.02157	1.02443	1.31355	1.11985	0.83327	0.191783
Q9Y509	VH3 protein (Fragment) OS=Homo sapiens GN=VH3 PE=2 SV=1 - [Q9Y509_HUMAN]	15.65	1	2	5	147	15.7587	8.38232	0.730651	2.98185	0.815657	1.50939	0.796477	0.754922	1.13698	0.896127	1.68434	0.457507
Q5NV92	V5-6 protein (Fragment) OS=Homo sapiens GN=V5-6 PE=4 SV=1 - [Q5NV92_HUMAN]	10.1	1	1	4	99	10.567	6.26514	1.07077	2.75801	0.188757	1.33918	1.75566	1.06483	1.87367	1.56472	0.855858	0.790671
B3KNN9	cDNA FLJ30070 fis, clone ASTRO2000046, highly similar to CD166 ANTIGEN OS=Homo sapiens PE=2 SV=1 - [B3KNN9_HUMAN]	13.15	6	6	12	555	61.9015	6.18896	0.969898	0.988106	0.953799	0.970601	1.14015	0.958584	0.962858	1.02053	0.951076	0.456535
P03950	Angiogenin OS=Homo sapiens GN=ANG PE=1 SV=1 - [ANGI_HUMAN]	37.41	6	6	18	147	16.5394	9.64209	0.917864	0.842694	1.12003	0.960196	1.12173	0.855274	1.13096	1.03599	0.926839	0.569876
H7C457	Collagen alpha-1(XVIII) chain (Fragment) OS=Homo sapiens GN=COL18A1 PE=1 SV=1 - [H7C457_HUMAN]	14.29	4	4	6	280	31.0078	9.40771	0.855099	1.01625	0.883577	0.918309	1.40263	0.964723	1.20962	1.19232	0.770184	0.114344
A0A0A0MSN4	Angiotensin-converting enzyme OS=Homo sapiens GN=ACE PE=1 SV=1 - [A0A0A0MSN4_HUMAN]	5.8	7	7	7	1242	142.33	6.22705	0.897262	0.877547	0.985088	0.919965	1.15398	0.924818	0.914179	0.99766	0.922124	0.411996
U5YKD2	MHC class I antigen (Fragment) OS=Homo sapiens GN=HLA-A PE=3 SV=1 - [U5YKD2_HUMAN]	10.98	3	3	5	337	37.9108	6.32861	1.08634	1.05512	0.923354	1.02161	1.05901	1.08143	0.990916	1.04378	0.978752	0.716473
A0JNT2	KRT83 protein OS=Homo sapiens GN=KRT83 PE=2 SV=1 - [A0JNT2_HUMAN]	15.21	3	7	7	447	49.6095	5.38916	0.545304	0.629065	0.713715	0.629361	4.31392	0.546798	0.770449	1.87706	0.335292	0.364656
P55290	Cadherin-13 OS=Homo sapiens GN=CDH13 PE=1 SV=1 - [CAD13_HUMAN]	9.12	6	6	11	713	78.2379	4.98291	0.928976	1.029	1.00112	0.986366	1.03725	0.988611	0.940283	0.988714	0.997626	0.956968
P48426	Phosphatidylinositol 5-phosphate 4-kinase type-2 alpha OS=Homo sapiens GN=PIP4K2A PE=1 SV=2 - [PI42A_HUMAN]	12.07	5	5	7	406	46.1955	6.99072	1.07418	0.890418	1.07741	1.014	0.772027	1.03866	0.937319	0.916001	1.10699	0.379481
Q99969	Retinoic acid receptor responder protein 2 OS=Homo sapiens GN=RARRES2 PE=1 SV=1 - [RARR2_HUMAN]	21.47	3	3	9	163	18.6058	9.08545	0.86079	1.13341	0.908583	0.967594	1.36043	1.01566	1.05862	1.14491	0.84513	0.265913
A0A0C4DH29	Immunoglobulin heavy variable 1-3 OS=Homo sapiens GN=IGHV1-3 PE=3 SV=1 - [HV103_HUMAN]	28.21	2	3	8	117	12.9994	9.5542	0.928896	2.44471	0.520833	1.29815	1.15605	0.980401	1.82757	1.32134	0.982448	0.972814
A0A0A7E7X3	Aminopeptidase (Fragment) OS=Homo sapiens GN=ERAP1 PE=2 SV=1 - [A0A0A7E7X3_HUMAN]	6.59	6	6	7	941	107.163	6.40479	0.95661	0.963936	1.0269	0.982482	0.83797	0.974479	0.928547	0.913665	1.07532	0.208106
C9J0J0	Coiled-coil domain-containing protein 126 (Fragment) OS=Homo sapiens GN=CCDC126 PE=1 SV=8 - [C9J0J0_HUMAN]	10.91	1	1	5	110	12.7029	9.48096	0.972575	1.05097	0.970344	0.997964	1.16098	1.0062	0.994927	1.05403	0.946804	0.401323
B4E367	cDNA FLJ61564, highly similar to Plexin domain-containing protein 2 OS=Homo sapiens PE=2 SV=1 - [B4E367_HUMAN]	11.26	6	6	8	515	58.1468	6.3667	0.8707	0.885685	1.26739	1.00793	1.00798	0.845533	0.867111	0.906874	1.11143	0.508759
A4UCT0	Fructose-bisphosphate aldolase (Fragment) OS=Homo sapiens PE=2 SV=1 - [A4UCT0_HUMAN]	40.98	1	4	9	122	13.3938	6.771	1.09595	1.1608	0.905855	1.0542	0.964414	0.860698	1.13323	0.986114	1.06904	0.570354
P08758	Annexin A5 OS=Homo sapiens GN=ANXA5 PE=1 SV=2 - [ANXA5_HUMAN]	16.88	4	5	9	320	35.9144	5.04639	1.10203	0.970848	1.13362	1.06883	0.658173	1.00838	0.91492	0.860489	1.24212	0.146775
A8K0T9	cDNA FLJ75422, highly similar to Homo sapiens capping protein (actin filament) muscle Z-line, alpha 1, mRNA OS=Homo sapiens PE=2 SV=1 - [A8K0T9_HUMAN]	15.03	2	3	4	286	32.8883	5.69385	1.01876	0.930604	1.18667	1.04534	0.577359	1.07561	1.10442	0.919128	1.13732	0.536391
V9HW35	Epididymis secretory protein Li 55 OS=Homo sapiens GN=HEL-S-55 PE=2 SV=1 - [V9HW35_HUMAN]	19.14	2	2	3	162	17.02	7.23975	1.03934	1.30955	1.13165	1.16018	0.680264	0.943261	1.10189	0.908472	1.27707	0.160467
Q8N294	cDNA FLJ33633 fis, clone BRAMY2022786, highly similar to Homo sapiens dickkopf-3 (DKK-3) mRNA OS=Homo sapiens PE=2 SV=1 - [Q8N294_HUMAN]	20	3	3	4	215	23.889	4.67822	0.98472	0.931597	1.07494	0.997085	1.08582	0.926976	0.985792	0.99953	0.997554	0.970653
Q5JY90	Tyrosine-protein kinase OS=Homo sapiens GN=BTK PE=1 SV=1 - [Q5JY90_HUMAN]	4.35	2	2	3	483	55.8452	8.03076	1.00629	1.08024	1.07605	1.05419	0.729025	1.01783	0.912556	0.886471	1.1892	0.128474
B7Z3I9	Delta-aminolevulinic acid dehydratase OS=Homo sapiens PE=2 SV=1 - [B7Z3I9_HUMAN]	9.27	2	2	3	313	34.4975	7.1958	1.0854	0.915008	1.09833	1.03291	0.990849	0.997496	1.09371	1.02735	1.00541	0.93854
B4DHN0	Mitogen-activated protein kinase OS=Homo sapiens PE=2 SV=1 - [B4DHN0_HUMAN]	2.01	1	1	8	348	40.3948	7.15186	1.06745	0.987746	0.935742	0.99698	1.16275	0.98963	1.03025	1.06088	0.93977	0.379922
A0A087X0S5	Collagen alpha-1(VI) chain OS=Homo sapiens GN=COL6A1 PE=1 SV=1 - [A0A087X0S5_HUMAN]	4	3	3	7	1026	108.272	5.42725	0.956623	1.01246	1.14866	1.03925	0.896532	1.01505	0.834873	0.915486	1.13519	0.186732
B1ALC0	Actin-related protein 2/3 complex subunit 5 OS=Homo sapiens GN=ARPC5 PE=1 SV=1 - [B1ALC0_HUMAN]	33.33	5	5	8	135	14.7984	5.05908	1.13133	0.959262	1.22021	1.1036	0.582222	0.927463	0.989362	0.833015	1.32482	0.141555
I3L397	Eukaryotic translation initiation factor 5A (Fragment) OS=Homo sapiens GN=EIF5A PE=1 SV=8 - [I3L397_HUMAN]	19.18	3	3	5	146	16.0089	4.99561	1.12271	0.939046	1.09061	1.05079	0.683875	1.07869	0.997994	0.920187	1.14193	0.381981
Q59EY4	CDC10 protein variant (Fragment) OS=Homo sapiens PE=2 SV=1 - [Q59EY4_HUMAN]	17.32	5	6	8	381	43.7986	7.78174	1.03255	1.06674	1.18017	1.09315	0.664914	0.982895	0.959709	0.869172	1.2577	0.115308
A0A125QYY4	GCT-A7 heavy chain variable region (Fragment) OS=Homo sapiens PE=2 SV=1 - [A0A125QYY4_HUMAN]	26.89	1	3	6	119	13.1483	7.94287	0.818172	2.98642	0.399719	1.40144	1.06605	1.20517	1.6861	1.3191	1.06242	0.925158
Q7Z7M4	Superoxide dismutase (Fragment) OS=Homo sapiens GN=SOD2 PE=2 SV=1 - [Q7Z7M4_HUMAN]	23.94	4	4	6	213	23.658	7.31299	1.04455	1.26259	1.03026	1.11247	0.870249	0.957895	0.85616	0.894768	1.2433	0.0559898
Q2Q9B7	Glucose-6-phosphate 1-dehydrogenase (Fragment) OS=Homo sapiens GN=G6PD PE=3 SV=1 - [Q2Q9B7_HUMAN]	14.53	6	6	7	475	54.8218	7.07861	1.1082	1.00152	1.08259	1.0641	0.595229	0.994151	1.01312	0.867502	1.22663	0.232881
P08253	72 kDa type IV collagenase OS=Homo sapiens GN=MMP2 PE=1 SV=2 - [MMP2_HUMAN]	18.79	12	12	15	660	73.8347	5.46533	0.923759	0.967619	0.950823	0.9474	1.1689	0.979639	0.986245	1.04493	0.906665	0.198335
Q13822	Ectonucleotide pyrophosphatase/phosphodiesterase family member 2 OS=Homo sapiens GN=ENPP2 PE=1 SV=3 - [ENPP2_HUMAN]	9.5	7	7	11	863	98.9296	7.37158	0.953534	0.91902	0.998075	0.956876	1.05275	0.971359	1.00333	1.00915	0.948204	0.18759
P54289	Voltage-dependent calcium channel subunit alpha-2/delta-1 OS=Homo sapiens GN=CACNA2D1 PE=1 SV=3 - [CA2D1_HUMAN]	11.33	9	9	10	1103	124.49	5.2749	1.00489	1.03018	1.13948	1.05818	1.05576	0.908131	0.931153	0.965015	1.09655	0.205631
P17174	Aspartate aminotransferase, cytoplasmic OS=Homo sapiens GN=GOT1 PE=1 SV=3 - [AATC_HUMAN]	8.23	3	3	3	413	46.2185	7.00537	0.950249	1.25102	1.00528	1.06885	0.950821	1.05476	0.921087	0.975555	1.09563	0.407709
B4E190	cDNA FLJ57770, moderately similar to ADP-ribosylation factor 3 OS=Homo sapiens PE=2 SV=1 - [B4E190_HUMAN]	12.5	2	2	3	144	16.1485	7.34229	1.15186	0.927415	1.10724	1.06217	0.619122	0.998309	0.87878	0.83207	1.27654	0.154507
P80188	Neutrophil gelatinase-associated lipocalin OS=Homo sapiens GN=LCN2 PE=1 SV=2 - [NGAL_HUMAN]	16.16	2	2	4	198	22.5737	8.90967	0.961956	0.933771	0.998893	0.964873	1.14415	0.99184	1.14177	1.09258	0.883111	0.0764652
Q5NV88	V1-22 protein (Fragment) OS=Homo sapiens GN=V1-22 PE=1 SV=1 - [Q5NV88_HUMAN]	28.57	1	2	6	98	10.6369	4.77979	0.771871	3.80674	0.411028	1.66321	0.810318	0.654523	1.8045	1.08978	1.52619	0.640095
Q15323	Keratin, type I cuticular Ha1 OS=Homo sapiens GN=KRT31 PE=1 SV=3 - [K1H1_HUMAN]	14.66	5	6	7	416	47.2071	4.88135	0.594785	0.931062	0.680175	0.735341	2.9942	0.81596	0.900141	1.5701	0.46834	0.310544
B4DDZ4	Annexin OS=Homo sapiens PE=2 SV=1 - [B4DDZ4_HUMAN]	10.03	2	3	5	299	33.5928	5.85889	1.04638	0.95077	1.20044	1.06586	0.627591	0.991653	0.858841	0.826028	1.29035	0.136198
Q2HZY9	Coagulation factor V (Fragment) OS=Homo sapiens PE=4 SV=1 - [Q2HZY9_HUMAN]	70	1	5	12	70	8.37021	8.71924	0.480106	0.852398	1.02993	0.787477	1.10993	0.829197	1.10246	1.01386	0.77671	0.29153
Q15555	Microtubule-associated protein RP/EB family member 2 OS=Homo sapiens GN=MAPRE2 PE=1 SV=1 - [MARE2_HUMAN]	15.9	4	5	13	327	37.0082	5.56689	1.01455	0.94172	1.1401	1.03212	0.486865	1.02339	0.930714	0.813656	1.2685	0.28095
A2MYC8	V5-2 protein (Fragment) OS=Homo sapiens GN=V5-2 PE=4 SV=1 - [A2MYC8_HUMAN]	19.23	2	2	3	104	11.0344	7.28369	0.844863	2.20374	0.448621	1.16574	1.65235	1.20071	1.33612	1.39639	0.834825	0.695486
Q15819	Ubiquitin-conjugating enzyme E2 variant 2 OS=Homo sapiens GN=UBE2V2 PE=1 SV=4 - [UB2V2_HUMAN]	11.72	2	2	4	145	16.3522	8.08936	1.03678	0.928481	1.14854	1.03793	0.560076	0.973703	0.921325	0.818368	1.2683	0.203815
O14498	Immunoglobulin superfamily containing leucine-rich repeat protein OS=Homo sapiens GN=ISLR PE=2 SV=1 - [ISLR_HUMAN]	3.04	1	1	2	428	45.9684	5.14795	1.08242	1.14017	0.908306	1.04363	1.2159	1.01525	0.983703	1.07162	0.973884	0.794876
P55145	Mesencephalic astrocyte-derived neurotrophic factor OS=Homo sapiens GN=MANF PE=1 SV=3 - [MANF_HUMAN]	15.93	3	3	5	182	20.6868	8.68994	0.964915	0.985198	1.17016	1.04009	0.55525	1.03267	0.842157	0.810028	1.28402	0.207939
H0YD65	Cathepsin F (Fragment) OS=Homo sapiens GN=CTSF PE=1 SV=8 - [H0YD65_HUMAN]	6.74	2	2	4	282	31.7847	7.29834	0.957945	0.860924	0.992392	0.937087	0.995444	1.02574	0.929008	0.983398	0.952907	0.394889
A0A0A0MT36	Immunoglobulin kappa variable 6D-21 OS=Homo sapiens GN=IGKV6D-21 PE=3 SV=1 - [KVD21_HUMAN]	10.53	1	1	2	114	12.3322	7.28369	1.14129	1.92073	0.421036	1.16102	1.62228	0.936654	1.74984	1.43626	0.808363	0.612162
Q59F24	Vascular endothelial growth factor receptor 3 variant (Fragment) OS=Homo sapiens PE=2 SV=1 - [Q59F24_HUMAN]	8.32	3	3	3	649	71.6882	6.66846	0.981138	1.076	1.05158	1.03624	0.975932	1.02678	1.01183	1.00485	1.03124	0.384737
Q86UD1	Out at first protein homolog OS=Homo sapiens GN=OAF PE=2 SV=1 - [OAF_HUMAN]	17.95	4	4	4	273	30.6686	6.84424	0.890516	0.756617	0.97736	0.874831	1.17934	0.972967	1.08605	1.07945	0.810439	0.07985
Q53H37	Calmodulin-like skin protein variant (Fragment) OS=Homo sapiens PE=2 SV=1 - [Q53H37_HUMAN]	8.9	1	1	1	146	15.8667	4.43701	0.742876	0.927798	1.06674	0.912472	0.911741	1.06654	1.06742	1.01523	0.898779	0.391769
Q86YW5	Trem-like transcript 1 protein OS=Homo sapiens GN=TREML1 PE=1 SV=2 - [TRML1_HUMAN]	12.54	3	3	10	311	32.6579	6.04932	1.09058	1.13367	1.06831	1.09752	0.832756	1.01784	0.996188	0.948929	1.15659	0.0730393
P00568	Adenylate kinase isoenzyme 1 OS=Homo sapiens GN=AK1 PE=1 SV=3 - [KAD1_HUMAN]	23.2	4	4	5	194	21.6213	8.63135	1.04915	0.938631	1.08687	1.02488	0.63294	0.997313	0.916776	0.84901	1.20715	0.213883
P68366	Tubulin alpha-4A chain OS=Homo sapiens GN=TUBA4A PE=1 SV=1 - [TBA4A_HUMAN]	15.4	1	6	10	448	49.8924	5.05908	1.06713	0.504462	1.6321	1.0679	0.244069	1.04804	0.968474	0.753528	1.41719	0.489915
A2J1M8	Rheumatoid factor RF-IP12 (Fragment) OS=Homo sapiens PE=2 SV=1 - [A2J1M8_HUMAN]	32.63	2	3	10	95	10.6781	7.98682	1.08679	2.17102	0.581127	1.27964	1.02682	0.983885	1.48313	1.16461	1.09877	0.827793
Q8IZD8	Anti-thyroglobulin light chain variable region (Fragment) OS=Homo sapiens PE=2 SV=1 - [Q8IZD8_HUMAN]	21.78	1	2	4	101	10.3681	5.90967	1.17072	2.4596	0.377695	1.33601	1.59441	1.19379	1.75135	1.51318	0.882912	0.792147
A0A024R412	Neuropilin OS=Homo sapiens GN=NRP2 PE=1 SV=1 - [A0A024R412_HUMAN]	7.1	6	6	6	901	101.317	5.64307	0.958039	1.1329	1.02149	1.03748	1.0972	0.929436	0.896165	0.974266	1.06488	0.476278
F5H5I5	ATP-binding cassette sub-family B member 9 (Fragment) OS=Homo sapiens GN=ABCB9 PE=4 SV=1 - [F5H5I5_HUMAN]	10.77	1	1	6	65	7.43285	6.49365	0.995972	1.26607	0.755923	1.00599	1.14766	0.988097	1.24678	1.12751	0.892217	0.503488
A8K4W8	cDNA FLJ77917, highly similar to Homo sapiens ubiquitin-conjugating enzyme E2L 3 (UBE2L3), transcript variant 1, mRNA OS=Homo sapiens PE=2 SV=1 - [A8K4W8_HUMAN]	29.87	3	4	15	154	17.7782	8.74854	1.15806	1.02411	1.14341	1.10853	0.573902	1.01842	0.949336	0.847218	1.30844	0.144762
Q15185	Prostaglandin E synthase 3 OS=Homo sapiens GN=PTGES3 PE=1 SV=1 - [TEBP_HUMAN]	16.88	2	2	3	160	18.6854	4.53857	1.10784	0.912439	1.20804	1.07611	0.608265	0.97094	1.00422	0.861142	1.24963	0.234399
P59998	Actin-related protein 2/3 complex subunit 4 OS=Homo sapiens GN=ARPC4 PE=1 SV=3 - [ARPC4_HUMAN]	25.6	5	5	9	168	19.6543	8.42627	1.05447	0.83743	1.20692	1.03294	0.542533	1.05784	1.01634	0.872235	1.18424	0.460444
B2RBW9	cDNA, FLJ95746, highly similar to Homo sapiens inhibin, beta C (INHBC), mRNA OS=Homo sapiens PE=2 SV=1 - [B2RBW9_HUMAN]	10.23	3	3	5	352	38.2014	7.10791	0.956739	0.884687	1.0092	0.950207	1.14305	0.825406	0.987985	0.985481	0.964206	0.738489
O15143	Actin-related protein 2/3 complex subunit 1B OS=Homo sapiens GN=ARPC1B PE=1 SV=3 - [ARC1B_HUMAN]	10.22	5	5	10	372	40.9234	8.35303	1.06158	0.982625	1.11259	1.05227	0.710996	0.9538	1.04156	0.902119	1.16644	0.229022
Q59EZ3	Insulin-like growth factor 2 receptor variant (Fragment) OS=Homo sapiens PE=2 SV=1 - [Q59EZ3_HUMAN]	2.86	6	6	6	2414	265.943	5.8335	0.976042	0.976973	0.889356	0.947457	1.10722	0.952013	0.967335	1.00886	0.939141	0.344224
P13727	Bone marrow proteoglycan OS=Homo sapiens GN=PRG2 PE=1 SV=2 - [PRG2_HUMAN]	4.5	1	1	3	222	25.1893	6.75635	1.00996	1.05783	0.813434	0.960408	1.45442	0.867679	1.29725	1.20645	0.796063	0.266374
A0A024RC87	Ribonuclease/angiogenin inhibitor 1, isoform CRA_a OS=Homo sapiens GN=RNH1 PE=4 SV=1 - [A0A024RC87_HUMAN]	10.53	4	4	4	456	49.3848	4.84326	1.05832	0.997044	0.981404	1.01226	0.868575	0.995564	1.09156	0.985234	1.02743	0.714163
Q9H7V3	cDNA FLJ14219 fis, clone NT2RP3003800, highly similar to Rattus norvegicus tyrosine protein kinase pp60-c-src mRNA OS=Homo sapiens PE=2 SV=1 - [Q9H7V3_HUMAN]	8.37	2	2	3	251	28.7025	5.73193	0.866856	1.20164	1.12599	1.06483	0.602471	0.93441	0.96513	0.834004	1.27677	0.208589
F6RFD5	Destrin OS=Homo sapiens GN=DSTN PE=1 SV=1 - [F6RFD5_HUMAN]	20	2	3	4	135	15.3869	8.5874	1.06547	0.930008	1.18763	1.06103	0.63058	1.04754	0.954218	0.877447	1.20923	0.278739
A0A0F7T6Q1	IGHV1-2 protein (Fragment) OS=Homo sapiens GN=IGHV1-2 PE=4 SV=1 - [A0A0F7T6Q1_HUMAN]	29.52	2	3	7	105	11.9037	9.29053	0.793036	2.73157	0.610937	1.37851	0.984254	0.781783	1.20745	0.991163	1.3908	0.604305
A0A109PSY4	MS-A1 light chain variable region (Fragment) OS=Homo sapiens PE=2 SV=1 - [A0A109PSY4_HUMAN]	32.08	2	2	3	106	11.3687	8.48486	0.764764	2.43586	0.508266	1.2363	0.994437	1.26571	1.09701	1.11905	1.10477	0.856825
O95479	GDH/6PGL endoplasmic bifunctional protein OS=Homo sapiens GN=H6PD PE=1 SV=2 - [G6PE_HUMAN]	6.19	5	5	5	791	88.8364	7.29834	0.954471	1.00939	0.999642	0.987836	1.10688	0.995351	0.966754	1.023	0.96563	0.487027
D6RFG5	Annexin (Fragment) OS=Homo sapiens GN=ANXA3 PE=1 SV=1 - [D6RFG5_HUMAN]	16.88	2	2	2	154	17.1348	7.48877	1.0223	1.00346	1.07419	1.03332	0.689119	1.07349	1.02293	0.928511	1.11288	0.440197
Q15746	Myosin light chain kinase, smooth muscle OS=Homo sapiens GN=MYLK PE=1 SV=4 - [MYLK_HUMAN]	2.51	3	5	6	1914	210.583	6.15088	1.04875	0.972684	1.11306	1.04483	0.520954	0.994916	0.923758	0.813209	1.28482	0.204716
B4E324	cDNA FLJ60397, highly similar to Lysosomal protective protein (EC 3.4.16.5) OS=Homo sapiens PE=2 SV=1 - [B4E324_HUMAN]	6.88	3	3	4	480	54.235	6.97607	0.954802	0.918277	1.18533	1.01947	0.804639	1.03705	0.917788	0.919826	1.10833	0.405223
B4DFW2	Metalloproteinase inhibitor 2 OS=Homo sapiens GN=TIMP2 PE=1 SV=1 - [B4DFW2_HUMAN]	6.29	1	1	1	143	16.0707	6.30322	0.860702	0.883347	1.06591	0.936651	1.12676	1.09273	0.873177	1.03089	0.908585	0.410479
P61088	Ubiquitin-conjugating enzyme E2 N OS=Homo sapiens GN=UBE2N PE=1 SV=1 - [UBE2N_HUMAN]	19.08	3	3	5	152	17.127	6.56592	0.986022	0.980812	0.990195	0.985676	0.83236	1.04191	1.02161	0.965293	1.02112	0.775408
Q53QE9	Uncharacterized protein UGP2 (Fragment) OS=Homo sapiens GN=UGP2 PE=4 SV=1 - [Q53QE9_HUMAN]	11.42	5	5	7	438	49.1906	8.68994	1.04028	1.11239	1.06005	1.07091	0.805167	1.06357	0.992927	0.953887	1.12268	0.217601
F5GX11	Proteasome endopeptidase complex OS=Homo sapiens GN=PSMA1 PE=1 SV=1 - [F5GX11_HUMAN]	11.34	3	3	3	238	26.4884	6.72705	1.01856	0.961902	1.05953	1.01333	0.786288	0.966365	0.998202	0.916951	1.10511	0.250554
B2R7P8	cDNA, FLJ93545, highly similar to Homo sapiens 5-aminoimidazole-4-carboxamide ribonucleotide formyltransferase/IMP cyclohydrolase (ATIC), mRNA OS=Homo sapiens PE=2 SV=1 - [B2R7P8_HUMAN]	5.41	3	3	3	592	64.5944	6.80029	1.23974	0.861366	1.11581	1.07231	0.654039	0.989301	0.992737	0.878692	1.22034	0.288125
O95497	Pantetheinase OS=Homo sapiens GN=VNN1 PE=1 SV=2 - [VNN1_HUMAN]	17.74	8	8	10	513	56.9751	5.5542	0.869401	1.12087	0.894007	0.961425	0.946397	1.1012	0.971183	1.00626	0.955443	0.656036
P80723	Brain acid soluble protein 1 OS=Homo sapiens GN=BASP1 PE=1 SV=2 - [BASP1_HUMAN]	11.89	2	2	4	227	22.68	4.62744	0.792257	1.10751	1.1885	1.02942	0.710381	0.851478	0.695614	0.752491	1.36802	0.101431
O15144	Actin-related protein 2/3 complex subunit 2 OS=Homo sapiens GN=ARPC2 PE=1 SV=1 - [ARPC2_HUMAN]	20	6	6	11	300	34.3115	7.35693	1.04972	0.894048	1.17049	1.03808	0.748055	0.993976	0.984592	0.908874	1.14217	0.318385
P09382	Galectin-1 OS=Homo sapiens GN=LGALS1 PE=1 SV=2 - [LEG1_HUMAN]	19.26	3	3	4	135	14.7062	5.50342	0.913868	0.89874	0.971233	0.927947	0.982037	0.998254	1.17342	1.05124	0.882719	0.131287
O75368	SH3 domain-binding glutamic acid-rich-like protein OS=Homo sapiens GN=SH3BGRL PE=1 SV=1 - [SH3L1_HUMAN]	35.09	5	5	7	114	12.7664	5.24951	1.07961	0.925519	1.05484	1.01999	0.591128	1.05249	0.993021	0.878879	1.16056	0.407365
H3BMH2	Ras-related protein Rab-11A (Fragment) OS=Homo sapiens GN=RAB11A PE=4 SV=1 - [H3BMH2_HUMAN]	11.61	2	2	4	155	17.6571	8.33838	0.98639	0.831437	1.23383	1.01722	0.609304	0.97875	1.41204	1.00003	1.01719	0.950444
A2MYD6	V1-2 protein (Fragment) OS=Homo sapiens GN=V1-2 PE=4 SV=1 - [A2MYD6_HUMAN]	16.16	1	2	8	99	10.3468	5.90967	1.12013	2.25124	0.45935	1.27691	1.12692	1.16743	1.42574	1.24003	1.02974	0.948013
U3KQE2	Calpain small subunit 1 (Fragment) OS=Homo sapiens GN=CAPNS1 PE=1 SV=1 - [U3KQE2_HUMAN]	24.84	3	3	3	161	18.4337	4.91943	1.27586	0.887561	0.970176	1.04453	0.670281	1.16504	1.04725	0.960856	1.08709	0.68285
F5H810	Noelin (Fragment) OS=Homo sapiens GN=OLFM1 PE=1 SV=1 - [F5H810_HUMAN]	21.15	4	4	10	208	24.206	6.41748	0.915114	0.930778	0.998251	0.948048	1.09514	0.982789	1.01979	1.03257	0.918143	0.11293
E5RIW3	Tubulin-specific chaperone A OS=Homo sapiens GN=TBCA PE=1 SV=1 - [E5RIW3_HUMAN]	25	3	3	3	84	10.074	4.62744	1.10576	1.11081	1.1946	1.13706	0.628931	0.959444	0.947754	0.845376	1.34503	0.0598403
Q59H37	Laminin alpha 2 subunit variant (Fragment) OS=Homo sapiens PE=2 SV=1 - [Q59H37_HUMAN]	1.51	3	3	3	1853	204.43	6.37939	0.913991	0.848449	0.988067	0.916836	1.26363	0.876948	1.01676	1.05245	0.871148	0.321689
Q92686	Neurogranin OS=Homo sapiens GN=NRGN PE=1 SV=1 - [NEUG_HUMAN]	19.23	1	1	2	78	7.61366	7.86963	1.05448	1.15748	1.05973	1.09057	0.568207	1.26726	0.884359	0.906608	1.20291	0.419972
A0A024RCB5	Chitinase domain containing 1, isoform CRA_a OS=Homo sapiens GN=CHID1 PE=4 SV=1 - [A0A024RCB5_HUMAN]	3.63	1	1	1	386	44.0898	7.69385	1.06324	0.919489	1.12325	1.03533	0.596593	1.0946	0.951655	0.88095	1.17524	0.389021
Q7RTS7	Keratin, type II cytoskeletal 74 OS=Homo sapiens GN=KRT74 PE=1 SV=2 - [K2C74_HUMAN]	5.1	1	3	10	529	57.8296	7.7085	0.867035	0.737898	1.08834	0.897757	0.914573	0.955798	0.93196	0.93411	0.961082	0.741986
A1L4H1	Soluble scavenger receptor cysteine-rich domain-containing protein SSC5D OS=Homo sapiens GN=SSC5D PE=1 SV=3 - [SRCRL_HUMAN]	2.99	3	3	3	1573	165.639	6.12549	1.06215	0.965598	0.903689	0.977147	1.16549	1.15057	1.0665	1.12752	0.866633	0.0534487
F6VDH7	Hsc70-interacting protein (Fragment) OS=Homo sapiens GN=ST13 PE=1 SV=1 - [F6VDH7_HUMAN]	19.14	3	3	3	162	18.074	4.77979	1.07197	0.985331	1.11399	1.0571	0.576551	1.0748	1.21588	0.955745	1.10605	0.635009
A0A075B6R9	Immunoglobulin kappa variable 2D-24 (non-functional) (Fragment) OS=Homo sapiens GN=IGKV2D-24 PE=4 SV=1 - [A0A075B6R9_HUMAN]	10.83	1	1	2	120	13.0707	8.86572	0.892251	2.56875	0.294195	1.25173	1.2765	1.38009	1.96085	1.53915	0.813263	0.707599
A0A0X9V9B3	MS-F1 light chain variable region (Fragment) OS=Homo sapiens PE=2 SV=1 - [A0A0X9V9B3_HUMAN]	11.61	1	1	3	112	12.1	5.96045	1.23228	1.91219	0.617754	1.25407	0.836988	1.20432	1.62161	1.22097	1.02711	0.943284
Q9UJC5	SH3 domain-binding glutamic acid-rich-like protein 2 OS=Homo sapiens GN=SH3BGRL2 PE=1 SV=2 - [SH3L2_HUMAN]	24.3	2	2	3	107	12.3182	6.7124	1.17206	0.913112	1.18315	1.08944	0.508735	1.10133	0.858671	0.822911	1.32389	0.240038
O43665	Regulator of G-protein signaling 10 OS=Homo sapiens GN=RGS10 PE=1 SV=2 - [RGS10_HUMAN]	16.18	2	2	2	173	20.223	5.49072	1.05784	1.06309	1.21093	1.11062	0.593463	1.01344	0.826763	0.811222	1.36907	0.0849909
V9H0D6	Complement C4A3 (Fragment) OS=Homo sapiens GN=C4A PE=4 SV=1 - [V9H0D6_HUMAN]	28.95	1	1	2	38	4.30918	5.0083	0.951476	1.16233	0.951505	1.02177	1.10437	1.05557	1.27515	1.14503	0.892357	0.271894
P29350	Tyrosine-protein phosphatase non-receptor type 6 OS=Homo sapiens GN=PTPN6 PE=1 SV=1 - [PTN6_HUMAN]	9.24	5	5	7	595	67.5191	7.78174	1.02557	0.980034	1.1955	1.06703	0.662071	1.05073	0.889891	0.867564	1.22992	0.200912
B7ZAL5	cDNA, FLJ79229, highly similar to Lactotransferrin (EC 3.4.21.-) OS=Homo sapiens PE=2 SV=1 - [B7ZAL5_HUMAN]	7.51	5	5	5	666	73.1232	7.78174	0.826869	0.930089	1.07795	0.94497	1.184	0.833504	1.21112	1.07621	0.878057	0.406971
A0A024R5A3	Calpain 1, (Mu/I) large subunit, isoform CRA_b OS=Homo sapiens GN=CAPN1 PE=3 SV=1 - [A0A024R5A3_HUMAN]	11.13	8	8	12	710	81.416	5.74463	1.13224	0.953289	1.12738	1.07097	0.626253	1.01708	0.877728	0.840353	1.27443	0.147425
Q9UNH2	MC51L-53L-54L homolog (Fragment) OS=Homo sapiens PE=4 SV=1 - [Q9UNH2_HUMAN]	4.89	1	1	4	184	19.8162	7.34229	0.94981	0.933948	0.962297	0.948685	1.30653	1.03122	0.913987	1.08391	0.87524	0.310757
A8K1D2	cDNA FLJ76601, highly similar to Homo sapiens LIM and SH3 protein 1 (LASP1), mRNA OS=Homo sapiens PE=2 SV=1 - [A8K1D2_HUMAN]	17.62	5	5	6	261	29.6262	7.37158	1.08324	1.06461	1.19572	1.11452	0.59893	1.04249	0.924836	0.85542	1.3029	0.13543
B4DSV9	cDNA FLJ56632, moderately similar to Target of Nesh-SH3 OS=Homo sapiens PE=2 SV=1 - [B4DSV9_HUMAN]	7.68	6	6	7	1029	113.36	9.56885	0.995092	0.964159	0.985287	0.981513	1.10194	0.990146	0.967121	1.01974	0.962516	0.420552
B4DFP1	cDNA FLJ51818, highly similar to Phosphoglucomutase-1 (EC 5.4.2.2) OS=Homo sapiens PE=2 SV=1 - [B4DFP1_HUMAN]	12.83	6	6	6	538	58.702	6.04932	1.04086	0.94732	1.17543	1.05454	0.598193	1.15169	0.825065	0.858315	1.22862	0.321891
B4DSD8	Alpha-1,4 glucan phosphorylase OS=Homo sapiens PE=2 SV=1 - [B4DSD8_HUMAN]	6.52	5	5	5	752	85.7328	6.16357	1.17306	0.934009	1.11264	1.07324	0.715565	1.06491	0.958464	0.912979	1.17553	0.271834
P14543	Nidogen-1 OS=Homo sapiens GN=NID1 PE=1 SV=3 - [NID1_HUMAN]	7.06	7	8	9	1247	136.291	5.2876	1.01491	1.0881	0.942603	1.0152	0.972917	0.967766	0.934233	0.958305	1.05937	0.262979
B4DM33	cDNA FLJ52068, highly similar to Microtubule-associated protein RP/EB family member 1 OS=Homo sapiens PE=2 SV=1 - [B4DM33_HUMAN]	25.63	4	5	6	238	26.5656	5.2876	1.0488	0.985729	1.04292	1.02582	0.718717	0.993557	0.937779	0.883351	1.16128	0.173944
B4DNJ3	Alpha-amylase OS=Homo sapiens PE=2 SV=1 - [B4DNJ3_HUMAN]	4.95	2	2	2	465	53.3209	5.5415	1.00764	1.12215	1.11914	1.08298	0.832934	1.0049	0.930145	0.92266	1.17376	0.0621232
Q5H9A7	Metalloproteinase inhibitor 1 OS=Homo sapiens GN=TIMP1 PE=1 SV=1 - [Q5H9A7_HUMAN]	32.87	4	4	8	143	16.0468	8.07471	1.00041	0.982883	0.9843	0.989198	1.09624	0.969046	0.999333	1.02154	0.968338	0.451076
P78386	Keratin, type II cuticular Hb5 OS=Homo sapiens GN=KRT85 PE=1 SV=1 - [KRT85_HUMAN]	9.47	2	6	6	507	55.7665	6.55127	0.550612	0.673694	0.540377	0.588228	4.22974	0.56492	0.990178	1.92828	0.305053	0.311603
H0Y532	Selenium-binding protein 1 (Fragment) OS=Homo sapiens GN=SELENBP1 PE=1 SV=8 - [H0Y532_HUMAN]	15.74	4	4	4	305	33.9019	5.64307	0.961404	1.07193	0.898525	0.977287	0.894884	1.02114	1.23667	1.0509	0.929954	0.546634
B2R5M8	Isocitrate dehydrogenase [NADP] OS=Homo sapiens PE=2 SV=1 - [B2R5M8_HUMAN]	11.35	6	6	7	414	46.6195	7.00537	1.03403	1.10589	1.10832	1.08275	0.768394	1.1044	0.906605	0.926467	1.16868	0.19493
B4DM05	cDNA FLJ51241, highly similar to Nidogen-1 OS=Homo sapiens PE=2 SV=1 - [B4DM05_HUMAN]	2.62	1	2	2	726	79.2832	4.97021	0.876931	0.759564	1.27962	0.972037	0.991897	1.06408	1.10827	1.05475	0.921582	0.634695
A0A0X9UWM4	IBM-A3 heavy chain variable region (Fragment) OS=Homo sapiens PE=2 SV=1 - [A0A0X9UWM4_HUMAN]	9.45	1	1	1	127	14.3599	8.36768	1.13416	2.30707	0.665814	1.36902	0.868817	1.15491	1.22686	1.08353	1.26348	0.59872
Q9UQ80	Proliferation-associated protein 2G4 OS=Homo sapiens GN=PA2G4 PE=1 SV=3 - [PA2G4_HUMAN]	7.36	2	2	3	394	43.7592	6.55127	1.0203	0.986552	1.07937	1.02874	0.601009	1.14238	0.990348	0.911246	1.12894	0.512042
Q1KSF8	XTP3TPA-transactivated protein 1 OS=Homo sapiens GN=XTP3TPATP1 PE=2 SV=1 - [Q1KSF8_HUMAN]	10.1	2	2	2	208	23.6107	6.90283	0.995745	0.922815	1.14492	1.02116	0.689212	1.06447	1.05856	0.937413	1.08934	0.582642
Q9GZP8	Immortalization up-regulated protein OS=Homo sapiens GN=IMUP PE=1 SV=1 - [IMUP_HUMAN]	9.43	1	1	2	106	10.8906	9.72998	1.0869	0.893578	1.0198	1.00009	0.461271	1.10771	0.762251	0.777076	1.28699	0.316913
P42574	Caspase-3 OS=Homo sapiens GN=CASP3 PE=1 SV=2 - [CASP3_HUMAN]	11.19	2	2	2	277	31.5875	6.53662	1.03349	1.05924	1.10839	1.06704	0.728518	1.10944	0.965191	0.934384	1.14197	0.306253
Q9Y646	Carboxypeptidase Q OS=Homo sapiens GN=CPQ PE=1 SV=1 - [CBPQ_HUMAN]	4.66	3	3	3	472	51.8545	6.17627	1.02416	0.887838	0.947029	0.953009	1	0.989001	0.930101	0.973034	0.97942	0.679598
B2RBR9	cDNA, FLJ95650, highly similar to Homo sapiens karyopherin (importin) beta 1 (KPNB1), mRNA OS=Homo sapiens PE=2 SV=1 - [B2RBR9_HUMAN]	5.37	3	3	3	876	97.122	4.77979	0.953536	1.01913	1.0861	1.01959	0.713557	1.10265	1.08618	0.967461	1.05388	0.714447
Q5JRR9	Ubiquitin-like modifier-activating enzyme 1 (Fragment) OS=Homo sapiens GN=UBA1 PE=1 SV=8 - [Q5JRR9_HUMAN]	8.89	2	2	2	270	29.1616	4.98291	1.03065	1.07053	1.0968	1.06599	0.66209	1.00468	0.94001	0.868926	1.22679	0.138856
A2NV54	Precursor (AA -19 to 108) (Fragment) OS=Homo sapiens PE=2 SV=1 - [A2NV54_HUMAN]	22.31	1	3	11	130	13.5558	8.17725	0.787817	1.90748	0.556021	1.08377	1.15256	0.906068	1.85931	1.30598	0.829854	0.683051
P35555	Fibrillin-1 OS=Homo sapiens GN=FBN1 PE=1 SV=3 - [FBN1_HUMAN]	1.36	4	4	4	2871	312.022	4.93213	0.884547	1.05482	1.03662	0.991997	0.995277	0.989825	0.960085	0.981729	1.01046	0.861184
B4DL49	cDNA FLJ58073, moderately similar to Cathepsin B (EC 3.4.22.1) OS=Homo sapiens PE=2 SV=1 - [B4DL49_HUMAN]	14.29	3	3	3	273	30.7477	6.62451	0.954916	1.12583	0.91934	1.00003	1.24477	0.896064	0.990056	1.04363	0.958223	0.739104
Q8NDA2	Hemicentin-2 OS=Homo sapiens GN=HMCN2 PE=2 SV=3 - [HMCN2_HUMAN]	0.2	1	1	1	5059	541.639	5.87158	1.06249	0.882443	1.1174	1.02078	1.07254	1.10429	0.924353	1.03373	0.987476	0.892644
B4E0K5	Mitogen-activated protein kinase OS=Homo sapiens GN=MAPK14 PE=1 SV=1 - [B4E0K5_HUMAN]	6.71	1	2	3	283	32.3363	4.91943	1.09834	1.05174	0.979198	1.04309	0.649218	1.10741	1.02124	0.925956	1.1265	0.463902
B4DEA3	cDNA FLJ56531, highly similar to UV excision repair protein RAD23 homolog B OS=Homo sapiens PE=2 SV=1 - [B4DEA3_HUMAN]	6.7	3	3	3	403	42.2834	5.42725	1.04556	0.918213	1.15442	1.0394	0.577745	1.03834	0.955268	0.857119	1.21267	0.311034
O95978	VH1 protein (Fragment) OS=Homo sapiens GN=VH1 PE=4 SV=1 - [O95978_HUMAN]	12.1	1	2	4	157	17.2925	9.78857	0.791368	2.84919	0.3047	1.31508	1.36587	0.905224	2.12628	1.46579	0.897184	0.868987
E9PC71	Hippocalcin-like protein 1 OS=Homo sapiens GN=HPCAL1 PE=1 SV=1 - [E9PC71_HUMAN]	18.29	3	3	5	175	20.2588	5.68115	1.03508	0.951443	1.23758	1.0747	0.555834	0.988616	0.801308	0.781919	1.37444	0.125235
Q5T085	Alpha-amylase 1 (Fragment) OS=Homo sapiens GN=AMY1B PE=1 SV=1 - [Q5T085_HUMAN]	11.95	3	3	3	226	25.5544	7.31299	0.908191	0.985192	1.14269	1.01202	1.12607	1.06652	0.784454	0.992349	1.01983	0.883436
A0A024RDB8	Heparanase, isoform CRA_a OS=Homo sapiens GN=HPSE PE=4 SV=1 - [A0A024RDB8_HUMAN]	3.31	1	1	2	543	61.1381	9.29053	1.00114	1.00661	1.01092	1.00622	0.710326	1.16703	1.23216	1.03651	0.970786	0.862656
P20774	Mimecan OS=Homo sapiens GN=OGN PE=1 SV=1 - [MIME_HUMAN]	10.07	3	3	4	298	33.9009	5.63037	0.853413	1.01001	1.00613	0.956518	1.15124	1.07834	1.01549	1.08169	0.88428	0.125515
A0A024RD39	Platelet-activating factor acetylhydrolase OS=Homo sapiens GN=PLA2G7 PE=4 SV=1 - [A0A024RD39_HUMAN]	9.3	5	5	6	441	50.0173	7.56201	1.17831	0.991062	0.911613	1.027	1.25498	0.918635	0.981595	1.05174	0.976477	0.858365
F5H5G1	Limbic system-associated membrane protein OS=Homo sapiens GN=LSAMP PE=1 SV=2 - [F5H5G1_HUMAN]	9.03	2	2	2	288	31.722	5.90967	0.88463	1.158	1.01934	1.02066	1.02063	1.07978	0.839816	0.980076	1.0414	0.723645
Q8NBJ4	Golgi membrane protein 1 OS=Homo sapiens GN=GOLM1 PE=1 SV=1 - [GOLM1_HUMAN]	10.47	3	3	4	401	45.3058	4.97021	0.833552	1.08417	0.911207	0.942976	1.10508	0.97143	0.948	1.00817	0.935334	0.503421
Q6IBS0	Twinfilin-2 OS=Homo sapiens GN=TWF2 PE=1 SV=2 - [TWF2_HUMAN]	8.02	3	3	3	349	39.5233	6.84424	1.06598	1.01273	1.16042	1.07971	0.581105	1.04096	0.816014	0.812693	1.32856	0.128355
G8JLD5	Dynamin-1-like protein OS=Homo sapiens GN=DNM1L PE=1 SV=1 - [G8JLD5_HUMAN]	8.43	6	6	6	712	79.572	7.07861	1.06254	0.867712	1.08787	1.00604	0.694625	0.918478	0.938481	0.850528	1.18284	0.211381
Q5U000	Cathepsin Z OS=Homo sapiens PE=2 SV=1 - [Q5U000_HUMAN]	5.61	2	2	3	303	33.8462	7.10791	0.82643	0.785627	0.967851	0.859969	1.26918	0.932311	1.06756	1.08968	0.789193	0.110412
A2N0U2	VH6DJ protein (Fragment) OS=Homo sapiens GN=VH6DJ PE=2 SV=1 - [A2N0U2_HUMAN]	14.04	2	3	15	114	12.543	8.47021	1.14678	1.76899	0.687906	1.20123	1.20421	1.13597	1.17371	1.1713	1.02555	0.928625
A0A1C9J6R2	B cell receptor heavy chain variable region (Fragment) OS=Homo sapiens PE=4 SV=1 - [A0A1C9J6R2_HUMAN]	22.73	2	2	6	132	14.5152	8.83643	1.04306	1.35469	0.754796	1.05085	1.09382	1.01546	1.11422	1.0745	0.977989	0.899489
P04066	Tissue alpha-L-fucosidase OS=Homo sapiens GN=FUCA1 PE=1 SV=4 - [FUCO_HUMAN]	2.36	1	1	1	466	53.6547	6.84424	0.782039	0.792083	1.08267	0.885597	1.12062	1.03929	0.986413	1.04877	0.844414	0.198633
A0A218KGR2	Amyloid beta A4 protein isoform a OS=Homo sapiens GN=APP PE=4 SV=1 - [A0A218KGR2_HUMAN]	7.14	5	5	5	770	86.8851	4.83057	1.20006	0.840907	1.12035	1.05378	0.680319	1.10758	1.00529	0.931064	1.1318	0.507191
B4DM63	Actin-related protein 2/3 complex subunit 3 OS=Homo sapiens PE=2 SV=1 - [B4DM63_HUMAN]	11.98	2	2	3	167	19.0489	8.88037	1.09449	0.84967	1.39439	1.11285	0.419372	0.993119	0.91708	0.776524	1.43312	0.232315
P12318	Low affinity immunoglobulin gamma Fc region receptor II-a OS=Homo sapiens GN=FCGR2A PE=1 SV=4 - [FCG2A_HUMAN]	9.78	2	2	5	317	34.9785	6.68311	0.922653	1.11423	0.979624	1.0055	1.01463	1.01328	1.0281	1.01867	0.987075	0.82864
P01833	Polymeric immunoglobulin receptor OS=Homo sapiens GN=PIGR PE=1 SV=4 - [PIGR_HUMAN]	6.81	5	5	5	764	83.2317	5.74463	1.11026	1.94865	0.525776	1.1949	1.22703	1.46541	1.09873	1.26372	0.945537	0.879669
B4DVZ8	Leukotriene A(4) hydrolase OS=Homo sapiens PE=2 SV=1 - [B4DVZ8_HUMAN]	10.16	5	5	6	561	63.7894	5.8335	0.966101	1.09013	1.13946	1.06523	0.770291	0.971561	0.976679	0.906177	1.17552	0.135706
H3BLU7	Aflatoxin B1 aldehyde reductase member 2 (Fragment) OS=Homo sapiens GN=AKR7A2 PE=1 SV=1 - [H3BLU7_HUMAN]	9.87	2	2	3	314	34.6622	7.18115	1.08698	1.16206	1.00494	1.08466	0.775098	0.883155	1.12389	0.927382	1.1696	0.23509
E9PNW4	CD59 glycoprotein OS=Homo sapiens GN=CD59 PE=1 SV=1 - [E9PNW4_HUMAN]	7.41	1	1	2	108	11.9765	5.74463	1.01015	0.851904	0.928211	0.930089	1.05975	0.956803	1.19199	1.06951	0.869637	0.164221
B3KQF5	cDNA FLJ90381 fis, clone NT2RP2005035, highly similar to Calumenin OS=Homo sapiens PE=2 SV=1 - [B3KQF5_HUMAN]	20.95	6	6	6	315	36.9956	4.66553	1.05998	0.994901	1.2031	1.08599	0.661148	0.960685	0.953636	0.85849	1.265	0.122046
F8WE71	Serine/threonine-protein phosphatase PP1-beta catalytic subunit OS=Homo sapiens GN=PPP1CB PE=1 SV=1 - [F8WE71_HUMAN]	26.56	1	1	1	64	6.93966	5.24951	1.11423	0.959409	1.10917	1.06094	0.906162	1.20019	1.02019	1.04218	1.018	0.859684
B7UCU6	Gamma-globin chain (Fragment) OS=Homo sapiens GN=HBG2 PE=3 SV=1 - [B7UCU6_HUMAN]	18.1	1	2	3	105	11.5789	6.68311	0.916994	1.44212	0.681062	1.01339	1.01063	1.24295	1.56589	1.27316	0.795967	0.40084
Q68BL8	Olfactomedin-like protein 2B OS=Homo sapiens GN=OLFML2B PE=2 SV=2 - [OLM2B_HUMAN]	0.8	1	1	5	750	83.9466	5.19873	0.857619	0.866312	1.0161	0.913343	1.12864	0.939435	1.07653	1.0482	0.871343	0.152104
F5H6R7	Ras-related protein Rap-1b (Fragment) OS=Homo sapiens GN=RAP1B PE=1 SV=1 - [F5H6R7_HUMAN]	21.31	2	2	2	122	13.7438	4.58936	1.03689	0.659705	1.22449	0.973695	0.861101	1.05111	0.592494	0.834902	1.16624	0.549822
P08493	Matrix Gla protein OS=Homo sapiens GN=MGP PE=1 SV=2 - [MGP_HUMAN]	10.68	1	1	1	103	12.3453	9.67139	0.601568	0.839483	1.5109	0.983985	1.04339	0.806304	0.707909	0.852534	1.15419	0.673743
B3KR50	cDNA FLJ33691 fis, clone BRAWH2002976, highly similar to GROWTH FACTOR RECEPTOR-BOUND PROTEIN 2 OS=Homo sapiens PE=2 SV=1 - [B3KR50_HUMAN]	13.36	3	3	3	217	25.1784	6.31592	1.02909	1.32225	1.03342	1.12825	0.802274	1.03526	1.12764	0.988393	1.1415	0.365175
D6RF86	Cadherin-6 OS=Homo sapiens GN=CDH6 PE=1 SV=1 - [D6RF86_HUMAN]	3.95	2	2	2	608	67.3607	4.88135	0.856721	1.33142	0.929029	1.03906	1.00232	1.11585	0.926881	1.01502	1.02368	0.886113
E6Y365	Met proto-oncogene variant I OS=Homo sapiens PE=2 SV=1 - [E6Y365_HUMAN]	3.1	3	3	4	934	104.219	7.45947	0.934572	1.30827	1.0599	1.10091	0.87526	0.960951	0.768308	0.868173	1.26808	0.131741
P23470	Receptor-type tyrosine-protein phosphatase gamma OS=Homo sapiens GN=PTPRG PE=1 SV=4 - [PTPRG_HUMAN]	2.21	3	3	3	1445	161.901	6.41748	1.00204	0.942899	1.10356	1.01616	1.10046	0.934741	0.888269	0.97449	1.04276	0.62857
P24844	Myosin regulatory light polypeptide 9 OS=Homo sapiens GN=MYL9 PE=1 SV=4 - [MYL9_HUMAN]	6.4	1	1	1	172	19.8144	4.91943	0.850832	0.849068	1.41222	1.03737	0.46039	0.774041	0.982122	0.738851	1.40404	0.283327
Q5T3N1	Annexin (Fragment) OS=Homo sapiens GN=ANXA1 PE=1 SV=1 - [Q5T3N1_HUMAN]	10.78	2	2	2	204	22.7408	5.52881	0.905131	1.03157	1.35964	1.09878	0.5811	1.02523	1.02953	0.87862	1.25057	0.335293
Q9NY97	N-acetyllactosaminide beta-1,3-N-acetylglucosaminyltransferase 2 OS=Homo sapiens GN=B3GNT2 PE=1 SV=2 - [B3GN2_HUMAN]	9.07	3	3	4	397	45.9926	8.54346	1.03459	0.963337	0.936001	0.977974	1.13913	0.89723	1.03979	1.02538	0.953766	0.567077
H3BPL6	Sulfotransferase (Fragment) OS=Homo sapiens GN=SULT1A3 PE=1 SV=1 - [H3BPL6_HUMAN]	10.37	1	1	1	135	15.8749	5.94775	1.14108	0.966375	1.15153	1.08633	0.657864	1.15596	0.877945	0.897257	1.21072	0.29254
B5BUI8	Dual specificity phosphatase 3 (Fragment) OS=Homo sapiens GN=DUSP3 PE=2 SV=1 - [B5BUI8_HUMAN]	12.97	2	2	2	185	20.5644	8.14795	1.05936	0.946839	1.12225	1.04282	0.787748	1.03435	1.05228	0.958128	1.08839	0.442997
P24593	Insulin-like growth factor-binding protein 5 OS=Homo sapiens GN=IGFBP5 PE=1 SV=1 - [IBP5_HUMAN]	15.07	4	4	4	272	30.55	8.20654	0.919536	1.04686	0.976792	0.981061	1.16439	0.925654	1.09179	1.06061	0.924996	0.374568
K7ESE8	Bleomycin hydrolase (Fragment) OS=Homo sapiens GN=BLMH PE=1 SV=1 - [K7ESE8_HUMAN]	5.63	1	1	2	231	26.7211	6.78564	0.991254	1.06012	1.09244	1.04794	0.92431	0.982644	0.965707	0.957554	1.09439	0.0588254
D6RC54	Calpastatin (Fragment) OS=Homo sapiens GN=CAST PE=1 SV=1 - [D6RC54_HUMAN]	16.48	1	1	1	91	10.03	4.51318	1.05868	0.910559	1.00337	0.99087	1.19208	0.980708	0.928726	1.03384	0.958439	0.662745
Q9HBR0	Putative sodium-coupled neutral amino acid transporter 10 OS=Homo sapiens GN=SLC38A10 PE=1 SV=2 - [S38AA_HUMAN]	1.34	1	1	1	1119	119.687	5.73193	0.834778	1.32045	1.24451	1.13324	0.839044	0.989869	0.89831	0.909074	1.24659	0.226729
A8KAK1	cDNA FLJ77398, highly similar to Homo sapiens UDP-glucose ceramide glucosyltransferase-like 1, transcript variant 2, mRNA OS=Homo sapiens PE=2 SV=1 - [A8KAK1_HUMAN]	1.44	2	2	2	1531	174.897	5.51611	1.01954	1.06042	1.12474	1.06823	0.64169	1.05422	0.934211	0.876706	1.21846	0.203931
P43686	26S proteasome regulatory subunit 6B OS=Homo sapiens GN=PSMC4 PE=1 SV=2 - [PRS6B_HUMAN]	4.31	1	1	1	418	47.3365	5.21143	1.15159	0.897515	1.29235	1.11382	0.564066	0.858993	1.1265	0.849853	1.3106	0.256001
Q8N1N4	Keratin, type II cytoskeletal 78 OS=Homo sapiens GN=KRT78 PE=1 SV=2 - [K2C78_HUMAN]	5.38	1	4	6	520	56.8305	6.02393	0.695166	0.593075	1.24781	0.84535	0.860193	1.18095	0.840048	0.960396	0.88021	0.645185
B7Z6V5	cDNA FLJ50240, highly similar to ADAM DEC1 (EC 3.4.24.-) (Adisintegrin and metalloproteinase domain-like protein decysin 1) OS=Homo sapiens PE=2 SV=1 - [B7Z6V5_HUMAN]	7.16	2	2	2	391	43.5015	7.00537	1.00684	1.20741	0.900531	1.03826	1.05481	0.978656	1.10908	1.04751	0.991167	0.929028
D6W633	Protein tyrosine phosphatase, receptor type, S, isoform CRA_a OS=Homo sapiens GN=PTPRS PE=4 SV=1 - [D6W633_HUMAN]	2.44	2	2	2	1310	143.342	6.23975	1.16752	1.05987	1.48657	1.23799	1.19114	1.06598	0.891154	1.04943	1.17968	0.290281
B7ZLI0	Reticulon 4 receptor-like 2 OS=Homo sapiens GN=RTN4RL2 PE=2 SV=1 - [B7ZLI0_HUMAN]	3.81	2	2	2	420	46.1046	7.62061	0.889594	0.893867	0.978048	0.920503	1.00608	1.14262	1.03321	1.06064	0.867876	0.0506563
E1U340	ZNF511/PRAP1 fusion protein OS=Homo sapiens PE=2 SV=1 - [E1U340_HUMAN]	13.55	3	3	3	310	35.1644	5.93506	0.750085	0.891289	1.05024	0.897206	1.16633	1.04069	1.09187	1.09963	0.815914	0.0977489
B4DEK5	cDNA FLJ54596, highly similar to Proactivator polypeptide OS=Homo sapiens PE=2 SV=1 - [B4DEK5_HUMAN]	6.86	3	3	3	452	50.617	4.97021	0.970341	1.06313	0.884816	0.972763	0.998407	1.02163	1.02315	1.01439	0.958959	0.46907
Q496C9	D-aminoacyl-tRNA deacylase OS=Homo sapiens GN=DTD1 PE=2 SV=1 - [Q496C9_HUMAN]	3.35	1	1	1	209	23.469	8.35303	1.12102	0.922874	1.21975	1.08788	0.436532	0.965952	0.710842	0.704442	1.54432	0.0949293
A2NYU9	Heavy chain Fab (Fragment) OS=Homo sapiens PE=2 SV=1 - [A2NYU9_HUMAN]	13.93	2	2	5	122	13.5438	9.48096	0.753968	2.40962	0.425904	1.1965	1.68818	1.10229	1.33694	1.3758	0.869675	0.79233
B4DLJ7	cDNA FLJ59334, highly similar to Transmembrane glycoprotein NMB OS=Homo sapiens PE=2 SV=1 - [B4DLJ7_HUMAN]	5.25	2	2	3	514	57.1758	6.771	0.961591	1.27918	0.79954	1.01344	1.22979	0.969034	1.30398	1.1676	0.867967	0.424857
O00194	Ras-related protein Rab-27B OS=Homo sapiens GN=RAB27B PE=1 SV=4 - [RB27B_HUMAN]	9.63	2	2	2	218	24.5922	5.51611	0.999595	0.742632	1.32453	1.02225	0.529318	1.04269	1.31153	0.961179	1.06354	0.840577
Q5NV65	V1-5 protein (Fragment) OS=Homo sapiens GN=V1-5 PE=4 SV=1 - [Q5NV65_HUMAN]	13.13	1	1	1	99	10.3769	4.81787	1.04483	3.43369	0.336352	1.60496	0.912556	0.933513	1.57457	1.14021	1.40759	0.654217
P05556	Integrin beta-1 OS=Homo sapiens GN=ITGB1 PE=1 SV=2 - [ITB1_HUMAN]	6.64	5	5	6	798	88.357	5.38916	0.970586	1.068	1.04445	1.02768	1.05878	0.943466	0.960154	0.987469	1.04072	0.435348
Q5HYG2	Uncharacterized protein DKFZp686H0286 OS=Homo sapiens GN=DKFZp686H0286 PE=2 SV=1 - [Q5HYG2_HUMAN]	15.28	1	1	1	72	8.42748	10.2573	0.84895	0.825406	1.19844	0.957598	1.01875	0.995636	0.90628	0.973554	0.98361	0.904881
Q15828	Cystatin-M OS=Homo sapiens GN=CST6 PE=1 SV=1 - [CYTM_HUMAN]	14.09	2	2	2	149	16.5004	8.08936	0.85601	1.1625	1.06844	1.02898	0.983889	1.01425	1.01913	1.00576	1.02309	0.811782
Q9NTU7	Cerebellin-4 OS=Homo sapiens GN=CBLN4 PE=1 SV=1 - [CBLN4_HUMAN]	5.97	1	1	2	201	21.7944	8.73389	0.851071	1.19155	1.15311	1.06524	0.879288	0.930367	0.901951	0.903869	1.17854	0.211718
B4DNX5	cDNA FLJ59941, highly similar to Drebrin-like protein OS=Homo sapiens PE=2 SV=1 - [B4DNX5_HUMAN]	26.62	3	3	4	139	15.5117	6.34131	1.06351	0.965308	1.15864	1.06249	0.619087	0.929047	0.848534	0.798889	1.32995	0.071743
Q6AI18	Uncharacterized protein DKFZp686M148 (Fragment) OS=Homo sapiens GN=DKFZp686M148 PE=2 SV=1 - [Q6AI18_HUMAN]	14.19	2	2	3	155	16.3379	8.55811	0.954373	1.15278	1.06616	1.05777	0.758585	0.992639	0.965852	0.905692	1.16791	0.179672
B4E3Q1	cDNA FLJ61580, highly similar to Calsyntenin-1 OS=Homo sapiens PE=2 SV=1 - [B4E3Q1_HUMAN]	2.91	2	2	2	962	107.748	4.97021	0.883615	0.955761	1.03901	0.959463	1.08431	1.03978	0.955856	1.02665	0.93456	0.315511
M0R1A1	Syntaxin-binding protein 2 (Fragment) OS=Homo sapiens GN=STXBP2 PE=1 SV=1 - [M0R1A1_HUMAN]	7.73	2	2	3	220	24.6007	7.1665	1.12701	0.973958	1.19752	1.0995	0.422018	1.02534	0.919247	0.788869	1.39376	0.190559
Q9BS26	Endoplasmic reticulum resident protein 44 OS=Homo sapiens GN=ERP44 PE=1 SV=1 - [ERP44_HUMAN]	6.16	2	2	2	406	46.9414	5.26221	1.19898	1.07375	1.06018	1.11097	0.979305	1.27211	1.07715	1.10952	1.0013	0.988794
B7Z6Y5	cDNA FLJ58696, highly similar to Endoglin OS=Homo sapiens PE=2 SV=1 - [B7Z6Y5_HUMAN]	5.88	3	3	5	476	51.121	7.28369	1.06602	1.0147	0.920656	1.00046	1.11347	1.03779	1.01494	1.0554	0.947939	0.349808
Q7Z3B1	Neuronal growth regulator 1 OS=Homo sapiens GN=NEGR1 PE=1 SV=3 - [NEGR1_HUMAN]	3.67	1	1	1	354	38.6943	6.21436	0.9227	0.969108	0.988525	0.960111	1.13809	1.03185	1.00031	1.05675	0.908553	0.10369
Q86SQ4	Adhesion G-protein coupled receptor G6 OS=Homo sapiens GN=ADGRG6 PE=1 SV=3 - [AGRG6_HUMAN]	2.21	3	3	3	1221	136.607	7.86963	1.01421	1.01444	0.930419	0.986356	1.05977	1.0255	0.941198	1.00882	0.977731	0.643696
A5PKX5	Alpha-mannosidase OS=Homo sapiens GN=MAN2A1 PE=2 SV=1 - [A5PKX5_HUMAN]	3.41	5	5	5	1143	130.954	7.57666	0.88766	0.99163	0.944438	0.941243	0.974223	1.09581	1.02098	1.03034	0.913529	0.127527
B7Z2T1	cDNA FLJ58061, highly similar to Eukaryotic translation initiation factor 4E OS=Homo sapiens PE=2 SV=1 - [B7Z2T1_HUMAN]	8.09	1	1	1	136	16.279	5.90967	1.16385	0.854988	1.2606	1.09315	0.425229	1.00281	0.927887	0.78531	1.39199	0.232065
P26641	Elongation factor 1-gamma OS=Homo sapiens GN=EEF1G PE=1 SV=3 - [EF1G_HUMAN]	8.01	3	3	3	437	50.0871	6.66846	1.03689	0.965317	1.08522	1.02914	0.662967	1.08112	1.10941	0.951163	1.08198	0.627204
A0A172Q3A0	Fibroblast activation protein (Fragment) OS=Homo sapiens PE=2 SV=1 - [A0A172Q3A0_HUMAN]	2.05	1	2	15	733	84.8221	6.55127	0.995871	1.01386	0.926317	0.978681	1.08	1.12097	0.897777	1.03292	0.947493	0.502114
P28070	Proteasome subunit beta type-4 OS=Homo sapiens GN=PSMB4 PE=1 SV=4 - [PSB4_HUMAN]	3.79	1	1	1	264	29.1855	5.97314	1.01411	1.26183	1.00336	1.0931	0.762881	0.942542	1.05942	0.921614	1.18607	0.228376
Q7Z4G9	HBxAg-binding protein OS=Homo sapiens GN=HBXBP PE=2 SV=1 - [Q7Z4G9_HUMAN]	4.58	2	2	3	306	34.6328	6.29053	0.822916	0.946926	1.05474	0.941527	1.00134	0.851086	0.947134	0.933188	1.00894	0.92209
E9PP76	Copper chaperone for superoxide dismutase (Fragment) OS=Homo sapiens GN=CCS PE=1 SV=1 - [E9PP76_HUMAN]	19.12	1	1	1	68	7.28061	4.83057	0.97579	0.874974	1.27998	1.04358	0.790511	1.0058	0.874493	0.890267	1.17221	0.325469
P41226	Ubiquitin-like modifier-activating enzyme 7 OS=Homo sapiens GN=UBA7 PE=1 SV=2 - [UBA7_HUMAN]	1.58	1	1	1	1012	111.624	6.03662	1.15622	1.06244	1.06088	1.09318	0.59757	1.13389	0.913664	0.881708	1.23984	0.253794
K7EQ48	Glucose-6-phosphate isomerase OS=Homo sapiens GN=GPI PE=1 SV=2 - [K7EQ48_HUMAN]	9.49	6	6	10	474	53.3682	8.67529	1.05704	0.993798	1.14274	1.06452	0.707723	1.01372	0.92749	0.882979	1.20561	0.146067
Q9Y6Z7	Collectin-10 OS=Homo sapiens GN=COLEC10 PE=1 SV=2 - [COL10_HUMAN]	12.27	4	4	5	277	30.6853	7.32764	0.855393	1.09041	1.00839	0.98473	1.11054	1.01166	0.994007	1.03873	0.948009	0.525951
Q5NV84	V1-3 protein (Fragment) OS=Homo sapiens GN=V1-3 PE=4 SV=1 - [Q5NV84_HUMAN]	16.16	1	2	5	99	10.4859	7.06396	1.26877	1.82002	0.366378	1.15173	1.07511	1.95769	1.29692	1.44324	0.798012	0.591002
H0YMZ1	Proteasome subunit alpha type (Fragment) OS=Homo sapiens GN=PSMA4 PE=1 SV=8 - [H0YMZ1_HUMAN]	11.82	3	3	4	220	24.5104	6.771	1.11046	1.11742	0.949015	1.05897	0.848079	0.950807	1.06752	0.95547	1.10832	0.285059
Q8NC59	cDNA FLJ32620 fis, clone STOMA2000386, highly similar to TBC1 domain family member 1 OS=Homo sapiens PE=2 SV=1 - [Q8NC59_HUMAN]	4.15	1	1	2	265	30.7848	5.07178	0.81362	1.00729	0.926584	0.915831	1.33259	0.980219	0.949865	1.08756	0.842098	0.272461
P30086	Phosphatidylethanolamine-binding protein 1 OS=Homo sapiens GN=PEBP1 PE=1 SV=3 - [PEBP1_HUMAN]	16.58	3	3	4	187	21.0437	7.53271	1.07835	1.01806	1.0755	1.0573	0.689978	1.07311	0.926507	0.89653	1.17933	0.228981
C9J3N8	Heat shock protein beta-1 OS=Homo sapiens GN=HSPB1 PE=1 SV=1 - [C9J3N8_HUMAN]	27.03	1	1	1	37	3.88598	5.021	0.697389	0.830917	1.44947	0.99259	0.681524	0.743464	1.49297	0.972653	1.0205	0.95716
B4DTV3	cDNA FLJ57199, highly similar to Probable G-protein coupled receptor 116 OS=Homo sapiens PE=2 SV=1 - [B4DTV3_HUMAN]	4.55	4	4	4	901	99.5245	7.38623	0.995554	0.953487	0.922951	0.957331	1.16685	0.885458	0.978563	1.01029	0.947579	0.568744
P00390	Glutathione reductase, mitochondrial OS=Homo sapiens GN=GSR PE=1 SV=2 - [GSHR_HUMAN]	5.56	3	3	5	522	56.221	8.49951	0.965285	1.0717	1.05228	1.02976	1.00243	0.946924	0.972841	0.974065	1.05717	0.201143
Q9BZQ0	Follistatin-related protein (Fragment) OS=Homo sapiens PE=2 SV=1 - [Q9BZQ0_HUMAN]	9.52	1	1	1	126	14.3257	4.70361	0.956996	1.19743	0.875098	1.00984	0.764681	1.17045	0.82671	0.920615	1.09692	0.604632
B7ZMJ3	ADAMTSL4 protein OS=Homo sapiens GN=ADAMTSL4 PE=2 SV=1 - [B7ZMJ3_HUMAN]	2.71	3	3	3	1035	111.96	8.27979	0.895321	0.916139	1.11275	0.974736	1.05342	0.985577	0.818304	0.952433	1.02342	0.831777
P14174	Macrophage migration inhibitory factor OS=Homo sapiens GN=MIF PE=1 SV=4 - [MIF_HUMAN]	7.83	1	1	2	115	12.4682	7.88428	1.28335	0.924565	0.928888	1.0456	0.59912	1.08347	0.977699	0.886764	1.17912	0.448151
P35579	Myosin-9 OS=Homo sapiens GN=MYH9 PE=1 SV=4 - [MYH9_HUMAN]	1.07	2	2	2	1960	226.392	5.60498	0.841496	0.673527	1.20111	0.905376	0.707089	1.13303	1.47538	1.10516	0.819223	0.50232
B2R5J8	C-C motif chemokine OS=Homo sapiens PE=2 SV=1 - [B2R5J8_HUMAN]	39.56	4	4	4	91	10.0111	9.0708	0.761693	0.769769	1.3682	0.966553	0.522852	0.678786	0.695422	0.632353	1.5285	0.183758
G1FM90	Anti-Influenza A hemagglutinin heavy chain variable region (Fragment) OS=Homo sapiens PE=2 SV=1 - [G1FM90_HUMAN]	22.48	2	3	8	129	14.5101	8.42627	1.02535	2.0098	0.541108	1.19209	1.2659	1.1757	1.40997	1.28386	0.928519	0.844085
I6L8B7	Fatty acid-binding protein, epidermal OS=Homo sapiens GN=FABP5 PE=1 SV=1 - [I6L8B7_HUMAN]	8.91	1	1	1	101	11.2495	6.07471	0.835396	0.904932	1.11062	0.950317	0.544386	0.9405	1.32868	0.937855	1.01329	0.96124
B4DZX0	cDNA FLJ52898, highly similar to Nucleobindin-1 OS=Homo sapiens PE=2 SV=1 - [B4DZX0_HUMAN]	8.39	3	3	3	441	51.5892	5.31299	0.886898	1.10225	0.985906	0.991683	1.14476	0.879149	0.96538	0.996428	0.995238	0.964419
B4DKJ4	cDNA FLJ57738, highly similar to Translationally-controlled tumor protein OS=Homo sapiens PE=2 SV=1 - [B4DKJ4_HUMAN]	14.79	2	2	2	142	16.0938	4.67822	1.02251	0.974455	1.31231	1.10309	0.489022	0.91302	0.938604	0.780215	1.41383	0.147248
A0A0A0MS15	Immunoglobulin heavy variable 3-49 OS=Homo sapiens GN=IGHV3-49 PE=3 SV=1 - [HV349_HUMAN]	7.56	1	1	1	119	13.0475	8.6167	1.15768	2.66275	0.160094	1.32684	1.03116	1.30547	2.56193	1.63285	0.81259	0.741849
Q75MU1	Uncharacterized protein WBSCR1 (Fragment) OS=Homo sapiens GN=WBSCR1 PE=4 SV=1 - [Q75MU1_HUMAN]	14.71	2	2	2	136	14.9513	5.42725	1.03224	0.800725	1.21565	1.01621	0.549673	0.977051	0.941893	0.822872	1.23495	0.348311
B3KTG4	cDNA FLJ38197 fis, clone FCBBF1000367, highly similar to Ubiquitin carboxyl-terminal hydrolase 14 (EC 3.1.2.15) OS=Homo sapiens PE=2 SV=1 - [B3KTG4_HUMAN]	5.6	2	2	2	375	42.6867	7.53271	0.945103	1.19673	1.14444	1.09542	0.64991	1.00644	0.953171	0.869839	1.25934	0.169865
B1AP15	CD55 antigen, decay accelerating factor for complement (Cromer blood group), isoform CRA_d OS=Homo sapiens GN=CD55 PE=1 SV=1 - [B1AP15_HUMAN]	5.05	2	2	2	317	34.0118	6.37939	1.03144	0.98615	0.889567	0.969052	1.19836	1.00003	0.990517	1.06297	0.911646	0.30357
I3L3Q4	Glyoxalase domain-containing protein 4 (Fragment) OS=Homo sapiens GN=GLOD4 PE=1 SV=1 - [I3L3Q4_HUMAN]	8.81	2	2	2	227	25.4836	7.00537	1.04408	0.935755	1.06701	1.01562	0.73104	0.982686	1.03285	0.915524	1.10933	0.381024
C9JUG7	F-actin-capping protein subunit alpha-2 OS=Homo sapiens GN=CAPZA2 PE=1 SV=1 - [C9JUG7_HUMAN]	15.07	1	2	3	146	16.6883	5.10986	0.985027	0.934121	1.1254	1.01485	0.800648	0.990303	1.05115	0.947368	1.07123	0.515326
H0YAP2	Polyadenylate-binding protein 1 (Fragment) OS=Homo sapiens GN=PABPC1 PE=1 SV=1 - [H0YAP2_HUMAN]	7.63	1	1	1	131	15.1459	9.64209	0.885796	0.84618	1.22811	0.986696	0.38263	1.08087	0.925036	0.796178	1.23929	0.478348
Q5JXI8	Four and a half LIM domains protein 1 (Fragment) OS=Homo sapiens GN=FHL1 PE=1 SV=1 - [Q5JXI8_HUMAN]	14.79	4	4	5	257	29.1405	8.26514	1.09482	1.20934	0.950564	1.08491	0.748467	1.11009	1.10652	0.988361	1.09768	0.532225
K7ERZ3	Perilipin-3 (Fragment) OS=Homo sapiens GN=PLIN3 PE=1 SV=1 - [K7ERZ3_HUMAN]	9.25	2	2	2	292	31.9632	5.13525	1.06382	1.18966	1.09852	1.11733	0.770227	1.03723	0.814454	0.873971	1.27846	0.0551233
F5H0D2	Coronin (Fragment) OS=Homo sapiens GN=CORO1B PE=1 SV=2 - [F5H0D2_HUMAN]	6.47	1	1	1	139	15.2738	6.88818	1.01904	1.02752	1.10317	1.04991	0.613797	1.0673	1.02481	0.90197	1.16402	0.371347
Q5NV89	V1-7 protein (Fragment) OS=Homo sapiens GN=V1-7 PE=4 SV=1 - [Q5NV89_HUMAN]	16.16	2	2	2	99	10.2798	7.06396	0.879579	3.1362	0.400848	1.47221	0.949997	1.30187	1.11384	1.1219	1.31224	0.701214
B5MBZ8	Protein phosphatase 1 regulatory subunit 7 OS=Homo sapiens GN=PPP1R7 PE=1 SV=1 - [B5MBZ8_HUMAN]	6.57	1	1	1	274	31.338	4.62744	1.23038	1.02242	0.923197	1.05867	0.881507	1.14302	1.11947	1.048	1.01018	0.935146
P23381	Tryptophan--tRNA ligase, cytoplasmic OS=Homo sapiens GN=WARS PE=1 SV=2 - [SYWC_HUMAN]	1.7	1	1	1	471	53.1316	6.22705	1.02125	0.871661	1.03847	0.97713	0.889901	1.06209	0.95526	0.969084	1.0083	0.917514
S4R457	Heterogeneous nuclear ribonucleoprotein K OS=Homo sapiens GN=HNRNPK PE=1 SV=1 - [S4R457_HUMAN]	10.39	1	1	1	77	8.78126	4.88135	0.93298	0.908993	1.19717	1.01305	0.630311	0.984471	1.00143	0.872069	1.16166	0.406676
A0A0X9T7Y9	IBM-A2 heavy chain variable region (Fragment) OS=Homo sapiens PE=2 SV=1 - [A0A0X9T7Y9_HUMAN]	6.4	1	1	2	125	13.817	9.29053	0.997008	2.73175	0.418886	1.38255	1.59091	0.933764	1.51527	1.34665	1.02666	0.962893
I3L3E9	Flap endonuclease 1 (Fragment) OS=Homo sapiens GN=FEN1 PE=1 SV=1 - [I3L3E9_HUMAN]	4.55	1	1	1	154	17.8983	5.90967	0.94219	1.01104	0.880477	0.944569	0.929472	0.996597	0.922366	0.949479	0.99483	0.917491
B6EDE2	Epididymis luminal protein 180 (Fragment) OS=Homo sapiens GN=HEL180 PE=2 SV=1 - [B6EDE2_HUMAN]	17.89	1	2	2	123	13.2795	5.45264	1	2.31448	0.637311	1.31726	1.04502	0.889848	1.29141	1.07543	1.22487	0.667667
P25774	Cathepsin S OS=Homo sapiens GN=CTSS PE=1 SV=3 - [CATS_HUMAN]	5.44	2	2	2	331	37.4713	8.33838	0.938127	1.03125	0.994039	0.987807	1.03067	1.09575	0.984632	1.03702	0.952547	0.307244
B2R960	cDNA, FLJ94230, highly similar to Homo sapiens thioredoxin-like 1 (TXNL1), mRNA OS=Homo sapiens PE=2 SV=1 - [B2R960_HUMAN]	10.73	2	2	2	289	32.2167	4.95752	1.03144	0.93864	1.11788	1.02932	0.614832	1.10721	0.986981	0.903009	1.13988	0.466148
H3BR99	Synaptosomal-associated protein 23 (Fragment) OS=Homo sapiens GN=SNAP23 PE=1 SV=1 - [H3BR99_HUMAN]	11.11	1	1	1	90	10.2741	6.52197	1.02906	0.945158	1.10115	1.02512	0.708236	0.995297	0.97384	0.892458	1.14865	0.266163
Q9UL82	Myosin-reactive immunoglobulin light chain variable region (Fragment) OS=Homo sapiens PE=2 SV=1 - [Q9UL82_HUMAN]	16.82	2	2	9	107	11.4377	6.59521	0.765155	2.90724	0.300513	1.3243	1.64189	1.05643	1.63945	1.44592	0.915888	0.890072
Q05DH1	Proteasome subunit alpha type (Fragment) OS=Homo sapiens GN=PSMA7 PE=2 SV=1 - [Q05DH1_HUMAN]	13.45	3	3	3	238	26.6971	8.86572	1.02906	1.08806	1.05454	1.05722	0.810213	0.904681	0.999466	0.904787	1.16847	0.0562184
Q96H15	T-cell immunoglobulin and mucin domain-containing protein 4 OS=Homo sapiens GN=TIMD4 PE=1 SV=2 - [TIMD4_HUMAN]	1.85	1	1	2	378	41.5518	6.1001	0.889772	1.10394	0.887564	0.960427	1.05997	0.937508	0.99911	0.998862	0.961521	0.655993
M0QZK8	Uncharacterized protein OS=Homo sapiens PE=4 SV=1 - [M0QZK8_HUMAN]	9.71	1	1	1	103	11.5708	4.91943	1.10028	0.748183	1.25074	1.03307	0.697987	0.846132	0.962289	0.835469	1.23651	0.303267
F2Z2K0	NSFL1 cofactor p47 OS=Homo sapiens GN=NSFL1C PE=1 SV=1 - [F2Z2K0_HUMAN]	9.85	2	2	2	274	30.2019	5.09717	1.0531	0.979207	1.31844	1.11692	0.477612	1.07986	0.926487	0.827987	1.34895	0.23712
B4DMV9	cDNA FLJ53363, highly similar to EH-domain-containing protein 1 OS=Homo sapiens PE=2 SV=1 - [B4DMV9_HUMAN]	5.68	1	3	3	475	53.7352	7.40088	0.99808	0.960855	1.14143	1.03345	0.718479	1.05439	0.972737	0.915202	1.12921	0.36251
Q59FI0	Aconitase 1 variant (Fragment) OS=Homo sapiens PE=3 SV=1 - [Q59FI0_HUMAN]	1.02	1	1	1	781	86.2231	6.27783	0.99232	1.17673	0.999306	1.05612	0.646128	1.07768	0.998828	0.907544	1.16371	0.365664
B7Z2R3	cDNA FLJ59510, highly similar to Homo sapiens tight junction protein 2 (TJP2), transcript variant 2, mRNA OS=Homo sapiens PE=2 SV=1 - [B7Z2R3_HUMAN]	1.08	1	1	1	1020	115.112	6.7124	1.02783	0.716754	1.23703	0.993871	0.521248	0.883445	1.21037	0.871687	1.14017	0.650496
C9JEE0	Immunoglobulin lambda-like polypeptide 1 (Fragment) OS=Homo sapiens GN=IGLL1 PE=1 SV=1 - [C9JEE0_HUMAN]	3.89	1	1	2	180	19.2149	10.6821	0.896191	1.80434	0.714826	1.13845	1.23139	1.05342	1.39368	1.22616	0.928467	0.815017
B5BU41	Calcium/calmodulin-dependent protein kinase I OS=Homo sapiens GN=CAMK1 PE=2 SV=1 - [B5BU41_HUMAN]	3.51	1	1	1	370	41.2527	5.35107	0.990906	1.05942	1.2586	1.10297	0.661089	1.16549	0.782804	0.869795	1.26808	0.246391
A0A0F7TAG7	IGHV3-72 protein (Fragment) OS=Homo sapiens GN=IGHV3-72 PE=4 SV=1 - [A0A0F7TAG7_HUMAN]	17.48	1	2	10	103	11.6685	8.41162	0.894633	2.58853	0.421048	1.3014	1.41971	0.938882	1.88646	1.41502	0.919707	0.881037
Q9NPR2	Semaphorin-4B OS=Homo sapiens GN=SEMA4B PE=1 SV=3 - [SEM4B_HUMAN]	3.85	3	3	3	832	92.1347	6.94678	0.986242	1.1526	0.792622	0.977154	1.0991	1.07361	1.09578	1.0895	0.896886	0.342149
G3V4X5	Proteasome endopeptidase complex OS=Homo sapiens GN=PSMA3 PE=1 SV=1 - [G3V4X5_HUMAN]	8.89	2	2	2	180	20.275	5.09717	1.03916	1.17131	0.945555	1.05201	0.773779	1.01452	0.935513	0.907937	1.15868	0.209651
Q68DY8	Uncharacterized protein DKFZp686I11137 OS=Homo sapiens GN=DKFZp686I11137 PE=2 SV=1 - [Q68DY8_HUMAN]	2.55	1	1	1	667	73.2843	5.2876	0.843602	0.846509	1.02808	0.906064	1.18577	1.00216	1.09585	1.09459	0.827763	0.0800208
D3DSC5	Neural cell adhesion molecule 2, isoform CRA_a (Fragment) OS=Homo sapiens GN=NCAM2 PE=4 SV=1 - [D3DSC5_HUMAN]	1.22	1	1	1	818	90.9951	5.60498	0.974676	0.920661	1.07411	0.989816	0.846516	1.11029	0.91401	0.956938	1.03436	0.736108
A0A1B0GVK0	Fibroleukin OS=Homo sapiens GN=FGL2 PE=1 SV=1 - [A0A1B0GVK0_HUMAN]	4	1	1	1	225	25.3467	5.52881	1.01461	1.1032	0.778929	0.965578	0.911515	1.03474	0.909646	0.951967	1.0143	0.903342
A0A068LN03	Ig heavy chain variable region (Fragment) OS=Homo sapiens PE=2 SV=1 - [A0A068LN03_HUMAN]	15	1	2	8	120	13.3755	8.42627	1.07026	2.11179	0.467976	1.21667	1.04003	0.990218	2.00388	1.34471	0.904786	0.836801
A0A024R599	Solute carrier family 3 (Activators of dibasic and neutral amino acid transport), member 2, isoform CRA_e OS=Homo sapiens GN=SLC3A2 PE=4 SV=1 - [A0A024R599_HUMAN]	6.53	3	3	3	398	43.4916	5.49072	1.01935	0.929214	0.959266	0.969276	1.10876	0.937246	0.949922	0.998643	0.970593	0.656451
Q14126	Desmoglein-2 OS=Homo sapiens GN=DSG2 PE=1 SV=2 - [DSG2_HUMAN]	6.26	7	7	9	1118	122.218	5.23682	0.948134	1.12213	0.931098	1.00045	1.05177	0.923157	1.06018	1.0117	0.988881	0.888685
B4DPP0	cDNA FLJ51032, highly similar to CD9 antigen OS=Homo sapiens PE=2 SV=1 - [B4DPP0_HUMAN]	4.96	1	1	2	141	15.8952	6.7417	1.0193	0.822486	1.36711	1.06963	0.575575	1.02193	0.692623	0.763375	1.40119	0.214645
D6RGW0	Endoplasmic reticulum aminopeptidase 2 (Fragment) OS=Homo sapiens GN=ERAP2 PE=1 SV=1 - [D6RGW0_HUMAN]	1.15	1	1	1	694	79.6811	6.27783	0.914127	0.888244	0.825129	0.875833	1.54373	1.00829	1.11077	1.22093	0.71735	0.106463
P07942	Laminin subunit beta-1 OS=Homo sapiens GN=LAMB1 PE=1 SV=2 - [LAMB1_HUMAN]	2.24	3	3	4	1786	197.909	4.94482	0.927392	0.953749	1.09557	0.992238	0.642421	0.969489	0.873293	0.828401	1.19778	0.211314
P49913	Cathelicidin antimicrobial peptide OS=Homo sapiens GN=CAMP PE=1 SV=1 - [CAMP_HUMAN]	14.71	3	3	3	170	19.2892	9.40771	1.2406	1.1448	1.04322	1.14287	1.08392	0.917061	0.971074	0.990684	1.15362	0.113207
Q99650	Oncostatin-M-specific receptor subunit beta OS=Homo sapiens GN=OSMR PE=1 SV=1 - [OSMR_HUMAN]	1.02	1	1	1	979	110.438	5.8208	0.878648	1.00821	1.0548	0.980554	1.0833	0.986581	0.806985	0.958957	1.02252	0.834037
A0A1W2PRU0	Alpha-endosulfine OS=Homo sapiens GN=ENSA PE=1 SV=1 - [A0A1W2PRU0_HUMAN]	11.76	1	1	1	119	13.1246	6.17627	0.921979	1.15622	1.41019	1.1628	0.596609	0.897044	0.943451	0.812368	1.43136	0.120378
Q86TY5	Galectin OS=Homo sapiens PE=2 SV=1 - [Q86TY5_HUMAN]	5.79	1	1	1	121	13.8882	9.15869	0.387662	0.474111	1.83654	0.899439	0.819581	0.361147	0.339272	0.506667	1.77521	0.471623
A2VDJ4	GNPTG protein (Fragment) OS=Homo sapiens GN=GNPTG PE=2 SV=1 - [A2VDJ4_HUMAN]	3.42	1	1	1	292	32.9384	6.78564	1.05882	1.00617	0.839931	0.968305	1.26204	1.01069	0.927577	1.06677	0.9077	0.458859
A0A087WSY6	Immunoglobulin kappa variable 3D-15 OS=Homo sapiens GN=IGKV3D-15 PE=3 SV=6 - [KVD15_HUMAN]	13.91	1	2	5	115	12.5263	5.18604	1.04579	1.87845	0.522596	1.14894	1.25996	0.994402	1.42661	1.22699	0.936393	0.859771
P20618	Proteasome subunit beta type-1 OS=Homo sapiens GN=PSMB1 PE=1 SV=2 - [PSB1_HUMAN]	7.47	2	2	2	241	26.4724	8.1333	0.941267	1.3	1.14181	1.12769	0.70673	0.913347	0.865781	0.82862	1.36093	0.0690471
Q96N83	Podocalyxin OS=Homo sapiens PE=2 SV=1 - [Q96N83_HUMAN]	2.51	1	1	1	518	54.543	5.57959	1.00216	1.00648	0.981548	0.996728	0.977134	0.908292	0.996938	0.960788	1.03741	0.267778
A0A087WYC1	Heat shock 70 kDa protein 4 OS=Homo sapiens GN=HSPA4 PE=1 SV=1 - [A0A087WYC1_HUMAN]	2.72	2	2	2	699	78.5562	5.17334	1.06579	1.00782	1.09415	1.05592	0.748754	0.984553	0.92206	0.885122	1.19297	0.0849411
H0YA83	Beta-hexosaminidase subunit beta (Fragment) OS=Homo sapiens GN=HEXB PE=1 SV=1 - [H0YA83_HUMAN]	5.88	1	1	1	170	19.5099	5.70654	0.826139	0.984352	1.11913	0.976542	1.17241	1.01848	0.995013	1.06197	0.919559	0.446589
H0YI43	Myosin light polypeptide 6 (Fragment) OS=Homo sapiens GN=MYL6 PE=1 SV=1 - [H0YI43_HUMAN]	15.66	1	1	1	83	9.24322	4.77979	0.995859	0.731563	1.24211	0.989843	0.477422	1.1546	1.3179	0.983308	1.00665	0.983474
Q9UL89	Myosin-reactive immunoglobulin heavy chain variable region (Fragment) OS=Homo sapiens PE=2 SV=1 - [Q9UL89_HUMAN]	16.38	1	2	3	116	12.5973	9.1001	1.01019	1.67187	0.650244	1.11077	1.01446	1.28833	1.64118	1.31466	0.844911	0.59133
Q06323	Proteasome activator complex subunit 1 OS=Homo sapiens GN=PSME1 PE=1 SV=1 - [PSME1_HUMAN]	3.21	1	1	1	249	28.705	6.02393	1.05768	0.962626	1.1007	1.04034	0.783399	0.947952	0.95989	0.89708	1.15969	0.110299
Q8TE63	Immunglobulin light chain variable region (Fragment) OS=Homo sapiens PE=2 SV=1 - [Q8TE63_HUMAN]	22.73	1	3	11	110	11.4717	8.90967	0.877574	2.66271	0.518113	1.3528	1.03392	0.87078	1.64639	1.1837	1.14286	0.821956
P01137	Transforming growth factor beta-1 OS=Homo sapiens GN=TGFB1 PE=1 SV=2 - [TGFB1_HUMAN]	4.1	2	2	2	390	44.3128	8.52881	1.05515	1.09753	1.05914	1.07061	0.692158	0.947851	1.02007	0.886693	1.20741	0.140902
B4DSX2	cDNA FLJ60144, highly similar to Complement component C1q receptor OS=Homo sapiens PE=2 SV=1 - [B4DSX2_HUMAN]	3.17	1	1	1	347	36.5906	6.29053	0.847252	0.929524	0.966813	0.91453	1.05122	1.00555	1.0017	1.01949	0.897044	0.0535484
Q53R53	Uncharacterized protein MERTK (Fragment) OS=Homo sapiens GN=MERTK PE=4 SV=1 - [Q53R53_HUMAN]	1.94	1	1	1	567	63.006	5.33838	0.947016	1.01284	0.924682	0.961513	1.22239	1.00537	0.913084	1.04695	0.918395	0.421201
Q8WWZ8	Oncoprotein-induced transcript 3 protein OS=Homo sapiens GN=OIT3 PE=1 SV=2 - [OIT3_HUMAN]	1.28	1	1	1	545	59.9825	5.57959	0.619	1.49831	0.567068	0.894794	1.02482	0.842824	0.956927	0.941524	0.950367	0.886298
A2NYU7	Heavy chain Fab (Fragment) OS=Homo sapiens PE=2 SV=1 - [A2NYU7_HUMAN]	7.09	1	1	3	127	13.9831	9.24658	0.818519	2.39549	0.507442	1.24048	1.10572	1.23213	1.87174	1.40319	0.884044	0.809153
K7EP07	Tubulin-folding cofactor B (Fragment) OS=Homo sapiens GN=TBCB PE=1 SV=8 - [K7EP07_HUMAN]	6.51	1	1	1	169	19.2394	5.33838	1.05633	0.945762	1.0304	1.01083	0.673721	1.04379	0.989622	0.902377	1.12019	0.417663
E9PLD0	Ras-related protein Rab-1B OS=Homo sapiens GN=RAB1B PE=1 SV=1 - [E9PLD0_HUMAN]	13.02	2	3	4	169	18.4714	5.71924	1.08827	1.03623	1.09964	1.07471	0.57281	1.02866	0.956956	0.85281	1.2602	0.195315
E5RGQ7	Dematin (Fragment) OS=Homo sapiens GN=DMTN PE=1 SV=1 - [E5RGQ7_HUMAN]	8.11	1	1	1	148	16.7557	8.88037	1.11689	1.0765	1.00842	1.06727	0.835865	1.01325	1.02014	0.956419	1.1159	0.178959
Q9HB00	Desmocollin 1, isoform CRA_b OS=Homo sapiens GN=DSC1 PE=4 SV=1 - [Q9HB00_HUMAN]	4.88	4	4	4	840	93.776	5.52881	0.899508	1.04957	1.0286	0.99256	1.01496	1.02258	1.07088	1.03614	0.957943	0.433311
Q9BZ93	Prosomal P27K protein (Fragment) OS=Homo sapiens GN=PSMA6 PE=4 SV=1 - [Q9BZ93_HUMAN]	22.41	1	1	1	58	6.19626	8.96826	1.06903	0.876668	1.12834	1.02468	0.949419	0.928526	0.90731	0.928418	1.10368	0.279006
A0A0U1RQQ4	Endothelial protein C receptor (Fragment) OS=Homo sapiens GN=PROCR PE=1 SV=1 - [A0A0U1RQQ4_HUMAN]	10.33	2	2	4	213	24.3793	6.94678	1.03668	0.88205	0.864894	0.927876	1.08507	0.994878	0.882037	0.987328	0.939784	0.499723
Q8WZ75	Roundabout homolog 4 OS=Homo sapiens GN=ROBO4 PE=1 SV=1 - [ROBO4_HUMAN]	7.85	5	5	6	1007	107.39	6.63916	0.887445	1.0376	1.03943	0.988161	1.1554	1.08479	1.03248	1.09089	0.905832	0.171159
P80511	Protein S100-A12 OS=Homo sapiens GN=S100A12 PE=1 SV=2 - [S10AC_HUMAN]	16.3	2	2	2	92	10.5685	6.25244	0.941442	1.24022	0.940858	1.04084	0.668227	1.24122	1.37809	1.09585	0.949804	0.829398
Q5NV82	V4-2 protein (Fragment) OS=Homo sapiens GN=V4-2 PE=4 SV=1 - [Q5NV82_HUMAN]	8.65	1	1	1	104	11.1354	7.97217	1.11718	1.98786	0.414916	1.17332	1.92146	0.941336	1.42485	1.42921	0.820954	0.657835
E9PQ40	Fibroblast growth factor receptor 1 (Fragment) OS=Homo sapiens GN=FGFR1 PE=1 SV=1 - [E9PQ40_HUMAN]	9.41	1	1	2	85	9.53357	4.62744	0.922137	0.9223	0.990655	0.945031	1.18317	1.0623	0.997979	1.08115	0.874099	0.0818814
Q7Z7M0	Multiple epidermal growth factor-like domains protein 8 OS=Homo sapiens GN=MEGF8 PE=1 SV=2 - [MEGF8_HUMAN]	1.62	5	5	6	2845	302.902	6.87354	0.955974	0.978097	0.981925	0.971999	1.01256	0.926804	0.964079	0.967815	1.00432	0.880456
F8VX93	Dynactin subunit 2 (Fragment) OS=Homo sapiens GN=DCTN2 PE=1 SV=1 - [F8VX93_HUMAN]	5.93	1	1	1	135	15.106	6.34131	1.21134	1.00517	1.13819	1.11823	0.590585	1.00946	1.0262	0.875415	1.27738	0.1917
B7Z462	cDNA FLJ58016, highly similar to Polypeptide N-acetylgalactosaminyltransferase2 (EC 2.4.1.41) OS=Homo sapiens PE=2 SV=1 - [B7Z462_HUMAN]	5.28	2	2	2	360	40.7514	8.26514	0.975324	1.03036	0.887136	0.964274	1.05381	1.14336	0.9778	1.05832	0.911136	0.212568
A0A0F7SZ86	IGHV2-70 protein (Fragment) OS=Homo sapiens GN=IGHV2-70 PE=4 SV=1 - [A0A0F7SZ86_HUMAN]	23.33	1	2	5	90	10.156	7.95752	1.19474	3.23875	0.400634	1.61138	0.45272	1.34263	1.48944	1.09493	1.47167	0.598871
R4GN98	Protein S100 (Fragment) OS=Homo sapiens GN=S100A6 PE=1 SV=1 - [R4GN98_HUMAN]	25.88	3	3	7	85	9.67506	5.45264	1.14756	0.969257	1.1247	1.0805	0.596263	1.02849	0.954752	0.859834	1.25664	0.202115
F8WAM2	T-complex protein 1 subunit eta (Fragment) OS=Homo sapiens GN=CCT7 PE=1 SV=1 - [F8WAM2_HUMAN]	19.39	2	2	2	98	10.4878	7.41553	1.00717	0.937037	0.980037	0.974748	0.901947	1.121	1.00685	1.00993	0.965164	0.624598
B5A952	Soluble TIE1 variant 5 OS=Homo sapiens GN=TIE PE=2 SV=1 - [B5A952_HUMAN]	1.2	1	1	1	751	81.1576	7.40088	0.996502	1.33961	0.8716	1.06924	1.09863	1.02249	1.09398	1.0717	0.997706	0.987022
P30530	Tyrosine-protein kinase receptor UFO OS=Homo sapiens GN=AXL PE=1 SV=3 - [UFO_HUMAN]	0.78	1	1	2	894	98.273	5.42725	1.03537	0.942703	1.03535	1.00447	1.00974	0.928429	0.926554	0.954908	1.05191	0.296327
F2Z2Q9	Low molecular weight phosphotyrosine protein phosphatase OS=Homo sapiens GN=ACP1 PE=1 SV=1 - [F2Z2Q9_HUMAN]	12.86	1	1	2	70	7.4958	5.10986	1.00129	0.886667	1.17294	1.0203	0.81822	1.05996	1.00261	0.960264	1.06252	0.616165
D6RDU5	Septin-11 (Fragment) OS=Homo sapiens GN=SEPT11 PE=1 SV=1 - [D6RDU5_HUMAN]	17.74	5	6	7	372	43.0859	6.30322	1.12266	0.891292	1.1773	1.06375	0.687702	0.933665	0.979251	0.866873	1.22711	0.193277
B4DV98	cDNA FLJ53522, highly similar to Homo sapiens mucin and cadherin-like (MUCDHL), transcript variant 3, mRNA OS=Homo sapiens PE=2 SV=1 - [B4DV98_HUMAN]	1.55	1	1	1	644	68.8288	4.84326	0.879663	1.15845	1.13542	1.05785	0.952633	1.00989	0.98983	0.984116	1.07492	0.462802
H6UYS7	Alpha-synuclein OS=Homo sapiens GN=SNCA PE=1 SV=1 - [H6UYS7_HUMAN]	16.33	1	1	3	98	10.0142	6.7417	0.902839	1.11314	1.01391	1.00996	0.934634	0.949743	1.06695	0.983776	1.02662	0.740455
B3KXM9	cDNA FLJ45746 fis, clone KIDNE2018727, highly similar to Uromodulin OS=Homo sapiens PE=2 SV=1 - [B3KXM9_HUMAN]	4.44	2	2	2	428	47.3398	6.7417	1.04243	0.998892	0.893807	0.978377	1.02377	0.976173	0.9892	0.99638	0.981932	0.717458
J3QRA3	Na(+)/H(+) exchange regulatory cofactor NHE-RF1 (Fragment) OS=Homo sapiens GN=SLC9A3R1 PE=1 SV=1 - [J3QRA3_HUMAN]	20	1	1	1	35	4.05595	4.88135	1.11336	0.90573	1.26099	1.09336	0.424115	0.954865	0.932481	0.770487	1.41905	0.184556
M0R0Y2	Alpha-soluble NSF attachment protein OS=Homo sapiens GN=NAPA PE=1 SV=1 - [M0R0Y2_HUMAN]	8.98	2	2	2	256	29.1443	5.16064	1.02843	0.907889	1.13025	1.02219	0.578307	1.17939	0.9202	0.892634	1.14514	0.523499
P03973	Antileukoproteinase OS=Homo sapiens GN=SLPI PE=1 SV=2 - [SLPI_HUMAN]	5.3	1	1	1	132	14.3159	8.74854	0.962545	0.916003	1.00204	0.960195	1.04414	0.969301	1.17027	1.06124	0.90479	0.187846
B4E143	cDNA FLJ58084, highly similar to Receptor-type tyrosine-protein phosphatase mu (EC 3.1.3.48) OS=Homo sapiens PE=2 SV=1 - [B4E143_HUMAN]	2.95	3	3	3	847	94.051	7.31299	0.935509	0.958829	1.02187	0.972071	1.14324	0.963103	0.972216	1.02618	0.947267	0.445504
P11766	Alcohol dehydrogenase class-3 OS=Homo sapiens GN=ADH5 PE=1 SV=4 - [ADHX_HUMAN]	4.28	2	2	2	374	39.6984	7.48877	1.19062	0.901535	1.19437	1.09551	0.534058	1.07339	0.970803	0.859418	1.27471	0.28557
G5E968	Chromogranin A (Parathyroid secretory protein 1), isoform CRA_b OS=Homo sapiens GN=CHGA PE=1 SV=1 - [G5E968_HUMAN]	22.22	4	4	4	306	34.2481	4.94482	0.976697	0.806892	1.02954	0.937709	0.912799	0.983506	0.91917	0.938492	0.999166	0.991715
A0A024QZV0	HCG1811539, isoform CRA_b OS=Homo sapiens GN=hCG_1811539 PE=3 SV=1 - [A0A024QZV0_HUMAN]	9.57	2	3	5	324	36.155	5.46533	1.03181	1.10367	1.08403	1.07317	0.842068	1.13455	0.867053	0.94789	1.13217	0.262036
Q9H3K6	BolA-like protein 2 OS=Homo sapiens GN=BOLA2 PE=1 SV=1 - [BOLA2_HUMAN]	18.6	1	1	1	86	10.1102	6.52197	0.965792	1.23761	1.12372	1.10904	0.851643	0.974647	0.935744	0.920678	1.20459	0.0957161
A7MBN2	TNC protein OS=Homo sapiens GN=TNC PE=2 SV=1 - [A7MBN2_HUMAN]	4.26	7	7	8	1927	210.355	4.98291	0.949612	1.00708	1.0086	0.98843	1.049	1.00425	1.0982	1.05048	0.94093	0.136398
A0A1B0GTV0	Methyl-CpG-binding protein 2 (Fragment) OS=Homo sapiens GN=MECP2 PE=1 SV=1 - [A0A1B0GTV0_HUMAN]	15.09	1	1	1	53	6.07449	9.90576	1.04149	0.895806	1.12303	1.02011	1.20383	0.922519	1.02894	1.05177	0.969901	0.779183
P50453	Serpin B9 OS=Homo sapiens GN=SERPINB9 PE=1 SV=1 - [SPB9_HUMAN]	7.98	3	3	3	376	42.3763	5.85889	1.01793	0.962566	1.05315	1.01122	0.918184	1.15125	1.07364	1.04769	0.965188	0.645404
O43234	Rheumatoid factor RF-ET13 (Fragment) OS=Homo sapiens PE=2 SV=1 - [O43234_HUMAN]	7.22	1	1	1	97	10.7414	9.20264	1.26938	2.99871	0.473401	1.5805	0.934935	0.900541	1.16727	1.00091	1.57905	0.482833
Q9Y608	Leucine-rich repeat flightless-interacting protein 2 OS=Homo sapiens GN=LRRFIP2 PE=1 SV=1 - [LRRF2_HUMAN]	3.19	2	2	2	721	82.1213	6.94678	0.8494	1.06792	1.15201	1.02311	0.571464	1.03782	0.971271	0.860186	1.18941	0.395395
A6NHN0	Otolin-1 OS=Homo sapiens GN=OTOL1 PE=3 SV=1 - [OTOL1_HUMAN]	1.68	1	1	1	477	49.3906	8.33838	1.1367	2.22151	0.275533	1.21125	1.88441	0.987193	1.75746	1.54302	0.784983	0.625728
Q7L576	Cytoplasmic FMR1-interacting protein 1 OS=Homo sapiens GN=CYFIP1 PE=1 SV=1 - [CYFP1_HUMAN]	1.84	2	2	2	1253	145.089	6.90283	1.13428	0.954758	0.972184	1.02041	0.718684	1.0806	0.898835	0.899374	1.13457	0.366955
K7EIW7	Platelet glycoprotein VI (Fragment) OS=Homo sapiens GN=GP6 PE=1 SV=1 - [K7EIW7_HUMAN]	12.82	2	2	2	117	12.9923	8.89502	1.14676	0.925939	1.27844	1.11705	0.611613	0.991814	0.808194	0.803874	1.38958	0.105784
V9HW76	Epididymis secretory protein Li 300 OS=Homo sapiens GN=HEL-S-300 PE=2 SV=1 - [V9HW76_HUMAN]	6.73	2	2	3	223	25.4147	7.45947	1.01724	0.829686	0.960288	0.935739	1.10729	1.08014	1.01352	1.06699	0.876993	0.102147
B4DUJ3	cDNA FLJ52895, highly similar to Carbonic anhydrase 3 (EC 4.2.1.1) OS=Homo sapiens PE=2 SV=1 - [B4DUJ3_HUMAN]	7.66	2	2	2	235	26.7905	8.30908	1.00176	1.02275	0.97974	1.00142	1.06139	0.976593	1.31465	1.11754	0.896087	0.31973
B4DF17	cDNA FLJ59187, highly similar to Multiple coagulation factor deficiency protein 2 homolog OS=Homo sapiens PE=2 SV=1 - [B4DF17_HUMAN]	13.39	1	1	1	127	14.3948	4.91943	1.12533	1.0569	1.20331	1.12851	0.538851	1.03843	0.97314	0.850141	1.32744	0.161635
Q53G89	Elongation factor 1-alpha (Fragment) OS=Homo sapiens PE=2 SV=1 - [Q53G89_HUMAN]	5.77	3	3	3	433	46.8644	9.11475	0.982449	0.933206	1.13388	1.01651	0.830473	0.955982	1.03004	0.938831	1.08274	0.406884
Q7Z759	CCT8 protein OS=Homo sapiens GN=CCT8 PE=2 SV=1 - [Q7Z759_HUMAN]	4.43	2	2	2	497	54.0717	5.31299	1.00344	0.769432	1.2918	1.02156	0.535003	1.1195	0.993556	0.882686	1.15733	0.583504
A8K9D8	cDNA FLJ78129, highly similar to Homo sapiens reversion-inducing-cysteine-rich protein with kazal motifs (RECK), mRNA OS=Homo sapiens PE=2 SV=1 - [A8K9D8_HUMAN]	0.72	1	1	1	971	106.387	6.68311	0.935652	0.761027	1.06323	0.919968	1.0501	0.918832	0.997692	0.988873	0.930319	0.510661
B4DJQ7	cDNA FLJ60602, moderately similar to D-dopachrome decarboxylase (EC 4.1.1.84) OS=Homo sapiens PE=2 SV=1 - [B4DJQ7_HUMAN]	13.39	2	2	3	112	11.6678	5.78271	1.05759	1.01181	1.03879	1.03606	0.821107	1.02321	0.979335	0.941217	1.10077	0.20547
B4DHM1	cDNA FLJ54508, highly similar to tRNA(5-methylaminomethyl-2-thiouridylate)-methyltransferase (EC 2.1.1.61) OS=Homo sapiens PE=2 SV=1 - [B4DHM1_HUMAN]	1.83	1	1	1	328	37.099	7.97217	1.09066	1.0008	1.08432	1.05859	1.36359	0.719798	0.847562	0.976983	1.08353	0.702615
C9IY94	Septin-2 (Fragment) OS=Homo sapiens GN=SEPT2 PE=1 SV=1 - [C9IY94_HUMAN]	9.92	1	1	1	121	13.728	5.80811	0.982519	1.00485	1.44347	1.14361	0.516	1.04672	0.821811	0.794842	1.4388	0.179889
A8K990	cDNA FLJ78482 OS=Homo sapiens PE=2 SV=1 - [A8K990_HUMAN]	1.16	1	1	1	774	84.0867	4.33545	0.939283	1.94185	0.907433	1.26285	0.811884	0.818604	0.783498	0.804662	1.56942	0.248805
E9PN95	Uteroglobin OS=Homo sapiens GN=SCGB1A1 PE=1 SV=1 - [E9PN95_HUMAN]	12.5	1	1	1	56	6.28112	4.95752	0.788156	1.09863	0.667272	0.851352	1.59756	1.14111	1.2233	1.32066	0.644643	0.0692902
Q86U17	Serpin A11 OS=Homo sapiens GN=SERPINA11 PE=2 SV=2 - [SPA11_HUMAN]	3.79	2	2	2	422	46.9595	7.6792	0.954726	1.12625	0.944309	1.00843	0.980659	0.884556	1.02718	0.964133	1.04594	0.573771
Q96SC2	Glutamate receptor 7 (Fragment) OS=Homo sapiens GN=GRIK3 PE=4 SV=1 - [Q96SC2_HUMAN]	15.66	1	1	1	83	9.33001	8.14795	1.34474	1.21607	0.665491	1.07543	1.5591	1.20008	1.42219	1.39379	0.771588	0.24377
X6RFL8	Ras-related protein Rab-14 (Fragment) OS=Homo sapiens GN=RAB14 PE=1 SV=1 - [X6RFL8_HUMAN]	13.26	2	2	2	181	20.3963	6.32861	1.04295	0.93707	1.20385	1.06129	0.655957	1.03849	0.854967	0.849806	1.24886	0.192196
B7Z795	Carboxylic ester hydrolase OS=Homo sapiens PE=2 SV=1 - [B7Z795_HUMAN]	8.1	3	3	3	432	47.6793	5.94775	0.929616	1.20474	1.13185	1.08874	1.06754	1.09712	0.828525	0.997728	1.09122	0.484744
Q86WA0	Hypoxia-inducible HIG-1 (Fragment) OS=Homo sapiens GN=HIG-1 PE=2 SV=1 - [Q86WA0_HUMAN]	1.66	1	1	1	722	81.6964	7.51807	0.992529	0.508822	0.78753	0.76296	1.10647	1.17754	1.16869	1.1509	0.662924	0.0522803
A0A125U0V1	MS-F1 heavy chain variable region (Fragment) OS=Homo sapiens PE=2 SV=1 - [A0A125U0V1_HUMAN]	7.94	1	1	1	126	13.5004	8.1626	0.936289	2.31172	0.499858	1.24929	1.15134	0.934284	1.81951	1.30171	0.959727	0.935375
Q5NV62	V3-4 protein (Fragment) OS=Homo sapiens GN=V3-4 PE=4 SV=1 - [Q5NV62_HUMAN]	9.09	1	1	2	99	10.3689	4.729	1.31015	1.8763	0.648227	1.27823	0.952765	1.10178	1.46398	1.17284	1.08985	0.798342
J3KQ45	Trans-Golgi network integral membrane protein 2 OS=Homo sapiens GN=TGOLN2 PE=1 SV=1 - [J3KQ45_HUMAN]	9.03	4	4	4	454	47.8517	5.84619	1.01184	1.1886	0.91775	1.0394	1.08192	0.960315	1.11158	1.05127	0.988705	0.903428
B0BCY7	Aminopeptidase OS=Homo sapiens GN=ENPEP PE=2 SV=1 - [B0BCY7_HUMAN]	0.84	1	1	1	957	109.162	5.46533	1.07361	0.883593	1.14706	1.03476	0.82117	0.954049	0.839308	0.871509	1.18731	0.140002
P14550	Alcohol dehydrogenase [NADP(+)] OS=Homo sapiens GN=AKR1A1 PE=1 SV=3 - [AK1A1_HUMAN]	2.46	1	1	1	325	36.5499	6.78564	1.07264	0.966943	1.16764	1.06907	0.684909	0.994675	0.999488	0.893024	1.19714	0.213502
C9JM82	Septin-5 (Fragment) OS=Homo sapiens GN=SEPT5 PE=1 SV=1 - [C9JM82_HUMAN]	3.99	1	1	1	301	34.6506	6.20166	1.15306	1	1.08598	1.07968	0.797176	0.954465	0.985163	0.912268	1.18351	0.0840123
A2NU33	Lambda L-chain C region (Fragment) OS=Homo sapiens PE=4 SV=1 - [A2NU33_HUMAN]	21.7	1	2	2	106	11.5896	7.07861	0.948859	2.29025	0.639738	1.29295	1.09177	1.12755	1.40709	1.2088	1.06961	0.878435
B4DDT1	cDNA FLJ50111, highly similar to Hepatic triacylglycerol lipase (EC 3.1.1.3) OS=Homo sapiens PE=2 SV=1 - [B4DDT1_HUMAN]	1.6	1	1	1	438	48.9341	9.12939	1.10691	0.9407	0.740396	0.929336	1.53734	1.01785	1.07207	1.20909	0.768627	0.226634
D6RC06	Histidine triad nucleotide-binding protein 1 OS=Homo sapiens GN=HINT1 PE=1 SV=1 - [D6RC06_HUMAN]	10.77	1	1	1	65	7.31895	9.40771	1.17461	0.978682	1.03108	1.06146	0.54908	1.23336	1.04334	0.941925	1.1269	0.603281
Q00610	Clathrin heavy chain 1 OS=Homo sapiens GN=CLTC PE=1 SV=5 - [CLH1_HUMAN]	2.39	3	4	5	1675	191.493	5.69385	1.06519	0.906109	1.18253	1.05128	0.745662	1.02118	1.26116	1.00934	1.04155	0.816327
Q5R341	Selectin P (Granule membrane protein 140kDa, antigen CD62), isoform CRA_a OS=Homo sapiens GN=SELP PE=1 SV=1 - [Q5R341_HUMAN]	2.21	2	2	2	768	83.9802	6.7124	1.09722	1.18923	0.906154	1.0642	0.703389	0.983685	1.20642	0.964499	1.10337	0.58419
A0A1E1ERW3	Diaphanous homolog 1 OS=Homo sapiens GN=DIAPH1 PE=2 SV=1 - [A0A1E1ERW3_HUMAN]	0.67	1	1	1	1203	133.796	5.2749	0.945149	1.00695	1.30194	1.08468	0.343884	1.15281	0.811427	0.769375	1.40982	0.290392
B7Z5C1	cDNA FLJ56126, highly similar to Programmed cell death 6-interacting protein OS=Homo sapiens PE=2 SV=1 - [B7Z5C1_HUMAN]	2	1	1	1	649	71.7747	6.41748	0.882026	0.844984	1.13816	0.955058	0.69963	1.05764	0.902734	0.886667	1.07713	0.647826
Q5J1K4	Mono-ADP-ribosyltransferase 3 variant Id (Fragment) OS=Homo sapiens PE=2 SV=1 - [Q5J1K4_HUMAN]	25	2	2	2	84	9.55669	5.40186	1.08079	0.98701	0.93316	1.00032	1.03339	1.11517	1.00726	1.05194	0.950931	0.393338
Q59H30	Activating transcription factor 6 variant (Fragment) OS=Homo sapiens PE=2 SV=1 - [Q59H30_HUMAN]	2.08	1	1	1	578	64.1779	8.48486	0.654241	1.19841	1.23535	1.02933	0.582326	1.32693	0.66303	0.85743	1.20049	0.599138
K7EJ25	N-acetylglucosamine-1-phosphodiester alpha-N-acetylglucosaminidase (Fragment) OS=Homo sapiens GN=NAGPA PE=1 SV=1 - [K7EJ25_HUMAN]	7.69	1	1	1	104	11.1156	8.88037	1.01401	0.980093	1.09346	1.02919	0.910081	1.02841	0.879989	0.939495	1.09547	0.186953
A0A0C4DH35	Immunoglobulin heavy variable 3-35 (non-functional) (Fragment) OS=Homo sapiens GN=IGHV3-35 PE=1 SV=1 - [A0A0C4DH35_HUMAN]	9.4	1	1	2	117	12.8023	7.88428	0.982736	2.22351	0.493855	1.23337	0.957758	1.2003	1.74804	1.30203	0.947261	0.909186
Q99445	Glycosyl-phosphatidylinositol-anchored molecule-like protein OS=Homo sapiens GN=GML PE=2 SV=1 - [GML_HUMAN]	3.8	1	1	1	158	17.7178	6.48096	1.03858	1.07923	0.826344	0.981385	1.28221	0.85239	1.19075	1.10845	0.885367	0.451399
Q15149	Plectin OS=Homo sapiens GN=PLEC PE=1 SV=3 - [PLEC_HUMAN]	0.19	1	1	1	4684	531.466	5.96045	0.835355	1.06837	1.32436	1.07603	0.751967	1.21081	0.960459	0.974413	1.10428	0.627657
Q9H7K8	FLJ00064 protein (Fragment) OS=Homo sapiens GN=FLJ00064 PE=2 SV=1 - [Q9H7K8_HUMAN]	4.35	1	1	1	276	30.3631	5.65576	1.01752	1.3389	1.12424	1.16022	0.715742	0.974053	0.811124	0.83364	1.39175	0.0540307
Q5IWS5	Intelectin 1 OS=Homo sapiens GN=ITLN1 PE=2 SV=1 - [Q5IWS5_HUMAN]	2.56	1	1	1	313	34.9553	5.8208	1.26032	0.93733	0.820843	1.00617	0.86458	0.723651	0.773783	0.787338	1.27793	0.187406
A8MXK9	Uncharacterized protein ENSP00000382033 OS=Homo sapiens PE=2 SV=2 - [YQ018_HUMAN]	9.64	1	1	5	166	17.9959	6.52197	0.937597	1.33469	0.933663	1.06865	1.03545	1.05341	1.11237	1.06708	1.00147	0.991256
P01854	Immunoglobulin heavy constant epsilon OS=Homo sapiens GN=IGHE PE=1 SV=1 - [IGHE_HUMAN]	1.87	1	1	1	428	46.9893	8.06006	0.723518	1.54806	0.613335	0.961639	0.766647	0.623093	3.50509	1.63161	0.58938	0.532914
C9JRZ8	Aldo-keto reductase family 1 member B15 OS=Homo sapiens GN=AKR1B15 PE=1 SV=2 - [AK1BF_HUMAN]	2.53	1	1	1	316	36.5138	6.69775	1.089	1.02313	0.947782	1.01997	0.742067	1.09408	1.15563	0.997257	1.02277	0.874679
Q5JSH3	WD repeat-containing protein 44 OS=Homo sapiens GN=WDR44 PE=1 SV=1 - [WDR44_HUMAN]	1.97	2	2	2	913	101.304	5.45264	1.03823	1.17761	1.07797	1.09794	0.537081	0.948754	1.00219	0.82934	1.32387	0.15335
B2RAH7	cDNA, FLJ94921, highly similar to Homo sapiens prolyl endopeptidase (PREP), mRNA OS=Homo sapiens PE=2 SV=1 - [B2RAH7_HUMAN]	1.13	1	1	1	710	80.682	5.85889	1.05434	0.999364	1.11347	1.05572	0.51658	1.0308	0.779973	0.775786	1.36085	0.139461
A0A140T998	Proteasome subunit beta type-8 OS=Homo sapiens GN=PSMB8 PE=1 SV=1 - [A0A140T998_HUMAN]	3.17	1	1	1	252	27.8323	7.79639	1.02196	0.977003	1.03448	1.01115	0.848463	1.01221	1.21353	1.02474	0.986738	0.905068
B4DZM1	cDNA FLJ58310, highly similar to Homo sapiens trinucleotide repeat containing 15 (TNRC15), mRNA OS=Homo sapiens PE=2 SV=1 - [B4DZM1_HUMAN]	1.72	1	1	5	872	100.549	5.021	1.01736	1.03503	1.00866	1.02035	1.09728	0.988187	0.917052	1.00084	1.0195	0.73133
P22692	Insulin-like growth factor-binding protein 4 OS=Homo sapiens GN=IGFBP4 PE=1 SV=2 - [IBP4_HUMAN]	18.22	4	4	8	258	27.9155	7.15186	1.0192	0.963979	0.957919	0.980368	1.01254	0.984011	0.966593	0.987715	0.992561	0.771603
Q99592	Zinc finger and BTB domain-containing protein 18 OS=Homo sapiens GN=ZBTB18 PE=1 SV=1 - [ZBT18_HUMAN]	2.3	1	1	2	522	58.3173	5.69385	0.916985	1.18769	1.02499	1.04322	1.3854	0.754645	0.852072	0.997371	1.04597	0.838789
Q9NY41	Cartilage glycoprotein-39 (Fragment) OS=Homo sapiens GN=CHI3L1 PE=4 SV=1 - [Q9NY41_HUMAN]	17.39	1	1	1	46	5.08455	4.729	0.92825	1.21034	0.75698	0.96519	1.15576	1.04888	1.20704	1.13723	0.848723	0.286903
G3V5F2	Peptidyl-prolyl cis-trans isomerase FKBP3 OS=Homo sapiens GN=FKBP3 PE=1 SV=1 - [G3V5F2_HUMAN]	12.31	1	1	1	65	7.22069	8.57275	0.981456	0.85189	1.18285	1.0054	0.720621	1.06023	0.827709	0.869519	1.15627	0.383625
H0YC77	Annexin (Fragment) OS=Homo sapiens GN=ANXA6 PE=1 SV=1 - [H0YC77_HUMAN]	9.89	1	1	1	91	10.1281	7.21045	1.0269	1.20352	1.39485	1.20842	0.675293	0.952166	0.927172	0.851544	1.4191	0.0612103
A0A0G2JRQ8	MLX-interacting protein (Fragment) OS=Homo sapiens GN=MLXIP PE=4 SV=4 - [A0A0G2JRQ8_HUMAN]	8.22	1	1	1	73	8.29098	4.76709	0.860807	0.914617	0.957515	0.91098	1.15184	1.20075	0.898944	1.08384	0.840509	0.15129
Q59H95	Flightless I homolog variant (Fragment) OS=Homo sapiens PE=2 SV=1 - [Q59H95_HUMAN]	1.09	1	1	1	1101	125.198	5.26221	0.758422	1.52933	1.46575	1.25117	0.183527	1.17254	1.13892	0.831663	1.50442	0.361559
P59665	Neutrophil defensin 1 OS=Homo sapiens GN=DEFA1 PE=1 SV=1 - [DEF1_HUMAN]	19.15	2	2	5	94	10.1942	6.99072	1.09237	1.30963	0.733454	1.04515	0.822989	1.01068	1.32426	1.05264	0.992882	0.974773
B4DKZ9	cDNA FLJ55705, highly similar to Threonyl-tRNA synthetase, cytoplasmic (EC 6.1.1.3) OS=Homo sapiens PE=2 SV=1 - [B4DKZ9_HUMAN]	1	1	1	1	602	70.3158	8.55811	0.590073	1.38839	1.2572	1.07855	0.502449	1.32328	0.685648	0.837127	1.2884	0.52901
Q8TDY8	Immunoglobulin superfamily DCC subclass member 4 OS=Homo sapiens GN=IGDCC4 PE=1 SV=1 - [IGDC4_HUMAN]	0.8	1	1	1	1250	134.126	6.20166	0.973644	1.00464	0.998397	0.992226	1.05613	0.964505	0.920596	0.980409	1.01205	0.787641
B5MDP7	Papilin OS=Homo sapiens GN=PAPLN PE=1 SV=2 - [B5MDP7_HUMAN]	1.24	1	1	1	808	87.2188	7.29834	0.88331	0.958974	1.0163	0.952862	1.04518	0.966221	0.971592	0.994331	0.958295	0.419911
B4DJ06	cDNA FLJ56620 OS=Homo sapiens PE=2 SV=1 - [B4DJ06_HUMAN]	1.11	1	1	1	629	67.9044	4.90674	0.993797	0.980462	1.28689	1.08705	1.3535	0.697444	0.765036	0.938661	1.15809	0.555743
Q9UL86	Myosin-reactive immunoglobulin kappa chain variable region (Fragment) OS=Homo sapiens PE=2 SV=1 - [Q9UL86_HUMAN]	8.26	1	1	2	109	11.921	7.95752	1.06049	1.44228	0.682714	1.06183	1.14523	1.12922	1.39543	1.2233	0.868008	0.530788
O43150	Arf-GAP with SH3 domain, ANK repeat and PH domain-containing protein 2 OS=Homo sapiens GN=ASAP2 PE=1 SV=3 - [ASAP2_HUMAN]	1.39	1	1	1	1006	111.581	6.68311	1.15733	1.23153	0.935937	1.10826	0.555367	1.21119	0.743947	0.836835	1.32435	0.273846
P05771	Protein kinase C beta type OS=Homo sapiens GN=PRKCB PE=1 SV=4 - [KPCB_HUMAN]	2.68	2	2	2	671	76.8191	7.00537	0.989383	0.921317	1.03673	0.982477	0.785475	0.972942	1.04819	0.935535	1.05018	0.610136
F8VYZ1	Melanocyte protein PMEL (Fragment) OS=Homo sapiens GN=PMEL PE=1 SV=1 - [F8VYZ1_HUMAN]	5.22	1	1	3	134	15.0327	8.47021	0.967481	2.10611	0.555765	1.20978	0.977463	1.194	1.70592	1.29246	0.93603	0.879423
D6RHH7	Corticotropin-releasing factor-binding protein OS=Homo sapiens GN=CRHBP PE=1 SV=1 - [D6RHH7_HUMAN]	3.78	1	1	1	238	27.0648	7.15186	0.866012	0.881983	1.05801	0.935334	0.874268	1.14152	1.01724	1.01101	0.925148	0.486068
Q2TBE1	REG1A protein (Fragment) OS=Homo sapiens GN=REG1A PE=2 SV=2 - [Q2TBE1_HUMAN]	11.63	1	1	1	86	9.66934	4.14502	0.887728	0.867149	0.865054	0.87331	1.31789	1.42857	0.93366	1.22671	0.711914	0.0781927
P49588	Alanine--tRNA ligase, cytoplasmic OS=Homo sapiens GN=AARS PE=1 SV=2 - [SYAC_HUMAN]	1.65	1	1	1	968	106.743	5.52881	1.04732	1.26127	0.981535	1.09671	0.982152	0.957844	0.897441	0.945812	1.15954	0.16198
E9PQ14	Dipeptidyl peptidase 3 (Fragment) OS=Homo sapiens GN=DPP3 PE=1 SV=1 - [E9PQ14_HUMAN]	3.95	1	1	1	177	19.8069	5.94775	1.06975	1.0598	1.19022	1.10659	0.609795	0.938444	0.941636	0.829958	1.33331	0.0786505
D6R9K1	Claudin domain-containing protein 1 OS=Homo sapiens GN=CLDND1 PE=1 SV=1 - [D6R9K1_HUMAN]	10.34	1	1	1	87	9.68882	5.74463	0.943378	0.870148	1.30963	1.04105	0.579333	1.30659	0.69293	0.859619	1.21106	0.52916
Q6UVK1	Chondroitin sulfate proteoglycan 4 OS=Homo sapiens GN=CSPG4 PE=1 SV=2 - [CSPG4_HUMAN]	0.6	1	1	1	2322	250.382	5.46533	0.967902	1.24137	1.02973	1.07967	1.12517	0.990835	0.843486	0.986497	1.09444	0.467131
O15256	Parathymosin (Fragment) OS=Homo sapiens GN=PTMS PE=4 SV=1 - [O15256_HUMAN]	17.46	1	1	1	63	7.44688	9.5249	0.935767	0.828017	1.29358	1.01912	0.390125	1.33251	0.654249	0.792294	1.28629	0.509986
A0A0A7M1X5	Lamin B2, isoform CRA_b OS=Homo sapiens GN=LMNB2 PE=2 SV=1 - [A0A0A7M1X5_HUMAN]	2.48	1	1	1	483	53.5251	7.12256	0.694189	0.99163	0.912155	0.865991	1.0222	0.918567	1.13001	1.02359	0.846032	0.217734
Q04760	Lactoylglutathione lyase OS=Homo sapiens GN=GLO1 PE=1 SV=4 - [LGUL_HUMAN]	8.15	2	2	2	184	20.7642	5.31299	1.06411	0.943803	1.02657	1.0115	0.794377	1.02517	1.05261	0.957387	1.05652	0.577138
Q6UWP8	Suprabasin OS=Homo sapiens GN=SBSN PE=1 SV=2 - [SBSN_HUMAN]	2.37	1	1	1	590	60.5046	7.00537	1.0015	0.738631	1.06215	0.934093	1.09212	0.832243	1.00288	0.975748	0.95731	0.756027
Q07507	Dermatopontin OS=Homo sapiens GN=DPT PE=1 SV=2 - [DERM_HUMAN]	5.47	1	1	1	201	23.9888	4.81787	0.844059	1.00753	1.33953	1.0637	0.658713	0.867111	0.880239	0.802021	1.32628	0.182535
Q15365	Poly(rC)-binding protein 1 OS=Homo sapiens GN=PCBP1 PE=1 SV=2 - [PCBP1_HUMAN]	6.18	2	2	2	356	37.4739	7.09326	0.947832	0.908157	1.04047	0.965488	0.761259	1.0345	1.0006	0.932121	1.0358	0.741856
A6PVN7	Serine/threonine-protein phosphatase 2A activator (Fragment) OS=Homo sapiens GN=PTPA PE=1 SV=1 - [A6PVN7_HUMAN]	20.31	1	1	1	64	7.39591	8.47021	0.830062	1.08533	1.23212	1.04917	0.530556	1.14881	0.926881	0.868749	1.20768	0.44982
Q0ZCI2	Immunglobulin heavy chain variable region (Fragment) OS=Homo sapiens PE=4 SV=1 - [Q0ZCI2_HUMAN]	14.75	2	2	3	122	13.3157	9.1001	0.920907	2.38229	0.419358	1.24085	1.2152	1.01866	2.22782	1.48723	0.834339	0.741879
A7LNF5	Nucleobindin 2 (Fragment) OS=Homo sapiens GN=NUCB2 PE=2 SV=1 - [A7LNF5_HUMAN]	15.94	1	1	1	69	8.0212	4.83057	1.18525	0.90027	0.88293	0.989482	1.13119	1.04402	1.09673	1.09065	0.907244	0.3742
A0A068LKQ2	Ig heavy chain variable region (Fragment) OS=Homo sapiens PE=2 SV=1 - [A0A068LKQ2_HUMAN]	18.33	1	2	3	120	13.1496	9.0708	1.0339	1.61179	0.84876	1.16482	0.944169	0.975771	1.33313	1.08436	1.0742	0.773639
H7BZ09	Acidic leucine-rich nuclear phosphoprotein 32 family member A OS=Homo sapiens GN=ANP32A PE=1 SV=1 - [H7BZ09_HUMAN]	10.13	1	1	1	79	9.18189	9.18799	1.01885	1.11436	1.15924	1.09748	0.771668	1.1119	0.846872	0.910148	1.20583	0.167281
Q9NZN3	EH domain-containing protein 3 OS=Homo sapiens GN=EHD3 PE=1 SV=2 - [EHD3_HUMAN]	4.86	1	3	3	535	60.8487	6.56592	0.98977	0.919608	1.09966	1.00301	0.743182	1.03671	0.971661	0.917185	1.09358	0.452697
Q8WWQ8	Stabilin-2 OS=Homo sapiens GN=STAB2 PE=1 SV=3 - [STAB2_HUMAN]	0.55	1	1	1	2551	276.805	6.40479	0.783737	0.801445	0.919388	0.834856	0.924036	0.678356	0.81367	0.805354	1.03663	0.739674
A9UFC0	Caspase 14 OS=Homo sapiens GN=CASP14 PE=2 SV=1 - [A9UFC0_HUMAN]	5.37	1	1	2	242	27.6489	5.33838	0.921337	1.02618	1.0437	0.997071	1.00332	1.0493	1.04716	1.03326	0.964976	0.427652
Q7Z4C7	MSTP128 OS=Homo sapiens PE=2 SV=1 - [Q7Z4C7_HUMAN]	2.69	1	1	1	297	35.6381	5.41455	0.896766	1.20563	1.16614	1.08951	0.701016	1.02354	1.09188	0.93881	1.16053	0.385241
B4DLF7	cDNA FLJ60294 OS=Homo sapiens PE=2 SV=1 - [B4DLF7_HUMAN]	2.28	1	1	1	964	105.055	9.15869	1.29729	1.2271	0.871684	1.13203	1.74482	1.15679	1.30406	1.40189	0.807499	0.287911
Q9H3P7	Golgi resident protein GCP60 OS=Homo sapiens GN=ACBD3 PE=1 SV=4 - [GCP60_HUMAN]	1.14	1	1	1	528	60.556	5.05908	0.918495	0.851301	0.861477	0.877091	1.29742	0.879306	1.13898	1.10524	0.793578	0.138785
F4MH92	Ubiquitously transcribed tetratricopeptide repeat protein Y-linked transcript variant 62 OS=Homo sapiens GN=UTY PE=2 SV=1 - [F4MH92_HUMAN]	1.17	1	1	1	1367	151.469	7.48877	0.94137	2.53122	0.448842	1.30714	1.50506	1.0229	1.66144	1.39647	0.936036	0.898432
B4DN39	cDNA FLJ53065, highly similar to T-complex protein 1 subunit zeta OS=Homo sapiens PE=2 SV=1 - [B4DN39_HUMAN]	5.4	1	1	1	389	42.8875	6.62451	1.07688	1.02116	1.25369	1.11724	0.85364	1.13881	0.967681	0.986709	1.13229	0.295426
H7BXL6	Otogelin-like protein (Fragment) OS=Homo sapiens GN=OTOGL PE=4 SV=1 - [H7BXL6_HUMAN]	2.79	1	1	2	752	85.0222	5.04639	2.76624	2.03417	0.690246	1.83022	0.857358	0.693408	1.22057	0.923777	1.98124	0.222119
A5D8Z4	WNK1 protein (Fragment) OS=Homo sapiens GN=WNK1 PE=2 SV=1 - [A5D8Z4_HUMAN]	0.72	1	1	2	1537	159.423	6.52197	0.930902	0.996332	1.00061	0.975949	1.07799	1.10311	0.925268	1.03546	0.94253	0.377246
F8VXL2	Dynein light chain 1, cytoplasmic OS=Homo sapiens GN=DYNLL1 PE=1 SV=1 - [F8VXL2_HUMAN]	14.89	1	1	1	47	5.42265	5.33838	1.04905	0.877512	1.17732	1.03463	0.622357	1.06401	1.02674	0.90437	1.14403	0.476395
D3DXE4	KIAA0773 gene product, isoform CRA_b OS=Homo sapiens GN=KIAA0773 PE=4 SV=1 - [D3DXE4_HUMAN]	8.67	1	1	1	300	32.2158	4.42432	0.870277	1.28089	1.1603	1.10382	1.06333	1.20947	1.52881	1.26721	0.871066	0.423976
Q59FI2	Protein tyrosine phosphatase, receptor type, F isoform 2 variant (Fragment) OS=Homo sapiens PE=2 SV=1 - [Q59FI2_HUMAN]	2.45	3	3	3	1552	174.769	6.63916	0.998505	0.871517	0.910943	0.926988	1.11351	1.04355	0.903332	1.02013	0.908696	0.267092
Q96K23	cDNA FLJ14838 fis, clone OVARC1001726, weakly similar to APICAL-LIKE PROTEIN OS=Homo sapiens PE=2 SV=1 - [Q96K23_HUMAN]	2.33	1	1	1	258	27.9931	6.63916	1.68049	1.65424	0.292346	1.20903	1.81699	1.16186	1.49167	1.49017	0.811333	0.601043
T2HK55	NADH-ubiquinone oxidoreductase chain 1 OS=Homo sapiens GN=ndh1 PE=3 SV=1 - [T2HK55_HUMAN]	8.81	1	1	2	318	35.64	5.93506	1.53046	1.16019	0.434584	1.04175	1.06299	1.14986	0.46489	0.892579	1.16712	0.719681
A0A059QQL5	NADH-ubiquinone oxidoreductase chain 1 OS=Homo sapiens GN=ND1 PE=3 SV=1 - [A0A059QQL5_HUMAN]	3.14	1	1	2	318	35.551	5.93506	0.508907	2.48717	0.231342	1.07581	0.901207	0.947934	4.05624	1.96846	0.546523	0.518598
O00602	Ficolin-1 OS=Homo sapiens GN=FCN1 PE=1 SV=2 - [FCN1_HUMAN]	4.91	2	2	2	326	35.0561	6.85889	1.01172	1.21777	0.98233	1.07061	0.898324	0.950301	1.03324	0.960621	1.1145	0.259812
J3QS68	E3 ubiquitin-protein ligase RNF135 (Fragment) OS=Homo sapiens GN=RNF135 PE=1 SV=8 - [J3QS68_HUMAN]	6.33	1	1	1	158	17.4286	7.92822	1.10316	1.04729	0.774211	0.974887	1.19911	1.02559	1.18822	1.13764	0.856938	0.233551
B3KXG0	cDNA FLJ45349 fis, clone BRHIP3011460, highly similar to Homo sapiens Src homology 3 domain-containing guanine nucleotide exchange factor (SGEF), mRNA OS=Homo sapiens PE=2 SV=1 - [B3KXG0_HUMAN]	1.26	1	1	1	871	97.192	8.95361	0.979661	1.02208	0.995752	0.999165	1.06991	0.979355	1.00291	1.01739	0.982086	0.573971
F5GWB1	Coiled-coil domain-containing protein 91 OS=Homo sapiens GN=CCDC91 PE=1 SV=1 - [F5GWB1_HUMAN]	2.25	1	1	1	267	29.3277	4.83057	0.81598	1.02416	1.033	0.957714	1.19687	0.959761	0.954026	1.03689	0.923643	0.500085
Q96NM1	HCG1990367 OS=Homo sapiens GN=FLJ30594 PE=2 SV=1 - [Q96NM1_HUMAN]	3.77	1	1	1	159	17.3529	9.64209	0.983624	1.17201	0.88625	1.01396	1.24983	1.02989	0.970271	1.08333	0.935967	0.592489
K7EIU0	Hsp90 co-chaperone Cdc37 (Fragment) OS=Homo sapiens GN=CDC37 PE=1 SV=1 - [K7EIU0_HUMAN]	6.73	1	1	1	104	11.6478	5.0083	1.01651	0.936755	1.243	1.06542	0.422059	1.02932	1.07808	0.843154	1.26361	0.388749
Q6PCC8	URB2 protein (Fragment) OS=Homo sapiens GN=URB2 PE=2 SV=1 - [Q6PCC8_HUMAN]	0.63	1	1	1	957	107.247	7.91357	1.46077	1.79895	0.44749	1.23574	1.26272	1.45449	1.39153	1.36958	0.902274	0.760418
Q8WU23	POLE protein OS=Homo sapiens PE=2 SV=1 - [Q8WU23_HUMAN]	3.78	1	1	2	370	41.4852	4.80518	1.02652	0.813909	0.815951	0.885459	0.824683	1.06647	0.952559	0.947904	0.934123	0.563409
B4E006	cDNA FLJ53119, highly similar to ADP-ribosyl cyclase 1 (EC 3.2.2.5) OS=Homo sapiens PE=2 SV=1 - [B4E006_HUMAN]	11.25	1	1	1	160	17.9172	8.96826	1.13909	1.43079	0.698491	1.08946	0.607073	1.41187	2.0514	1.35678	0.802973	0.59913
A0A0A0N0L2	IL6ST isoform 4 OS=Homo sapiens GN=IL6ST PE=2 SV=1 - [A0A0A0N0L2_HUMAN]	4.55	4	4	5	857	96.2157	5.89697	1.06041	1.04231	0.905401	1.00271	0.985432	1.10149	1.01749	1.03481	0.968981	0.620636
B4DIR5	cDNA FLJ56026 OS=Homo sapiens PE=2 SV=1 - [B4DIR5_HUMAN]	0.61	1	1	2	1147	127.054	6.7124	0.886054	1.03928	0.912837	0.946058	1.12964	0.879851	1.01907	1.00952	0.937138	0.50311
H7C557	Multiple epidermal growth factor-like domains protein 6 OS=Homo sapiens GN=MEGF6 PE=1 SV=2 - [H7C557_HUMAN]	1.89	1	1	1	1323	138.306	6.62451	0.931933	0.839554	1.05574	0.94241	1.10082	0.926774	1.13328	1.05363	0.894445	0.282455
A8K4W5	cDNA FLJ76813, highly similar to Homo sapiens acetyl-Coenzyme A acetyltransferase 2 (acetoacetyl Coenzyme A thiolase), mRNA OS=Homo sapiens PE=2 SV=1 - [A8K4W5_HUMAN]	2.77	1	1	1	397	41.3524	6.91748	0.903829	1.38355	0.902243	1.06321	0.959748	1.19288	0.857782	1.00347	1.05953	0.767039
Q6ZRP2	cDNA FLJ46208 fis, clone TESTI4010979 OS=Homo sapiens PE=2 SV=1 - [Q6ZRP2_HUMAN]	4.32	1	1	1	139	15.3612	9.02686	0.99573	0.948716	1.15776	1.03407	0.572592	1.08434	1.11739	0.924774	1.11818	0.590996
Q1LZN2	NOMO3 protein (Fragment) OS=Homo sapiens GN=NOMO3 PE=2 SV=1 - [Q1LZN2_HUMAN]	0.87	1	1	1	807	89.7607	5.66846	0.928774	1.03051	0.923837	0.96104	1.21666	1.03054	1.00213	1.08311	0.887297	0.182264
B4E2Q7	cDNA FLJ51461, highly similar to Cohesin subunit SA-1 OS=Homo sapiens PE=2 SV=1 - [B4E2Q7_HUMAN]	0.83	1	1	1	842	96.5796	5.2749	1.1111	0.897814	1.0866	1.03184	1.12773	0.954756	0.943388	1.00862	1.02302	0.809148
A0A0B4J1R4	4-hydroxyphenylpyruvate dioxygenase OS=Homo sapiens GN=HPD PE=1 SV=1 - [A0A0B4J1R4_HUMAN]	2.04	1	1	1	393	44.9359	7.00537	0.984254	1.66496	0.867065	1.17209	1.07495	1.09394	0.846988	1.00529	1.16592	0.55767
Q9C0D2	Centrosomal protein of 295 kDa OS=Homo sapiens GN=CEP295 PE=1 SV=4 - [CE295_HUMAN]	0.38	1	1	1	2601	294.996	5.99854	1.16259	2.07412	0.900522	1.37908	0.504823	0.423379	0.596109	0.508104	2.71417	0.072359
M0R261	6-phosphogluconolactonase (Fragment) OS=Homo sapiens GN=PGLS PE=1 SV=1 - [M0R261_HUMAN]	6.94	1	1	1	216	22.9821	5.85889	1.25071	1.2945	0.809836	1.11835	0.926952	1.22805	1.25209	1.1357	0.984727	0.930486
A9UK01	Rho GTPase activating protein OS=Homo sapiens PE=2 SV=1 - [A9UK01_HUMAN]	1.96	1	1	1	663	74.9309	6.17627	1.12403	0.838651	1.19643	1.05304	0.510628	0.980094	1.00372	0.831481	1.26646	0.317576
Q3LIE3	Uncharacterized protein Nbla04137 (Fragment) OS=Homo sapiens GN=Nbla04137 PE=2 SV=1 - [Q3LIE3_HUMAN]	3.11	1	1	1	289	33.326	5.21143	0.991493	0.974433	0.904247	0.956724	1.11076	0.871532	0.981853	0.988047	0.968298	0.694257
Q2TBD1	NEBL protein OS=Homo sapiens GN=NEBL PE=2 SV=1 - [Q2TBD1_HUMAN]	1.12	1	1	3	716	82.5371	8.39697	1.02187	1.12747	0.801373	0.983569	1.3875	1.02893	1.15774	1.19139	0.825565	0.217738
B4DQW7	cDNA FLJ54378, highly similar to Golgin subfamily B member 1 (Fragment) OS=Homo sapiens PE=2 SV=1 - [B4DQW7_HUMAN]	0.9	1	1	2	889	101.865	4.7417	0.957187	0.754147	1.06421	0.925182	0.896325	1.1644	1.0916	1.05077	0.880477	0.358386
Q14191	Werner syndrome ATP-dependent helicase OS=Homo sapiens GN=WRN PE=1 SV=2 - [WRN_HUMAN]	0.84	1	1	1	1432	162.357	6.34131	0.60635	0.505019	1.70358	0.938316	0.398389	0.650625	0.560002	0.536339	1.74948	0.361768
B4DUR8	T-complex protein 1 subunit gamma OS=Homo sapiens GN=CCT3 PE=1 SV=1 - [B4DUR8_HUMAN]	1.6	1	1	1	500	55.6387	5.64307	0.980228	0.940202	1.11864	1.01302	0.67401	1.11738	0.847624	0.879672	1.15159	0.394347
Q53TG4	Uncharacterized protein NCK2 (Fragment) OS=Homo sapiens GN=NCK2 PE=4 SV=1 - [Q53TG4_HUMAN]	2.63	1	1	1	304	33.9428	6.3667	1.09413	0.937932	0.864189	0.965416	1.09704	1.35568	1.1488	1.20051	0.804171	0.0868468
A0A0C4DH39	Immunoglobulin heavy variable 1-58 OS=Homo sapiens GN=IGHV1-58 PE=3 SV=1 - [HV158_HUMAN]	5.98	1	1	1	117	12.9965	9.24658	0.706892	3.25522	0.23442	1.39884	1.41357	0.960092	2.17964	1.51777	0.921645	0.911367
H0YA14	cGMP-specific 3',5'-cyclic phosphodiesterase (Fragment) OS=Homo sapiens GN=PDE5A PE=1 SV=1 - [H0YA14_HUMAN]	8.11	1	1	1	185	21.537	6.32861	0.975915	0.94982	1.02215	0.982629	0.774522	1.17182	0.848083	0.931474	1.05492	0.700761
B1B5R8	N-acylsphingosine amidohydrolase 1 (Fragment) OS=Homo sapiens GN=ASAH1 PE=4 SV=1 - [B1B5R8_HUMAN]	9.2	1	1	1	174	19.6322	7.43018	0.911234	1.55538	0.723027	1.06321	1.13129	1.1129	1.14076	1.12832	0.9423	0.80899
B7Z6W6	cDNA FLJ52268, highly similar to Intercellular adhesion molecule 3 OS=Homo sapiens PE=2 SV=1 - [B7Z6W6_HUMAN]	6.62	1	1	1	151	16.8274	7.06396	0.881374	1.24944	1.01304	1.04795	1.01932	1.0194	1.13062	1.05645	0.991958	0.944115
B3KXB6	cDNA FLJ45101 fis, clone BRAWH3032298, highly similar to Tenascin-N OS=Homo sapiens PE=2 SV=1 - [B3KXB6_HUMAN]	1.85	1	1	1	1299	143.815	5.63037	1.22233	1.17545	0.441928	0.946569	0.892914	1.31339	1.25969	1.15533	0.819304	0.504668
Q9UFH1	Uncharacterized protein DKFZp434J0650 (Fragment) OS=Homo sapiens GN=DKFZp434J0650 PE=2 SV=1 - [Q9UFH1_HUMAN]	6.6	1	1	1	106	12.0877	8.57275	1.69509	1.46923	0.509317	1.22455	1.1433	1.07012	1.24716	1.15353	1.06157	0.856029
O95755	Ras-related protein Rab-36 OS=Homo sapiens GN=RAB36 PE=2 SV=2 - [RAB36_HUMAN]	3.3	1	1	1	333	36.2994	7.85498	1.00375	0.776519	1.06608	0.948785	1.06179	1.05153	1.12143	1.07825	0.879931	0.226434
B3KPC9	cDNA FLJ31622 fis, clone NT2RI2003220, highly similar to Zinc finger protein 337 OS=Homo sapiens PE=2 SV=1 - [B3KPC9_HUMAN]	1.77	1	1	1	622	71.9646	9.70068	1.3817	0.901945	0.479119	0.920922	0.966505	0.934698	1.05035	0.983852	0.936037	0.822649
H0YIJ6	Phosphatidylinositol 5-phosphate 4-kinase type-2 gamma (Fragment) OS=Homo sapiens GN=PIP4K2C PE=1 SV=8 - [H0YIJ6_HUMAN]	5.97	1	1	2	134	15.5359	5.10986	0.950788	0.964568	0.89071	0.935356	1.02541	0.97737	1.07302	1.02527	0.912305	0.065601
A0N5G7	Rheumatoid factor D5 heavy chain (Fragment) OS=Homo sapiens GN=VH3 PE=2 SV=1 - [A0N5G7_HUMAN]	9.24	1	1	1	119	12.9784	8.93896	0.967896	1.63033	0.688392	1.09554	1.07648	1.20564	1.45679	1.2463	0.879032	0.642546
X5D7P8	Serine threonine kinase 39 isoform D (Fragment) OS=Homo sapiens GN=STK39 PE=2 SV=1 - [X5D7P8_HUMAN]	3.58	1	1	1	475	52.2329	6.25244	1.04725	1.01898	1.06216	1.0428	1.22998	0.944715	0.846015	1.0069	1.03565	0.772088
Q6PID9	Aggrecan OS=Homo sapiens GN=ACAN PE=1 SV=1 - [Q6PID9_HUMAN]	1.94	1	1	1	721	79.565	5.05908	1.07154	0.952364	0.966498	0.9968	0.907252	0.970335	1.04235	0.973314	1.02413	0.687065
Q86XI8	Uncharacterized protein ZSWIM9 OS=Homo sapiens GN=ZSWIM9 PE=1 SV=2 - [ZSWM9_HUMAN]	1.59	1	1	1	627	70.029	8.57275	0.999989	1.97746	0.699244	1.22557	1.12995	0.97992	1.53442	1.21476	1.00889	0.980706
Q9H2L9	AD034 OS=Homo sapiens PE=2 SV=1 - [Q9H2L9_HUMAN]	1.83	1	1	1	327	38.0191	7.13721	0.477233	1.34213	1.41012	1.07649	0.605142	1.55518	0.749755	0.970027	1.10976	0.812957
I6L957	HNRNPA2B1 protein OS=Homo sapiens GN=HNRNPA2B1 PE=2 SV=1 - [I6L957_HUMAN]	4.02	1	1	1	249	28.3941	4.85596	0.622568	0.627911	1.99603	1.08217	0.343789	1.02096	0.939916	0.768221	1.40867	0.567355
A1L159	IKBKB protein (Fragment) OS=Homo sapiens GN=IKBKB PE=2 SV=1 - [A1L159_HUMAN]	8.33	1	1	1	132	14.8573	4.83057	1.0308	0.77219	1.01994	0.940977	1.00779	1.14304	0.856831	1.00255	0.93858	0.629836
I3L3H7	Collagen alpha-1(I) chain (Fragment) OS=Homo sapiens GN=COL1A1 PE=1 SV=1 - [I3L3H7_HUMAN]	7.79	1	1	1	154	16.35	5.69385	0.749882	1.02281	0.976289	0.916328	0.791276	0.889524	0.855271	0.845357	1.08395	0.470236
C9JBE7	WD repeat-containing protein 53 OS=Homo sapiens GN=WDR53 PE=1 SV=1 - [C9JBE7_HUMAN]	4.02	1	1	1	199	21.9611	7.40088	0.742269	2.668	1.31716	1.57581	0.6063	0.506147	0.524916	0.545787	2.88722	0.145889
Q9Y657	Spindlin-1 OS=Homo sapiens GN=SPIN1 PE=1 SV=3 - [SPIN1_HUMAN]	5.34	1	1	1	262	29.5818	6.96143	0.854606	1.15676	0.986004	0.999122	1.24914	0.837073	0.996436	1.02755	0.972334	0.85748
B4E1R1	cDNA FLJ52389, highly similar to Alcohol dehydrogenase 1B (EC 1.1.1.1) OS=Homo sapiens PE=2 SV=1 - [B4E1R1_HUMAN]	4.82	1	1	1	166	17.9103	8.06006	0.801088	1.47881	0.876376	1.05209	1.04149	1.3786	0.881346	1.10048	0.956032	0.861294
Q9P172	PRO2281 OS=Homo sapiens PE=2 SV=1 - [Q9P172_HUMAN]	5.17	1	1	1	329	37.2228	5.21143	0.977832	1.11917	1.13215	1.07638	1.1136	0.833884	1.04379	0.997094	1.07952	0.461751
A2VCK2	Doublecortin domain-containing protein 2B OS=Homo sapiens GN=DCDC2B PE=1 SV=1 - [DCD2B_HUMAN]	3.72	1	1	1	349	37.6414	8.79248	0.995123	1.45869	0.950037	1.13462	0.918246	0.773697	0.776717	0.822887	1.37882	0.139583
F5H726	T-complex protein 1 subunit alpha (Fragment) OS=Homo sapiens GN=TCP1 PE=1 SV=1 - [F5H726_HUMAN]	10.99	1	1	1	91	9.5131	4.70361	1.1048	1.47773	0.944	1.17551	0.90922	0.913413	0.865715	0.896116	1.31178	0.153345
G3V357	Ribonuclease pancreatic OS=Homo sapiens GN=RNASE1 PE=1 SV=1 - [G3V357_HUMAN]	6.03	1	1	1	116	13.0409	7.91357	1.00969	1.17129	0.730595	0.970525	1.50593	1.00881	1.211	1.24191	0.781477	0.233189
D3DSP9	Fibrinogen-like 1, isoform CRA_d OS=Homo sapiens GN=FGL1 PE=4 SV=1 - [D3DSP9_HUMAN]	3.56	1	1	1	253	29.4179	5.80811	0.832765	0.904143	1.05162	0.929511	0.800341	0.823617	0.993504	0.872488	1.06536	0.555091
Q16393	LFA-3 (Fragment) OS=Homo sapiens PE=2 SV=1 - [Q16393_HUMAN]	8.4	1	1	1	119	13.723	7.37158	0.901271	0.911781	1.14589	0.986314	1.06407	0.93146	0.962821	0.986118	1.0002	0.99835
H0YLI4	LRP chaperone MESD OS=Homo sapiens GN=MESD PE=1 SV=1 - [H0YLI4_HUMAN]	11.25	1	1	1	80	8.69543	7.07861	0.855272	0.925852	1.19659	0.992573	0.640559	0.980227	1.04279	0.887859	1.11794	0.554631
K7EQ37	Protein unc-13 homolog D (Fragment) OS=Homo sapiens GN=UNC13D PE=1 SV=1 - [K7EQ37_HUMAN]	4.12	1	1	1	267	30.6616	6.16357	0.958419	1.0857	1.05436	1.03283	0.832015	1.01925	1.10705	0.986105	1.04738	0.629927
A9JR48	SALL3 protein OS=Homo sapiens GN=SALL3 PE=1 SV=1 - [A9JR48_HUMAN]	1.67	1	1	1	959	101.47	7.31299	0.918901	0.759623	0.868053	0.848859	1.12938	1.07994	0.924478	1.0446	0.812617	0.0651209
B7Z4J0	cDNA FLJ55790, highly similar to CLIP-associating protein 1 OS=Homo sapiens PE=2 SV=1 - [B7Z4J0_HUMAN]	2.73	1	1	1	440	48.487	6.72705	0.933423	0.957308	1.05337	0.981366	0.758947	0.939482	0.960473	0.886301	1.10726	0.266735
A2N0S5	VH6DJ protein (Fragment) OS=Homo sapiens GN=VH6DJ PE=2 SV=1 - [A2N0S5_HUMAN]	14.91	1	2	11	114	12.5221	8.88037	1.08128	1.53375	0.815998	1.14368	0.987701	1.02848	1.02994	1.01537	1.12636	0.574223
A0A087X2B3	Neuronal cell adhesion molecule OS=Homo sapiens GN=NRCAM PE=1 SV=1 - [A0A087X2B3_HUMAN]	1.43	1	1	1	771	85.2943	5.52881	0.964183	1.1792	1.01849	1.05396	0.887824	0.867571	0.945146	0.90018	1.17083	0.0884828
H0Y984	ADP-ribosyl cyclase/cyclic ADP-ribose hydrolase 2 (Fragment) OS=Homo sapiens GN=BST1 PE=1 SV=1 - [H0Y984_HUMAN]	8.6	2	2	2	186	21.068	5.57959	0.755989	0.651301	2.35231	1.2532	0.786054	0.627676	0.619074	0.677601	1.84946	0.356756
Q9UBQ7	Glyoxylate reductase/hydroxypyruvate reductase OS=Homo sapiens GN=GRHPR PE=1 SV=1 - [GRHPR_HUMAN]	5.49	1	1	1	328	35.6457	7.38623	1.02453	0.968952	0.914517	0.969334	0.951821	1.17469	1.23614	1.12088	0.864796	0.174944
B7Z7F6	cDNA FLJ51136, weakly similar to Aquaporin-7 OS=Homo sapiens PE=2 SV=1 - [B7Z7F6_HUMAN]	5.67	1	1	1	141	15.4289	9.65674	1.06261	1.0898	0.919832	1.02408	1.06749	1.21788	1.02656	1.10398	0.92763	0.366315
Q9NY43	BarH-like 2 homeobox protein OS=Homo sapiens GN=BARHL2 PE=1 SV=2 - [BARH2_HUMAN]	3.36	1	1	1	387	41.9549	8.54346	1.07705	0.847763	1.04894	0.991253	1.15705	0.909386	1.00958	1.02534	0.966758	0.75485
M0QZP7	Distal membrane-arm assembly complex protein 2 (Fragment) OS=Homo sapiens GN=DMAC2 PE=1 SV=1 - [M0QZP7_HUMAN]	7.33	1	1	2	150	16.9353	5.04639	1.1267	0.890033	0.896493	0.971077	1.08476	0.994158	1.04138	1.0401	0.933637	0.447898
P58166	Inhibin beta E chain OS=Homo sapiens GN=INHBE PE=1 SV=1 - [INHBE_HUMAN]	3.43	1	1	1	350	38.537	9.24658	0.845482	1.51738	0.734995	1.03262	1.09248	1.15112	1.15598	1.13319	0.911246	0.702832
Q53SQ6	Uncharacterized protein PTD004 (Fragment) OS=Homo sapiens GN=PTD004 PE=4 SV=1 - [Q53SQ6_HUMAN]	6.57	1	1	1	213	24.788	9.18799	0.99069	0.881892	1.10394	0.992174	0.651961	1.0748	1.001	0.909256	1.09119	0.598766
B3KUR3	cDNA FLJ40459 fis, clone TESTI2041800, highly similar to BISPHOSPHOGLYCERATE MUTASE (EC 5.4.2.4) OS=Homo sapiens PE=2 SV=1 - [B3KUR3_HUMAN]	11.16	2	2	2	242	27.9744	5.84619	1.13448	0.832434	1.03401	1.00031	1.18342	0.914735	1.24051	1.11289	0.898838	0.448315
H9E7F6	Cytochrome c oxidase subunit 1 OS=Homo sapiens GN=COX1 PE=3 SV=1 - [H9E7F6_HUMAN]	7.21	1	1	1	513	57.014	6.69775	1.46868	0.6331		1.05089	0.978893	0.879616	1.20042	1.01964	1.03065	0.931482
B3KSD3	cDNA FLJ36024 fis, clone TESTI2016667, highly similar to Homo sapiens zinc finger CCCH-type containing 12A (ZC3H12A), mRNA OS=Homo sapiens PE=2 SV=1 - [B3KSD3_HUMAN]	1.52	1	1	1	394	41.7097	8.14795	0.958946	0.93141	1.14889	1.01308	0.808285	0.94415	0.950111	0.900849	1.12459	0.24569
E9PM35	Beta-arrestin-1 (Fragment) OS=Homo sapiens GN=ARRB1 PE=1 SV=8 - [E9PM35_HUMAN]	19.46	3	3	4	257	29.1501	7.40088	1.13528	0.904842	1.13423	1.05812	0.677266	0.983899	1.01191	0.891025	1.18753	0.273547
K7ELP7	Keratin, type I cytoskeletal 17 (Fragment) OS=Homo sapiens GN=KRT17 PE=1 SV=1 - [K7ELP7_HUMAN]	12.24	1	1	8	49	5.50775	4.58936	1.54761	1.4853	0.378148	1.13702	1.67132	1.36089	1.51674	1.51631	0.749858	0.386167
H0Y9C7	N(4)-(beta-N-acetylglucosaminyl)-L-asparaginase (Fragment) OS=Homo sapiens GN=AGA PE=1 SV=8 - [H0Y9C7_HUMAN]	14.94	2	2	2	154	16.9473	6.26514	0.959769	1.14422	0.831885	0.978625	0.986839	0.922074	1.11288	1.00727	0.971566	0.801411
B7Z570	cDNA FLJ53078, highly similar to Splicing factor, arginine/serine-rich 1 OS=Homo sapiens PE=2 SV=1 - [B7Z570_HUMAN]	11.19	1	1	2	143	16.2101	11.0923	0.972597	0.919266	0.799963	0.897275	1.05091	1.20486	1.45972	1.2385	0.724488	0.0580963
C5IJI6	Glutamate receptor 1 variant (Fragment) OS=Homo sapiens GN=GRIA1 PE=2 SV=1 - [C5IJI6_HUMAN]	27.12	1	1	1	59	6.62046	9.92041	0.965708	0.920571	0.786975	0.891085	1.2448	0.86822	1.10063	1.07122	0.831844	0.214232
Q8NF80	FLJ00275 protein (Fragment) OS=Homo sapiens GN=FLJ00275 PE=2 SV=1 - [Q8NF80_HUMAN]	6.02	2	2	2	382	41.0253	6.04932	1.25153	0.913754	0.94876	1.03802	1.03132	0.934601	0.933662	0.966528	1.07396	0.558076
Q59EJ0	Aldehyde dehydrogenase 1A1 variant (Fragment) OS=Homo sapiens PE=2 SV=1 - [Q59EJ0_HUMAN]	5.76	2	2	2	330	35.7572	6.23975	1.00469	1.1949	0.804615	1.0014	1.13574	1.21349	1.19105	1.18009	0.848578	0.195252
B8ZWD8	Diazepam binding inhibitor, splice form 1D(1) OS=Homo sapiens GN=DBI PE=2 SV=1 - [B8ZWD8_HUMAN]	12.7	1	1	1	63	7.2677	8.93896	1.03035	1.02144	1.00187	1.01789	0.791583	1.00697	1.1389	0.979152	1.03956	0.722321
Q3ZCT3	SPON1 protein (Fragment) OS=Homo sapiens GN=SPON1 PE=2 SV=1 - [Q3ZCT3_HUMAN]	6.61	1	1	1	257	29.5897	7.94287	0.922398	1.25521	0.741328	0.97298	1.09058	1.00409	1.0419	1.04553	0.930613	0.659207
Q9UH97	Hematopoietic progenitor cell antigen CD34 (Fragment) OS=Homo sapiens GN=CD34 PE=2 SV=1 - [Q9UH97_HUMAN]	4.15	1	1	1	193	20.6966	7.15186	0.94626	1.05314	1.05987	1.01976	1.03798	0.891899	0.936373	0.955417	1.06734	0.320414
H3BPC3	Structure-specific endonuclease subunit SLX1 OS=Homo sapiens GN=SLX1A PE=4 SV=1 - [H3BPC3_HUMAN]	13.58	1	1	1	81	8.92773	11.7808	1.21573	1.51373	0.747048	1.15884	1.1866	0.920652	1.67252	1.25992	0.919766	0.763219
F8W9T3	Sorting nexin-4 (Fragment) OS=Homo sapiens GN=SNX4 PE=1 SV=1 - [F8W9T3_HUMAN]	16.77	1	1	1	155	18.5525	6.69775	1.90248	1.89365	0.479417	1.42518	0.809434	1.94954	0.683014	1.14733	1.24218	0.677802
D6R9W4	Drebrin (Fragment) OS=Homo sapiens GN=DBN1 PE=1 SV=1 - [D6R9W4_HUMAN]	2.52	1	1	1	317	36.449	5.13525	0.932728	1.03738	1.05989	1.01	1.005	0.854396	1.05177	0.970388	1.04082	0.608011
F2Z2G5	WAP four-disulfide core domain protein 3 OS=Homo sapiens GN=WFDC3 PE=4 SV=1 - [F2Z2G5_HUMAN]	9.57	1	1	1	94	10.0289	5.94775	1.05823	1.16036	0.909671	1.04276	0.937637	0.942507	0.939972	0.940039	1.10927	0.23106
O43876	Olfactory receptor (Fragment) OS=Homo sapiens GN=OR17-130 PE=3 SV=1 - [O43876_HUMAN]	6.02	1	1	1	216	23.673	6.88818	0.852147	0.988936	0.986802	0.942628	1.23153	0.962033	1.13494	1.1095	0.849597	0.140256
D6RC18	Pre-mRNA-splicing factor ISY1 homolog OS=Homo sapiens GN=ISY1 PE=1 SV=1 - [D6RC18_HUMAN]	5.65	1	1	1	124	14.3024	8.27979	0.983359	0.954012	0.951596	0.962989	1.11548	0.909021	1.09263	1.03904	0.926804	0.314245
H0Y8R5	Receptor of-activated protein C kinase 1 (Fragment) OS=Homo sapiens GN=RACK1 PE=1 SV=1 - [H0Y8R5_HUMAN]	9.42	1	1	2	138	15.1904	7.31299	1.21625	0.821321	1.02986	1.02248	1.09868	0.75935	0.949698	0.935909	1.09249	0.595996
H7BXD8	Galectin (Fragment) OS=Homo sapiens GN=LGALS8 PE=1 SV=1 - [H7BXD8_HUMAN]	5.71	1	1	1	175	19.5563	9.62744	0.953146	0.835481	0.882099	0.890242	1.14321	0.983879	1.02782	1.05164	0.84653	0.0510227
C9JZG1	Eukaryotic translation initiation factor 3 subunit B (Fragment) OS=Homo sapiens GN=EIF3B PE=1 SV=1 - [C9JZG1_HUMAN]	4.64	1	1	1	302	33.362	4.36084	1.03096	0.856628	1.5217	1.13643	0.548608	0.944091	1.04401	0.845571	1.34398	0.30939
P07477	Trypsin-1 OS=Homo sapiens GN=PRSS1 PE=1 SV=1 - [TRY1_HUMAN]	11.34	2	2	3	247	26.5411	6.50732	0.980154	1.04066	1.12275	1.04785	0.869376	0.805039	1.10814	0.927517	1.12974	0.299484
J3KS10	60S ribosomal protein L26 (Fragment) OS=Homo sapiens GN=RPL26 PE=4 SV=1 - [J3KS10_HUMAN]	17.46	1	1	3	63	7.31803	10.3452	0.984151	0.82332	0.870479	0.89265	0.949037	0.944772	1.06178	0.985196	0.906063	0.205064
F8VY02	Endoplasmic reticulum resident protein 29 OS=Homo sapiens GN=ERP29 PE=1 SV=1 - [F8VY02_HUMAN]	15.63	2	2	2	160	18.1044	8.00146	0.987026	0.948014	1.26058	1.06521	0.679722	1.0537	0.894756	0.876059	1.21591	0.265749
B7Z5E9	cDNA FLJ58043, highly similar to Estrogen-related receptor gamma OS=Homo sapiens PE=2 SV=1 - [B7Z5E9_HUMAN]	3.3	1	1	1	273	31.0593	6.65381	0.94336	1.07018	0.933392	0.982312	0.96335	1.08312	1.07618	1.04088	0.94373	0.374837
F5H0N4	Peptidylprolyl isomerase (Fragment) OS=Homo sapiens GN=FKBP2 PE=1 SV=1 - [F5H0N4_HUMAN]	6.86	1	1	1	102	11.2829	9.24658	1.00095	1.05185	1.18553	1.07945	0.62627	0.938961	0.809501	0.791577	1.36366	0.0533662
H3BRV9	Nuclear transport factor 2 (Fragment) OS=Homo sapiens GN=NUTF2 PE=1 SV=1 - [H3BRV9_HUMAN]	5.61	1	1	2	107	12.151	5.33838	0.976478	1.18064	1.10281	1.08664	0.706742	0.979992	1.02029	0.90234	1.20425	0.184458
I3V9V3	Dipeptidyl peptidase 1 isoform a preproprotein (Fragment) OS=Homo sapiens GN=CTSC PE=4 SV=1 - [I3V9V3_HUMAN]	14.55	1	1	1	55	6.17992	7.28369	1.00294	0.881034	1.00123	0.961734	0.965412	1.00925	0.943295	0.972651	0.988777	0.819336
Q5J908	HCCR-binding protein 2 OS=Homo sapiens PE=2 SV=1 - [Q5J908_HUMAN]	7.83	1	1	1	115	12.5784	4.90674	0.973546	0.908567	1.48385	1.12199	0.373125	1.15449	0.747059	0.758224	1.47976	0.277757
H0YJT7	A-kinase anchor protein 6 (Fragment) OS=Homo sapiens GN=AKAP6 PE=4 SV=1 - [H0YJT7_HUMAN]	5.93	1	1	1	118	13.8631	9.74463	1.02596	0.954156	0.817637	0.932584	0.931196	0.958373	1.172	1.02052	0.91383	0.418634
F5GYN4	Ubiquitin thioesterase OTUB1 OS=Homo sapiens GN=OTUB1 PE=1 SV=1 - [F5GYN4_HUMAN]	4.98	1	1	1	241	28.033	5.2876	0.984604	1.14178	1.25722	1.12787	0.442644	1.11793	0.877537	0.812703	1.3878	0.212751
E5RIR0	Fatty acid-binding protein, adipocyte OS=Homo sapiens GN=FABP4 PE=1 SV=1 - [E5RIR0_HUMAN]	30.77	1	1	1	39	4.57414	4.43701	0.862069	1.03651	1.14921	1.01593	1.08242	1.04176	1.17195	1.09871	0.924659	0.418907
B8ZZQ6	Prothymosin alpha OS=Homo sapiens GN=PTMA PE=1 SV=1 - [B8ZZQ6_HUMAN]	13.08	1	1	1	107	11.7518	3.81494	0.800909	0.531426	1.85578	1.06271	0.313773	1.14363	0.603485	0.686962	1.54696	0.470233
L0R599	Alternative protein CIRH1A OS=Homo sapiens GN=CIRH1A PE=4 SV=1 - [L0R599_HUMAN]	23.08	1	1	1	65	7.68968	9.42236	0.931214	1.3677	1.11173	1.13688	1.04997	0.707246	1.12487	0.960695	1.18339	0.384163
Q67AN3	MHC class II antigen (Fragment) OS=Homo sapiens GN=HLA-DPB1 PE=4 SV=1 - [Q67AN3_HUMAN]	14	1	1	1	50	6.03389	4.75439	0.639819	0.811296	0.91362	0.788245	0.798221	1.40151	1.06389	1.08787	0.724576	0.193597
A0A090N901	Similar to TSH receptor suppressor element-binding protein-1 TSEP-1 OS=Homo sapiens GN=LOC402321 PE=4 SV=1 - [A0A090N901_HUMAN]	9.68	1	1	1	186	19.7183	5.10986	1.01025	0.881931	0.982581	0.958254	1.10339	0.991262	0.995974	1.03021	0.930154	0.249738
U3KQQ1	Gamma-enolase (Fragment) OS=Homo sapiens GN=ENO2 PE=1 SV=1 - [U3KQQ1_HUMAN]	20.93	1	1	1	86	9.47483	4.84326	1.07043	0.880075	0.739128	0.896544	0.735709	1.26052	1.61726	1.2045	0.744331	0.323042
A0A0J9YX35	Immunoglobulin heavy variable 3-64D OS=Homo sapiens GN=IGHV3-64D PE=3 SV=1 - [HV64D_HUMAN]	9.4	1	1	1	117	12.8143	7.85498	0.859931	2.08884	0.678115	1.20896	1.13043	1.10334	1.21102	1.14826	1.05286	0.897919
A0A0G2JJQ0	Proteasome subunit beta type-9 (Fragment) OS=Homo sapiens GN=PSMB9 PE=1 SV=1 - [A0A0G2JJQ0_HUMAN]	7.63	1	1	1	131	13.8909	4.86865	0.799679	1.03418	1.09246	0.975438	0.802969	0.910701	0.743433	0.819034	1.19096	0.199924
A0A0F7T8I6	IGHV4-31 protein (Fragment) OS=Homo sapiens GN=IGHV4-31 PE=4 SV=1 - [A0A0F7T8I6_HUMAN]	15	1	2	2	100	10.8393	8.44092	0.95557	2.47109	0.447246	1.2913	1.10149	0.851499	1.9937	1.31556	0.98156	0.974007
A0A0J9YXL8	P protein (Fragment) OS=Homo sapiens GN=OCA2 PE=4 SV=1 - [A0A0J9YXL8_HUMAN]	1.38	1	1	1	724	81.0539	7.60596	0.881316	1.24923	0.976503	1.03568	0.793577	0.968831	0.998775	0.920394	1.12526	0.416942
A0A0G2JMI3	Immunoglobulin heavy variable 1-69-2 OS=Homo sapiens GN=IGHV1-69-2 PE=3 SV=2 - [HV692_HUMAN]	5.98	1	1	1	117	12.8622	4.84326	0.885684	1.01514	0.500838	0.800554	0.611294	0.40816	5.12052	2.04666	0.391152	0.465363
A0A0S2Z5F6	Proline-serine-threonine phosphatase interacting protein 2 isoform 1 (Fragment) OS=Homo sapiens GN=PSTPIP2 PE=2 SV=1 - [A0A0S2Z5F6_HUMAN]	4.17	1	1	1	312	36.4225	8.70459	1.08516	0.778226	1.28235	1.04858	0.403172	0.896715	0.847634	0.71584	1.46482	0.196349
A0A109PP82	MS-C2 light chain variable region (Fragment) OS=Homo sapiens PE=2 SV=1 - [A0A109PP82_HUMAN]	14.02	1	1	1	107	11.7168	8.49951	0.891369	1.97251	0.70396	1.18928	0.969913	0.847334	1.39581	1.07102	1.11042	0.796393
A0A120HF56	MS-A3 light chain variable region (Fragment) OS=Homo sapiens PE=2 SV=1 - [A0A120HF56_HUMAN]	16.98	1	1	1	106	11.4148	9.20264	0.964574	2.12816	0.600294	1.23101	1.06279	1.03351	1.35614	1.15081	1.06969	0.873358
A0A1B0GTE1	Uncharacterized protein (Fragment) OS=Homo sapiens GN=LOC100289279 PE=4 SV=1 - [A0A1B0GTE1_HUMAN]	2.03	1	1	1	492	54.6149	9.15869	0.992401	0.926579	1.16125	1.02674	0.969793	0.951565	1.11901	1.01346	1.01311	0.886963
A0A193CHR8	10E8 light chain variable region (Fragment) OS=Homo sapiens PE=2 SV=1 - [A0A193CHR8_HUMAN]	8.26	1	1	1	109	11.5558	9.20264	0.692852	2.94875	0.493982	1.37853	1.33107	0.820975	1.84284	1.33163	1.03522	0.958186
A0A1L2BU38	Anti-staphylococcal enterotoxin E heavy chain variable region (Fragment) OS=Homo sapiens PE=2 SV=1 - [A0A1L2BU38_HUMAN]	7.2	1	1	1	125	13.5927	8.85107	1.53872	1.48372	0.508186	1.17688	1.42838	1.32597	1.04039	1.26491	0.930401	0.815989
A0A1W6IYI3	N90-VRC38.01 heavy chain variable region (Fragment) OS=Homo sapiens PE=2 SV=1 - [A0A1W6IYI3_HUMAN]	8.06	1	1	1	124	13.5016	7.28369	0.809234	1.88234	0.772872	1.15482	1.24537	0.906729	1.53443	1.22884	0.939759	0.864393
A0A1W6IYI5	N90-VRC38.08 heavy chain variable region (Fragment) OS=Homo sapiens PE=2 SV=1 - [A0A1W6IYI5_HUMAN]	24.19	2	2	3	124	13.5106	6.771	1.00847	1.93038	0.618311	1.18572	1.36339	0.96644	1.61628	1.31537	0.901435	0.779301
A0A1W2PS52	Cystatin-B OS=Homo sapiens GN=CSTB PE=1 SV=1 - [A0A1W2PS52_HUMAN]	14.46	2	2	2	83	9.01258	9.29053	1.19219	0.890784	0.836339	0.973105	0.825563	1.01218	1.37545	1.07107	0.908539	0.643021
