# Supplementary material for: Proteomic profiling analysis of postmenopausal osteoporosis and osteopenia identifies potential proteins associated with low bone mineral density
Source: PeerJ. 2020 Apr 14;8:e9009. doi: 10.7717/peerj.9009 (PMC7164430; doi:10.7717/peerj.9009)
Supplement: Supplemental Information 3 — The red filled columes represent up-regulation DAPs, and green filled columes represent down-regulation DAPs [file peerj-08-9009-s003.xlsx]

## Sheet: OP versus NC
Protein quantification and differential analysis in samples between OP and NC groups
The red filled columes represent up-regulation DAPs, and green filled columes represent down-regulation DAPs
Accession	Description	Coverage	Unique Peptides	Peptides	PSMs	AAs	MW [kDa]	calc. pI	OP-1/REF	OP-2/REF	OP-3/REF	average OP	NC-1/REF	NC-2/REF	NC-3/REF	average NC	OP/NC	t test p value
Q53H26	Transferrin variant (Fragment) OS=Homo sapiens PE=2 SV=1 - [Q53H26_HUMAN]	68.48	1	52	1078	698	77.0296	7.03467	0.626655	1.65456	1.914	1.3984	0.289157	0.277149	0.320514	0.295607	4.73062	0.0486109
Q86TY5	Galectin OS=Homo sapiens PE=2 SV=1 - [Q86TY5_HUMAN]	5.79	1	1	1	121	13.8882	9.15869	2.06703	1.56074	1.58146	1.73641	0.819581	0.361147	0.339272	0.506667	3.42712	0.00569629
Q14191	Werner syndrome ATP-dependent helicase OS=Homo sapiens GN=WRN PE=1 SV=2 - [WRN_HUMAN]	0.84	1	1	1	1432	162.357	6.34131	1.18897	1.56244	2.07214	1.60785	0.398389	0.650625	0.560002	0.536339	2.99783	0.0158309
C9JVG0	Serotransferrin (Fragment) OS=Homo sapiens GN=TF PE=1 SV=1 - [C9JVG0_HUMAN]	56.72	1	9	129	134	14.681	7.13721	0.61376	1.27312	1.4641	1.11699	0.435248	0.388492	0.353867	0.392535	2.84558	0.0487726
P02776	Platelet factor 4 OS=Homo sapiens GN=PF4 PE=1 SV=2 - [PLF4_HUMAN]	43.56	2	5	24	101	10.8379	8.6167	1.0012	1.88486	1.60845	1.49817	0.437773	0.728406	0.602655	0.589612	2.54095	0.0295631
Q13103	Secreted phosphoprotein 24 OS=Homo sapiens GN=SPP2 PE=1 SV=1 - [SPP24_HUMAN]	9.95	2	2	6	211	24.3218	8.32373	1.99573	1.13359	1.46785	1.53239	0.651912	0.630306	0.564396	0.615538	2.48951	0.0220931
B4E1B2	cDNA FLJ53691, highly similar to Serotransferrin OS=Homo sapiens PE=2 SV=1 - [B4E1B2_HUMAN]	73.3	3	53	1085	678	74.7834	7.12256	0.664297	1.0273	0.761233	0.817609	0.399848	0.364032	0.342521	0.3688	2.21694	0.015003
Q9C0D2	Centrosomal protein of 295 kDa OS=Homo sapiens GN=CEP295 PE=1 SV=4 - [CE295_HUMAN]	0.38	1	1	1	2601	294.996	5.99854	0.717878	1.22817	1.39449	1.11351	0.504823	0.423379	0.596109	0.508104	2.19151	0.0446253
B2R5J8	C-C motif chemokine OS=Homo sapiens PE=2 SV=1 - [B2R5J8_HUMAN]	39.56	4	4	4	91	10.0111	9.0708	1.29767	1.4211	1.3755	1.36476	0.522852	0.678786	0.695422	0.632353	2.15822	0.000368973
P10720	Platelet factor 4 variant OS=Homo sapiens GN=PF4V1 PE=1 SV=1 - [PF4V_HUMAN]	45.19	1	4	19	104	11.5453	9.1001	1.04183	1.56352	1.48562	1.36366	0.552047	0.811227	0.546459	0.636577	2.14217	0.0169372
B7Z1F8	cDNA FLJ53025, highly similar to Complement C4-B OS=Homo sapiens PE=2 SV=1 - [B7Z1F8_HUMAN]	71.11	2	18	516	270	30.4248	7.98682	1.38635	1.43762	1.70883	1.51093	0.825488	0.779346	0.755486	0.786773	1.92042	0.00208939
P05452	Tetranectin OS=Homo sapiens GN=CLEC3B PE=1 SV=3 - [TETN_HUMAN]	72.77	2	12	117	202	22.5223	5.66846	1.17889	1.28585	1.14194	1.20222	0.438812	0.574687	0.883371	0.63229	1.90138	0.0146441
Q14554	Protein disulfide-isomerase A5 OS=Homo sapiens GN=PDIA5 PE=1 SV=1 - [PDIA5_HUMAN]	4.24	2	2	2	519	59.5561	7.91357	0.927455	1.27891	1.44451	1.21696	0.554343	0.837367	0.69898	0.696897	1.74625	0.0396728
C9JBE7	WD repeat-containing protein 53 OS=Homo sapiens GN=WDR53 PE=1 SV=1 - [C9JBE7_HUMAN]	4.02	1	1	1	199	21.9611	7.40088	0.687761	1.11453	0.924564	0.90895	0.6063	0.506147	0.524916	0.545787	1.66539	0.0461727
P80723	Brain acid soluble protein 1 OS=Homo sapiens GN=BASP1 PE=1 SV=2 - [BASP1_HUMAN]	11.89	2	2	4	227	22.68	4.62744	1.20982	1.24575	1.21068	1.22209	0.710381	0.851478	0.695614	0.752491	1.62406	0.000776854
I3L3H7	Collagen alpha-1(I) chain (Fragment) OS=Homo sapiens GN=COL1A1 PE=1 SV=1 - [I3L3H7_HUMAN]	7.79	1	1	1	154	16.35	5.69385	1.47915	1.24196	1.28695	1.33602	0.791276	0.889524	0.855271	0.845357	1.58042	0.00329711
D3DSP9	Fibrinogen-like 1, isoform CRA_d OS=Homo sapiens GN=FGL1 PE=4 SV=1 - [D3DSP9_HUMAN]	3.56	1	1	1	253	29.4179	5.80811	1.45946	1.05961	1.41159	1.31022	0.800341	0.823617	0.993504	0.872488	1.5017	0.0352965
Q07507	Dermatopontin OS=Homo sapiens GN=DPT PE=1 SV=2 - [DERM_HUMAN]	5.47	1	1	1	201	23.9888	4.81787	1.21392	1.16756	1.18894	1.19014	0.658713	0.867111	0.880239	0.802021	1.48393	0.00601724
B4DE30	cDNA FLJ51711, highly similar to T-complex protein 1 subunit epsilon OS=Homo sapiens PE=2 SV=1 - [B4DE30_HUMAN]	1.72	1	1	1	466	51.5117	5.52881	1.09915	1.05321	1.36307	1.17181	0.685823	0.854407	0.897697	0.812642	1.44198	0.0365232
H0Y512	Adipocyte plasma membrane-associated protein (Fragment) OS=Homo sapiens GN=APMAP PE=1 SV=1 - [H0Y512_HUMAN]	1.71	1	1	1	409	45.3761	5.65576	0.982495	0.933292	1.12456	1.01345	0.770421	0.74878	0.636894	0.718698	1.41012	0.0140503
B7Z4J0	cDNA FLJ55790, highly similar to CLIP-associating protein 1 OS=Homo sapiens PE=2 SV=1 - [B7Z4J0_HUMAN]	2.73	1	1	1	440	48.487	6.72705	1.30127	1.04393	1.2703	1.20517	0.758947	0.939482	0.960473	0.886301	1.35977	0.0366884
P27169	Serum paraoxonase/arylesterase 1 OS=Homo sapiens GN=PON1 PE=1 SV=3 - [PON1_HUMAN]	47.32	12	14	173	355	39.7062	5.22412	1.26634	1.16132	1.03368	1.15378	0.922866	0.800567	0.833821	0.852418	1.35354	0.0169957
G8JLD5	Dynamin-1-like protein OS=Homo sapiens GN=DNM1L PE=1 SV=1 - [G8JLD5_HUMAN]	8.43	6	6	6	712	79.572	7.07861	1.05814	1.12604	1.13805	1.10741	0.694625	0.918478	0.938481	0.850528	1.30203	0.0351297
Q5VZR0	Golgi-associated plant pathogenesis-related protein 1 OS=Homo sapiens GN=GLIPR2 PE=1 SV=1 - [Q5VZR0_HUMAN]	26.56	3	3	5	128	14.2041	9.51025	1.13869	1.18294	1.06818	1.12993	0.937119	0.914773	0.790558	0.880817	1.28283	0.0116249
P20618	Proteasome subunit beta type-1 OS=Homo sapiens GN=PSMB1 PE=1 SV=2 - [PSB1_HUMAN]	7.47	2	2	2	241	26.4724	8.1333	1.01142	1.10847	1.04138	1.05375	0.70673	0.913347	0.865781	0.82862	1.2717	0.0306481
P10909	Clusterin OS=Homo sapiens GN=CLU PE=1 SV=1 - [CLUS_HUMAN]	40.09	20	20	406	449	52.461	6.26514	1.28763	1.10703	1.10914	1.16793	1.01279	0.887678	0.856793	0.919086	1.27076	0.0313237
B4E367	cDNA FLJ61564, highly similar to Plexin domain-containing protein 2 OS=Homo sapiens PE=2 SV=1 - [B4E367_HUMAN]	11.26	6	6	8	515	58.1468	6.3667	1.23207	1.07438	1.07114	1.12587	1.00798	0.845533	0.867111	0.906874	1.24148	0.0409012
A0A024R592	Glucosidase, alpha neutral AB, isoform CRA_b OS=Homo sapiens GN=GANAB PE=3 SV=1 - [A0A024R592_HUMAN]	6.38	5	5	5	847	96.1289	5.8335	1.03635	1.05896	1.17692	1.09074	0.778699	0.921681	0.939844	0.880075	1.23938	0.0347852
Q9P1C5	PRO2769 OS=Homo sapiens PE=2 SV=1 - [Q9P1C5_HUMAN]	26.11	1	9	373	494	55.3328	6.37939	1.00772	1.22062	1.18461	1.13765	0.924464	0.958635	0.87799	0.920363	1.23609	0.0357954
Q15166	Serum paraoxonase/lactonase 3 OS=Homo sapiens GN=PON3 PE=1 SV=3 - [PON3_HUMAN]	10.17	2	4	23	354	39.5823	5.41455	1.10279	1.05836	1.08579	1.08231	0.964014	0.825027	0.88092	0.889987	1.2161	0.0105306
Q71UM7	Beta-subunit signal transducing proteins GS/GI (Fragment) OS=Homo sapiens PE=2 SV=1 - [Q71UM7_HUMAN]	7.87	1	1	1	127	13.8604	4.90674	1.09316	1.00466	1.20697	1.1016	0.869702	0.927667	0.943838	0.913736	1.2056	0.0401499
E7EQR4	Ezrin OS=Homo sapiens GN=EZR PE=1 SV=3 - [E7EQR4_HUMAN]	14.68	2	11	26	586	69.3287	6.16357	1.11923	1.06403	1.13442	1.10589	0.855391	0.984715	0.913307	0.917804	1.20493	0.0120088
A1L4H1	Soluble scavenger receptor cysteine-rich domain-containing protein SSC5D OS=Homo sapiens GN=SSC5D PE=1 SV=3 - [SRCRL_HUMAN]	2.99	3	3	3	1573	165.639	6.12549	1.02715	0.86832	0.915959	0.937144	1.16549	1.15057	1.0665	1.12752	0.831154	0.0276687
B5A952	Soluble TIE1 variant 5 OS=Homo sapiens GN=TIE PE=2 SV=1 - [B5A952_HUMAN]	1.2	1	1	1	751	81.1576	7.40088	0.870098	0.968416	0.828348	0.888954	1.09863	1.02249	1.09398	1.0717	0.829482	0.0193519
U5LGU2	Apolipoprotein L1 (Fragment) OS=Homo sapiens GN=APOL1 PE=4 SV=1 - [U5LGU2_HUMAN]	42.66	14	14	38	293	32.6752	7.15186	0.784471	0.812517	0.755481	0.784156	0.992385	1.00748	0.896621	0.965495	0.812181	0.00917135
P58166	Inhibin beta E chain OS=Homo sapiens GN=INHBE PE=1 SV=1 - [INHBE_HUMAN]	3.43	1	1	1	350	38.537	9.24658	0.983855	0.859116	0.891932	0.911634	1.09248	1.15112	1.15598	1.13319	0.804482	0.00648255
A8MXK9	Uncharacterized protein ENSP00000382033 OS=Homo sapiens PE=2 SV=2 - [YQ018_HUMAN]	9.64	1	1	5	166	17.9959	6.52197	0.94181	0.770296	0.85652	0.856209	1.03545	1.05341	1.11237	1.06708	0.802388	0.0182158
A0A1C9J6R2	B cell receptor heavy chain variable region (Fragment) OS=Homo sapiens PE=4 SV=1 - [A0A1C9J6R2_HUMAN]	22.73	2	2	6	132	14.5152	8.83643	0.951173	0.834708	0.791648	0.859176	1.09382	1.01546	1.11422	1.0745	0.799606	0.0187701
B7Z7F6	cDNA FLJ51136, weakly similar to Aquaporin-7 OS=Homo sapiens PE=2 SV=1 - [B7Z7F6_HUMAN]	5.67	1	1	1	141	15.4289	9.65674	0.86865	0.915857	0.860607	0.881705	1.06749	1.21788	1.02656	1.10398	0.798663	0.0215028
B1B5R8	N-acylsphingosine amidohydrolase 1 (Fragment) OS=Homo sapiens GN=ASAH1 PE=4 SV=1 - [B1B5R8_HUMAN]	9.2	1	1	1	174	19.6322	7.43018	1.00667	0.736856	0.925135	0.889555	1.13129	1.1129	1.14076	1.12832	0.78839	0.0410257
A0N5G5	Rheumatoid factor D5 light chain (Fragment) OS=Homo sapiens GN=V-kappa-3 PE=2 SV=1 - [A0N5G5_HUMAN]	35.59	1	4	27	118	12.7585	8.96826	0.911189	0.859407	0.817844	0.862813	1.1398	1.08642	1.12391	1.11671	0.772637	0.00125508
Q2TBD1	NEBL protein OS=Homo sapiens GN=NEBL PE=2 SV=1 - [Q2TBD1_HUMAN]	1.12	1	1	3	716	82.5371	8.39697	0.89175	0.823381	0.85874	0.857957	1.3875	1.02893	1.15774	1.19139	0.720131	0.035369
Q53TG4	Uncharacterized protein NCK2 (Fragment) OS=Homo sapiens GN=NCK2 PE=4 SV=1 - [Q53TG4_HUMAN]	2.63	1	1	1	304	33.9428	6.3667	0.995827	0.737747	0.857851	0.863808	1.09704	1.35568	1.1488	1.20051	0.719535	0.0362457
Q59EJ0	Aldehyde dehydrogenase 1A1 variant (Fragment) OS=Homo sapiens PE=2 SV=1 - [Q59EJ0_HUMAN]	5.76	2	2	2	330	35.7572	6.23975	0.897543	0.890365	0.702531	0.830146	1.13574	1.21349	1.19105	1.18009	0.703459	0.00672424
C9IZP8	Complement C1s subcomponent (Fragment) OS=Homo sapiens GN=C1S PE=1 SV=1 - [C9IZP8_HUMAN]	16.5	1	1	14	103	11.8006	4.1958	0.874867	0.816354	0.658844	0.783355	1.22776	1.10192	1.12057	1.15008	0.681129	0.00829105
P61626	Lysozyme C OS=Homo sapiens GN=LYZ PE=1 SV=1 - [LYSC_HUMAN]	28.38	5	5	23	148	16.5263	9.15869	0.82275	0.87473	0.763229	0.820236	1.21042	1.3651	1.17166	1.24906	0.656683	0.00311076
M0R261	6-phosphogluconolactonase (Fragment) OS=Homo sapiens GN=PGLS PE=1 SV=1 - [M0R261_HUMAN]	6.94	1	1	1	216	22.9821	5.85889	0.696086	0.749149	0.779324	0.74152	0.926952	1.22805	1.25209	1.1357	0.652921	0.0213846
Q658S4	Uncharacterized protein DKFZp666N164 (Fragment) OS=Homo sapiens GN=DKFZp666N164 PE=2 SV=1 - [Q658S4_HUMAN]	6.56	1	1	1	122	13.4158	8.88037	0.940931	0.658526	0.965665	0.855041	1.32652	1.16385	1.5588	1.34972	0.633493	0.0306929
B6EDE2	Epididymis luminal protein 180 (Fragment) OS=Homo sapiens GN=HEL180 PE=2 SV=1 - [B6EDE2_HUMAN]	17.89	1	2	2	123	13.2795	5.45264	0.729431	0.674731	0.604273	0.669478	1.04502	0.889848	1.29141	1.07543	0.622523	0.0294713
Q9NPP6	Immunoglobulin heavy chain variant (Fragment) OS=Homo sapiens PE=2 SV=1 - [Q9NPP6_HUMAN]	54.33	1	14	341	416	44.758	6.12549	0.713587	0.733578	0.775059	0.740741	1.17849	1	1.39599	1.19149	0.621692	0.0177135
Q9UL78	Myosin-reactive immunoglobulin light chain variable region (Fragment) OS=Homo sapiens PE=1 SV=1 - [Q9UL78_HUMAN]	39.45	1	3	31	109	11.6388	8.29443	0.903319	0.613261	0.647457	0.721346	1.16426	1.05334	1.29642	1.17134	0.61583	0.0175405
A0A0J9YX35	Immunoglobulin heavy variable 3-64D OS=Homo sapiens GN=IGHV3-64D PE=3 SV=1 - [HV64D_HUMAN]	9.4	1	1	1	117	12.8143	7.85498	0.781045	0.806192	0.508998	0.698745	1.13043	1.10334	1.21102	1.14826	0.608524	0.011049
Q9UL86	Myosin-reactive immunoglobulin kappa chain variable region (Fragment) OS=Homo sapiens PE=2 SV=1 - [Q9UL86_HUMAN]	8.26	1	1	2	109	11.921	7.95752	0.80843	0.834823	0.584161	0.742471	1.14523	1.12922	1.39543	1.2233	0.606943	0.0148522
Q9UL85	Myosin-reactive immunoglobulin kappa chain variable region (Fragment) OS=Homo sapiens PE=2 SV=1 - [Q9UL85_HUMAN]	31.19	2	3	15	109	11.7539	8.51416	0.800273	0.747551	0.558883	0.702236	1.10633	1.03225	1.44245	1.19368	0.588296	0.0281108
A0N5G7	Rheumatoid factor D5 heavy chain (Fragment) OS=Homo sapiens GN=VH3 PE=2 SV=1 - [A0N5G7_HUMAN]	9.24	1	1	1	119	12.9784	8.93896	0.835613	0.648852	0.710482	0.731649	1.07648	1.20564	1.45679	1.2463	0.587055	0.0144255
A0A120HF56	MS-A3 light chain variable region (Fragment) OS=Homo sapiens PE=2 SV=1 - [A0A120HF56_HUMAN]	16.98	1	1	1	106	11.4148	9.20264	0.823686	0.759212	0.442565	0.675154	1.06279	1.03351	1.35614	1.15081	0.586676	0.0384039
Q9UL84	Myosin-reactive immunoglobulin heavy chain variable region (Fragment) OS=Homo sapiens PE=2 SV=1 - [Q9UL84_HUMAN]	14.75	1	2	9	122	13.5706	8.45557	0.67446	0.6171	0.65989	0.650483	1.08725	0.948674	1.30127	1.1124	0.584756	0.0113189
A0A1W6IYI3	N90-VRC38.01 heavy chain variable region (Fragment) OS=Homo sapiens PE=2 SV=1 - [A0A1W6IYI3_HUMAN]	8.06	1	1	1	124	13.5016	7.28369	0.708085	0.741157	0.694024	0.714422	1.24537	0.906729	1.53443	1.22884	0.581378	0.0474593
Q8NF20	FLJ00382 protein (Fragment) OS=Homo sapiens GN=FLJ00382 PE=2 SV=1 - [Q8NF20_HUMAN]	24.07	1	8	35	482	52.8916	8.66064	0.622118	0.352165	0.346371	0.440218	0.647248	0.917791	0.798182	0.787741	0.558836	0.0443005
V9HW68	Epididymis luminal protein 214 OS=Homo sapiens GN=HEL-214 PE=2 SV=1 - [V9HW68_HUMAN]	34.04	1	14	178	470	51.6828	7.75244	0.705874	0.552418	0.75874	0.672344	1.24189	0.96831	1.4017	1.20397	0.558439	0.0195328
P0DOX3	Immunoglobulin delta heavy chain OS=Homo sapiens PE=1 SV=1 - [IGD_HUMAN]	22.85	1	8	33	512	56.1891	8.01611	0.785477	0.547034	0.635107	0.655873	1.20167	1.10771	1.22112	1.17684	0.557318	0.00260253
C9JEE0	Immunoglobulin lambda-like polypeptide 1 (Fragment) OS=Homo sapiens GN=IGLL1 PE=1 SV=1 - [C9JEE0_HUMAN]	3.89	1	1	2	180	19.2149	10.6821	0.76995	0.593437	0.675798	0.679729	1.23139	1.05342	1.39368	1.22616	0.554354	0.00783866
O43866	CD5 antigen-like OS=Homo sapiens GN=CD5L PE=1 SV=1 - [CD5L_HUMAN]	58.79	19	19	104	347	38.0629	5.46533	0.753207	0.674537	0.589649	0.672464	1.16966	1.26465	1.21357	1.21596	0.553031	0.000573051
A2N0U2	VH6DJ protein (Fragment) OS=Homo sapiens GN=VH6DJ PE=2 SV=1 - [A2N0U2_HUMAN]	14.04	2	3	15	114	12.543	8.47021	0.750929	0.628859	0.560168	0.646652	1.20421	1.13597	1.17371	1.1713	0.552082	0.00089363
A0A0X9UWM4	IBM-A3 heavy chain variable region (Fragment) OS=Homo sapiens PE=2 SV=1 - [A0A0X9UWM4_HUMAN]	9.45	1	1	1	127	14.3599	8.36768	0.72439	0.546017	0.450675	0.573694	0.868817	1.15491	1.22686	1.08353	0.529468	0.0197847
Q86XI8	Uncharacterized protein ZSWIM9 OS=Homo sapiens GN=ZSWIM9 PE=1 SV=2 - [ZSWM9_HUMAN]	1.59	1	1	1	627	70.029	8.57275	0.716887	0.562414	0.637306	0.638869	1.12995	0.97992	1.53442	1.21476	0.525921	0.028355
P20851	C4b-binding protein beta chain OS=Homo sapiens GN=C4BPB PE=1 SV=1 - [C4BPB_HUMAN]	44.84	10	10	64	252	28.3384	5.13525	0.780302	0.645523	0.675793	0.700539	1.47534	1.24635	1.342	1.35456	0.517171	0.00110404
Q6MZU6	Uncharacterized protein DKFZp686C15213 OS=Homo sapiens GN=DKFZp686C15213 PE=2 SV=1 - [Q6MZU6_HUMAN]	18.1	2	8	120	464	51.0662	7.7085	0.68042	0.612955	0.484581	0.592652	1.23641	1.0311	1.25442	1.17398	0.504825	0.00318508
P0C0L4	Complement C4-A OS=Homo sapiens GN=C4A PE=1 SV=2 - [CO4A_HUMAN]	64.11	1	88	2810	1744	192.664	7.07861	1.02276	0.612428	0.657642	0.764278	1.30742	1.81235	1.43294	1.51757	0.503619	0.0195928
A2J422	Anti-HER3 scFv (Fragment) OS=Homo sapiens PE=2 SV=1 - [A2J422_HUMAN]	8.2	1	2	14	244	26.0085	8.39697	0.686063	0.520038	0.522061	0.576054	0.987241	1.19809	1.30524	1.16352	0.495094	0.0056198
A0A125U0U7	MS-C1 heavy chain variable region (Fragment) OS=Homo sapiens PE=2 SV=1 - [A0A125U0U7_HUMAN]	22.88	2	2	17	118	13.0884	6.07471	0.705822	0.562913	0.590814	0.61985	1.30785	1.09118	1.37702	1.25868	0.492459	0.00270746
Q9UL89	Myosin-reactive immunoglobulin heavy chain variable region (Fragment) OS=Homo sapiens PE=2 SV=1 - [Q9UL89_HUMAN]	16.38	1	2	3	116	12.5973	9.1001	0.701111	0.558432	0.652857	0.637467	1.01446	1.28833	1.64118	1.31466	0.484892	0.0220153
A0A1W6IYI5	N90-VRC38.08 heavy chain variable region (Fragment) OS=Homo sapiens PE=2 SV=1 - [A0A1W6IYI5_HUMAN]	24.19	2	2	3	124	13.5106	6.771	0.7589	0.683621	0.469266	0.637263	1.36339	0.96644	1.61628	1.31537	0.484474	0.0311114
Q9UFH1	Uncharacterized protein DKFZp434J0650 (Fragment) OS=Homo sapiens GN=DKFZp434J0650 PE=2 SV=1 - [Q9UFH1_HUMAN]	6.6	1	1	1	106	12.0877	8.57275	0.521316	0.555722	0.597587	0.558209	1.1433	1.07012	1.24716	1.15353	0.483915	0.000440136
A2NU33	Lambda L-chain C region (Fragment) OS=Homo sapiens PE=4 SV=1 - [A2NU33_HUMAN]	21.7	1	2	2	106	11.5896	7.07861	0.742454	0.459578	0.536891	0.579641	1.09177	1.12755	1.40709	1.2088	0.479516	0.00854271
A2KBC6	Anti-FactorVIII scFv (Fragment) OS=Homo sapiens PE=2 SV=1 - [A2KBC6_HUMAN]	26.05	1	5	37	238	24.9542	8.41162	0.763684	0.517038	0.581291	0.620671	1.24733	1.135	1.53412	1.30548	0.475435	0.00807674
A0A0X9V9B3	MS-F1 light chain variable region (Fragment) OS=Homo sapiens PE=2 SV=1 - [A0A0X9V9B3_HUMAN]	11.61	1	1	3	112	12.1	5.96045	0.601922	0.504978	0.619856	0.575585	0.836988	1.20432	1.62161	1.22097	0.471415	0.0481788
Q5NV62	V3-4 protein (Fragment) OS=Homo sapiens GN=V3-4 PE=4 SV=1 - [Q5NV62_HUMAN]	9.09	1	1	2	99	10.3689	4.729	0.609155	0.536091	0.508537	0.551261	0.952765	1.10178	1.46398	1.17284	0.470021	0.0159018
Q6N089	Uncharacterized protein OS=Homo sapiens GN=DKFZp686P15220 PE=1 SV=1 - [Q6N089_HUMAN]	30.51	1	12	161	472	51.6918	7.92822	0.666646	0.544442	0.494108	0.568399	1.23235	0.982953	1.42644	1.21391	0.468236	0.00951204
A2J1M8	Rheumatoid factor RF-IP12 (Fragment) OS=Homo sapiens PE=2 SV=1 - [A2J1M8_HUMAN]	32.63	2	3	10	95	10.6781	7.98682	0.684997	0.458493	0.48404	0.54251	1.02682	0.983885	1.48313	1.16461	0.465829	0.0237218
Q6P5S8	IGK@ protein OS=Homo sapiens GN=IGK@ PE=1 SV=1 - [Q6P5S8_HUMAN]	46.61	1	7	287	236	25.7568	6.32861	0.673866	0.686184	0.419707	0.593252	1.05916	1.18098	1.63379	1.29131	0.459419	0.023248
P01833	Polymeric immunoglobulin receptor OS=Homo sapiens GN=PIGR PE=1 SV=4 - [PIGR_HUMAN]	6.81	5	5	5	764	83.2317	5.74463	0.659982	0.493226	0.569243	0.57415	1.22703	1.46541	1.09873	1.26372	0.454333	0.00424229
S6BGF5	IgG H chain OS=Homo sapiens PE=2 SV=1 - [S6BGF5_HUMAN]	14.58	1	3	14	240	25.5836	8.55811	0.611927	0.526122	0.593762	0.57727	1.16114	1.07566	1.58981	1.27554	0.45257	0.0123313
G1FM90	Anti-Influenza A hemagglutinin heavy chain variable region (Fragment) OS=Homo sapiens PE=2 SV=1 - [G1FM90_HUMAN]	22.48	2	3	8	129	14.5101	8.42627	0.767017	0.473435	0.472525	0.570993	1.2659	1.1757	1.40997	1.28386	0.444748	0.00395564
A0A109PSY4	MS-A1 light chain variable region (Fragment) OS=Homo sapiens PE=2 SV=1 - [A0A109PSY4_HUMAN]	32.08	2	2	3	106	11.3687	8.48486	0.689169	0.577543	0.208915	0.491876	0.994437	1.26571	1.09701	1.11905	0.439548	0.0191825
O43234	Rheumatoid factor RF-ET13 (Fragment) OS=Homo sapiens PE=2 SV=1 - [O43234_HUMAN]	7.22	1	1	1	97	10.7414	9.20264	0.568842	0.391225	0.351546	0.437205	0.934935	0.900541	1.16727	1.00091	0.436805	0.0062496
Q5NV90	V2-17 protein (Fragment) OS=Homo sapiens GN=V2-17 PE=1 SV=1 - [Q5NV90_HUMAN]	41.24	3	3	20	97	10.3989	4.58936	0.6442	0.609045	0.481757	0.578334	1.3873	1.08322	1.53173	1.33409	0.433506	0.00585986
F8VYZ1	Melanocyte protein PMEL (Fragment) OS=Homo sapiens GN=PMEL PE=1 SV=1 - [F8VYZ1_HUMAN]	5.22	1	1	3	134	15.0327	8.47021	0.554564	0.530398	0.561744	0.548902	0.977463	1.194	1.70592	1.29246	0.424695	0.0263059
A2MYD6	V1-2 protein (Fragment) OS=Homo sapiens GN=V1-2 PE=4 SV=1 - [A2MYD6_HUMAN]	16.16	1	2	8	99	10.3468	5.90967	0.614925	0.522781	0.419064	0.518924	1.12692	1.16743	1.42574	1.24003	0.418477	0.00273988
S6C4R7	IgG L chain OS=Homo sapiens PE=2 SV=1 - [S6C4R7_HUMAN]	41.51	2	7	243	212	22.4992	8.23584	0.679612	0.588609	0.584602	0.617608	1.57217	1.26609	1.60637	1.48154	0.416868	0.00154835
P0DOX5	Immunoglobulin gamma-1 heavy chain OS=Homo sapiens PE=1 SV=1 - [IGG1_HUMAN]	29.84	1	11	157	449	49.2992	8.71924	0.624391	0.582225	0.411377	0.539331	1.34178	1.11729	1.45091	1.30333	0.41381	0.00291747
A0A1W6IYL0	N90-VRC38.07 light chain variable region (Fragment) OS=Homo sapiens PE=2 SV=1 - [A0A1W6IYL0_HUMAN]	18.58	1	2	16	113	12.3632	7.98682	0.570172	0.585905	0.351833	0.502637	1.09764	0.894884	1.6654	1.21931	0.412232	0.0418249
A0A0X9UWL5	GCT-A5 light chain variable region (Fragment) OS=Homo sapiens PE=2 SV=1 - [A0A0X9UWL5_HUMAN]	40.71	1	4	28	113	12.4601	6.58057	0.636766	0.48283	0.41145	0.510349	1.10195	1.01776	1.60461	1.24144	0.411094	0.0199258
S6BGD6	IgG L chain OS=Homo sapiens PE=1 SV=1 - [S6BGD6_HUMAN]	55.74	1	10	331	235	24.8081	7.23975	0.50011	0.55835	0.452056	0.503505	1.18652	1.22367	1.30087	1.23702	0.407031	8.72876e-05
A0A0C4DH35	Immunoglobulin heavy variable 3-35 (non-functional) (Fragment) OS=Homo sapiens GN=IGHV3-35 PE=1 SV=1 - [A0A0C4DH35_HUMAN]	9.4	1	1	2	117	12.8023	7.88428	0.679848	0.432821	0.459732	0.524134	0.957758	1.2003	1.74804	1.30203	0.40255	0.0343172
A2MYC8	V5-2 protein (Fragment) OS=Homo sapiens GN=V5-2 PE=4 SV=1 - [A2MYC8_HUMAN]	19.23	2	2	3	104	11.0344	7.28369	0.581482	0.678507	0.359629	0.539872	1.65235	1.20071	1.33612	1.39639	0.38662	0.00638031
Q6GMV8	Uncharacterized protein OS=Homo sapiens PE=2 SV=1 - [Q6GMV8_HUMAN]	53.85	2	10	330	234	24.8943	6.66846	0.524769	0.471896	0.398381	0.465015	0.966561	1.02575	1.62665	1.20632	0.385482	0.02573
A0A1L2BU38	Anti-staphylococcal enterotoxin E heavy chain variable region (Fragment) OS=Homo sapiens PE=2 SV=1 - [A0A1L2BU38_HUMAN]	7.2	1	1	1	125	13.5927	8.85107	0.586094	0.568789	0.294308	0.483064	1.42838	1.32597	1.04039	1.26491	0.381895	0.00641486
A2NB45	Cold agglutinin FS-1 L-chain (Fragment) OS=Homo sapiens PE=2 SV=1 - [A2NB45_HUMAN]	32.74	1	2	18	113	12.3802	8.48486	0.705772	0.529818	0.27491	0.5035	1.20998	1.1864	1.56001	1.3188	0.381788	0.00938653
A2J1N5	Rheumatoid factor RF-ET6 (Fragment) OS=Homo sapiens PE=2 SV=1 - [A2J1N5_HUMAN]	30.85	1	3	20	94	10.4432	9.12939	0.556046	0.522213	0.366091	0.48145	1.29179	1.10109	1.44649	1.27979	0.376195	0.00231782
Q6MZW0	Uncharacterized protein DKFZp686J11235 (Fragment) OS=Homo sapiens GN=DKFZp686J11235 PE=1 SV=1 - [Q6MZW0_HUMAN]	40.71	1	15	434	506	54.4249	6.771	0.526531	0.481904	0.466514	0.49165	1.29096	0.87198	1.77559	1.31284	0.374492	0.0349168
A0A0C4DH29	Immunoglobulin heavy variable 1-3 OS=Homo sapiens GN=IGHV1-3 PE=3 SV=1 - [HV103_HUMAN]	28.21	2	3	8	117	12.9994	9.5542	0.630342	0.428985	0.401404	0.48691	1.15605	0.980401	1.82757	1.32134	0.368497	0.0357641
A0A193CHQ9	10E8 heavy chain variable region (Fragment) OS=Homo sapiens PE=2 SV=1 - [A0A193CHQ9_HUMAN]	19.85	1	2	20	131	14.472	7.94287	0.568335	0.420165	0.40357	0.464023	1.13319	1.01588	1.68468	1.27792	0.363109	0.0186824
A0A120HG46	GCT-A10 heavy chain variable region (Fragment) OS=Homo sapiens PE=2 SV=1 - [A0A120HG46_HUMAN]	29.92	1	4	33	127	13.5858	8.80713	0.544785	0.401968	0.410784	0.452512	1.12683	1.11115	1.56	1.26599	0.357437	0.00618339
Q96SC2	Glutamate receptor 7 (Fragment) OS=Homo sapiens GN=GRIK3 PE=4 SV=1 - [Q96SC2_HUMAN]	15.66	1	1	1	83	9.33001	8.14795	0.600082	0.679282	0.20944	0.496268	1.5591	1.20008	1.42219	1.39379	0.356056	0.00741298
Q86TT1	Full-length cDNA clone CS0DD006YL02 of Neuroblastoma of Homo sapiens (human) OS=Homo sapiens PE=2 SV=1 - [Q86TT1_HUMAN]	68.8	1	20	245	375	41.2465	6.78564	0.456661	0.493476	0.461573	0.47057	1.36436	1.62128	1.05453	1.34672	0.349419	0.00594804
P00739	Haptoglobin-related protein OS=Homo sapiens GN=HPR PE=2 SV=2 - [HPTR_HUMAN]	50.57	5	17	409	348	39.0047	7.09326	0.475231	0.371784	0.291753	0.379589	1.07038	1.12252	1.08213	1.09168	0.347712	0.000211322
A2NYU7	Heavy chain Fab (Fragment) OS=Homo sapiens PE=2 SV=1 - [A2NYU7_HUMAN]	7.09	1	1	3	127	13.9831	9.24658	0.553337	0.394989	0.484214	0.477513	1.10572	1.23213	1.87174	1.40319	0.340305	0.0185662
Q5CZ94	Uncharacterized protein DKFZp781M0386 OS=Homo sapiens GN=DKFZp781M0386 PE=2 SV=1 - [Q5CZ94_HUMAN]	44.02	1	8	178	234	24.9863	7.26904	0.537092	0.439152	0.399203	0.458483	1.35008	1.18971	1.51122	1.35034	0.339532	0.000923422
A2NYU9	Heavy chain Fab (Fragment) OS=Homo sapiens PE=2 SV=1 - [A2NYU9_HUMAN]	13.93	2	2	5	122	13.5438	9.48096	0.592514	0.347559	0.448971	0.463015	1.68818	1.10229	1.33694	1.3758	0.336542	0.00777292
A0A193CHR8	10E8 light chain variable region (Fragment) OS=Homo sapiens PE=2 SV=1 - [A0A193CHR8_HUMAN]	8.26	1	1	1	109	11.5558	9.20264	0.57778	0.38409	0.379134	0.447001	1.33107	0.820975	1.84284	1.33163	0.33568	0.0429096
S6BGD4	IgG H chain OS=Homo sapiens PE=2 SV=1 - [S6BGD4_HUMAN]	17.09	1	3	31	234	24.9997	9.48096	0.635219	0.422355	0.342941	0.466838	1.08871	1.31104	1.78925	1.39633	0.334332	0.0143388
Q9UL72	Myosin-reactive immunoglobulin heavy chain variable region (Fragment) OS=Homo sapiens PE=2 SV=1 - [Q9UL72_HUMAN]	25.42	1	2	22	118	12.8642	6.58057	0.638672	0.286063	0.358363	0.427699	0.850227	1.20564	1.81813	1.29133	0.331208	0.0461347
A0A0A0MT36	Immunoglobulin kappa variable 6D-21 OS=Homo sapiens GN=IGKV6D-21 PE=3 SV=1 - [KVD21_HUMAN]	10.53	1	1	2	114	12.3322	7.28369	0.440463	0.447147	0.497202	0.461604	1.62228	0.936654	1.74984	1.43626	0.321393	0.0182976
Q5NV89	V1-7 protein (Fragment) OS=Homo sapiens GN=V1-7 PE=4 SV=1 - [Q5NV89_HUMAN]	16.16	2	2	2	99	10.2798	7.06396	0.500601	0.258103	0.322344	0.360349	0.949997	1.30187	1.11384	1.1219	0.321195	0.00365812
Q6MZQ6	Uncharacterized protein DKFZp686G11190 OS=Homo sapiens GN=DKFZp686G11190 PE=2 SV=1 - [Q6MZQ6_HUMAN]	30.32	1	12	161	475	52.01	8.06006	0.449793	0.3464	0.489546	0.428579	1.14097	1.01991	1.85104	1.33731	0.320479	0.0258433
P01871	Immunoglobulin heavy constant mu OS=Homo sapiens GN=IGHM PE=1 SV=4 - [IGHM_HUMAN]	64.02	3	24	287	453	49.4086	6.771	0.516515	0.386774	0.411644	0.438311	1.3047	1.39207	1.41249	1.36975	0.319992	5.58167e-05
Q7Z379	Uncharacterized protein DKFZp686K04218 (Fragment) OS=Homo sapiens GN=DKFZp686K04218 PE=2 SV=1 - [Q7Z379_HUMAN]	42.47	1	12	303	478	51.5877	6.52197	0.498036	0.485323	0.30631	0.42989	1.11708	1.20408	1.73696	1.35271	0.3178	0.010523
Q5NV82	V4-2 protein (Fragment) OS=Homo sapiens GN=V4-2 PE=4 SV=1 - [Q5NV82_HUMAN]	8.65	1	1	1	104	11.1354	7.97217	0.530193	0.42155	0.393447	0.448397	1.92146	0.941336	1.42485	1.42921	0.313737	0.0265498
Q5EBM2	Uncharacterized protein OS=Homo sapiens PE=1 SV=1 - [Q5EBM2_HUMAN]	49.13	8	17	316	519	56.7768	6.85889	0.479109	0.342584	0.332742	0.384812	1.05977	1.2617	1.35879	1.22676	0.313683	0.00108699
Q0ZCH9	Immunglobulin heavy chain variable region (Fragment) OS=Homo sapiens PE=4 SV=1 - [Q0ZCH9_HUMAN]	47.11	1	5	42	121	13.4275	8.45557	0.465424	0.405984	0.382229	0.417879	1.46607	1.10894	1.52007	1.36503	0.306132	0.00196041
A0A125QYY4	GCT-A7 heavy chain variable region (Fragment) OS=Homo sapiens PE=2 SV=1 - [A0A125QYY4_HUMAN]	26.89	1	3	6	119	13.1483	7.94287	0.5828	0.27155	0.351676	0.402009	1.06605	1.20517	1.6861	1.3191	0.304759	0.0119442
B4DLF7	cDNA FLJ60294 OS=Homo sapiens PE=2 SV=1 - [B4DLF7_HUMAN]	2.28	1	1	1	964	105.055	9.15869	0.222141	0.624265	0.403272	0.416559	1.74482	1.15679	1.30406	1.40189	0.297141	0.00959626
Q0ZCI2	Immunglobulin heavy chain variable region (Fragment) OS=Homo sapiens PE=4 SV=1 - [Q0ZCI2_HUMAN]	14.75	2	2	3	122	13.3157	9.1001	0.526741	0.38837	0.383957	0.433023	1.2152	1.01866	2.22782	1.48723	0.291161	0.0491966
P01591	Immunoglobulin J chain OS=Homo sapiens GN=JCHAIN PE=1 SV=4 - [IGJ_HUMAN]	59.12	6	6	37	159	18.087	5.23682	0.457833	0.398975	0.370767	0.409191	1.23606	1.44245	1.53831	1.40561	0.291113	0.000426252
Q5NV65	V1-5 protein (Fragment) OS=Homo sapiens GN=V1-5 PE=4 SV=1 - [Q5NV65_HUMAN]	13.13	1	1	1	99	10.3769	4.81787	0.468152	0.331278	0.1889	0.329443	0.912556	0.933513	1.57457	1.14021	0.288931	0.0249269
S6BAR0	IgG L chain OS=Homo sapiens PE=2 SV=1 - [S6BAR0_HUMAN]	43.98	2	8	286	216	23.1073	7.69385	0.455255	0.35347	0.302108	0.370278	1.36953	1.19308	1.28684	1.28315	0.288569	0.000178029
A0A0F7TAG7	IGHV3-72 protein (Fragment) OS=Homo sapiens GN=IGHV3-72 PE=4 SV=1 - [A0A0F7TAG7_HUMAN]	17.48	1	2	10	103	11.6685	8.41162	0.535368	0.3417	0.338762	0.405277	1.41971	0.938882	1.88646	1.41502	0.286411	0.0229399
F4MH92	Ubiquitously transcribed tetratricopeptide repeat protein Y-linked transcript variant 62 OS=Homo sapiens GN=UTY PE=2 SV=1 - [F4MH92_HUMAN]	1.17	1	1	1	1367	151.469	7.48877	0.64448	0.30394	0.24233	0.396917	1.50506	1.0229	1.66144	1.39647	0.284229	0.0120644
Q6GMX6	IGH@ protein OS=Homo sapiens GN=IGH@ PE=1 SV=1 - [Q6GMX6_HUMAN]	37.42	2	15	181	465	51.0507	8.68994	0.477509	0.284925	0.298734	0.353723	0.919047	1.09428	1.7414	1.25158	0.282622	0.0252449
Q9UL70	Myosin-reactive immunoglobulin light chain variable region (Fragment) OS=Homo sapiens PE=2 SV=1 - [Q9UL70_HUMAN]	23.15	1	2	24	108	11.6258	9.36377	0.526154	0.279024	0.332881	0.379353	1.17749	0.985809	1.88776	1.35035	0.280929	0.0269277
A2J1N0	Rheumatoid factor RF-IP14 (Fragment) OS=Homo sapiens PE=2 SV=1 - [A2J1N0_HUMAN]	18.75	1	2	15	96	10.4921	8.96826	0.48636	0.403539	0.278358	0.389419	1.49773	1.03159	1.72993	1.41975	0.274287	0.00856249
Q96K68	cDNA FLJ14473 fis, clone MAMMA1001080, highly similar to Homo sapiens SNC73 protein (SNC73) mRNA OS=Homo sapiens PE=2 SV=1 - [Q96K68_HUMAN]	44.74	1	16	432	494	53.0542	6.85889	0.451184	0.316423	0.331311	0.366306	0.950594	1.22891	1.84754	1.34235	0.272885	0.022052
Q6PCC8	URB2 protein (Fragment) OS=Homo sapiens GN=URB2 PE=2 SV=1 - [Q6PCC8_HUMAN]	0.63	1	1	1	957	107.247	7.91357	0.425335	0.269515	0.420174	0.371675	1.26272	1.45449	1.39153	1.36958	0.271379	0.000195646
Q5FWF9	IGL@ protein OS=Homo sapiens GN=IGL@ PE=1 SV=1 - [Q5FWF9_HUMAN]	51.29	3	10	319	232	24.7792	5.59229	0.465046	0.36233	0.349811	0.392396	1.24516	1.49442	1.63803	1.4592	0.268911	0.000896995
P01023	Alpha-2-macroglobulin OS=Homo sapiens GN=A2M PE=1 SV=3 - [A2MG_HUMAN]	61.74	61	72	3010	1474	163.188	6.45557	0.430825	0.354901	0.339693	0.37514	1.51846	1.32856	1.42704	1.42468	0.263314	6.98306e-05
A0A0X9T7Y9	IBM-A2 heavy chain variable region (Fragment) OS=Homo sapiens PE=2 SV=1 - [A0A0X9T7Y9_HUMAN]	6.4	1	1	2	125	13.817	9.29053	0.583429	0.235263	0.23232	0.350338	1.59091	0.933764	1.51527	1.34665	0.260155	0.0138634
O95978	VH1 protein (Fragment) OS=Homo sapiens GN=VH1 PE=4 SV=1 - [O95978_HUMAN]	12.1	1	2	4	157	17.2925	9.78857	0.494565	0.291125	0.357905	0.381198	1.36587	0.905224	2.12628	1.46579	0.260063	0.0397725
A0A125U0V2	GCT-A1 heavy chain variable region (Fragment) OS=Homo sapiens PE=2 SV=1 - [A0A125U0V2_HUMAN]	25.2	1	3	21	127	13.7089	8.77783	0.446704	0.346865	0.279233	0.357601	1.09338	1.14924	1.88782	1.37681	0.259731	0.0173774
Q9UL82	Myosin-reactive immunoglobulin light chain variable region (Fragment) OS=Homo sapiens PE=2 SV=1 - [Q9UL82_HUMAN]	16.82	2	2	9	107	11.4377	6.59521	0.440358	0.311181	0.327318	0.359619	1.64189	1.05643	1.63945	1.44592	0.248713	0.005469
Q5NV84	V1-3 protein (Fragment) OS=Homo sapiens GN=V1-3 PE=4 SV=1 - [Q5NV84_HUMAN]	16.16	1	2	5	99	10.4859	7.06396	0.425978	0.363108	0.283676	0.357587	1.07511	1.95769	1.29692	1.44324	0.247767	0.0155123
Q8NCL6	cDNA FLJ90170 fis, clone MAMMA1000370, highly similar to Ig alpha-1 chain C region OS=Homo sapiens PE=2 SV=1 - [Q8NCL6_HUMAN]	42.19	1	15	431	493	53.1903	6.52197	0.521919	0.302971	0.231287	0.352059	1.41904	0.98533	1.94201	1.44879	0.243002	0.0194171
Q6PIK1	IGL@ protein OS=Homo sapiens GN=IGL@ PE=1 SV=1 - [Q6PIK1_HUMAN]	50.21	1	10	191	235	24.8421	7.7085	0.449505	0.346155	0.280291	0.35865	1.17425	1.45051	1.96804	1.53093	0.234269	0.00787525
Q8NEJ1	Uncharacterized protein OS=Homo sapiens PE=2 SV=1 - [Q8NEJ1_HUMAN]	52.54	1	10	334	236	25.0083	7.69385	0.474266	0.258927	0.317693	0.350295	1.47001	1.17499	2.02342	1.55614	0.225105	0.00934438
A0A075B6R9	Immunoglobulin kappa variable 2D-24 (non-functional) (Fragment) OS=Homo sapiens GN=IGKV2D-24 PE=4 SV=1 - [A0A075B6R9_HUMAN]	10.83	1	1	2	120	13.0707	8.86572	0.431841	0.19219	0.402009	0.342013	1.2765	1.38009	1.96085	1.53915	0.22221	0.00609131
K7ELP7	Keratin, type I cytoskeletal 17 (Fragment) OS=Homo sapiens GN=KRT17 PE=1 SV=1 - [K7ELP7_HUMAN]	12.24	1	1	8	49	5.50775	4.58936	0.372209	0.283213	0.333604	0.329675	1.67132	1.36089	1.51674	1.51631	0.217419	0.00021963
P06312	Immunoglobulin kappa variable 4-1 OS=Homo sapiens GN=IGKV4-1 PE=1 SV=1 - [KV401_HUMAN]	27.27	1	3	12	121	13.3716	5.24951	0.338632	0.222233	0.259503	0.273456	1.26356	1.22282	1.52747	1.33795	0.204385	0.000466665
A6NHN0	Otolin-1 OS=Homo sapiens GN=OTOL1 PE=3 SV=1 - [OTOL1_HUMAN]	1.68	1	1	1	477	49.3906	8.33838	0.36561	0.297798	0.267783	0.310397	1.88441	0.987193	1.75746	1.54302	0.201162	0.011931
Q6N095	Uncharacterized protein OS=Homo sapiens GN=DKFZp686K03196 PE=1 SV=1 - [Q6N095_HUMAN]	27.58	1	11	159	475	52.3271	8.57275	0.356083	0.243959	0.228252	0.276098	1.23666	1.14052	1.90398	1.42705	0.193474	0.00911613
Q6N041	Uncharacterized protein DKFZp686O16217 (Fragment) OS=Homo sapiens GN=DKFZp686O16217 PE=2 SV=1 - [Q6N041_HUMAN]	34.74	1	12	247	498	54.0905	7.18115	0.552692	0.26971	0.114754	0.312385	1.54291	2.18744	1.20152	1.64396	0.19002	0.0135763
A0A0C4DH39	Immunoglobulin heavy variable 1-58 OS=Homo sapiens GN=IGHV1-58 PE=3 SV=1 - [HV158_HUMAN]	5.98	1	1	1	117	12.9965	9.24658	0.392044	0.183143	0.197948	0.257712	1.41357	0.960092	2.17964	1.51777	0.169797	0.0253764
Q96K23	cDNA FLJ14838 fis, clone OVARC1001726, weakly similar to APICAL-LIKE PROTEIN OS=Homo sapiens PE=2 SV=1 - [Q96K23_HUMAN]	2.33	1	1	1	258	27.9931	6.63916	0.31863	0.21703	0.220942	0.252201	1.81699	1.16186	1.49167	1.49017	0.169242	0.00297876
P0DOX7	Immunoglobulin kappa light chain OS=Homo sapiens PE=1 SV=1 - [IGK_HUMAN]	53.74	1	7	269	214	23.3644	7.1665	0.354317	0.135436	0.236849	0.242201	1.144	1.11416	2.32539	1.52785	0.158524	0.0334228
Q8IZD8	Anti-thyroglobulin light chain variable region (Fragment) OS=Homo sapiens PE=2 SV=1 - [Q8IZD8_HUMAN]	21.78	1	2	4	101	10.3681	5.90967	0.372372	0.0834027	0.177981	0.211252	1.59441	1.19379	1.75135	1.51318	0.139608	0.00221575
Q5NV92	V5-6 protein (Fragment) OS=Homo sapiens GN=V5-6 PE=4 SV=1 - [Q5NV92_HUMAN]	10.1	1	1	4	99	10.567	6.26514	0.301022	0.0921245	0.132018	0.175055	1.75566	1.06483	1.87367	1.56472	0.111876	0.0059268
P05155	Plasma protease C1 inhibitor OS=Homo sapiens GN=SERPING1 PE=1 SV=2 - [IC1_HUMAN]	31.6	17	17	325	500	55.1194	6.55127	1.10522	0.930254	0.965982	1.00049	1.1803	1.11885	1.19921	1.16612	0.857964	0.0475778
B4E1C4	cDNA FLJ51179, highly similar to Vitamin K-dependent protein C (EC 3.4.21.69) OS=Homo sapiens PE=2 SV=1 - [B4E1C4_HUMAN]	32.07	11	11	52	421	46.0296	7.92822	1.1365	1.05989	1.08283	1.09307	1.04426	0.914135	0.932347	0.963581	1.13439	0.0498363
Q6YHK3	CD109 antigen OS=Homo sapiens GN=CD109 PE=1 SV=2 - [CD109_HUMAN]	12.04	15	15	20	1445	161.587	5.84619	1.13264	1.0802	1.04901	1.08728	0.978778	0.990157	0.906286	0.958407	1.13447	0.0228644
A3RKG7	Coagulation factor VII (Fragment) OS=Homo sapiens PE=2 SV=1 - [A3RKG7_HUMAN]	35.53	6	6	12	273	30.1264	8.33838	1.01462	0.945849	0.913757	0.958075	1.16504	1.04486	1.09652	1.10214	0.869287	0.0346417
G3V0E5	Transferrin receptor (P90, CD71), isoform CRA_c OS=Homo sapiens GN=TFRC PE=1 SV=1 - [G3V0E5_HUMAN]	15.61	9	9	12	679	75.9166	6.81494	1.14203	1.0904	1.01057	1.081	0.943514	0.925073	0.884485	0.917691	1.17796	0.0177508
Q9BWP8	Collectin-11 OS=Homo sapiens GN=COLEC11 PE=1 SV=1 - [COL11_HUMAN]	12.92	3	3	6	271	28.647	5.41455	1.02962	1.19237	1.15244	1.12481	0.968313	0.985072	0.992727	0.982037	1.14539	0.0448112
Q12860	Contactin-1 OS=Homo sapiens GN=CNTN1 PE=1 SV=1 - [CNTN1_HUMAN]	12.48	12	12	14	1018	113.249	5.89697	1.08232	1.07248	1.01388	1.05623	0.996872	0.931345	0.955398	0.961205	1.09886	0.0295666
A0A0A7E7X3	Aminopeptidase (Fragment) OS=Homo sapiens GN=ERAP1 PE=2 SV=1 - [A0A0A7E7X3_HUMAN]	6.59	6	6	7	941	107.163	6.40479	1.05855	1.14638	1.08263	1.09585	0.83797	0.974479	0.928547	0.913665	1.1994	0.019052
Q7Z7M4	Superoxide dismutase (Fragment) OS=Homo sapiens GN=SOD2 PE=2 SV=1 - [Q7Z7M4_HUMAN]	23.94	4	4	6	213	23.658	7.31299	1.02161	0.969013	1.04179	1.0108	0.870249	0.957895	0.85616	0.894768	1.12968	0.0394426
P48637	Glutathione synthetase OS=Homo sapiens GN=GSS PE=1 SV=1 - [GSHB_HUMAN]	13.71	8	8	10	474	52.3523	5.92236	1.04651	1.00767	1.09385	1.04934	0.892324	0.996153	0.915029	0.934502	1.12289	0.0460028
P28066	Proteasome subunit alpha type-5 OS=Homo sapiens GN=PSMA5 PE=1 SV=3 - [PSA5_HUMAN]	13.28	4	4	5	241	26.3942	4.79248	1.03079	1.07124	1.08511	1.06238	0.805039	0.890992	0.99066	0.895564	1.18627	0.0409002
Q9Y646	Carboxypeptidase Q OS=Homo sapiens GN=CPQ PE=1 SV=1 - [CBPQ_HUMAN]	4.66	3	3	3	472	51.8545	6.17627	1.05918	1.03391	1.08556	1.05955	1	0.989001	0.930101	0.973034	1.08892	0.0303316
Q5HYG2	Uncharacterized protein DKFZp686H0286 OS=Homo sapiens GN=DKFZp686H0286 PE=2 SV=1 - [Q5HYG2_HUMAN]	15.28	1	1	1	72	8.42748	10.2573	1.12099	1.13613	1.08782	1.11498	1.01875	0.995636	0.90628	0.973554	1.14527	0.0189759
Q9NTU7	Cerebellin-4 OS=Homo sapiens GN=CBLN4 PE=1 SV=1 - [CBLN4_HUMAN]	5.97	1	1	2	201	21.7944	8.73389	0.984024	1.1602	1.0401	1.06144	0.879288	0.930367	0.901951	0.903869	1.17433	0.0433888
Q9NPR2	Semaphorin-4B OS=Homo sapiens GN=SEMA4B PE=1 SV=3 - [SEM4B_HUMAN]	3.85	3	3	3	832	92.1347	6.94678	0.97477	1.00006	0.848408	0.941078	1.0991	1.07361	1.09578	1.0895	0.863773	0.0355567
P49913	Cathelicidin antimicrobial peptide OS=Homo sapiens GN=CAMP PE=1 SV=1 - [CAMP_HUMAN]	14.71	3	3	3	170	19.2892	9.40771	0.863146	0.82913	0.790416	0.827564	1.08392	0.917061	0.971074	0.990684	0.835346	0.0379753
Q9BZ93	Prosomal P27K protein (Fragment) OS=Homo sapiens GN=PSMA6 PE=4 SV=1 - [Q9BZ93_HUMAN]	22.41	1	1	1	58	6.19626	8.96826	1.05057	1.11533	1.00194	1.05594	0.949419	0.928526	0.90731	0.928418	1.13736	0.021934
H6UYS7	Alpha-synuclein OS=Homo sapiens GN=SNCA PE=1 SV=1 - [H6UYS7_HUMAN]	16.33	1	1	3	98	10.0142	6.7417	1.09512	1.12457	1.10376	1.10781	0.934634	0.949743	1.06695	0.983776	1.12608	0.0439612
A7LNF5	Nucleobindin 2 (Fragment) OS=Homo sapiens GN=NUCB2 PE=2 SV=1 - [A7LNF5_HUMAN]	15.94	1	1	1	69	8.0212	4.83057	0.944692	0.889964	0.969671	0.934776	1.13119	1.04402	1.09673	1.09065	0.857085	0.0107706
F2Z2G5	WAP four-disulfide core domain protein 3 OS=Homo sapiens GN=WFDC3 PE=4 SV=1 - [F2Z2G5_HUMAN]	9.57	1	1	1	94	10.0289	5.94775	1.04452	1.08536	0.989203	1.03969	0.937637	0.942507	0.939972	0.940039	1.10601	0.023331
C0JYY2	Apolipoprotein B (Including Ag(X) antigen) OS=Homo sapiens GN=APOB PE=4 SV=1 - [C0JYY2_HUMAN]	66.4	134	278	4985	4563	515.236	7.04932	1.0249	0.992208	0.860131	0.959078	1.17836	0.894206	0.949837	1.00747	0.951969	0.655253
A0A0G2JPR0	Complement C4-A OS=Homo sapiens GN=C4A PE=1 SV=1 - [A0A0G2JPR0_HUMAN]	64.11	1	88	2831	1744	192.754	7.03467	1.74876	0.885911	0.257528	0.964068	2.06653	0.63531	0.903338	1.20173	0.802235	0.719398
P0C0L5	Complement C4-B OS=Homo sapiens GN=C4B PE=1 SV=2 - [CO4B_HUMAN]	64.11	1	88	2843	1744	192.631	7.26904	1.58011	0.44335	0.222972	0.748811	1.30741	1.03305	1.0447	1.12839	0.663612	0.427165
A0A024R462	Fibronectin 1, isoform CRA_n OS=Homo sapiens GN=FN1 PE=4 SV=1 - [A0A024R462_HUMAN]	57.32	57	96	1972	2355	259.049	5.73193	1.32201	1.01811	0.798484	1.0462	1.16743	0.854402	0.996138	1.00599	1.03997	0.831143
P08603	Complement factor H OS=Homo sapiens GN=CFH PE=1 SV=4 - [CFAH_HUMAN]	59.79	3	67	1836	1231	139.005	6.60986	1.10175	1.00743	1.13181	1.08033	1.1255	0.913414	1.00719	1.01537	1.06398	0.417334
A8K5T0	cDNA FLJ75416, highly similar to Homo sapiens complement factor H (CFH), mRNA OS=Homo sapiens PE=2 SV=1 - [A8K5T0_HUMAN]	57.92	1	65	1804	1231	138.859	6.7124	0.900235	1.24022	0.770551	0.970335	0.744405	1.56138	1.02593	1.11057	0.873725	0.639915
P01008	Antithrombin-III OS=Homo sapiens GN=SERPINC1 PE=1 SV=1 - [ANT3_HUMAN]	66.81	32	32	1214	464	52.5689	6.7124	1.15101	0.985485	1.00932	1.04861	1.06732	0.94673	0.969519	0.994523	1.05438	0.442627
P02774	Vitamin D-binding protein OS=Homo sapiens GN=GC PE=1 SV=1 - [VTDB_HUMAN]	84.39	32	42	1801	474	52.929	5.5415	1.15107	1.03202	0.994459	1.05918	1.12317	0.949594	0.956794	1.00985	1.04885	0.540346
Q59HB3	Apolipoprotein B variant (Fragment) OS=Homo sapiens PE=2 SV=1 - [Q59HB3_HUMAN]	61.98	1	90	1659	1615	183.465	6.80029	0.869032	1.08567	0.773151	0.909285	1.3058	0.873861	0.921627	1.03376	0.879587	0.492659
P02790	Hemopexin OS=Homo sapiens GN=HPX PE=1 SV=2 - [HEMO_HUMAN]	67.53	30	30	1529	462	51.6433	7.02002	1.11579	1.01446	0.995126	1.04179	1.14187	1.02477	0.986986	1.05121	0.991042	0.88247
P00450	Ceruloplasmin OS=Homo sapiens GN=CP PE=1 SV=1 - [CERU_HUMAN]	59.44	50	55	1915	1065	122.128	5.71924	1.105	0.999261	0.968699	1.02432	1.06831	0.992	1.06036	1.04022	0.984712	0.756409
P01011	Alpha-1-antichymotrypsin OS=Homo sapiens GN=SERPINA3 PE=1 SV=2 - [AACT_HUMAN]	48.7	19	19	1201	423	47.6205	5.51611	1.18091	0.956806	0.990603	1.04277	1.05261	0.941223	1.18664	1.06016	0.983601	0.869771
B7ZKJ8	ITIH4 protein OS=Homo sapiens GN=ITIH4 PE=1 SV=1 - [B7ZKJ8_HUMAN]	56.68	1	44	1316	935	103.816	6.88818	1.10079	0.771723	1.27793	1.05015	1.11972	1.10774	1.08023	1.10256	0.952458	0.742357
B2RMS9	Inter-alpha (Globulin) inhibitor H4 (Plasma Kallikrein-sensitive glycoprotein) OS=Homo sapiens GN=ITIH4 PE=2 SV=1 - [B2RMS9_HUMAN]	56.45	1	44	1317	930	103.298	6.97607	1.13959	0.704986	1.30311	1.04923	1.31995	1.00506	1.21324	1.17942	0.889616	0.552483
B7Z544	cDNA FLJ51742, highly similar to Inter-alpha-trypsin inhibitor heavy chain H4 OS=Homo sapiens PE=2 SV=1 - [B7Z544_HUMAN]	54.95	1	40	1258	888	98.2863	6.59521	1.20063	0.918308	1.21052	1.10982	1.05998	1.00127	0.993074	1.01811	1.09008	0.402727
A2RTY6	Inter-alpha (Globulin) inhibitor H2 OS=Homo sapiens GN=ITIH2 PE=2 SV=1 - [A2RTY6_HUMAN]	48.1	38	38	1290	946	106.37	6.85889	1.15019	1.03478	1.05706	1.08068	1.10984	0.925056	0.938436	0.991109	1.09038	0.265184
B7Z539	cDNA FLJ56954, highly similar to Inter-alpha-trypsin inhibitor heavy chain H1 OS=Homo sapiens PE=2 SV=1 - [B7Z539_HUMAN]	49.61	2	27	1053	645	72.074	7.6792	1.12931	1.06167	1.15953	1.11684	1.10299	1.27738	1.39437	1.25824	0.887616	0.18912
B4E1Z4	cDNA FLJ55673, highly similar to Complement factor B (EC 3.4.21.47) OS=Homo sapiens PE=1 SV=1 - [B4E1Z4_HUMAN]	60.43	20	69	1343	1266	140.853	7.18115	1.07905	1.01828	1.02773	1.04169	1.02858	1.09062	1.00307	1.04076	1.00089	0.978313
B4E1C2	Kininogen 1, isoform CRA_b OS=Homo sapiens GN=KNG1 PE=2 SV=1 - [B4E1C2_HUMAN]	58.23	10	40	1120	644	71.8701	6.81494	1.1261	1.07258	1.07173	1.09014	1.07452	1.04635	1.01031	1.04372	1.04447	0.147111
B4DPP8	cDNA FLJ53075, highly similar to Kininogen-1 OS=Homo sapiens PE=2 SV=1 - [B4DPP8_HUMAN]	74.7	3	33	993	415	46.4668	6.43018	1.14065	1.05462	1.18466	1.12664	0.984218	1.15749	1.08722	1.07631	1.04676	0.470177
B4DU16	cDNA FLJ54550, highly similar to Homo sapiens fibronectin 1 (FN1), transcript variant 6, mRNA OS=Homo sapiens PE=2 SV=1 - [B4DU16_HUMAN]	61.07	1	38	890	894	98.0948	6.23975	1.09803	1.41666	0.625862	1.04685	1.64188	1.09893	1.17334	1.30472	0.80236	0.417856
P00747	Plasminogen OS=Homo sapiens GN=PLG PE=1 SV=2 - [PLMN_HUMAN]	70.74	52	52	1126	810	90.5102	7.23975	1.09869	1.03175	1.06127	1.0639	1.07217	0.997841	0.988707	1.01957	1.04348	0.247504
P02765	Alpha-2-HS-glycoprotein OS=Homo sapiens GN=AHSG PE=1 SV=1 - [FETUA_HUMAN]	56.68	9	16	939	367	39.2997	5.71924	1.21721	0.917376	0.947958	1.02751	1.18117	1.08267	0.943823	1.06922	0.960992	0.740609
P00734	Prothrombin OS=Homo sapiens GN=F2 PE=1 SV=2 - [THRB_HUMAN]	60.77	36	36	890	622	69.9921	5.89697	1.0553	1.02309	1.05736	1.04525	1.08599	0.940531	0.985427	1.00398	1.04111	0.405358
P00738	Haptoglobin OS=Homo sapiens GN=HP PE=1 SV=1 - [HPT_HUMAN]	65.76	13	25	760	406	45.1766	6.58057	0.371214	0.309237	0.319145	0.333199	0.661275	1.41319	2.78663	1.62037	0.205632	0.107513
P02675	Fibrinogen beta chain OS=Homo sapiens GN=FGB PE=1 SV=2 - [FIBB_HUMAN]	74.34	30	30	878	491	55.8923	8.26514	1.09809	0.84206	0.775463	0.905205	1.21492	0.996693	1.26691	1.15951	0.780681	0.119028
Q7Z7Q0	APOB protein OS=Homo sapiens GN=APOB PE=2 SV=1 - [Q7Z7Q0_HUMAN]	70.91	1	56	859	825	92.2752	7.41553	0.200912	0.146861	1.34232	0.563365	1.18088	1.44805	1.0654	1.23144	0.457483	0.175149
P02671	Fibrinogen alpha chain OS=Homo sapiens GN=FGA PE=1 SV=2 - [FIBA_HUMAN]	45.03	37	37	912	866	94.9144	6.01123	1.10847	0.835117	0.762748	0.902113	1.22447	0.991989	1.30584	1.1741	0.768346	0.126275
B7Z8Q7	cDNA FLJ53871, highly similar to Inter-alpha-trypsin inhibitor heavy chain H4 OS=Homo sapiens PE=2 SV=1 - [B7Z8Q7_HUMAN]	51.25	1	24	690	560	62.1228	5.51611	1.0409	0.960458	0.790194	0.930516	1.20191	1.03045	1.04598	1.09278	0.851513	0.15246
P01031	Complement C5 OS=Homo sapiens GN=C5 PE=1 SV=4 - [CO5_HUMAN]	57.82	81	81	871	1676	188.186	6.52197	1.22178	0.918751	0.914574	1.01837	1.20175	0.993991	1.12108	1.10561	0.921095	0.501887
Q5VY30	Retinol binding protein 4, plasma, isoform CRA_b OS=Homo sapiens GN=RBP4 PE=1 SV=2 - [Q5VY30_HUMAN]	77.89	13	13	455	199	22.9591	6.0874	0.960551	0.949153	0.747558	0.885754	1.25445	1.06139	1.04971	1.12185	0.789549	0.0695054
Q9Y490	Talin-1 OS=Homo sapiens GN=TLN1 PE=1 SV=3 - [TLN1_HUMAN]	59.35	99	120	549	2541	269.599	6.07471	0.967408	1.01366	1.3139	1.09832	0.610662	1.05456	1.01174	0.892321	1.23086	0.312203
H7C5H1	Complement factor B (Fragment) OS=Homo sapiens GN=CFB PE=1 SV=1 - [H7C5H1_HUMAN]	81.31	1	24	738	305	34.6699	7.06396	0.764721	0.899423	0.898647	0.854264	0.859258	1.1009	0.769132	0.909763	0.938996	0.636523
B7Z556	cDNA FLJ56822, highly similar to Alpha-2-HS-glycoprotein OS=Homo sapiens PE=2 SV=1 - [B7Z556_HUMAN]	45.31	1	8	525	245	27.3369	6.52197	1.33113	0.90975	0.631966	0.957617	1.09952	1.13151	1.00198	1.07767	0.8886	0.592946
P06396	Gelsolin OS=Homo sapiens GN=GSN PE=1 SV=1 - [GELS_HUMAN]	54.09	1	39	601	782	85.6442	6.27783	1.12766	0.939918	1.13998	1.06919	1.2342	0.974075	0.832051	1.01344	1.05501	0.699523
P02768	Serum albumin OS=Homo sapiens GN=ALB PE=1 SV=2 - [ALBU_HUMAN]	79.31	1	51	736	609	69.3215	6.27783	0.76055	1.49038	0.487791	0.912908	0.381614	0.350025	0.415479	0.382373	2.38748	0.151586
B7Z9A0	cDNA FLJ56212, highly similar to Gelsolin OS=Homo sapiens PE=2 SV=1 - [B7Z9A0_HUMAN]	57.22	1	39	587	755	83.0517	5.84619	1.10367	0.848505	0.844597	0.932258	1.07911	1.1627	0.979553	1.07379	0.868196	0.232764
Q9UNU2	Complement protein C4B frameshift mutant (Fragment) OS=Homo sapiens GN=C4B PE=4 SV=1 - [Q9UNU2_HUMAN]	66.1	1	15	492	354	38.1144	8.52881	0.910904	1.02451	2.00556	1.31366	0.42828	0.849743	0.948888	0.742303	1.76971	0.209446
B7Z992	cDNA FLJ53698, highly similar to Gelsolin OS=Homo sapiens PE=2 SV=1 - [B7Z992_HUMAN]	54.55	1	37	580	715	78.7827	6.11279	0.962139	0.983453	1.46838	1.13799	0.614025	0.963501	0.884991	0.820839	1.38638	0.181476
P06727	Apolipoprotein A-IV OS=Homo sapiens GN=APOA4 PE=1 SV=3 - [APOA4_HUMAN]	81.82	33	34	723	396	45.3715	5.37646	1.17572	1.05907	0.990576	1.07512	1.19485	0.961094	1.06272	1.07289	1.00208	0.980656
B2R8I2	cDNA, FLJ93914, highly similar to Homo sapiens histidine-rich glycoprotein (HRG), mRNA OS=Homo sapiens PE=2 SV=1 - [B2R8I2_HUMAN]	54.1	2	25	630	525	59.4748	7.44482	1.06113	0.862834	0.907251	0.943739	1.22213	0.972963	1.17285	1.12265	0.840636	0.138956
P60709	Actin, cytoplasmic 1 OS=Homo sapiens GN=ACTB PE=1 SV=1 - [ACTB_HUMAN]	58.13	1	17	396	375	41.7097	5.47803	1.0293	0.871351	1.46734	1.12266	0.521387	1.00524	0.936255	0.820961	1.3675	0.266256
P04196	Histidine-rich glycoprotein OS=Homo sapiens GN=HRG PE=1 SV=1 - [HRG_HUMAN]	52.57	1	24	622	525	59.5409	7.50342	1.5386	0.467693	1.19143	1.06591	1.54274	0.838954	0.507761	0.96315	1.10669	0.826378
F6KPG5	Albumin (Fragment) OS=Homo sapiens PE=2 SV=1 - [F6KPG5_HUMAN]	82.56	1	51	713	585	66.488	6.03662	0.765517	1.48205	0.427914	0.891827	0.217222	0.249142	0.288262	0.251542	3.54544	0.10898
P63261	Actin, cytoplasmic 2 OS=Homo sapiens GN=ACTG1 PE=1 SV=1 - [ACTG_HUMAN]	58.13	1	17	382	375	41.7658	5.47803	1.02941	1.07909	0.990478	1.03299	0.762287	1.32797	0.855004	0.981755	1.05219	0.786637
Q6ZW64	cDNA FLJ41552 fis, clone COLON2004478, highly similar to Protein Tro alpha1 H,myeloma OS=Homo sapiens PE=2 SV=1 - [Q6ZW64_HUMAN]	43.32	2	15	434	494	53.2872	6.52197	0.513169	0.336987	0.397558	0.415905	0.830063	0.85455	1.93222	1.20561	0.344974	0.0978049
P13671	Complement component C6 OS=Homo sapiens GN=C6 PE=1 SV=3 - [CO6_HUMAN]	45.18	3	39	470	934	104.718	6.75635	1.16578	1.02629	1.05201	1.08136	1.12118	0.941282	1.01774	1.02673	1.05321	0.463638
B2R950	cDNA, FLJ94213, highly similar to Homo sapiens pregnancy-zone protein (PZP), mRNA OS=Homo sapiens PE=2 SV=1 - [B2R950_HUMAN]	34.55	29	45	453	1482	163.768	6.37939	0.871359	0.966046	0.606387	0.814598	1.16343	0.942658	1.08756	1.06455	0.765204	0.117474
P02760	Protein AMBP OS=Homo sapiens GN=AMBP PE=1 SV=1 - [AMBP_HUMAN]	48.01	14	14	385	352	38.974	6.25244	1.1148	0.99118	0.955985	1.02066	1.13075	0.961206	1.03131	1.04109	0.980372	0.781354
A8K8Z4	cDNA FLJ78071, highly similar to Human MHC class III complement component C6 mRNA OS=Homo sapiens PE=2 SV=1 - [A8K8Z4_HUMAN]	42.08	1	37	454	934	104.649	6.62451	1.15995	1.3697	0.59577	1.0418	1.02681	0.967419	1.07656	1.02359	1.01779	0.941518
G3XAM2	Complement factor I OS=Homo sapiens GN=CFI PE=1 SV=1 - [G3XAM2_HUMAN]	47.74	7	25	392	576	65.0163	7.50342	0.974589	1.10181	0.994983	1.02379	1.13213	1.00068	0.963108	1.03197	0.992073	0.905443
P43652	Afamin OS=Homo sapiens GN=AFM PE=1 SV=1 - [AFAM_HUMAN]	62.44	39	39	586	599	69.024	5.89697	1.15783	1.235	1.06149	1.15144	1.13567	0.872527	0.965532	0.991244	1.16161	0.15643
D6RF20	Vitamin D-binding protein (Fragment) OS=Homo sapiens GN=GC PE=1 SV=1 - [D6RF20_HUMAN]	75.86	1	11	453	145	16.0728	5.8335	1.53197	1.03533	0.851474	1.13959	1.1843	0.989612	1.00053	1.05815	1.07697	0.721417
Q5EFE6	Anti-RhD monoclonal T125 kappa light chain OS=Homo sapiens PE=2 SV=1 - [Q5EFE6_HUMAN]	42.74	1	6	282	234	25.6817	8.42627	0.547959	0.381882	0.510013	0.479951	0.633518	0.71851	1.04718	0.799734	0.600138	0.0780575
A8K2N0	cDNA FLJ77835, highly similar to Homo sapiens complement component 1, s subcomponent (C1S), transcript variant 2, mRNA OS=Homo sapiens PE=2 SV=1 - [A8K2N0_HUMAN]	47.24	25	26	345	688	76.5628	4.98291	1.15797	1.05303	0.915837	1.04228	1.08445	0.967569	0.98685	1.01296	1.02895	0.72899
B2R6W1	cDNA, FLJ93143, highly similar to Homo sapiens complement component 7 (C7), mRNA OS=Homo sapiens PE=2 SV=1 - [B2R6W1_HUMAN]	60.38	1	39	361	843	93.4853	6.48096	1.35468	1.35926	0.870225	1.19472	1.07854	0.754609	1.03499	0.956046	1.24965	0.280397
P10643	Complement component C7 OS=Homo sapiens GN=C7 PE=1 SV=2 - [CO7_HUMAN]	61.57	2	40	363	843	93.4573	6.48096	1.41379	0.978253	0.981823	1.12462	1.08093	1.08918	0.877275	1.0158	1.10713	0.53455
B4E1D8	cDNA FLJ51597, highly similar to C4b-binding protein alpha chain OS=Homo sapiens PE=2 SV=1 - [B4E1D8_HUMAN]	58.4	2	27	488	536	60.3658	6.65381	0.918546	0.831813	0.960018	0.903459	1.30898	1.0046	1.11081	1.14147	0.791491	0.0699022
P04003	C4b-binding protein alpha chain OS=Homo sapiens GN=C4BPA PE=1 SV=2 - [C4BPA_HUMAN]	51.09	1	26	485	597	66.9894	7.29834	1.08032	0.655373	0.652413	0.796034	1.01741	1.43912	1.25224	1.23625	0.643908	0.0785076
A0A024QZN4	Vinculin, isoform CRA_c OS=Homo sapiens GN=VCL PE=4 SV=1 - [A0A024QZN4_HUMAN]	74.11	13	73	393	1066	116.649	6.0874	0.889989	1.08963	1.27459	1.08473	0.648491	1.00115	0.892208	0.847284	1.28025	0.194028
Q6GMX4	IGL@ protein OS=Homo sapiens GN=IGL@ PE=2 SV=1 - [Q6GMX4_HUMAN]	50	1	9	328	236	24.7941	6.88818	0.822045	1.18028	0.503207	0.835176	1.20166	0.925029	1.11301	1.0799	0.773382	0.3124
Q6IN99	IGL@ protein OS=Homo sapiens GN=IGL@ PE=2 SV=1 - [Q6IN99_HUMAN]	50.21	1	10	332	235	24.8722	6.7417	0.758819	0.595286	0.861484	0.738529	0.826671	1.11212	1.59536	1.17805	0.626909	0.137705
A0A140VJJ6	Testicular tissue protein Li 70 OS=Homo sapiens PE=2 SV=1 - [A0A140VJJ6_HUMAN]	75.06	3	28	494	437	49.465	6.0874	1.12892	0.852564	0.697864	0.893116	1.22152	0.990516	1.34653	1.18619	0.752929	0.147737
Q6ZVX0	cDNA FLJ41981 fis, clone SMINT2011888, highly similar to Protein Tro alpha1 H,myeloma OS=Homo sapiens PE=2 SV=1 - [Q6ZVX0_HUMAN]	49.49	1	15	352	487	52.841	5.92236	0.602023	0.294243	0.616003	0.50409	1.0154	0.778651	1.59595	1.13	0.446097	0.0771417
P05546	Heparin cofactor 2 OS=Homo sapiens GN=SERPIND1 PE=1 SV=3 - [HEP2_HUMAN]	55.71	24	24	348	499	57.0342	6.90283	1.09749	1.03617	1.05393	1.06253	1.01289	1.02087	1.08012	1.03796	1.02367	0.429094
P04004	Vitronectin OS=Homo sapiens GN=VTN PE=1 SV=1 - [VTNC_HUMAN]	47.28	18	18	427	478	54.2712	5.79541	1.099	1.10947	1.08833	1.09894	1.05458	0.9751	0.897874	0.975851	1.12613	0.0542975
Q6P089	IGH@ protein OS=Homo sapiens GN=IGH@ PE=2 SV=1 - [Q6P089_HUMAN]	47.08	1	14	339	480	51.9646	6.31592	0.391251	0.227057	0.264984	0.294431	1.08641	1.03884	2.55263	1.55929	0.188823	0.0644517
Q6LAM1	Heavy chain of factor I (Fragment) OS=Homo sapiens PE=2 SV=1 - [Q6LAM1_HUMAN]	57.32	1	19	308	321	35.8589	7.59131	1.01385	1.05352	1.08816	1.05184	1.15649	1.00721	1.04265	1.06878	0.984153	0.751307
D3DP16	Fibrinogen gamma chain, isoform CRA_a OS=Homo sapiens GN=FGG PE=4 SV=1 - [D3DP16_HUMAN]	84.73	1	26	454	334	37.7142	6.29053	1.08837	0.866702	0.704498	0.886522	1.44152	0.864211	1.2576	1.18777	0.746372	0.212696
P02649	Apolipoprotein E OS=Homo sapiens GN=APOE PE=1 SV=1 - [APOE_HUMAN]	77.29	11	25	301	317	36.1318	5.73193	1.0748	1.03997	1.2419	1.11889	1.03349	0.766522	0.90614	0.902049	1.24039	0.0939644
D9IWP9	Beta-2-glycoprotein I (Fragment) OS=Homo sapiens PE=2 SV=1 - [D9IWP9_HUMAN]	66.26	21	21	509	326	36.2306	8.00146	1.16593	0.882486	1.08724	1.04522	1.21006	1.0329	0.972704	1.07189	0.975118	0.82115
B4E3Q9	cDNA FLJ59659, highly similar to Vinculin OS=Homo sapiens PE=2 SV=1 - [B4E3Q9_HUMAN]	68.39	1	61	316	927	100.875	5.47803	1.04824	1.08316	1.22215	1.11785	0.776129	1.0125	0.923474	0.904034	1.23651	0.0698974
P04217	Alpha-1B-glycoprotein OS=Homo sapiens GN=A1BG PE=1 SV=4 - [A1BG_HUMAN]	57.17	16	16	476	495	54.2195	5.85889	1.1287	0.979753	1.02765	1.04537	1.08342	0.97165	1.01942	1.02483	1.02004	0.725707
P03952	Plasma kallikrein OS=Homo sapiens GN=KLKB1 PE=1 SV=1 - [KLKB1_HUMAN]	52.19	32	32	375	638	71.3228	8.22119	0.954305	0.986854	1.04697	0.996045	1.08912	1.01048	0.960807	1.02014	0.976385	0.629407
A0A024R035	Complement component 9, isoform CRA_a OS=Homo sapiens GN=C9 PE=4 SV=1 - [A0A024R035_HUMAN]	50.27	27	27	357	559	63.1627	5.51611	1.15673	0.966738	1.07355	1.06567	1.15007	0.970495	1.17768	1.09942	0.96931	0.711992
P25311	Zinc-alpha-2-glycoprotein OS=Homo sapiens GN=AZGP1 PE=1 SV=2 - [ZA2G_HUMAN]	60.74	21	21	423	298	34.2371	6.04932	1.13968	0.866192	1.05925	1.02171	1.17754	1.01942	1.05952	1.0855	0.941237	0.534665
A0M8Q6	Immunoglobulin lambda constant 7 OS=Homo sapiens GN=IGLC7 PE=1 SV=3 - [IGLC7_HUMAN]	65.09	2	6	207	106	11.2466	8.29443	0.42366	0.212634	0.418963	0.351753	0.833957	0.812754	2.58314	1.40995	0.249479	0.147724
P07357	Complement component C8 alpha chain OS=Homo sapiens GN=C8A PE=1 SV=2 - [CO8A_HUMAN]	46.4	20	20	225	584	65.121	6.46826	1.15411	1.08772	1.05514	1.09899	1.11477	0.953657	1.03738	1.03527	1.06155	0.310224
Q53GY3	Angiotensinogen variant (Fragment) OS=Homo sapiens PE=2 SV=1 - [Q53GY3_HUMAN]	44.54	16	16	227	485	53.0505	6.23975	1.19552	1.04966	1.12208	1.12242	1.10781	0.925248	0.951465	0.994841	1.12824	0.146149
Q06033	Inter-alpha-trypsin inhibitor heavy chain H3 OS=Homo sapiens GN=ITIH3 PE=1 SV=2 - [ITIH3_HUMAN]	32.81	29	29	330	890	99.7865	5.74463	1.17058	0.979906	1.04425	1.06491	1.03178	0.970451	1.18068	1.06097	1.00371	0.964777
B1AKG0	Complement factor H-related protein 1 OS=Homo sapiens GN=CFHR1 PE=1 SV=1 - [B1AKG0_HUMAN]	45.76	1	12	277	271	30.8379	7.81104	1.18755	0.914912	1.26759	1.12335	1.22571	0.931392	1.13099	1.09603	1.02492	0.852262
Q96PD5	N-acetylmuramoyl-L-alanine amidase OS=Homo sapiens GN=PGLYRP2 PE=1 SV=1 - [PGRP2_HUMAN]	40.63	11	13	171	576	62.1779	7.54736	1.24525	1.04047	1.03836	1.10803	1.09231	0.954457	0.907953	0.984908	1.12501	0.23505
A0A1U9X8W4	C2 OS=Homo sapiens PE=3 SV=1 - [A0A1U9X8W4_HUMAN]	44.55	6	33	317	752	83.2744	7.41553	1.09674	1.10477	0.874321	1.02528	1.17362	0.974015	0.981897	1.04318	0.982842	0.866394
H7C0N0	Inter-alpha-trypsin inhibitor heavy chain H1 (Fragment) OS=Homo sapiens GN=ITIH1 PE=1 SV=1 - [H7C0N0_HUMAN]	25	1	8	272	464	51.831	6.18896	1.04179	0.952242	1.07169	1.02191	1.14896	0.987006	1.03846	1.05814	0.965757	0.576984
B4DN21	cDNA FLJ53365, highly similar to Homo sapiens fibronectin 1 (FN1), transcript variant 4, mRNA OS=Homo sapiens PE=2 SV=1 - [B4DN21_HUMAN]	62.09	2	14	236	306	34.4778	5.64307	1.11404	1.07502	0.893474	1.02751	1.22618	0.883204	0.911061	1.00682	1.02055	0.880591
P01024	Complement C3 OS=Homo sapiens GN=C3 PE=1 SV=2 - [CO3_HUMAN]	51.47	78	78	309	1663	187.03	6.40479	0.979035	1.03863	0.975993	0.997885	1.11338	1.02614	1.06586	1.06846	0.933944	0.0951286
Q53HT9	Complement component 1, r subcomponent variant (Fragment) OS=Homo sapiens PE=2 SV=1 - [Q53HT9_HUMAN]	52.48	27	29	264	705	80.189	6.44287	1.22258	1.02848	0.958625	1.06989	1.15178	0.984649	0.985951	1.04079	1.02796	0.778051
B7Z550	Complement component 8, beta polypeptide, isoform CRA_b OS=Homo sapiens GN=C8B PE=2 SV=1 - [B7Z550_HUMAN]	67.86	31	31	301	529	60.101	7.76709	1.14817	1.12049	1.06584	1.1115	1.08234	0.990528	1.01896	1.03061	1.07849	0.0900882
A0A0S2Z3V0	Apolipoprotein E isoform 2 (Fragment) OS=Homo sapiens GN=APOE PE=2 SV=1 - [A0A0S2Z3V0_HUMAN]	81.48	1	15	196	189	21.669	4.7417	1.72506	0.589563	0.707529	1.00739	1.78804	0.577153	0.649715	1.00497	1.0024	0.996599
P51884	Lumican OS=Homo sapiens GN=LUM PE=1 SV=2 - [LUM_HUMAN]	43.2	13	13	234	338	38.4048	6.60986	1.15415	1.06268	0.94316	1.05333	1.07704	1.02198	0.924707	1.00791	1.04506	0.58034
P05543	Thyroxine-binding globulin OS=Homo sapiens GN=SERPINA7 PE=1 SV=2 - [THBG_HUMAN]	50.6	19	19	234	415	46.2946	6.30322	1.22087	1.04215	1.02302	1.09535	1.06903	1.01955	0.910763	0.99978	1.09559	0.290099
P08697	Alpha-2-antiplasmin OS=Homo sapiens GN=SERPINF2 PE=1 SV=3 - [A2AP_HUMAN]	41.55	18	18	220	491	54.5311	6.29053	1.10484	1.00467	1.00323	1.03758	1.07108	0.964935	1.01502	1.01701	1.02023	0.674677
P0DOX2	Immunoglobulin alpha-2 heavy chain OS=Homo sapiens PE=1 SV=1 - [IGA2_HUMAN]	47.91	2	14	245	455	48.9042	6.81494	0.412185	0.351155	0.312005	0.358448	1.01523	0.665088	2.15603	1.27878	0.280304	0.110896
P21333	Filamin-A OS=Homo sapiens GN=FLNA PE=1 SV=4 - [FLNA_HUMAN]	43.97	90	90	251	2647	280.564	6.06201	0.861556	0.726579	1.69498	1.09437	0.574048	1.03382	1.41425	1.00737	1.08636	0.833656
H6VRF8	Keratin 1 OS=Homo sapiens GN=KRT1 PE=3 SV=1 - [H6VRF8_HUMAN]	47.52	28	34	214	644	66.013	8.11865	1.22961	1.10701	0.944668	1.09376	0.963507	1.0254	0.953595	0.980836	1.11513	0.257191
P02647	Apolipoprotein A-I OS=Homo sapiens GN=APOA1 PE=1 SV=1 - [APOA1_HUMAN]	65.17	19	19	251	267	30.7589	5.75732	0.579898	0.351674	0.346651	0.426074	0.61728	0.576836	0.559265	0.58446	0.729005	0.114868
P0DOX6	Immunoglobulin mu heavy chain OS=Homo sapiens PE=1 SV=1 - [IGM_HUMAN]	39.76	1	19	199	576	63.4462	7.86963	0.577127	0.594395	0.359339	0.510287	0.87215	0.605569	2.04462	1.17411	0.434615	0.21289
P68871	Hemoglobin subunit beta OS=Homo sapiens GN=HBB PE=1 SV=2 - [HBB_HUMAN]	82.99	1	11	162	147	15.9883	7.28369	0.285278	0.184707	0.234515	0.234833	0.698449	1.339	3.15827	1.7319	0.135592	0.112164
P36955	Pigment epithelium-derived factor OS=Homo sapiens GN=SERPINF1 PE=1 SV=4 - [PEDF_HUMAN]	52.63	20	20	221	418	46.2833	6.37939	1.10173	1.04506	0.998091	1.0483	1.22632	1.02083	1.0949	1.11402	0.941006	0.383096
P01009	Alpha-1-antitrypsin OS=Homo sapiens GN=SERPINA1 PE=1 SV=3 - [A1AT_HUMAN]	62.2	28	28	278	418	46.707	5.59229	0.902467	0.343241	0.568105	0.604604	0.394849	0.382838	0.375746	0.384478	1.57253	0.24714
P12814	Alpha-actinin-1 OS=Homo sapiens GN=ACTN1 PE=1 SV=2 - [ACTN1_HUMAN]	61.88	34	50	218	892	102.993	5.41455	0.884531	1.00002	1.24952	1.04469	0.519637	0.963107	1.0813	0.85468	1.22232	0.400274
P22792	Carboxypeptidase N subunit 2 OS=Homo sapiens GN=CPN2 PE=1 SV=3 - [CPN2_HUMAN]	36.51	15	15	219	545	60.5181	5.98584	1.15045	0.98991	1.06273	1.0677	1.11719	1.02375	0.953649	1.03153	1.03506	0.614486
O75882	Attractin OS=Homo sapiens GN=ATRN PE=1 SV=2 - [ATRN_HUMAN]	23.51	1	34	212	1429	158.432	7.31299	1.03475	1.12851	0.930515	1.03126	1.0506	1.03993	0.963066	1.01787	1.01316	0.843251
Q6GMW4	IGL@ protein OS=Homo sapiens GN=IGL@ PE=2 SV=1 - [Q6GMW4_HUMAN]	47.64	1	9	188	233	24.8393	6.7417	0.655906	0.675944	0.979479	0.770443	0.745375	1.02598	1.22846	0.99994	0.770489	0.259598
B4DZ36	cDNA FLJ58441, highly similar to Attractin OS=Homo sapiens PE=2 SV=1 - [B4DZ36_HUMAN]	28.37	1	34	210	1156	129.748	6.87354	1.04954	1.02411	1.17641	1.08335	0.931125	1.04637	0.787367	0.921622	1.17549	0.141628
Q68CK4	Leucine-rich alpha-2-glycoprotein OS=Homo sapiens GN=HMFT1766 PE=2 SV=1 - [Q68CK4_HUMAN]	42.07	1	12	188	347	38.1441	6.94678	1.11546	1.46533	0.301842	0.960878	0.786511	1.18398	1.9684	1.31296	0.73184	0.511535
P02775	Platelet basic protein OS=Homo sapiens GN=PPBP PE=1 SV=3 - [CXCL7_HUMAN]	51.56	9	9	230	128	13.8854	8.79248	0.809876	1.1214	1.37855	1.10327	0.508802	1.02662	0.84133	0.79225	1.39258	0.236534
P02743	Serum amyloid P-component OS=Homo sapiens GN=APCS PE=1 SV=2 - [SAMP_HUMAN]	31.84	7	7	168	223	25.3711	6.53662	1.05064	0.956974	1.0941	1.0339	1.14663	0.987614	1.15343	1.09589	0.943438	0.411143
Q6N094	Uncharacterized protein DKFZp686O01196 OS=Homo sapiens GN=DKFZp686O01196 PE=2 SV=1 - [Q6N094_HUMAN]	30	1	12	158	480	52.5794	8.17725	0.734361	0.529431	0.509208	0.591	1.20047	0.932883	1.81728	1.31688	0.448789	0.0556276
P35908	Keratin, type II cytoskeletal 2 epidermal OS=Homo sapiens GN=KRT2 PE=1 SV=2 - [K22E_HUMAN]	52.11	25	33	157	639	65.3932	8.00146	1.37659	1.57757	0.84886	1.26767	0.776293	0.959479	0.995132	0.910301	1.39258	0.191501
B0AZL7	cDNA, FLJ79457, highly similar to Insulin-like growth factor-binding proteincomplex acid labile chain OS=Homo sapiens PE=2 SV=1 - [B0AZL7_HUMAN]	45.79	22	22	149	605	65.9598	6.78564	1.00419	1.0195	0.998157	1.00728	1.15281	0.97642	0.983192	1.03747	0.9709	0.630456
P02750	Leucine-rich alpha-2-glycoprotein OS=Homo sapiens GN=LRG1 PE=1 SV=2 - [A2GL_HUMAN]	42.07	1	12	185	347	38.1541	6.94678	1.60751	0.648252	0.760128	1.0053	1.60877	1.35299	0.684848	1.21554	0.82704	0.634605
A8K3K1	cDNA FLJ78096, highly similar to Homo sapiens actin, alpha, cardiac muscle (ACTC), mRNA OS=Homo sapiens PE=2 SV=1 - [A8K3K1_HUMAN]	37.67	1	12	222	377	42.0199	5.38916	0.899909	1.07245	1.17423	1.04886	0.592488	1.03656	1.0993	0.90945	1.15329	0.478384
P23142	Fibulin-1 OS=Homo sapiens GN=FBLN1 PE=1 SV=4 - [FBLN1_HUMAN]	39.26	6	20	146	703	77.1624	5.22412	1.35462	1.10542	1.09894	1.18633	1.16294	0.863193	0.912561	0.979565	1.21107	0.174201
P13645	Keratin, type I cytoskeletal 10 OS=Homo sapiens GN=KRT10 PE=1 SV=6 - [K1C10_HUMAN]	52.91	26	29	161	584	58.7917	5.21143	1.35557	1.44149	0.822917	1.20666	0.854757	0.953274	1.08317	0.963734	1.25207	0.300509
B2R6V9	cDNA, FLJ93141, highly similar to Homo sapiens coagulation factor XIII, A1 polypeptide (F13A1), mRNA OS=Homo sapiens PE=2 SV=1 - [B2R6V9_HUMAN]	36.34	24	24	157	732	83.1886	5.99854	0.966804	1.01654	0.963169	0.98217	0.99733	0.962407	1.03391	0.997881	0.984255	0.590239
P12259	Coagulation factor V OS=Homo sapiens GN=F5 PE=1 SV=4 - [FA5_HUMAN]	28.24	50	58	215	2224	251.546	6.04932	1.26277	1.01718	1.039	1.10632	1.07836	0.909595	0.992428	0.993462	1.1136	0.288892
B2R9F2	cDNA, FLJ94361, highly similar to Homo sapiens serine (or cysteine) proteinase inhibitor, clade A(alpha-1 antiproteinase, antitrypsin), member 6 (SERPINA6), mRNA OS=Homo sapiens PE=2 SV=1 - [B2R9F2_HUMAN]	31.6	10	10	178	405	45.0659	6.03662	1.01803	0.972353	0.881042	0.957142	1.11063	1.02356	0.980671	1.03829	0.921848	0.217719
A0A1B1CYC9	Vitamin D binding protein (Fragment) OS=Homo sapiens GN=Gc PE=4 SV=1 - [A0A1B1CYC9_HUMAN]	65.63	7	7	151	32	3.49682	9.11475	0.839353	1.20465	0.798635	0.947545	0.931601	0.551771	1.10508	0.862819	1.0982	0.704921
B3VL17	Beta globin (Fragment) OS=Homo sapiens PE=3 SV=1 - [B3VL17_HUMAN]	93.33	1	10	122	105	11.4748	6.3667	0.712441	0.549699	0.679717	0.647286	0.821827	1.07799	1.79063	1.23015	0.526185	0.118514
P07360	Complement component C8 gamma chain OS=Homo sapiens GN=C8G PE=1 SV=3 - [CO8G_HUMAN]	79.7	12	12	117	202	22.2635	8.30908	1.0843	1.04276	1.07503	1.06736	1.11523	0.997631	1.05285	1.05524	1.01149	0.754676
B2R815	cDNA, FLJ93695, highly similar to Homo sapiens serpin peptidase inhibitor, clade A (alpha-1 antiproteinase, antitrypsin), member 4 (SERPINA4), mRNA OS=Homo sapiens PE=2 SV=1 - [B2R815_HUMAN]	55.27	21	21	174	427	48.4951	7.75244	1.14574	1.02011	0.999379	1.05508	1.20703	1.0125	0.970782	1.06344	0.992138	0.927208
A8K1K1	cDNA FLJ76342, highly similar to Homo sapiens carnosine dipeptidase 1 (metallopeptidase M20 family)(CNDP1), mRNA OS=Homo sapiens PE=2 SV=1 - [A8K1K1_HUMAN]	48.52	19	19	141	507	56.6982	5.36377	0.897529	1.12986	0.999459	1.00895	1.11869	0.909416	1.00915	1.01242	0.996572	0.971218
P35527	Keratin, type I cytoskeletal 9 OS=Homo sapiens GN=KRT9 PE=1 SV=3 - [K1C9_HUMAN]	45.43	23	24	142	623	62.0268	5.23682	1.19678	0.952376	0.986356	1.04517	0.99583	1.05482	0.857878	0.96951	1.07804	0.47541
P05160	Coagulation factor XIII B chain OS=Homo sapiens GN=F13B PE=1 SV=3 - [F13B_HUMAN]	56.28	29	29	164	661	75.4612	6.39209	1.02474	1.00702	0.916913	0.98289	1.19159	0.974661	1.06668	1.07765	0.912071	0.2539
Q13707	ACTA2 protein (Fragment) OS=Homo sapiens GN=ACTA2 PE=3 SV=1 - [Q13707_HUMAN]	35.45	1	9	197	330	36.7832	5.35107	1.05194	1.11338	0.910438	1.02525	0.879811	1.00484	1.0482	0.977618	1.04872	0.576617
B4DUV1	Fibulin-1 OS=Homo sapiens PE=2 SV=1 - [B4DUV1_HUMAN]	37.13	1	17	121	641	70.1077	5.26221	0.890226	1.09121	0.700252	0.893897	1.12809	1.03056	1.03433	1.06432	0.839872	0.219892
L8E853	von Willebrand factor OS=Homo sapiens GN=VWF PE=4 SV=1 - [L8E853_HUMAN]	28.99	1	67	183	2715	298.181	5.47803	1.0921	0.650186	0.443778	0.728688	1.04596	0.96476	1.14473	1.05182	0.692789	0.178332
P04275	von Willebrand factor OS=Homo sapiens GN=VWF PE=1 SV=4 - [VWF_HUMAN]	28.65	2	68	183	2813	309.058	5.47803	0.823999	0.661594	1.43005	0.971882	0.92685	1.27284	0.943353	1.04768	0.927649	0.784786
B1AHL2	Fibulin-1 OS=Homo sapiens GN=FBLN1 PE=1 SV=1 - [B1AHL2_HUMAN]	29.96	1	16	119	721	78.2769	5.38916	1.07347	1.23696	0.746217	1.01888	1.17372	0.885932	1.06138	1.04035	0.97937	0.903837
B2R582	cDNA, FLJ92374, highly similar to Homo sapiens C-type lectin domain family 3, member B (CLEC3B), mRNA OS=Homo sapiens PE=2 SV=1 - [B2R582_HUMAN]	69.8	1	11	126	202	22.5223	6.03662	1.05519	0.898031	0.881791	0.945004	1.24086	1.08322	0.962662	1.09558	0.862562	0.198117
P07225	Vitamin K-dependent protein S OS=Homo sapiens GN=PROS1 PE=1 SV=1 - [PROS_HUMAN]	40.09	1	23	202	676	75.0739	5.66846	0.977215	0.901767	0.961882	0.946955	1.17318	0.995388	1.15265	1.10707	0.855369	0.0576889
Q16610	Extracellular matrix protein 1 OS=Homo sapiens GN=ECM1 PE=1 SV=2 - [ECM1_HUMAN]	58.89	25	25	179	540	60.6353	6.7124	1.12693	1.04232	0.911552	1.02694	1.11837	0.948472	0.995933	1.02092	1.00589	0.944083
Q4TZM4	Hemoglobin beta chain (Fragment) OS=Homo sapiens GN=HBB PE=3 SV=1 - [Q4TZM4_HUMAN]	89.11	1	7	93	101	11.0156	6.52197	0.409861	0.314185	0.148654	0.2909	0.780469	1.55269	2.87172	1.73496	0.16767	0.0787741
P63104	14-3-3 protein zeta/delta OS=Homo sapiens GN=YWHAZ PE=1 SV=1 - [1433Z_HUMAN]	75.51	13	19	134	245	27.7277	4.79248	0.968922	1.05165	1.25235	1.09098	0.545465	0.995824	0.915221	0.818836	1.33235	0.168667
Q16519	Protein S (Fragment) OS=Homo sapiens GN=PROS1 PE=4 SV=1 - [Q16519_HUMAN]	41.69	1	23	189	650	72.4155	5.73193	0.875038	0.941053	0.884672	0.900254	1.13115	0.993598	1.35312	1.15929	0.776556	0.0722304
P00742	Coagulation factor X OS=Homo sapiens GN=F10 PE=1 SV=2 - [FA10_HUMAN]	33.2	16	17	125	488	54.6965	5.93506	1.01924	1.01689	1.08391	1.04001	1.12582	0.960987	1.00136	1.02939	1.01032	0.854305
P80108	Phosphatidylinositol-glycan-specific phospholipase D OS=Homo sapiens GN=GPLD1 PE=1 SV=3 - [PHLD_HUMAN]	36.07	23	23	110	840	92.278	6.3667	1.05013	1.05222	0.988957	1.03044	1.11886	0.92799	0.966095	1.00432	1.02601	0.694718
P67936	Tropomyosin alpha-4 chain OS=Homo sapiens GN=TPM4 PE=1 SV=3 - [TPM4_HUMAN]	62.5	7	22	148	248	28.5045	4.69092	0.943848	0.999597	1.36172	1.10172	0.553279	0.96027	0.912697	0.808749	1.36225	0.185549
P03951	Coagulation factor XI OS=Homo sapiens GN=F11 PE=1 SV=1 - [FA11_HUMAN]	48.48	27	27	129	625	70.0636	8.104	1.04016	0.989752	1.10437	1.04476	1.06148	0.979481	1.04409	1.02835	1.01595	0.712776
P37802	Transgelin-2 OS=Homo sapiens GN=TAGLN2 PE=1 SV=3 - [TAGL2_HUMAN]	83.42	13	13	75	199	22.3772	8.25049	0.888272	1.00563	1.28435	1.05942	0.532897	1.04816	0.915313	0.832124	1.27315	0.306465
D6RE86	Ceruloplasmin (Fragment) OS=Homo sapiens GN=CP PE=1 SV=8 - [D6RE86_HUMAN]	40.45	1	6	150	178	20.7486	7.23975	0.949793	0.988064	1.01429	0.984049	1.12315	0.971868	1.09543	1.06348	0.925307	0.188242
F2RM37	Coagulation factor IX OS=Homo sapiens GN=F9 p22 PE=2 SV=1 - [F2RM37_HUMAN]	40.13	14	15	91	461	51.711	5.46533	1.0642	0.976808	1.08389	1.04163	1.16106	0.967275	1.07734	1.06856	0.974803	0.70018
P02652	Apolipoprotein A-II OS=Homo sapiens GN=APOA2 PE=1 SV=1 - [APOA2_HUMAN]	64	7	7	100	100	11.1679	6.62451	0.727163	0.696152	0.652505	0.69194	0.846381	0.762335	0.680901	0.763206	0.906623	0.245805
P07737	Profilin-1 OS=Homo sapiens GN=PFN1 PE=1 SV=2 - [PROF1_HUMAN]	77.14	8	8	105	140	15.0446	8.26514	0.921417	1.0183	1.31618	1.0853	0.560023	1.05491	0.919417	0.844784	1.28471	0.273192
Q14520	Hyaluronan-binding protein 2 OS=Homo sapiens GN=HABP2 PE=1 SV=1 - [HABP2_HUMAN]	26.07	15	15	173	560	62.6304	6.53662	1.02451	0.946229	1.10176	1.02417	1.16934	0.961941	1.03332	1.05486	0.970898	0.705502
P48740	Mannan-binding lectin serine protease 1 OS=Homo sapiens GN=MASP1 PE=1 SV=3 - [MASP1_HUMAN]	34.05	18	19	105	699	79.1952	5.49072	1.21531	1.02307	1.0499	1.09609	1.16387	0.983162	0.893207	1.01341	1.08159	0.453696
K7ER74	APOC4-APOC2 readthrough (NMD candidate) OS=Homo sapiens GN=APOC4-APOC2 PE=1 SV=1 - [K7ER74_HUMAN]	33.15	4	5	78	178	20.0363	6.63916	0.612157	0.814165	0.940499	0.78894	0.851903	0.763897	0.655304	0.757035	1.04215	0.788508
Q86UX7	Fermitin family homolog 3 OS=Homo sapiens GN=FERMT3 PE=1 SV=1 - [URP2_HUMAN]	49.48	27	27	113	667	75.905	6.97607	0.988001	1.04998	1.25888	1.09895	0.598096	1.08013	0.877697	0.851973	1.28989	0.202038
E1B4S9	Apolipoprotein B (Fragment) OS=Homo sapiens GN=APOB PE=4 SV=1 - [E1B4S9_HUMAN]	50.9	1	11	140	222	26.3018	5.61768	0.856901	1.1565	0.771322	0.928241	1.1537	0.857971	0.870298	0.960656	0.966258	0.841087
V9GYE7	Complement factor H-related protein 2 OS=Homo sapiens GN=CFHR2 PE=1 SV=1 - [V9GYE7_HUMAN]	46.85	5	10	117	254	28.8929	6.81494	0.96319	1.11374	0.836865	0.971265	1.27235	1.03893	0.997092	1.10279	0.880733	0.324603
Q562R1	Beta-actin-like protein 2 OS=Homo sapiens GN=ACTBL2 PE=1 SV=2 - [ACTBL_HUMAN]	16.76	1	5	113	376	41.976	5.59229	1.00648	1.03416	1.12603	1.05556	0.834547	1.00012	1.00961	0.948091	1.11335	0.185797
P07195	L-lactate dehydrogenase B chain OS=Homo sapiens GN=LDHB PE=1 SV=2 - [LDHB_HUMAN]	44.61	12	13	70	334	36.6151	6.04932	0.972819	1.06748	1.05223	1.03084	0.73076	1.01379	0.983492	0.909348	1.1336	0.267513
P26927	Hepatocyte growth factor-like protein OS=Homo sapiens GN=MST1 PE=1 SV=2 - [HGFL_HUMAN]	49.51	20	26	106	711	80.2675	7.6792	1.15175	1.02144	1.08869	1.08729	1.04844	0.976254	0.969158	0.997951	1.08952	0.120198
P07996	Thrombospondin-1 OS=Homo sapiens GN=THBS1 PE=1 SV=2 - [TSP1_HUMAN]	35.38	1	36	102	1170	129.3	4.94482	0.526182	1.20427	1.75372	1.16139	0.358708	1.25027	1.04888	0.885956	1.31089	0.570277
A0A024R9Q1	Thrombospondin 1, isoform CRA_a OS=Homo sapiens GN=THBS1 PE=4 SV=1 - [A0A024R9Q1_HUMAN]	35.38	1	36	101	1170	129.27	4.94482	0.651154	2.29381	0.707497	1.21749	0.759336	0.467345	0.795956	0.674212	1.80579	0.377896
P02042	Hemoglobin subunit delta OS=Homo sapiens GN=HBD PE=1 SV=2 - [HBD_HUMAN]	74.15	4	10	66	147	16.0453	8.04541	0.473614	0.430958	0.400246	0.434939	0.817685	1.27974	2.42429	1.50724	0.288567	0.0883009
Q9UK55	Protein Z-dependent protease inhibitor OS=Homo sapiens GN=SERPINA10 PE=1 SV=1 - [ZPI_HUMAN]	44.37	2	17	81	444	50.6742	8.26514	1.18362	0.926039	0.786203	0.965287	0.947029	1.32116	1.3667	1.21163	0.796685	0.235732
B2RBZ5	cDNA, FLJ95778, highly similar to Homo sapiens serpin peptidase inhibitor, clade A (alpha-1 antiproteinase, antitrypsin), member 10 (SERPINA10), mRNA OS=Homo sapiens PE=2 SV=1 - [B2RBZ5_HUMAN]	42.12	1	16	80	444	50.6422	8.51416	1.22081	1.06006	0.581649	0.954172	1.24945	1.02751	0.950231	1.07573	0.887	0.596865
Q9Y4G6	Talin-2 OS=Homo sapiens GN=TLN2 PE=1 SV=4 - [TLN2_HUMAN]	8.14	2	23	83	2542	271.443	5.56689	0.990536	1.08257	1.35645	1.14318	0.582346	0.984498	0.937944	0.834929	1.3692	0.140343
P05154	Plasma serine protease inhibitor OS=Homo sapiens GN=SERPINA5 PE=1 SV=3 - [IPSP_HUMAN]	33.25	14	14	95	406	45.6457	9.26123	1.32131	1.17438	1.08804	1.19458	1.14881	1.07106	1.09594	1.10527	1.0808	0.281739
D6R934	Complement C1q subcomponent subunit B OS=Homo sapiens GN=C1QB PE=1 SV=1 - [D6R934_HUMAN]	30.68	7	7	69	251	26.4424	8.63135	0.876268	1.09703	0.577565	0.850289	1.17184	1.33308	1.12747	1.2108	0.702255	0.0914068
A0A0R7FJH5	Coagulation factor XII OS=Homo sapiens GN=F12 PE=3 SV=1 - [A0A0R7FJH5_HUMAN]	44.55	1	25	136	615	67.8169	7.79639	0.946172	0.809083	1.1982	0.984484	1.03566	1.11288	0.978532	1.04236	0.944477	0.655887
A0A024CIM4	Carboxylic ester hydrolase OS=Homo sapiens PE=3 SV=1 - [A0A024CIM4_HUMAN]	27.74	17	17	86	602	68.3902	7.21045	1.00107	1.17049	0.983868	1.05181	1.04971	0.906804	0.92798	0.961499	1.09393	0.291323
P02747	Complement C1q subcomponent subunit C OS=Homo sapiens GN=C1QC PE=1 SV=3 - [C1QC_HUMAN]	25.31	5	5	48	245	25.7571	8.41162	0.823922	1.12153	0.452724	0.799392	1.20301	1.46457	1.1374	1.26833	0.630273	0.0975851
P15169	Carboxypeptidase N catalytic chain OS=Homo sapiens GN=CPN1 PE=1 SV=1 - [CBPN_HUMAN]	38.86	13	13	97	458	52.2533	7.34229	1.15132	1.0069	1.07486	1.07769	1.10861	0.975503	0.946741	1.01028	1.06672	0.358328
P43251	Biotinidase OS=Homo sapiens GN=BTD PE=1 SV=2 - [BTD_HUMAN]	23.39	10	10	62	543	61.0933	6.25244	1.05685	1.12764	0.927576	1.03736	1.10842	0.926631	0.952706	0.995919	1.04161	0.638123
P05090	Apolipoprotein D OS=Homo sapiens GN=APOD PE=1 SV=1 - [APOD_HUMAN]	33.33	7	7	71	189	21.2618	5.14795	0.990145	0.83978	0.824034	0.884653	1.03296	0.918987	0.918622	0.956855	0.924543	0.330213
P04075	Fructose-bisphosphate aldolase A OS=Homo sapiens GN=ALDOA PE=1 SV=2 - [ALDOA_HUMAN]	50.82	15	20	85	364	39.3953	8.08936	0.963882	0.999648	1.38956	1.1177	0.659422	1.00169	0.90202	0.854376	1.3082	0.196403
O43707	Alpha-actinin-4 OS=Homo sapiens GN=ACTN4 PE=1 SV=2 - [ACTN4_HUMAN]	28.54	9	25	89	911	104.788	5.43994	0.913957	1.02647	1.32108	1.08717	0.58701	0.908972	1.03941	0.84513	1.2864	0.252407
Q9Y6R7	IgGFc-binding protein OS=Homo sapiens GN=FCGBP PE=1 SV=3 - [FCGBP_HUMAN]	12.12	38	38	90	5405	571.639	5.33838	1.17525	1.04848	0.914304	1.04601	1.31335	0.885113	1.03712	1.07853	0.96985	0.834927
P02656	Apolipoprotein C-III OS=Homo sapiens GN=APOC3 PE=1 SV=1 - [APOC3_HUMAN]	46.46	3	3	36	99	10.8455	5.41455	0.5984	0.85198	0.82847	0.759617	0.783596	0.687817	0.699005	0.723472	1.04996	0.69705
A0A1S5UZ39	Hemoglobin subunit alpha OS=Homo sapiens GN=HBA2 PE=2 SV=1 - [A0A1S5UZ39_HUMAN]	73.8	7	9	75	187	20.1333	8.89502	0.337662	0.220696	0.250808	0.269722	0.744041	1.33402	2.82105	1.63304	0.165166	0.0923761
B2RA39	cDNA, FLJ94686, highly similar to Homo sapiens complement factor H-related 5 (CFHL5), mRNA OS=Homo sapiens PE=2 SV=1 - [B2RA39_HUMAN]	24.78	14	15	78	569	64.349	7.06396	1.01329	1.07676	1.13524	1.07509	1.16071	0.894588	1.07473	1.04334	1.03043	0.730554
P23528	Cofilin-1 OS=Homo sapiens GN=CFL1 PE=1 SV=3 - [COF1_HUMAN]	78.31	14	15	75	166	18.4907	8.08936	0.928712	0.994817	1.33222	1.08525	0.548183	1.06539	0.872818	0.828798	1.30943	0.260706
P13796	Plastin-2 OS=Homo sapiens GN=LCP1 PE=1 SV=6 - [PLSL_HUMAN]	47.69	20	25	77	627	70.2439	5.42725	1.12217	1.04268	0.947489	1.03745	1.02987	1.01277	0.99481	1.01249	1.02465	0.653228
S6AWF4	IgG L chain OS=Homo sapiens PE=2 SV=1 - [S6AWF4_HUMAN]	32.78	1	5	43	180	19.83	7.09326	0.848693	0.726902	0.84725	0.807615	0.776871	1.34121	1.09873	1.07227	0.753182	0.191053
Q04756	Hepatocyte growth factor activator OS=Homo sapiens GN=HGFAC PE=1 SV=1 - [HGFA_HUMAN]	26.56	16	16	94	655	70.6361	7.23975	1.00746	1.0984	1.10596	1.07061	1.10623	0.964072	0.887861	0.986054	1.08575	0.301795
M0R2W8	N-acetylmuramoyl-L-alanine amidase (Fragment) OS=Homo sapiens GN=PGLYRP2 PE=1 SV=2 - [M0R2W8_HUMAN]	30.94	1	3	35	181	19.5322	6.66846	1.33213	1.00292	0.990223	1.10842	0.969229	1.21849	0.856742	1.01482	1.09224	0.577915
P11021	78 kDa glucose-regulated protein OS=Homo sapiens GN=HSPA5 PE=1 SV=2 - [GRP78_HUMAN]	46.18	23	26	83	654	72.2884	5.16064	1.01805	1.08685	1.16912	1.09134	0.758188	0.948848	0.949562	0.885533	1.23241	0.0560575
Q9UGM5	Fetuin-B OS=Homo sapiens GN=FETUB PE=1 SV=2 - [FETUB_HUMAN]	37.96	14	14	80	382	42.028	6.82959	1.06127	1.02786	1.0711	1.05341	1.04753	1.03389	1.06558	1.049	1.0042	0.796415
P11226	Mannose-binding protein C OS=Homo sapiens GN=MBL2 PE=1 SV=2 - [MBL2_HUMAN]	43.15	9	9	62	248	26.127	5.49072	1.23957	1.10872	0.872548	1.07361	1.16146	0.959521	1.00766	1.04288	1.02947	0.815678
P01034	Cystatin-C OS=Homo sapiens GN=CST3 PE=1 SV=1 - [CYTC_HUMAN]	34.25	4	4	45	146	15.7891	8.74854	1.153	1.0126	1.09793	1.08784	1.1161	1.03505	1.067	1.07272	1.0141	0.764437
Q9NZP8	Complement C1r subcomponent-like protein OS=Homo sapiens GN=C1RL PE=1 SV=2 - [C1RL_HUMAN]	29.77	2	13	79	487	53.4643	7.1958	1.20083	1.06629	0.876619	1.04791	1.13258	1.08668	1.00796	1.07574	0.974132	0.796245
K7ENT6	Tropomyosin alpha-4 chain (Fragment) OS=Homo sapiens GN=TPM4 PE=1 SV=1 - [K7ENT6_HUMAN]	69.27	1	15	93	179	20.6084	4.61475	1.00462	0.979705	1.48503	1.15645	0.540573	0.863574	0.915821	0.773323	1.49544	0.13077
Q6U2L6	C4B (Fragment) OS=Homo sapiens GN=C4B PE=4 SV=1 - [Q6U2L6_HUMAN]	76	1	6	96	100	10.2462	6.52197	1.1726	0.80163	1.2699	1.08138	1.16342	0.786671	1.01443	0.988172	1.09432	0.631682
P14618	Pyruvate kinase PKM OS=Homo sapiens GN=PKM PE=1 SV=4 - [KPYM_HUMAN]	59.32	26	26	69	531	57.9	7.84033	0.981091	1.11279	1.31073	1.13487	0.617412	1.09229	0.866899	0.858866	1.32136	0.174314
A0A0U1RR20	Proteoglycan 4 OS=Homo sapiens GN=PRG4 PE=1 SV=1 - [A0A0U1RR20_HUMAN]	19.25	27	27	127	1361	146.361	9.46631	1.09183	1.00923	1.17526	1.09211	1.04357	0.952125	0.994933	0.996876	1.09553	0.156821
P08567	Pleckstrin OS=Homo sapiens GN=PLEK PE=1 SV=3 - [PLEK_HUMAN]	39.14	10	10	60	350	40.0994	8.27979	0.859564	1.04496	1.26043	1.05499	0.578637	1.0342	0.8913	0.834713	1.26389	0.282461
P0CG39	POTE ankyrin domain family member J OS=Homo sapiens GN=POTEJ PE=3 SV=1 - [POTEJ_HUMAN]	6.07	1	5	42	1038	117.315	5.97314	0.812085	0.959178	0.98514	0.918801	0.794963	1.1572	0.927703	0.959955	0.95713	0.746355
Q6FHW3	DF protein OS=Homo sapiens GN=DF PE=2 SV=1 - [Q6FHW3_HUMAN]	58.33	9	9	41	228	24.4074	7.23975	1.08327	0.869591	0.800612	0.917825	1.24053	1.00993	1.15884	1.13643	0.807637	0.114443
P62258	14-3-3 protein epsilon OS=Homo sapiens GN=YWHAE PE=1 SV=1 - [1433E_HUMAN]	46.27	8	11	50	255	29.1554	4.7417	1.02212	1.05759	1.18807	1.08926	0.597662	0.993287	0.974305	0.855084	1.27387	0.165789
P00748	Coagulation factor XII OS=Homo sapiens GN=F12 PE=1 SV=3 - [FA12_HUMAN]	44.55	1	25	124	615	67.7479	7.73779	1.66226	0.921094	0.596541	1.05996	1.22066	0.584852	1.21789	1.0078	1.05176	0.897375
I3L145	Sex hormone-binding globulin OS=Homo sapiens GN=SHBG PE=1 SV=1 - [I3L145_HUMAN]	55.52	14	14	71	344	37.4643	6.22705	1.56186	0.79006	1.0299	1.12727	1.18404	1.05832	0.829581	1.02398	1.10087	0.701292
Q9H804	cDNA FLJ14022 fis, clone HEMBA1003538, weakly similar to COMPLEMENT C1R COMPONENT (EC 3.4.21.41) OS=Homo sapiens PE=2 SV=1 - [Q9H804_HUMAN]	26.71	1	11	69	438	47.9638	7.45947	1.19433	1.23095	0.281718	0.902333	1.01383	1.40722	1.13196	1.18434	0.761887	0.443041
B2R888	Monocyte differentiation antigen CD14 OS=Homo sapiens PE=2 SV=1 - [B2R888_HUMAN]	36.27	11	11	51	375	40.0227	6.22705	1.17246	1.00703	1.06312	1.08087	1.09427	0.940043	1.02913	1.02115	1.05848	0.416778
S6B2A6	IgG H chain OS=Homo sapiens PE=2 SV=1 - [S6B2A6_HUMAN]	16.67	1	5	41	300	32.1469	7.25439	0.955868	0.866042	0.952241	0.924717	1.06824	1.48638	0.970872	1.17516	0.786883	0.194411
P00915	Carbonic anhydrase 1 OS=Homo sapiens GN=CA1 PE=1 SV=2 - [CAH1_HUMAN]	59.39	5	12	73	261	28.8524	7.12256	1.02832	0.974235	0.864944	0.955832	1.02854	1.07409	1.33604	1.14622	0.833899	0.150348
A8K2W3	cDNA FLJ78516 OS=Homo sapiens PE=2 SV=1 - [A8K2W3_HUMAN]	39.76	16	16	60	425	47.0726	5.24951	0.996633	1.05031	1.3177	1.12155	0.522909	0.928839	0.900363	0.784037	1.43048	0.109065
V9HW25	Epididymis secretory protein Li 273 OS=Homo sapiens GN=HEL-S-273 PE=2 SV=1 - [V9HW25_HUMAN]	53.17	7	20	83	284	32.9696	4.66553	0.751353	0.926105	1.27475	0.984069	0.54733	0.990269	1.19261	0.910069	1.08131	0.777587
O75636	Ficolin-3 OS=Homo sapiens GN=FCN3 PE=1 SV=2 - [FCN3_HUMAN]	48.83	12	12	59	299	32.882	6.66846	1.14785	0.946621	0.740116	0.944861	1.1825	1.15805	0.922382	1.08764	0.868722	0.377505
P26038	Moesin OS=Homo sapiens GN=MSN PE=1 SV=3 - [MOES_HUMAN]	48.53	25	34	87	577	67.7778	6.40479	0.972009	1.0295	1.34144	1.11432	0.588531	0.98325	0.855172	0.808984	1.37743	0.13499
P11142	Heat shock cognate 71 kDa protein OS=Homo sapiens GN=HSPA8 PE=1 SV=1 - [HSP7C_HUMAN]	41.02	19	24	70	646	70.8542	5.51611	0.973052	1.0269	1.36409	1.12135	0.611333	0.984304	0.992685	0.862774	1.2997	0.214555
P22891	Vitamin K-dependent protein Z OS=Homo sapiens GN=PROZ PE=1 SV=2 - [PROZ_HUMAN]	32.25	11	11	55	400	44.7147	5.97314	1.11874	0.993084	1.09381	1.06854	0.987464	0.888789	1.00223	0.959495	1.11365	0.10578
P27918	Properdin OS=Homo sapiens GN=CFP PE=1 SV=2 - [PROP_HUMAN]	35.82	15	15	80	469	51.242	7.89893	1.04408	1.0347	0.947856	1.00888	1.02205	1.25351	0.984779	1.08678	0.928322	0.433043
Q96IY4	Carboxypeptidase B2 OS=Homo sapiens GN=CPB2 PE=1 SV=2 - [CBPB2_HUMAN]	38.3	15	15	68	423	48.3934	7.7085	1.14489	0.944429	1.01198	1.03377	1.2845	0.98798	1.02391	1.0988	0.940819	0.587627
P19652	Alpha-1-acid glycoprotein 2 OS=Homo sapiens GN=ORM2 PE=1 SV=2 - [A1AG2_HUMAN]	31.84	4	6	51	201	23.5876	5.10986	0.697896	0.375519	0.36146	0.478292	0.683642	0.60673	0.581918	0.624097	0.766374	0.270289
Q1HP67	Lipoprotein, Lp(A) OS=Homo sapiens GN=LPA PE=3 SV=1 - [Q1HP67_HUMAN]	29.12	21	21	57	2040	226.369	6.07471	1.10136	0.62591	1.50264	1.07664	0.588799	0.534498	1.53598	0.886424	1.21458	0.668472
O75083	WD repeat-containing protein 1 OS=Homo sapiens GN=WDR1 PE=1 SV=4 - [WDR1_HUMAN]	30.53	1	20	61	606	66.1519	6.65381	1.13534	0.912694	1.12538	1.0578	0.876481	1.13482	1.12501	1.04544	1.01183	0.916969
Q53GN4	WD repeat domain 1, isoform CRA_a (Fragment) OS=Homo sapiens GN=WDR1 PE=2 SV=1 - [Q53GN4_HUMAN]	30.53	1	20	62	606	66.1379	6.65381	1.07159	0.841617	1.15417	1.02246	0.93892	0.960579	0.955762	0.951754	1.07429	0.492669
P07900	Heat shock protein HSP 90-alpha OS=Homo sapiens GN=HSP90AA1 PE=1 SV=5 - [HS90A_HUMAN]	29.92	9	22	56	732	84.6067	5.021	0.969146	0.968912	1.20142	1.04649	0.688913	0.986249	1.02408	0.899746	1.1631	0.326223
G3XAP6	Cartilage oligomeric matrix protein OS=Homo sapiens GN=COMP PE=1 SV=1 - [G3XAP6_HUMAN]	41.02	22	23	46	724	79.646	4.61475	1.03937	1.07433	0.916005	1.0099	1.0071	0.99388	0.949075	0.983353	1.027	0.631001
B3KQT9	Protein disulfide-isomerase OS=Homo sapiens PE=2 SV=1 - [B3KQT9_HUMAN]	45.63	16	21	59	480	54.0685	7.21045	0.928684	0.961765	1.31929	1.06991	0.619236	0.980741	0.974649	0.858209	1.24668	0.288136
B7Z7M2	cDNA FLJ51564, highly similar to Pregnancy zone protein OS=Homo sapiens PE=2 SV=1 - [B7Z7M2_HUMAN]	50.74	1	7	44	136	14.9596	5.10986	0.840014	1.24839	0.670915	0.919772	0.738741	0.790775	1.03399	0.854501	1.07638	0.753515
A6XND1	Insulin-like growth factor binding protein 3 isoform b OS=Homo sapiens GN=IGFBP3 PE=1 SV=1 - [A6XND1_HUMAN]	42.21	10	10	69	263	28.9611	8.45557	0.958914	1.05144	1.07107	1.02714	1.12295	0.954934	0.955716	1.0112	1.01576	0.820284
A0A109PW65	GCT-A3 light chain variable region (Fragment) OS=Homo sapiens PE=2 SV=1 - [A0A109PW65_HUMAN]	31.78	1	2	23	107	11.6197	8.47021	0.655144	0.897372	0.298467	0.616994	0.974106	1.06225	1.28113	1.10583	0.557948	0.067585
A0A0C4DFP6	Cartilage acidic protein 1 OS=Homo sapiens GN=CRTAC1 PE=1 SV=1 - [A0A0C4DFP6_HUMAN]	32.03	16	16	37	637	69.6632	5.2749	0.946484	1.08169	0.847642	0.958604	1.07091	0.919144	0.93976	0.976606	0.981567	0.838581
A0A087X1J7	Glutathione peroxidase OS=Homo sapiens GN=GPX3 PE=1 SV=1 - [A0A087X1J7_HUMAN]	28	6	6	46	225	25.386	8.1333	1.06846	1.03151	0.929927	1.00997	1.08155	1.02873	0.966903	1.02573	0.984635	0.781135
P00338	L-lactate dehydrogenase A chain OS=Homo sapiens GN=LDHA PE=1 SV=2 - [LDHA_HUMAN]	26.51	7	8	34	332	36.6654	8.26514	0.916736	1.01746	1.01036	0.981517	0.764465	1.06074	1.01296	0.946055	1.03748	0.734228
Q8TCF0	LBP protein OS=Homo sapiens GN=LBP PE=2 SV=1 - [Q8TCF0_HUMAN]	28.93	10	10	32	477	52.9007	6.75635	1.14579	1.10262	0.955005	1.0678	1.27805	1.06483	1.17248	1.17179	0.911263	0.285461
O00391	Sulfhydryl oxidase 1 OS=Homo sapiens GN=QSOX1 PE=1 SV=3 - [QSOX1_HUMAN]	34.81	24	24	62	747	82.5255	8.92432	1.11441	1.02378	1.06389	1.06736	1.1322	1.01721	0.961982	1.03713	1.02915	0.621476
D3DPU2	Adenylyl cyclase-associated protein OS=Homo sapiens GN=CAP1 PE=2 SV=1 - [D3DPU2_HUMAN]	42.11	5	18	60	475	51.6406	8.01611	0.949162	1.04358	1.50331	1.16535	0.602381	1.00357	0.927207	0.844386	1.38011	0.202473
P52566	Rho GDP-dissociation inhibitor 2 OS=Homo sapiens GN=ARHGDIB PE=1 SV=3 - [GDIR2_HUMAN]	65.17	10	10	44	201	22.9736	5.21143	0.943582	1.02222	1.2224	1.06273	0.64436	1.01961	0.914252	0.859408	1.23659	0.21788
U3PXP0	Alpha globin chain (Fragment) OS=Homo sapiens GN=HBA2 PE=3 SV=1 - [U3PXP0_HUMAN]	66.67	1	3	33	51	5.69882	7.51807	0.946076	0.902901	0.74805	0.865676	1.05403	1.0202	1.53997	1.20473	0.718563	0.130068
P00918	Carbonic anhydrase 2 OS=Homo sapiens GN=CA2 PE=1 SV=2 - [CAH2_HUMAN]	45.77	11	11	41	260	29.2279	7.40088	0.974791	1.00074	1.01621	0.997245	0.869528	0.997557	1.19323	1.0201	0.977592	0.821485
P04040	Catalase OS=Homo sapiens GN=CAT PE=1 SV=3 - [CATA_HUMAN]	42.13	19	19	53	527	59.7188	7.38623	0.953522	0.96304	0.981328	0.965963	0.99663	0.928668	1.22472	1.05001	0.91996	0.402812
P49908	Selenoprotein P OS=Homo sapiens GN=SELENOP PE=1 SV=3 - [SEPP1_HUMAN]	13.91	6	6	48	381	43.1563	7.86963	1.07282	0.9489	0.92496	0.982228	1.14803	1.05181	1.04592	1.08192	0.907856	0.152557
P19320	Vascular cell adhesion protein 1 OS=Homo sapiens GN=VCAM1 PE=1 SV=1 - [VCAM1_HUMAN]	25.17	18	18	43	739	81.2243	5.22412	1.32787	0.988523	0.89515	1.07051	1.25528	0.965299	0.895108	1.03856	1.03076	0.861329
P02763	Alpha-1-acid glycoprotein 1 OS=Homo sapiens GN=ORM1 PE=1 SV=1 - [A1AG1_HUMAN]	40.3	5	7	57	201	23.4968	5.021	0.646007	0.311701	0.296675	0.418128	0.43242	0.38473	0.459541	0.425564	0.982527	0.952005
B4DF70	cDNA FLJ60461, highly similar to Peroxiredoxin-2 (EC 1.11.1.15) OS=Homo sapiens PE=2 SV=1 - [B4DF70_HUMAN]	43.72	8	9	47	183	20.0946	8.77783	1.03002	1.08022	0.989773	1.03334	1.0574	0.926274	1.33661	1.10676	0.933661	0.585027
P33151	Cadherin-5 OS=Homo sapiens GN=CDH5 PE=1 SV=5 - [CADH5_HUMAN]	16.71	13	13	47	784	87.474	5.42725	1.19819	1.16574	0.965275	1.10973	1.05864	0.98404	0.875048	0.972576	1.14103	0.203235
V9HWK1	Triosephosphate isomerase OS=Homo sapiens GN=HEL-S-49 PE=2 SV=1 - [V9HWK1_HUMAN]	68.67	15	15	43	249	26.6527	6.90283	0.973866	1.05427	1.18053	1.06956	0.670962	1.05623	0.973968	0.900388	1.18788	0.268262
S4R460	Immunoglobulin heavy variable 3/OR16-9 (non-functional) OS=Homo sapiens GN=IGHV3OR16-9 PE=1 SV=2 - [S4R460_HUMAN]	40.63	1	3	23	96	10.423	7.97217	1.11386	0.792437	0.593345	0.833214	0.945552	1.05645	1.18834	1.06344	0.783505	0.240293
Q5CAQ5	Tumor rejection antigen (Gp96) 1 OS=Homo sapiens GN=TRA1 PE=2 SV=1 - [Q5CAQ5_HUMAN]	28.43	21	22	52	802	92.2823	4.85596	1.00651	1.02173	1.2407	1.08965	0.881357	0.919748	1.00836	0.936489	1.16355	0.144069
P00558	Phosphoglycerate kinase 1 OS=Homo sapiens GN=PGK1 PE=1 SV=3 - [PGK1_HUMAN]	43.17	16	16	34	417	44.5861	8.104	0.936588	1.00836	1.2762	1.07372	0.624285	1.02051	0.933513	0.859434	1.24933	0.247874
Q5T123	SH3 domain-binding glutamic acid-rich-like protein 3 OS=Homo sapiens GN=SH3BGRL3 PE=1 SV=1 - [Q5T123_HUMAN]	50	5	5	36	88	9.37476	9.36377	0.932963	0.886931	1.2055	1.00846	0.506143	0.972456	0.89305	0.79055	1.27565	0.281044
B4DQA0	L-selectin OS=Homo sapiens PE=2 SV=1 - [B4DQA0_HUMAN]	21.85	8	8	51	325	36.3182	6.22705	1.08651	1.04448	0.975892	1.03563	1.10385	0.948	0.941515	0.997789	1.03792	0.575158
A8K486	Peptidyl-prolyl cis-trans isomerase OS=Homo sapiens PE=2 SV=1 - [A8K486_HUMAN]	59.39	10	11	58	165	18.0018	6.90283	0.979256	1.02418	1.21411	1.07252	0.617092	1.02739	0.970424	0.871635	1.23046	0.243907
B7Z538	cDNA FLJ60766, highly similar to Hepatocyte growth factor-like protein OS=Homo sapiens PE=2 SV=1 - [B7Z538_HUMAN]	29.88	1	7	25	338	36.789	8.48486	1.16801	1.02462	1.14198	1.11153	1.17754	0.840258	0.964392	0.994062	1.11817	0.33753
B4DRR0	cDNA FLJ53910, highly similar to Keratin, type II cytoskeletal 6A OS=Homo sapiens PE=2 SV=1 - [B4DRR0_HUMAN]	32.34	7	20	50	535	57.8032	8.00146	1.22149	0.89276	0.628572	0.914273	1.12514	0.9857	1.30639	1.13908	0.802644	0.313209
P61981	14-3-3 protein gamma OS=Homo sapiens GN=YWHAG PE=1 SV=2 - [1433G_HUMAN]	59.92	9	14	48	247	28.2849	4.89404	1.00143	1.04514	1.23692	1.0945	0.552637	0.996978	0.948685	0.832767	1.31429	0.173486
H7BYY1	Tropomyosin 1 (Alpha), isoform CRA_m OS=Homo sapiens GN=TPM1 PE=1 SV=1 - [H7BYY1_HUMAN]	50.81	6	15	39	248	28.7296	4.81787	0.942222	0.926348	1.42459	1.09772	0.513483	0.973224	1.00732	0.831343	1.32042	0.30798
F5GZZ9	Scavenger receptor cysteine-rich type 1 protein M130 OS=Homo sapiens GN=CD163 PE=1 SV=1 - [F5GZZ9_HUMAN]	17.94	18	18	39	1109	120.244	6.1001	1.15062	1.04142	1.11723	1.10309	1.14962	1.02236	0.959075	1.04368	1.05692	0.410333
O00151	PDZ and LIM domain protein 1 OS=Homo sapiens GN=PDLIM1 PE=1 SV=4 - [PDLI1_HUMAN]	26.14	9	9	25	329	36.049	7.02002	0.946648	1.01811	1.24403	1.0696	0.6288	0.986661	0.981388	0.865616	1.23565	0.241545
A0A1U9X8Y4	Chloride intracellular channel protein OS=Homo sapiens PE=3 SV=1 - [A0A1U9X8Y4_HUMAN]	52.5	9	9	27	240	26.7767	5.26221	0.939302	1.04583	1.27131	1.08548	0.635291	1.04986	0.893102	0.859418	1.26304	0.219713
B4DVE1	cDNA FLJ53478, highly similar to Galectin-3-binding protein OS=Homo sapiens PE=2 SV=1 - [B4DVE1_HUMAN]	23.73	12	12	40	573	64.0558	5.46533	1.16453	0.808111	0.982191	0.984945	1.07624	1.02261	0.912072	1.00364	0.981371	0.877344
A8KAJ3	cDNA FLJ77823, highly similar to Homo sapiens EGF-containing fibulin-like extracellular matrix protein 1, transcript variant 3, mRNA OS=Homo sapiens PE=2 SV=1 - [A8KAJ3_HUMAN]	38.74	15	15	40	493	54.6323	5.13525	1.30496	0.969685	1.03068	1.10177	1.1533	0.929498	1.08287	1.05522	1.04411	0.723171
J3KN67	Tropomyosin alpha-3 chain OS=Homo sapiens GN=TPM3 PE=1 SV=1 - [J3KN67_HUMAN]	47.37	1	18	65	285	33.2018	4.76709	0.87913	1.01242	1.17104	1.02086	0.615031	1.03021	0.971761	0.872335	1.17026	0.39158
P02745	Complement C1q subcomponent subunit A OS=Homo sapiens GN=C1QA PE=1 SV=2 - [C1QA_HUMAN]	23.27	4	4	32	245	26.0002	9.11475	0.808659	1.10461	0.521796	0.811688	1.2204	1.36295	1.14931	1.24422	0.652367	0.0736818
P06733	Alpha-enolase OS=Homo sapiens GN=ENO1 PE=1 SV=2 - [ENOA_HUMAN]	38.48	14	15	39	434	47.1393	7.38623	0.87878	0.885811	1.32564	1.03008	0.526014	1.12309	0.902896	0.850668	1.2109	0.476342
A0A024R5W6	Tropomyosin 1 (Alpha), isoform CRA_a OS=Homo sapiens GN=TPM1 PE=3 SV=1 - [A0A024R5W6_HUMAN]	44.37	4	16	42	284	32.6576	4.7417	0.881068	0.88042	1.37049	1.04399	0.58883	1.00644	0.975145	0.856806	1.21847	0.425903
Q15582	Transforming growth factor-beta-induced protein ig-h3 OS=Homo sapiens GN=TGFBI PE=1 SV=1 - [BGH3_HUMAN]	36.31	20	20	47	683	74.634	7.7085	1.14688	1.04314	0.886105	1.02537	1.22148	0.971743	0.973224	1.05548	0.971473	0.802046
B4DMA2	cDNA FLJ54023, highly similar to Heat shock protein HSP 90-beta OS=Homo sapiens PE=2 SV=1 - [B4DMA2_HUMAN]	24.2	3	17	38	686	79.1451	5.021	0.978587	0.97377	1.21565	1.056	0.880697	0.992766	0.999692	0.957718	1.10262	0.329796
B4DNL5	Protein disulfide-isomerase OS=Homo sapiens PE=2 SV=1 - [B4DNL5_HUMAN]	41.67	19	20	42	492	55.3466	4.79248	1.03213	1.02186	1.25978	1.10459	0.693014	0.972085	1.00615	0.890415	1.24053	0.164315
P13647	Keratin, type II cytoskeletal 5 OS=Homo sapiens GN=KRT5 PE=1 SV=3 - [K2C5_HUMAN]	33.05	10	23	56	590	62.34	7.73779	1.27799	1.09702	0.952197	1.10907	0.968722	1.00967	0.984839	0.987745	1.12283	0.270628
P04406	Glyceraldehyde-3-phosphate dehydrogenase OS=Homo sapiens GN=GAPDH PE=1 SV=3 - [G3P_HUMAN]	40.3	10	10	37	335	36.0304	8.45557	0.902922	0.965047	1.04127	0.969747	0.628487	1.04956	0.96364	0.880562	1.10128	0.543654
P31946	14-3-3 protein beta/alpha OS=Homo sapiens GN=YWHAB PE=1 SV=3 - [1433B_HUMAN]	55.28	5	13	46	246	28.0648	4.83057	0.978598	1.07109	1.30271	1.11746	0.655781	1.0482	0.943736	0.882572	1.26615	0.196808
B4DNA3	Adenylyl cyclase-associated protein OS=Homo sapiens PE=2 SV=1 - [B4DNA3_HUMAN]	35.1	1	14	37	433	47.0913	8.27979	0.934689	0.836504	0.768003	0.846399	0.71313	1.05737	1.61212	1.12754	0.750658	0.350645
P09172	Dopamine beta-hydroxylase OS=Homo sapiens GN=DBH PE=1 SV=3 - [DOPO_HUMAN]	32.41	16	16	32	617	69.0207	6.41748	1.08675	1.17316	0.899099	1.053	0.922188	0.970062	0.977272	0.956507	1.10088	0.308211
H7BYX6	Neural cell adhesion molecule 1 OS=Homo sapiens GN=NCAM1 PE=1 SV=2 - [H7BYX6_HUMAN]	24.55	15	15	38	725	80.2331	4.88135	1.10799	1.00025	0.937994	1.01541	1.13062	0.978561	0.938825	1.016	0.999418	0.994221
Q6UXB8	Peptidase inhibitor 16 OS=Homo sapiens GN=PI16 PE=1 SV=1 - [PI16_HUMAN]	26.35	10	10	36	463	49.4395	5.38916	1.19763	1.00074	0.916585	1.03832	1.10523	1.0192	1.00811	1.04418	0.994388	0.950528
B2R983	cDNA, FLJ94267, highly similar to Homo sapiens glutathione S-transferase omega 1 (GSTO1), mRNA OS=Homo sapiens PE=2 SV=1 - [B2R983_HUMAN]	39	11	11	40	241	27.521	6.59521	0.944446	1.08374	1.06309	1.03042	0.635374	1.07965	0.944117	0.88638	1.16251	0.356866
V9H1C1	Gelsolin exon 4 (Fragment) OS=Homo sapiens PE=4 SV=1 - [V9H1C1_HUMAN]	69.57	1	4	48	69	7.97411	5.78271	1.12659	1.00524	0.913295	1.01504	1.15688	0.935453	0.96616	1.0195	0.995631	0.964022
P01861	Immunoglobulin heavy constant gamma 4 OS=Homo sapiens GN=IGHG4 PE=1 SV=1 - [IGHG4_HUMAN]	21.41	2	6	38	327	35.9179	7.35693	1.17941	0.842634	0.932177	0.98474	1.03896	0.759362	1.06721	0.955178	1.03095	0.843847
B3KX75	cDNA FLJ44930 fis, clone BRAMY3015549, highly similar to Neural cell adhesion molecule L1-like protein (Fragment) OS=Homo sapiens PE=2 SV=1 - [B3KX75_HUMAN]	22.64	1	20	37	1113	124.679	6.16357	1.19333	0.969436	1.11199	1.09159	1.03045	0.713201	0.838478	0.86071	1.26824	0.110782
P10599	Thioredoxin OS=Homo sapiens GN=TXN PE=1 SV=3 - [THIO_HUMAN]	31.43	4	4	19	105	11.7297	4.91943	0.998786	1.04636	1.29653	1.11389	0.634403	0.989843	0.963432	0.862559	1.29138	0.162417
L7UYB8	Glycoprotein Ib alpha polypeptide G942 deletion mutant OS=Homo sapiens GN=GP1BA PE=2 SV=1 - [L7UYB8_HUMAN]	23.42	6	6	24	333	36.9494	5.63037	1.00444	1.131	0.923696	1.01971	0.928487	0.834432	1.03367	0.932198	1.09388	0.353109
A0N5G3	Rheumatoid factor G9 light chain (Fragment) OS=Homo sapiens GN=V-lambda-3 PE=2 SV=1 - [A0N5G3_HUMAN]	28.93	2	3	18	121	12.8893	6.52197	0.346875	0.353194	0.176783	0.292284	2.12058	0.828779	1.16052	1.36996	0.213352	0.0512783
Q04917	14-3-3 protein eta OS=Homo sapiens GN=YWHAH PE=1 SV=4 - [1433F_HUMAN]	60.16	9	13	40	246	28.201	4.84326	0.960082	0.998465	1.2867	1.08175	0.528664	0.998608	0.989956	0.839076	1.28921	0.262713
A0A075B6S2	Immunoglobulin kappa variable 2D-29 OS=Homo sapiens GN=IGKV2D-29 PE=3 SV=1 - [KVD29_HUMAN]	20	1	2	16	120	13.1347	7.12256	0.772354	0.746958	0.705223	0.741512	1.01706	0.784623	1.35998	1.05389	0.703597	0.136938
A0A087X0M8	Neural cell adhesion molecule L1-like protein OS=Homo sapiens GN=CHL1 PE=1 SV=1 - [A0A087X0M8_HUMAN]	20.75	1	20	37	1171	130.713	5.79541	1.07744	1.13526	1.06931	1.094	1.21446	0.767484	0.865953	0.9493	1.15243	0.350976
B7Z1N6	Fructose-bisphosphate aldolase OS=Homo sapiens PE=2 SV=1 - [B7Z1N6_HUMAN]	17.54	2	6	20	325	35.4011	7.06396	1.08812	1.02061	0.94109	1.01661	0.701662	1.01564	0.950965	0.889423	1.14299	0.291374
P02533	Keratin, type I cytoskeletal 14 OS=Homo sapiens GN=KRT14 PE=1 SV=4 - [K1C14_HUMAN]	27.33	5	13	41	472	51.5294	5.16064	1.3512	0.944743	0.90222	1.06605	1.10729	1.03133	1.07407	1.0709	0.995476	0.974911
A0A140T8Z8	Tenascin-X (Fragment) OS=Homo sapiens GN=TNXB PE=1 SV=1 - [A0A140T8Z8_HUMAN]	8.8	19	19	29	3296	358.438	5.13525	1.05001	1.05608	0.959045	1.02171	1.08295	0.994189	0.97084	1.01599	1.00563	0.907829
A0A087WZB5	Beta-parvin OS=Homo sapiens GN=PARVB PE=1 SV=1 - [A0A087WZB5_HUMAN]	31.14	7	7	24	289	33.2366	5.89697	0.974837	1.04055	1.38981	1.13506	0.556809	1.00164	0.966623	0.841692	1.34855	0.201785
P06702	Protein S100-A9 OS=Homo sapiens GN=S100A9 PE=1 SV=1 - [S10A9_HUMAN]	80.7	7	7	34	114	13.2335	6.12549	0.899275	0.799458	1.01241	0.903715	0.644214	1.13651	1.49121	1.09065	0.828605	0.501267
Q96AF9	ZYX protein (Fragment) OS=Homo sapiens GN=ZYX PE=2 SV=2 - [Q96AF9_HUMAN]	32.62	11	11	24	466	50.4398	7.50342	0.968624	1.10274	1.14284	1.0714	0.651844	1.01261	0.904673	0.856374	1.25109	0.145518
A0A1Z1VXF2	CD44 protein (Fragment) OS=Homo sapiens GN=CD44 PE=4 SV=1 - [A0A1Z1VXF2_HUMAN]	19.6	4	4	31	199	21.8483	4.80518	1.11745	1.00024	0.979402	1.03236	1.10331	0.985416	0.925448	1.00472	1.02751	0.703746
E5RIF9	Carbonic anhydrase 1 (Fragment) OS=Homo sapiens GN=CA1 PE=1 SV=1 - [E5RIF9_HUMAN]	66.22	1	8	30	148	16.3079	6.25244	0.956571	0.598698	1.22298	0.926082	1.04645	0.638116	1.30043	0.995002	0.930734	0.807245
A0A0C4DH25	Immunoglobulin kappa variable 3D-20 OS=Homo sapiens GN=IGKV3D-20 PE=3 SV=1 - [KVD20_HUMAN]	21.55	1	2	13	116	12.5072	4.58936	0.712339	0.715897	0.485647	0.637961	0.912191	1.03295	1.54617	1.16377	0.548184	0.0654305
B2RDW0	cDNA, FLJ96792, highly similar to Homo sapiens calmodulin 2 (phosphorylase kinase, delta) (CALM2), mRNA OS=Homo sapiens PE=2 SV=1 - [B2RDW0_HUMAN]	46.98	7	7	31	149	16.7668	4.22119	0.942523	1.04386	1.39579	1.12739	0.458787	1.05151	0.843284	0.784528	1.43703	0.196348
E7ENL6	Collagen alpha-3(VI) chain OS=Homo sapiens GN=COL6A3 PE=1 SV=2 - [E7ENL6_HUMAN]	11.25	25	25	35	2569	277.946	8.17725	1.14671	0.995607	0.952658	1.03166	1.19396	1.03402	1.01721	1.08173	0.953711	0.571999
B2R773	cDNA, FLJ93312, highly similar to Homo sapiens adipose most abundant gene transcript 1 (APM1), mRNA OS=Homo sapiens PE=2 SV=1 - [B2R773_HUMAN]	19.26	4	4	29	244	26.409	5.74463	1.0732	0.79478	1.05798	0.975318	1.29418	1.00804	1.04266	1.11496	0.874758	0.335485
Q6VFQ6	Hemoglobin beta chain (Fragment) OS=Homo sapiens GN=HBB PE=3 SV=1 - [Q6VFQ6_HUMAN]	57.14	1	2	11	42	4.51041	8.23584	0.688653	0.619099	0.69669	0.668147	0.811937	1.17682	1.96347	1.31741	0.507167	0.129359
Q6MZL2	Uncharacterized protein DKFZp686M0562 (Fragment) OS=Homo sapiens GN=DKFZp686M0562 PE=2 SV=1 - [Q6MZL2_HUMAN]	30.84	9	9	24	321	35.1196	5.97314	1.17601	1.0489	0.890837	1.03858	1.16025	0.999586	0.967132	1.04232	0.996411	0.972455
P08779	Keratin, type I cytoskeletal 16 OS=Homo sapiens GN=KRT16 PE=1 SV=4 - [K1C16_HUMAN]	22.41	2	10	36	473	51.2362	5.04639	1.28589	0.845878	0.824373	0.985382	1.1185	1.12035	1.03237	1.09041	0.903684	0.530571
Q6LDG4	Complement protein (Fragment) OS=Homo sapiens GN=C2 PE=4 SV=1 - [Q6LDG4_HUMAN]	30.16	2	3	20	63	7.1587	7.18115	1.05432	1.10003	1.03321	1.06252	1.24175	0.980497	1.04721	1.08982	0.974951	0.752499
E3UN46	Insulin-like growth factor II transcript variant 3 isoform 1 (Fragment) OS=Homo sapiens GN=IGF2 PE=2 SV=1 - [E3UN46_HUMAN]	22.94	2	2	23	109	12.0209	7.51807	0.985223	1.05681	1.00167	1.01457	1.11242	0.945242	0.959816	1.00583	1.00869	0.886845
P00441	Superoxide dismutase [Cu-Zn] OS=Homo sapiens GN=SOD1 PE=1 SV=2 - [SODC_HUMAN]	37.01	6	6	21	154	15.9259	6.12549	0.932163	0.99285	1.18861	1.03787	0.707775	1.04813	1.03054	0.928813	1.11742	0.464505
P33908	Mannosyl-oligosaccharide 1,2-alpha-mannosidase IA OS=Homo sapiens GN=MAN1A1 PE=1 SV=3 - [MA1A1_HUMAN]	23.74	15	15	36	653	72.9223	6.46826	1.10911	1.05384	0.936808	1.03325	1.16309	0.963317	1.03224	1.05288	0.981354	0.812606
P55072	Transitional endoplasmic reticulum ATPase OS=Homo sapiens GN=VCP PE=1 SV=4 - [TERA_HUMAN]	18.61	15	15	24	806	89.2657	5.26221	0.884702	1.05043	1.26055	1.06523	0.557132	0.992577	1.03932	0.863009	1.23432	0.342976
Q02985	Complement factor H-related protein 3 OS=Homo sapiens GN=CFHR3 PE=1 SV=2 - [FHR3_HUMAN]	19.7	4	7	36	330	37.2987	7.54736	1.43115	1.00099	1.58529	1.33914	1.2223	0.657353	0.882468	0.920708	1.45447	0.156007
B3KXZ9	cDNA FLJ46477 fis, clone THYMU3025118, highly similar to Cell surface glycoprotein MUC18 OS=Homo sapiens PE=2 SV=1 - [B3KXZ9_HUMAN]	28.63	11	11	25	531	58.9827	5.18604	1.14292	0.976643	0.931953	1.01717	1.07144	0.957014	0.971814	1.00009	1.01708	0.82775
Q9UE52	Apolipoprotein B-100 gene intron CI and flanking regions (Fragment) OS=Homo sapiens PE=4 SV=1 - [Q9UE52_HUMAN]	33.33	1	2	40	36	3.88296	5.0083	0.997701	1.14036	0.867464	1.00184	1.03994	0.950306	0.975205	0.988483	1.01351	0.880227
Q15404	Ras suppressor protein 1 OS=Homo sapiens GN=RSU1 PE=1 SV=3 - [RSU1_HUMAN]	49.82	12	12	32	277	31.5207	8.646	0.91969	1.0125	1.4432	1.12513	0.564007	1.00765	0.993578	0.855077	1.31582	0.281778
K7ERI9	Apolipoprotein C-I (Fragment) OS=Homo sapiens GN=APOC1 PE=1 SV=1 - [K7ERI9_HUMAN]	35.06	4	4	35	77	8.64167	6.7124	0.715822	0.807402	0.800036	0.77442	0.811885	0.687961	0.717319	0.739055	1.04785	0.498328
O00187	Mannan-binding lectin serine protease 2 OS=Homo sapiens GN=MASP2 PE=1 SV=4 - [MASP2_HUMAN]	18.37	11	11	27	686	75.6536	5.63037	1.10905	0.971471	1.12718	1.06923	1.12082	1.00023	0.95296	1.02467	1.04349	0.559523
A6XMH1	Transthyretin OS=Homo sapiens PE=2 SV=1 - [A6XMH1_HUMAN]	19.57	3	3	13	138	14.9475	5.75732	1.19614	1.00501	1.02675	1.07597	1.14308	0.908658	0.96617	1.00597	1.06958	0.492976
P18065	Insulin-like growth factor-binding protein 2 OS=Homo sapiens GN=IGFBP2 PE=1 SV=2 - [IBP2_HUMAN]	35.38	10	10	22	325	34.7912	7.50342	1.27926	0.752478	1	1.01058	1.08713	1.06017	0.967259	1.03819	0.973408	0.86849
Q6EMK4	Vasorin OS=Homo sapiens GN=VASN PE=1 SV=1 - [VASN_HUMAN]	12.93	7	7	21	673	71.6675	7.38623	1.07336	0.989716	1.0441	1.03572	1.04559	1.01725	1.00792	1.02359	1.01186	0.676328
P27348	14-3-3 protein theta OS=Homo sapiens GN=YWHAQ PE=1 SV=1 - [1433T_HUMAN]	34.69	3	9	35	245	27.7468	4.77979	1.01097	1.02448	1.18788	1.07444	0.668373	0.987725	0.928885	0.861661	1.24694	0.133855
P05109	Protein S100-A8 OS=Homo sapiens GN=S100A8 PE=1 SV=1 - [S10A8_HUMAN]	55.91	6	6	24	93	10.8276	7.03467	0.907597	0.853611	1.07272	0.944644	0.682945	1.14067	1.38583	1.06982	0.882996	0.593755
C0IMJ3	Periostin isoform thy6 OS=Homo sapiens PE=2 SV=1 - [C0IMJ3_HUMAN]	15.24	10	10	12	781	87.2169	7.94287	1.22565	1.03862	0.865454	1.04324	1.22906	1.00315	0.957645	1.06328	0.98115	0.88804
P41222	Prostaglandin-H2 D-isomerase OS=Homo sapiens GN=PTGDS PE=1 SV=1 - [PTGDS_HUMAN]	24.74	4	4	17	190	21.0153	7.79639	1.18787	0.956252	0.820327	0.988149	1.20297	1.04024	1.18222	1.14181	0.865423	0.265681
Q3ZCW2	Galectin-related protein OS=Homo sapiens GN=LGALSL PE=1 SV=2 - [LEGL_HUMAN]	33.72	5	5	12	172	18.9737	5.35107	0.943451	1.07065	1.19493	1.06968	0.558872	1.07882	0.934833	0.85751	1.24742	0.282873
B7Z832	cDNA FLJ51409, highly similar to Thrombospondin-4 OS=Homo sapiens PE=2 SV=1 - [B7Z832_HUMAN]	23.45	11	12	21	870	95.8867	4.64014	1.04055	1.17515	0.814957	1.01022	1.03511	1.00097	0.950674	0.995584	1.0147	0.898654
J3K000	PEPD protein OS=Homo sapiens GN=PEPD PE=2 SV=1 - [J3K000_HUMAN]	41.18	15	15	27	493	54.5469	5.99854	1.072	1.02208	1.04827	1.04745	0.978291	1.01313	0.912868	0.968098	1.08197	0.0724368
A0A024RAB6	Heparan sulfate proteoglycan 2 (Perlecan), isoform CRA_b OS=Homo sapiens GN=HSPG2 PE=4 SV=1 - [A0A024RAB6_HUMAN]	3.87	14	14	21	4346	463.723	6.50732	1.1568	0.949641	0.962011	1.02282	1.17709	0.955203	1.05788	1.06339	0.961844	0.684502
F5H265	Polyubiquitin-C (Fragment) OS=Homo sapiens GN=UBC PE=1 SV=1 - [F5H265_HUMAN]	45.64	3	3	16	149	16.8311	6.58057	0.946849	1.02221	1.02821	0.999088	0.816375	1.07543	1.11287	1.00156	0.997534	0.980871
A8K335	cDNA FLJ76254, highly similar to Homo sapiens gamma-glutamyl hydrolase (GGH), mRNA OS=Homo sapiens PE=2 SV=1 - [A8K335_HUMAN]	33.65	11	11	21	318	36.0243	7.41553	1.01875	1.09801	1.04355	1.05344	1.13974	0.994494	1.05593	1.06339	0.990639	0.846367
Q8NBP7	Proprotein convertase subtilisin/kexin type 9 OS=Homo sapiens GN=PCSK9 PE=1 SV=3 - [PCSK9_HUMAN]	15.46	10	10	20	692	74.2391	6.60986	1.10606	1.07077	0.896491	1.02444	1.09173	0.996453	0.91686	1.00168	1.02272	0.795521
O95445	Apolipoprotein M OS=Homo sapiens GN=APOM PE=1 SV=2 - [APOM_HUMAN]	46.81	8	8	23	188	21.2394	6.01123	0.935586	0.904882	0.901845	0.914104	1.07785	0.84579	0.779824	0.901155	1.01437	0.893739
B4DMH3	Coronin OS=Homo sapiens PE=2 SV=1 - [B4DMH3_HUMAN]	33.18	14	15	34	437	49.3471	7.02002	0.936064	1.02986	1.46018	1.14204	0.531753	0.945858	1.02478	0.834131	1.36913	0.238252
P31146	Coronin-1A OS=Homo sapiens GN=CORO1A PE=1 SV=4 - [COR1A_HUMAN]	31.89	14	15	34	461	50.9938	6.68311	0.929629	1.00571	1.31247	1.0826	0.543036	0.979938	0.996519	0.839831	1.28907	0.268397
Q15084	Protein disulfide-isomerase A6 OS=Homo sapiens GN=PDIA6 PE=1 SV=1 - [PDIA6_HUMAN]	29.09	8	8	12	440	48.0913	5.08447	0.972309	1.05279	1.12096	1.04869	0.606163	1.0129	0.966576	0.861881	1.21674	0.240212
B4DXW1	Actin-related protein 3 OS=Homo sapiens GN=ACTR3 PE=1 SV=1 - [B4DXW1_HUMAN]	33.51	10	10	21	367	41.9773	5.61768	0.939277	1.06917	1.1986	1.06901	0.545154	0.988216	0.966142	0.833171	1.28307	0.220144
P58546	Myotrophin OS=Homo sapiens GN=MTPN PE=1 SV=2 - [MTPN_HUMAN]	38.14	3	3	10	118	12.8866	5.51611	0.942877	1.07679	1.26827	1.09598	0.635219	0.998166	0.915962	0.849782	1.28972	0.164471
A0A0A0MSI0	Peroxiredoxin-1 (Fragment) OS=Homo sapiens GN=PRDX1 PE=1 SV=1 - [A0A0A0MSI0_HUMAN]	42.11	7	8	18	171	18.9637	6.91748	1.02891	1.02668	1.31009	1.12189	0.71091	0.969231	1.18658	0.955574	1.17405	0.374638
A8K430	Fructose-bisphosphate aldolase OS=Homo sapiens PE=2 SV=1 - [A8K430_HUMAN]	33.24	12	13	21	364	39.4471	8.20654	0.811492	1.00138	0.713188	0.84202	1.01451	1.08596	0.79167	0.964046	0.873423	0.375591
Q14019	Coactosin-like protein OS=Homo sapiens GN=COTL1 PE=1 SV=3 - [COTL1_HUMAN]	66.2	9	9	29	142	15.935	5.66846	1.02894	1.01835	1.25026	1.09918	0.579225	0.988349	1.06541	0.877662	1.2524	0.259527
Q53G71	Calreticulin variant (Fragment) OS=Homo sapiens PE=2 SV=1 - [Q53G71_HUMAN]	44.33	14	14	31	406	46.8901	4.44971	1.02562	1.00199	1.29258	1.10673	0.617114	0.958957	0.974655	0.850242	1.30167	0.16093
B7Z6F3	cDNA FLJ56245, highly similar to Homo sapiens bridging integrator 2 (BIN2), mRNA OS=Homo sapiens PE=2 SV=1 - [B7Z6F3_HUMAN]	17.81	9	9	18	539	59.1513	4.98291	0.957626	0.914936	1.42815	1.10024	0.663468	0.983022	1.03054	0.892342	1.23298	0.358982
H7BZJ3	Protein disulfide-isomerase A3 (Fragment) OS=Homo sapiens GN=PDIA3 PE=1 SV=1 - [H7BZJ3_HUMAN]	53.66	1	6	19	123	13.5108	7.29834	0.959223	0.975246	1.20136	1.04528	0.660856	1.05312	0.865253	0.859744	1.2158	0.248925
P50395	Rab GDP dissociation inhibitor beta OS=Homo sapiens GN=GDI2 PE=1 SV=2 - [GDIB_HUMAN]	37.98	9	14	16	445	50.6309	6.46826	0.972772	1.09406	1.1286	1.06515	0.721302	0.997299	0.942819	0.88714	1.20065	0.139542
V9HWC6	Peptidyl-prolyl cis-trans isomerase OS=Homo sapiens GN=HEL-S-39 PE=2 SV=1 - [V9HWC6_HUMAN]	37.5	8	9	20	208	22.728	9.31982	0.930301	1.03532	1.41596	1.1272	0.572523	0.959522	0.914301	0.815449	1.3823	0.178952
P30041	Peroxiredoxin-6 OS=Homo sapiens GN=PRDX6 PE=1 SV=3 - [PRDX6_HUMAN]	46.43	11	11	21	224	25.0192	6.37939	0.992734	1.04036	0.975701	1.00293	0.700417	1.16194	0.993064	0.951809	1.05371	0.726453
A4D2D2	Procollagen C-endopeptidase enhancer OS=Homo sapiens GN=PCOLCE PE=4 SV=1 - [A4D2D2_HUMAN]	32.29	10	10	29	449	47.928	7.43018	1.06936	0.968621	1.00646	1.01481	1.20296	1.05698	1.01763	1.09252	0.928871	0.28865
P05362	Intercellular adhesion molecule 1 OS=Homo sapiens GN=ICAM1 PE=1 SV=2 - [ICAM1_HUMAN]	16.92	7	7	11	532	57.789	7.98682	1.11783	1.07666	0.848796	1.01443	1.21675	0.797681	0.971655	0.995362	1.01916	0.90343
P02741	C-reactive protein OS=Homo sapiens GN=CRP PE=1 SV=1 - [CRP_HUMAN]	24.55	6	6	24	224	25.0227	5.63037	0.841883	1.10106	0.431702	0.791548	0.724391	1.04141	3.47865	1.74815	0.452791	0.343743
P15144	Aminopeptidase N OS=Homo sapiens GN=ANPEP PE=1 SV=4 - [AMPN_HUMAN]	19.96	17	17	30	967	109.471	5.47803	1.12591	1.02952	1.0148	1.05674	1.00051	0.949634	0.965962	0.972034	1.08715	0.0893052
P52209	6-phosphogluconate dehydrogenase, decarboxylating OS=Homo sapiens GN=PGD PE=1 SV=3 - [6PGD_HUMAN]	16.77	8	8	12	483	53.106	7.2251	0.989404	1.05735	1.2215	1.08942	0.634241	1.03101	1.01759	0.894283	1.2182	0.255583
F8W020	Nucleosome assembly protein 1-like 1 (Fragment) OS=Homo sapiens GN=NAP1L1 PE=1 SV=1 - [F8W020_HUMAN]	43	7	7	12	207	24.3513	4.51318	0.906224	0.999984	1.23855	1.04825	0.554879	0.98897	0.929308	0.824386	1.27156	0.253644
C9J813	Caldesmon (Fragment) OS=Homo sapiens GN=CALD1 PE=1 SV=1 - [C9J813_HUMAN]	27.89	10	10	11	459	54.1265	5.71924	0.919823	0.951696	1.53552	1.13568	0.521948	1.00323	1.01571	0.846962	1.34089	0.325487
Q9HCC1	Single chain Fv (Fragment) OS=Homo sapiens PE=1 SV=1 - [Q9HCC1_HUMAN]	36.61	1	3	15	112	12.235	8.47021	0.980377	0.959207	0.80563	0.915071	1.19828	1.02537	0.997932	1.07386	0.852133	0.129828
P09211	Glutathione S-transferase P OS=Homo sapiens GN=GSTP1 PE=1 SV=2 - [GSTP1_HUMAN]	26.19	4	4	9	210	23.341	5.64307	0.984551	1.04997	1.03576	1.02342	0.644568	0.963634	0.933249	0.84715	1.20808	0.164046
B2R5G8	Serum amyloid A protein OS=Homo sapiens PE=2 SV=1 - [B2R5G8_HUMAN]	21.54	3	3	13	130	14.7983	8.98291	0.905696	0.876084	0.820717	0.867499	1.03353	0.851634	1.04315	0.976104	0.888736	0.180803
P62328	Thymosin beta-4 OS=Homo sapiens GN=TMSB4X PE=1 SV=2 - [TYB4_HUMAN]	56.82	3	3	22	44	5.04952	5.05908	0.688052	1.56241	1.38045	1.21031	0.440257	1.19735	0.860609	0.832738	1.4534	0.335048
P27487	Dipeptidyl peptidase 4 OS=Homo sapiens GN=DPP4 PE=1 SV=2 - [DPP4_HUMAN]	11.1	9	9	15	766	88.2225	6.03662	1.01368	1.11873	1.08905	1.07382	0.956137	1.00269	0.813178	0.924001	1.16214	0.0825799
A5YAK2	Apolipoprotein C-IV OS=Homo sapiens GN=APOC4 PE=2 SV=1 - [A5YAK2_HUMAN]	35.43	4	5	21	127	14.5704	9.12939	0.76418	0.941408	1.12125	0.942278	0.913136	0.801085	0.695485	0.803235	1.1731	0.313573
A0A1U9X7W4	HSPA1A OS=Homo sapiens PE=3 SV=1 - [A0A1U9X7W4_HUMAN]	17.32	6	10	22	641	69.995	5.65576	0.942121	0.990652	1.28544	1.07274	0.658249	0.992369	1.00571	0.885444	1.21152	0.296914
P62942	Peptidyl-prolyl cis-trans isomerase FKBP1A OS=Homo sapiens GN=FKBP1A PE=1 SV=2 - [FKB1A_HUMAN]	25	2	2	7	108	11.9431	8.1626	0.90178	0.993054	1.34795	1.08093	0.871871	1.02521	0.9416	0.946226	1.14236	0.399907
A8K6K4	cDNA FLJ77565, highly similar to Homo sapiens interleukin 1 receptor accessory protein (IL1RAP), transcript variant 1, mRNA OS=Homo sapiens PE=2 SV=1 - [A8K6K4_HUMAN]	12.81	8	8	16	570	65.3907	8.22119	1.13704	0.98126	1.01112	1.04314	1.05585	0.916457	0.959052	0.977119	1.06757	0.354365
Q15430	Coagulation factor V (Fragment) OS=Homo sapiens GN=F5 PE=2 SV=1 - [Q15430_HUMAN]	30.51	1	5	13	236	26.1288	5.47803	1.89749	1.62869	0.773163	1.43312	1.1223	0.749487	0.99655	0.956114	1.4989	0.251586
Q99497	Protein/nucleic acid deglycase DJ-1 OS=Homo sapiens GN=PARK7 PE=1 SV=2 - [PARK7_HUMAN]	49.74	8	8	22	189	19.8785	6.78564	1.00405	1.04884	1.26416	1.10568	0.677202	0.973189	0.907132	0.852508	1.29698	0.103294
B2R7D2	cDNA, FLJ93389, highly similar to Homo sapiens multiple inositol polyphosphate histidine phosphatase, 1 (MINPP1), mRNA OS=Homo sapiens PE=2 SV=1 - [B2R7D2_HUMAN]	24.02	10	10	21	487	55.0852	7.97217	1.14899	1.02066	1.0325	1.06738	1.10831	0.999691	0.96913	1.02571	1.04063	0.517784
B4DRV4	cDNA FLJ55667, highly similar to Secreted protein acidic and rich in cysteine OS=Homo sapiens PE=2 SV=1 - [B4DRV4_HUMAN]	32.08	7	7	25	212	24.6861	5.61768	0.919239	1.17021	1.37787	1.15577	0.618739	1.00513	0.826623	0.816829	1.41495	0.122198
B3KSS4	cDNA FLJ36858 fis, clone ASTRO2015185, highly similar to POLIOVIRUS RECEPTOR OS=Homo sapiens PE=2 SV=1 - [B3KSS4_HUMAN]	11.6	4	4	9	362	39.5547	6.66846	1.08828	1.22817	0.887611	1.06802	0.977995	0.965492	0.900786	0.948091	1.12649	0.303597
P48059	LIM and senescent cell antigen-like-containing domain protein 1 OS=Homo sapiens GN=LIMS1 PE=1 SV=4 - [LIMS1_HUMAN]	30.77	9	9	16	325	37.2258	8.04541	0.831338	0.980723	1.09587	0.96931	0.586486	1.09493	1.08942	0.923611	1.04948	0.817194
Q0ZCH5	Immunglobulin heavy chain variable region (Fragment) OS=Homo sapiens PE=4 SV=1 - [Q0ZCH5_HUMAN]	15.13	1	2	8	119	12.9625	8.83643	0.451826	0.395926	0.442547	0.4301	0.625515	1.05604	4.85941	2.18032	0.197264	0.263177
P00491	Purine nucleoside phosphorylase OS=Homo sapiens GN=PNP PE=1 SV=2 - [PNPH_HUMAN]	32.53	8	8	18	289	32.0972	6.94678	0.995893	1.03686	1.09185	1.04154	0.81314	1.08195	0.953164	0.949419	1.09703	0.32646
P54108	Cysteine-rich secretory protein 3 OS=Homo sapiens GN=CRISP3 PE=1 SV=1 - [CRIS3_HUMAN]	16.73	5	5	26	245	27.612	7.79639	1.09506	0.997848	0.929267	1.00739	1.09806	0.964106	0.966673	1.00961	0.997802	0.974534
Q14769	Alpha-N-acetylglucosaminidase OS=Homo sapiens GN=ufHSD2 PE=4 SV=1 - [Q14769_HUMAN]	8.61	4	4	7	639	71.9821	6.3667	1.03916	1.15373	0.987495	1.06013	0.986318	0.978254	0.772875	0.912483	1.1618	0.158839
B3GN61	Truncated E-cadherin OS=Homo sapiens GN=CDH1 PE=2 SV=1 - [B3GN61_HUMAN]	18.07	10	10	17	758	83.7706	4.89404	1.03935	1.08168	0.827145	0.982724	1.04989	1.26609	1.0094	1.10846	0.886568	0.324502
P37837	Transaldolase OS=Homo sapiens GN=TALDO1 PE=1 SV=2 - [TALDO_HUMAN]	23.44	8	8	12	337	37.5165	6.81494	1.02055	0.98743	1.25394	1.08731	0.680903	1.01609	0.940716	0.879235	1.23665	0.189235
B7ZLY3	LTBP1 protein OS=Homo sapiens GN=LTBP1 PE=2 SV=1 - [B7ZLY3_HUMAN]	6.13	6	6	10	1353	148.364	5.09717	0.903039	1.13441	1.39409	1.14384	0.641163	0.935357	1.06168	0.879399	1.30071	0.233861
Q9Y5Y7	Lymphatic vessel endothelial hyaluronic acid receptor 1 OS=Homo sapiens GN=LYVE1 PE=1 SV=2 - [LYVE1_HUMAN]	8.07	3	3	14	322	35.191	8.27979	1.12117	0.853454	0.993644	0.989424	1.22861	0.941176	0.999308	1.05636	0.936632	0.597682
B4E3A8	cDNA FLJ53963, highly similar to Leukocyte elastase inhibitor OS=Homo sapiens PE=2 SV=1 - [B4E3A8_HUMAN]	19.94	7	7	12	341	38.6607	6.66846	0.92318	1.03248	1.47123	1.1423	0.561785	1.0205	0.918504	0.833595	1.37033	0.229119
Q584P1	Uncharacterized protein PCYOX1 (Fragment) OS=Homo sapiens GN=PCYOX1 PE=4 SV=1 - [Q584P1_HUMAN]	19.85	7	7	16	398	45.1098	5.94775	0.875059	0.928305	0.896468	0.899944	1.10449	0.969578	0.900243	0.991435	0.907718	0.213629
P55058	Phospholipid transfer protein OS=Homo sapiens GN=PLTP PE=1 SV=1 - [PLTP_HUMAN]	9.13	4	4	9	493	54.7045	7.00537	1.04796	0.982842	0.977621	1.00281	1.1174	0.895245	0.969161	0.993936	1.00893	0.904078
B2R7T8	cDNA, FLJ93598, highly similar to Homo sapiens capping protein (actin filament) muscle Z-line, beta (CAPZB), mRNA OS=Homo sapiens PE=2 SV=1 - [B2R7T8_HUMAN]	24.63	6	6	12	272	30.6374	5.99854	0.948252	0.973097	1.33251	1.08462	0.668197	1.03902	1.08501	0.930743	1.16533	0.443534
H0YLF3	Beta-2-microglobulin (Fragment) OS=Homo sapiens GN=B2M PE=1 SV=1 - [H0YLF3_HUMAN]	28.17	2	2	16	71	8.49315	5.14795	1.20026	0.60775	1.10819	0.972067	1.26093	1.28151	1.15084	1.23109	0.789597	0.241373
P18669	Phosphoglycerate mutase 1 OS=Homo sapiens GN=PGAM1 PE=1 SV=2 - [PGAM1_HUMAN]	24.8	5	5	9	254	28.7858	7.18115	1.00724	0.939918	1.23612	1.06109	0.744953	0.984613	0.994421	0.907996	1.16861	0.275146
P81605	Dermcidin OS=Homo sapiens GN=DCD PE=1 SV=2 - [DCD_HUMAN]	42.73	7	7	13	110	11.2768	6.53662	0.9204	1.04365	0.698628	0.88756	0.956668	0.996584	1.01447	0.989241	0.897213	0.376842
Q12913	Receptor-type tyrosine-protein phosphatase eta OS=Homo sapiens GN=PTPRJ PE=1 SV=3 - [PTPRJ_HUMAN]	5.53	6	6	13	1337	145.851	5.57959	1.0853	1.04526	0.936374	1.02231	1.02714	0.988559	0.978014	0.997905	1.02446	0.63052
B4DPW9	cDNA FLJ51929, highly similar to Plastin-3 OS=Homo sapiens PE=2 SV=1 - [B4DPW9_HUMAN]	10.28	1	6	20	603	67.5566	5.65576	0.506693	1.36158	1.47757	1.11528	0.755962	0.874447	0.733436	0.787948	1.41542	0.349511
A0A024R5M3	Cortactin, isoform CRA_c OS=Homo sapiens GN=CTTN PE=4 SV=1 - [A0A024R5M3_HUMAN]	16.37	8	8	10	513	57.4315	5.32568	0.982725	1.05912	1.1939	1.07858	0.585378	1.04718	0.816447	0.816334	1.32125	0.1488
J3KTB5	Eukaryotic initiation factor 4A-I (Fragment) OS=Homo sapiens GN=EIF4A1 PE=1 SV=1 - [J3KTB5_HUMAN]	13.23	3	3	5	257	29.0629	5.08447	0.913704	1.03313	1.33151	1.09278	0.627946	1.0016	0.944623	0.858056	1.27355	0.239796
A0A0B4J1R6	Transketolase OS=Homo sapiens GN=TKT PE=1 SV=1 - [A0A0B4J1R6_HUMAN]	21.66	7	7	13	457	49.8789	7.91357	1.02293	1.03036	1.0965	1.04993	0.904386	0.989055	1.03151	0.974985	1.07687	0.164321
E7EX60	Neuropilin-1 OS=Homo sapiens GN=NRP1 PE=1 SV=1 - [E7EX60_HUMAN]	14.82	9	9	12	641	72.0474	6.78564	1.10796	0.947638	0.989099	1.0149	1.14118	1.05227	0.989408	1.06095	0.956592	0.518741
B7Z766	cDNA FLJ54564, highly similar to 150 kDa oxygen-regulated protein (Orp150) OS=Homo sapiens PE=2 SV=1 - [B7Z766_HUMAN]	14.27	10	10	15	848	94.1411	5.0083	1.12747	0.952503	0.897457	0.992478	1.09111	1.00132	1.04476	1.04573	0.949075	0.511708
Q13790	Apolipoprotein F OS=Homo sapiens GN=APOF PE=1 SV=2 - [APOF_HUMAN]	11.66	3	3	7	326	35.377	5.64307	1.14315	0.728971	0.698917	0.857013	1.08663	0.82477	0.947812	0.953071	0.899212	0.585259
A0A1U9WZ84	Insulin-like growth factor I (Fragment) OS=Homo sapiens PE=3 SV=1 - [A0A1U9WZ84_HUMAN]	50	3	3	6	70	7.64963	7.60596	0.965188	0.927117	1.05468	0.982328	0.984923	0.959887	1.03994	0.994917	0.987347	0.791709
Q16853	Membrane primary amine oxidase OS=Homo sapiens GN=AOC3 PE=1 SV=3 - [AOC3_HUMAN]	6.95	5	5	10	763	84.5683	6.52197	1.05059	1.01696	0.968446	1.012	1.07645	0.913087	1.01898	1.00284	1.00913	0.872251
B3KPS3	Tubulin alpha chain OS=Homo sapiens PE=2 SV=1 - [B3KPS3_HUMAN]	22.6	3	8	13	416	46.2118	5.12256	0.867385	1.04929	1.52911	1.1486	0.48101	1.10376	1.08326	0.889343	1.29151	0.413009
Q76LX8	A disintegrin and metalloproteinase with thrombospondin motifs 13 OS=Homo sapiens GN=ADAMTS13 PE=1 SV=1 - [ATS13_HUMAN]	5.05	6	6	8	1427	153.505	7.1665	1.08034	1.11848	0.955655	1.05149	0.928893	0.971565	0.950844	0.950434	1.10633	0.116949
B3KRY3	cDNA FLJ35079 fis, clone PLACE6005283, highly similar to Lysosome-associated membrane glycoprotein 1 OS=Homo sapiens PE=2 SV=1 - [B3KRY3_HUMAN]	6.84	3	3	6	395	42.5584	8.49951	0.962464	1.01607	0.978335	0.985624	1.17267	0.930875	0.946498	1.01668	0.969454	0.716728
Q14515	SPARC-like protein 1 OS=Homo sapiens GN=SPARCL1 PE=1 SV=2 - [SPRL1_HUMAN]	9.79	5	5	10	664	75.1613	4.80518	1.18133	0.900956	1.00833	1.03021	1.03007	1.03344	1.01001	1.02451	1.00556	0.947948
B9EJA8	Mannose receptor, C type 1-like 1 OS=Homo sapiens GN=MRC1L1 PE=2 SV=1 - [B9EJA8_HUMAN]	8.24	13	13	16	1456	165.918	6.50732	1.1543	0.971964	1.11672	1.08099	1.11165	0.980071	1.00412	1.03195	1.04753	0.514987
P40925	Malate dehydrogenase, cytoplasmic OS=Homo sapiens GN=MDH1 PE=1 SV=4 - [MDHC_HUMAN]	18.86	7	7	13	334	36.403	7.35693	0.951395	1.0852	1.25958	1.09873	0.683027	0.975309	0.905305	0.854547	1.28574	0.123341
B4E3Q4	Adenosine deaminase 2 OS=Homo sapiens GN=ADA2 PE=1 SV=1 - [B4E3Q4_HUMAN]	11.3	6	6	9	469	54.3248	8.14795	1.30508	0.989072	0.873193	1.05578	1.13205	0.999423	1.01442	1.04863	1.00682	0.960508
P08294	Extracellular superoxide dismutase [Cu-Zn] OS=Homo sapiens GN=SOD3 PE=1 SV=2 - [SODE_HUMAN]	30.42	5	5	8	240	25.8347	6.60986	1.02148	1.58038	0.736927	1.11293	1.10765	0.87358	0.927348	0.969527	1.14791	0.607492
Q9P1F3	Costars family protein ABRACL OS=Homo sapiens GN=ABRACL PE=1 SV=1 - [ABRAL_HUMAN]	65.43	3	3	6	81	9.05086	6.29053	0.951264	1.22868	1.01191	1.06395	0.502841	1.1258	0.903751	0.844131	1.26041	0.335123
B4DWQ5	cDNA FLJ51655, highly similar to Actin-like protein 2 OS=Homo sapiens PE=2 SV=1 - [B4DWQ5_HUMAN]	14.75	3	4	15	305	34.4859	5.71924	1.00978	1.03472	1.05647	1.03366	0.745336	1.01763	1.00114	0.921372	1.12187	0.276434
P04180	Phosphatidylcholine-sterol acyltransferase OS=Homo sapiens GN=LCAT PE=1 SV=1 - [LCAT_HUMAN]	10.91	4	4	10	440	49.5461	6.11279	0.959982	0.919248	0.909651	0.929627	1.05323	0.890064	0.874261	0.939183	0.989825	0.879678
Q9ULI3	Protein HEG homolog 1 OS=Homo sapiens GN=HEG1 PE=1 SV=3 - [HEG1_HUMAN]	4.56	5	5	9	1381	147.369	6.17627	1.1294	0.978924	0.94573	1.01802	1.08678	0.916378	1.02028	1.00781	1.01013	0.898578
J3QQX6	Intercellular adhesion molecule 2 (Fragment) OS=Homo sapiens GN=ICAM2 PE=1 SV=1 - [J3QQX6_HUMAN]	28.97	6	6	16	214	23.6618	6.50732	1.18226	1.11506	0.857068	1.05146	1.11366	1.01052	0.960614	1.02827	1.02256	0.841714
Q13201	Multimerin-1 OS=Homo sapiens GN=MMRN1 PE=1 SV=3 - [MMRN1_HUMAN]	5.21	4	4	7	1228	138.023	7.92822	0.891522	0.928095	1.10465	0.974755	0.950497	1.00724	1.19336	1.05036	0.928017	0.485682
P34096	Ribonuclease 4 OS=Homo sapiens GN=RNASE4 PE=1 SV=3 - [RNAS4_HUMAN]	35.37	5	5	11	147	16.8294	9.02686	1.1104	1.00453	0.989076	1.03467	1.12362	0.948677	1.09799	1.05676	0.979094	0.756584
A8K690	cDNA FLJ76863, highly similar to Homo sapiens stress-induced-phosphoprotein 1 (Hsp70/Hsp90-organizing protein) (STIP1), mRNA OS=Homo sapiens PE=2 SV=1 - [A8K690_HUMAN]	15.65	10	10	11	543	62.6154	6.80029	0.974219	1.01623	1.2321	1.07418	0.66685	1.01774	1.02319	0.902591	1.19011	0.294612
P52565	Rho GDP-dissociation inhibitor 1 OS=Homo sapiens GN=ARHGDIA PE=1 SV=3 - [GDIR1_HUMAN]	46.08	7	7	14	204	23.1927	5.10986	0.982974	1.0562	1.30138	1.11352	0.519902	1.00164	0.950131	0.82389	1.35154	0.183922
Q9BTY2	Plasma alpha-L-fucosidase OS=Homo sapiens GN=FUCA2 PE=1 SV=2 - [FUCO2_HUMAN]	8.35	4	4	5	467	54.0321	6.25244	1.06278	1.06557	0.986519	1.03829	1.13455	0.936787	1.02839	1.03324	1.00489	0.93973
A0A0S2Z4D8	Protein kinase C substrate 80K-H isoform 1 (Fragment) OS=Homo sapiens GN=PRKCSH PE=2 SV=1 - [A0A0S2Z4D8_HUMAN]	18.8	8	8	13	399	45.0963	4.32275	1.01136	0.954729	1.19879	1.05496	0.831408	0.9708	1.00031	0.934172	1.1293	0.251956
A0A024RDA6	Insulin-like growth factor binding protein 7, isoform CRA_a (Fragment) OS=Homo sapiens GN=IGFBP7 PE=4 SV=1 - [A0A024RDA6_HUMAN]	23.2	4	4	5	194	20.3383	8.54346	1.26216	0.809585	0.971614	1.01445	1.25914	0.998667	1.10592	1.12124	0.904758	0.522212
Q07954	Prolow-density lipoprotein receptor-related protein 1 OS=Homo sapiens GN=LRP1 PE=1 SV=2 - [LRP1_HUMAN]	2.75	12	12	13	4544	504.276	5.38916	1.14895	0.992167	1.06713	1.06942	1.09476	0.939786	0.949991	0.994846	1.07496	0.331153
A0A087X1X5	Calponin (Fragment) OS=Homo sapiens GN=CNN2 PE=1 SV=1 - [A0A087X1X5_HUMAN]	8.9	2	2	4	191	20.9452	8.86572	0.817431	1.11687	1.54576	1.16002	0.605811	1.02074	0.958211	0.861588	1.34638	0.29467
P31150	Rab GDP dissociation inhibitor alpha OS=Homo sapiens GN=GDI1 PE=1 SV=2 - [GDIA_HUMAN]	26.62	4	9	9	447	50.5501	5.13525	1.01542	1.0906	1.18813	1.09805	0.568006	1.07079	0.9453	0.861366	1.27478	0.211164
A0A0U2N547	Mast/stem cell growth factor receptor Kit isoform 3 OS=Homo sapiens GN=KIT PE=2 SV=1 - [A0A0U2N547_HUMAN]	5.87	6	6	7	971	109.294	6.88818	0.946302	1.02649	1.08678	1.01986	1.12127	0.996834	0.903822	1.00731	1.01246	0.87521
Q13418	Integrin-linked protein kinase OS=Homo sapiens GN=ILK PE=1 SV=2 - [ILK_HUMAN]	19.69	9	9	16	452	51.3859	8.07471	0.854519	0.995555	1.08432	0.97813	0.606553	1.0892	1.07345	0.923068	1.05965	0.76474
A2IPI6	HRV Fab 027-VL (Fragment) OS=Homo sapiens PE=2 SV=1 - [A2IPI6_HUMAN]	20.35	1	2	10	113	12.3752	9.40771	0.672624	0.62062	0.425871	0.573038	1.17738	1.00914	2.00439	1.39697	0.410201	0.0598954
C9JFR7	Cytochrome c (Fragment) OS=Homo sapiens GN=CYCS PE=1 SV=1 - [C9JFR7_HUMAN]	39.6	4	4	5	101	11.326	9.65674	0.974298	0.901568	1.1423	1.00606	0.754147	1.07348	0.926523	0.918051	1.09586	0.492427
A8K3B0	cDNA FLJ77877, highly similar to Human ENO2 neuron specific (gamma) enolase OS=Homo sapiens PE=2 SV=1 - [A8K3B0_HUMAN]	8.76	2	3	5	434	47.2831	5.03369	1.00518	1.10724	1.41157	1.17466	0.449617	0.971587	0.729547	0.716917	1.63849	0.0777251
P16930	Fumarylacetoacetase OS=Homo sapiens GN=FAH PE=1 SV=2 - [FAAA_HUMAN]	14.8	6	6	9	419	46.3442	6.94678	1.01875	1.04154	0.929609	0.996632	0.923305	1.04608	0.972665	0.980685	1.01626	0.762921
O60234	Glia maturation factor gamma OS=Homo sapiens GN=GMFG PE=1 SV=1 - [GMFG_HUMAN]	33.8	4	4	4	142	16.7904	5.26221	0.887206	1.06543	1.28899	1.08054	0.581458	1.03407	0.863254	0.826261	1.30775	0.221707
P26447	Protein S100-A4 OS=Homo sapiens GN=S100A4 PE=1 SV=1 - [S10A4_HUMAN]	36.63	5	5	15	101	11.7207	6.11279	0.976578	1.03807	1.35309	1.12258	0.597068	0.977511	0.930042	0.834874	1.34461	0.160231
A0A024R6Y5	Dipeptidase OS=Homo sapiens GN=DPEP2 PE=3 SV=1 - [A0A024R6Y5_HUMAN]	12.76	5	5	7	486	53.3313	6.53662	1.19811	1.04278	0.961278	1.06739	1.05042	0.975757	0.999662	1.00861	1.05828	0.465118
B4DG86	cDNA FLJ60487, highly similar to Macrophage colony-stimulating factor 1receptor (CSF-1-R) (EC 2.7.10.1) OS=Homo sapiens PE=2 SV=1 - [B4DG86_HUMAN]	9.62	2	2	5	343	37.4251	6.88818	1.0336	0.95365	0.649768	0.879005	1.12136	1.17184	0.88819	1.06046	0.828889	0.28166
O75144	ICOS ligand OS=Homo sapiens GN=ICOSLG PE=1 SV=2 - [ICOSL_HUMAN]	12.58	3	3	5	302	33.3277	5.31299	1.07166	1.0618	0.968244	1.0339	1.12647	0.963654	0.844417	0.978181	1.05696	0.561577
J3KPD9	NME1-NME2 readthrough OS=Homo sapiens GN=NME1-NME2 PE=1 SV=1 - [J3KPD9_HUMAN]	37.06	5	5	18	197	22.4077	9.53955	0.954588	1.07063	1.29556	1.10693	0.680634	0.992033	0.945566	0.872744	1.26833	0.1682
P13667	Protein disulfide-isomerase A4 OS=Homo sapiens GN=PDIA4 PE=1 SV=2 - [PDIA4_HUMAN]	16.12	10	10	13	645	72.887	5.07178	1.00894	1.0089	1.27935	1.09906	0.70852	1.00672	1.01293	0.90939	1.20857	0.232634
Q92859	Neogenin OS=Homo sapiens GN=NEO1 PE=1 SV=2 - [NEO1_HUMAN]	4.11	5	5	10	1461	159.917	6.53662	1.16615	0.981722	0.94107	1.02965	1.20943	1.03204	0.895927	1.0458	0.984558	0.894348
P40197	Platelet glycoprotein V OS=Homo sapiens GN=GP5 PE=1 SV=1 - [GPV_HUMAN]	10	5	5	8	560	60.9207	9.62744	0.779167	1.19027	1.15851	1.04265	0.867115	0.942998	0.921053	0.910389	1.14528	0.379416
A0A1B0GW44	Cathepsin D OS=Homo sapiens GN=CTSD PE=1 SV=1 - [A0A1B0GW44_HUMAN]	22.22	8	8	13	405	43.6602	6.53662	1.11628	1.05114	1.03478	1.0674	1.04385	1.02391	1.03957	1.03578	1.03053	0.284579
B4E2S7	cDNA FLJ58780, highly similar to Homo sapiens lysosomal-associated membrane protein 2 (LAMP2), transcript variant LAMP2B, mRNA OS=Homo sapiens PE=2 SV=1 - [B4E2S7_HUMAN]	10.19	4	4	7	363	39.7868	5.66846	1.11694	1.03594	0.866193	1.00636	1.14549	1.01503	0.969384	1.0433	0.964591	0.70491
B4DEW5	cDNA FLJ54049, highly similar to Multimerin-2 OS=Homo sapiens PE=2 SV=1 - [B4DEW5_HUMAN]	2.89	2	2	3	727	79.9884	5.74463	1.09448	1.20412	0.76354	1.02071	1.17064	0.966684	0.916507	1.01794	1.00272	0.986486
H0YLI6	Isocitrate dehydrogenase [NAD] subunit alpha, mitochondrial (Fragment) OS=Homo sapiens GN=IDH3A PE=1 SV=1 - [H0YLI6_HUMAN]	4.48	1	1	8	134	14.7997	8.104	0.897554	0.324451	0.615988	0.612664	0.34583	0.34168	0.297405	0.328305	1.86614	0.162208
C9JGI3	Thymidine phosphorylase (Fragment) OS=Homo sapiens GN=TYMP PE=1 SV=1 - [C9JGI3_HUMAN]	12.36	4	4	4	445	46.0582	5.51611	1.10298	1.01433	0.998603	1.03864	0.736261	1.09123	0.931468	0.919654	1.12938	0.331082
A8K061	cDNA FLJ77880, highly similar to Homo sapiens angiopoietin-like 3, mRNA OS=Homo sapiens PE=2 SV=1 - [A8K061_HUMAN]	15.65	6	6	7	460	53.6052	6.59521	1.22005	0.960166	1.03904	1.07309	1.29963	0.964382	0.934713	1.06624	1.00642	0.963362
P43487	Ran-specific GTPase-activating protein OS=Homo sapiens GN=RANBP1 PE=1 SV=1 - [RANG_HUMAN]	15.42	3	3	5	201	23.2956	5.2876	0.945601	1.09692	1.22273	1.08842	0.631148	1.01162	0.926425	0.856397	1.27092	0.173722
B4DQ98	cDNA FLJ55135, highly similar to Di-N-acetylchitobiase (EC 3.2.1.-) OS=Homo sapiens PE=2 SV=1 - [B4DQ98_HUMAN]	21.2	7	7	10	382	43.4054	6.44287	1.12491	1.08267	0.973669	1.06042	1.08257	0.99366	0.981832	1.01935	1.04028	0.497849
A0A0S2Z4N8	Vasodilator-stimulated phosphoprotein isoform 2 (Fragment) OS=Homo sapiens GN=VASP PE=2 SV=1 - [A0A0S2Z4N8_HUMAN]	24.09	8	8	13	328	35.4058	8.93896	0.865671	1.01192	1.49352	1.1237	0.514422	0.983157	1.08247	0.860017	1.3066	0.364836
B4DDL4	cDNA FLJ53966, moderately similar to Homo sapiens cytidylate kinase (CMPK), mRNA OS=Homo sapiens PE=2 SV=1 - [B4DDL4_HUMAN]	15.47	2	2	5	181	20.5459	8.95361	0.939367	0.969629	1.01221	0.973735	0.734665	1.04813	0.965647	0.916148	1.06286	0.581537
M0R192	Flavin reductase (NADPH) OS=Homo sapiens GN=BLVRB PE=1 SV=1 - [M0R192_HUMAN]	22.7	4	4	6	163	17.1497	6.78564	0.965655	1.06561	1.00716	1.01281	1.02157	1.02443	1.31355	1.11985	0.904416	0.34941
Q9Y509	VH3 protein (Fragment) OS=Homo sapiens GN=VH3 PE=2 SV=1 - [Q9Y509_HUMAN]	15.65	1	2	5	147	15.7587	8.38232	0.537154	0.822245	0.387428	0.582276	0.796477	0.754922	1.13698	0.896127	0.649769	0.148795
B3KNN9	cDNA FLJ30070 fis, clone ASTRO2000046, highly similar to CD166 ANTIGEN OS=Homo sapiens PE=2 SV=1 - [B3KNN9_HUMAN]	13.15	6	6	12	555	61.9015	6.18896	1.14698	1.04141	0.923664	1.03735	1.14015	0.958584	0.962858	1.02053	1.01648	0.857679
P03950	Angiogenin OS=Homo sapiens GN=ANG PE=1 SV=1 - [ANGI_HUMAN]	37.41	6	6	18	147	16.5394	9.64209	1.16749	0.977961	1.06566	1.07037	1.12173	0.855274	1.13096	1.03599	1.03318	0.761274
H7C457	Collagen alpha-1(XVIII) chain (Fragment) OS=Homo sapiens GN=COL18A1 PE=1 SV=1 - [H7C457_HUMAN]	14.29	4	4	6	280	31.0078	9.40771	1.01491	0.881217	0.975358	0.95716	1.40263	0.964723	1.20962	1.19232	0.802768	0.151216
A0A0A0MSN4	Angiotensin-converting enzyme OS=Homo sapiens GN=ACE PE=1 SV=1 - [A0A0A0MSN4_HUMAN]	5.8	7	7	7	1242	142.33	6.22705	1.21968	1.19422	0.969676	1.12786	1.15398	0.924818	0.914179	0.99766	1.1305	0.307712
U5YKD2	MHC class I antigen (Fragment) OS=Homo sapiens GN=HLA-A PE=3 SV=1 - [U5YKD2_HUMAN]	10.98	3	3	5	337	37.9108	6.32861	1.05494	0.885879	0.888571	0.943129	1.05901	1.08143	0.990916	1.04378	0.903567	0.180814
P24592	Insulin-like growth factor-binding protein 6 OS=Homo sapiens GN=IGFBP6 PE=1 SV=1 - [IBP6_HUMAN]	12.08	3	3	9	240	25.3062	7.81104	1.04714	0.801279	1.02124	0.956553	1.25547	1.03238	1.14134	1.14307	0.836831	0.138968
A0JNT2	KRT83 protein OS=Homo sapiens GN=KRT83 PE=2 SV=1 - [A0JNT2_HUMAN]	15.21	3	7	7	447	49.6095	5.38916	0.60742	0.57186	0.740074	0.639785	4.31392	0.546798	0.770449	1.87706	0.340845	0.368293
P55290	Cadherin-13 OS=Homo sapiens GN=CDH13 PE=1 SV=1 - [CAD13_HUMAN]	9.12	6	6	11	713	78.2379	4.98291	1.18046	1.0711	0.908587	1.05338	1.03725	0.988611	0.940283	0.988714	1.06541	0.483323
P48426	Phosphatidylinositol 5-phosphate 4-kinase type-2 alpha OS=Homo sapiens GN=PIP4K2A PE=1 SV=2 - [PI42A_HUMAN]	12.07	5	5	7	406	46.1955	6.99072	0.988301	1.03807	1.26532	1.09723	0.772027	1.03866	0.937319	0.916001	1.19785	0.19128
Q99969	Retinoic acid receptor responder protein 2 OS=Homo sapiens GN=RARRES2 PE=1 SV=1 - [RARR2_HUMAN]	21.47	3	3	9	163	18.6058	9.08545	1.00906	0.957833	1.01714	0.994676	1.36043	1.01566	1.05862	1.14491	0.868784	0.24397
C9J0J0	Coiled-coil domain-containing protein 126 (Fragment) OS=Homo sapiens GN=CCDC126 PE=1 SV=8 - [C9J0J0_HUMAN]	10.91	1	1	5	110	12.7029	9.48096	1.10485	1.0663	1.04423	1.07179	1.16098	1.0062	0.994927	1.05403	1.01685	0.768706
A4UCT0	Fructose-bisphosphate aldolase (Fragment) OS=Homo sapiens PE=2 SV=1 - [A4UCT0_HUMAN]	40.98	1	4	9	122	13.3938	6.771	0.901	0.98684	1.09978	0.995874	0.964414	0.860698	1.13323	0.986114	1.0099	0.925527
P08758	Annexin A5 OS=Homo sapiens GN=ANXA5 PE=1 SV=2 - [ANXA5_HUMAN]	16.88	4	5	9	320	35.9144	5.04639	1.04932	0.973661	1.26832	1.0971	0.658173	1.00838	0.91492	0.860489	1.27498	0.159204
A8K0T9	cDNA FLJ75422, highly similar to Homo sapiens capping protein (actin filament) muscle Z-line, alpha 1, mRNA OS=Homo sapiens PE=2 SV=1 - [A8K0T9_HUMAN]	15.03	2	3	4	286	32.8883	5.69385	0.993032	0.990612	1.23358	1.07241	0.577359	1.07561	1.10442	0.919128	1.16677	0.463115
V9HW35	Epididymis secretory protein Li 55 OS=Homo sapiens GN=HEL-S-55 PE=2 SV=1 - [V9HW35_HUMAN]	19.14	2	2	3	162	17.02	7.23975	0.887699	1.00312	1.06763	0.986149	0.680264	0.943261	1.10189	0.908472	1.0855	0.592527
Q8N294	cDNA FLJ33633 fis, clone BRAMY2022786, highly similar to Homo sapiens dickkopf-3 (DKK-3) mRNA OS=Homo sapiens PE=2 SV=1 - [Q8N294_HUMAN]	20	3	3	4	215	23.889	4.67822	1.35973	0.963384	0.932679	1.08526	1.08582	0.926976	0.985792	0.99953	1.08577	0.586443
Q5JY90	Tyrosine-protein kinase OS=Homo sapiens GN=BTK PE=1 SV=1 - [Q5JY90_HUMAN]	4.35	2	2	3	483	55.8452	8.03076	0.961045	1.08264	1.0581	1.03393	0.729025	1.01783	0.912556	0.886471	1.16634	0.184966
B7Z3I9	Delta-aminolevulinic acid dehydratase OS=Homo sapiens PE=2 SV=1 - [B7Z3I9_HUMAN]	9.27	2	2	3	313	34.4975	7.1958	1.05526	0.892614	0.971387	0.973086	0.990849	0.997496	1.09371	1.02735	0.947179	0.398957
B4DHN0	Mitogen-activated protein kinase OS=Homo sapiens PE=2 SV=1 - [B4DHN0_HUMAN]	2.01	1	1	8	348	40.3948	7.15186	1.09157	0.937985	0.86172	0.963759	1.16275	0.98963	1.03025	1.06088	0.908456	0.319174
A0A087X0S5	Collagen alpha-1(VI) chain OS=Homo sapiens GN=COL6A1 PE=1 SV=1 - [A0A087X0S5_HUMAN]	4	3	3	7	1026	108.272	5.42725	1.14402	1.06908	0.882852	1.03199	0.896532	1.01505	0.834873	0.915486	1.12725	0.282667
B1ALC0	Actin-related protein 2/3 complex subunit 5 OS=Homo sapiens GN=ARPC5 PE=1 SV=1 - [B1ALC0_HUMAN]	33.33	5	5	8	135	14.7984	5.05908	0.926016	1.04229	1.14051	1.03627	0.582222	0.927463	0.989362	0.833015	1.244	0.222939
I3L397	Eukaryotic translation initiation factor 5A (Fragment) OS=Homo sapiens GN=EIF5A PE=1 SV=8 - [I3L397_HUMAN]	19.18	3	3	5	146	16.0089	4.99561	0.947232	1.00929	1.09044	1.01565	0.683875	1.07869	0.997994	0.920187	1.10375	0.495207
Q59EY4	CDC10 protein variant (Fragment) OS=Homo sapiens PE=2 SV=1 - [Q59EY4_HUMAN]	17.32	5	6	8	381	43.7986	7.78174	1.06781	1.02095	1.19712	1.09529	0.664914	0.982895	0.959709	0.869172	1.26015	0.120947
Q2Q9B7	Glucose-6-phosphate 1-dehydrogenase (Fragment) OS=Homo sapiens GN=G6PD PE=3 SV=1 - [Q2Q9B7_HUMAN]	14.53	6	6	7	475	54.8218	7.07861	0.966048	1.05243	1.25957	1.09268	0.595229	0.994151	1.01312	0.867502	1.25957	0.23617
P08253	72 kDa type IV collagenase OS=Homo sapiens GN=MMP2 PE=1 SV=2 - [MMP2_HUMAN]	18.79	12	12	15	660	73.8347	5.46533	1.18966	1.0197	0.914121	1.04116	1.1689	0.979639	0.986245	1.04493	0.996396	0.972162
Q13822	Ectonucleotide pyrophosphatase/phosphodiesterase family member 2 OS=Homo sapiens GN=ENPP2 PE=1 SV=3 - [ENPP2_HUMAN]	9.5	7	7	11	863	98.9296	7.37158	1.23821	1.03601	1.04477	1.10633	1.05275	0.971359	1.00333	1.00915	1.0963	0.237955
P54289	Voltage-dependent calcium channel subunit alpha-2/delta-1 OS=Homo sapiens GN=CACNA2D1 PE=1 SV=3 - [CA2D1_HUMAN]	11.33	9	9	10	1103	124.49	5.2749	1.16365	1.03925	0.870536	1.02448	1.05576	0.908131	0.931153	0.965015	1.06162	0.571199
P25787	Proteasome subunit alpha type-2 OS=Homo sapiens GN=PSMA2 PE=1 SV=2 - [PSA2_HUMAN]	11.11	2	2	3	234	25.8823	7.43018	1.03711	1.07417	0.959959	1.02375	0.837671	0.962956	0.871491	0.890706	1.14937	0.0573436
P17174	Aspartate aminotransferase, cytoplasmic OS=Homo sapiens GN=GOT1 PE=1 SV=3 - [AATC_HUMAN]	8.23	3	3	3	413	46.2185	7.00537	0.95957	0.990517	0.995882	0.98199	0.950821	1.05476	0.921087	0.975555	1.0066	0.885848
B4E190	cDNA FLJ57770, moderately similar to ADP-ribosylation factor 3 OS=Homo sapiens PE=2 SV=1 - [B4E190_HUMAN]	12.5	2	2	3	144	16.1485	7.34229	0.953155	1.03451	1.36271	1.11679	0.619122	0.998309	0.87878	0.83207	1.34218	0.165214
P80188	Neutrophil gelatinase-associated lipocalin OS=Homo sapiens GN=LCN2 PE=1 SV=2 - [NGAL_HUMAN]	16.16	2	2	4	198	22.5737	8.90967	0.942427	1.02452	0.985388	0.98411	1.14415	0.99184	1.14177	1.09258	0.900718	0.123195
Q5NV88	V1-22 protein (Fragment) OS=Homo sapiens GN=V1-22 PE=1 SV=1 - [Q5NV88_HUMAN]	28.57	1	2	6	98	10.6369	4.77979	0.433806	0.37725	0.372101	0.394386	0.810318	0.654523	1.8045	1.08978	0.361895	0.126135
A0A087X0T8	Cell adhesion molecule 1 OS=Homo sapiens GN=CADM1 PE=1 SV=1 - [A0A087X0T8_HUMAN]	14.16	3	3	3	346	38.7555	5.43994	1.18435	0.93345	0.968203	1.02867	1.09665	1.03973	1.06689	1.06776	0.96339	0.651419
Q15323	Keratin, type I cuticular Ha1 OS=Homo sapiens GN=KRT31 PE=1 SV=3 - [K1H1_HUMAN]	14.66	5	6	7	416	47.2071	4.88135	0.668861	0.704202	0.656188	0.676417	2.9942	0.81596	0.900141	1.5701	0.430811	0.278094
B4DDZ4	Annexin OS=Homo sapiens PE=2 SV=1 - [B4DDZ4_HUMAN]	10.03	2	3	5	299	33.5928	5.85889	1.00339	0.991736	1.40775	1.13429	0.627591	0.991653	0.858841	0.826028	1.37319	0.14983
Q2HZY9	Coagulation factor V (Fragment) OS=Homo sapiens PE=4 SV=1 - [Q2HZY9_HUMAN]	70	1	5	12	70	8.37021	8.71924	1.6838	1.49387	0.786201	1.32129	1.10993	0.829197	1.10246	1.01386	1.30322	0.346352
Q15555	Microtubule-associated protein RP/EB family member 2 OS=Homo sapiens GN=MAPRE2 PE=1 SV=1 - [MARE2_HUMAN]	15.9	4	5	13	327	37.0082	5.56689	0.949529	1.08311	1.56753	1.20005	0.486865	1.02339	0.930714	0.813656	1.47489	0.197557
P08637	Low affinity immunoglobulin gamma Fc region receptor III-A OS=Homo sapiens GN=FCGR3A PE=1 SV=2 - [FCG3A_HUMAN]	19.29	2	6	20	254	29.0707	8.07471	1.33645	1.12502	0.699243	1.05357	1.16797	1.04378	1.03301	1.08159	0.9741	0.891239
Q15819	Ubiquitin-conjugating enzyme E2 variant 2 OS=Homo sapiens GN=UBE2V2 PE=1 SV=4 - [UB2V2_HUMAN]	11.72	2	2	4	145	16.3522	8.08936	0.91701	1.0339	1.57223	1.17438	0.560076	0.973703	0.921325	0.818368	1.43503	0.212181
O14498	Immunoglobulin superfamily containing leucine-rich repeat protein OS=Homo sapiens GN=ISLR PE=2 SV=1 - [ISLR_HUMAN]	3.04	1	1	2	428	45.9684	5.14795	1.06643	0.875322	0.778201	0.90665	1.2159	1.01525	0.983703	1.07162	0.846057	0.21344
P55145	Mesencephalic astrocyte-derived neurotrophic factor OS=Homo sapiens GN=MANF PE=1 SV=3 - [MANF_HUMAN]	15.93	3	3	5	182	20.6868	8.68994	0.936326	1.01399	1.57783	1.17605	0.55525	1.03267	0.842157	0.810028	1.45186	0.209757
H0YD65	Cathepsin F (Fragment) OS=Homo sapiens GN=CTSF PE=1 SV=8 - [H0YD65_HUMAN]	6.74	2	2	4	282	31.7847	7.29834	1.16286	1.00083	1.03589	1.06653	0.995444	1.02574	0.929008	0.983398	1.08453	0.217865
Q59F24	Vascular endothelial growth factor receptor 3 variant (Fragment) OS=Homo sapiens PE=2 SV=1 - [Q59F24_HUMAN]	8.32	3	3	3	649	71.6882	6.66846	1.03489	1.11834	0.910033	1.02109	0.975932	1.02678	1.01183	1.00485	1.01616	0.807443
Q86UD1	Out at first protein homolog OS=Homo sapiens GN=OAF PE=2 SV=1 - [OAF_HUMAN]	17.95	4	4	4	273	30.6686	6.84424	1.20991	1.07	0.8836	1.0545	1.17934	0.972967	1.08605	1.07945	0.976886	0.834296
Q53H37	Calmodulin-like skin protein variant (Fragment) OS=Homo sapiens PE=2 SV=1 - [Q53H37_HUMAN]	8.9	1	1	1	146	15.8667	4.43701	1.21532	1.11114	1.15006	1.15884	0.911741	1.06654	1.06742	1.01523	1.14145	0.0749358
Q86YW5	Trem-like transcript 1 protein OS=Homo sapiens GN=TREML1 PE=1 SV=2 - [TRML1_HUMAN]	12.54	3	3	10	311	32.6579	6.04932	0.942666	1.01288	0.955751	0.970433	0.832756	1.01784	0.996188	0.948929	1.02266	0.747255
P00568	Adenylate kinase isoenzyme 1 OS=Homo sapiens GN=AK1 PE=1 SV=3 - [KAD1_HUMAN]	23.2	4	4	5	194	21.6213	8.63135	0.8942	1.07142	1.05719	1.0076	0.63294	0.997313	0.916776	0.84901	1.1868	0.270961
Q8IXL6	Extracellular serine/threonine protein kinase FAM20C OS=Homo sapiens GN=FAM20C PE=1 SV=2 - [FA20C_HUMAN]	6.51	3	3	5	584	66.1925	7.73779	1.00712	1.10615	0.985726	1.033	1.03492	1.05942	1.04188	1.04541	0.988133	0.759233
P68366	Tubulin alpha-4A chain OS=Homo sapiens GN=TUBA4A PE=1 SV=1 - [TBA4A_HUMAN]	15.4	1	6	10	448	49.8924	5.05908	0.901391	0.955436	1.77819	1.21167	0.244069	1.04804	0.968474	0.753528	1.608	0.296541
A0A024R412	Neuropilin OS=Homo sapiens GN=NRP2 PE=1 SV=1 - [A0A024R412_HUMAN]	7.1	6	6	6	901	101.317	5.64307	1.12495	0.975301	0.999574	1.03328	1.0972	0.929436	0.896165	0.974266	1.06057	0.489308
F5H5I5	ATP-binding cassette sub-family B member 9 (Fragment) OS=Homo sapiens GN=ABCB9 PE=4 SV=1 - [F5H5I5_HUMAN]	10.77	1	1	6	65	7.43285	6.49365	1.096	0.835708	0.85407	0.928591	1.14766	0.988097	1.24678	1.12751	0.823574	0.152448
A8K4W8	cDNA FLJ77917, highly similar to Homo sapiens ubiquitin-conjugating enzyme E2L 3 (UBE2L3), transcript variant 1, mRNA OS=Homo sapiens PE=2 SV=1 - [A8K4W8_HUMAN]	29.87	3	4	15	154	17.7782	8.74854	0.854476	0.984617	1.37917	1.07275	0.573902	1.01842	0.949336	0.847218	1.26621	0.342608
Q15185	Prostaglandin E synthase 3 OS=Homo sapiens GN=PTGES3 PE=1 SV=1 - [TEBP_HUMAN]	16.88	2	2	3	160	18.6854	4.53857	1.00236	0.975652	1.31103	1.09635	0.608265	0.97094	1.00422	0.861142	1.27313	0.230201
P59998	Actin-related protein 2/3 complex subunit 4 OS=Homo sapiens GN=ARPC4 PE=1 SV=3 - [ARPC4_HUMAN]	25.6	5	5	9	168	19.6543	8.42627	0.955569	1.09728	1.26513	1.10599	0.542533	1.05784	1.01634	0.872235	1.268	0.281502
B2RBW9	cDNA, FLJ95746, highly similar to Homo sapiens inhibin, beta C (INHBC), mRNA OS=Homo sapiens PE=2 SV=1 - [B2RBW9_HUMAN]	10.23	3	3	5	352	38.2014	7.10791	1.20761	1.08116	0.972001	1.08692	1.14305	0.825406	0.987985	0.985481	1.10293	0.424623
O15143	Actin-related protein 2/3 complex subunit 1B OS=Homo sapiens GN=ARPC1B PE=1 SV=3 - [ARC1B_HUMAN]	10.22	5	5	10	372	40.9234	8.35303	1.00759	1.04028	1.18737	1.07841	0.710996	0.9538	1.04156	0.902119	1.19542	0.19461
Q59EZ3	Insulin-like growth factor 2 receptor variant (Fragment) OS=Homo sapiens PE=2 SV=1 - [Q59EZ3_HUMAN]	2.86	6	6	6	2414	265.943	5.8335	1.0287	1.07051	1.12554	1.07492	1.10722	0.952013	0.967335	1.00886	1.06548	0.309369
A0A087WZR4	Low affinity immunoglobulin gamma Fc region receptor III-B OS=Homo sapiens GN=FCGR3B PE=1 SV=1 - [A0A087WZR4_HUMAN]	24.54	2	6	19	216	24.4062	6.7124	1.19146	0.750728	0.666054	0.869412	1.17782	1.29903	1.29024	1.2557	0.692374	0.082347
P13727	Bone marrow proteoglycan OS=Homo sapiens GN=PRG2 PE=1 SV=2 - [PRG2_HUMAN]	4.5	1	1	3	222	25.1893	6.75635	0.93498	0.782316	1.04408	0.920457	1.45442	0.867679	1.29725	1.20645	0.762949	0.208815
A0A024RC87	Ribonuclease/angiogenin inhibitor 1, isoform CRA_a OS=Homo sapiens GN=RNH1 PE=4 SV=1 - [A0A024RC87_HUMAN]	10.53	4	4	4	456	49.3848	4.84326	1.06794	0.953602	1.15128	1.05761	0.868575	0.995564	1.09156	0.985234	1.07346	0.449015
Q9H7V3	cDNA FLJ14219 fis, clone NT2RP3003800, highly similar to Rattus norvegicus tyrosine protein kinase pp60-c-src mRNA OS=Homo sapiens PE=2 SV=1 - [Q9H7V3_HUMAN]	8.37	2	2	3	251	28.7025	5.73193	0.833645	1.11684	1.33884	1.09644	0.602471	0.93441	0.96513	0.834004	1.31467	0.232516
F6RFD5	Destrin OS=Homo sapiens GN=DSTN PE=1 SV=1 - [F6RFD5_HUMAN]	20	2	3	4	135	15.3869	8.5874	0.820755	1.03136	1.3643	1.07214	0.63058	1.04754	0.954218	0.877447	1.22189	0.390728
A0A0F7T6Q1	IGHV1-2 protein (Fragment) OS=Homo sapiens GN=IGHV1-2 PE=4 SV=1 - [A0A0F7T6Q1_HUMAN]	29.52	2	3	7	105	11.9037	9.29053	0.744778	0.550132	0.585254	0.626721	0.984254	0.781783	1.20745	0.991163	0.632309	0.0560876
O95479	GDH/6PGL endoplasmic bifunctional protein OS=Homo sapiens GN=H6PD PE=1 SV=2 - [G6PE_HUMAN]	6.19	5	5	5	791	88.8364	7.29834	1.11144	1.04279	1.0808	1.07834	1.10688	0.995351	0.966754	1.023	1.0541	0.305435
D6RFG5	Annexin (Fragment) OS=Homo sapiens GN=ANXA3 PE=1 SV=1 - [D6RFG5_HUMAN]	16.88	2	2	2	154	17.1348	7.48877	0.988997	1.00015	1.2266	1.07192	0.689119	1.07349	1.02293	0.928511	1.15445	0.37356
Q15746	Myosin light chain kinase, smooth muscle OS=Homo sapiens GN=MYLK PE=1 SV=4 - [MYLK_HUMAN]	2.51	3	5	6	1914	210.583	6.15088	0.908229	0.979768	1.50068	1.12956	0.520954	0.994916	0.923758	0.813209	1.38902	0.254493
B4E324	cDNA FLJ60397, highly similar to Lysosomal protective protein (EC 3.4.16.5) OS=Homo sapiens PE=2 SV=1 - [B4E324_HUMAN]	6.88	3	3	4	480	54.235	6.97607	1.02352	1.11671	1.16896	1.10307	0.804639	1.03705	0.917788	0.919826	1.19921	0.0823492
B4DFW2	Metalloproteinase inhibitor 2 OS=Homo sapiens GN=TIMP2 PE=1 SV=1 - [B4DFW2_HUMAN]	6.29	1	1	1	143	16.0707	6.30322	1.19883	1.029	1.02969	1.08584	1.12676	1.09273	0.873177	1.03089	1.0533	0.603123
P61088	Ubiquitin-conjugating enzyme E2 N OS=Homo sapiens GN=UBE2N PE=1 SV=1 - [UBE2N_HUMAN]	19.08	3	3	5	152	17.127	6.56592	0.998053	1.06748	1.24215	1.10256	0.83236	1.04191	1.02161	0.965293	1.1422	0.23634
Q53QE9	Uncharacterized protein UGP2 (Fragment) OS=Homo sapiens GN=UGP2 PE=4 SV=1 - [Q53QE9_HUMAN]	11.42	5	5	7	438	49.1906	8.68994	0.905601	0.906744	1.16845	0.993599	0.805167	1.06357	0.992927	0.953887	1.04163	0.750495
F5GX11	Proteasome endopeptidase complex OS=Homo sapiens GN=PSMA1 PE=1 SV=1 - [F5GX11_HUMAN]	11.34	3	3	3	238	26.4884	6.72705	1.14125	1.14139	1.01543	1.09935	0.786288	0.966365	0.998202	0.916951	1.19892	0.0800048
B2R7P8	cDNA, FLJ93545, highly similar to Homo sapiens 5-aminoimidazole-4-carboxamide ribonucleotide formyltransferase/IMP cyclohydrolase (ATIC), mRNA OS=Homo sapiens PE=2 SV=1 - [B2R7P8_HUMAN]	5.41	3	3	3	592	64.5944	6.80029	0.871944	1.0568	1.20356	1.0441	0.654039	0.989301	0.992737	0.878692	1.18824	0.325532
O95497	Pantetheinase OS=Homo sapiens GN=VNN1 PE=1 SV=2 - [VNN1_HUMAN]	17.74	8	8	10	513	56.9751	5.5542	1.23967	1.04938	0.970431	1.08649	0.946397	1.1012	0.971183	1.00626	1.07973	0.437938
O15144	Actin-related protein 2/3 complex subunit 2 OS=Homo sapiens GN=ARPC2 PE=1 SV=1 - [ARPC2_HUMAN]	20	6	6	11	300	34.3115	7.35693	1.01867	1.04143	1.22699	1.0957	0.748055	0.993976	0.984592	0.908874	1.20556	0.14699
P09382	Galectin-1 OS=Homo sapiens GN=LGALS1 PE=1 SV=2 - [LEG1_HUMAN]	19.26	3	3	4	135	14.7062	5.50342	1.17323	1.09625	0.94981	1.0731	0.982037	0.998254	1.17342	1.05124	1.02079	0.819478
O75368	SH3 domain-binding glutamic acid-rich-like protein OS=Homo sapiens GN=SH3BGRL PE=1 SV=1 - [SH3L1_HUMAN]	35.09	5	5	7	114	12.7664	5.24951	0.918709	0.886158	1.33598	1.04695	0.591128	1.05249	0.993021	0.878879	1.19123	0.45806
H3BMH2	Ras-related protein Rab-11A (Fragment) OS=Homo sapiens GN=RAB11A PE=4 SV=1 - [H3BMH2_HUMAN]	11.61	2	2	4	155	17.6571	8.33838	0.864388	0.819883	1.51685	1.06704	0.609304	0.97875	1.41204	1.00003	1.067	0.845956
U3KQE2	Calpain small subunit 1 (Fragment) OS=Homo sapiens GN=CAPNS1 PE=1 SV=1 - [U3KQE2_HUMAN]	24.84	3	3	3	161	18.4337	4.91943	0.842355	0.94711	1.2885	1.02599	0.670281	1.16504	1.04725	0.960856	1.06778	0.762162
F5H810	Noelin (Fragment) OS=Homo sapiens GN=OLFM1 PE=1 SV=1 - [F5H810_HUMAN]	21.15	4	4	10	208	24.206	6.41748	1.13838	1.10701	0.922961	1.05612	1.09514	0.982789	1.01979	1.03257	1.0228	0.768896
E5RIW3	Tubulin-specific chaperone A OS=Homo sapiens GN=TBCA PE=1 SV=1 - [E5RIW3_HUMAN]	25	3	3	3	84	10.074	4.62744	0.977744	1.02343	1.2898	1.09699	0.628931	0.959444	0.947754	0.845376	1.29764	0.158972
Q59H37	Laminin alpha 2 subunit variant (Fragment) OS=Homo sapiens PE=2 SV=1 - [Q59H37_HUMAN]	1.51	3	3	3	1853	204.43	6.37939	1.2167	0.935229	1.00307	1.05167	1.26363	0.876948	1.01676	1.05245	0.99926	0.995866
Q92686	Neurogranin OS=Homo sapiens GN=NRGN PE=1 SV=1 - [NEUG_HUMAN]	19.23	1	1	2	78	7.61366	7.86963	0.809546	1.17256	0.912358	0.964821	0.568207	1.26726	0.884359	0.906608	1.06421	0.812001
A0A024RCB5	Chitinase domain containing 1, isoform CRA_a OS=Homo sapiens GN=CHID1 PE=4 SV=1 - [A0A024RCB5_HUMAN]	3.63	1	1	1	386	44.0898	7.69385	1.0125	1.10556	1.174	1.09735	0.596593	1.0946	0.951655	0.88095	1.24565	0.23584
Q7RTS7	Keratin, type II cytoskeletal 74 OS=Homo sapiens GN=KRT74 PE=1 SV=2 - [K2C74_HUMAN]	5.1	1	3	10	529	57.8296	7.7085	1.36161	1.26719	0.946072	1.19162	0.914573	0.955798	0.93196	0.93411	1.27568	0.111146
F6VDH7	Hsc70-interacting protein (Fragment) OS=Homo sapiens GN=ST13 PE=1 SV=1 - [F6VDH7_HUMAN]	19.14	3	3	3	162	18.074	4.77979	0.936364	0.98133	1.11063	1.00944	0.576551	1.0748	1.21588	0.955745	1.05618	0.802405
Q9UJC5	SH3 domain-binding glutamic acid-rich-like protein 2 OS=Homo sapiens GN=SH3BGRL2 PE=1 SV=2 - [SH3L2_HUMAN]	24.3	2	2	3	107	12.3182	6.7124	0.90546	1.02118	1.35226	1.09297	0.508735	1.10133	0.858671	0.822911	1.32817	0.283077
O43665	Regulator of G-protein signaling 10 OS=Homo sapiens GN=RGS10 PE=1 SV=2 - [RGS10_HUMAN]	16.18	2	2	2	173	20.223	5.49072	0.944594	1.03173	1.2911	1.08914	0.593463	1.01344	0.826763	0.811222	1.34259	0.15732
V9H0D6	Complement C4A3 (Fragment) OS=Homo sapiens GN=C4A PE=4 SV=1 - [V9H0D6_HUMAN]	28.95	1	1	2	38	4.30918	5.0083	0.91577	1.01299	0.667687	0.865483	1.10437	1.05557	1.27515	1.14503	0.755863	0.0845562
P29350	Tyrosine-protein phosphatase non-receptor type 6 OS=Homo sapiens GN=PTPN6 PE=1 SV=1 - [PTN6_HUMAN]	9.24	5	5	7	595	67.5191	7.78174	0.921738	0.997846	1.28705	1.06888	0.662071	1.05073	0.889891	0.867564	1.23205	0.272675
B7ZAL5	cDNA, FLJ79229, highly similar to Lactotransferrin (EC 3.4.21.-) OS=Homo sapiens PE=2 SV=1 - [B7ZAL5_HUMAN]	7.51	5	5	5	666	73.1232	7.78174	0.901279	1.05235	1.09997	1.01786	1.184	0.833504	1.21112	1.07621	0.945789	0.689078
A0A024R5A3	Calpain 1, (Mu/I) large subunit, isoform CRA_b OS=Homo sapiens GN=CAPN1 PE=3 SV=1 - [A0A024R5A3_HUMAN]	11.13	8	8	12	710	81.416	5.74463	0.938798	1.04967	1.21607	1.06818	0.626253	1.01708	0.877728	0.840353	1.27111	0.178737
Q9UNH2	MC51L-53L-54L homolog (Fragment) OS=Homo sapiens PE=4 SV=1 - [Q9UNH2_HUMAN]	4.89	1	1	4	184	19.8162	7.34229	1.19195	0.786815	0.97722	0.985328	1.30653	1.03122	0.913987	1.08391	0.909047	0.582389
A8K1D2	cDNA FLJ76601, highly similar to Homo sapiens LIM and SH3 protein 1 (LASP1), mRNA OS=Homo sapiens PE=2 SV=1 - [A8K1D2_HUMAN]	17.62	5	5	6	261	29.6262	7.37158	0.908346	1.01447	1.0603	0.994372	0.59893	1.04249	0.924836	0.85542	1.16244	0.377405
B4DSV9	cDNA FLJ56632, moderately similar to Target of Nesh-SH3 OS=Homo sapiens PE=2 SV=1 - [B4DSV9_HUMAN]	7.68	6	6	7	1029	113.36	9.56885	1.15473	1.02773	0.982965	1.05514	1.10194	0.990146	0.967121	1.01974	1.03472	0.621036
B4DFP1	cDNA FLJ51818, highly similar to Phosphoglucomutase-1 (EC 5.4.2.2) OS=Homo sapiens PE=2 SV=1 - [B4DFP1_HUMAN]	12.83	6	6	6	538	58.702	6.04932	0.897173	1.00261	1.35192	1.0839	0.598193	1.15169	0.825065	0.858315	1.26282	0.346057
B4DSD8	Alpha-1,4 glucan phosphorylase OS=Homo sapiens PE=2 SV=1 - [B4DSD8_HUMAN]	6.52	5	5	5	752	85.7328	6.16357	0.946638	0.952817	1.17835	1.02594	0.715565	1.06491	0.958464	0.912979	1.12372	0.428834
P14543	Nidogen-1 OS=Homo sapiens GN=NID1 PE=1 SV=3 - [NID1_HUMAN]	7.06	7	8	9	1247	136.291	5.2876	1.04496	0.983799	1.06492	1.03123	0.972917	0.967766	0.934233	0.958305	1.07609	0.0554682
B4DM33	cDNA FLJ52068, highly similar to Microtubule-associated protein RP/EB family member 1 OS=Homo sapiens PE=2 SV=1 - [B4DM33_HUMAN]	25.63	4	5	6	238	26.5656	5.2876	0.994207	0.968342	1.29797	1.08684	0.718717	0.993557	0.937779	0.883351	1.23036	0.20631
B4DNJ3	Alpha-amylase OS=Homo sapiens PE=2 SV=1 - [B4DNJ3_HUMAN]	4.95	2	2	2	465	53.3209	5.5415	1.01812	0.847806	1.25075	1.03889	0.832934	1.0049	0.930145	0.92266	1.12597	0.411701
Q5H9A7	Metalloproteinase inhibitor 1 OS=Homo sapiens GN=TIMP1 PE=1 SV=1 - [Q5H9A7_HUMAN]	32.87	4	4	8	143	16.0468	8.07471	1.04855	0.955066	1.04671	1.01678	1.09624	0.969046	0.999333	1.02154	0.995336	0.927554
P78386	Keratin, type II cuticular Hb5 OS=Homo sapiens GN=KRT85 PE=1 SV=1 - [KRT85_HUMAN]	9.47	2	6	6	507	55.7665	6.55127	0.631258	0.494816	0.655644	0.593906	4.22974	0.56492	0.990178	1.92828	0.307998	0.3135
H0Y532	Selenium-binding protein 1 (Fragment) OS=Homo sapiens GN=SELENBP1 PE=1 SV=8 - [H0Y532_HUMAN]	15.74	4	4	4	305	33.9019	5.64307	0.984676	0.971998	0.874088	0.943587	0.894884	1.02114	1.23667	1.0509	0.897886	0.367498
B2R5M8	Isocitrate dehydrogenase [NADP] OS=Homo sapiens PE=2 SV=1 - [B2R5M8_HUMAN]	11.35	6	6	7	414	46.6195	7.00537	0.914813	1.01424	1.05623	0.995092	0.768394	1.1044	0.906605	0.926467	1.07407	0.553147
B4DM05	cDNA FLJ51241, highly similar to Nidogen-1 OS=Homo sapiens PE=2 SV=1 - [B4DM05_HUMAN]	2.62	1	2	2	726	79.2832	4.97021	0.829891	1.27833	0.822753	0.97699	0.991897	1.06408	1.10827	1.05475	0.926278	0.641112
Q9UQ80	Proliferation-associated protein 2G4 OS=Homo sapiens GN=PA2G4 PE=1 SV=3 - [PA2G4_HUMAN]	7.36	2	2	3	394	43.7592	6.55127	0.953764	0.9632	1.26586	1.06094	0.601009	1.14238	0.990348	0.911246	1.16428	0.477067
Q1KSF8	XTP3TPA-transactivated protein 1 OS=Homo sapiens GN=XTP3TPATP1 PE=2 SV=1 - [Q1KSF8_HUMAN]	10.1	2	2	2	208	23.6107	6.90283	0.894045	1.16917	1.04405	1.03575	0.689212	1.06447	1.05856	0.937413	1.10491	0.541195
Q9GZP8	Immortalization up-regulated protein OS=Homo sapiens GN=IMUP PE=1 SV=1 - [IMUP_HUMAN]	9.43	1	1	2	106	10.8906	9.72998	0.844546	1.18901	1.61324	1.2156	0.461271	1.10771	0.762251	0.777076	1.56433	0.205461
P42574	Caspase-3 OS=Homo sapiens GN=CASP3 PE=1 SV=2 - [CASP3_HUMAN]	11.19	2	2	2	277	31.5875	6.53662	0.897003	1.08039	0.989457	0.988949	0.728518	1.10944	0.965191	0.934384	1.0584	0.680285
B2RBR9	cDNA, FLJ95650, highly similar to Homo sapiens karyopherin (importin) beta 1 (KPNB1), mRNA OS=Homo sapiens PE=2 SV=1 - [B2RBR9_HUMAN]	5.37	3	3	3	876	97.122	4.77979	1.00226	0.956489	1.0342	0.997651	0.713557	1.10265	1.08618	0.967461	1.0312	0.826486
Q5JRR9	Ubiquitin-like modifier-activating enzyme 1 (Fragment) OS=Homo sapiens GN=UBA1 PE=1 SV=8 - [Q5JRR9_HUMAN]	8.89	2	2	2	270	29.1616	4.98291	1.01654	1.05715	1.17829	1.08399	0.66209	1.00468	0.94001	0.868926	1.24751	0.136781
A2NV54	Precursor (AA -19 to 108) (Fragment) OS=Homo sapiens PE=2 SV=1 - [A2NV54_HUMAN]	22.31	1	3	11	130	13.5558	8.17725	0.816075	0.749875	0.667075	0.744342	1.15256	0.906068	1.85931	1.30598	0.569949	0.123803
P35555	Fibrillin-1 OS=Homo sapiens GN=FBN1 PE=1 SV=3 - [FBN1_HUMAN]	1.36	4	4	4	2871	312.022	4.93213	1.24061	0.927684	0.930531	1.03294	0.995277	0.989825	0.960085	0.981729	1.05217	0.649476
B4DL49	cDNA FLJ58073, moderately similar to Cathepsin B (EC 3.4.22.1) OS=Homo sapiens PE=2 SV=1 - [B4DL49_HUMAN]	14.29	3	3	3	273	30.7477	6.62451	1.22817	1.02183	0.996042	1.08201	1.24477	0.896064	0.990056	1.04363	1.03678	0.778317
Q8NDA2	Hemicentin-2 OS=Homo sapiens GN=HMCN2 PE=2 SV=3 - [HMCN2_HUMAN]	0.2	1	1	1	5059	541.639	5.87158	0.949079	0.9593	0.948843	0.952407	1.07254	1.10429	0.924353	1.03373	0.921334	0.21711
B4E0K5	Mitogen-activated protein kinase OS=Homo sapiens GN=MAPK14 PE=1 SV=1 - [B4E0K5_HUMAN]	6.71	1	2	3	283	32.3363	4.91943	0.882547	1.01581	1.25546	1.05127	0.649218	1.10741	1.02124	0.925956	1.13534	0.520144
B4DEA3	cDNA FLJ56531, highly similar to UV excision repair protein RAD23 homolog B OS=Homo sapiens PE=2 SV=1 - [B4DEA3_HUMAN]	6.7	3	3	3	403	42.2834	5.42725	1.04348	1.05705	1.26286	1.12113	0.577745	1.03834	0.955268	0.857119	1.30802	0.171121
E9PC71	Hippocalcin-like protein 1 OS=Homo sapiens GN=HPCAL1 PE=1 SV=1 - [E9PC71_HUMAN]	18.29	3	3	5	175	20.2588	5.68115	0.909429	0.90651	1.56337	1.12644	0.555834	0.988616	0.801308	0.781919	1.4406	0.243148
Q5T085	Alpha-amylase 1 (Fragment) OS=Homo sapiens GN=AMY1B PE=1 SV=1 - [Q5T085_HUMAN]	11.95	3	3	3	226	25.5544	7.31299	1.12706	1.06046	0.824502	1.004	1.12607	1.06652	0.784454	0.992349	1.01174	0.937532
A0A024RDB8	Heparanase, isoform CRA_a OS=Homo sapiens GN=HPSE PE=4 SV=1 - [A0A024RDB8_HUMAN]	3.31	1	1	2	543	61.1381	9.29053	1.07385	0.988141	0.922619	0.994869	0.710326	1.16703	1.23216	1.03651	0.95983	0.818475
P20774	Mimecan OS=Homo sapiens GN=OGN PE=1 SV=1 - [MIME_HUMAN]	10.07	3	3	4	298	33.9009	5.63037	1.15155	0.979166	1.00751	1.04607	1.15124	1.07834	1.01549	1.08169	0.967074	0.619278
A0A024RD39	Platelet-activating factor acetylhydrolase OS=Homo sapiens GN=PLA2G7 PE=4 SV=1 - [A0A024RD39_HUMAN]	9.3	5	5	6	441	50.0173	7.56201	1.07329	0.946891	0.794974	0.938385	1.25498	0.918635	0.981595	1.05174	0.892225	0.43532
F5H5G1	Limbic system-associated membrane protein OS=Homo sapiens GN=LSAMP PE=1 SV=2 - [F5H5G1_HUMAN]	9.03	2	2	2	288	31.722	5.90967	1.15485	1.01317	0.915506	1.02784	1.02063	1.07978	0.839816	0.980076	1.04874	0.658406
Q8NBJ4	Golgi membrane protein 1 OS=Homo sapiens GN=GOLM1 PE=1 SV=1 - [GOLM1_HUMAN]	10.47	3	3	4	401	45.3058	4.97021	1.29263	1.0948	0.930989	1.10614	1.10508	0.97143	0.948	1.00817	1.09718	0.443835
Q6IBS0	Twinfilin-2 OS=Homo sapiens GN=TWF2 PE=1 SV=2 - [TWF2_HUMAN]	8.02	3	3	3	349	39.5233	6.84424	0.867185	1.03695	1.46328	1.12247	0.581105	1.04096	0.816014	0.812693	1.38118	0.234509
Q5U000	Cathepsin Z OS=Homo sapiens PE=2 SV=1 - [Q5U000_HUMAN]	5.61	2	2	3	303	33.8462	7.10791	1.17472	1.03039	1.05478	1.08663	1.26918	0.932311	1.06756	1.08968	0.997201	0.978737
P04066	Tissue alpha-L-fucosidase OS=Homo sapiens GN=FUCA1 PE=1 SV=4 - [FUCO_HUMAN]	2.36	1	1	1	466	53.6547	6.84424	1.0394	1.19022	1.13763	1.12242	1.12062	1.03929	0.986413	1.04877	1.07022	0.279781
A0A218KGR2	Amyloid beta A4 protein isoform a OS=Homo sapiens GN=APP PE=4 SV=1 - [A0A218KGR2_HUMAN]	7.14	5	5	5	770	86.8851	4.83057	0.652616	1.07757	1.05945	0.929877	0.680319	1.10758	1.00529	0.931064	0.998726	0.995299
B4DM63	Actin-related protein 2/3 complex subunit 3 OS=Homo sapiens PE=2 SV=1 - [B4DM63_HUMAN]	11.98	2	2	3	167	19.0489	8.88037	0.96987	1.09011	1.29908	1.11969	0.419372	0.993119	0.91708	0.776524	1.44192	0.167847
P12318	Low affinity immunoglobulin gamma Fc region receptor II-a OS=Homo sapiens GN=FCGR2A PE=1 SV=4 - [FCG2A_HUMAN]	9.78	2	2	5	317	34.9785	6.68311	1.11198	0.939717	1.03881	1.03017	1.01463	1.01328	1.0281	1.01867	1.01129	0.829859
B4DVZ8	Leukotriene A(4) hydrolase OS=Homo sapiens PE=2 SV=1 - [B4DVZ8_HUMAN]	10.16	5	5	6	561	63.7894	5.8335	1.13333	0.981333	1.04264	1.05243	0.770291	0.971561	0.976679	0.906177	1.1614	0.145438
H3BLU7	Aflatoxin B1 aldehyde reductase member 2 (Fragment) OS=Homo sapiens GN=AKR7A2 PE=1 SV=1 - [H3BLU7_HUMAN]	9.87	2	2	3	314	34.6622	7.18115	0.924363	1.04332	0.728263	0.898648	0.775098	0.883155	1.12389	0.927382	0.969016	0.845309
E9PNW4	CD59 glycoprotein OS=Homo sapiens GN=CD59 PE=1 SV=1 - [E9PNW4_HUMAN]	7.41	1	1	2	108	11.9765	5.74463	1.22058	0.934451	1.05054	1.06852	1.05975	0.956803	1.19199	1.06951	0.999074	0.993087
B3KQF5	cDNA FLJ90381 fis, clone NT2RP2005035, highly similar to Calumenin OS=Homo sapiens PE=2 SV=1 - [B3KQF5_HUMAN]	20.95	6	6	6	315	36.9956	4.66553	0.871778	1.07114	1.18984	1.04425	0.661148	0.960685	0.953636	0.85849	1.21638	0.242184
F8WE71	Serine/threonine-protein phosphatase PP1-beta catalytic subunit OS=Homo sapiens GN=PPP1CB PE=1 SV=1 - [F8WE71_HUMAN]	26.56	1	1	1	64	6.93966	5.24951	0.831094	0.954916	0.874375	0.886795	0.906162	1.20019	1.02019	1.04218	0.850904	0.169929
B7UCU6	Gamma-globin chain (Fragment) OS=Homo sapiens GN=HBG2 PE=3 SV=1 - [B7UCU6_HUMAN]	18.1	1	2	3	105	11.5789	6.68311	0.934752	0.736638	0.728805	0.800065	1.01063	1.24295	1.56589	1.27316	0.62841	0.0535007
Q68BL8	Olfactomedin-like protein 2B OS=Homo sapiens GN=OLFML2B PE=2 SV=2 - [OLM2B_HUMAN]	0.8	1	1	5	750	83.9466	5.19873	1.13984	1.05038	1.00574	1.06532	1.12864	0.939435	1.07653	1.0482	1.01633	0.815878
G3V2V8	Epididymal secretory protein E1 (Fragment) OS=Homo sapiens GN=NPC2 PE=1 SV=1 - [G3V2V8_HUMAN]	26.23	3	3	4	122	13.0697	8.33838	1.14987	0.999075	1.03037	1.05977	1.09391	0.977636	1.0886	1.05338	1.00607	0.919711
F5H6R7	Ras-related protein Rap-1b (Fragment) OS=Homo sapiens GN=RAP1B PE=1 SV=1 - [F5H6R7_HUMAN]	21.31	2	2	2	122	13.7438	4.58936	0.73047	1.13817	1.45311	1.10725	0.861101	1.05111	0.592494	0.834902	1.3262	0.333621
B2R932	cDNA, FLJ94187, highly similar to Homo sapiens CD99 antigen (CD99), mRNA OS=Homo sapiens PE=2 SV=1 - [B2R932_HUMAN]	7.57	1	1	1	185	18.9354	4.81787	0.922136	1.32997	1.0564	1.10284	0.780091	0.763135	0.861749	0.801658	1.37569	0.0717649
P08493	Matrix Gla protein OS=Homo sapiens GN=MGP PE=1 SV=2 - [MGP_HUMAN]	10.68	1	1	1	103	12.3453	9.67139	1.65745	1.10446	1.04652	1.26948	1.04339	0.806304	0.707909	0.852534	1.48907	0.129253
B3KR50	cDNA FLJ33691 fis, clone BRAWH2002976, highly similar to GROWTH FACTOR RECEPTOR-BOUND PROTEIN 2 OS=Homo sapiens PE=2 SV=1 - [B3KR50_HUMAN]	13.36	3	3	3	217	25.1784	6.31592	0.866979	0.845508	1.09202	0.934838	0.802274	1.03526	1.12764	0.988393	0.945815	0.690038
D6RF86	Cadherin-6 OS=Homo sapiens GN=CDH6 PE=1 SV=1 - [D6RF86_HUMAN]	3.95	2	2	2	608	67.3607	4.88135	1.15757	0.888471	0.907355	0.984465	1.00232	1.11585	0.926881	1.01502	0.9699	0.780807
E6Y365	Met proto-oncogene variant I OS=Homo sapiens PE=2 SV=1 - [E6Y365_HUMAN]	3.1	3	3	4	934	104.219	7.45947	1.06358	0.927552	1.16794	1.05303	0.87526	0.960951	0.768308	0.868173	1.21292	0.106821
P23470	Receptor-type tyrosine-protein phosphatase gamma OS=Homo sapiens GN=PTPRG PE=1 SV=4 - [PTPRG_HUMAN]	2.21	3	3	3	1445	161.901	6.41748	1.25278	0.920162	0.984525	1.05249	1.10046	0.934741	0.888269	0.97449	1.08004	0.552727
P24844	Myosin regulatory light polypeptide 9 OS=Homo sapiens GN=MYL9 PE=1 SV=4 - [MYL9_HUMAN]	6.4	1	1	1	172	19.8144	4.91943	1.02426	1.02655	1.9182	1.323	0.46039	0.774041	0.982122	0.738851	1.79062	0.155208
Q5T3N1	Annexin (Fragment) OS=Homo sapiens GN=ANXA1 PE=1 SV=1 - [Q5T3N1_HUMAN]	10.78	2	2	2	204	22.7408	5.52881	1.07105	0.969776	1.16681	1.06921	0.5811	1.02523	1.02953	0.87862	1.21692	0.297522
Q9NY97	N-acetyllactosaminide beta-1,3-N-acetylglucosaminyltransferase 2 OS=Homo sapiens GN=B3GNT2 PE=1 SV=2 - [B3GN2_HUMAN]	9.07	3	3	4	397	45.9926	8.54346	1.0468	1.02237	0.981639	1.01694	1.13913	0.89723	1.03979	1.02538	0.991764	0.913158
H3BPL6	Sulfotransferase (Fragment) OS=Homo sapiens GN=SULT1A3 PE=1 SV=1 - [H3BPL6_HUMAN]	10.37	1	1	1	135	15.8749	5.94775	0.956211	0.954004	1.13797	1.01606	0.657864	1.15596	0.877945	0.897257	1.13241	0.489982
B5BUI8	Dual specificity phosphatase 3 (Fragment) OS=Homo sapiens GN=DUSP3 PE=2 SV=1 - [B5BUI8_HUMAN]	12.97	2	2	2	185	20.5644	8.14795	0.984706	1.00143	1.07379	1.01997	0.787748	1.03435	1.05228	0.958128	1.06455	0.528085
P24593	Insulin-like growth factor-binding protein 5 OS=Homo sapiens GN=IGFBP5 PE=1 SV=1 - [IBP5_HUMAN]	15.07	4	4	4	272	30.55	8.20654	0.99252	1.01914	1.11096	1.04087	1.16439	0.925654	1.09179	1.06061	0.98139	0.81557
K7ESE8	Bleomycin hydrolase (Fragment) OS=Homo sapiens GN=BLMH PE=1 SV=1 - [K7ESE8_HUMAN]	5.63	1	1	2	231	26.7211	6.78564	1.14393	0.939707	1.01654	1.03339	0.92431	0.982644	0.965707	0.957554	1.0792	0.288538
D6RC54	Calpastatin (Fragment) OS=Homo sapiens GN=CAST PE=1 SV=1 - [D6RC54_HUMAN]	16.48	1	1	1	91	10.03	4.51318	1.23731	0.973716	0.794392	1.00181	1.19208	0.980708	0.928726	1.03384	0.969017	0.843148
Q9HBR0	Putative sodium-coupled neutral amino acid transporter 10 OS=Homo sapiens GN=SLC38A10 PE=1 SV=2 - [S38AA_HUMAN]	1.34	1	1	1	1119	119.687	5.73193	1.08905	0.935541	1.0273	1.01729	0.839044	0.989869	0.89831	0.909074	1.11904	0.15869
A8KAK1	cDNA FLJ77398, highly similar to Homo sapiens UDP-glucose ceramide glucosyltransferase-like 1, transcript variant 2, mRNA OS=Homo sapiens PE=2 SV=1 - [A8KAK1_HUMAN]	1.44	2	2	2	1531	174.897	5.51611	0.912977	1.04904	1.27205	1.07802	0.64169	1.05422	0.934211	0.876706	1.22963	0.279636
P43686	26S proteasome regulatory subunit 6B OS=Homo sapiens GN=PSMC4 PE=1 SV=2 - [PRS6B_HUMAN]	4.31	1	1	1	418	47.3365	5.21143	0.951362	0.945125	1.30149	1.06599	0.564066	0.858993	1.1265	0.849853	1.25432	0.341967
Q8N1N4	Keratin, type II cytoskeletal 78 OS=Homo sapiens GN=KRT78 PE=1 SV=2 - [K2C78_HUMAN]	5.38	1	4	6	520	56.8305	6.02393	1.46102	1.35251	0.92697	1.24683	0.860193	1.18095	0.840048	0.960396	1.29825	0.219353
B7Z6V5	cDNA FLJ50240, highly similar to ADAM DEC1 (EC 3.4.24.-) (Adisintegrin and metalloproteinase domain-like protein decysin 1) OS=Homo sapiens PE=2 SV=1 - [B7Z6V5_HUMAN]	7.16	2	2	2	391	43.5015	7.00537	1.09164	0.856628	0.939633	0.962633	1.05481	0.978656	1.10908	1.04751	0.91897	0.340521
D6W633	Protein tyrosine phosphatase, receptor type, S, isoform CRA_a OS=Homo sapiens GN=PTPRS PE=4 SV=1 - [D6W633_HUMAN]	2.44	2	2	2	1310	143.342	6.23975	0.956394	1.37646	0.694821	1.00923	1.19114	1.06598	0.891154	1.04943	0.961694	0.861897
B7ZLI0	Reticulon 4 receptor-like 2 OS=Homo sapiens GN=RTN4RL2 PE=2 SV=1 - [B7ZLI0_HUMAN]	3.81	2	2	2	420	46.1046	7.62061	0.983023	1.07672	1.11015	1.05663	1.00608	1.14262	1.03321	1.06064	0.996224	0.946865
E1U340	ZNF511/PRAP1 fusion protein OS=Homo sapiens PE=2 SV=1 - [E1U340_HUMAN]	13.55	3	3	3	310	35.1644	5.93506	1.01606	1.29489	0.891179	1.06737	1.16633	1.04069	1.09187	1.09963	0.970666	0.808773
B4DEK5	cDNA FLJ54596, highly similar to Proactivator polypeptide OS=Homo sapiens PE=2 SV=1 - [B4DEK5_HUMAN]	6.86	3	3	3	452	50.617	4.97021	1.10071	1.01119	0.938387	1.01676	0.998407	1.02163	1.02315	1.01439	1.00233	0.962736
Q496C9	D-aminoacyl-tRNA deacylase OS=Homo sapiens GN=DTD1 PE=2 SV=1 - [Q496C9_HUMAN]	3.35	1	1	1	209	23.469	8.35303	0.883974	1.04375	1.75227	1.22667	0.436532	0.965952	0.710842	0.704442	1.74133	0.164694
B4DLJ7	cDNA FLJ59334, highly similar to Transmembrane glycoprotein NMB OS=Homo sapiens PE=2 SV=1 - [B4DLJ7_HUMAN]	5.25	2	2	3	514	57.1758	6.771	0.98305	0.806279	0.776382	0.855237	1.22979	0.969034	1.30398	1.1676	0.732475	0.0602804
O00194	Ras-related protein Rab-27B OS=Homo sapiens GN=RAB27B PE=1 SV=4 - [RB27B_HUMAN]	9.63	2	2	2	218	24.5922	5.51611	0.783911	0.940257	1.44085	1.05501	0.529318	1.04269	1.31153	0.961179	1.09762	0.772394
P05556	Integrin beta-1 OS=Homo sapiens GN=ITGB1 PE=1 SV=2 - [ITB1_HUMAN]	6.64	5	5	6	798	88.357	5.38916	1.09579	0.934113	1.00559	1.01183	1.05878	0.943466	0.960154	0.987469	1.02467	0.700895
Q15828	Cystatin-M OS=Homo sapiens GN=CST6 PE=1 SV=1 - [CYTM_HUMAN]	14.09	2	2	2	149	16.5004	8.08936	0.999189	0.992936	1.04921	1.01378	0.983889	1.01425	1.01913	1.00576	1.00798	0.721218
B4DNX5	cDNA FLJ59941, highly similar to Drebrin-like protein OS=Homo sapiens PE=2 SV=1 - [B4DNX5_HUMAN]	26.62	3	3	4	139	15.5117	6.34131	0.994672	1.15138	1.28156	1.14254	0.619087	0.929047	0.848534	0.798889	1.43016	0.0508389
Q6AI18	Uncharacterized protein DKFZp686M148 (Fragment) OS=Homo sapiens GN=DKFZp686M148 PE=2 SV=1 - [Q6AI18_HUMAN]	14.19	2	2	3	155	16.3379	8.55811	1.00008	1.12735	1.08521	1.07088	0.758585	0.992639	0.965852	0.905692	1.18239	0.117077
B4E3Q1	cDNA FLJ61580, highly similar to Calsyntenin-1 OS=Homo sapiens PE=2 SV=1 - [B4E3Q1_HUMAN]	2.91	2	2	2	962	107.748	4.97021	1.13649	1.03736	1.00578	1.05988	1.08431	1.03978	0.955856	1.02665	1.03237	0.574901
M0R1A1	Syntaxin-binding protein 2 (Fragment) OS=Homo sapiens GN=STXBP2 PE=1 SV=1 - [M0R1A1_HUMAN]	7.73	2	2	3	220	24.6007	7.1665	0.928358	0.988486	1.32398	1.08027	0.422018	1.02534	0.919247	0.788869	1.3694	0.261375
Q9BS26	Endoplasmic reticulum resident protein 44 OS=Homo sapiens GN=ERP44 PE=1 SV=1 - [ERP44_HUMAN]	6.16	2	2	2	406	46.9414	5.26221	1.0932	1.08388	1.54231	1.2398	0.979305	1.27211	1.07715	1.10952	1.11742	0.495769
Q16627	C-C motif chemokine 14 OS=Homo sapiens GN=CCL14 PE=1 SV=1 - [CCL14_HUMAN]	19.35	2	2	4	93	10.6713	8.71924	1.11702	0.961748	0.870257	0.983009	1.1035	1.11624	1.27566	1.16514	0.843686	0.115512
B7Z6Y5	cDNA FLJ58696, highly similar to Endoglin OS=Homo sapiens PE=2 SV=1 - [B7Z6Y5_HUMAN]	5.88	3	3	5	476	51.121	7.28369	0.992951	0.820852	0.927738	0.913847	1.11347	1.03779	1.01494	1.0554	0.865874	0.0722429
Q7Z3B1	Neuronal growth regulator 1 OS=Homo sapiens GN=NEGR1 PE=1 SV=3 - [NEGR1_HUMAN]	3.67	1	1	1	354	38.6943	6.21436	1.16139	1.04769	0.874804	1.02796	1.13809	1.03185	1.00031	1.05675	0.97276	0.772749
Q86SQ4	Adhesion G-protein coupled receptor G6 OS=Homo sapiens GN=ADGRG6 PE=1 SV=3 - [AGRG6_HUMAN]	2.21	3	3	3	1221	136.607	7.86963	1.04703	1.01655	1.00981	1.02446	1.05977	1.0255	0.941198	1.00882	1.0155	0.694581
A5PKX5	Alpha-mannosidase OS=Homo sapiens GN=MAN2A1 PE=2 SV=1 - [A5PKX5_HUMAN]	3.41	5	5	5	1143	130.954	7.57666	1.02622	0.972457	0.979369	0.992681	0.974223	1.09581	1.02098	1.03034	0.963452	0.391461
B7Z2T1	cDNA FLJ58061, highly similar to Eukaryotic translation initiation factor 4E OS=Homo sapiens PE=2 SV=1 - [B7Z2T1_HUMAN]	8.09	1	1	1	136	16.279	5.90967	0.953744	1.18578	1.18053	1.10668	0.425229	1.00281	0.927887	0.78531	1.40923	0.177816
P26641	Elongation factor 1-gamma OS=Homo sapiens GN=EEF1G PE=1 SV=3 - [EF1G_HUMAN]	8.01	3	3	3	437	50.0871	6.66846	0.952859	1.07285	1.26175	1.09582	0.662967	1.08112	1.10941	0.951163	1.15209	0.442851
A0A172Q3A0	Fibroblast activation protein (Fragment) OS=Homo sapiens PE=2 SV=1 - [A0A172Q3A0_HUMAN]	2.05	1	2	15	733	84.8221	6.55127	1.04822	1.08027	0.884888	1.00446	1.08	1.12097	0.897777	1.03292	0.972448	0.771228
P28070	Proteasome subunit beta type-4 OS=Homo sapiens GN=PSMB4 PE=1 SV=4 - [PSB4_HUMAN]	3.79	1	1	1	264	29.1855	5.97314	0.922338	1.07348	1.05153	1.01578	0.762881	0.942542	1.05942	0.921614	1.10218	0.392277
Q7Z4G9	HBxAg-binding protein OS=Homo sapiens GN=HBXBP PE=2 SV=1 - [Q7Z4G9_HUMAN]	4.58	2	2	3	306	34.6328	6.29053	1.35593	1.07354	1.06249	1.16399	1.00134	0.851086	0.947134	0.933188	1.24732	0.0941471
Q14427	GM2-activator protein (Fragment) OS=Homo sapiens PE=2 SV=1 - [Q14427_HUMAN]	14.56	2	2	2	103	11.1297	4.75439	1.23026	0.946029	0.973263	1.04985	1.25245	0.988423	1.1463	1.12906	0.929848	0.541013
E9PP76	Copper chaperone for superoxide dismutase (Fragment) OS=Homo sapiens GN=CCS PE=1 SV=1 - [E9PP76_HUMAN]	19.12	1	1	1	68	7.28061	4.83057	1.07768	0.940461	1.31763	1.11193	0.790511	1.0058	0.874493	0.890267	1.24898	0.155306
P41226	Ubiquitin-like modifier-activating enzyme 7 OS=Homo sapiens GN=UBA7 PE=1 SV=2 - [UBA7_HUMAN]	1.58	1	1	1	1012	111.624	6.03662	0.96681	1.04819	1.0359	1.01697	0.59757	1.13389	0.913664	0.881708	1.15341	0.439391
K7EQ48	Glucose-6-phosphate isomerase OS=Homo sapiens GN=GPI PE=1 SV=2 - [K7EQ48_HUMAN]	9.49	6	6	10	474	53.3682	8.67529	0.906744	0.950919	1.19109	1.01625	0.707723	1.01372	0.92749	0.882979	1.15093	0.352877
Q9Y6Z7	Collectin-10 OS=Homo sapiens GN=COLEC10 PE=1 SV=2 - [COL10_HUMAN]	12.27	4	4	5	277	30.6853	7.32764	1.06075	1.08949	0.980428	1.04356	1.11054	1.01166	0.994007	1.03873	1.00464	0.926028
H0YMZ1	Proteasome subunit alpha type (Fragment) OS=Homo sapiens GN=PSMA4 PE=1 SV=8 - [H0YMZ1_HUMAN]	11.82	3	3	4	220	24.5104	6.771	1.0227	0.938314	1.00207	0.987696	0.848079	0.950807	1.06752	0.95547	1.03373	0.661591
Q8NC59	cDNA FLJ32620 fis, clone STOMA2000386, highly similar to TBC1 domain family member 1 OS=Homo sapiens PE=2 SV=1 - [Q8NC59_HUMAN]	4.15	1	1	2	265	30.7848	5.07178	1.16229	1.03625	0.997997	1.06551	1.33259	0.980219	0.949865	1.08756	0.979729	0.875904
P30086	Phosphatidylethanolamine-binding protein 1 OS=Homo sapiens GN=PEBP1 PE=1 SV=3 - [PEBP1_HUMAN]	16.58	3	3	4	187	21.0437	7.53271	0.942651	0.967577	1.23796	1.0494	0.689978	1.07311	0.926507	0.89653	1.17051	0.355003
C9J3N8	Heat shock protein beta-1 OS=Homo sapiens GN=HSPB1 PE=1 SV=1 - [C9J3N8_HUMAN]	27.03	1	1	1	37	3.88598	5.021	1.17489	0.93115	1.43868	1.18157	0.681524	0.743464	1.49297	0.972653	1.2148	0.523385
B4DTV3	cDNA FLJ57199, highly similar to Probable G-protein coupled receptor 116 OS=Homo sapiens PE=2 SV=1 - [B4DTV3_HUMAN]	4.55	4	4	4	901	99.5245	7.38623	1.10035	1.15484	0.868602	1.04126	1.16685	0.885458	0.978563	1.01029	1.03066	0.810025
P00390	Glutathione reductase, mitochondrial OS=Homo sapiens GN=GSR PE=1 SV=2 - [GSHR_HUMAN]	5.56	3	3	5	522	56.221	8.49951	1.06141	0.936153	1.15063	1.0494	1.00243	0.946924	0.972841	0.974065	1.07734	0.305989
Q9BZQ0	Follistatin-related protein (Fragment) OS=Homo sapiens PE=2 SV=1 - [Q9BZQ0_HUMAN]	9.52	1	1	1	126	14.3257	4.70361	1.29684	1.07339	0.955866	1.1087	0.764681	1.17045	0.82671	0.920615	1.2043	0.307633
B7ZMJ3	ADAMTSL4 protein OS=Homo sapiens GN=ADAMTSL4 PE=2 SV=1 - [B7ZMJ3_HUMAN]	2.71	3	3	3	1035	111.96	8.27979	1.18035	1.10102	1.19717	1.15951	1.05342	0.985577	0.818304	0.952433	1.21742	0.0525258
P14174	Macrophage migration inhibitory factor OS=Homo sapiens GN=MIF PE=1 SV=4 - [MIF_HUMAN]	7.83	1	1	2	115	12.4682	7.88428	0.920734	1.05982	1.14668	1.04241	0.59912	1.08347	0.977699	0.886764	1.17552	0.388631
P35579	Myosin-9 OS=Homo sapiens GN=MYH9 PE=1 SV=4 - [MYH9_HUMAN]	1.07	2	2	2	1960	226.392	5.60498	0.72839	0.718623	1.74547	1.06416	0.707089	1.13303	1.47538	1.10516	0.9629	0.924555
I6L8B7	Fatty acid-binding protein, epidermal OS=Homo sapiens GN=FABP5 PE=1 SV=1 - [I6L8B7_HUMAN]	8.91	1	1	1	101	11.2495	6.07471	1.03854	1.01163	1.62483	1.225	0.544386	0.9405	1.32868	0.937855	1.30617	0.395735
B4DZX0	cDNA FLJ52898, highly similar to Nucleobindin-1 OS=Homo sapiens PE=2 SV=1 - [B4DZX0_HUMAN]	8.39	3	3	3	441	51.5892	5.31299	1.18683	0.895763	1.14719	1.0766	1.14476	0.879149	0.96538	0.996428	1.08045	0.541014
B4DKJ4	cDNA FLJ57738, highly similar to Translationally-controlled tumor protein OS=Homo sapiens PE=2 SV=1 - [B4DKJ4_HUMAN]	14.79	2	2	2	142	16.0938	4.67822	1.0693	1.00165	1.35986	1.1436	0.489022	0.91302	0.938604	0.780215	1.46575	0.117374
A0A0A0MS15	Immunoglobulin heavy variable 3-49 OS=Homo sapiens GN=IGHV3-49 PE=3 SV=1 - [HV349_HUMAN]	7.56	1	1	1	119	13.0475	8.6167	0.24285	0.0933578		0.168104	1.03116	1.30547	2.56193	1.63285	0.102951	0.0960783
Q75MU1	Uncharacterized protein WBSCR1 (Fragment) OS=Homo sapiens GN=WBSCR1 PE=4 SV=1 - [Q75MU1_HUMAN]	14.71	2	2	2	136	14.9513	5.42725	0.939001	1.08506	1.55453	1.19286	0.549673	0.977051	0.941893	0.822872	1.44963	0.184089
B3KTG4	cDNA FLJ38197 fis, clone FCBBF1000367, highly similar to Ubiquitin carboxyl-terminal hydrolase 14 (EC 3.1.2.15) OS=Homo sapiens PE=2 SV=1 - [B3KTG4_HUMAN]	5.6	2	2	2	375	42.6867	7.53271	1.0217	1.03347	1.14204	1.06574	0.64991	1.00644	0.953171	0.869839	1.22521	0.170672
B1AP15	CD55 antigen, decay accelerating factor for complement (Cromer blood group), isoform CRA_d OS=Homo sapiens GN=CD55 PE=1 SV=1 - [B1AP15_HUMAN]	5.05	2	2	2	317	34.0118	6.37939	1.1488	0.864082	1.03199	1.01496	1.19836	1.00003	0.990517	1.06297	0.954833	0.676475
K7ELP0	Tropomyosin alpha-4 chain (Fragment) OS=Homo sapiens GN=TPM4 PE=1 SV=1 - [K7ELP0_HUMAN]	62.32	1	5	6	69	8.01803	5.0083	0.880735	0.898946	1.49643	1.09204	0.683436	0.942514	0.902254	0.842735	1.29583	0.315988
I3L3Q4	Glyoxalase domain-containing protein 4 (Fragment) OS=Homo sapiens GN=GLOD4 PE=1 SV=1 - [I3L3Q4_HUMAN]	8.81	2	2	2	227	25.4836	7.00537	0.973567	1.0712	1.25395	1.09957	0.73104	0.982686	1.03285	0.915524	1.20103	0.213048
C9JUG7	F-actin-capping protein subunit alpha-2 OS=Homo sapiens GN=CAPZA2 PE=1 SV=1 - [C9JUG7_HUMAN]	15.07	1	2	3	146	16.6883	5.10986	1.05368	1.10246	1.05709	1.07108	0.800648	0.990303	1.05115	0.947368	1.13058	0.183662
H0YAP2	Polyadenylate-binding protein 1 (Fragment) OS=Homo sapiens GN=PABPC1 PE=1 SV=1 - [H0YAP2_HUMAN]	7.63	1	1	1	131	15.1459	9.64209	1.01395	1.17191	1.63465	1.2735	0.38263	1.08087	0.925036	0.796178	1.59952	0.165658
Q5JXI8	Four and a half LIM domains protein 1 (Fragment) OS=Homo sapiens GN=FHL1 PE=1 SV=1 - [Q5JXI8_HUMAN]	14.79	4	4	5	257	29.1405	8.26514	0.78657	0.959396	0.984917	0.910294	0.748467	1.11009	1.10652	0.988361	0.921014	0.59451
K7ERZ3	Perilipin-3 (Fragment) OS=Homo sapiens GN=PLIN3 PE=1 SV=1 - [K7ERZ3_HUMAN]	9.25	2	2	2	292	31.9632	5.13525	0.984062	0.974742	1.08405	1.01428	0.770227	1.03723	0.814454	0.873971	1.16054	0.192905
F5H0D2	Coronin (Fragment) OS=Homo sapiens GN=CORO1B PE=1 SV=2 - [F5H0D2_HUMAN]	6.47	1	1	1	139	15.2738	6.88818	0.871265	0.97385	1.4256	1.09024	0.613797	1.0673	1.02481	0.90197	1.20873	0.446809
B5MBZ8	Protein phosphatase 1 regulatory subunit 7 OS=Homo sapiens GN=PPP1R7 PE=1 SV=1 - [B5MBZ8_HUMAN]	6.57	1	1	1	274	31.338	4.62744	0.875169	0.96886	0.787315	0.877114	0.881507	1.14302	1.11947	1.048	0.836942	0.158135
P23381	Tryptophan--tRNA ligase, cytoplasmic OS=Homo sapiens GN=WARS PE=1 SV=2 - [SYWC_HUMAN]	1.7	1	1	1	471	53.1316	6.22705	1.02626	1.04385	1.18364	1.08458	0.889901	1.06209	0.95526	0.969084	1.11918	0.177639
S4R457	Heterogeneous nuclear ribonucleoprotein K OS=Homo sapiens GN=HNRNPK PE=1 SV=1 - [S4R457_HUMAN]	10.39	1	1	1	77	8.78126	4.88135	0.981901	1.03403	1.51217	1.17603	0.630311	0.984471	1.00143	0.872069	1.34856	0.217044
B3KXC5	cDNA FLJ45164 fis, clone BRAWH3044151, highly similar to Homo sapiens ADAMTS-like 2 (ADAMTSL2), mRNA OS=Homo sapiens PE=2 SV=1 - [B3KXC5_HUMAN]	5.26	2	2	3	380	42.4513	7.07861	1.33349	1.0432	1.04161	1.13943	1.09726	1.0249	1.10338	1.07518	1.05976	0.556451
B4DNR3	cDNA FLJ52710, highly similar to Abhydrolase domain-containing protein 14B OS=Homo sapiens PE=2 SV=1 - [B4DNR3_HUMAN]	7.03	1	1	1	185	19.7842	6.40479	1.0729	0.956261	1.33036	1.11984	0.823397	0.852547	0.981572	0.885839	1.26416	0.124629
I3L3E9	Flap endonuclease 1 (Fragment) OS=Homo sapiens GN=FEN1 PE=1 SV=1 - [I3L3E9_HUMAN]	4.55	1	1	1	154	17.8983	5.90967	1.09151	1.00579	1.43314	1.17681	0.929472	0.996597	0.922366	0.949479	1.23943	0.161737
D6R9R8	Interleukin-6 receptor subunit alpha (Fragment) OS=Homo sapiens GN=IL6R PE=1 SV=8 - [D6R9R8_HUMAN]	4.71	1	1	1	170	17.8883	8.76318	1.15722	1.21343	0.91971	1.09679	1.05867	0.995237	0.996686	1.01686	1.0786	0.435885
P25774	Cathepsin S OS=Homo sapiens GN=CTSS PE=1 SV=3 - [CATS_HUMAN]	5.44	2	2	2	331	37.4713	8.33838	0.956428	1.03413	1.03763	1.0094	1.03067	1.09575	0.984632	1.03702	0.973368	0.544271
B2R960	cDNA, FLJ94230, highly similar to Homo sapiens thioredoxin-like 1 (TXNL1), mRNA OS=Homo sapiens PE=2 SV=1 - [B2R960_HUMAN]	10.73	2	2	2	289	32.2167	4.95752	1.01687	0.988749	1.28757	1.09773	0.614832	1.10721	0.986981	0.903009	1.21564	0.331075
H3BR99	Synaptosomal-associated protein 23 (Fragment) OS=Homo sapiens GN=SNAP23 PE=1 SV=1 - [H3BR99_HUMAN]	11.11	1	1	1	90	10.2741	6.52197	1.02202	1.08353	1.23504	1.11353	0.708236	0.995297	0.97384	0.892458	1.24771	0.11948
Q05DH1	Proteasome subunit alpha type (Fragment) OS=Homo sapiens GN=PSMA7 PE=2 SV=1 - [Q05DH1_HUMAN]	13.45	3	3	3	238	26.6971	8.86572	1.09754	1.05228	0.99311	1.04764	0.810213	0.904681	0.999466	0.904787	1.15789	0.0840544
Q96H15	T-cell immunoglobulin and mucin domain-containing protein 4 OS=Homo sapiens GN=TIMD4 PE=1 SV=2 - [TIMD4_HUMAN]	1.85	1	1	2	378	41.5518	6.1001	1.41968	0.979965	0.975216	1.12495	1.05997	0.937508	0.99911	0.998862	1.12623	0.452192
M0QZK8	Uncharacterized protein OS=Homo sapiens PE=4 SV=1 - [M0QZK8_HUMAN]	9.71	1	1	1	103	11.5708	4.91943	0.886358	1.07835	1.50478	1.1565	0.697987	0.846132	0.962289	0.835469	1.38425	0.180447
F2Z2K0	NSFL1 cofactor p47 OS=Homo sapiens GN=NSFL1C PE=1 SV=1 - [F2Z2K0_HUMAN]	9.85	2	2	2	274	30.2019	5.09717	1.18801	0.939617	0.99288	1.04017	0.477612	1.07986	0.926487	0.827987	1.25626	0.339547
B4DMV9	cDNA FLJ53363, highly similar to EH-domain-containing protein 1 OS=Homo sapiens PE=2 SV=1 - [B4DMV9_HUMAN]	5.68	1	3	3	475	53.7352	7.40088	0.925291	0.986163	1.3637	1.09172	0.718479	1.05439	0.972737	0.915202	1.19287	0.358745
Q59FI0	Aconitase 1 variant (Fragment) OS=Homo sapiens PE=3 SV=1 - [Q59FI0_HUMAN]	1.02	1	1	1	781	86.2231	6.27783	0.971513	0.938658	1.36284	1.091	0.646128	1.07768	0.998828	0.907544	1.20215	0.38933
B7Z2R3	cDNA FLJ59510, highly similar to Homo sapiens tight junction protein 2 (TJP2), transcript variant 2, mRNA OS=Homo sapiens PE=2 SV=1 - [B7Z2R3_HUMAN]	1.08	1	1	1	1020	115.112	6.7124	1.151	0.967605	1.51652	1.21171	0.521248	0.883445	1.21037	0.871687	1.39007	0.255137
B5BU41	Calcium/calmodulin-dependent protein kinase I OS=Homo sapiens GN=CAMK1 PE=2 SV=1 - [B5BU41_HUMAN]	3.51	1	1	1	370	41.2527	5.35107	0.886554	0.991957	1.23924	1.03925	0.661089	1.16549	0.782804	0.869795	1.19482	0.410217
G3V4X5	Proteasome endopeptidase complex OS=Homo sapiens GN=PSMA3 PE=1 SV=1 - [G3V4X5_HUMAN]	8.89	2	2	2	180	20.275	5.09717	1.06981	1.03307	1.08574	1.06287	0.773779	1.01452	0.935513	0.907937	1.17065	0.0995676
Q68DY8	Uncharacterized protein DKFZp686I11137 OS=Homo sapiens GN=DKFZp686I11137 PE=2 SV=1 - [Q68DY8_HUMAN]	2.55	1	1	1	667	73.2843	5.2876	1.15653	1.08171	0.950642	1.06296	1.18577	1.00216	1.09585	1.09459	0.971101	0.713352
D3DSC5	Neural cell adhesion molecule 2, isoform CRA_a (Fragment) OS=Homo sapiens GN=NCAM2 PE=4 SV=1 - [D3DSC5_HUMAN]	1.22	1	1	1	818	90.9951	5.60498	1.14124	1.0161	1.11928	1.09221	0.846516	1.11029	0.91401	0.956938	1.14136	0.199139
A0A1B0GVK0	Fibroleukin OS=Homo sapiens GN=FGL2 PE=1 SV=1 - [A0A1B0GVK0_HUMAN]	4	1	1	1	225	25.3467	5.52881	1.33395	0.996923	1.09469	1.14185	0.911515	1.03474	0.909646	0.951967	1.19947	0.154493
A0A068LN03	Ig heavy chain variable region (Fragment) OS=Homo sapiens PE=2 SV=1 - [A0A068LN03_HUMAN]	15	1	2	8	120	13.3755	8.42627	0.57054	0.423554	0.48737	0.493821	1.04003	0.990218	2.00388	1.34471	0.367233	0.0627678
A0A024R599	Solute carrier family 3 (Activators of dibasic and neutral amino acid transport), member 2, isoform CRA_e OS=Homo sapiens GN=SLC3A2 PE=4 SV=1 - [A0A024R599_HUMAN]	6.53	3	3	3	398	43.4916	5.49072	1.15541	1.12892	0.947389	1.07724	1.10876	0.937246	0.949922	0.998643	1.0787	0.41023
Q14126	Desmoglein-2 OS=Homo sapiens GN=DSG2 PE=1 SV=2 - [DSG2_HUMAN]	6.26	7	7	9	1118	122.218	5.23682	1.14333	0.97545	1.00432	1.04103	1.05177	0.923157	1.06018	1.0117	1.02899	0.689318
B4DPP0	cDNA FLJ51032, highly similar to CD9 antigen OS=Homo sapiens PE=2 SV=1 - [B4DPP0_HUMAN]	4.96	1	1	2	141	15.8952	6.7417	0.881029	1.23049	1.35545	1.15566	0.575575	1.02193	0.692623	0.763375	1.51388	0.114526
D6RGW0	Endoplasmic reticulum aminopeptidase 2 (Fragment) OS=Homo sapiens GN=ERAP2 PE=1 SV=1 - [D6RGW0_HUMAN]	1.15	1	1	1	694	79.6811	6.27783	1.09345	0.875351	0.958987	0.97593	1.54373	1.00829	1.11077	1.22093	0.799335	0.236219
A0A024R2W4	Dystroglycan 1 (Dystrophin-associated glycoprotein 1), isoform CRA_a OS=Homo sapiens GN=DAG1 PE=4 SV=1 - [A0A024R2W4_HUMAN]	3.69	3	3	3	895	97.4797	8.55811	1.06873	1.02639	0.770573	0.95523	1.12578	1.05757	1.08128	1.08821	0.877798	0.235198
P07942	Laminin subunit beta-1 OS=Homo sapiens GN=LAMB1 PE=1 SV=2 - [LAMB1_HUMAN]	2.24	3	3	4	1786	197.909	4.94482	1.12202	0.971582	0.92696	1.00685	0.642421	0.969489	0.873293	0.828401	1.21542	0.191234
Q99650	Oncostatin-M-specific receptor subunit beta OS=Homo sapiens GN=OSMR PE=1 SV=1 - [OSMR_HUMAN]	1.02	1	1	1	979	110.438	5.8208	1.19877	1.03173	1.12072	1.11707	1.0833	0.986581	0.806985	0.958957	1.16488	0.168706
A0A1W2PRU0	Alpha-endosulfine OS=Homo sapiens GN=ENSA PE=1 SV=1 - [A0A1W2PRU0_HUMAN]	11.76	1	1	1	119	13.1246	6.17627	0.872244	1.25142	0.960899	1.02819	0.596609	0.897044	0.943451	0.812368	1.26567	0.243452
A2VDJ4	GNPTG protein (Fragment) OS=Homo sapiens GN=GNPTG PE=2 SV=1 - [A2VDJ4_HUMAN]	3.42	1	1	1	292	32.9384	6.78564	1.15386	0.899871	0.962863	1.00553	1.26204	1.01069	0.927577	1.06677	0.942596	0.653018
A0A087WSY6	Immunoglobulin kappa variable 3D-15 OS=Homo sapiens GN=IGKV3D-15 PE=3 SV=6 - [KVD15_HUMAN]	13.91	1	2	5	115	12.5263	5.18604	0.654823	0.931461	0.351706	0.645997	1.25996	0.994402	1.42661	1.22699	0.526489	0.0501282
C9JMK5	Phosphoinositide-3-kinase-interacting protein 1 (Fragment) OS=Homo sapiens GN=PIK3IP1 PE=1 SV=8 - [C9JMK5_HUMAN]	7.64	1	1	1	144	15.9927	7.89893	1.24489	0.880009	1.17381	1.09957	1.04591	1.00522	1.05192	1.03435	1.06306	0.593617
Q96N83	Podocalyxin OS=Homo sapiens PE=2 SV=1 - [Q96N83_HUMAN]	2.51	1	1	1	518	54.543	5.57959	1.23497	1.10807	0.901695	1.08158	0.977134	0.908292	0.996938	0.960788	1.12572	0.296781
A0A087WYC1	Heat shock 70 kDa protein 4 OS=Homo sapiens GN=HSPA4 PE=1 SV=1 - [A0A087WYC1_HUMAN]	2.72	2	2	2	699	78.5562	5.17334	0.949042	1.06962	1.18575	1.06814	0.748754	0.984553	0.92206	0.885122	1.20677	0.135833
H0YA83	Beta-hexosaminidase subunit beta (Fragment) OS=Homo sapiens GN=HEXB PE=1 SV=1 - [H0YA83_HUMAN]	5.88	1	1	1	170	19.5099	5.70654	0.946946	1.02822	1.07141	1.01553	1.17241	1.01848	0.995013	1.06197	0.956268	0.523587
H0YI43	Myosin light polypeptide 6 (Fragment) OS=Homo sapiens GN=MYL6 PE=1 SV=1 - [H0YI43_HUMAN]	15.66	1	1	1	83	9.24322	4.77979	0.822024	0.794756	1.70219	1.10632	0.477422	1.1546	1.3179	0.983308	1.1251	0.770323
Q06323	Proteasome activator complex subunit 1 OS=Homo sapiens GN=PSME1 PE=1 SV=1 - [PSME1_HUMAN]	3.21	1	1	1	249	28.705	6.02393	0.981796	0.970418	1.3571	1.1031	0.783399	0.947952	0.95989	0.89708	1.22966	0.213009
Q8TE63	Immunglobulin light chain variable region (Fragment) OS=Homo sapiens PE=2 SV=1 - [Q8TE63_HUMAN]	22.73	1	3	11	110	11.4717	8.90967	0.698603	0.532795	0.500877	0.577425	1.03392	0.87078	1.64639	1.1837	0.487815	0.0678048
P01137	Transforming growth factor beta-1 OS=Homo sapiens GN=TGFB1 PE=1 SV=2 - [TGFB1_HUMAN]	4.1	2	2	2	390	44.3128	8.52881	0.841735	1.07866	1.23918	1.05319	0.692158	0.947851	1.02007	0.886693	1.18777	0.335957
B4DSX2	cDNA FLJ60144, highly similar to Complement component C1q receptor OS=Homo sapiens PE=2 SV=1 - [B4DSX2_HUMAN]	3.17	1	1	1	347	36.5906	6.29053	1.45033	1.07128	0.908667	1.14343	1.05122	1.00555	1.0017	1.01949	1.12156	0.485028
Q53R53	Uncharacterized protein MERTK (Fragment) OS=Homo sapiens GN=MERTK PE=4 SV=1 - [Q53R53_HUMAN]	1.94	1	1	1	567	63.006	5.33838	1.09811	0.979661	1.04494	1.04091	1.22239	1.00537	0.913084	1.04695	0.994227	0.95372
Q8WWZ8	Oncoprotein-induced transcript 3 protein OS=Homo sapiens GN=OIT3 PE=1 SV=2 - [OIT3_HUMAN]	1.28	1	1	1	545	59.9825	5.57959	2.54426	0.799408	0.815049	1.38624	1.02482	0.842824	0.956927	0.941524	1.47234	0.487005
K7EP07	Tubulin-folding cofactor B (Fragment) OS=Homo sapiens GN=TBCB PE=1 SV=8 - [K7EP07_HUMAN]	6.51	1	1	1	169	19.2394	5.33838	1.02808	0.899152	1.50541	1.14421	0.673721	1.04379	0.989622	0.902377	1.268	0.32855
E9PLD0	Ras-related protein Rab-1B OS=Homo sapiens GN=RAB1B PE=1 SV=1 - [E9PLD0_HUMAN]	13.02	2	3	4	169	18.4714	5.71924	0.94505	1.02056	1.29562	1.08708	0.57281	1.02866	0.956956	0.85281	1.2747	0.256534
E5RGQ7	Dematin (Fragment) OS=Homo sapiens GN=DMTN PE=1 SV=1 - [E5RGQ7_HUMAN]	8.11	1	1	1	148	16.7557	8.88037	0.897915	0.981921	1.09552	0.991785	0.835865	1.01325	1.02014	0.956419	1.03698	0.692514
Q9HB00	Desmocollin 1, isoform CRA_b OS=Homo sapiens GN=DSC1 PE=4 SV=1 - [Q9HB00_HUMAN]	4.88	4	4	4	840	93.776	5.52881	1.10245	0.996692	0.812227	0.970458	1.01496	1.02258	1.07088	1.03614	0.936611	0.490386
A0A0U1RQQ4	Endothelial protein C receptor (Fragment) OS=Homo sapiens GN=PROCR PE=1 SV=1 - [A0A0U1RQQ4_HUMAN]	10.33	2	2	4	213	24.3793	6.94678	1.13378	1.19674	0.947926	1.09281	1.08507	0.994878	0.882037	0.987328	1.10684	0.329154
Q8WZ75	Roundabout homolog 4 OS=Homo sapiens GN=ROBO4 PE=1 SV=1 - [ROBO4_HUMAN]	7.85	5	5	6	1007	107.39	6.63916	1.23313	0.921935	0.77916	0.978073	1.1554	1.08479	1.03248	1.09089	0.896586	0.46157
P80511	Protein S100-A12 OS=Homo sapiens GN=S100A12 PE=1 SV=2 - [S10AC_HUMAN]	16.3	2	2	2	92	10.5685	6.25244	0.879984	0.849425	1.00441	0.911273	0.668227	1.24122	1.37809	1.09585	0.83157	0.453499
E9PQ40	Fibroblast growth factor receptor 1 (Fragment) OS=Homo sapiens GN=FGFR1 PE=1 SV=1 - [E9PQ40_HUMAN]	9.41	1	1	2	85	9.53357	4.62744	1.11256	1.01944	0.899528	1.01051	1.18317	1.0623	0.997979	1.08115	0.934662	0.438336
Q7Z7M0	Multiple epidermal growth factor-like domains protein 8 OS=Homo sapiens GN=MEGF8 PE=1 SV=2 - [MEGF8_HUMAN]	1.62	5	5	6	2845	302.902	6.87354	1.16656	1.01913	1.17558	1.12043	1.01256	0.926804	0.964079	0.967815	1.15769	0.0539402
F8VX93	Dynactin subunit 2 (Fragment) OS=Homo sapiens GN=DCTN2 PE=1 SV=1 - [F8VX93_HUMAN]	5.93	1	1	1	135	15.106	6.34131	0.932126	1.00378	1.06883	1.00158	0.590585	1.00946	1.0262	0.875415	1.14412	0.441602
B7Z462	cDNA FLJ58016, highly similar to Polypeptide N-acetylgalactosaminyltransferase2 (EC 2.4.1.41) OS=Homo sapiens PE=2 SV=1 - [B7Z462_HUMAN]	5.28	2	2	2	360	40.7514	8.26514	1.01267	1.02743	0.968441	1.00285	1.05381	1.14336	0.9778	1.05832	0.947584	0.338066
A0A0F7SZ86	IGHV2-70 protein (Fragment) OS=Homo sapiens GN=IGHV2-70 PE=4 SV=1 - [A0A0F7SZ86_HUMAN]	23.33	1	2	5	90	10.156	7.95752	0.478481	0.296101	0.192727	0.322436	0.45272	1.34263	1.48944	1.09493	0.294482	0.0820792
R4GN98	Protein S100 (Fragment) OS=Homo sapiens GN=S100A6 PE=1 SV=1 - [R4GN98_HUMAN]	25.88	3	3	7	85	9.67506	5.45264	0.974905	1.0863	1.16065	1.07395	0.596263	1.02849	0.954752	0.859834	1.24902	0.211218
F8WAM2	T-complex protein 1 subunit eta (Fragment) OS=Homo sapiens GN=CCT7 PE=1 SV=1 - [F8WAM2_HUMAN]	19.39	2	2	2	98	10.4878	7.41553	1.00178	1.0024	1.11473	1.03964	0.901947	1.121	1.00685	1.00993	1.02941	0.706983
P30530	Tyrosine-protein kinase receptor UFO OS=Homo sapiens GN=AXL PE=1 SV=3 - [UFO_HUMAN]	0.78	1	1	2	894	98.273	5.42725	1.16487	0.809225	1.29614	1.09008	1.00974	0.928429	0.926554	0.954908	1.14156	0.412779
F2Z2Q9	Low molecular weight phosphotyrosine protein phosphatase OS=Homo sapiens GN=ACP1 PE=1 SV=1 - [F2Z2Q9_HUMAN]	12.86	1	1	2	70	7.4958	5.10986	1.01681	1.05465	1.04549	1.03898	0.81822	1.05996	1.00261	0.960264	1.08197	0.346304
D6RDU5	Septin-11 (Fragment) OS=Homo sapiens GN=SEPT11 PE=1 SV=1 - [D6RDU5_HUMAN]	17.74	5	6	7	372	43.0859	6.30322	1.01108	0.985465	1.22322	1.07326	0.687702	0.933665	0.979251	0.866873	1.23808	0.154643
B4DV98	cDNA FLJ53522, highly similar to Homo sapiens mucin and cadherin-like (MUCDHL), transcript variant 3, mRNA OS=Homo sapiens PE=2 SV=1 - [B4DV98_HUMAN]	1.55	1	1	1	644	68.8288	4.84326	1.07972	0.976047	0.979782	1.01185	0.952633	1.00989	0.98983	0.984116	1.02818	0.504555
B3KXM9	cDNA FLJ45746 fis, clone KIDNE2018727, highly similar to Uromodulin OS=Homo sapiens PE=2 SV=1 - [B3KXM9_HUMAN]	4.44	2	2	2	428	47.3398	6.7417	1.12626	0.989633	1.08153	1.06581	1.02377	0.976173	0.9892	0.99638	1.06968	0.178889
J3QRA3	Na(+)/H(+) exchange regulatory cofactor NHE-RF1 (Fragment) OS=Homo sapiens GN=SLC9A3R1 PE=1 SV=1 - [J3QRA3_HUMAN]	20	1	1	1	35	4.05595	4.88135	0.876668	1.00571	1.6092	1.16386	0.424115	0.954865	0.932481	0.770487	1.51055	0.2391
M0R0Y2	Alpha-soluble NSF attachment protein OS=Homo sapiens GN=NAPA PE=1 SV=1 - [M0R0Y2_HUMAN]	8.98	2	2	2	256	29.1443	5.16064	1.01685	1.00372	1.29596	1.10551	0.578307	1.17939	0.9202	0.892634	1.23848	0.343809
P03973	Antileukoproteinase OS=Homo sapiens GN=SLPI PE=1 SV=2 - [SLPI_HUMAN]	5.3	1	1	1	132	14.3159	8.74854	1.06152	0.967898	1.09288	1.04076	1.04414	0.969301	1.17027	1.06124	0.980711	0.783384
B4E143	cDNA FLJ58084, highly similar to Receptor-type tyrosine-protein phosphatase mu (EC 3.1.3.48) OS=Homo sapiens PE=2 SV=1 - [B4E143_HUMAN]	2.95	3	3	3	847	94.051	7.31299	1.06877	1.02666	0.933269	1.00957	1.14324	0.963103	0.972216	1.02618	0.983806	0.826337
P11766	Alcohol dehydrogenase class-3 OS=Homo sapiens GN=ADH5 PE=1 SV=4 - [ADHX_HUMAN]	4.28	2	2	2	374	39.6984	7.48877	0.997687	1.01784	1.08659	1.03404	0.534058	1.07339	0.970803	0.859418	1.20319	0.356106
G5E968	Chromogranin A (Parathyroid secretory protein 1), isoform CRA_b OS=Homo sapiens GN=CHGA PE=1 SV=1 - [G5E968_HUMAN]	22.22	4	4	4	306	34.2481	4.94482	1.19178	1.39456	0.965949	1.1841	0.912799	0.983506	0.91917	0.938492	1.2617	0.122697
A0A024QZV0	HCG1811539, isoform CRA_b OS=Homo sapiens GN=hCG_1811539 PE=3 SV=1 - [A0A024QZV0_HUMAN]	9.57	2	3	5	324	36.155	5.46533	0.93767	0.802935	1.2718	1.00414	0.842068	1.13455	0.867053	0.94789	1.05934	0.754443
Q9H3K6	BolA-like protein 2 OS=Homo sapiens GN=BOLA2 PE=1 SV=1 - [BOLA2_HUMAN]	18.6	1	1	1	86	10.1102	6.52197	0.938854	1.03814	1.01429	0.997094	0.851643	0.974647	0.935744	0.920678	1.083	0.179609
A7MBN2	TNC protein OS=Homo sapiens GN=TNC PE=2 SV=1 - [A7MBN2_HUMAN]	4.26	7	7	8	1927	210.355	4.98291	1.01997	1.00892	0.945746	0.991543	1.049	1.00425	1.0982	1.05048	0.943894	0.173574
A0A1B0GTV0	Methyl-CpG-binding protein 2 (Fragment) OS=Homo sapiens GN=MECP2 PE=1 SV=1 - [A0A1B0GTV0_HUMAN]	15.09	1	1	1	53	6.07449	9.90576	0.89014	1.03857	0.888373	0.939027	1.20383	0.922519	1.02894	1.05177	0.89281	0.305083
W6MEN4	Beta-1,4-galactosyltransferase 1 OS=Homo sapiens GN=B4GALT1 PE=2 SV=1 - [W6MEN4_HUMAN]	3.65	1	1	1	219	23.3602	8.99756	1.3096	1.05437	0.893262	1.08575	1.10305	1.06582	1.07237	1.08041	1.00494	0.967147
H0YDG0	Puromycin-sensitive aminopeptidase (Fragment) OS=Homo sapiens GN=NPEPPS PE=1 SV=1 - [H0YDG0_HUMAN]	13.02	2	2	2	169	19.04	7.44482	0.95435	0.969745	1.18124	1.03511	0.830093	0.913051	0.94308	0.895408	1.15602	0.158156
P50453	Serpin B9 OS=Homo sapiens GN=SERPINB9 PE=1 SV=1 - [SPB9_HUMAN]	7.98	3	3	3	376	42.3763	5.85889	1.13726	0.941322	1.05784	1.04547	0.918184	1.15125	1.07364	1.04769	0.997885	0.981343
Q9Y608	Leucine-rich repeat flightless-interacting protein 2 OS=Homo sapiens GN=LRRFIP2 PE=1 SV=1 - [LRRF2_HUMAN]	3.19	2	2	2	721	82.1213	6.94678	1.07941	0.937507	1.58374	1.20022	0.571464	1.03782	0.971271	0.860186	1.3953	0.236288
A3KFI2	Neuroblastoma suppressor of tumorigenicity 1 (Fragment) OS=Homo sapiens GN=NBL1 PE=1 SV=1 - [A3KFI2_HUMAN]	12.84	2	2	2	109	11.8488	5.73193	1.10362	0.888374	0.988823	0.993605	1.25189	1.05092	1.16792	1.15691	0.858842	0.127819
Q7L576	Cytoplasmic FMR1-interacting protein 1 OS=Homo sapiens GN=CYFIP1 PE=1 SV=1 - [CYFP1_HUMAN]	1.84	2	2	2	1253	145.089	6.90283	0.9173	1.14052	1.13026	1.0627	0.718684	1.0806	0.898835	0.899374	1.18159	0.268846
K7EIW7	Platelet glycoprotein VI (Fragment) OS=Homo sapiens GN=GP6 PE=1 SV=1 - [K7EIW7_HUMAN]	12.82	2	2	2	117	12.9923	8.89502	0.926733	0.966339	1.34023	1.07777	0.611613	0.991814	0.808194	0.803874	1.34072	0.185439
V9HW76	Epididymis secretory protein Li 300 OS=Homo sapiens GN=HEL-S-300 PE=2 SV=1 - [V9HW76_HUMAN]	6.73	2	2	3	223	25.4147	7.45947	1.026	1.08078	0.890976	0.999249	1.10729	1.08014	1.01352	1.06699	0.936516	0.342171
B4DUJ3	cDNA FLJ52895, highly similar to Carbonic anhydrase 3 (EC 4.2.1.1) OS=Homo sapiens PE=2 SV=1 - [B4DUJ3_HUMAN]	7.66	2	2	2	235	26.7905	8.30908	0.997267	0.907002	0.901845	0.935371	1.06139	0.976593	1.31465	1.11754	0.836989	0.161331
P46109	Crk-like protein OS=Homo sapiens GN=CRKL PE=1 SV=1 - [CRKL_HUMAN]	7.59	2	2	2	303	33.7559	6.7417	0.742323	0.892932	1.34124	0.992164	0.537282	0.516327	0.442029	0.498546	1.99012	0.0535622
B4DF17	cDNA FLJ59187, highly similar to Multiple coagulation factor deficiency protein 2 homolog OS=Homo sapiens PE=2 SV=1 - [B4DF17_HUMAN]	13.39	1	1	1	127	14.3948	4.91943	0.957475	1.07692	1.01656	1.01698	0.538851	1.03843	0.97314	0.850141	1.19625	0.357344
Q53G89	Elongation factor 1-alpha (Fragment) OS=Homo sapiens PE=2 SV=1 - [Q53G89_HUMAN]	5.77	3	3	3	433	46.8644	9.11475	0.992714	1.03057	1.23176	1.08502	0.830473	0.955982	1.03004	0.938831	1.15571	0.196085
Q7Z759	CCT8 protein OS=Homo sapiens GN=CCT8 PE=2 SV=1 - [Q7Z759_HUMAN]	4.43	2	2	2	497	54.0717	5.31299	0.927353	1.09346	1.31272	1.11118	0.535003	1.1195	0.993556	0.882686	1.25886	0.337235
A8K9D8	cDNA FLJ78129, highly similar to Homo sapiens reversion-inducing-cysteine-rich protein with kazal motifs (RECK), mRNA OS=Homo sapiens PE=2 SV=1 - [A8K9D8_HUMAN]	0.72	1	1	1	971	106.387	6.68311	1.15396	1.19988	1.03982	1.13122	1.0501	0.918832	0.997692	0.988873	1.14395	0.0799035
B4DJQ7	cDNA FLJ60602, moderately similar to D-dopachrome decarboxylase (EC 4.1.1.84) OS=Homo sapiens PE=2 SV=1 - [B4DJQ7_HUMAN]	13.39	2	2	3	112	11.6678	5.78271	1.02749	0.962068	1.16834	1.05263	0.821107	1.02321	0.979335	0.941217	1.11837	0.266874
B4DHM1	cDNA FLJ54508, highly similar to tRNA(5-methylaminomethyl-2-thiouridylate)-methyltransferase (EC 2.1.1.61) OS=Homo sapiens PE=2 SV=1 - [B4DHM1_HUMAN]	1.83	1	1	1	328	37.099	7.97217	0.89835	1.06569	0.93937	0.967805	1.36359	0.719798	0.847562	0.976983	0.990605	0.966126
C9IY94	Septin-2 (Fragment) OS=Homo sapiens GN=SEPT2 PE=1 SV=1 - [C9IY94_HUMAN]	9.92	1	1	1	121	13.728	5.80811	1.00583	1.07791	1.12872	1.07082	0.516	1.04672	0.821811	0.794842	1.34721	0.155364
A8K990	cDNA FLJ78482 OS=Homo sapiens PE=2 SV=1 - [A8K990_HUMAN]	1.16	1	1	1	774	84.0867	4.33545	1.1593	0.877867	0.9489	0.995356	0.811884	0.818604	0.783498	0.804662	1.23699	0.0887488
E9PN95	Uteroglobin OS=Homo sapiens GN=SCGB1A1 PE=1 SV=1 - [E9PN95_HUMAN]	12.5	1	1	1	56	6.28112	4.95752	1.17007	0.82273	0.794273	0.929024	1.59756	1.14111	1.2233	1.32066	0.703456	0.102047
D6RIU4	Vesicular integral-membrane protein VIP36 (Fragment) OS=Homo sapiens GN=LMAN2 PE=1 SV=8 - [D6RIU4_HUMAN]	6.28	1	1	1	191	21.8466	6.52197	1.24028	0.922971	0.965809	1.04302	1.17081	1.03134	1.1469	1.11635	0.934315	0.5356
Q86U17	Serpin A11 OS=Homo sapiens GN=SERPINA11 PE=2 SV=2 - [SPA11_HUMAN]	3.79	2	2	2	422	46.9595	7.6792	1.28703	0.94477	1.06874	1.10018	0.980659	0.884556	1.02718	0.964133	1.14111	0.278167
X6RFL8	Ras-related protein Rab-14 (Fragment) OS=Homo sapiens GN=RAB14 PE=1 SV=1 - [X6RFL8_HUMAN]	13.26	2	2	2	181	20.3963	6.32861	1.03631	1.03144	1.15047	1.07274	0.655957	1.03849	0.854967	0.849806	1.26233	0.129686
B7Z795	Carboxylic ester hydrolase OS=Homo sapiens PE=2 SV=1 - [B7Z795_HUMAN]	8.1	3	3	3	432	47.6793	5.94775	0.890596	1.12807	1.07813	1.03227	1.06754	1.09712	0.828525	0.997728	1.03462	0.772409
Q86WA0	Hypoxia-inducible HIG-1 (Fragment) OS=Homo sapiens GN=HIG-1 PE=2 SV=1 - [Q86WA0_HUMAN]	1.66	1	1	1	722	81.6964	7.51807	1.43412	0.828464	1.29557	1.18605	1.10647	1.17754	1.16869	1.1509	1.03054	0.858239
A0A125U0V1	MS-F1 heavy chain variable region (Fragment) OS=Homo sapiens PE=2 SV=1 - [A0A125U0V1_HUMAN]	7.94	1	1	1	126	13.5004	8.1626	0.619636	0.656434	0.333502	0.536524	1.15134	0.934284	1.81951	1.30171	0.412168	0.0550888
J3KQ45	Trans-Golgi network integral membrane protein 2 OS=Homo sapiens GN=TGOLN2 PE=1 SV=1 - [J3KQ45_HUMAN]	9.03	4	4	4	454	47.8517	5.84619	1.12766	0.891379	0.956482	0.99184	1.08192	0.960315	1.11158	1.05127	0.943469	0.51971
Q07960	Rho GTPase-activating protein 1 OS=Homo sapiens GN=ARHGAP1 PE=1 SV=1 - [RHG01_HUMAN]	12.98	4	4	5	439	50.4042	6.29053	1.08212	1.08776	0.955412	1.04176	0.693958	0.996483	0.818864	0.836435	1.24548	0.103791
B0BCY7	Aminopeptidase OS=Homo sapiens GN=ENPEP PE=2 SV=1 - [B0BCY7_HUMAN]	0.84	1	1	1	957	109.162	5.46533	1.03701	1.036	1.27533	1.11611	0.82117	0.954049	0.839308	0.871509	1.28067	0.052815
P14550	Alcohol dehydrogenase [NADP(+)] OS=Homo sapiens GN=AKR1A1 PE=1 SV=3 - [AK1A1_HUMAN]	2.46	1	1	1	325	36.5499	6.78564	1.00246	1.01298	1.17167	1.06237	0.684909	0.994675	0.999488	0.893024	1.18963	0.223228
C9JM82	Septin-5 (Fragment) OS=Homo sapiens GN=SEPT5 PE=1 SV=1 - [C9JM82_HUMAN]	3.99	1	1	1	301	34.6506	6.20166	0.941832	0.909875	1.24238	1.03136	0.797176	0.954465	0.985163	0.912268	1.13055	0.380222
B4DDT1	cDNA FLJ50111, highly similar to Hepatic triacylglycerol lipase (EC 3.1.1.3) OS=Homo sapiens PE=2 SV=1 - [B4DDT1_HUMAN]	1.6	1	1	1	438	48.9341	9.12939	0.990402	0.783185	0.935965	0.903184	1.53734	1.01785	1.07207	1.20909	0.746997	0.157467
D6RC06	Histidine triad nucleotide-binding protein 1 OS=Homo sapiens GN=HINT1 PE=1 SV=1 - [D6RC06_HUMAN]	10.77	1	1	1	65	7.31895	9.40771	0.80738	0.955018	1.229	0.997132	0.54908	1.23336	1.04334	0.941925	1.05861	0.828255
Q00610	Clathrin heavy chain 1 OS=Homo sapiens GN=CLTC PE=1 SV=5 - [CLH1_HUMAN]	2.39	3	4	5	1675	191.493	5.69385	1.04732	1.00361	0.91065	0.987191	0.745662	1.02118	1.26116	1.00934	0.97806	0.892811
Q5R341	Selectin P (Granule membrane protein 140kDa, antigen CD62), isoform CRA_a OS=Homo sapiens GN=SELP PE=1 SV=1 - [Q5R341_HUMAN]	2.21	2	2	2	768	83.9802	6.7124	0.778536	1.1154	1.01297	0.968967	0.703389	0.983685	1.20642	0.964499	1.00463	0.981007
A0A1E1ERW3	Diaphanous homolog 1 OS=Homo sapiens GN=DIAPH1 PE=2 SV=1 - [A0A1E1ERW3_HUMAN]	0.67	1	1	1	1203	133.796	5.2749	1.18013	1.09939	1.25241	1.17731	0.343884	1.15281	0.811427	0.769375	1.53021	0.162488
B7Z5C1	cDNA FLJ56126, highly similar to Programmed cell death 6-interacting protein OS=Homo sapiens PE=2 SV=1 - [B7Z5C1_HUMAN]	2	1	1	1	649	71.7747	6.41748	1.10165	1.20521	1.30314	1.20333	0.69963	1.05764	0.902734	0.886667	1.35715	0.0561526
Q5J1K4	Mono-ADP-ribosyltransferase 3 variant Id (Fragment) OS=Homo sapiens PE=2 SV=1 - [Q5J1K4_HUMAN]	25	2	2	2	84	9.55669	5.40186	1.03404	0.822058	1.08129	0.979128	1.03339	1.11517	1.00726	1.05194	0.930785	0.445288
A0A140TA77	Receptor-type tyrosine-protein phosphatase C (Fragment) OS=Homo sapiens GN=PTPRC PE=1 SV=1 - [A0A140TA77_HUMAN]	2.41	1	1	1	457	51.1488	6.59521	1.0211	1.0208	0.853653	0.965186	0.973301	0.888778	0.786512	0.882863	1.09325	0.348719
Q59H30	Activating transcription factor 6 variant (Fragment) OS=Homo sapiens PE=2 SV=1 - [Q59H30_HUMAN]	2.08	1	1	1	578	64.1779	8.48486	0.946735	1.21263	1.31105	1.1568	0.582326	1.32693	0.66303	0.85743	1.34915	0.313353
K7EJ25	N-acetylglucosamine-1-phosphodiester alpha-N-acetylglucosaminidase (Fragment) OS=Homo sapiens GN=NAGPA PE=1 SV=1 - [K7EJ25_HUMAN]	7.69	1	1	1	104	11.1156	8.88037	1.04144	1.0347	1.09019	1.05544	0.910081	1.02841	0.879989	0.939495	1.12342	0.0753391
Q99445	Glycosyl-phosphatidylinositol-anchored molecule-like protein OS=Homo sapiens GN=GML PE=2 SV=1 - [GML_HUMAN]	3.8	1	1	1	158	17.7178	6.48096	1.02424	0.947365	0.917696	0.9631	1.28221	0.85239	1.19075	1.10845	0.868871	0.340722
Q15149	Plectin OS=Homo sapiens GN=PLEC PE=1 SV=3 - [PLEC_HUMAN]	0.19	1	1	1	4684	531.466	5.96045	0.761573	0.765582	1.52734	1.01817	0.751967	1.21081	0.960459	0.974413	1.0449	0.88624
Q9H7K8	FLJ00064 protein (Fragment) OS=Homo sapiens GN=FLJ00064 PE=2 SV=1 - [Q9H7K8_HUMAN]	4.35	1	1	1	276	30.3631	5.65576	1.00485	0.984732	1.10286	1.03081	0.715742	0.974053	0.811124	0.83364	1.23652	0.0782114
Q5IWS5	Intelectin 1 OS=Homo sapiens GN=ITLN1 PE=2 SV=1 - [Q5IWS5_HUMAN]	2.56	1	1	1	313	34.9553	5.8208	1.20814	1.42466	0.897511	1.17677	0.86458	0.723651	0.773783	0.787338	1.49462	0.0698519
P01854	Immunoglobulin heavy constant epsilon OS=Homo sapiens GN=IGHE PE=1 SV=1 - [IGHE_HUMAN]	1.87	1	1	1	428	46.9893	8.06006	0.503526	0.65906	0.800656	0.654414	0.766647	0.623093	3.50509	1.63161	0.401084	0.357964
C9JRZ8	Aldo-keto reductase family 1 member B15 OS=Homo sapiens GN=AKR1B15 PE=1 SV=2 - [AK1BF_HUMAN]	2.53	1	1	1	316	36.5138	6.69775	0.983614	0.884954	1.2193	1.02929	0.742067	1.09408	1.15563	0.997257	1.03212	0.853421
Q5JSH3	WD repeat-containing protein 44 OS=Homo sapiens GN=WDR44 PE=1 SV=1 - [WDR44_HUMAN]	1.97	2	2	2	913	101.304	5.45264	1.00705	1.01225	1.31931	1.11287	0.537081	0.948754	1.00219	0.82934	1.34187	0.189509
B2RAH7	cDNA, FLJ94921, highly similar to Homo sapiens prolyl endopeptidase (PREP), mRNA OS=Homo sapiens PE=2 SV=1 - [B2RAH7_HUMAN]	1.13	1	1	1	710	80.682	5.85889	1.00616	0.897779	1.768	1.22398	0.51658	1.0308	0.779973	0.775786	1.57773	0.22355
A0A140T998	Proteasome subunit beta type-8 OS=Homo sapiens GN=PSMB8 PE=1 SV=1 - [A0A140T998_HUMAN]	3.17	1	1	1	252	27.8323	7.79639	0.980152	1.05487	0.957715	0.99758	0.848463	1.01221	1.21353	1.02474	0.9735	0.816485
B4DZM1	cDNA FLJ58310, highly similar to Homo sapiens trinucleotide repeat containing 15 (TNRC15), mRNA OS=Homo sapiens PE=2 SV=1 - [B4DZM1_HUMAN]	1.72	1	1	5	872	100.549	5.021	1.10447	1.03254	0.962325	1.03311	1.09728	0.988187	0.917052	1.00084	1.03225	0.653136
P22692	Insulin-like growth factor-binding protein 4 OS=Homo sapiens GN=IGFBP4 PE=1 SV=2 - [IBP4_HUMAN]	18.22	4	4	8	258	27.9155	7.15186	1.12104	1.02753	0.975927	1.0415	1.01254	0.984011	0.966593	0.987715	1.05445	0.293662
Q99592	Zinc finger and BTB domain-containing protein 18 OS=Homo sapiens GN=ZBTB18 PE=1 SV=1 - [ZBT18_HUMAN]	2.3	1	1	2	522	58.3173	5.69385	0.99783	1.2134	0.70948	0.97357	1.3854	0.754645	0.852072	0.997371	0.976136	0.92711
Q9NY41	Cartilage glycoprotein-39 (Fragment) OS=Homo sapiens GN=CHI3L1 PE=4 SV=1 - [Q9NY41_HUMAN]	17.39	1	1	1	46	5.08455	4.729	1.03067	1.2127	0.524433	0.9226	1.15576	1.04888	1.20704	1.13723	0.811272	0.3668
G3V5F2	Peptidyl-prolyl cis-trans isomerase FKBP3 OS=Homo sapiens GN=FKBP3 PE=1 SV=1 - [G3V5F2_HUMAN]	12.31	1	1	1	65	7.22069	8.57275	1.04079	1.02557	1.4281	1.16482	0.720621	1.06023	0.827709	0.869519	1.33962	0.148972
H0YC77	Annexin (Fragment) OS=Homo sapiens GN=ANXA6 PE=1 SV=1 - [H0YC77_HUMAN]	9.89	1	1	1	91	10.1281	7.21045	0.93293	0.76926	1.24016	0.980785	0.675293	0.952166	0.927172	0.851544	1.15177	0.474541
A0A0G2JRQ8	MLX-interacting protein (Fragment) OS=Homo sapiens GN=MLXIP PE=4 SV=4 - [A0A0G2JRQ8_HUMAN]	8.22	1	1	1	73	8.29098	4.76709	1.11583	0.9807	1.08604	1.06086	1.15184	1.20075	0.898944	1.08384	0.978792	0.832924
Q59H95	Flightless I homolog variant (Fragment) OS=Homo sapiens PE=2 SV=1 - [Q59H95_HUMAN]	1.09	1	1	1	1101	125.198	5.26221	0.841419	0.768214	1.41183	1.00715	0.183527	1.17254	1.13892	0.831663	1.21101	0.670402
P59665	Neutrophil defensin 1 OS=Homo sapiens GN=DEFA1 PE=1 SV=1 - [DEF1_HUMAN]	19.15	2	2	5	94	10.1942	6.99072	0.844976	0.867806	0.966735	0.893172	0.822989	1.01068	1.32426	1.05264	0.848504	0.350249
B4DKZ9	cDNA FLJ55705, highly similar to Threonyl-tRNA synthetase, cytoplasmic (EC 6.1.1.3) OS=Homo sapiens PE=2 SV=1 - [B4DKZ9_HUMAN]	1	1	1	1	602	70.3158	8.55811	0.945818	1.09943	1.41815	1.15447	0.502449	1.32328	0.685648	0.837127	1.37908	0.327923
Q8TDY8	Immunoglobulin superfamily DCC subclass member 4 OS=Homo sapiens GN=IGDCC4 PE=1 SV=1 - [IGDC4_HUMAN]	0.8	1	1	1	1250	134.126	6.20166	1.05824	1.07045	1.06102	1.06324	1.05613	0.964505	0.920596	0.980409	1.08448	0.107743
B5MDP7	Papilin OS=Homo sapiens GN=PAPLN PE=1 SV=2 - [B5MDP7_HUMAN]	1.24	1	1	1	808	87.2188	7.29834	1.34305	1.01843	1.01521	1.12556	1.04518	0.966221	0.971592	0.994331	1.13198	0.305178
B4DJ06	cDNA FLJ56620 OS=Homo sapiens PE=2 SV=1 - [B4DJ06_HUMAN]	1.11	1	1	1	629	67.9044	4.90674	1.19673	1.07658	0.688152	0.987153	1.3535	0.697444	0.765036	0.938661	1.05166	0.860468
O43150	Arf-GAP with SH3 domain, ANK repeat and PH domain-containing protein 2 OS=Homo sapiens GN=ASAP2 PE=1 SV=3 - [ASAP2_HUMAN]	1.39	1	1	1	1006	111.581	6.68311	1.04657	0.987123	1.12475	1.05282	0.555367	1.21119	0.743947	0.836835	1.25809	0.338734
P05771	Protein kinase C beta type OS=Homo sapiens GN=PRKCB PE=1 SV=4 - [KPCB_HUMAN]	2.68	2	2	2	671	76.8191	7.00537	0.988376	1.16828	1.16865	1.10844	0.785475	0.972942	1.04819	0.935535	1.18482	0.154095
D6RHH7	Corticotropin-releasing factor-binding protein OS=Homo sapiens GN=CRHBP PE=1 SV=1 - [D6RHH7_HUMAN]	3.78	1	1	1	238	27.0648	7.15186	1.17681	1.01658	1.16719	1.12019	0.874268	1.14152	1.01724	1.01101	1.108	0.305623
Q2TBE1	REG1A protein (Fragment) OS=Homo sapiens GN=REG1A PE=2 SV=2 - [Q2TBE1_HUMAN]	11.63	1	1	1	86	9.66934	4.14502	0.948787	1.05232	0.73338	0.911495	1.31789	1.42857	0.93366	1.22671	0.743042	0.149462
P49588	Alanine--tRNA ligase, cytoplasmic OS=Homo sapiens GN=AARS PE=1 SV=2 - [SYAC_HUMAN]	1.65	1	1	1	968	106.743	5.52881	0.95693	1.02415	0.937325	0.972801	0.982152	0.957844	0.897441	0.945812	1.02853	0.499643
E9PQ14	Dipeptidyl peptidase 3 (Fragment) OS=Homo sapiens GN=DPP3 PE=1 SV=1 - [E9PQ14_HUMAN]	3.95	1	1	1	177	19.8069	5.94775	0.889199	1.03578	1.33413	1.08637	0.609795	0.938444	0.941636	0.829958	1.30895	0.208219
D6R9K1	Claudin domain-containing protein 1 OS=Homo sapiens GN=CLDND1 PE=1 SV=1 - [D6R9K1_HUMAN]	10.34	1	1	1	87	9.68882	5.74463	1.21021	0.906756	1.28866	1.13521	0.579333	1.30659	0.69293	0.859619	1.32059	0.339163
Q6UVK1	Chondroitin sulfate proteoglycan 4 OS=Homo sapiens GN=CSPG4 PE=1 SV=2 - [CSPG4_HUMAN]	0.6	1	1	1	2322	250.382	5.46533	1.07898	0.83679	1.03369	0.983156	1.12517	0.990835	0.843486	0.986497	0.996613	0.977266
O15256	Parathymosin (Fragment) OS=Homo sapiens GN=PTMS PE=4 SV=1 - [O15256_HUMAN]	17.46	1	1	1	63	7.44688	9.5249	1.15214	1.23551	1.17273	1.18679	0.390125	1.33251	0.654249	0.792294	1.49792	0.234094
A0A0A7M1X5	Lamin B2, isoform CRA_b OS=Homo sapiens GN=LMNB2 PE=2 SV=1 - [A0A0A7M1X5_HUMAN]	2.48	1	1	1	483	53.5251	7.12256	1.29039	0.967653	1.50925	1.25577	1.0222	0.918567	1.13001	1.02359	1.22682	0.240837
Q04760	Lactoylglutathione lyase OS=Homo sapiens GN=GLO1 PE=1 SV=4 - [LGUL_HUMAN]	8.15	2	2	2	184	20.7642	5.31299	0.918006	1.08403	1.11746	1.03983	0.794377	1.02517	1.05261	0.957387	1.08611	0.466359
Q6UWP8	Suprabasin OS=Homo sapiens GN=SBSN PE=1 SV=2 - [SBSN_HUMAN]	2.37	1	1	1	590	60.5046	7.00537	0.985763	1.30454	1.01958	1.10329	1.09212	0.832243	1.00288	0.975748	1.13072	0.370758
Q15365	Poly(rC)-binding protein 1 OS=Homo sapiens GN=PCBP1 PE=1 SV=2 - [PCBP1_HUMAN]	6.18	2	2	2	356	37.4739	7.09326	1.065	1.23795	0.930647	1.07787	0.761259	1.0345	1.0006	0.932121	1.15636	0.304062
A6PVN7	Serine/threonine-protein phosphatase 2A activator (Fragment) OS=Homo sapiens GN=PTPA PE=1 SV=1 - [A6PVN7_HUMAN]	20.31	1	1	1	64	7.39591	8.47021	0.973699	1.05028	1.39562	1.13987	0.530556	1.14881	0.926881	0.868749	1.31208	0.290121
A0A068LKQ2	Ig heavy chain variable region (Fragment) OS=Homo sapiens PE=2 SV=1 - [A0A068LKQ2_HUMAN]	18.33	1	2	3	120	13.1496	9.0708	1.07695	0.605587	0.754027	0.812188	0.944169	0.975771	1.33313	1.08436	0.749004	0.218961
H7BZ09	Acidic leucine-rich nuclear phosphoprotein 32 family member A OS=Homo sapiens GN=ANP32A PE=1 SV=1 - [H7BZ09_HUMAN]	10.13	1	1	1	79	9.18189	9.18799	1.03993	0.880979	1.15056	1.02382	0.771668	1.1119	0.846872	0.910148	1.1249	0.429591
Q9NZN3	EH domain-containing protein 3 OS=Homo sapiens GN=EHD3 PE=1 SV=2 - [EHD3_HUMAN]	4.86	1	3	3	535	60.8487	6.56592	0.948566	1.03454	1.38342	1.12217	0.743182	1.03671	0.971661	0.917185	1.2235	0.269361
Q8WWQ8	Stabilin-2 OS=Homo sapiens GN=STAB2 PE=1 SV=3 - [STAB2_HUMAN]	0.55	1	1	1	2551	276.805	6.40479	0.683205	2.57383	0.52969	1.26224	0.924036	0.678356	0.81367	0.805354	1.56731	0.527527
A9UFC0	Caspase 14 OS=Homo sapiens GN=CASP14 PE=2 SV=1 - [A9UFC0_HUMAN]	5.37	1	1	2	242	27.6489	5.33838	1.02942	1.08497	0.799747	0.971378	1.00332	1.0493	1.04716	1.03326	0.94011	0.523279
Q7Z4C7	MSTP128 OS=Homo sapiens PE=2 SV=1 - [Q7Z4C7_HUMAN]	2.69	1	1	1	297	35.6381	5.41455	0.95021	0.873288	1.31148	1.04499	0.701016	1.02354	1.09188	0.93881	1.1131	0.589016
Q9H3P7	Golgi resident protein GCP60 OS=Homo sapiens GN=ACBD3 PE=1 SV=4 - [GCP60_HUMAN]	1.14	1	1	1	528	60.556	5.05908	1.14504	1.01008	1.13821	1.09778	1.29742	0.879306	1.13898	1.10524	0.993251	0.956844
B4DN39	cDNA FLJ53065, highly similar to T-complex protein 1 subunit zeta OS=Homo sapiens PE=2 SV=1 - [B4DN39_HUMAN]	5.4	1	1	1	389	42.8875	6.62451	0.837784	1.08893	0.670245	0.865653	0.85364	1.13881	0.967681	0.986709	0.877314	0.45707
A5D8Z4	WNK1 protein (Fragment) OS=Homo sapiens GN=WNK1 PE=2 SV=1 - [A5D8Z4_HUMAN]	0.72	1	1	2	1537	159.423	6.52197	1.09196	0.798706	1.26356	1.05141	1.07799	1.10311	0.925268	1.03546	1.0154	0.918631
F8VXL2	Dynein light chain 1, cytoplasmic OS=Homo sapiens GN=DYNLL1 PE=1 SV=1 - [F8VXL2_HUMAN]	14.89	1	1	1	47	5.42265	5.33838	0.901274	0.917941	1.49699	1.1054	0.622357	1.06401	1.02674	0.90437	1.22229	0.452105
D3DXE4	KIAA0773 gene product, isoform CRA_b OS=Homo sapiens GN=KIAA0773 PE=4 SV=1 - [D3DXE4_HUMAN]	8.67	1	1	1	300	32.2158	4.42432	1.18279	0.839465		1.01113	1.06333	1.20947	1.52881	1.26721	0.797918	0.326275
Q59FI2	Protein tyrosine phosphatase, receptor type, F isoform 2 variant (Fragment) OS=Homo sapiens PE=2 SV=1 - [Q59FI2_HUMAN]	2.45	3	3	3	1552	174.769	6.63916	1.18285	1.0671	1.0942	1.11472	1.11351	1.04355	0.903332	1.02013	1.09272	0.253591
T2HK55	NADH-ubiquinone oxidoreductase chain 1 OS=Homo sapiens GN=ndh1 PE=3 SV=1 - [T2HK55_HUMAN]	8.81	1	1	2	318	35.64	5.93506	1.29212	0.836648	0.944729	1.0245	1.06299	1.14986	0.46489	0.892579	1.1478	0.632753
A0A059QQL5	NADH-ubiquinone oxidoreductase chain 1 OS=Homo sapiens GN=ND1 PE=3 SV=1 - [A0A059QQL5_HUMAN]	3.14	1	1	2	318	35.551	5.93506	0.30408	0.254596	0.234995	0.264557	0.901207	0.947934	4.05624	1.96846	0.134398	0.178055
O00602	Ficolin-1 OS=Homo sapiens GN=FCN1 PE=1 SV=2 - [FCN1_HUMAN]	4.91	2	2	2	326	35.0561	6.85889	0.973946	0.978535	1.06093	1.00447	0.898324	0.950301	1.03324	0.960621	1.04565	0.416158
J3QS68	E3 ubiquitin-protein ligase RNF135 (Fragment) OS=Homo sapiens GN=RNF135 PE=1 SV=8 - [J3QS68_HUMAN]	6.33	1	1	1	158	17.4286	7.92822	0.906854	0.842667	1.0455	0.931672	1.19911	1.02559	1.18822	1.13764	0.818952	0.0660194
B3KXG0	cDNA FLJ45349 fis, clone BRHIP3011460, highly similar to Homo sapiens Src homology 3 domain-containing guanine nucleotide exchange factor (SGEF), mRNA OS=Homo sapiens PE=2 SV=1 - [B3KXG0_HUMAN]	1.26	1	1	1	871	97.192	8.95361	1.04756	0.936438	1.12458	1.03619	1.06991	0.979355	1.00291	1.01739	1.01848	0.773187
F5GWB1	Coiled-coil domain-containing protein 91 OS=Homo sapiens GN=CCDC91 PE=1 SV=1 - [F5GWB1_HUMAN]	2.25	1	1	1	267	29.3277	4.83057	1.14213	1.15811	0.867309	1.05585	1.19687	0.959761	0.954026	1.03689	1.01829	0.885617
Q96NM1	HCG1990367 OS=Homo sapiens GN=FLJ30594 PE=2 SV=1 - [Q96NM1_HUMAN]	3.77	1	1	1	159	17.3529	9.64209	0.890873	0.931885	0.992029	0.938262	1.24983	1.02989	0.970271	1.08333	0.86609	0.182065
K7EIU0	Hsp90 co-chaperone Cdc37 (Fragment) OS=Homo sapiens GN=CDC37 PE=1 SV=1 - [K7EIU0_HUMAN]	6.73	1	1	1	104	11.6478	5.0083	1.05909	1.06114	1.2722	1.13081	0.422059	1.02932	1.07808	0.843154	1.34117	0.265771
Q8WU23	POLE protein OS=Homo sapiens PE=2 SV=1 - [Q8WU23_HUMAN]	3.78	1	1	2	370	41.4852	4.80518	1.27604	0.979456	1.42461	1.2267	0.824683	1.06647	0.952559	0.947904	1.29412	0.133329
B4E006	cDNA FLJ53119, highly similar to ADP-ribosyl cyclase 1 (EC 3.2.2.5) OS=Homo sapiens PE=2 SV=1 - [B4E006_HUMAN]	11.25	1	1	1	160	17.9172	8.96826	0.718171	0.572195	0.560411	0.616926	0.607073	1.41187	2.0514	1.35678	0.454698	0.153626
A0A0A0N0L2	IL6ST isoform 4 OS=Homo sapiens GN=IL6ST PE=2 SV=1 - [A0A0A0N0L2_HUMAN]	4.55	4	4	5	857	96.2157	5.89697	0.979239	1.02891	1.00447	1.00421	0.985432	1.10149	1.01749	1.03481	0.970433	0.459893
B4DIR5	cDNA FLJ56026 OS=Homo sapiens PE=2 SV=1 - [B4DIR5_HUMAN]	0.61	1	1	2	1147	127.054	6.7124	1.08797	1.17222	1.02806	1.09608	1.12964	0.879851	1.01907	1.00952	1.08575	0.358373
H7C557	Multiple epidermal growth factor-like domains protein 6 OS=Homo sapiens GN=MEGF6 PE=1 SV=2 - [H7C557_HUMAN]	1.89	1	1	1	1323	138.306	6.62451	1.17377	1.09901	0.89093	1.05457	1.10082	0.926774	1.13328	1.05363	1.0009	0.993318
A8K4W5	cDNA FLJ76813, highly similar to Homo sapiens acetyl-Coenzyme A acetyltransferase 2 (acetoacetyl Coenzyme A thiolase), mRNA OS=Homo sapiens PE=2 SV=1 - [A8K4W5_HUMAN]	2.77	1	1	1	397	41.3524	6.91748	0.891672	1.1176	0.825907	0.94506	0.959748	1.19288	0.857782	1.00347	0.941791	0.682797
Q6ZRP2	cDNA FLJ46208 fis, clone TESTI4010979 OS=Homo sapiens PE=2 SV=1 - [Q6ZRP2_HUMAN]	4.32	1	1	1	139	15.3612	9.02686	0.924903	0.969511	1.37871	1.09104	0.572592	1.08434	1.11739	0.924774	1.17979	0.506141
Q1LZN2	NOMO3 protein (Fragment) OS=Homo sapiens GN=NOMO3 PE=2 SV=1 - [Q1LZN2_HUMAN]	0.87	1	1	1	807	89.7607	5.66846	1.0989	0.9451	0.994216	1.01274	1.21666	1.03054	1.00213	1.08311	0.935029	0.4347
B4E2Q7	cDNA FLJ51461, highly similar to Cohesin subunit SA-1 OS=Homo sapiens PE=2 SV=1 - [B4E2Q7_HUMAN]	0.83	1	1	1	842	96.5796	5.2749	0.963991	0.932953	1.02644	0.974463	1.12773	0.954756	0.943388	1.00862	0.966131	0.630407
A0A0B4J1R4	4-hydroxyphenylpyruvate dioxygenase OS=Homo sapiens GN=HPD PE=1 SV=1 - [A0A0B4J1R4_HUMAN]	2.04	1	1	1	393	44.9359	7.00537	0.817835	0.851501	0.868719	0.846018	1.07495	1.09394	0.846988	1.00529	0.841562	0.119791
A9UK01	Rho GTPase activating protein OS=Homo sapiens PE=2 SV=1 - [A9UK01_HUMAN]	1.96	1	1	1	663	74.9309	6.17627	0.875759	1.30481	1.10878	1.09645	0.510628	0.980094	1.00372	0.831481	1.31867	0.261587
Q3LIE3	Uncharacterized protein Nbla04137 (Fragment) OS=Homo sapiens GN=Nbla04137 PE=2 SV=1 - [Q3LIE3_HUMAN]	3.11	1	1	1	289	33.326	5.21143	1.26183	1.01628	1.07359	1.11724	1.11076	0.871532	0.981853	0.988047	1.13075	0.271587
B4DQW7	cDNA FLJ54378, highly similar to Golgin subfamily B member 1 (Fragment) OS=Homo sapiens PE=2 SV=1 - [B4DQW7_HUMAN]	0.9	1	1	2	889	101.865	4.7417	1.15273	1.00182	1.05991	1.07149	0.896325	1.1644	1.0916	1.05077	1.01971	0.831657
B4DUR8	T-complex protein 1 subunit gamma OS=Homo sapiens GN=CCT3 PE=1 SV=1 - [B4DUR8_HUMAN]	1.6	1	1	1	500	55.6387	5.64307	1.00761	1.0336	1.39065	1.14395	0.67401	1.11738	0.847624	0.879672	1.30043	0.213111
U3KQT1	S-formylglutathione hydrolase (Fragment) OS=Homo sapiens GN=ESD PE=1 SV=1 - [U3KQT1_HUMAN]	5.83	1	1	1	120	13.1007	8.68994	0.829983	1.392	1.19946	1.14048	0.48409	0.837268	0.818275	0.713211	1.59908	0.100526
H0YA14	cGMP-specific 3',5'-cyclic phosphodiesterase (Fragment) OS=Homo sapiens GN=PDE5A PE=1 SV=1 - [H0YA14_HUMAN]	8.11	1	1	1	185	21.537	6.32861	1.09266	1.03315	1.23984	1.12188	0.774522	1.17182	0.848083	0.931474	1.20442	0.23585
B4DT06	Xylosyltransferase 2 OS=Homo sapiens GN=XYLT2 PE=1 SV=1 - [B4DT06_HUMAN]	2.07	1	1	1	676	75.4655	9.02686	1.15735	0.987374	0.916318	1.02035	1.17219	1.0257	1.1964	1.13143	0.901823	0.280995
B7Z6W6	cDNA FLJ52268, highly similar to Intercellular adhesion molecule 3 OS=Homo sapiens PE=2 SV=1 - [B7Z6W6_HUMAN]	6.62	1	1	1	151	16.8274	7.06396	1.02049	0.870789	1.0136	0.968292	1.01932	1.0194	1.13062	1.05645	0.916556	0.223717
B3KXB6	cDNA FLJ45101 fis, clone BRAWH3032298, highly similar to Tenascin-N OS=Homo sapiens PE=2 SV=1 - [B3KXB6_HUMAN]	1.85	1	1	1	1299	143.815	5.63037	0.641318	1.30817	0.601026	0.850172	0.892914	1.31339	1.25969	1.15533	0.735867	0.313072
O95755	Ras-related protein Rab-36 OS=Homo sapiens GN=RAB36 PE=2 SV=2 - [RAB36_HUMAN]	3.3	1	1	1	333	36.2994	7.85498	1.14435	0.871439	1.07839	1.03139	1.06179	1.05153	1.12143	1.07825	0.956546	0.611032
B3KPC9	cDNA FLJ31622 fis, clone NT2RI2003220, highly similar to Zinc finger protein 337 OS=Homo sapiens PE=2 SV=1 - [B3KPC9_HUMAN]	1.77	1	1	1	622	71.9646	9.70068	0.789323	1.47258	0.831777	1.03123	0.966505	0.934698	1.05035	0.983852	1.04815	0.842627
H0YIJ6	Phosphatidylinositol 5-phosphate 4-kinase type-2 gamma (Fragment) OS=Homo sapiens GN=PIP4K2C PE=1 SV=8 - [H0YIJ6_HUMAN]	5.97	1	1	2	134	15.5359	5.10986	0.982591	1.17119	0.969756	1.04118	1.02541	0.97737	1.07302	1.02527	1.01552	0.833011
X5D7P8	Serine threonine kinase 39 isoform D (Fragment) OS=Homo sapiens GN=STK39 PE=2 SV=1 - [X5D7P8_HUMAN]	3.58	1	1	1	475	52.2329	6.25244	0.701342	1.05497	1.08704	0.947786	1.22998	0.944715	0.846015	1.0069	0.941289	0.743961
Q6PID9	Aggrecan OS=Homo sapiens GN=ACAN PE=1 SV=1 - [Q6PID9_HUMAN]	1.94	1	1	1	721	79.565	5.05908	0.999925	1.17167	0.950131	1.04057	0.907252	0.970335	1.04235	0.973314	1.0691	0.435132
Q9H2L9	AD034 OS=Homo sapiens PE=2 SV=1 - [Q9H2L9_HUMAN]	1.83	1	1	1	327	38.0191	7.13721	0.443483	2.00566	0.122681	0.857276	0.605142	1.55518	0.749755	0.970027	0.883764	0.87118
I6L957	HNRNPA2B1 protein OS=Homo sapiens GN=HNRNPA2B1 PE=2 SV=1 - [I6L957_HUMAN]	4.02	1	1	1	249	28.3941	4.85596	1.14868	0.945555	1.66125	1.25183	0.343789	1.02096	0.939916	0.768221	1.62951	0.18403
A1L159	IKBKB protein (Fragment) OS=Homo sapiens GN=IKBKB PE=2 SV=1 - [A1L159_HUMAN]	8.33	1	1	1	132	14.8573	4.83057	1.21864	1.34565	0.526342	1.03021	1.00779	1.14304	0.856831	1.00255	1.02759	0.922677
Q9Y657	Spindlin-1 OS=Homo sapiens GN=SPIN1 PE=1 SV=3 - [SPIN1_HUMAN]	5.34	1	1	1	262	29.5818	6.96143	1.10224	0.975874	1.07293	1.05035	1.24914	0.837073	0.996436	1.02755	1.02219	0.865108
B4E1R1	cDNA FLJ52389, highly similar to Alcohol dehydrogenase 1B (EC 1.1.1.1) OS=Homo sapiens PE=2 SV=1 - [B4E1R1_HUMAN]	4.82	1	1	1	166	17.9103	8.06006	0.951897	0.892951	0.832708	0.892519	1.04149	1.3786	0.881346	1.10048	0.811028	0.239272
C9JXF9	Insulin-like growth factor-binding protein 1 OS=Homo sapiens GN=IGFBP1 PE=1 SV=1 - [C9JXF9_HUMAN]	2.72	1	1	1	257	27.6533	5.2876	1.5101	0.568063	0.928142	1.0021	1.11831	1.1134	1.08644	1.10605	0.906018	0.724283
Q9P172	PRO2281 OS=Homo sapiens PE=2 SV=1 - [Q9P172_HUMAN]	5.17	1	1	1	329	37.2228	5.21143	1.02456	0.99694	0.871201	0.964234	1.1136	0.833884	1.04379	0.997094	0.967045	0.750356
A2VCK2	Doublecortin domain-containing protein 2B OS=Homo sapiens GN=DCDC2B PE=1 SV=1 - [DCD2B_HUMAN]	3.72	1	1	1	349	37.6414	8.79248	0.83208	1.16589	1.19039	1.06279	0.918246	0.773697	0.776717	0.822887	1.29154	0.127439
F5H726	T-complex protein 1 subunit alpha (Fragment) OS=Homo sapiens GN=TCP1 PE=1 SV=1 - [F5H726_HUMAN]	10.99	1	1	1	91	9.5131	4.70361	0.936373	0.888345	1.02843	0.95105	0.90922	0.913413	0.865715	0.896116	1.0613	0.278416
G3V357	Ribonuclease pancreatic OS=Homo sapiens GN=RNASE1 PE=1 SV=1 - [G3V357_HUMAN]	6.03	1	1	1	116	13.0409	7.91357	1.07822	0.719101	0.774719	0.857347	1.50593	1.00881	1.211	1.24191	0.690344	0.102742
Q16393	LFA-3 (Fragment) OS=Homo sapiens PE=2 SV=1 - [Q16393_HUMAN]	8.4	1	1	1	119	13.723	7.37158	1.22288	1.0715	0.938246	1.07754	1.06407	0.93146	0.962821	0.986118	1.09271	0.373989
H0YLI4	LRP chaperone MESD OS=Homo sapiens GN=MESD PE=1 SV=1 - [H0YLI4_HUMAN]	11.25	1	1	1	80	8.69543	7.07861	1.10864	1.07939	1.39531	1.19445	0.640559	0.980227	1.04279	0.887859	1.34531	0.128787
K7EQ37	Protein unc-13 homolog D (Fragment) OS=Homo sapiens GN=UNC13D PE=1 SV=1 - [K7EQ37_HUMAN]	4.12	1	1	1	267	30.6616	6.16357	0.987893	0.980509	1.13153	1.03331	0.832015	1.01925	1.10705	0.986105	1.04787	0.644783
A9JR48	SALL3 protein OS=Homo sapiens GN=SALL3 PE=1 SV=1 - [A9JR48_HUMAN]	1.67	1	1	1	959	101.47	7.31299	1.37708	1.0928	1.03192	1.16726	1.12938	1.07994	0.924478	1.0446	1.11743	0.375011
A2N0S5	VH6DJ protein (Fragment) OS=Homo sapiens GN=VH6DJ PE=2 SV=1 - [A2N0S5_HUMAN]	14.91	1	2	11	114	12.5221	8.88037	0.82653	1.09744	0.562843	0.828937	0.987701	1.02848	1.02994	1.01537	0.816386	0.295236
A0A087X2B3	Neuronal cell adhesion molecule OS=Homo sapiens GN=NRCAM PE=1 SV=1 - [A0A087X2B3_HUMAN]	1.43	1	1	1	771	85.2943	5.52881	1.09128	0.962444	1.28054	1.11142	0.887824	0.867571	0.945146	0.90018	1.23466	0.0908477
H0Y984	ADP-ribosyl cyclase/cyclic ADP-ribose hydrolase 2 (Fragment) OS=Homo sapiens GN=BST1 PE=1 SV=1 - [H0Y984_HUMAN]	8.6	2	2	2	186	21.068	5.57959	0.69533	0.818086	0.64172	0.718379	0.786054	0.627676	0.619074	0.677601	1.06018	0.616939
Q9UBQ7	Glyoxylate reductase/hydroxypyruvate reductase OS=Homo sapiens GN=GRHPR PE=1 SV=1 - [GRHPR_HUMAN]	5.49	1	1	1	328	35.6457	7.38623	1.0777	0.828239	0.997304	0.967747	0.951821	1.17469	1.23614	1.12088	0.86338	0.248308
Q9NY43	BarH-like 2 homeobox protein OS=Homo sapiens GN=BARHL2 PE=1 SV=2 - [BARH2_HUMAN]	3.36	1	1	1	387	41.9549	8.54346	1.19441	1.00385	0.831378	1.00988	1.15705	0.909386	1.00958	1.02534	0.984921	0.909079
M0QZP7	Distal membrane-arm assembly complex protein 2 (Fragment) OS=Homo sapiens GN=DMAC2 PE=1 SV=1 - [M0QZP7_HUMAN]	7.33	1	1	2	150	16.9353	5.04639	0.929103	1.13885	0.790579	0.952845	1.08476	0.994158	1.04138	1.0401	0.916109	0.450948
Q53SQ6	Uncharacterized protein PTD004 (Fragment) OS=Homo sapiens GN=PTD004 PE=4 SV=1 - [Q53SQ6_HUMAN]	6.57	1	1	1	213	24.788	9.18799	0.962466	1.08911	1.35592	1.13583	0.651961	1.0748	1.001	0.909256	1.24919	0.263944
B3KUR3	cDNA FLJ40459 fis, clone TESTI2041800, highly similar to BISPHOSPHOGLYCERATE MUTASE (EC 5.4.2.4) OS=Homo sapiens PE=2 SV=1 - [B3KUR3_HUMAN]	11.16	2	2	2	242	27.9744	5.84619	0.718432	1.17493	0.560857	0.818072	1.18342	0.914735	1.24051	1.11289	0.735088	0.232558
H9E7F6	Cytochrome c oxidase subunit 1 OS=Homo sapiens GN=COX1 PE=3 SV=1 - [H9E7F6_HUMAN]	7.21	1	1	1	513	57.014	6.69775	1.3649	1.61881	0.770532	1.25142	0.978893	0.879616	1.20042	1.01964	1.22731	0.436949
B3KSD3	cDNA FLJ36024 fis, clone TESTI2016667, highly similar to Homo sapiens zinc finger CCCH-type containing 12A (ZC3H12A), mRNA OS=Homo sapiens PE=2 SV=1 - [B3KSD3_HUMAN]	1.52	1	1	1	394	41.7097	8.14795	1.03691	1.01828	1.366	1.1404	0.808285	0.94415	0.950111	0.900849	1.26591	0.121195
E9PM35	Beta-arrestin-1 (Fragment) OS=Homo sapiens GN=ARRB1 PE=1 SV=8 - [E9PM35_HUMAN]	19.46	3	3	4	257	29.1501	7.40088	0.961385	1.00224	1.14893	1.03752	0.677266	0.983899	1.01191	0.891025	1.16441	0.293928
K7ESI1	DNA repair protein RAD51 homolog 4 (Fragment) OS=Homo sapiens GN=RAD51D PE=4 SV=1 - [K7ESI1_HUMAN]	24.42	1	1	1	86	9.13257	7.07861	0.756704	1.27036	0.555274	0.860781	0.907733	0.950255	0.669071	0.842353	1.02188	0.940034
H0Y9C7	N(4)-(beta-N-acetylglucosaminyl)-L-asparaginase (Fragment) OS=Homo sapiens GN=AGA PE=1 SV=8 - [H0Y9C7_HUMAN]	14.94	2	2	2	154	16.9473	6.26514	0.89685	1.26658	0.733315	0.965583	0.986839	0.922074	1.11288	1.00727	0.958618	0.815607
B7Z570	cDNA FLJ53078, highly similar to Splicing factor, arginine/serine-rich 1 OS=Homo sapiens PE=2 SV=1 - [B7Z570_HUMAN]	11.19	1	1	2	143	16.2101	11.0923	0.924417	1.03388	0.749523	0.902608	1.05091	1.20486	1.45972	1.2385	0.728794	0.0816583
C5IJI6	Glutamate receptor 1 variant (Fragment) OS=Homo sapiens GN=GRIA1 PE=2 SV=1 - [C5IJI6_HUMAN]	27.12	1	1	1	59	6.62046	9.92041	1.13315	1.32676	0.732173	1.06403	1.2448	0.86822	1.10063	1.07122	0.993289	0.97391
Q8NF80	FLJ00275 protein (Fragment) OS=Homo sapiens GN=FLJ00275 PE=2 SV=1 - [Q8NF80_HUMAN]	6.02	2	2	2	382	41.0253	6.04932	1.03651	0.975404	0.932172	0.981362	1.03132	0.934601	0.933662	0.966528	1.01535	0.754738
B8ZWD8	Diazepam binding inhibitor, splice form 1D(1) OS=Homo sapiens GN=DBI PE=2 SV=1 - [B8ZWD8_HUMAN]	12.7	1	1	1	63	7.2677	8.93896	1.07879	1.04517	1.00076	1.04158	0.791583	1.00697	1.1389	0.979152	1.06375	0.5797
Q3ZCT3	SPON1 protein (Fragment) OS=Homo sapiens GN=SPON1 PE=2 SV=1 - [Q3ZCT3_HUMAN]	6.61	1	1	1	257	29.5897	7.94287	1.21515	1.02344	0.902425	1.04701	1.09058	1.00409	1.0419	1.04553	1.00141	0.988248
Q9UH97	Hematopoietic progenitor cell antigen CD34 (Fragment) OS=Homo sapiens GN=CD34 PE=2 SV=1 - [Q9UH97_HUMAN]	4.15	1	1	1	193	20.6966	7.15186	1.33152	0.979274	0.947839	1.08621	1.03798	0.891899	0.936373	0.955417	1.1369	0.372498
H3BPC3	Structure-specific endonuclease subunit SLX1 OS=Homo sapiens GN=SLX1A PE=4 SV=1 - [H3BPC3_HUMAN]	13.58	1	1	1	81	8.92773	11.7808	0.960777	0.70476	0.173306	0.612948	1.1866	0.920652	1.67252	1.25992	0.486495	0.113057
D6R9W4	Drebrin (Fragment) OS=Homo sapiens GN=DBN1 PE=1 SV=1 - [D6R9W4_HUMAN]	2.52	1	1	1	317	36.449	5.13525	1.08161	1.04921	1.10398	1.07827	1.005	0.854396	1.05177	0.970388	1.11117	0.154946
O43876	Olfactory receptor (Fragment) OS=Homo sapiens GN=OR17-130 PE=3 SV=1 - [O43876_HUMAN]	6.02	1	1	1	216	23.673	6.88818	1.25448	1.03209	0.763529	1.0167	1.23153	0.962033	1.13494	1.1095	0.91636	0.598193
D6RC18	Pre-mRNA-splicing factor ISY1 homolog OS=Homo sapiens GN=ISY1 PE=1 SV=1 - [D6RC18_HUMAN]	5.65	1	1	1	124	14.3024	8.27979	1.16678	1.09448	0.862238	1.04116	1.11548	0.909021	1.09263	1.03904	1.00204	0.985891
H0Y8R5	Receptor of-activated protein C kinase 1 (Fragment) OS=Homo sapiens GN=RACK1 PE=1 SV=1 - [H0Y8R5_HUMAN]	9.42	1	1	2	138	15.1904	7.31299	1.38657	0.951703	0.863936	1.0674	1.09868	0.75935	0.949698	0.935909	1.1405	0.525071
H7BXD8	Galectin (Fragment) OS=Homo sapiens GN=LGALS8 PE=1 SV=1 - [H7BXD8_HUMAN]	5.71	1	1	1	175	19.5563	9.62744	0.916764	1.22854	1.11719	1.0875	1.14321	0.983879	1.02782	1.05164	1.0341	0.744919
C9JZG1	Eukaryotic translation initiation factor 3 subunit B (Fragment) OS=Homo sapiens GN=EIF3B PE=1 SV=1 - [C9JZG1_HUMAN]	4.64	1	1	1	302	33.362	4.36084	0.976535	0.810892	1.41821	1.06855	0.548608	0.944091	1.04401	0.845571	1.2637	0.398391
P07477	Trypsin-1 OS=Homo sapiens GN=PRSS1 PE=1 SV=1 - [TRY1_HUMAN]	11.34	2	2	3	247	26.5411	6.50732	1.31611	0.801288	1.11874	1.07871	0.869376	0.805039	1.10814	0.927517	1.16301	0.438825
J3KS10	60S ribosomal protein L26 (Fragment) OS=Homo sapiens GN=RPL26 PE=4 SV=1 - [J3KS10_HUMAN]	17.46	1	1	3	63	7.31803	10.3452	1.28263	1.05126	1.27512	1.203	0.949037	0.944772	1.06178	0.985196	1.22108	0.0625219
F8VY02	Endoplasmic reticulum resident protein 29 OS=Homo sapiens GN=ERP29 PE=1 SV=1 - [F8VY02_HUMAN]	15.63	2	2	2	160	18.1044	8.00146	0.924145	1.11764	1.16557	1.06912	0.679722	1.0537	0.894756	0.876059	1.22037	0.21485
B7Z5E9	cDNA FLJ58043, highly similar to Estrogen-related receptor gamma OS=Homo sapiens PE=2 SV=1 - [B7Z5E9_HUMAN]	3.3	1	1	1	273	31.0593	6.65381	0.918446	0.994958	1.16824	1.02721	0.96335	1.08312	1.07618	1.04088	0.986868	0.877856
F5H0N4	Peptidylprolyl isomerase (Fragment) OS=Homo sapiens GN=FKBP2 PE=1 SV=1 - [F5H0N4_HUMAN]	6.86	1	1	1	102	11.2829	9.24658	1.02035	1.04244	1.44332	1.1687	0.62627	0.938961	0.809501	0.791577	1.47642	0.0838653
H3BRV9	Nuclear transport factor 2 (Fragment) OS=Homo sapiens GN=NUTF2 PE=1 SV=1 - [H3BRV9_HUMAN]	5.61	1	1	2	107	12.151	5.33838	0.949055	0.95267	1.24672	1.04948	0.706742	0.979992	1.02029	0.90234	1.16307	0.350656
I3V9V3	Dipeptidyl peptidase 1 isoform a preproprotein (Fragment) OS=Homo sapiens GN=CTSC PE=4 SV=1 - [I3V9V3_HUMAN]	14.55	1	1	1	55	6.17992	7.28369	0.942869	1.28472	0.97187	1.06649	0.965412	1.00925	0.943295	0.972651	1.09648	0.446038
Q5J908	HCCR-binding protein 2 OS=Homo sapiens PE=2 SV=1 - [Q5J908_HUMAN]	7.83	1	1	1	115	12.5784	4.90674	0.930618	1.08608	1.3625	1.1264	0.373125	1.15449	0.747059	0.758224	1.48558	0.22758
H3BMF9	Semaphorin-7A (Fragment) OS=Homo sapiens GN=SEMA7A PE=1 SV=1 - [H3BMF9_HUMAN]	16.25	1	1	1	80	9.57572	6.04932	0.909065	0.902775	1.00002	0.937287	0.890165	0.892021	0.782925	0.855037	1.0962	0.160607
H0YJT7	A-kinase anchor protein 6 (Fragment) OS=Homo sapiens GN=AKAP6 PE=4 SV=1 - [H0YJT7_HUMAN]	5.93	1	1	1	118	13.8631	9.74463	1.27508	0.898193	1.22438	1.13255	0.931196	0.958373	1.172	1.02052	1.10977	0.469926
F5GYN4	Ubiquitin thioesterase OTUB1 OS=Homo sapiens GN=OTUB1 PE=1 SV=1 - [F5GYN4_HUMAN]	4.98	1	1	1	241	28.033	5.2876	1.04943	0.934799	1.31582	1.10002	0.442644	1.11793	0.877537	0.812703	1.35353	0.275355
E5RIR0	Fatty acid-binding protein, adipocyte OS=Homo sapiens GN=FABP4 PE=1 SV=1 - [E5RIR0_HUMAN]	30.77	1	1	1	39	4.57414	4.43701	1.11124	0.874734	0.88033	0.955434	1.08242	1.04176	1.17195	1.09871	0.869597	0.174511
B8ZZQ6	Prothymosin alpha OS=Homo sapiens GN=PTMA PE=1 SV=1 - [B8ZZQ6_HUMAN]	13.08	1	1	1	107	11.7518	3.81494	1.23036	1.03283	1.63583	1.29967	0.313773	1.14363	0.603485	0.686962	1.89191	0.111547
L0R599	Alternative protein CIRH1A OS=Homo sapiens GN=CIRH1A PE=4 SV=1 - [L0R599_HUMAN]	23.08	1	1	1	65	7.68968	9.42236	1.20466	0.902299	0.822595	0.976516	1.04997	0.707246	1.12487	0.960695	1.01647	0.931689
Q67AN3	MHC class II antigen (Fragment) OS=Homo sapiens GN=HLA-DPB1 PE=4 SV=1 - [Q67AN3_HUMAN]	14	1	1	1	50	6.03389	4.75439	1.25192	0.787519	1.79964	1.27969	0.798221	1.40151	1.06389	1.08787	1.17633	0.603416
A0A090N901	Similar to TSH receptor suppressor element-binding protein-1 TSEP-1 OS=Homo sapiens GN=LOC402321 PE=4 SV=1 - [A0A090N901_HUMAN]	9.68	1	1	1	186	19.7183	5.10986	1.11194	1.11504	0.878844	1.03527	1.10339	0.991262	0.995974	1.03021	1.00492	0.956055
U3KQQ1	Gamma-enolase (Fragment) OS=Homo sapiens GN=ENO2 PE=1 SV=1 - [U3KQQ1_HUMAN]	20.93	1	1	1	86	9.47483	4.84326	1.09878	1.13512	0.552004	0.928635	0.735709	1.26052	1.61726	1.2045	0.770974	0.434606
A0A0G2JJQ0	Proteasome subunit beta type-9 (Fragment) OS=Homo sapiens GN=PSMB9 PE=1 SV=1 - [A0A0G2JJQ0_HUMAN]	7.63	1	1	1	131	13.8909	4.86865	1.0658	1.16589	1.60706	1.27959	0.802969	0.910701	0.743433	0.819034	1.56231	0.0565576
A0A0F7T8I6	IGHV4-31 protein (Fragment) OS=Homo sapiens GN=IGHV4-31 PE=4 SV=1 - [A0A0F7T8I6_HUMAN]	15	1	2	2	100	10.8393	8.44092	0.52923	0.614057	0.332094	0.491794	1.10149	0.851499	1.9937	1.31556	0.373828	0.0820162
A0A0J9YXL8	P protein (Fragment) OS=Homo sapiens GN=OCA2 PE=4 SV=1 - [A0A0J9YXL8_HUMAN]	1.38	1	1	1	724	81.0539	7.60596	0.931225	1.38422	0.856845	1.05743	0.793577	0.968831	0.998775	0.920394	1.14889	0.481533
A0A0G2JMI3	Immunoglobulin heavy variable 1-69-2 OS=Homo sapiens GN=IGHV1-69-2 PE=3 SV=2 - [HV692_HUMAN]	5.98	1	1	1	117	12.8622	4.84326	0.523395	0.462448	0.463038	0.48296	0.611294	0.40816	5.12052	2.04666	0.235975	0.366838
A0A0S2Z5F6	Proline-serine-threonine phosphatase interacting protein 2 isoform 1 (Fragment) OS=Homo sapiens GN=PSTPIP2 PE=2 SV=1 - [A0A0S2Z5F6_HUMAN]	4.17	1	1	1	312	36.4225	8.70459	0.859936	1.14557	1.7757	1.2604	0.403172	0.896715	0.847634	0.71584	1.76073	0.156633
A0A109PP82	MS-C2 light chain variable region (Fragment) OS=Homo sapiens PE=2 SV=1 - [A0A109PP82_HUMAN]	14.02	1	1	1	107	11.7168	8.49951	0.925588	0.569103	1.1214	0.872032	0.969913	0.847334	1.39581	1.07102	0.814207	0.439162
A0A1B0GTE1	Uncharacterized protein (Fragment) OS=Homo sapiens GN=LOC100289279 PE=4 SV=1 - [A0A1B0GTE1_HUMAN]	2.03	1	1	1	492	54.6149	9.15869	1.04388	0.99011	0.965089	0.999693	0.969793	0.951565	1.11901	1.01346	0.986419	0.823809
A0A1W2PS52	Cystatin-B OS=Homo sapiens GN=CSTB PE=1 SV=1 - [A0A1W2PS52_HUMAN]	14.46	2	2	2	83	9.01258	9.29053	1.17114	0.847425	0.990346	1.00297	0.825563	1.01218	1.37545	1.07107	0.936424	0.733711
