# Supplementary material for: Proteomic profiling analysis of postmenopausal osteoporosis and osteopenia identifies potential proteins associated with low bone mineral density
Source: PeerJ. 2020 Apr 14;8:e9009. doi: 10.7717/peerj.9009 (PMC7164430; doi:10.7717/peerj.9009)
Supplement: Supplemental Information 4 — The red filled columes represent up-regulation DAPs, and green filled columes represent down-regulation DAPs [file peerj-08-9009-s004.xlsx]

## Sheet: OP versus ON
Protein quantification and differential analysis in samples between OP and ON groups
The red filled columes represent up-regulation DAPs, and green filled columes represent down-regulation DAPs
Accession	Description	Coverage	Unique Peptides	Peptides	PSMs	AAs	MW [kDa]	calc. pI	SOP-1/REF	SOP-2/REF	SOP-3/REF	average SOP	ON-1/REF	ON-2/REF	ON-3/REF	average ON	SOP/ON	t test p value
B7Z1F8	cDNA FLJ53025, highly similar to Complement C4-B OS=Homo sapiens PE=2 SV=1 - [B7Z1F8_HUMAN]	71.11	2	18	516	270	30.4248	7.98682	1.38635	1.43762	1.70883	1.51093	0.848867	0.720632	0.871349	0.813616	1.85706	0.00322594
I3L3H7	Collagen alpha-1(I) chain (Fragment) OS=Homo sapiens GN=COL1A1 PE=1 SV=1 - [I3L3H7_HUMAN]	7.79	1	1	1	154	16.35	5.69385	1.47915	1.24196	1.28695	1.33602	0.749882	1.02281	0.976289	0.916328	1.45802	0.0196126
B7Z539	cDNA FLJ56954, highly similar to Inter-alpha-trypsin inhibitor heavy chain H1 OS=Homo sapiens PE=2 SV=1 - [B7Z539_HUMAN]	49.61	2	27	1053	645	72.074	7.6792	1.12931	1.06167	1.15953	1.11684	0.830986	0.740148	0.738651	0.769928	1.45057	0.00117878
J3KS10	60S ribosomal protein L26 (Fragment) OS=Homo sapiens GN=RPL26 PE=4 SV=1 - [J3KS10_HUMAN]	17.46	1	1	3	63	7.31803	10.3452	1.28263	1.05126	1.27512	1.203	0.984151	0.82332	0.870479	0.89265	1.34768	0.0257868
P43652	Afamin OS=Homo sapiens GN=AFM PE=1 SV=1 - [AFAM_HUMAN]	62.44	39	39	586	599	69.024	5.89697	1.15783	1.235	1.06149	1.15144	0.858617	0.863682	0.979974	0.900758	1.2783	0.0172488
Q5U000	Cathepsin Z OS=Homo sapiens PE=2 SV=1 - [Q5U000_HUMAN]	5.61	2	2	3	303	33.8462	7.10791	1.17472	1.03039	1.05478	1.08663	0.82643	0.785627	0.967851	0.859969	1.26357	0.0331075
Q8TCF0	LBP protein OS=Homo sapiens GN=LBP PE=2 SV=1 - [Q8TCF0_HUMAN]	28.93	10	10	32	477	52.9007	6.75635	1.14579	1.10262	0.955005	1.0678	0.816632	0.927441	0.795028	0.846367	1.26163	0.035326
Q9H3P7	Golgi resident protein GCP60 OS=Homo sapiens GN=ACBD3 PE=1 SV=4 - [GCP60_HUMAN]	1.14	1	1	1	528	60.556	5.05908	1.14504	1.01008	1.13821	1.09778	0.918495	0.851301	0.861477	0.877091	1.25161	0.0105045
B7Z550	Complement component 8, beta polypeptide, isoform CRA_b OS=Homo sapiens GN=C8B PE=2 SV=1 - [B7Z550_HUMAN]	67.86	31	31	301	529	60.101	7.76709	1.14817	1.12049	1.06584	1.1115	0.955082	0.876037	0.884747	0.905289	1.22779	0.00406489
Q59FI2	Protein tyrosine phosphatase, receptor type, F isoform 2 variant (Fragment) OS=Homo sapiens PE=2 SV=1 - [Q59FI2_HUMAN]	2.45	3	3	3	1552	174.769	6.63916	1.18285	1.0671	1.0942	1.11472	0.998505	0.871517	0.910943	0.926988	1.20251	0.0215686
P07357	Complement component C8 alpha chain OS=Homo sapiens GN=C8A PE=1 SV=2 - [CO8A_HUMAN]	46.4	20	20	225	584	65.121	6.46826	1.15411	1.08772	1.05514	1.09899	0.953421	0.9085	0.881885	0.914602	1.2016	0.00676308
Q584P1	Uncharacterized protein PCYOX1 (Fragment) OS=Homo sapiens GN=PCYOX1 PE=4 SV=1 - [Q584P1_HUMAN]	19.85	7	7	16	398	45.1098	5.94775	0.875059	0.928305	0.896468	0.899944	1.14967	1.00153	1.16629	1.10583	0.813817	0.0195985
O95445	Apolipoprotein M OS=Homo sapiens GN=APOM PE=1 SV=2 - [APOM_HUMAN]	46.81	8	8	23	188	21.2394	6.01123	0.935586	0.904882	0.901845	0.914104	1.20023	1.14447	1.05681	1.13384	0.806205	0.00699843
P49913	Cathelicidin antimicrobial peptide OS=Homo sapiens GN=CAMP PE=1 SV=1 - [CAMP_HUMAN]	14.71	3	3	3	170	19.2892	9.40771	0.863146	0.82913	0.790416	0.827564	1.2406	1.1448	1.04322	1.14287	0.724109	0.00655424
K7ERI9	Apolipoprotein C-I (Fragment) OS=Homo sapiens GN=APOC1 PE=1 SV=1 - [K7ERI9_HUMAN]	35.06	4	4	35	77	8.64167	6.7124	0.715822	0.807402	0.800036	0.77442	1.58996	1.24282	1.26844	1.36707	0.566481	0.00683057
B4DLF7	cDNA FLJ60294 OS=Homo sapiens PE=2 SV=1 - [B4DLF7_HUMAN]	2.28	1	1	1	964	105.055	9.15869	0.222141	0.624265	0.403272	0.416559	1.29729	1.2271	0.871684	1.13203	0.367977	0.0152001
P08603	Complement factor H OS=Homo sapiens GN=CFH PE=1 SV=4 - [CFAH_HUMAN]	59.79	3	67	1836	1231	139.005	6.60986	1.10175	1.00743	1.13181	1.08033	0.940884	0.926086	0.930976	0.932649	1.15835	0.0173193
P13671	Complement component C6 OS=Homo sapiens GN=C6 PE=1 SV=3 - [CO6_HUMAN]	45.18	3	39	470	934	104.718	6.75635	1.16578	1.02629	1.05201	1.08136	0.967255	0.891744	0.900411	0.919803	1.17565	0.0301126
P05546	Heparin cofactor 2 OS=Homo sapiens GN=SERPIND1 PE=1 SV=3 - [HEP2_HUMAN]	55.71	24	24	348	499	57.0342	6.90283	1.09749	1.03617	1.05393	1.06253	0.957074	0.95765	0.951143	0.955289	1.11226	0.00426222
P04004	Vitronectin OS=Homo sapiens GN=VTN PE=1 SV=1 - [VTNC_HUMAN]	47.28	18	18	427	478	54.2712	5.79541	1.099	1.10947	1.08833	1.09894	0.972021	0.852829	1.01036	0.94507	1.16281	0.0323574
Q6LAM1	Heavy chain of factor I (Fragment) OS=Homo sapiens PE=2 SV=1 - [Q6LAM1_HUMAN]	57.32	1	19	308	321	35.8589	7.59131	1.01385	1.05352	1.08816	1.05184	0.929298	0.879336	0.923938	0.910857	1.15478	0.00614965
Q53GY3	Angiotensinogen variant (Fragment) OS=Homo sapiens PE=2 SV=1 - [Q53GY3_HUMAN]	44.54	16	16	227	485	53.0505	6.23975	1.19552	1.04966	1.12208	1.12242	1.0079	0.882069	0.930924	0.940297	1.19369	0.0309797
P36955	Pigment epithelium-derived factor OS=Homo sapiens GN=SERPINF1 PE=1 SV=4 - [PEDF_HUMAN]	52.63	20	20	221	418	46.2833	6.37939	1.10173	1.04506	0.998091	1.0483	0.904258	0.843498	0.944132	0.897296	1.16828	0.0226431
P07360	Complement component C8 gamma chain OS=Homo sapiens GN=C8G PE=1 SV=3 - [CO8G_HUMAN]	79.7	12	12	117	202	22.2635	8.30908	1.0843	1.04276	1.07503	1.06736	0.967778	0.94075	0.859598	0.922708	1.15677	0.0142632
P26927	Hepatocyte growth factor-like protein OS=Homo sapiens GN=MST1 PE=1 SV=2 - [HGFL_HUMAN]	49.51	20	26	106	711	80.2675	7.6792	1.15175	1.02144	1.08869	1.08729	0.974936	0.923608	0.962766	0.95377	1.13999	0.0304513
P15169	Carboxypeptidase N catalytic chain OS=Homo sapiens GN=CPN1 PE=1 SV=1 - [CBPN_HUMAN]	38.86	13	13	97	458	52.2533	7.34229	1.15132	1.0069	1.07486	1.07769	0.976224	0.958832	0.935526	0.956861	1.12628	0.0494406
Q9UGM5	Fetuin-B OS=Homo sapiens GN=FETUB PE=1 SV=2 - [FETUB_HUMAN]	37.96	14	14	80	382	42.028	6.82959	1.06127	1.02786	1.0711	1.05341	0.971882	0.881104	0.953909	0.935632	1.12588	0.0184855
P01034	Cystatin-C OS=Homo sapiens GN=CST3 PE=1 SV=1 - [CYTC_HUMAN]	34.25	4	4	45	146	15.7891	8.74854	1.153	1.0126	1.09793	1.08784	0.877619	0.89433	0.980575	0.917508	1.18565	0.0303032
O00391	Sulfhydryl oxidase 1 OS=Homo sapiens GN=QSOX1 PE=1 SV=3 - [QSOX1_HUMAN]	34.81	24	24	62	747	82.5255	8.92432	1.11441	1.02378	1.06389	1.06736	0.924974	0.929392	0.958951	0.937772	1.13819	0.0102014
B7Z538	cDNA FLJ60766, highly similar to Hepatocyte growth factor-like protein OS=Homo sapiens PE=2 SV=1 - [B7Z538_HUMAN]	29.88	1	7	25	338	36.789	8.48486	1.16801	1.02462	1.14198	1.11153	0.999746	0.875498	0.963837	0.94636	1.17454	0.045384
F5GZZ9	Scavenger receptor cysteine-rich type 1 protein M130 OS=Homo sapiens GN=CD163 PE=1 SV=1 - [F5GZZ9_HUMAN]	17.94	18	18	39	1109	120.244	6.1001	1.15062	1.04142	1.11723	1.10309	0.860334	1.00169	0.936687	0.932904	1.18242	0.0308549
P04406	Glyceraldehyde-3-phosphate dehydrogenase OS=Homo sapiens GN=GAPDH PE=1 SV=3 - [G3P_HUMAN]	40.3	10	10	37	335	36.0304	8.45557	0.902922	0.965047	1.04127	0.969747	1.17265	1.11477	1.07217	1.11986	0.865952	0.0386404
Q6LDG4	Complement protein (Fragment) OS=Homo sapiens GN=C2 PE=4 SV=1 - [Q6LDG4_HUMAN]	30.16	2	3	20	63	7.1587	7.18115	1.05432	1.10003	1.03321	1.06252	0.929883	0.821499	0.919735	0.890372	1.19334	0.0123869
A0A1B0GW44	Cathepsin D OS=Homo sapiens GN=CTSD PE=1 SV=1 - [A0A1B0GW44_HUMAN]	22.22	8	8	13	405	43.6602	6.53662	1.11628	1.05114	1.03478	1.0674	0.866877	0.933309	0.880673	0.89362	1.19447	0.00562888
B4DDL4	cDNA FLJ53966, moderately similar to Homo sapiens cytidylate kinase (CMPK), mRNA OS=Homo sapiens PE=2 SV=1 - [B4DDL4_HUMAN]	15.47	2	2	5	181	20.5459	8.95361	0.939367	0.969629	1.01221	0.973735	1.13891	1.08494	1.12837	1.11741	0.871423	0.00585618
A0A0A7E7X3	Aminopeptidase (Fragment) OS=Homo sapiens GN=ERAP1 PE=2 SV=1 - [A0A0A7E7X3_HUMAN]	6.59	6	6	7	941	107.163	6.40479	1.05855	1.14638	1.08263	1.09585	0.95661	0.963936	1.0269	0.982482	1.11539	0.0300927
Q86YW5	Trem-like transcript 1 protein OS=Homo sapiens GN=TREML1 PE=1 SV=2 - [TRML1_HUMAN]	12.54	3	3	10	311	32.6579	6.04932	0.942666	1.01288	0.955751	0.970433	1.09058	1.13367	1.06831	1.09752	0.884203	0.0116544
Q59EZ3	Insulin-like growth factor 2 receptor variant (Fragment) OS=Homo sapiens PE=2 SV=1 - [Q59EZ3_HUMAN]	2.86	6	6	6	2414	265.943	5.8335	1.0287	1.07051	1.12554	1.07492	0.976042	0.976973	0.889356	0.947457	1.13453	0.0342938
O95479	GDH/6PGL endoplasmic bifunctional protein OS=Homo sapiens GN=H6PD PE=1 SV=2 - [G6PE_HUMAN]	6.19	5	5	5	791	88.8364	7.29834	1.11144	1.04279	1.0808	1.07834	0.954471	1.00939	0.999642	0.987836	1.09162	0.0255913
F8WE71	Serine/threonine-protein phosphatase PP1-beta catalytic subunit OS=Homo sapiens GN=PPP1CB PE=1 SV=1 - [F8WE71_HUMAN]	26.56	1	1	1	64	6.93966	5.24951	0.831094	0.954916	0.874375	0.886795	1.11423	0.959409	1.10917	1.06094	0.83586	0.0493029
G3V2V8	Epididymal secretory protein E1 (Fragment) OS=Homo sapiens GN=NPC2 PE=1 SV=1 - [G3V2V8_HUMAN]	26.23	3	3	4	122	13.0697	8.33838	1.14987	0.999075	1.03037	1.05977	0.934183	0.938806	0.920627	0.931205	1.13807	0.0498822
B7ZLI0	Reticulon 4 receptor-like 2 OS=Homo sapiens GN=RTN4RL2 PE=2 SV=1 - [B7ZLI0_HUMAN]	3.81	2	2	2	420	46.1046	7.62061	0.983023	1.07672	1.11015	1.05663	0.889594	0.893867	0.978048	0.920503	1.14789	0.0462672
Q7Z7M0	Multiple epidermal growth factor-like domains protein 8 OS=Homo sapiens GN=MEGF8 PE=1 SV=2 - [MEGF8_HUMAN]	1.62	5	5	6	2845	302.902	6.87354	1.16656	1.01913	1.17558	1.12043	0.955974	0.978097	0.981925	0.971999	1.1527	0.0445543
A0A140TA77	Receptor-type tyrosine-protein phosphatase C (Fragment) OS=Homo sapiens GN=PTPRC PE=1 SV=1 - [A0A140TA77_HUMAN]	2.41	1	1	1	457	51.1488	6.59521	1.0211	1.0208	0.853653	0.965186	1.18399	1.11708	1.10817	1.13641	0.849327	0.0477478
A0A0G2JRQ8	MLX-interacting protein (Fragment) OS=Homo sapiens GN=MLXIP PE=4 SV=4 - [A0A0G2JRQ8_HUMAN]	8.22	1	1	1	73	8.29098	4.76709	1.11583	0.9807	1.08604	1.06086	0.860807	0.914617	0.957515	0.91098	1.16452	0.0391607
Q8TDY8	Immunoglobulin superfamily DCC subclass member 4 OS=Homo sapiens GN=IGDCC4 PE=1 SV=1 - [IGDC4_HUMAN]	0.8	1	1	1	1250	134.126	6.20166	1.05824	1.07045	1.06102	1.06324	0.973644	1.00464	0.998397	0.992226	1.07157	0.00220511
C0JYY2	Apolipoprotein B (Including Ag(X) antigen) OS=Homo sapiens GN=APOB PE=4 SV=1 - [C0JYY2_HUMAN]	66.4	134	278	4985	4563	515.236	7.04932	1.0249	0.992208	0.860131	0.959078	1.10468	0.945556	1.06913	1.03979	0.922377	0.31147
P01023	Alpha-2-macroglobulin OS=Homo sapiens GN=A2M PE=1 SV=3 - [A2MG_HUMAN]	61.74	61	72	3010	1474	163.188	6.45557	0.430825	0.354901	0.339693	0.37514	1.57873	1.55186	0.413473	1.18135	0.317551	0.104384
A0A0G2JPR0	Complement C4-A OS=Homo sapiens GN=C4A PE=1 SV=1 - [A0A0G2JPR0_HUMAN]	64.11	1	88	2831	1744	192.754	7.03467	1.74876	0.885911	0.257528	0.964068	0.568988	0.608645	1.58235	0.919996	1.04791	0.939395
P0C0L5	Complement C4-B OS=Homo sapiens GN=C4B PE=1 SV=2 - [CO4B_HUMAN]	64.11	1	88	2843	1744	192.631	7.26904	1.58011	0.44335	0.222972	0.748811	1.14003	1.32759	1.0543	1.17397	0.637843	0.37692
P0C0L4	Complement C4-A OS=Homo sapiens GN=C4A PE=1 SV=2 - [CO4A_HUMAN]	64.11	1	88	2810	1744	192.664	7.07861	1.02276	0.612428	0.657642	0.764278	0.667157	1.05145	0.592967	0.770525	0.991892	0.975667
A0A024R462	Fibronectin 1, isoform CRA_n OS=Homo sapiens GN=FN1 PE=4 SV=1 - [A0A024R462_HUMAN]	57.32	57	96	1972	2355	259.049	5.73193	1.32201	1.01811	0.798484	1.0462	0.917686	1.07181	1.02166	1.00372	1.04233	0.801826
A8K5T0	cDNA FLJ75416, highly similar to Homo sapiens complement factor H (CFH), mRNA OS=Homo sapiens PE=2 SV=1 - [A8K5T0_HUMAN]	57.92	1	65	1804	1231	138.859	6.7124	0.900235	1.24022	0.770551	0.970335	1.14849	0.605855	0.946333	0.900226	1.07788	0.756782
P01008	Antithrombin-III OS=Homo sapiens GN=SERPINC1 PE=1 SV=1 - [ANT3_HUMAN]	66.81	32	32	1214	464	52.5689	6.7124	1.15101	0.985485	1.00932	1.04861	1.03858	0.917676	1.01154	0.989266	1.05998	0.401842
P02774	Vitamin D-binding protein OS=Homo sapiens GN=GC PE=1 SV=1 - [VTDB_HUMAN]	84.39	32	42	1801	474	52.929	5.5415	1.15107	1.03202	0.994459	1.05918	1.0054	0.888271	1.00263	0.965433	1.0971	0.198966
Q59HB3	Apolipoprotein B variant (Fragment) OS=Homo sapiens PE=2 SV=1 - [Q59HB3_HUMAN]	61.98	1	90	1659	1615	183.465	6.80029	0.869032	1.08567	0.773151	0.909285	1.19128	0.977559	0.936214	1.03502	0.87852	0.35962
P02790	Hemopexin OS=Homo sapiens GN=HPX PE=1 SV=2 - [HEMO_HUMAN]	67.53	30	30	1529	462	51.6433	7.02002	1.11579	1.01446	0.995126	1.04179	0.988323	0.892328	0.947793	0.942815	1.10498	0.101041
P00450	Ceruloplasmin OS=Homo sapiens GN=CP PE=1 SV=1 - [CERU_HUMAN]	59.44	50	55	1915	1065	122.128	5.71924	1.105	0.999261	0.968699	1.02432	0.984977	0.965646	1.00027	0.983632	1.04136	0.392517
P01011	Alpha-1-antichymotrypsin OS=Homo sapiens GN=SERPINA3 PE=1 SV=2 - [AACT_HUMAN]	48.7	19	19	1201	423	47.6205	5.51611	1.18091	0.956806	0.990603	1.04277	0.990784	0.936161	0.936842	0.954596	1.09237	0.288247
B7ZKJ8	ITIH4 protein OS=Homo sapiens GN=ITIH4 PE=1 SV=1 - [B7ZKJ8_HUMAN]	56.68	1	44	1316	935	103.816	6.88818	1.10079	0.771723	1.27793	1.05015	0.868859	0.892257	0.944478	0.901865	1.16442	0.378794
B2RMS9	Inter-alpha (Globulin) inhibitor H4 (Plasma Kallikrein-sensitive glycoprotein) OS=Homo sapiens GN=ITIH4 PE=2 SV=1 - [B2RMS9_HUMAN]	56.45	1	44	1317	930	103.298	6.97607	1.13959	0.704986	1.30311	1.04923	0.752169	1.11994	0.892656	0.921589	1.1385	0.572926
B7Z544	cDNA FLJ51742, highly similar to Inter-alpha-trypsin inhibitor heavy chain H4 OS=Homo sapiens PE=2 SV=1 - [B7Z544_HUMAN]	54.95	1	40	1258	888	98.2863	6.59521	1.20063	0.918308	1.21052	1.10982	0.876531	0.993359	0.974363	0.948084	1.17059	0.189409
A2RTY6	Inter-alpha (Globulin) inhibitor H2 OS=Homo sapiens GN=ITIH2 PE=2 SV=1 - [A2RTY6_HUMAN]	48.1	38	38	1290	946	106.37	6.85889	1.15019	1.03478	1.05706	1.08068	1.04162	0.906364	0.935173	0.961053	1.12448	0.092063
B4E1Z4	cDNA FLJ55673, highly similar to Complement factor B (EC 3.4.21.47) OS=Homo sapiens PE=1 SV=1 - [B4E1Z4_HUMAN]	60.43	20	69	1343	1266	140.853	7.18115	1.07905	1.01828	1.02773	1.04169	0.96381	0.895694	1.01537	0.958291	1.08703	0.102135
B4E1C2	Kininogen 1, isoform CRA_b OS=Homo sapiens GN=KNG1 PE=2 SV=1 - [B4E1C2_HUMAN]	58.23	10	40	1120	644	71.8701	6.81494	1.1261	1.07258	1.07173	1.09014	0.757527	1.06103	1.01407	0.944209	1.15455	0.203198
B4DPP8	cDNA FLJ53075, highly similar to Kininogen-1 OS=Homo sapiens PE=2 SV=1 - [B4DPP8_HUMAN]	74.7	3	33	993	415	46.4668	6.43018	1.14065	1.05462	1.18466	1.12664	0.572956	1.11288	1.03257	0.906136	1.24335	0.270225
B4DU16	cDNA FLJ54550, highly similar to Homo sapiens fibronectin 1 (FN1), transcript variant 6, mRNA OS=Homo sapiens PE=2 SV=1 - [B4DU16_HUMAN]	61.07	1	38	890	894	98.0948	6.23975	1.09803	1.41666	0.625862	1.04685	1.38084	1.36147	0.85535	1.19922	0.872943	0.62358
P00747	Plasminogen OS=Homo sapiens GN=PLG PE=1 SV=2 - [PLMN_HUMAN]	70.74	52	52	1126	810	90.5102	7.23975	1.09869	1.03175	1.06127	1.0639	0.990663	0.886408	0.995505	0.957525	1.11109	0.0584591
P02765	Alpha-2-HS-glycoprotein OS=Homo sapiens GN=AHSG PE=1 SV=1 - [FETUA_HUMAN]	56.68	9	16	939	367	39.2997	5.71924	1.21721	0.917376	0.947958	1.02751	0.946492	0.888915	1.00013	0.945179	1.08711	0.458743
P00734	Prothrombin OS=Homo sapiens GN=F2 PE=1 SV=2 - [THRB_HUMAN]	60.77	36	36	890	622	69.9921	5.89697	1.0553	1.02309	1.05736	1.04525	1.04683	0.898171	0.991182	0.978727	1.06797	0.211405
B4E1B2	cDNA FLJ53691, highly similar to Serotransferrin OS=Homo sapiens PE=2 SV=1 - [B4E1B2_HUMAN]	73.3	3	53	1085	678	74.7834	7.12256	0.664297	1.0273	0.761233	0.817609	1.4048	2.35991	0.873937	1.54622	0.52878	0.17927
Q53H26	Transferrin variant (Fragment) OS=Homo sapiens PE=2 SV=1 - [Q53H26_HUMAN]	68.48	1	52	1078	698	77.0296	7.03467	0.626655	1.65456	1.914	1.3984	0.837795	2.29921	0.911353	1.34945	1.03627	0.940558
P00738	Haptoglobin OS=Homo sapiens GN=HP PE=1 SV=1 - [HPT_HUMAN]	65.76	13	25	760	406	45.1766	6.58057	0.371214	0.309237	0.319145	0.333199	0.910359	2.48694	0.297383	1.23156	0.27055	0.240573
P02675	Fibrinogen beta chain OS=Homo sapiens GN=FGB PE=1 SV=2 - [FIBB_HUMAN]	74.34	30	30	878	491	55.8923	8.26514	1.09809	0.84206	0.775463	0.905205	0.961799	1.29072	0.749608	1.00071	0.904564	0.633993
Q7Z7Q0	APOB protein OS=Homo sapiens GN=APOB PE=2 SV=1 - [Q7Z7Q0_HUMAN]	70.91	1	56	859	825	92.2752	7.41553	0.200912	0.146861	1.34232	0.563365	1.00464	1.87127	0.924873	1.26693	0.444671	0.227288
P02671	Fibrinogen alpha chain OS=Homo sapiens GN=FGA PE=1 SV=2 - [FIBA_HUMAN]	45.03	37	37	912	866	94.9144	6.01123	1.10847	0.835117	0.762748	0.902113	0.961729	1.27552	0.726485	0.987912	0.913151	0.676107
B7Z8Q7	cDNA FLJ53871, highly similar to Inter-alpha-trypsin inhibitor heavy chain H4 OS=Homo sapiens PE=2 SV=1 - [B7Z8Q7_HUMAN]	51.25	1	24	690	560	62.1228	5.51611	1.0409	0.960458	0.790194	0.930516	0.906342	1.00143	1.14131	1.01636	0.915537	0.441522
P01031	Complement C5 OS=Homo sapiens GN=C5 PE=1 SV=4 - [CO5_HUMAN]	57.82	81	81	871	1676	188.186	6.52197	1.22178	0.918751	0.914574	1.01837	0.968795	0.881567	0.942245	0.930869	1.094	0.45128
Q5VY30	Retinol binding protein 4, plasma, isoform CRA_b OS=Homo sapiens GN=RBP4 PE=1 SV=2 - [Q5VY30_HUMAN]	77.89	13	13	455	199	22.9591	6.0874	0.960551	0.949153	0.747558	0.885754	1.00948	0.945543	1.00989	0.988306	0.896235	0.22962
Q9Y490	Talin-1 OS=Homo sapiens GN=TLN1 PE=1 SV=3 - [TLN1_HUMAN]	59.35	99	120	549	2541	269.599	6.07471	0.967408	1.01366	1.3139	1.09832	1.06801	0.861832	1.14087	1.02357	1.07303	0.614414
H7C5H1	Complement factor B (Fragment) OS=Homo sapiens GN=CFB PE=1 SV=1 - [H7C5H1_HUMAN]	81.31	1	24	738	305	34.6699	7.06396	0.764721	0.899423	0.898647	0.854264	0.896665	0.904484	1.82625	1.20913	0.706509	0.318606
B7Z556	cDNA FLJ56822, highly similar to Alpha-2-HS-glycoprotein OS=Homo sapiens PE=2 SV=1 - [B7Z556_HUMAN]	45.31	1	8	525	245	27.3369	6.52197	1.33113	0.90975	0.631966	0.957617	0.986107	0.83389	1.13104	0.983678	0.973506	0.911656
P06396	Gelsolin OS=Homo sapiens GN=GSN PE=1 SV=1 - [GELS_HUMAN]	54.09	1	39	601	782	85.6442	6.27783	1.12766	0.939918	1.13998	1.06919	1.04815	0.780191	1.01282	0.947054	1.12896	0.313772
P02768	Serum albumin OS=Homo sapiens GN=ALB PE=1 SV=2 - [ALBU_HUMAN]	79.31	1	51	736	609	69.3215	6.27783	0.76055	1.49038	0.487791	0.912908	0.392732	3.45374	1.48193	1.77613	0.513986	0.412437
B7Z9A0	cDNA FLJ56212, highly similar to Gelsolin OS=Homo sapiens PE=2 SV=1 - [B7Z9A0_HUMAN]	57.22	1	39	587	755	83.0517	5.84619	1.10367	0.848505	0.844597	0.932258	1.04627	0.972323	1.04341	1.02067	0.913382	0.37706
Q9UNU2	Complement protein C4B frameshift mutant (Fragment) OS=Homo sapiens GN=C4B PE=4 SV=1 - [Q9UNU2_HUMAN]	66.1	1	15	492	354	38.1144	8.52881	0.910904	1.02451	2.00556	1.31366	1.01248	0.599563	0.799876	0.803975	1.63396	0.23763
B7Z992	cDNA FLJ53698, highly similar to Gelsolin OS=Homo sapiens PE=2 SV=1 - [B7Z992_HUMAN]	54.55	1	37	580	715	78.7827	6.11279	0.962139	0.983453	1.46838	1.13799	1.11217	0.887532	1.18573	1.06181	1.07174	0.706167
P06727	Apolipoprotein A-IV OS=Homo sapiens GN=APOA4 PE=1 SV=3 - [APOA4_HUMAN]	81.82	33	34	723	396	45.3715	5.37646	1.17572	1.05907	0.990576	1.07512	0.853394	0.891708	1.01032	0.918473	1.17055	0.0944943
B2R8I2	cDNA, FLJ93914, highly similar to Homo sapiens histidine-rich glycoprotein (HRG), mRNA OS=Homo sapiens PE=2 SV=1 - [B2R8I2_HUMAN]	54.1	2	25	630	525	59.4748	7.44482	1.06113	0.862834	0.907251	0.943739	1.07701	0.787021	1.00717	0.957067	0.986074	0.906044
P60709	Actin, cytoplasmic 1 OS=Homo sapiens GN=ACTB PE=1 SV=1 - [ACTB_HUMAN]	58.13	1	17	396	375	41.7097	5.47803	1.0293	0.871351	1.46734	1.12266	1.07822	0.992169	1.26688	1.11242	1.0092	0.960818
P04196	Histidine-rich glycoprotein OS=Homo sapiens GN=HRG PE=1 SV=1 - [HRG_HUMAN]	52.57	1	24	622	525	59.5409	7.50342	1.5386	0.467693	1.19143	1.06591	1.06732	1.80326	0.279085	1.04989	1.01526	0.977811
F6KPG5	Albumin (Fragment) OS=Homo sapiens PE=2 SV=1 - [F6KPG5_HUMAN]	82.56	1	51	713	585	66.488	6.03662	0.765517	1.48205	0.427914	0.891827	0.286418	4.09462	1.35536	1.91213	0.466404	0.434506
P63261	Actin, cytoplasmic 2 OS=Homo sapiens GN=ACTG1 PE=1 SV=1 - [ACTG_HUMAN]	58.13	1	17	382	375	41.7658	5.47803	1.02941	1.07909	0.990478	1.03299	1.08217	0.886739	1.27608	1.08166	0.955005	0.6946
Q6MZW0	Uncharacterized protein DKFZp686J11235 (Fragment) OS=Homo sapiens GN=DKFZp686J11235 PE=1 SV=1 - [Q6MZW0_HUMAN]	40.71	1	15	434	506	54.4249	6.771	0.526531	0.481904	0.466514	0.49165	0.856723	2.7265	0.474441	1.35256	0.363497	0.283776
Q6ZW64	cDNA FLJ41552 fis, clone COLON2004478, highly similar to Protein Tro alpha1 H,myeloma OS=Homo sapiens PE=2 SV=1 - [Q6ZW64_HUMAN]	43.32	2	15	434	494	53.2872	6.52197	0.513169	0.336987	0.397558	0.415905	0.600591	3.85904	0.35239	1.60401	0.259291	0.352758
Q96K68	cDNA FLJ14473 fis, clone MAMMA1001080, highly similar to Homo sapiens SNC73 protein (SNC73) mRNA OS=Homo sapiens PE=2 SV=1 - [Q96K68_HUMAN]	44.74	1	16	432	494	53.0542	6.85889	0.451184	0.316423	0.331311	0.366306	0.911889	2.83071	0.435348	1.39265	0.263028	0.234212
Q8NCL6	cDNA FLJ90170 fis, clone MAMMA1000370, highly similar to Ig alpha-1 chain C region OS=Homo sapiens PE=2 SV=1 - [Q8NCL6_HUMAN]	42.19	1	15	431	493	53.1903	6.52197	0.521919	0.302971	0.231287	0.352059	0.702056	3.08912	0.279749	1.35698	0.259444	0.316695
B2R950	cDNA, FLJ94213, highly similar to Homo sapiens pregnancy-zone protein (PZP), mRNA OS=Homo sapiens PE=2 SV=1 - [B2R950_HUMAN]	34.55	29	45	453	1482	163.768	6.37939	0.871359	0.966046	0.606387	0.814598	1.20928	1.31025	0.784625	1.10138	0.739612	0.212826
P02760	Protein AMBP OS=Homo sapiens GN=AMBP PE=1 SV=1 - [AMBP_HUMAN]	48.01	14	14	385	352	38.974	6.25244	1.1148	0.99118	0.955985	1.02066	0.979308	1.0295	0.890142	0.966317	1.05623	0.437613
A8K8Z4	cDNA FLJ78071, highly similar to Human MHC class III complement component C6 mRNA OS=Homo sapiens PE=2 SV=1 - [A8K8Z4_HUMAN]	42.08	1	37	454	934	104.649	6.62451	1.15995	1.3697	0.59577	1.0418	1.06006	1.12674	0.61133	0.932711	1.11696	0.718681
G3XAM2	Complement factor I OS=Homo sapiens GN=CFI PE=1 SV=1 - [G3XAM2_HUMAN]	47.74	7	25	392	576	65.0163	7.50342	0.974589	1.10181	0.994983	1.02379	0.946726	0.96717	0.977301	0.963732	1.06232	0.211863
D6RF20	Vitamin D-binding protein (Fragment) OS=Homo sapiens GN=GC PE=1 SV=1 - [D6RF20_HUMAN]	75.86	1	11	453	145	16.0728	5.8335	1.53197	1.03533	0.851474	1.13959	0.765914	0.705289	1.19663	0.889276	1.28148	0.382532
Q6P5S8	IGK@ protein OS=Homo sapiens GN=IGK@ PE=1 SV=1 - [Q6P5S8_HUMAN]	46.61	1	7	287	236	25.7568	6.32861	0.673866	0.686184	0.419707	0.593252	1.12531	1.7161	0.513368	1.11826	0.530514	0.216309
Q5EFE6	Anti-RhD monoclonal T125 kappa light chain OS=Homo sapiens PE=2 SV=1 - [Q5EFE6_HUMAN]	42.74	1	6	282	234	25.6817	8.42627	0.547959	0.381882	0.510013	0.479951	0.496488	4.74711	0.402415	1.88201	0.255021	0.38348
P00739	Haptoglobin-related protein OS=Homo sapiens GN=HPR PE=2 SV=2 - [HPTR_HUMAN]	50.57	5	17	409	348	39.0047	7.09326	0.475231	0.371784	0.291753	0.379589	1.25693	2.84316	0.472245	1.52411	0.249056	0.17707
A8K2N0	cDNA FLJ77835, highly similar to Homo sapiens complement component 1, s subcomponent (C1S), transcript variant 2, mRNA OS=Homo sapiens PE=2 SV=1 - [A8K2N0_HUMAN]	47.24	25	26	345	688	76.5628	4.98291	1.15797	1.05303	0.915837	1.04228	0.958553	0.949981	0.993928	0.967487	1.0773	0.353892
B2R6W1	cDNA, FLJ93143, highly similar to Homo sapiens complement component 7 (C7), mRNA OS=Homo sapiens PE=2 SV=1 - [B2R6W1_HUMAN]	60.38	1	39	361	843	93.4853	6.48096	1.35468	1.35926	0.870225	1.19472	0.938471	1.00276	0.772358	0.90453	1.32082	0.174868
Q6GMV8	Uncharacterized protein OS=Homo sapiens PE=2 SV=1 - [Q6GMV8_HUMAN]	53.85	2	10	330	234	24.8943	6.66846	0.524769	0.471896	0.398381	0.465015	0.673707	3.24372	0.369396	1.42894	0.325427	0.35032
P10643	Complement component C7 OS=Homo sapiens GN=C7 PE=1 SV=2 - [CO7_HUMAN]	61.57	2	40	363	843	93.4573	6.48096	1.41379	0.978253	0.981823	1.12462	0.962307	0.759032	1.0601	0.927146	1.21299	0.309018
B4E1D8	cDNA FLJ51597, highly similar to C4b-binding protein alpha chain OS=Homo sapiens PE=2 SV=1 - [B4E1D8_HUMAN]	58.4	2	27	488	536	60.3658	6.65381	0.918546	0.831813	0.960018	0.903459	0.985694	1.26585	0.807008	1.01952	0.886164	0.450021
Q8NEJ1	Uncharacterized protein OS=Homo sapiens PE=2 SV=1 - [Q8NEJ1_HUMAN]	52.54	1	10	334	236	25.0083	7.69385	0.474266	0.258927	0.317693	0.350295	0.944853	2.40513	0.320717	1.22357	0.28629	0.232369
P04003	C4b-binding protein alpha chain OS=Homo sapiens GN=C4BPA PE=1 SV=2 - [C4BPA_HUMAN]	51.09	1	26	485	597	66.9894	7.29834	1.08032	0.655373	0.652413	0.796034	0.93539	1.54084	0.636828	1.03768	0.767125	0.467803
S6BGD6	IgG L chain OS=Homo sapiens PE=1 SV=1 - [S6BGD6_HUMAN]	55.74	1	10	331	235	24.8081	7.23975	0.50011	0.55835	0.452056	0.503505	1.10694	2.27116	0.469929	1.28268	0.392543	0.214227
P0DOX7	Immunoglobulin kappa light chain OS=Homo sapiens PE=1 SV=1 - [IGK_HUMAN]	53.74	1	7	269	214	23.3644	7.1665	0.354317	0.135436	0.236849	0.242201	1.05761	2.82005	0.299179	1.39228	0.17396	0.199645
A0A024QZN4	Vinculin, isoform CRA_c OS=Homo sapiens GN=VCL PE=4 SV=1 - [A0A024QZN4_HUMAN]	74.11	13	73	393	1066	116.649	6.0874	0.889989	1.08963	1.27459	1.08473	1.14211	0.93202	1.18856	1.08756	0.9974	0.984434
Q6GMX4	IGL@ protein OS=Homo sapiens GN=IGL@ PE=2 SV=1 - [Q6GMX4_HUMAN]	50	1	9	328	236	24.7941	6.88818	0.822045	1.18028	0.503207	0.835176	0.86852	1.78535	0.682795	1.11222	0.750908	0.519656
Q6IN99	IGL@ protein OS=Homo sapiens GN=IGL@ PE=2 SV=1 - [Q6IN99_HUMAN]	50.21	1	10	332	235	24.8722	6.7417	0.758819	0.595286	0.861484	0.738529	0.883653	1.75548	0.727585	1.12224	0.658085	0.308379
A0A140VJJ6	Testicular tissue protein Li 70 OS=Homo sapiens PE=2 SV=1 - [A0A140VJJ6_HUMAN]	75.06	3	28	494	437	49.465	6.0874	1.12892	0.852564	0.697864	0.893116	0.965773	1.23415	0.728105	0.976008	0.91507	0.689736
P10909	Clusterin OS=Homo sapiens GN=CLU PE=1 SV=1 - [CLUS_HUMAN]	40.09	20	20	406	449	52.461	6.26514	1.28763	1.10703	1.10914	1.16793	0.941525	0.833714	1.11792	0.964387	1.21106	0.117215
Q5FWF9	IGL@ protein OS=Homo sapiens GN=IGL@ PE=1 SV=1 - [Q5FWF9_HUMAN]	51.29	3	10	319	232	24.7792	5.59229	0.465046	0.36233	0.349811	0.392396	0.834463	2.3467	0.496438	1.22587	0.320096	0.217507
Q6ZVX0	cDNA FLJ41981 fis, clone SMINT2011888, highly similar to Protein Tro alpha1 H,myeloma OS=Homo sapiens PE=2 SV=1 - [Q6ZVX0_HUMAN]	49.49	1	15	352	487	52.841	5.92236	0.602023	0.294243	0.616003	0.50409	0.739203	3.25756	0.341174	1.44598	0.348615	0.363372
Q9NPP6	Immunoglobulin heavy chain variant (Fragment) OS=Homo sapiens PE=2 SV=1 - [Q9NPP6_HUMAN]	54.33	1	14	341	416	44.758	6.12549	0.713587	0.733578	0.775059	0.740741	1.06038	1.74566	0.704614	1.17022	0.632995	0.233177
Q6P089	IGH@ protein OS=Homo sapiens GN=IGH@ PE=2 SV=1 - [Q6P089_HUMAN]	47.08	1	14	339	480	51.9646	6.31592	0.391251	0.227057	0.264984	0.294431	0.902776	2.53884	0.325252	1.25562	0.23449	0.221735
S6BAR0	IgG L chain OS=Homo sapiens PE=2 SV=1 - [S6BAR0_HUMAN]	43.98	2	8	286	216	23.1073	7.69385	0.455255	0.35347	0.302108	0.370278	1.13888	1.82397	0.432188	1.13168	0.327194	0.132782
D3DP16	Fibrinogen gamma chain, isoform CRA_a OS=Homo sapiens GN=FGG PE=4 SV=1 - [D3DP16_HUMAN]	84.73	1	26	454	334	37.7142	6.29053	1.08837	0.866702	0.704498	0.886522	0.938259	1.43351	0.646283	1.00602	0.88122	0.664089
Q7Z379	Uncharacterized protein DKFZp686K04218 (Fragment) OS=Homo sapiens GN=DKFZp686K04218 PE=2 SV=1 - [Q7Z379_HUMAN]	42.47	1	12	303	478	51.5877	6.52197	0.498036	0.485323	0.30631	0.42989	1.1174	2.16624	0.494317	1.25932	0.341367	0.166934
P02649	Apolipoprotein E OS=Homo sapiens GN=APOE PE=1 SV=1 - [APOE_HUMAN]	77.29	11	25	301	317	36.1318	5.73193	1.0748	1.03997	1.2419	1.11889	1.0129	0.945201	1.06022	1.00611	1.1121	0.185869
D9IWP9	Beta-2-glycoprotein I (Fragment) OS=Homo sapiens PE=2 SV=1 - [D9IWP9_HUMAN]	66.26	21	21	509	326	36.2306	8.00146	1.16593	0.882486	1.08724	1.04522	0.959791	0.892358	0.996939	0.949696	1.10058	0.347649
Q5EBM2	Uncharacterized protein OS=Homo sapiens PE=1 SV=1 - [Q5EBM2_HUMAN]	49.13	8	17	316	519	56.7768	6.85889	0.479109	0.342584	0.332742	0.384812	0.992451	3.15117	0.341155	1.49493	0.257412	0.26183
B4E3Q9	cDNA FLJ59659, highly similar to Vinculin OS=Homo sapiens PE=2 SV=1 - [B4E3Q9_HUMAN]	68.39	1	61	316	927	100.875	5.47803	1.04824	1.08316	1.22215	1.11785	1.00896	0.980566	1.04155	1.01036	1.10639	0.12714
P04217	Alpha-1B-glycoprotein OS=Homo sapiens GN=A1BG PE=1 SV=4 - [A1BG_HUMAN]	57.17	16	16	476	495	54.2195	5.85889	1.1287	0.979753	1.02765	1.04537	0.993816	0.954563	0.972917	0.973765	1.07353	0.189439
S6C4R7	IgG L chain OS=Homo sapiens PE=2 SV=1 - [S6C4R7_HUMAN]	41.51	2	7	243	212	22.4992	8.23584	0.679612	0.588609	0.584602	0.617608	0.882794	1.52071	0.580761	0.994754	0.620865	0.247525
P03952	Plasma kallikrein OS=Homo sapiens GN=KLKB1 PE=1 SV=1 - [KLKB1_HUMAN]	52.19	32	32	375	638	71.3228	8.22119	0.954305	0.986854	1.04697	0.996045	1.08115	0.982157	0.948053	1.00379	0.992288	0.880362
A0A024R035	Complement component 9, isoform CRA_a OS=Homo sapiens GN=C9 PE=4 SV=1 - [A0A024R035_HUMAN]	50.27	27	27	357	559	63.1627	5.51611	1.15673	0.966738	1.07355	1.06567	0.898821	0.946503	0.882736	0.909353	1.1719	0.0549579
P25311	Zinc-alpha-2-glycoprotein OS=Homo sapiens GN=AZGP1 PE=1 SV=2 - [ZA2G_HUMAN]	60.74	21	21	423	298	34.2371	6.04932	1.13968	0.866192	1.05925	1.02171	0.976813	0.91296	0.954999	0.948257	1.07746	0.427634
A0M8Q6	Immunoglobulin lambda constant 7 OS=Homo sapiens GN=IGLC7 PE=1 SV=3 - [IGLC7_HUMAN]	65.09	2	6	207	106	11.2466	8.29443	0.42366	0.212634	0.418963	0.351753	0.96229	3.38949	0.278334	1.54337	0.227912	0.276503
P05155	Plasma protease C1 inhibitor OS=Homo sapiens GN=SERPING1 PE=1 SV=2 - [IC1_HUMAN]	31.6	17	17	325	500	55.1194	6.55127	1.10522	0.930254	0.965982	1.00049	0.766121	1.11721	0.901253	0.928193	1.07788	0.564782
Q9P1C5	PRO2769 OS=Homo sapiens PE=2 SV=1 - [Q9P1C5_HUMAN]	26.11	1	9	373	494	55.3328	6.37939	1.00772	1.22062	1.18461	1.13765	0.96076	0.920618	1.07363	0.985002	1.15497	0.129609
Q06033	Inter-alpha-trypsin inhibitor heavy chain H3 OS=Homo sapiens GN=ITIH3 PE=1 SV=2 - [ITIH3_HUMAN]	32.81	29	29	330	890	99.7865	5.74463	1.17058	0.979906	1.04425	1.06491	0.920544	0.95363	0.952781	0.942318	1.1301	0.0981131
B1AKG0	Complement factor H-related protein 1 OS=Homo sapiens GN=CFHR1 PE=1 SV=1 - [B1AKG0_HUMAN]	45.76	1	12	277	271	30.8379	7.81104	1.18755	0.914912	1.26759	1.12335	0.715647	1.0692	0.908663	0.897835	1.25118	0.201724
Q96PD5	N-acetylmuramoyl-L-alanine amidase OS=Homo sapiens GN=PGLYRP2 PE=1 SV=1 - [PGRP2_HUMAN]	40.63	11	13	171	576	62.1779	7.54736	1.24525	1.04047	1.03836	1.10803	0.987527	0.846196	0.994923	0.942882	1.17515	0.120588
P01871	Immunoglobulin heavy constant mu OS=Homo sapiens GN=IGHM PE=1 SV=4 - [IGHM_HUMAN]	64.02	3	24	287	453	49.4086	6.771	0.516515	0.386774	0.411644	0.438311	1.48054	1.58655	0.431688	1.16626	0.375827	0.121036
A0A1U9X8W4	C2 OS=Homo sapiens PE=3 SV=1 - [A0A1U9X8W4_HUMAN]	44.55	6	33	317	752	83.2744	7.41553	1.09674	1.10477	0.874321	1.02528	0.979639	0.868355	0.989098	0.945697	1.08415	0.401564
H7C0N0	Inter-alpha-trypsin inhibitor heavy chain H1 (Fragment) OS=Homo sapiens GN=ITIH1 PE=1 SV=1 - [H7C0N0_HUMAN]	25	1	8	272	464	51.831	6.18896	1.04179	0.952242	1.07169	1.02191	1.01994	0.947975	0.923501	0.963804	1.06029	0.276069
B4DN21	cDNA FLJ53365, highly similar to Homo sapiens fibronectin 1 (FN1), transcript variant 4, mRNA OS=Homo sapiens PE=2 SV=1 - [B4DN21_HUMAN]	62.09	2	14	236	306	34.4778	5.64307	1.11404	1.07502	0.893474	1.02751	0.923252	1.1057	1.00189	1.01028	1.01705	0.851163
P01024	Complement C3 OS=Homo sapiens GN=C3 PE=1 SV=2 - [CO3_HUMAN]	51.47	78	78	309	1663	187.03	6.40479	0.979035	1.03863	0.975993	0.997885	0.968596	1.03506	0.887348	0.963666	1.03551	0.50969
Q53HT9	Complement component 1, r subcomponent variant (Fragment) OS=Homo sapiens PE=2 SV=1 - [Q53HT9_HUMAN]	52.48	27	29	264	705	80.189	6.44287	1.22258	1.02848	0.958625	1.06989	0.94193	0.880818	0.95293	0.925226	1.15636	0.152781
A0A0S2Z3V0	Apolipoprotein E isoform 2 (Fragment) OS=Homo sapiens GN=APOE PE=2 SV=1 - [A0A0S2Z3V0_HUMAN]	81.48	1	15	196	189	21.669	4.7417	1.72506	0.589563	0.707529	1.00739	0.577927	1.3275	1.4521	1.11918	0.900113	0.816898
Q86TT1	Full-length cDNA clone CS0DD006YL02 of Neuroblastoma of Homo sapiens (human) OS=Homo sapiens PE=2 SV=1 - [Q86TT1_HUMAN]	68.8	1	20	245	375	41.2465	6.78564	0.456661	0.493476	0.461573	0.47057	1.48148	1.19189	0.547334	1.07357	0.438324	0.0945061
P51884	Lumican OS=Homo sapiens GN=LUM PE=1 SV=2 - [LUM_HUMAN]	43.2	13	13	234	338	38.4048	6.60986	1.15415	1.06268	0.94316	1.05333	0.941753	0.937336	1.02082	0.966636	1.08969	0.264355
P05543	Thyroxine-binding globulin OS=Homo sapiens GN=SERPINA7 PE=1 SV=2 - [THBG_HUMAN]	50.6	19	19	234	415	46.2946	6.30322	1.22087	1.04215	1.02302	1.09535	0.902269	0.9686	1.01791	0.962927	1.13752	0.137087
P08697	Alpha-2-antiplasmin OS=Homo sapiens GN=SERPINF2 PE=1 SV=3 - [A2AP_HUMAN]	41.55	18	18	220	491	54.5311	6.29053	1.10484	1.00467	1.00323	1.03758	1.02336	0.938873	0.99574	0.98599	1.05232	0.284961
P0DOX2	Immunoglobulin alpha-2 heavy chain OS=Homo sapiens PE=1 SV=1 - [IGA2_HUMAN]	47.91	2	14	245	455	48.9042	6.81494	0.412185	0.351155	0.312005	0.358448	1.12707	2.54967	0.478264	1.385	0.258807	0.168995
P21333	Filamin-A OS=Homo sapiens GN=FLNA PE=1 SV=4 - [FLNA_HUMAN]	43.97	90	90	251	2647	280.564	6.06201	0.861556	0.726579	1.69498	1.09437	0.891273	0.814375	1.25213	0.985926	1.10999	0.759987
H6VRF8	Keratin 1 OS=Homo sapiens GN=KRT1 PE=3 SV=1 - [H6VRF8_HUMAN]	47.52	28	34	214	644	66.013	8.11865	1.22961	1.10701	0.944668	1.09376	0.868307	0.828922	1.17523	0.957487	1.14233	0.376442
Q6N041	Uncharacterized protein DKFZp686O16217 (Fragment) OS=Homo sapiens GN=DKFZp686O16217 PE=2 SV=1 - [Q6N041_HUMAN]	34.74	1	12	247	498	54.0905	7.18115	0.552692	0.26971	0.114754	0.312385	1.1006	1.97478	0.258871	1.11142	0.28107	0.193421
P02647	Apolipoprotein A-I OS=Homo sapiens GN=APOA1 PE=1 SV=1 - [APOA1_HUMAN]	65.17	19	19	251	267	30.7589	5.75732	0.579898	0.351674	0.346651	0.426074	1.33685	4.14641	0.442463	1.97524	0.215708	0.238282
P0DOX6	Immunoglobulin mu heavy chain OS=Homo sapiens PE=1 SV=1 - [IGM_HUMAN]	39.76	1	19	199	576	63.4462	7.86963	0.577127	0.594395	0.359339	0.510287	1.14767	2.54651	0.510207	1.40146	0.36411	0.215424
P68871	Hemoglobin subunit beta OS=Homo sapiens GN=HBB PE=1 SV=2 - [HBB_HUMAN]	82.99	1	11	162	147	15.9883	7.28369	0.285278	0.184707	0.234515	0.234833	1.26837	1.93483	0.253102	1.1521	0.203831	0.134407
P01009	Alpha-1-antitrypsin OS=Homo sapiens GN=SERPINA1 PE=1 SV=3 - [A1AT_HUMAN]	62.2	28	28	278	418	46.707	5.59229	0.902467	0.343241	0.568105	0.604604	0.729979	5.28674	0.401634	2.13945	0.282598	0.38766
Q6GMX6	IGH@ protein OS=Homo sapiens GN=IGH@ PE=1 SV=1 - [Q6GMX6_HUMAN]	37.42	2	15	181	465	51.0507	8.68994	0.477509	0.284925	0.298734	0.353723	1.06974	2.89198	0.34096	1.43423	0.24663	0.228753
P27169	Serum paraoxonase/arylesterase 1 OS=Homo sapiens GN=PON1 PE=1 SV=3 - [PON1_HUMAN]	47.32	12	14	173	355	39.7062	5.22412	1.26634	1.16132	1.03368	1.15378	1.11123	0.811001	1.1101	1.01078	1.14148	0.300735
V9HW68	Epididymis luminal protein 214 OS=Homo sapiens GN=HEL-214 PE=2 SV=1 - [V9HW68_HUMAN]	34.04	1	14	178	470	51.6828	7.75244	0.705874	0.552418	0.75874	0.672344	1.0691	1.86821	0.609943	1.18242	0.568618	0.243055
P12814	Alpha-actinin-1 OS=Homo sapiens GN=ACTN1 PE=1 SV=2 - [ACTN1_HUMAN]	61.88	34	50	218	892	102.993	5.41455	0.884531	1.00002	1.24952	1.04469	1.09149	0.956009	1.25228	1.09993	0.949779	0.708604
P22792	Carboxypeptidase N subunit 2 OS=Homo sapiens GN=CPN2 PE=1 SV=3 - [CPN2_HUMAN]	36.51	15	15	219	545	60.5181	5.98584	1.15045	0.98991	1.06273	1.0677	0.957558	0.933128	0.935127	0.941938	1.13351	0.0556948
Q6PIK1	IGL@ protein OS=Homo sapiens GN=IGL@ PE=1 SV=1 - [Q6PIK1_HUMAN]	50.21	1	10	191	235	24.8421	7.7085	0.449505	0.346155	0.280291	0.35865	1.08207	2.09514	0.352238	1.17648	0.30485	0.182525
O75882	Attractin OS=Homo sapiens GN=ATRN PE=1 SV=2 - [ATRN_HUMAN]	23.51	1	34	212	1429	158.432	7.31299	1.03475	1.12851	0.930515	1.03126	0.996961	0.960174	0.942782	0.966639	1.06685	0.337611
Q6GMW4	IGL@ protein OS=Homo sapiens GN=IGL@ PE=2 SV=1 - [Q6GMW4_HUMAN]	47.64	1	9	188	233	24.8393	6.7417	0.655906	0.675944	0.979479	0.770443	1.09118	1.93971	0.795275	1.27539	0.604085	0.231855
B4DZ36	cDNA FLJ58441, highly similar to Attractin OS=Homo sapiens PE=2 SV=1 - [B4DZ36_HUMAN]	28.37	1	34	210	1156	129.748	6.87354	1.04954	1.02411	1.17641	1.08335	0.957609	1.00361	1.09061	1.01728	1.06496	0.340687
Q68CK4	Leucine-rich alpha-2-glycoprotein OS=Homo sapiens GN=HMFT1766 PE=2 SV=1 - [Q68CK4_HUMAN]	42.07	1	12	188	347	38.1441	6.94678	1.11546	1.46533	0.301842	0.960878	0.724962	0.954817	0.726919	0.802233	1.19775	0.676399
Q5CZ94	Uncharacterized protein DKFZp781M0386 OS=Homo sapiens GN=DKFZp781M0386 PE=2 SV=1 - [Q5CZ94_HUMAN]	44.02	1	8	178	234	24.9863	7.26904	0.537092	0.439152	0.399203	0.458483	1.17049	1.9335	0.471462	1.19182	0.384692	0.158894
Q6MZQ6	Uncharacterized protein DKFZp686G11190 OS=Homo sapiens GN=DKFZp686G11190 PE=2 SV=1 - [Q6MZQ6_HUMAN]	30.32	1	12	161	475	52.01	8.06006	0.449793	0.3464	0.489546	0.428579	1.1294	2.4991	0.474213	1.36757	0.313387	0.191491
P02775	Platelet basic protein OS=Homo sapiens GN=PPBP PE=1 SV=3 - [CXCL7_HUMAN]	51.56	9	9	230	128	13.8854	8.79248	0.809876	1.1214	1.37855	1.10327	1.15018	0.961932	1.1392	1.08377	1.018	0.916802
Q6N095	Uncharacterized protein OS=Homo sapiens GN=DKFZp686K03196 PE=1 SV=1 - [Q6N095_HUMAN]	27.58	1	11	159	475	52.3271	8.57275	0.356083	0.243959	0.228252	0.276098	1.05793	2.73015	0.274375	1.35415	0.20389	0.211404
P02743	Serum amyloid P-component OS=Homo sapiens GN=APCS PE=1 SV=2 - [SAMP_HUMAN]	31.84	7	7	168	223	25.3711	6.53662	1.05064	0.956974	1.0941	1.0339	0.994056	0.871776	0.899963	0.921932	1.12146	0.110554
Q6N089	Uncharacterized protein OS=Homo sapiens GN=DKFZp686P15220 PE=1 SV=1 - [Q6N089_HUMAN]	30.51	1	12	161	472	51.6918	7.92822	0.666646	0.544442	0.494108	0.568399	0.969156	2.46046	0.522331	1.31732	0.431483	0.271884
Q6N094	Uncharacterized protein DKFZp686O01196 OS=Homo sapiens GN=DKFZp686O01196 PE=2 SV=1 - [Q6N094_HUMAN]	30	1	12	158	480	52.5794	8.17725	0.734361	0.529431	0.509208	0.591	0.790052	2.27679	0.61038	1.22574	0.482157	0.299501
P0DOX5	Immunoglobulin gamma-1 heavy chain OS=Homo sapiens PE=1 SV=1 - [IGG1_HUMAN]	29.84	1	11	157	449	49.2992	8.71924	0.624391	0.582225	0.411377	0.539331	1.04155	2.07113	0.506608	1.20643	0.447047	0.223643
P35908	Keratin, type II cytoskeletal 2 epidermal OS=Homo sapiens GN=KRT2 PE=1 SV=2 - [K22E_HUMAN]	52.11	25	33	157	639	65.3932	8.00146	1.37659	1.57757	0.84886	1.26767	0.756781	0.715212	1.02581	0.832602	1.52254	0.141683
B0AZL7	cDNA, FLJ79457, highly similar to Insulin-like growth factor-binding proteincomplex acid labile chain OS=Homo sapiens PE=2 SV=1 - [B0AZL7_HUMAN]	45.79	22	22	149	605	65.9598	6.78564	1.00419	1.0195	0.998157	1.00728	0.995046	0.976172	0.950738	0.973985	1.03419	0.0807101
P02750	Leucine-rich alpha-2-glycoprotein OS=Homo sapiens GN=LRG1 PE=1 SV=2 - [A2GL_HUMAN]	42.07	1	12	185	347	38.1541	6.94678	1.60751	0.648252	0.760128	1.0053	0.951146	0.928155	0.717757	0.865686	1.16127	0.677513
A8K3K1	cDNA FLJ78096, highly similar to Homo sapiens actin, alpha, cardiac muscle (ACTC), mRNA OS=Homo sapiens PE=2 SV=1 - [A8K3K1_HUMAN]	37.67	1	12	222	377	42.0199	5.38916	0.899909	1.07245	1.17423	1.04886	1.13548	0.955659	1.15309	1.08141	0.969899	0.765434
P23142	Fibulin-1 OS=Homo sapiens GN=FBLN1 PE=1 SV=4 - [FBLN1_HUMAN]	39.26	6	20	146	703	77.1624	5.22412	1.35462	1.10542	1.09894	1.18633	0.798483	0.850385	1.04613	0.898334	1.32058	0.0634062
P13645	Keratin, type I cytoskeletal 10 OS=Homo sapiens GN=KRT10 PE=1 SV=6 - [K1C10_HUMAN]	52.91	26	29	161	584	58.7917	5.21143	1.35557	1.44149	0.822917	1.20666	0.793655	0.735898	1.07033	0.866627	1.39237	0.195909
B2R6V9	cDNA, FLJ93141, highly similar to Homo sapiens coagulation factor XIII, A1 polypeptide (F13A1), mRNA OS=Homo sapiens PE=2 SV=1 - [B2R6V9_HUMAN]	36.34	24	24	157	732	83.1886	5.99854	0.966804	1.01654	0.963169	0.98217	1.14043	0.907682	0.993671	1.01393	0.968679	0.673987
P12259	Coagulation factor V OS=Homo sapiens GN=F5 PE=1 SV=4 - [FA5_HUMAN]	28.24	50	58	215	2224	251.546	6.04932	1.26277	1.01718	1.039	1.10632	0.953342	0.963193	0.964033	0.960189	1.15218	0.13637
B2R9F2	cDNA, FLJ94361, highly similar to Homo sapiens serine (or cysteine) proteinase inhibitor, clade A(alpha-1 antiproteinase, antitrypsin), member 6 (SERPINA6), mRNA OS=Homo sapiens PE=2 SV=1 - [B2R9F2_HUMAN]	31.6	10	10	178	405	45.0659	6.03662	1.01803	0.972353	0.881042	0.957142	1.05443	1.1259	0.905943	1.02876	0.930386	0.40094
A0A1B1CYC9	Vitamin D binding protein (Fragment) OS=Homo sapiens GN=Gc PE=4 SV=1 - [A0A1B1CYC9_HUMAN]	65.63	7	7	151	32	3.49682	9.11475	0.839353	1.20465	0.798635	0.947545	1.14557	1.16043	1.15755	1.15452	0.820729	0.184339
B3VL17	Beta globin (Fragment) OS=Homo sapiens PE=3 SV=1 - [B3VL17_HUMAN]	93.33	1	10	122	105	11.4748	6.3667	0.712441	0.549699	0.679717	0.647286	1.15351	1.65053	0.624725	1.14292	0.566344	0.174207
B2R815	cDNA, FLJ93695, highly similar to Homo sapiens serpin peptidase inhibitor, clade A (alpha-1 antiproteinase, antitrypsin), member 4 (SERPINA4), mRNA OS=Homo sapiens PE=2 SV=1 - [B2R815_HUMAN]	55.27	21	21	174	427	48.4951	7.75244	1.14574	1.02011	0.999379	1.05508	0.932653	0.884348	0.973276	0.930092	1.13438	0.0757657
A8K1K1	cDNA FLJ76342, highly similar to Homo sapiens carnosine dipeptidase 1 (metallopeptidase M20 family)(CNDP1), mRNA OS=Homo sapiens PE=2 SV=1 - [A8K1K1_HUMAN]	48.52	19	19	141	507	56.6982	5.36377	0.897529	1.12986	0.999459	1.00895	1.0259	0.918616	0.984731	0.976414	1.03332	0.683457
P35527	Keratin, type I cytoskeletal 9 OS=Homo sapiens GN=KRT9 PE=1 SV=3 - [K1C9_HUMAN]	45.43	23	24	142	623	62.0268	5.23682	1.19678	0.952376	0.986356	1.04517	0.956911	0.867594	1.2364	1.0203	1.02438	0.862635
P05160	Coagulation factor XIII B chain OS=Homo sapiens GN=F13B PE=1 SV=3 - [F13B_HUMAN]	56.28	29	29	164	661	75.4612	6.39209	1.02474	1.00702	0.916913	0.98289	1.00388	0.99033	0.919161	0.971124	1.01212	0.795542
Q13707	ACTA2 protein (Fragment) OS=Homo sapiens GN=ACTA2 PE=3 SV=1 - [Q13707_HUMAN]	35.45	1	9	197	330	36.7832	5.35107	1.05194	1.11338	0.910438	1.02525	1.05148	1.02178	1.04146	1.03824	0.987492	0.841094
B4DUV1	Fibulin-1 OS=Homo sapiens PE=2 SV=1 - [B4DUV1_HUMAN]	37.13	1	17	121	641	70.1077	5.26221	0.890226	1.09121	0.700252	0.893897	1.04058	1.08341	0.940262	1.02142	0.875154	0.349908
L8E853	von Willebrand factor OS=Homo sapiens GN=VWF PE=4 SV=1 - [L8E853_HUMAN]	28.99	1	67	183	2715	298.181	5.47803	1.0921	0.650186	0.443778	0.728688	1.0533	1.28501	1.11226	1.15019	0.633538	0.107045
P04275	von Willebrand factor OS=Homo sapiens GN=VWF PE=1 SV=4 - [VWF_HUMAN]	28.65	2	68	183	2813	309.058	5.47803	0.823999	0.661594	1.43005	0.971882	0.95136	1.33387	0.536227	0.940487	1.03338	0.928397
B1AHL2	Fibulin-1 OS=Homo sapiens GN=FBLN1 PE=1 SV=1 - [B1AHL2_HUMAN]	29.96	1	16	119	721	78.2769	5.38916	1.07347	1.23696	0.746217	1.01888	0.880882	0.908799	1.11988	0.969853	1.05055	0.778303
B2R582	cDNA, FLJ92374, highly similar to Homo sapiens C-type lectin domain family 3, member B (CLEC3B), mRNA OS=Homo sapiens PE=2 SV=1 - [B2R582_HUMAN]	69.8	1	11	126	202	22.5223	6.03662	1.05519	0.898031	0.881791	0.945004	0.965829	0.90945	0.959592	0.944957	1.00005	0.999388
P07225	Vitamin K-dependent protein S OS=Homo sapiens GN=PROS1 PE=1 SV=1 - [PROS_HUMAN]	40.09	1	23	202	676	75.0739	5.66846	0.977215	0.901767	0.961882	0.946955	0.976236	1.16669	0.876651	1.00653	0.940816	0.536212
Q16610	Extracellular matrix protein 1 OS=Homo sapiens GN=ECM1 PE=1 SV=2 - [ECM1_HUMAN]	58.89	25	25	179	540	60.6353	6.7124	1.12693	1.04232	0.911552	1.02694	0.970683	0.99606	1.00754	0.991428	1.03581	0.606359
P05452	Tetranectin OS=Homo sapiens GN=CLEC3B PE=1 SV=3 - [TETN_HUMAN]	72.77	2	12	117	202	22.5223	5.66846	1.17889	1.28585	1.14194	1.20222	1.2523	0.82564	1.2826	1.12018	1.07324	0.621799
Q4TZM4	Hemoglobin beta chain (Fragment) OS=Homo sapiens GN=HBB PE=3 SV=1 - [Q4TZM4_HUMAN]	89.11	1	7	93	101	11.0156	6.52197	0.409861	0.314185	0.148654	0.2909	1.18884	1.65749	0.349585	1.06531	0.273068	0.118113
P63104	14-3-3 protein zeta/delta OS=Homo sapiens GN=YWHAZ PE=1 SV=1 - [1433Z_HUMAN]	75.51	13	19	134	245	27.7277	4.79248	0.968922	1.05165	1.25235	1.09098	1.12397	0.950092	1.20782	1.09396	0.997274	0.980263
Q16519	Protein S (Fragment) OS=Homo sapiens GN=PROS1 PE=4 SV=1 - [Q16519_HUMAN]	41.69	1	23	189	650	72.4155	5.73193	0.875038	0.941053	0.884672	0.900254	0.98242	1.1761	0.829026	0.995848	0.904008	0.403833
Q6MZU6	Uncharacterized protein DKFZp686C15213 OS=Homo sapiens GN=DKFZp686C15213 PE=2 SV=1 - [Q6MZU6_HUMAN]	18.1	2	8	120	464	51.0662	7.7085	0.68042	0.612955	0.484581	0.592652	1.01271	2.07531	0.513793	1.20061	0.493627	0.260309
P00742	Coagulation factor X OS=Homo sapiens GN=F10 PE=1 SV=2 - [FA10_HUMAN]	33.2	16	17	125	488	54.6965	5.93506	1.01924	1.01689	1.08391	1.04001	0.978308	0.931253	1.02394	0.977833	1.06359	0.146849
C9JVG0	Serotransferrin (Fragment) OS=Homo sapiens GN=TF PE=1 SV=1 - [C9JVG0_HUMAN]	56.72	1	9	129	134	14.681	7.13721	0.61376	1.27312	1.4641	1.11699	1.19139	2.24284	0.872236	1.43549	0.778125	0.549302
P80108	Phosphatidylinositol-glycan-specific phospholipase D OS=Homo sapiens GN=GPLD1 PE=1 SV=3 - [PHLD_HUMAN]	36.07	23	23	110	840	92.278	6.3667	1.05013	1.05222	0.988957	1.03044	1.08061	0.883473	0.960745	0.974943	1.05692	0.414327
P67936	Tropomyosin alpha-4 chain OS=Homo sapiens GN=TPM4 PE=1 SV=3 - [TPM4_HUMAN]	62.5	7	22	148	248	28.5045	4.69092	0.943848	0.999597	1.36172	1.10172	1.0673	0.965321	1.18573	1.07278	1.02698	0.852197
P03951	Coagulation factor XI OS=Homo sapiens GN=F11 PE=1 SV=1 - [FA11_HUMAN]	48.48	27	27	129	625	70.0636	8.104	1.04016	0.989752	1.10437	1.04476	0.977074	0.971766	0.971993	0.973611	1.07308	0.0988466
P37802	Transgelin-2 OS=Homo sapiens GN=TAGLN2 PE=1 SV=3 - [TAGL2_HUMAN]	83.42	13	13	75	199	22.3772	8.25049	0.888272	1.00563	1.28435	1.05942	1.08678	0.97747	1.13047	1.06491	0.994842	0.96731
D6RE86	Ceruloplasmin (Fragment) OS=Homo sapiens GN=CP PE=1 SV=8 - [D6RE86_HUMAN]	40.45	1	6	150	178	20.7486	7.23975	0.949793	0.988064	1.01429	0.984049	0.972834	0.989665	0.947171	0.96989	1.0146	0.562237
F2RM37	Coagulation factor IX OS=Homo sapiens GN=F9 p22 PE=2 SV=1 - [F2RM37_HUMAN]	40.13	14	15	91	461	51.711	5.46533	1.0642	0.976808	1.08389	1.04163	0.98844	0.915921	0.928015	0.944125	1.10328	0.0705647
P02652	Apolipoprotein A-II OS=Homo sapiens GN=APOA2 PE=1 SV=1 - [APOA2_HUMAN]	64	7	7	100	100	11.1679	6.62451	0.727163	0.696152	0.652505	0.69194	1.44941	2.34853	0.666075	1.488	0.465012	0.17715
P07737	Profilin-1 OS=Homo sapiens GN=PFN1 PE=1 SV=2 - [PROF1_HUMAN]	77.14	8	8	105	140	15.0446	8.26514	0.921417	1.0183	1.31618	1.0853	1.11793	0.906836	1.13872	1.05449	1.02921	0.836595
O43866	CD5 antigen-like OS=Homo sapiens GN=CD5L PE=1 SV=1 - [CD5L_HUMAN]	58.79	19	19	104	347	38.0629	5.46533	0.753207	0.674537	0.589649	0.672464	1.31312	1.27621	0.663562	1.0843	0.620184	0.12907
Q14520	Hyaluronan-binding protein 2 OS=Homo sapiens GN=HABP2 PE=1 SV=1 - [HABP2_HUMAN]	26.07	15	15	173	560	62.6304	6.53662	1.02451	0.946229	1.10176	1.02417	1.0197	0.930961	0.924427	0.958364	1.06866	0.293088
P48740	Mannan-binding lectin serine protease 1 OS=Homo sapiens GN=MASP1 PE=1 SV=3 - [MASP1_HUMAN]	34.05	18	19	105	699	79.1952	5.49072	1.21531	1.02307	1.0499	1.09609	0.944558	0.901979	0.94257	0.929703	1.17897	0.0542469
K7ER74	APOC4-APOC2 readthrough (NMD candidate) OS=Homo sapiens GN=APOC4-APOC2 PE=1 SV=1 - [K7ER74_HUMAN]	33.15	4	5	78	178	20.0363	6.63916	0.612157	0.814165	0.940499	0.78894	1.86307	0.90191	1.17868	1.31455	0.600159	0.155953
Q86UX7	Fermitin family homolog 3 OS=Homo sapiens GN=FERMT3 PE=1 SV=1 - [URP2_HUMAN]	49.48	27	27	113	667	75.905	6.97607	0.988001	1.04998	1.25888	1.09895	1.06938	0.899854	1.21235	1.06053	1.03623	0.768437
E1B4S9	Apolipoprotein B (Fragment) OS=Homo sapiens GN=APOB PE=4 SV=1 - [E1B4S9_HUMAN]	50.9	1	11	140	222	26.3018	5.61768	0.856901	1.1565	0.771322	0.928241	1.09107	1.1149	1.07098	1.09231	0.849793	0.23498
V9GYE7	Complement factor H-related protein 2 OS=Homo sapiens GN=CFHR2 PE=1 SV=1 - [V9GYE7_HUMAN]	46.85	5	10	117	254	28.8929	6.81494	0.96319	1.11374	0.836865	0.971265	0.854728	0.962018	1.0716	0.962781	1.00881	0.937469
Q562R1	Beta-actin-like protein 2 OS=Homo sapiens GN=ACTBL2 PE=1 SV=2 - [ACTBL_HUMAN]	16.76	1	5	113	376	41.976	5.59229	1.00648	1.03416	1.12603	1.05556	1.02211	0.944754	1.11204	1.0263	1.02851	0.653177
P07195	L-lactate dehydrogenase B chain OS=Homo sapiens GN=LDHB PE=1 SV=2 - [LDHB_HUMAN]	44.61	12	13	70	334	36.6151	6.04932	0.972819	1.06748	1.05223	1.03084	1.20171	0.814485	1.13444	1.05021	0.981556	0.882498
P07996	Thrombospondin-1 OS=Homo sapiens GN=THBS1 PE=1 SV=2 - [TSP1_HUMAN]	35.38	1	36	102	1170	129.3	4.94482	0.526182	1.20427	1.75372	1.16139	1.28938	0.67822	0.736081	0.901227	1.28868	0.555537
A0A024R9Q1	Thrombospondin 1, isoform CRA_a OS=Homo sapiens GN=THBS1 PE=4 SV=1 - [A0A024R9Q1_HUMAN]	35.38	1	36	101	1170	129.27	4.94482	0.651154	2.29381	0.707497	1.21749	0.754172	0.89906	1.32336	0.992198	1.22706	0.710378
P02042	Hemoglobin subunit delta OS=Homo sapiens GN=HBD PE=1 SV=2 - [HBD_HUMAN]	74.15	4	10	66	147	16.0453	8.04541	0.473614	0.430958	0.400246	0.434939	1.22213	1.75065	0.467733	1.14684	0.379251	0.128853
Q9UK55	Protein Z-dependent protease inhibitor OS=Homo sapiens GN=SERPINA10 PE=1 SV=1 - [ZPI_HUMAN]	44.37	2	17	81	444	50.6742	8.26514	1.18362	0.926039	0.786203	0.965287	0.994763	0.969739	0.784539	0.916347	1.05341	0.733338
B2RBZ5	cDNA, FLJ95778, highly similar to Homo sapiens serpin peptidase inhibitor, clade A (alpha-1 antiproteinase, antitrypsin), member 10 (SERPINA10), mRNA OS=Homo sapiens PE=2 SV=1 - [B2RBZ5_HUMAN]	42.12	1	16	80	444	50.6422	8.51416	1.22081	1.06006	0.581649	0.954172	0.998738	0.959013	0.97694	0.97823	0.975407	0.906475
Q9Y4G6	Talin-2 OS=Homo sapiens GN=TLN2 PE=1 SV=4 - [TLN2_HUMAN]	8.14	2	23	83	2542	271.443	5.56689	0.990536	1.08257	1.35645	1.14318	0.944546	0.88555	1.14053	0.99021	1.15449	0.318025
P05154	Plasma serine protease inhibitor OS=Homo sapiens GN=SERPINA5 PE=1 SV=3 - [IPSP_HUMAN]	33.25	14	14	95	406	45.6457	9.26123	1.32131	1.17438	1.08804	1.19458	0.434623	1.00194	1.07075	0.835773	1.42931	0.166971
D6R934	Complement C1q subcomponent subunit B OS=Homo sapiens GN=C1QB PE=1 SV=1 - [D6R934_HUMAN]	30.68	7	7	69	251	26.4424	8.63135	0.876268	1.09703	0.577565	0.850289	1.04692	0.829477	0.915975	0.93079	0.913513	0.647779
A0A0R7FJH5	Coagulation factor XII OS=Homo sapiens GN=F12 PE=3 SV=1 - [A0A0R7FJH5_HUMAN]	44.55	1	25	136	615	67.8169	7.79639	0.946172	0.809083	1.1982	0.984484	1.15263	0.74702	1.05469	0.984779	0.9997	0.998676
A0A024CIM4	Carboxylic ester hydrolase OS=Homo sapiens PE=3 SV=1 - [A0A024CIM4_HUMAN]	27.74	17	17	86	602	68.3902	7.21045	1.00107	1.17049	0.983868	1.05181	0.945961	1.00857	1.06679	1.00711	1.04438	0.552498
P02747	Complement C1q subcomponent subunit C OS=Homo sapiens GN=C1QC PE=1 SV=3 - [C1QC_HUMAN]	25.31	5	5	48	245	25.7571	8.41162	0.823922	1.12153	0.452724	0.799392	1.10299	0.66095	0.899784	0.88791	0.900307	0.722008
P43251	Biotinidase OS=Homo sapiens GN=BTD PE=1 SV=2 - [BTD_HUMAN]	23.39	10	10	62	543	61.0933	6.25244	1.05685	1.12764	0.927576	1.03736	1.06037	0.899437	0.97488	0.97823	1.06044	0.473359
P05090	Apolipoprotein D OS=Homo sapiens GN=APOD PE=1 SV=1 - [APOD_HUMAN]	33.33	7	7	71	189	21.2618	5.14795	0.990145	0.83978	0.824034	0.884653	1.20505	1.27481	0.932663	1.13751	0.777712	0.0968462
P04075	Fructose-bisphosphate aldolase A OS=Homo sapiens GN=ALDOA PE=1 SV=2 - [ALDOA_HUMAN]	50.82	15	20	85	364	39.3953	8.08936	0.963882	0.999648	1.38956	1.1177	1.08613	0.92663	1.12051	1.04442	1.07016	0.648292
O43707	Alpha-actinin-4 OS=Homo sapiens GN=ACTN4 PE=1 SV=2 - [ACTN4_HUMAN]	28.54	9	25	89	911	104.788	5.43994	0.913957	1.02647	1.32108	1.08717	1.06774	1.0062	1.18659	1.08685	1.0003	0.998157
Q9Y6R7	IgGFc-binding protein OS=Homo sapiens GN=FCGBP PE=1 SV=3 - [FCGBP_HUMAN]	12.12	38	38	90	5405	571.639	5.33838	1.17525	1.04848	0.914304	1.04601	0.868602	0.959934	0.945773	0.92477	1.1311	0.206536
P02656	Apolipoprotein C-III OS=Homo sapiens GN=APOC3 PE=1 SV=1 - [APOC3_HUMAN]	46.46	3	3	36	99	10.8455	5.41455	0.5984	0.85198	0.82847	0.759617	1.81853	1.13967	1.14775	1.36865	0.555012	0.0634613
A0A1S5UZ39	Hemoglobin subunit alpha OS=Homo sapiens GN=HBA2 PE=2 SV=1 - [A0A1S5UZ39_HUMAN]	73.8	7	9	75	187	20.1333	8.89502	0.337662	0.220696	0.250808	0.269722	1.27793	1.98844	0.287972	1.18478	0.227656	0.137814
B2RA39	cDNA, FLJ94686, highly similar to Homo sapiens complement factor H-related 5 (CFHL5), mRNA OS=Homo sapiens PE=2 SV=1 - [B2RA39_HUMAN]	24.78	14	15	78	569	64.349	7.06396	1.01329	1.07676	1.13524	1.07509	0.831692	0.983633	1.00055	0.938624	1.14539	0.100717
P23528	Cofilin-1 OS=Homo sapiens GN=CFL1 PE=1 SV=3 - [COF1_HUMAN]	78.31	14	15	75	166	18.4907	8.08936	0.928712	0.994817	1.33222	1.08525	1.11456	0.900705	1.21598	1.07708	1.00758	0.960674
P13796	Plastin-2 OS=Homo sapiens GN=LCP1 PE=1 SV=6 - [PLSL_HUMAN]	47.69	20	25	77	627	70.2439	5.42725	1.12217	1.04268	0.947489	1.03745	0.979446	0.953802	0.986357	0.973202	1.06602	0.279912
S6AWF4	IgG L chain OS=Homo sapiens PE=2 SV=1 - [S6AWF4_HUMAN]	32.78	1	5	43	180	19.83	7.09326	0.848693	0.726902	0.84725	0.807615	0.852388	1.63471	0.853406	1.1135	0.725294	0.310595
Q04756	Hepatocyte growth factor activator OS=Homo sapiens GN=HGFAC PE=1 SV=1 - [HGFA_HUMAN]	26.56	16	16	94	655	70.6361	7.23975	1.00746	1.0984	1.10596	1.07061	0.979935	0.899678	1.01964	0.966418	1.10781	0.0928372
M0R2W8	N-acetylmuramoyl-L-alanine amidase (Fragment) OS=Homo sapiens GN=PGLYRP2 PE=1 SV=2 - [M0R2W8_HUMAN]	30.94	1	3	35	181	19.5322	6.66846	1.33213	1.00292	0.990223	1.10842	0.926522	0.823708	0.841418	0.863883	1.28307	0.103398
P11021	78 kDa glucose-regulated protein OS=Homo sapiens GN=HSPA5 PE=1 SV=2 - [GRP78_HUMAN]	46.18	23	26	83	654	72.2884	5.16064	1.01805	1.08685	1.16912	1.09134	1.03967	0.933674	1.12053	1.03129	1.05823	0.436473
P11226	Mannose-binding protein C OS=Homo sapiens GN=MBL2 PE=1 SV=2 - [MBL2_HUMAN]	43.15	9	9	62	248	26.127	5.49072	1.23957	1.10872	0.872548	1.07361	0.868669	0.949413	0.913114	0.910399	1.17928	0.211702
Q9NZP8	Complement C1r subcomponent-like protein OS=Homo sapiens GN=C1RL PE=1 SV=2 - [C1RL_HUMAN]	29.77	2	13	79	487	53.4643	7.1958	1.20083	1.06629	0.876619	1.04791	0.897542	0.86421	0.969002	0.910251	1.15124	0.236707
K7ENT6	Tropomyosin alpha-4 chain (Fragment) OS=Homo sapiens GN=TPM4 PE=1 SV=1 - [K7ENT6_HUMAN]	69.27	1	15	93	179	20.6084	4.61475	1.00462	0.979705	1.48503	1.15645	1.08437	0.947731	1.29266	1.10825	1.04349	0.814721
Q6U2L6	C4B (Fragment) OS=Homo sapiens GN=C4B PE=4 SV=1 - [Q6U2L6_HUMAN]	76	1	6	96	100	10.2462	6.52197	1.1726	0.80163	1.2699	1.08138	1.05961	0.830036	1.03746	0.9757	1.10831	0.545781
S6BGD4	IgG H chain OS=Homo sapiens PE=2 SV=1 - [S6BGD4_HUMAN]	17.09	1	3	31	234	24.9997	9.48096	0.635219	0.422355	0.342941	0.466838	0.867532	2.37105	0.433146	1.22391	0.381432	0.271184
P14618	Pyruvate kinase PKM OS=Homo sapiens GN=PKM PE=1 SV=4 - [KPYM_HUMAN]	59.32	26	26	69	531	57.9	7.84033	0.981091	1.11279	1.31073	1.13487	1.03067	0.892935	1.12681	1.01681	1.11611	0.37148
A0A0U1RR20	Proteoglycan 4 OS=Homo sapiens GN=PRG4 PE=1 SV=1 - [A0A0U1RR20_HUMAN]	19.25	27	27	127	1361	146.361	9.46631	1.09183	1.00923	1.17526	1.09211	0.99587	0.913234	0.923122	0.944075	1.1568	0.0533445
P08567	Pleckstrin OS=Homo sapiens GN=PLEK PE=1 SV=3 - [PLEK_HUMAN]	39.14	10	10	60	350	40.0994	8.27979	0.859564	1.04496	1.26043	1.05499	1.13542	0.986083	1.17175	1.09775	0.961042	0.756915
P0CG39	POTE ankyrin domain family member J OS=Homo sapiens GN=POTEJ PE=3 SV=1 - [POTEJ_HUMAN]	6.07	1	5	42	1038	117.315	5.97314	0.812085	0.959178	0.98514	0.918801	1.0979	0.948826	1.221	1.08924	0.843523	0.148437
Q6FHW3	DF protein OS=Homo sapiens GN=DF PE=2 SV=1 - [Q6FHW3_HUMAN]	58.33	9	9	41	228	24.4074	7.23975	1.08327	0.869591	0.800612	0.917825	0.940549	1.01033	0.943739	0.964873	0.951239	0.621526
P62258	14-3-3 protein epsilon OS=Homo sapiens GN=YWHAE PE=1 SV=1 - [1433E_HUMAN]	46.27	8	11	50	255	29.1554	4.7417	1.02212	1.05759	1.18807	1.08926	1.11446	0.938422	1.14441	1.06576	1.02205	0.787889
P00748	Coagulation factor XII OS=Homo sapiens GN=F12 PE=1 SV=3 - [FA12_HUMAN]	44.55	1	25	124	615	67.7479	7.73779	1.66226	0.921094	0.596541	1.05996	0.651275	1.18132	1.36177	1.06479	0.995471	0.990499
I3L145	Sex hormone-binding globulin OS=Homo sapiens GN=SHBG PE=1 SV=1 - [I3L145_HUMAN]	55.52	14	14	71	344	37.4643	6.22705	1.56186	0.79006	1.0299	1.12727	1.00498	0.806116	0.951003	0.920699	1.22436	0.430207
Q9H804	cDNA FLJ14022 fis, clone HEMBA1003538, weakly similar to COMPLEMENT C1R COMPONENT (EC 3.4.21.41) OS=Homo sapiens PE=2 SV=1 - [Q9H804_HUMAN]	26.71	1	11	69	438	47.9638	7.45947	1.19433	1.23095	0.281718	0.902333	1.00731	0.707437	0.963212	0.892653	1.01084	0.977615
B2R888	Monocyte differentiation antigen CD14 OS=Homo sapiens PE=2 SV=1 - [B2R888_HUMAN]	36.27	11	11	51	375	40.0227	6.22705	1.17246	1.00703	1.06312	1.08087	0.960327	0.922961	0.955005	0.946098	1.14245	0.0542188
B4E1C4	cDNA FLJ51179, highly similar to Vitamin K-dependent protein C (EC 3.4.21.69) OS=Homo sapiens PE=2 SV=1 - [B4E1C4_HUMAN]	32.07	11	11	52	421	46.0296	7.92822	1.1365	1.05989	1.08283	1.09307	0.993735	0.91147	1.05715	0.987452	1.10696	0.0921044
S6B2A6	IgG H chain OS=Homo sapiens PE=2 SV=1 - [S6B2A6_HUMAN]	16.67	1	5	41	300	32.1469	7.25439	0.955868	0.866042	0.952241	0.924717	0.894562	1.07789	0.844582	0.939011	0.984778	0.861338
P00915	Carbonic anhydrase 1 OS=Homo sapiens GN=CA1 PE=1 SV=2 - [CAH1_HUMAN]	59.39	5	12	73	261	28.8524	7.12256	1.02832	0.974235	0.864944	0.955832	1.0772	0.942924	0.812862	0.944329	1.01218	0.904656
A8K2W3	cDNA FLJ78516 OS=Homo sapiens PE=2 SV=1 - [A8K2W3_HUMAN]	39.76	16	16	60	425	47.0726	5.24951	0.996633	1.05031	1.3177	1.12155	1.10453	0.92291	1.24826	1.0919	1.02715	0.839048
Q9UL78	Myosin-reactive immunoglobulin light chain variable region (Fragment) OS=Homo sapiens PE=1 SV=1 - [Q9UL78_HUMAN]	39.45	1	3	31	109	11.6388	8.29443	0.903319	0.613261	0.647457	0.721346	1.06494	1.77078	0.72218	1.18597	0.608235	0.222487
V9HW25	Epididymis secretory protein Li 273 OS=Homo sapiens GN=HEL-S-273 PE=2 SV=1 - [V9HW25_HUMAN]	53.17	7	20	83	284	32.9696	4.66553	0.751353	0.926105	1.27475	0.984069	1.0844	1.00995	1.30451	1.13295	0.868588	0.448672
O75636	Ficolin-3 OS=Homo sapiens GN=FCN3 PE=1 SV=2 - [FCN3_HUMAN]	48.83	12	12	59	299	32.882	6.66846	1.14785	0.946621	0.740116	0.944861	1.0201	0.905121	1.04262	0.989279	0.955101	0.740613
P26038	Moesin OS=Homo sapiens GN=MSN PE=1 SV=3 - [MOES_HUMAN]	48.53	25	34	87	577	67.7778	6.40479	0.972009	1.0295	1.34144	1.11432	1.08838	0.938028	1.20659	1.07767	1.03401	0.804526
A2KBC6	Anti-FactorVIII scFv (Fragment) OS=Homo sapiens PE=2 SV=1 - [A2KBC6_HUMAN]	26.05	1	5	37	238	24.9542	8.41162	0.763684	0.517038	0.581291	0.620671	1.0686	1.67336	0.732255	1.15807	0.535952	0.13249
P11142	Heat shock cognate 71 kDa protein OS=Homo sapiens GN=HSPA8 PE=1 SV=1 - [HSP7C_HUMAN]	41.02	19	24	70	646	70.8542	5.51611	0.973052	1.0269	1.36409	1.12135	1.04643	0.917385	1.15847	1.04076	1.07743	0.597704
Q0ZCH9	Immunglobulin heavy chain variable region (Fragment) OS=Homo sapiens PE=4 SV=1 - [Q0ZCH9_HUMAN]	47.11	1	5	42	121	13.4275	8.45557	0.465424	0.405984	0.382229	0.417879	1.19789	2.05895	0.488022	1.24829	0.334762	0.141946
P22891	Vitamin K-dependent protein Z OS=Homo sapiens GN=PROZ PE=1 SV=2 - [PROZ_HUMAN]	32.25	11	11	55	400	44.7147	5.97314	1.11874	0.993084	1.09381	1.06854	1.08629	0.96092	0.938802	0.995337	1.07355	0.288521
P27918	Properdin OS=Homo sapiens GN=CFP PE=1 SV=2 - [PROP_HUMAN]	35.82	15	15	80	469	51.242	7.89893	1.04408	1.0347	0.947856	1.00888	0.899942	0.912188	0.975093	0.929074	1.0859	0.106712
Q96IY4	Carboxypeptidase B2 OS=Homo sapiens GN=CPB2 PE=1 SV=2 - [CBPB2_HUMAN]	38.3	15	15	68	423	48.3934	7.7085	1.14489	0.944429	1.01198	1.03377	0.941223	0.856851	0.909496	0.902524	1.14542	0.108882
P20851	C4b-binding protein beta chain OS=Homo sapiens GN=C4BPB PE=1 SV=1 - [C4BPB_HUMAN]	44.84	10	10	64	252	28.3384	5.13525	0.780302	0.645523	0.675793	0.700539	1.09456	1.26153	0.590531	0.982206	0.71323	0.242887
P19652	Alpha-1-acid glycoprotein 2 OS=Homo sapiens GN=ORM2 PE=1 SV=2 - [A1AG2_HUMAN]	31.84	4	6	51	201	23.5876	5.10986	0.697896	0.375519	0.36146	0.478292	1.1416	4.41071	0.438831	1.99705	0.2395	0.284054
Q1HP67	Lipoprotein, Lp(A) OS=Homo sapiens GN=LPA PE=3 SV=1 - [Q1HP67_HUMAN]	29.12	21	21	57	2040	226.369	6.07471	1.10136	0.62591	1.50264	1.07664	1.26652	0.830249	1.08118	1.05932	1.01635	0.954165
O75083	WD repeat-containing protein 1 OS=Homo sapiens GN=WDR1 PE=1 SV=4 - [WDR1_HUMAN]	30.53	1	20	61	606	66.1519	6.65381	1.13534	0.912694	1.12538	1.0578	0.905748	1.00178	1.00148	0.969666	1.09089	0.328857
Q53GN4	WD repeat domain 1, isoform CRA_a (Fragment) OS=Homo sapiens GN=WDR1 PE=2 SV=1 - [Q53GN4_HUMAN]	30.53	1	20	62	606	66.1379	6.65381	1.07159	0.841617	1.15417	1.02246	1.09254	1.00711	1.09564	1.06509	0.959969	0.685675
P07900	Heat shock protein HSP 90-alpha OS=Homo sapiens GN=HSP90AA1 PE=1 SV=5 - [HS90A_HUMAN]	29.92	9	22	56	732	84.6067	5.021	0.969146	0.968912	1.20142	1.04649	1.0648	1.01865	1.114	1.06582	0.981871	0.82573
G3XAP6	Cartilage oligomeric matrix protein OS=Homo sapiens GN=COMP PE=1 SV=1 - [G3XAP6_HUMAN]	41.02	22	23	46	724	79.646	4.61475	1.03937	1.07433	0.916005	1.0099	1.0243	0.957161	1.05138	1.01095	0.998965	0.985883
B3KQT9	Protein disulfide-isomerase OS=Homo sapiens PE=2 SV=1 - [B3KQT9_HUMAN]	45.63	16	21	59	480	54.0685	7.21045	0.928684	0.961765	1.31929	1.06991	1.10743	0.944323	1.19187	1.08121	0.989555	0.94151
B7Z7M2	cDNA FLJ51564, highly similar to Pregnancy zone protein OS=Homo sapiens PE=2 SV=1 - [B7Z7M2_HUMAN]	50.74	1	7	44	136	14.9596	5.10986	0.840014	1.24839	0.670915	0.919772	1.24702	1.40289	0.896446	1.18212	0.778069	0.313262
A6XND1	Insulin-like growth factor binding protein 3 isoform b OS=Homo sapiens GN=IGFBP3 PE=1 SV=1 - [A6XND1_HUMAN]	42.21	10	10	69	263	28.9611	8.45557	0.958914	1.05144	1.07107	1.02714	0.997674	0.960662	1.00716	0.988498	1.03909	0.35962
P01591	Immunoglobulin J chain OS=Homo sapiens GN=JCHAIN PE=1 SV=4 - [IGJ_HUMAN]	59.12	6	6	37	159	18.087	5.23682	0.457833	0.398975	0.370767	0.409191	1.3627	1.57034	0.42276	1.1186	0.365807	0.115573
A0A109PW65	GCT-A3 light chain variable region (Fragment) OS=Homo sapiens PE=2 SV=1 - [A0A109PW65_HUMAN]	31.78	1	2	23	107	11.6197	8.47021	0.655144	0.897372	0.298467	0.616994	0.933901	2.00135	0.611675	1.18231	0.521855	0.281524
A0A0C4DFP6	Cartilage acidic protein 1 OS=Homo sapiens GN=CRTAC1 PE=1 SV=1 - [A0A0C4DFP6_HUMAN]	32.03	16	16	37	637	69.6632	5.2749	0.946484	1.08169	0.847642	0.958604	0.999418	1.16424	1.08939	1.08435	0.884036	0.203888
A0A087X1J7	Glutathione peroxidase OS=Homo sapiens GN=GPX3 PE=1 SV=1 - [A0A087X1J7_HUMAN]	28	6	6	46	225	25.386	8.1333	1.06846	1.03151	0.929927	1.00997	1.07623	0.920585	0.937654	0.978157	1.03252	0.647127
P00338	L-lactate dehydrogenase A chain OS=Homo sapiens GN=LDHA PE=1 SV=2 - [LDHA_HUMAN]	26.51	7	8	34	332	36.6654	8.26514	0.916736	1.01746	1.01036	0.981517	1.21006	0.856514	1.06284	1.04314	0.940928	0.597349
Q9UL70	Myosin-reactive immunoglobulin light chain variable region (Fragment) OS=Homo sapiens PE=2 SV=1 - [Q9UL70_HUMAN]	23.15	1	2	24	108	11.6258	9.36377	0.526154	0.279024	0.332881	0.379353	1.11705	2.51073	0.372322	1.33337	0.284508	0.205201
D3DPU2	Adenylyl cyclase-associated protein OS=Homo sapiens GN=CAP1 PE=2 SV=1 - [D3DPU2_HUMAN]	42.11	5	18	60	475	51.6406	8.01611	0.949162	1.04358	1.50331	1.16535	1.07316	0.918392	1.16802	1.05319	1.10649	0.578996
P52566	Rho GDP-dissociation inhibitor 2 OS=Homo sapiens GN=ARHGDIB PE=1 SV=3 - [GDIR2_HUMAN]	65.17	10	10	44	201	22.9736	5.21143	0.943582	1.02222	1.2224	1.06273	1.17263	0.922319	1.15298	1.08264	0.981611	0.871546
U3PXP0	Alpha globin chain (Fragment) OS=Homo sapiens GN=HBA2 PE=3 SV=1 - [U3PXP0_HUMAN]	66.67	1	3	33	51	5.69882	7.51807	0.946076	0.902901	0.74805	0.865676	0.820833	1.4426	0.807574	1.02367	0.845661	0.508655
P00918	Carbonic anhydrase 2 OS=Homo sapiens GN=CA2 PE=1 SV=2 - [CAH2_HUMAN]	45.77	11	11	41	260	29.2279	7.40088	0.974791	1.00074	1.01621	0.997245	1.10801	0.894494	1.00042	1.00098	0.996273	0.955489
P04040	Catalase OS=Homo sapiens GN=CAT PE=1 SV=3 - [CATA_HUMAN]	42.13	19	19	53	527	59.7188	7.38623	0.953522	0.96304	0.981328	0.965963	1.10738	0.970776	0.930322	1.00283	0.963241	0.533634
P49908	Selenoprotein P OS=Homo sapiens GN=SELENOP PE=1 SV=3 - [SEPP1_HUMAN]	13.91	6	6	48	381	43.1563	7.86963	1.07282	0.9489	0.92496	0.982228	0.945535	0.989999	0.990088	0.975207	1.0072	0.891162
P19320	Vascular cell adhesion protein 1 OS=Homo sapiens GN=VCAM1 PE=1 SV=1 - [VCAM1_HUMAN]	25.17	18	18	43	739	81.2243	5.22412	1.32787	0.988523	0.89515	1.07051	0.918852	0.902031	0.968441	0.929775	1.15137	0.349551
P02763	Alpha-1-acid glycoprotein 1 OS=Homo sapiens GN=ORM1 PE=1 SV=1 - [A1AG1_HUMAN]	40.3	5	7	57	201	23.4968	5.021	0.646007	0.311701	0.296675	0.418128	0.837608	5.46166	0.35557	2.21828	0.188492	0.331816
B4DF70	cDNA FLJ60461, highly similar to Peroxiredoxin-2 (EC 1.11.1.15) OS=Homo sapiens PE=2 SV=1 - [B4DF70_HUMAN]	43.72	8	9	47	183	20.0946	8.77783	1.03002	1.08022	0.989773	1.03334	1.00254	0.859136	0.824674	0.89545	1.15399	0.0845789
P33151	Cadherin-5 OS=Homo sapiens GN=CDH5 PE=1 SV=5 - [CADH5_HUMAN]	16.71	13	13	47	784	87.474	5.42725	1.19819	1.16574	0.965275	1.10973	0.870882	0.94005	1.08933	0.966753	1.1479	0.215487
V9HWK1	Triosephosphate isomerase OS=Homo sapiens GN=HEL-S-49 PE=2 SV=1 - [V9HWK1_HUMAN]	68.67	15	15	43	249	26.6527	6.90283	0.973866	1.05427	1.18053	1.06956	1.07985	0.916788	1.10636	1.03433	1.03406	0.697982
S4R460	Immunoglobulin heavy variable 3/OR16-9 (non-functional) OS=Homo sapiens GN=IGHV3OR16-9 PE=1 SV=2 - [S4R460_HUMAN]	40.63	1	3	23	96	10.423	7.97217	1.11386	0.792437	0.593345	0.833214	0.931083	1.64599	0.91877	1.16528	0.715033	0.30754
Q5CAQ5	Tumor rejection antigen (Gp96) 1 OS=Homo sapiens GN=TRA1 PE=2 SV=1 - [Q5CAQ5_HUMAN]	28.43	21	22	52	802	92.2823	4.85596	1.00651	1.02173	1.2407	1.08965	1.01857	0.911826	1.13029	1.02023	1.06804	0.519808
P00558	Phosphoglycerate kinase 1 OS=Homo sapiens GN=PGK1 PE=1 SV=3 - [PGK1_HUMAN]	43.17	16	16	34	417	44.5861	8.104	0.936588	1.00836	1.2762	1.07372	1.11395	1.00096	1.08725	1.06739	1.00593	0.956418
Q5T123	SH3 domain-binding glutamic acid-rich-like protein 3 OS=Homo sapiens GN=SH3BGRL3 PE=1 SV=1 - [Q5T123_HUMAN]	50	5	5	36	88	9.37476	9.36377	0.932963	0.886931	1.2055	1.00846	1.26567	1.02886	1.21806	1.17086	0.861299	0.256987
A0A0X9UWL5	GCT-A5 light chain variable region (Fragment) OS=Homo sapiens PE=2 SV=1 - [A0A0X9UWL5_HUMAN]	40.71	1	4	28	113	12.4601	6.58057	0.636766	0.48283	0.41145	0.510349	1.00119	2.45609	0.56404	1.34044	0.380733	0.222839
B4DQA0	L-selectin OS=Homo sapiens PE=2 SV=1 - [B4DQA0_HUMAN]	21.85	8	8	51	325	36.3182	6.22705	1.08651	1.04448	0.975892	1.03563	0.990268	1.02342	1.00745	1.00704	1.02839	0.443199
A8K486	Peptidyl-prolyl cis-trans isomerase OS=Homo sapiens PE=2 SV=1 - [A8K486_HUMAN]	59.39	10	11	58	165	18.0018	6.90283	0.979256	1.02418	1.21411	1.07252	1.10756	0.917353	1.17433	1.06642	1.00572	0.956612
Q8NF20	FLJ00382 protein (Fragment) OS=Homo sapiens GN=FLJ00382 PE=2 SV=1 - [Q8NF20_HUMAN]	24.07	1	8	35	482	52.8916	8.66064	0.622118	0.352165	0.346371	0.440218	0.632085	4.89364	0.277512	1.93441	0.227572	0.371522
B4DRR0	cDNA FLJ53910, highly similar to Keratin, type II cytoskeletal 6A OS=Homo sapiens PE=2 SV=1 - [B4DRR0_HUMAN]	32.34	7	20	50	535	57.8032	8.00146	1.22149	0.89276	0.628572	0.914273	0.995196	0.719847	1.06468	0.926573	0.986725	0.954194
P61981	14-3-3 protein gamma OS=Homo sapiens GN=YWHAG PE=1 SV=2 - [1433G_HUMAN]	59.92	9	14	48	247	28.2849	4.89404	1.00143	1.04514	1.23692	1.0945	1.06678	0.980849	1.20823	1.08529	1.00849	0.929731
Q9UL72	Myosin-reactive immunoglobulin heavy chain variable region (Fragment) OS=Homo sapiens PE=2 SV=1 - [Q9UL72_HUMAN]	25.42	1	2	22	118	12.8642	6.58057	0.638672	0.286063	0.358363	0.427699	0.820789	2.97395	0.442956	1.41256	0.302782	0.283437
H7BYY1	Tropomyosin 1 (Alpha), isoform CRA_m OS=Homo sapiens GN=TPM1 PE=1 SV=1 - [H7BYY1_HUMAN]	50.81	6	15	39	248	28.7296	4.81787	0.942222	0.926348	1.42459	1.09772	1.06194	1.04809	1.1479	1.08598	1.01081	0.947148
P0DOX3	Immunoglobulin delta heavy chain OS=Homo sapiens PE=1 SV=1 - [IGD_HUMAN]	22.85	1	8	33	512	56.1891	8.01611	0.785477	0.547034	0.635107	0.655873	0.85522	2.02854	0.714285	1.19935	0.546857	0.267601
O00151	PDZ and LIM domain protein 1 OS=Homo sapiens GN=PDLIM1 PE=1 SV=4 - [PDLI1_HUMAN]	26.14	9	9	25	329	36.049	7.02002	0.946648	1.01811	1.24403	1.0696	1.06404	0.901332	1.24654	1.07063	0.999031	0.994197
A0A1U9X8Y4	Chloride intracellular channel protein OS=Homo sapiens PE=3 SV=1 - [A0A1U9X8Y4_HUMAN]	52.5	9	9	27	240	26.7767	5.26221	0.939302	1.04583	1.27131	1.08548	1.14798	0.926585	1.15608	1.07688	1.00799	0.94778
B4DVE1	cDNA FLJ53478, highly similar to Galectin-3-binding protein OS=Homo sapiens PE=2 SV=1 - [B4DVE1_HUMAN]	23.73	12	12	40	573	64.0558	5.46533	1.16453	0.808111	0.982191	0.984945	1.05711	1.20648	0.806532	1.02338	0.962447	0.817046
A8KAJ3	cDNA FLJ77823, highly similar to Homo sapiens EGF-containing fibulin-like extracellular matrix protein 1, transcript variant 3, mRNA OS=Homo sapiens PE=2 SV=1 - [A8KAJ3_HUMAN]	38.74	15	15	40	493	54.6323	5.13525	1.30496	0.969685	1.03068	1.10177	0.827935	0.924486	0.986461	0.912961	1.20681	0.169917
J3KN67	Tropomyosin alpha-3 chain OS=Homo sapiens GN=TPM3 PE=1 SV=1 - [J3KN67_HUMAN]	47.37	1	18	65	285	33.2018	4.76709	0.87913	1.01242	1.17104	1.02086	1.07792	1.06828	1.20871	1.1183	0.912866	0.366423
P02745	Complement C1q subcomponent subunit A OS=Homo sapiens GN=C1QA PE=1 SV=2 - [C1QA_HUMAN]	23.27	4	4	32	245	26.0002	9.11475	0.808659	1.10461	0.521796	0.811688	1.09434	0.66428	0.89119	0.883268	0.918959	0.749372
P06733	Alpha-enolase OS=Homo sapiens GN=ENO1 PE=1 SV=2 - [ENOA_HUMAN]	38.48	14	15	39	434	47.1393	7.38623	0.87878	0.885811	1.32564	1.03008	1.16516	1.01808	1.12814	1.10379	0.933217	0.65768
A0A024R5W6	Tropomyosin 1 (Alpha), isoform CRA_a OS=Homo sapiens GN=TPM1 PE=3 SV=1 - [A0A024R5W6_HUMAN]	44.37	4	16	42	284	32.6576	4.7417	0.881068	0.88042	1.37049	1.04399	1.14615	1.02364	1.1918	1.12053	0.931695	0.67726
Q15582	Transforming growth factor-beta-induced protein ig-h3 OS=Homo sapiens GN=TGFBI PE=1 SV=1 - [BGH3_HUMAN]	36.31	20	20	47	683	74.634	7.7085	1.14688	1.04314	0.886105	1.02537	0.963444	0.998814	0.907868	0.956709	1.07177	0.440631
B4DMA2	cDNA FLJ54023, highly similar to Heat shock protein HSP 90-beta OS=Homo sapiens PE=2 SV=1 - [B4DMA2_HUMAN]	24.2	3	17	38	686	79.1451	5.021	0.978587	0.97377	1.21565	1.056	0.990139	0.93089	1.11001	1.01035	1.04519	0.658061
B4DNL5	Protein disulfide-isomerase OS=Homo sapiens PE=2 SV=1 - [B4DNL5_HUMAN]	41.67	19	20	42	492	55.3466	4.79248	1.03213	1.02186	1.25978	1.10459	1.03373	0.961337	1.14506	1.04671	1.0553	0.572374
P13647	Keratin, type II cytoskeletal 5 OS=Homo sapiens GN=KRT5 PE=1 SV=3 - [K2C5_HUMAN]	33.05	10	23	56	590	62.34	7.73779	1.27799	1.09702	0.952197	1.10907	0.910412	0.84672	1.1097	0.955612	1.16058	0.280588
P31946	14-3-3 protein beta/alpha OS=Homo sapiens GN=YWHAB PE=1 SV=3 - [1433B_HUMAN]	55.28	5	13	46	246	28.0648	4.83057	0.978598	1.07109	1.30271	1.11746	1.07505	0.884278	1.1671	1.04214	1.07228	0.586123
B4DNA3	Adenylyl cyclase-associated protein OS=Homo sapiens PE=2 SV=1 - [B4DNA3_HUMAN]	35.1	1	14	37	433	47.0913	8.27979	0.934689	0.836504	0.768003	0.846399	1.11347	1.35671	0.777326	1.0825	0.781892	0.248134
P09172	Dopamine beta-hydroxylase OS=Homo sapiens GN=DBH PE=1 SV=3 - [DOPO_HUMAN]	32.41	16	16	32	617	69.0207	6.41748	1.08675	1.17316	0.899099	1.053	1.13351	0.88543	0.913215	0.977386	1.07736	0.539025
H7BYX6	Neural cell adhesion molecule 1 OS=Homo sapiens GN=NCAM1 PE=1 SV=2 - [H7BYX6_HUMAN]	24.55	15	15	38	725	80.2331	4.88135	1.10799	1.00025	0.937994	1.01541	0.964151	0.993307	1.04333	1.00026	1.01514	0.795841
Q6UXB8	Peptidase inhibitor 16 OS=Homo sapiens GN=PI16 PE=1 SV=1 - [PI16_HUMAN]	26.35	10	10	36	463	49.4395	5.38916	1.19763	1.00074	0.916585	1.03832	0.920798	0.921266	1.00207	0.948043	1.09522	0.360743
A2NB45	Cold agglutinin FS-1 L-chain (Fragment) OS=Homo sapiens PE=2 SV=1 - [A2NB45_HUMAN]	32.74	1	2	18	113	12.3802	8.48486	0.705772	0.529818	0.27491	0.5035	1.08362	2.14152	0.430844	1.21866	0.413158	0.236411
B2R983	cDNA, FLJ94267, highly similar to Homo sapiens glutathione S-transferase omega 1 (GSTO1), mRNA OS=Homo sapiens PE=2 SV=1 - [B2R983_HUMAN]	39	11	11	40	241	27.521	6.59521	0.944446	1.08374	1.06309	1.03042	1.02721	1.02565	1.15289	1.06858	0.964291	0.562494
V9H1C1	Gelsolin exon 4 (Fragment) OS=Homo sapiens PE=4 SV=1 - [V9H1C1_HUMAN]	69.57	1	4	48	69	7.97411	5.78271	1.12659	1.00524	0.913295	1.01504	1.04399	0.85134	0.983656	0.959662	1.05771	0.545627
P01861	Immunoglobulin heavy constant gamma 4 OS=Homo sapiens GN=IGHG4 PE=1 SV=1 - [IGHG4_HUMAN]	21.41	2	6	38	327	35.9179	7.35693	1.17941	0.842634	0.932177	0.98474	1.0165	1.25593	1.12585	1.13276	0.869327	0.292423
B3KX75	cDNA FLJ44930 fis, clone BRAMY3015549, highly similar to Neural cell adhesion molecule L1-like protein (Fragment) OS=Homo sapiens PE=2 SV=1 - [B3KX75_HUMAN]	22.64	1	20	37	1113	124.679	6.16357	1.19333	0.969436	1.11199	1.09159	0.940676	1.48276	0.932359	1.1186	0.975851	0.89572
P10599	Thioredoxin OS=Homo sapiens GN=TXN PE=1 SV=3 - [THIO_HUMAN]	31.43	4	4	19	105	11.7297	4.91943	0.998786	1.04636	1.29653	1.11389	1.04885	0.912061	1.1749	1.04527	1.06565	0.596632
U5LGU2	Apolipoprotein L1 (Fragment) OS=Homo sapiens GN=APOL1 PE=4 SV=1 - [U5LGU2_HUMAN]	42.66	14	14	38	293	32.6752	7.15186	0.784471	0.812517	0.755481	0.784156	1.26631	1.56288	0.83749	1.22223	0.64158	0.106723
L7UYB8	Glycoprotein Ib alpha polypeptide G942 deletion mutant OS=Homo sapiens GN=GP1BA PE=2 SV=1 - [L7UYB8_HUMAN]	23.42	6	6	24	333	36.9494	5.63037	1.00444	1.131	0.923696	1.01971	1.03204	1.06903	1.05523	1.0521	0.969212	0.625099
A0N5G5	Rheumatoid factor D5 light chain (Fragment) OS=Homo sapiens GN=V-kappa-3 PE=2 SV=1 - [A0N5G5_HUMAN]	35.59	1	4	27	118	12.7585	8.96826	0.911189	0.859407	0.817844	0.862813	1.00878	1.54645	0.779808	1.11168	0.776135	0.337896
A0N5G3	Rheumatoid factor G9 light chain (Fragment) OS=Homo sapiens GN=V-lambda-3 PE=2 SV=1 - [A0N5G3_HUMAN]	28.93	2	3	18	121	12.8893	6.52197	0.346875	0.353194	0.176783	0.292284	0.444536	1.16337	0.209473	0.605794	0.48248	0.344435
Q04917	14-3-3 protein eta OS=Homo sapiens GN=YWHAH PE=1 SV=4 - [1433F_HUMAN]	60.16	9	13	40	246	28.201	4.84326	0.960082	0.998465	1.2867	1.08175	1.12041	0.934941	1.16139	1.07225	1.00886	0.942778
A0A075B6S2	Immunoglobulin kappa variable 2D-29 OS=Homo sapiens GN=IGKV2D-29 PE=3 SV=1 - [KVD29_HUMAN]	20	1	2	16	120	13.1347	7.12256	0.772354	0.746958	0.705223	0.741512	1.26183	1.74539	0.671731	1.22632	0.604665	0.194107
A0A087X0M8	Neural cell adhesion molecule L1-like protein OS=Homo sapiens GN=CHL1 PE=1 SV=1 - [A0A087X0M8_HUMAN]	20.75	1	20	37	1171	130.713	5.79541	1.07744	1.13526	1.06931	1.094	1.0002	1.06408	0.914773	0.993016	1.1017	0.103059
A0A1W6IYL0	N90-VRC38.07 light chain variable region (Fragment) OS=Homo sapiens PE=2 SV=1 - [A0A1W6IYL0_HUMAN]	18.58	1	2	16	113	12.3632	7.98682	0.570172	0.585905	0.351833	0.502637	0.954571	2.67674	0.423522	1.35161	0.37188	0.282502
B7Z1N6	Fructose-bisphosphate aldolase OS=Homo sapiens PE=2 SV=1 - [B7Z1N6_HUMAN]	17.54	2	6	20	325	35.4011	7.06396	1.08812	1.02061	0.94109	1.01661	1.04845	1.08076	1.23568	1.12163	0.906363	0.216963
P02533	Keratin, type I cytoskeletal 14 OS=Homo sapiens GN=KRT14 PE=1 SV=4 - [K1C14_HUMAN]	27.33	5	13	41	472	51.5294	5.16064	1.3512	0.944743	0.90222	1.06605	0.884436	0.695569	1.15325	0.911086	1.17009	0.47174
A0A140T8Z8	Tenascin-X (Fragment) OS=Homo sapiens GN=TNXB PE=1 SV=1 - [A0A140T8Z8_HUMAN]	8.8	19	19	29	3296	358.438	5.13525	1.05001	1.05608	0.959045	1.02171	1.04159	0.994018	0.967649	1.00109	1.0206	0.617169
A0A087WZB5	Beta-parvin OS=Homo sapiens GN=PARVB PE=1 SV=1 - [A0A087WZB5_HUMAN]	31.14	7	7	24	289	33.2366	5.89697	0.974837	1.04055	1.38981	1.13506	1.06281	0.870455	1.19595	1.04307	1.08819	0.595492
P06702	Protein S100-A9 OS=Homo sapiens GN=S100A9 PE=1 SV=1 - [S10A9_HUMAN]	80.7	7	7	34	114	13.2335	6.12549	0.899275	0.799458	1.01241	0.903715	0.935631	1.23975	1.04504	1.07347	0.841861	0.191535
Q96AF9	ZYX protein (Fragment) OS=Homo sapiens GN=ZYX PE=2 SV=2 - [Q96AF9_HUMAN]	32.62	11	11	24	466	50.4398	7.50342	0.968624	1.10274	1.14284	1.0714	1.15881	0.918794	1.18547	1.08769	0.985026	0.878309
A0A1Z1VXF2	CD44 protein (Fragment) OS=Homo sapiens GN=CD44 PE=4 SV=1 - [A0A1Z1VXF2_HUMAN]	19.6	4	4	31	199	21.8483	4.80518	1.11745	1.00024	0.979402	1.03236	0.961349	1.09159	0.984943	1.01263	1.01949	0.75379
E5RIF9	Carbonic anhydrase 1 (Fragment) OS=Homo sapiens GN=CA1 PE=1 SV=1 - [E5RIF9_HUMAN]	66.22	1	8	30	148	16.3079	6.25244	0.956571	0.598698	1.22298	0.926082	0.755696	1.3246	1.54532	1.20854	0.766282	0.39502
A0A0C4DH25	Immunoglobulin kappa variable 3D-20 OS=Homo sapiens GN=IGKV3D-20 PE=3 SV=1 - [KVD20_HUMAN]	21.55	1	2	13	116	12.5072	4.58936	0.712339	0.715897	0.485647	0.637961	1.1293	1.86708	0.620164	1.20552	0.529201	0.199723
B2RDW0	cDNA, FLJ96792, highly similar to Homo sapiens calmodulin 2 (phosphorylase kinase, delta) (CALM2), mRNA OS=Homo sapiens PE=2 SV=1 - [B2RDW0_HUMAN]	46.98	7	7	31	149	16.7668	4.22119	0.942523	1.04386	1.39579	1.12739	1.1105	0.897715	1.25162	1.08661	1.03753	0.823829
E7ENL6	Collagen alpha-3(VI) chain OS=Homo sapiens GN=COL6A3 PE=1 SV=2 - [E7ENL6_HUMAN]	11.25	25	25	35	2569	277.946	8.17725	1.14671	0.995607	0.952658	1.03166	0.870645	0.989326	0.954508	0.93816	1.09966	0.244474
P02776	Platelet factor 4 OS=Homo sapiens GN=PF4 PE=1 SV=2 - [PLF4_HUMAN]	43.56	2	5	24	101	10.8379	8.6167	1.0012	1.88486	1.60845	1.49817	0.689418	0.437933	1.45063	0.859328	1.74342	0.186344
B2R773	cDNA, FLJ93312, highly similar to Homo sapiens adipose most abundant gene transcript 1 (APM1), mRNA OS=Homo sapiens PE=2 SV=1 - [B2R773_HUMAN]	19.26	4	4	29	244	26.409	5.74463	1.0732	0.79478	1.05798	0.975318	0.891982	1.00647	1.11631	1.00492	0.97054	0.803195
Q6VFQ6	Hemoglobin beta chain (Fragment) OS=Homo sapiens GN=HBB PE=3 SV=1 - [Q6VFQ6_HUMAN]	57.14	1	2	11	42	4.51041	8.23584	0.688653	0.619099	0.69669	0.668147	1.0539	1.51684	0.720215	1.09699	0.609076	0.1386
Q6MZL2	Uncharacterized protein DKFZp686M0562 (Fragment) OS=Homo sapiens GN=DKFZp686M0562 PE=2 SV=1 - [Q6MZL2_HUMAN]	30.84	9	9	24	321	35.1196	5.97314	1.17601	1.0489	0.890837	1.03858	0.910499	1.04485	0.884443	0.946598	1.09717	0.393577
P08779	Keratin, type I cytoskeletal 16 OS=Homo sapiens GN=KRT16 PE=1 SV=4 - [K1C16_HUMAN]	22.41	2	10	36	473	51.2362	5.04639	1.28589	0.845878	0.824373	0.985382	1.07819	0.677854	1.0747	0.943579	1.0443	0.845161
Q9UL85	Myosin-reactive immunoglobulin kappa chain variable region (Fragment) OS=Homo sapiens PE=2 SV=1 - [Q9UL85_HUMAN]	31.19	2	3	15	109	11.7539	8.51416	0.800273	0.747551	0.558883	0.702236	0.973182	1.57418	0.656104	1.06782	0.657633	0.260272
E3UN46	Insulin-like growth factor II transcript variant 3 isoform 1 (Fragment) OS=Homo sapiens GN=IGF2 PE=2 SV=1 - [E3UN46_HUMAN]	22.94	2	2	23	109	12.0209	7.51807	0.985223	1.05681	1.00167	1.01457	0.989638	0.924984	1.00703	0.973884	1.04178	0.285633
P00441	Superoxide dismutase [Cu-Zn] OS=Homo sapiens GN=SOD1 PE=1 SV=2 - [SODC_HUMAN]	37.01	6	6	21	154	15.9259	6.12549	0.932163	0.99285	1.18861	1.03787	1.10743	0.862159	1.11203	1.02721	1.01038	0.929422
P33908	Mannosyl-oligosaccharide 1,2-alpha-mannosidase IA OS=Homo sapiens GN=MAN1A1 PE=1 SV=3 - [MA1A1_HUMAN]	23.74	15	15	36	653	72.9223	6.46826	1.10911	1.05384	0.936808	1.03325	0.944615	0.932606	0.939082	0.938768	1.10065	0.137058
P55072	Transitional endoplasmic reticulum ATPase OS=Homo sapiens GN=VCP PE=1 SV=4 - [TERA_HUMAN]	18.61	15	15	24	806	89.2657	5.26221	0.884702	1.05043	1.26055	1.06523	1.11911	0.868624	1.24975	1.07916	0.98709	0.933121
A0A125U0U7	MS-C1 heavy chain variable region (Fragment) OS=Homo sapiens PE=2 SV=1 - [A0A125U0U7_HUMAN]	22.88	2	2	17	118	13.0884	6.07471	0.705822	0.562913	0.590814	0.61985	1.07468	1.73848	0.587685	1.13361	0.54679	0.201376
Q02985	Complement factor H-related protein 3 OS=Homo sapiens GN=CFHR3 PE=1 SV=2 - [FHR3_HUMAN]	19.7	4	7	36	330	37.2987	7.54736	1.43115	1.00099	1.58529	1.33914	0.601714	1.16715	0.843481	0.870782	1.53786	0.122259
B3KXZ9	cDNA FLJ46477 fis, clone THYMU3025118, highly similar to Cell surface glycoprotein MUC18 OS=Homo sapiens PE=2 SV=1 - [B3KXZ9_HUMAN]	28.63	11	11	25	531	58.9827	5.18604	1.14292	0.976643	0.931953	1.01717	0.993049	0.981333	1.0362	1.00353	1.0136	0.847025
Q9UE52	Apolipoprotein B-100 gene intron CI and flanking regions (Fragment) OS=Homo sapiens PE=4 SV=1 - [Q9UE52_HUMAN]	33.33	1	2	40	36	3.88296	5.0083	0.997701	1.14036	0.867464	1.00184	1.00275	1.03996	1.02988	1.0242	0.978171	0.792709
Q15404	Ras suppressor protein 1 OS=Homo sapiens GN=RSU1 PE=1 SV=3 - [RSU1_HUMAN]	49.82	12	12	32	277	31.5207	8.646	0.91969	1.0125	1.4432	1.12513	1.05568	0.876474	1.20222	1.04479	1.07689	0.689256
O00187	Mannan-binding lectin serine protease 2 OS=Homo sapiens GN=MASP2 PE=1 SV=4 - [MASP2_HUMAN]	18.37	11	11	27	686	75.6536	5.63037	1.10905	0.971471	1.12718	1.06923	0.922408	0.930066	1.0147	0.955724	1.11877	0.11899
A6XMH1	Transthyretin OS=Homo sapiens PE=2 SV=1 - [A6XMH1_HUMAN]	19.57	3	3	13	138	14.9475	5.75732	1.19614	1.00501	1.02675	1.07597	0.916344	0.831694	1.15039	0.966141	1.11367	0.385537
P18065	Insulin-like growth factor-binding protein 2 OS=Homo sapiens GN=IGFBP2 PE=1 SV=2 - [IBP2_HUMAN]	35.38	10	10	22	325	34.7912	7.50342	1.27926	0.752478	1	1.01058	0.940897	1.02117	1.0949	1.01899	0.991746	0.960233
Q6EMK4	Vasorin OS=Homo sapiens GN=VASN PE=1 SV=1 - [VASN_HUMAN]	12.93	7	7	21	673	71.6675	7.38623	1.07336	0.989716	1.0441	1.03572	0.934971	1.01417	0.965631	0.97159	1.06601	0.129323
P27348	14-3-3 protein theta OS=Homo sapiens GN=YWHAQ PE=1 SV=1 - [1433T_HUMAN]	34.69	3	9	35	245	27.7468	4.77979	1.01097	1.02448	1.18788	1.07444	1.07474	0.970339	1.24173	1.0956	0.980687	0.838582
P05109	Protein S100-A8 OS=Homo sapiens GN=S100A8 PE=1 SV=1 - [S10A8_HUMAN]	55.91	6	6	24	93	10.8276	7.03467	0.907597	0.853611	1.07272	0.944644	0.964165	1.18175	1.00106	1.04899	0.900526	0.329864
C0IMJ3	Periostin isoform thy6 OS=Homo sapiens PE=2 SV=1 - [C0IMJ3_HUMAN]	15.24	10	10	12	781	87.2169	7.94287	1.22565	1.03862	0.865454	1.04324	0.958628	0.911631	0.85881	0.90969	1.14681	0.283608
P41222	Prostaglandin-H2 D-isomerase OS=Homo sapiens GN=PTGDS PE=1 SV=1 - [PTGDS_HUMAN]	24.74	4	4	17	190	21.0153	7.79639	1.18787	0.956252	0.820327	0.988149	0.844014	0.972043	0.909783	0.908614	1.08753	0.522009
Q3ZCW2	Galectin-related protein OS=Homo sapiens GN=LGALSL PE=1 SV=2 - [LEGL_HUMAN]	33.72	5	5	12	172	18.9737	5.35107	0.943451	1.07065	1.19493	1.06968	1.0849	1.17129	1.1487	1.13497	0.942477	0.44463
B7Z832	cDNA FLJ51409, highly similar to Thrombospondin-4 OS=Homo sapiens PE=2 SV=1 - [B7Z832_HUMAN]	23.45	11	12	21	870	95.8867	4.64014	1.04055	1.17515	0.814957	1.01022	1.00979	1.01242	1.03817	1.02012	0.990291	0.929699
A0A120HG46	GCT-A10 heavy chain variable region (Fragment) OS=Homo sapiens PE=2 SV=1 - [A0A120HG46_HUMAN]	29.92	1	4	33	127	13.5858	8.80713	0.544785	0.401968	0.410784	0.452512	0.963814	2.60221	0.455334	1.34045	0.337582	0.243304
J3K000	PEPD protein OS=Homo sapiens GN=PEPD PE=2 SV=1 - [J3K000_HUMAN]	41.18	15	15	27	493	54.5469	5.99854	1.072	1.02208	1.04827	1.04745	1.04116	1.01022	1.01468	1.02202	1.02488	0.216601
A0A024RAB6	Heparan sulfate proteoglycan 2 (Perlecan), isoform CRA_b OS=Homo sapiens GN=HSPG2 PE=4 SV=1 - [A0A024RAB6_HUMAN]	3.87	14	14	21	4346	463.723	6.50732	1.1568	0.949641	0.962011	1.02282	0.922656	1.02433	1.01899	0.98866	1.03455	0.671539
F5H265	Polyubiquitin-C (Fragment) OS=Homo sapiens GN=UBC PE=1 SV=1 - [F5H265_HUMAN]	45.64	3	3	16	149	16.8311	6.58057	0.946849	1.02221	1.02821	0.999088	1.07229	1.02358	1.01376	1.03654	0.963864	0.304456
P10720	Platelet factor 4 variant OS=Homo sapiens GN=PF4V1 PE=1 SV=1 - [PF4V_HUMAN]	45.19	1	4	19	104	11.5453	9.1001	1.04183	1.56352	1.48562	1.36366	0.819715	0.653677	1.51514	0.996178	1.36889	0.301303
A8K335	cDNA FLJ76254, highly similar to Homo sapiens gamma-glutamyl hydrolase (GGH), mRNA OS=Homo sapiens PE=2 SV=1 - [A8K335_HUMAN]	33.65	11	11	21	318	36.0243	7.41553	1.01875	1.09801	1.04355	1.05344	0.953491	1.00096	0.850714	0.935055	1.1266	0.0775827
Q8NBP7	Proprotein convertase subtilisin/kexin type 9 OS=Homo sapiens GN=PCSK9 PE=1 SV=3 - [PCSK9_HUMAN]	15.46	10	10	20	692	74.2391	6.60986	1.10606	1.07077	0.896491	1.02444	1.00341	0.955003	0.982921	0.980445	1.04487	0.543149
B4DMH3	Coronin OS=Homo sapiens PE=2 SV=1 - [B4DMH3_HUMAN]	33.18	14	15	34	437	49.3471	7.02002	0.936064	1.02986	1.46018	1.14204	1.05844	0.966195	1.16326	1.06263	1.07472	0.666737
P31146	Coronin-1A OS=Homo sapiens GN=CORO1A PE=1 SV=4 - [COR1A_HUMAN]	31.89	14	15	34	461	50.9938	6.68311	0.929629	1.00571	1.31247	1.0826	1.06797	0.967697	1.17477	1.07015	1.01164	0.92903
Q15084	Protein disulfide-isomerase A6 OS=Homo sapiens GN=PDIA6 PE=1 SV=1 - [PDIA6_HUMAN]	29.09	8	8	12	440	48.0913	5.08447	0.972309	1.05279	1.12096	1.04869	1.1147	0.915915	1.25007	1.09356	0.958965	0.694151
B4DXW1	Actin-related protein 3 OS=Homo sapiens GN=ACTR3 PE=1 SV=1 - [B4DXW1_HUMAN]	33.51	10	10	21	367	41.9773	5.61768	0.939277	1.06917	1.1986	1.06901	1.09053	0.906009	1.23533	1.07729	0.99232	0.948843
Q6YHK3	CD109 antigen OS=Homo sapiens GN=CD109 PE=1 SV=2 - [CD109_HUMAN]	12.04	15	15	20	1445	161.587	5.84619	1.13264	1.0802	1.04901	1.08728	0.971945	0.88041	1.05022	0.967524	1.12378	0.0941779
P58546	Myotrophin OS=Homo sapiens GN=MTPN PE=1 SV=2 - [MTPN_HUMAN]	38.14	3	3	10	118	12.8866	5.51611	0.942877	1.07679	1.26827	1.09598	1.1483	0.859879	1.15438	1.05419	1.03964	0.773135
Q15166	Serum paraoxonase/lactonase 3 OS=Homo sapiens GN=PON3 PE=1 SV=3 - [PON3_HUMAN]	10.17	2	4	23	354	39.5823	5.41455	1.10279	1.05836	1.08579	1.08231	0.964931	1.0588	1.16199	1.06191	1.01921	0.74426
A0A0A0MSI0	Peroxiredoxin-1 (Fragment) OS=Homo sapiens GN=PRDX1 PE=1 SV=1 - [A0A0A0MSI0_HUMAN]	42.11	7	8	18	171	18.9637	6.91748	1.02891	1.02668	1.31009	1.12189	1.01591	0.910675	1.04273	0.989772	1.13349	0.266373
A8K430	Fructose-bisphosphate aldolase OS=Homo sapiens PE=2 SV=1 - [A8K430_HUMAN]	33.24	12	13	21	364	39.4471	8.20654	0.811492	1.00138	0.713188	0.84202	0.825371	1.90166	0.834737	1.18726	0.709215	0.400226
Q14019	Coactosin-like protein OS=Homo sapiens GN=COTL1 PE=1 SV=3 - [COTL1_HUMAN]	66.2	9	9	29	142	15.935	5.66846	1.02894	1.01835	1.25026	1.09918	1.07945	1.0211	1.0348	1.04512	1.05173	0.524496
Q53G71	Calreticulin variant (Fragment) OS=Homo sapiens PE=2 SV=1 - [Q53G71_HUMAN]	44.33	14	14	31	406	46.8901	4.44971	1.02562	1.00199	1.29258	1.10673	1.09066	0.970342	1.20865	1.08989	1.01546	0.891396
B7Z6F3	cDNA FLJ56245, highly similar to Homo sapiens bridging integrator 2 (BIN2), mRNA OS=Homo sapiens PE=2 SV=1 - [B7Z6F3_HUMAN]	17.81	9	9	18	539	59.1513	4.98291	0.957626	0.914936	1.42815	1.10024	1.02208	1.0071	1.10192	1.0437	1.05417	0.752017
H7BZJ3	Protein disulfide-isomerase A3 (Fragment) OS=Homo sapiens GN=PDIA3 PE=1 SV=1 - [H7BZJ3_HUMAN]	53.66	1	6	19	123	13.5108	7.29834	0.959223	0.975246	1.20136	1.04528	1.13202	0.962157	1.3077	1.13396	0.921795	0.522664
P50395	Rab GDP dissociation inhibitor beta OS=Homo sapiens GN=GDI2 PE=1 SV=2 - [GDIB_HUMAN]	37.98	9	14	16	445	50.6309	6.46826	0.972772	1.09406	1.1286	1.06515	1.03692	0.922511	1.16052	1.03998	1.02419	0.777914
V9HWC6	Peptidyl-prolyl cis-trans isomerase OS=Homo sapiens GN=HEL-S-39 PE=2 SV=1 - [V9HWC6_HUMAN]	37.5	8	9	20	208	22.728	9.31982	0.930301	1.03532	1.41596	1.1272	1.06068	0.945407	1.2343	1.08013	1.04358	0.795309
P30041	Peroxiredoxin-6 OS=Homo sapiens GN=PRDX6 PE=1 SV=3 - [PRDX6_HUMAN]	46.43	11	11	21	224	25.0192	6.37939	0.992734	1.04036	0.975701	1.00293	1.09691	0.887043	1.15906	1.04767	0.957298	0.62467
A4D2D2	Procollagen C-endopeptidase enhancer OS=Homo sapiens GN=PCOLCE PE=4 SV=1 - [A4D2D2_HUMAN]	32.29	10	10	29	449	47.928	7.43018	1.06936	0.968621	1.00646	1.01481	0.936591	0.961077	0.900992	0.932887	1.08782	0.0745393
P05362	Intercellular adhesion molecule 1 OS=Homo sapiens GN=ICAM1 PE=1 SV=2 - [ICAM1_HUMAN]	16.92	7	7	11	532	57.789	7.98682	1.11783	1.07666	0.848796	1.01443	0.944869	1.00706	0.954284	0.968738	1.04716	0.622859
Q5NV90	V2-17 protein (Fragment) OS=Homo sapiens GN=V2-17 PE=1 SV=1 - [Q5NV90_HUMAN]	41.24	3	3	20	97	10.3989	4.58936	0.6442	0.609045	0.481757	0.578334	0.884592	1.9387	0.509845	1.11105	0.520531	0.283672
P02741	C-reactive protein OS=Homo sapiens GN=CRP PE=1 SV=1 - [CRP_HUMAN]	24.55	6	6	24	224	25.0227	5.63037	0.841883	1.10106	0.431702	0.791548	0.426841	1.28344	0.401084	0.703789	1.12469	0.814017
P15144	Aminopeptidase N OS=Homo sapiens GN=ANPEP PE=1 SV=4 - [AMPN_HUMAN]	19.96	17	17	30	967	109.471	5.47803	1.12591	1.02952	1.0148	1.05674	0.922878	1.17057	0.973158	1.0222	1.03379	0.699445
A0A193CHQ9	10E8 heavy chain variable region (Fragment) OS=Homo sapiens PE=2 SV=1 - [A0A193CHQ9_HUMAN]	19.85	1	2	20	131	14.472	7.94287	0.568335	0.420165	0.40357	0.464023	1.07134	2.50012	0.436398	1.33595	0.347335	0.227672
P52209	6-phosphogluconate dehydrogenase, decarboxylating OS=Homo sapiens GN=PGD PE=1 SV=3 - [6PGD_HUMAN]	16.77	8	8	12	483	53.106	7.2251	0.989404	1.05735	1.2215	1.08942	1.02501	0.985827	1.10212	1.03765	1.04989	0.537705
F8W020	Nucleosome assembly protein 1-like 1 (Fragment) OS=Homo sapiens GN=NAP1L1 PE=1 SV=1 - [F8W020_HUMAN]	43	7	7	12	207	24.3513	4.51318	0.906224	0.999984	1.23855	1.04825	1.13476	0.961428	1.25442	1.11687	0.938563	0.626725
C9J813	Caldesmon (Fragment) OS=Homo sapiens GN=CALD1 PE=1 SV=1 - [C9J813_HUMAN]	27.89	10	10	11	459	54.1265	5.71924	0.919823	0.951696	1.53552	1.13568	0.905792	0.852385	1.39756	1.05191	1.07963	0.767623
S6BGF5	IgG H chain OS=Homo sapiens PE=2 SV=1 - [S6BGF5_HUMAN]	14.58	1	3	14	240	25.5836	8.55811	0.611927	0.526122	0.593762	0.57727	0.86279	2.42952	0.568522	1.28694	0.448559	0.286943
Q9HCC1	Single chain Fv (Fragment) OS=Homo sapiens PE=1 SV=1 - [Q9HCC1_HUMAN]	36.61	1	3	15	112	12.235	8.47021	0.980377	0.959207	0.80563	0.915071	1.06819	1.16712	0.854309	1.02987	0.888528	0.345657
P09211	Glutathione S-transferase P OS=Homo sapiens GN=GSTP1 PE=1 SV=2 - [GSTP1_HUMAN]	26.19	4	4	9	210	23.341	5.64307	0.984551	1.04997	1.03576	1.02342	1.09011	1.0388	1.14794	1.09228	0.936958	0.138313
B2R5G8	Serum amyloid A protein OS=Homo sapiens PE=2 SV=1 - [B2R5G8_HUMAN]	21.54	3	3	13	130	14.7983	8.98291	0.905696	0.876084	0.820717	0.867499	1.13399	1.57765	0.992302	1.23465	0.70263	0.108217
A0A125U0V2	GCT-A1 heavy chain variable region (Fragment) OS=Homo sapiens PE=2 SV=1 - [A0A125U0V2_HUMAN]	25.2	1	3	21	127	13.7089	8.77783	0.446704	0.346865	0.279233	0.357601	1.23501	2.15017	0.396459	1.26055	0.283687	0.150585
A2J422	Anti-HER3 scFv (Fragment) OS=Homo sapiens PE=2 SV=1 - [A2J422_HUMAN]	8.2	1	2	14	244	26.0085	8.39697	0.686063	0.520038	0.522061	0.576054	1.05234	2.27877	0.594016	1.30838	0.440281	0.221309
P62328	Thymosin beta-4 OS=Homo sapiens GN=TMSB4X PE=1 SV=2 - [TYB4_HUMAN]	56.82	3	3	22	44	5.04952	5.05908	0.688052	1.56241	1.38045	1.21031	1.27191	0.696767	0.577404	0.848693	1.42608	0.349884
P27487	Dipeptidyl peptidase 4 OS=Homo sapiens GN=DPP4 PE=1 SV=2 - [DPP4_HUMAN]	11.1	9	9	15	766	88.2225	6.03662	1.01368	1.11873	1.08905	1.07382	0.974759	1.05864	1.02332	1.01891	1.0539	0.237879
A5YAK2	Apolipoprotein C-IV OS=Homo sapiens GN=APOC4 PE=2 SV=1 - [A5YAK2_HUMAN]	35.43	4	5	21	127	14.5704	9.12939	0.76418	0.941408	1.12125	0.942278	1.7518	0.898013	1.0208	1.22354	0.770128	0.380686
A2J1N5	Rheumatoid factor RF-ET6 (Fragment) OS=Homo sapiens PE=2 SV=1 - [A2J1N5_HUMAN]	30.85	1	3	20	94	10.4432	9.12939	0.556046	0.522213	0.366091	0.48145	1.09374	2.30976	0.440414	1.2813	0.375751	0.220124
A0A1U9X7W4	HSPA1A OS=Homo sapiens PE=3 SV=1 - [A0A1U9X7W4_HUMAN]	17.32	6	10	22	641	69.995	5.65576	0.942121	0.990652	1.28544	1.07274	1.07719	0.935329	1.10792	1.04015	1.03133	0.798929
P62942	Peptidyl-prolyl cis-trans isomerase FKBP1A OS=Homo sapiens GN=FKBP1A PE=1 SV=2 - [FKB1A_HUMAN]	25	2	2	7	108	11.9431	8.1626	0.90178	0.993054	1.34795	1.08093	1.02035	0.990458	1.03213	1.01431	1.06568	0.651421
A8K6K4	cDNA FLJ77565, highly similar to Homo sapiens interleukin 1 receptor accessory protein (IL1RAP), transcript variant 1, mRNA OS=Homo sapiens PE=2 SV=1 - [A8K6K4_HUMAN]	12.81	8	8	16	570	65.3907	8.22119	1.13704	0.98126	1.01112	1.04314	1.04453	0.975927	1.00059	1.00702	1.03587	0.523832
A2J1N0	Rheumatoid factor RF-IP14 (Fragment) OS=Homo sapiens PE=2 SV=1 - [A2J1N0_HUMAN]	18.75	1	2	15	96	10.4921	8.96826	0.48636	0.403539	0.278358	0.389419	1.25943	1.96803	0.416945	1.2148	0.320562	0.142123
Q15430	Coagulation factor V (Fragment) OS=Homo sapiens GN=F5 PE=2 SV=1 - [Q15430_HUMAN]	30.51	1	5	13	236	26.1288	5.47803	1.89749	1.62869	0.773163	1.43312	0.361186	0.718455	1.14656	0.742066	1.93125	0.165545
A3RKG7	Coagulation factor VII (Fragment) OS=Homo sapiens PE=2 SV=1 - [A3RKG7_HUMAN]	35.53	6	6	12	273	30.1264	8.33838	1.01462	0.945849	0.913757	0.958075	1.00466	1.03175	0.962483	0.999634	0.958427	0.311857
Q99497	Protein/nucleic acid deglycase DJ-1 OS=Homo sapiens GN=PARK7 PE=1 SV=2 - [PARK7_HUMAN]	49.74	8	8	22	189	19.8785	6.78564	1.00405	1.04884	1.26416	1.10568	1.09019	0.980387	1.11966	1.06341	1.03975	0.665677
B2R7D2	cDNA, FLJ93389, highly similar to Homo sapiens multiple inositol polyphosphate histidine phosphatase, 1 (MINPP1), mRNA OS=Homo sapiens PE=2 SV=1 - [B2R7D2_HUMAN]	24.02	10	10	21	487	55.0852	7.97217	1.14899	1.02066	1.0325	1.06738	1.03099	0.893006	0.932833	0.952275	1.12087	0.117933
B4DRV4	cDNA FLJ55667, highly similar to Secreted protein acidic and rich in cysteine OS=Homo sapiens PE=2 SV=1 - [B4DRV4_HUMAN]	32.08	7	7	25	212	24.6861	5.61768	0.919239	1.17021	1.37787	1.15577	1.00058	0.909647	1.18907	1.0331	1.11875	0.475743
B3KSS4	cDNA FLJ36858 fis, clone ASTRO2015185, highly similar to POLIOVIRUS RECEPTOR OS=Homo sapiens PE=2 SV=1 - [B3KSS4_HUMAN]	11.6	4	4	9	362	39.5547	6.66846	1.08828	1.22817	0.887611	1.06802	0.995592	0.928385	1.058	0.993993	1.07447	0.52223
Q9UL84	Myosin-reactive immunoglobulin heavy chain variable region (Fragment) OS=Homo sapiens PE=2 SV=1 - [Q9UL84_HUMAN]	14.75	1	2	9	122	13.5706	8.45557	0.67446	0.6171	0.65989	0.650483	1.06509	1.99749	0.74032	1.26763	0.513147	0.177127
P48059	LIM and senescent cell antigen-like-containing domain protein 1 OS=Homo sapiens GN=LIMS1 PE=1 SV=4 - [LIMS1_HUMAN]	30.77	9	9	16	325	37.2258	8.04541	0.831338	0.980723	1.09587	0.96931	1.20438	1.0018	1.08193	1.09604	0.884378	0.259835
Q0ZCH5	Immunglobulin heavy chain variable region (Fragment) OS=Homo sapiens PE=4 SV=1 - [Q0ZCH5_HUMAN]	15.13	1	2	8	119	12.9625	8.83643	0.451826	0.395926	0.442547	0.4301	0.518964	1.31145	0.389037	0.739818	0.581358	0.343899
P00491	Purine nucleoside phosphorylase OS=Homo sapiens GN=PNP PE=1 SV=2 - [PNPH_HUMAN]	32.53	8	8	18	289	32.0972	6.94678	0.995893	1.03686	1.09185	1.04154	1.05407	0.900293	1.1022	1.01885	1.02226	0.751723
P54108	Cysteine-rich secretory protein 3 OS=Homo sapiens GN=CRISP3 PE=1 SV=1 - [CRIS3_HUMAN]	16.73	5	5	26	245	27.612	7.79639	1.09506	0.997848	0.929267	1.00739	1.00018	0.929541	1.06801	0.999245	1.00815	0.902642
Q14769	Alpha-N-acetylglucosaminidase OS=Homo sapiens GN=ufHSD2 PE=4 SV=1 - [Q14769_HUMAN]	8.61	4	4	7	639	71.9821	6.3667	1.03916	1.15373	0.987495	1.06013	0.930405	1.13297	1.144	1.06912	0.991586	0.920859
B3GN61	Truncated E-cadherin OS=Homo sapiens GN=CDH1 PE=2 SV=1 - [B3GN61_HUMAN]	18.07	10	10	17	758	83.7706	4.89404	1.03935	1.08168	0.827145	0.982724	0.907688	0.874006	1.01768	0.933126	1.05315	0.610534
P37837	Transaldolase OS=Homo sapiens GN=TALDO1 PE=1 SV=2 - [TALDO_HUMAN]	23.44	8	8	12	337	37.5165	6.81494	1.02055	0.98743	1.25394	1.08731	1.06285	0.985519	1.14116	1.06318	1.0227	0.812278
B7ZLY3	LTBP1 protein OS=Homo sapiens GN=LTBP1 PE=2 SV=1 - [B7ZLY3_HUMAN]	6.13	6	6	10	1353	148.364	5.09717	0.903039	1.13441	1.39409	1.14384	0.93824	0.846177	1.15479	0.979736	1.1675	0.385927
Q9Y5Y7	Lymphatic vessel endothelial hyaluronic acid receptor 1 OS=Homo sapiens GN=LYVE1 PE=1 SV=2 - [LYVE1_HUMAN]	8.07	3	3	14	322	35.191	8.27979	1.12117	0.853454	0.993644	0.989424	1.13369	0.97315	0.853102	0.986649	1.00281	0.981447
G3V0E5	Transferrin receptor (P90, CD71), isoform CRA_c OS=Homo sapiens GN=TFRC PE=1 SV=1 - [G3V0E5_HUMAN]	15.61	9	9	12	679	75.9166	6.81494	1.14203	1.0904	1.01057	1.081	1.0502	1.00284	0.948967	1.00067	1.08028	0.170479
B4E3A8	cDNA FLJ53963, highly similar to Leukocyte elastase inhibitor OS=Homo sapiens PE=2 SV=1 - [B4E3A8_HUMAN]	19.94	7	7	12	341	38.6607	6.66846	0.92318	1.03248	1.47123	1.1423	1.08111	0.906107	1.15803	1.04842	1.08954	0.635522
Q9BWP8	Collectin-11 OS=Homo sapiens GN=COLEC11 PE=1 SV=1 - [COL11_HUMAN]	12.92	3	3	6	271	28.647	5.41455	1.02962	1.19237	1.15244	1.12481	0.919978	0.6945	1.15247	0.922315	1.21955	0.224272
P55058	Phospholipid transfer protein OS=Homo sapiens GN=PLTP PE=1 SV=1 - [PLTP_HUMAN]	9.13	4	4	9	493	54.7045	7.00537	1.04796	0.982842	0.977621	1.00281	0.987566	1.06788	0.964989	1.00681	0.996021	0.922264
B2R7T8	cDNA, FLJ93598, highly similar to Homo sapiens capping protein (actin filament) muscle Z-line, beta (CAPZB), mRNA OS=Homo sapiens PE=2 SV=1 - [B2R7T8_HUMAN]	24.63	6	6	12	272	30.6374	5.99854	0.948252	0.973097	1.33251	1.08462	1.00783	1.03382	1.09738	1.04634	1.03658	0.778074
H0YLF3	Beta-2-microglobulin (Fragment) OS=Homo sapiens GN=B2M PE=1 SV=1 - [H0YLF3_HUMAN]	28.17	2	2	16	71	8.49315	5.14795	1.20026	0.60775	1.10819	0.972067	0.836095	0.93737	0.846036	0.873167	1.11327	0.624675
P18669	Phosphoglycerate mutase 1 OS=Homo sapiens GN=PGAM1 PE=1 SV=2 - [PGAM1_HUMAN]	24.8	5	5	9	254	28.7858	7.18115	1.00724	0.939918	1.23612	1.06109	0.994889	0.922327	1.12731	1.01484	1.04557	0.690206
P81605	Dermcidin OS=Homo sapiens GN=DCD PE=1 SV=2 - [DCD_HUMAN]	42.73	7	7	13	110	11.2768	6.53662	0.9204	1.04365	0.698628	0.88756	0.933035	1.17058	1.16509	1.08957	0.814597	0.188949
Q12913	Receptor-type tyrosine-protein phosphatase eta OS=Homo sapiens GN=PTPRJ PE=1 SV=3 - [PTPRJ_HUMAN]	5.53	6	6	13	1337	145.851	5.57959	1.0853	1.04526	0.936374	1.02231	0.982611	0.997815	1.01778	0.999402	1.02292	0.642133
B4DPW9	cDNA FLJ51929, highly similar to Plastin-3 OS=Homo sapiens PE=2 SV=1 - [B4DPW9_HUMAN]	10.28	1	6	20	603	67.5566	5.65576	0.506693	1.36158	1.47757	1.11528	1.02927	0.784145	1.38166	1.06502	1.04719	0.893327
E7EQR4	Ezrin OS=Homo sapiens GN=EZR PE=1 SV=3 - [E7EQR4_HUMAN]	14.68	2	11	26	586	69.3287	6.16357	1.11923	1.06403	1.13442	1.10589	0.935619	0.943201	1.14881	1.00921	1.0958	0.256187
A0A024R5M3	Cortactin, isoform CRA_c OS=Homo sapiens GN=CTTN PE=4 SV=1 - [A0A024R5M3_HUMAN]	16.37	8	8	10	513	57.4315	5.32568	0.982725	1.05912	1.1939	1.07858	1.06482	1.00673	1.14052	1.07069	1.00737	0.919009
Q5VZR0	Golgi-associated plant pathogenesis-related protein 1 OS=Homo sapiens GN=GLIPR2 PE=1 SV=1 - [Q5VZR0_HUMAN]	26.56	3	3	5	128	14.2041	9.51025	1.13869	1.18294	1.06818	1.12993	0.952795	1.01272	1.06705	1.01085	1.1178	0.0642773
J3KTB5	Eukaryotic initiation factor 4A-I (Fragment) OS=Homo sapiens GN=EIF4A1 PE=1 SV=1 - [J3KTB5_HUMAN]	13.23	3	3	5	257	29.0629	5.08447	0.913704	1.03313	1.33151	1.09278	1.09944	1.00014	1.20649	1.10202	0.991613	0.949737
A0A0B4J1R6	Transketolase OS=Homo sapiens GN=TKT PE=1 SV=1 - [A0A0B4J1R6_HUMAN]	21.66	7	7	13	457	49.8789	7.91357	1.02293	1.03036	1.0965	1.04993	1.01315	1.00865	1.1158	1.04587	1.00388	0.927731
E7EX60	Neuropilin-1 OS=Homo sapiens GN=NRP1 PE=1 SV=1 - [E7EX60_HUMAN]	14.82	9	9	12	641	72.0474	6.78564	1.10796	0.947638	0.989099	1.0149	0.910214	0.94665	0.958551	0.938471	1.08144	0.202534
B7Z766	cDNA FLJ54564, highly similar to 150 kDa oxygen-regulated protein (Orp150) OS=Homo sapiens PE=2 SV=1 - [B7Z766_HUMAN]	14.27	10	10	15	848	94.1411	5.0083	1.12747	0.952503	0.897457	0.992478	0.987067	0.970206	1.00246	0.986578	1.00598	0.936851
Q13790	Apolipoprotein F OS=Homo sapiens GN=APOF PE=1 SV=2 - [APOF_HUMAN]	11.66	3	3	7	326	35.377	5.64307	1.14315	0.728971	0.698917	0.857013	1.1088	1.46469	1.04466	1.20605	0.710594	0.146276
A0A1U9WZ84	Insulin-like growth factor I (Fragment) OS=Homo sapiens PE=3 SV=1 - [A0A1U9WZ84_HUMAN]	50	3	3	6	70	7.64963	7.60596	0.965188	0.927117	1.05468	0.982328	1.08469	1.15288	0.972984	1.07018	0.917906	0.245705
Q16853	Membrane primary amine oxidase OS=Homo sapiens GN=AOC3 PE=1 SV=3 - [AOC3_HUMAN]	6.95	5	5	10	763	84.5683	6.52197	1.05059	1.01696	0.968446	1.012	0.968454	1.07795	1.04563	1.03068	0.981874	0.666993
B3KPS3	Tubulin alpha chain OS=Homo sapiens PE=2 SV=1 - [B3KPS3_HUMAN]	22.6	3	8	13	416	46.2118	5.12256	0.867385	1.04929	1.52911	1.1486	1.0631	0.7105	1.26388	1.01249	1.13442	0.62204
Q76LX8	A disintegrin and metalloproteinase with thrombospondin motifs 13 OS=Homo sapiens GN=ADAMTS13 PE=1 SV=1 - [ATS13_HUMAN]	5.05	6	6	8	1427	153.505	7.1665	1.08034	1.11848	0.955655	1.05149	1.02241	0.911606	1.01522	0.983081	1.06959	0.323595
B3KRY3	cDNA FLJ35079 fis, clone PLACE6005283, highly similar to Lysosome-associated membrane glycoprotein 1 OS=Homo sapiens PE=2 SV=1 - [B3KRY3_HUMAN]	6.84	3	3	6	395	42.5584	8.49951	0.962464	1.01607	0.978335	0.985624	1.06308	1.05299	1.00533	1.04047	0.94729	0.0831684
Q14515	SPARC-like protein 1 OS=Homo sapiens GN=SPARCL1 PE=1 SV=2 - [SPRL1_HUMAN]	9.79	5	5	10	664	75.1613	4.80518	1.18133	0.900956	1.00833	1.03021	0.890406	1.13389	1.02576	1.01668	1.0133	0.906264
B9EJA8	Mannose receptor, C type 1-like 1 OS=Homo sapiens GN=MRC1L1 PE=2 SV=1 - [B9EJA8_HUMAN]	8.24	13	13	16	1456	165.918	6.50732	1.1543	0.971964	1.11672	1.08099	0.941791	0.932253	0.894252	0.922765	1.17147	0.0511516
P40925	Malate dehydrogenase, cytoplasmic OS=Homo sapiens GN=MDH1 PE=1 SV=4 - [MDHC_HUMAN]	18.86	7	7	13	334	36.403	7.35693	0.951395	1.0852	1.25958	1.09873	0.986413	0.993344	1.19933	1.0597	1.03683	0.747859
Q13103	Secreted phosphoprotein 24 OS=Homo sapiens GN=SPP2 PE=1 SV=1 - [SPP24_HUMAN]	9.95	2	2	6	211	24.3218	8.32373	1.99573	1.13359	1.46785	1.53239	0.604159	0.736502	1.5978	0.979486	1.56448	0.239085
B4E3Q4	Adenosine deaminase 2 OS=Homo sapiens GN=ADA2 PE=1 SV=1 - [B4E3Q4_HUMAN]	11.3	6	6	9	469	54.3248	8.14795	1.30508	0.989072	0.873193	1.05578	0.931814	0.927944	0.940091	0.933283	1.13125	0.396451
P08294	Extracellular superoxide dismutase [Cu-Zn] OS=Homo sapiens GN=SOD3 PE=1 SV=2 - [SODE_HUMAN]	30.42	5	5	8	240	25.8347	6.60986	1.02148	1.58038	0.736927	1.11293	0.915952	0.969883	0.888855	0.924897	1.2033	0.491993
Q9P1F3	Costars family protein ABRACL OS=Homo sapiens GN=ABRACL PE=1 SV=1 - [ABRAL_HUMAN]	65.43	3	3	6	81	9.05086	6.29053	0.951264	1.22868	1.01191	1.06395	1.12175	0.837151	1.15496	1.03795	1.02505	0.852795
B4DWQ5	cDNA FLJ51655, highly similar to Actin-like protein 2 OS=Homo sapiens PE=2 SV=1 - [B4DWQ5_HUMAN]	14.75	3	4	15	305	34.4859	5.71924	1.00978	1.03472	1.05647	1.03366	1.04482	0.947414	1.11675	1.03633	0.997421	0.96063
P04180	Phosphatidylcholine-sterol acyltransferase OS=Homo sapiens GN=LCAT PE=1 SV=1 - [LCAT_HUMAN]	10.91	4	4	10	440	49.5461	6.11279	0.959982	0.919248	0.909651	0.929627	1.05281	1.3965	0.950605	1.1333	0.82028	0.207885
Q9ULI3	Protein HEG homolog 1 OS=Homo sapiens GN=HEG1 PE=1 SV=3 - [HEG1_HUMAN]	4.56	5	5	9	1381	147.369	6.17627	1.1294	0.978924	0.94573	1.01802	0.971863	1.03595	1.03282	1.01354	1.00441	0.944371
J3QQX6	Intercellular adhesion molecule 2 (Fragment) OS=Homo sapiens GN=ICAM2 PE=1 SV=1 - [J3QQX6_HUMAN]	28.97	6	6	16	214	23.6618	6.50732	1.18226	1.11506	0.857068	1.05146	0.957004	0.916457	0.999473	0.957645	1.09797	0.409619
Q13201	Multimerin-1 OS=Homo sapiens GN=MMRN1 PE=1 SV=3 - [MMRN1_HUMAN]	5.21	4	4	7	1228	138.023	7.92822	0.891522	0.928095	1.10465	0.974755	0.972185	1.01269	1.1171	1.03399	0.94271	0.493475
P34096	Ribonuclease 4 OS=Homo sapiens GN=RNASE4 PE=1 SV=3 - [RNAS4_HUMAN]	35.37	5	5	11	147	16.8294	9.02686	1.1104	1.00453	0.989076	1.03467	0.917064	0.885518	0.99987	0.934151	1.1076	0.120849
A8K690	cDNA FLJ76863, highly similar to Homo sapiens stress-induced-phosphoprotein 1 (Hsp70/Hsp90-organizing protein) (STIP1), mRNA OS=Homo sapiens PE=2 SV=1 - [A8K690_HUMAN]	15.65	10	10	11	543	62.6154	6.80029	0.974219	1.01623	1.2321	1.07418	1.02682	0.95585	1.15227	1.04498	1.02795	0.781352
P52565	Rho GDP-dissociation inhibitor 1 OS=Homo sapiens GN=ARHGDIA PE=1 SV=3 - [GDIR1_HUMAN]	46.08	7	7	14	204	23.1927	5.10986	0.982974	1.0562	1.30138	1.11352	1.07821	0.914532	1.18184	1.05819	1.05228	0.678061
Q9BTY2	Plasma alpha-L-fucosidase OS=Homo sapiens GN=FUCA2 PE=1 SV=2 - [FUCO2_HUMAN]	8.35	4	4	5	467	54.0321	6.25244	1.06278	1.06557	0.986519	1.03829	0.853907	0.956457	0.997638	0.936001	1.10928	0.110057
Q12860	Contactin-1 OS=Homo sapiens GN=CNTN1 PE=1 SV=1 - [CNTN1_HUMAN]	12.48	12	12	14	1018	113.249	5.89697	1.08232	1.07248	1.01388	1.05623	0.957485	1.03705	0.999252	0.997929	1.05842	0.136673
A0A0S2Z4D8	Protein kinase C substrate 80K-H isoform 1 (Fragment) OS=Homo sapiens GN=PRKCSH PE=2 SV=1 - [A0A0S2Z4D8_HUMAN]	18.8	8	8	13	399	45.0963	4.32275	1.01136	0.954729	1.19879	1.05496	1.08902	0.977735	1.02183	1.02953	1.0247	0.767998
A0A024RDA6	Insulin-like growth factor binding protein 7, isoform CRA_a (Fragment) OS=Homo sapiens GN=IGFBP7 PE=4 SV=1 - [A0A024RDA6_HUMAN]	23.2	4	4	5	194	20.3383	8.54346	1.26216	0.809585	0.971614	1.01445	0.894132	1.10531	0.930542	0.976661	1.03869	0.810507
Q07954	Prolow-density lipoprotein receptor-related protein 1 OS=Homo sapiens GN=LRP1 PE=1 SV=2 - [LRP1_HUMAN]	2.75	12	12	13	4544	504.276	5.38916	1.14895	0.992167	1.06713	1.06942	0.934613	1.05174	0.979524	0.988627	1.08172	0.227257
C9IZP8	Complement C1s subcomponent (Fragment) OS=Homo sapiens GN=C1S PE=1 SV=1 - [C9IZP8_HUMAN]	16.5	1	1	14	103	11.8006	4.1958	0.874867	0.816354	0.658844	0.783355	1.1405	1.25783	0.874694	1.09101	0.718009	0.0777338
A0A087X1X5	Calponin (Fragment) OS=Homo sapiens GN=CNN2 PE=1 SV=1 - [A0A087X1X5_HUMAN]	8.9	2	2	4	191	20.9452	8.86572	0.817431	1.11687	1.54576	1.16002	1.00319	0.900449	1.13647	1.01337	1.14472	0.545188
P31150	Rab GDP dissociation inhibitor alpha OS=Homo sapiens GN=GDI1 PE=1 SV=2 - [GDIA_HUMAN]	26.62	4	9	9	447	50.5501	5.13525	1.01542	1.0906	1.18813	1.09805	1.09475	0.961998	1.13914	1.0653	1.03075	0.676971
A0A0U2N547	Mast/stem cell growth factor receptor Kit isoform 3 OS=Homo sapiens GN=KIT PE=2 SV=1 - [A0A0U2N547_HUMAN]	5.87	6	6	7	971	109.294	6.88818	0.946302	1.02649	1.08678	1.01986	1.00452	1.03583	0.998802	1.01305	1.00672	0.879908
Q13418	Integrin-linked protein kinase OS=Homo sapiens GN=ILK PE=1 SV=2 - [ILK_HUMAN]	19.69	9	9	16	452	51.3859	8.07471	0.854519	0.995555	1.08432	0.97813	1.21887	1.09722	1.02967	1.11526	0.877046	0.189456
A2IPI6	HRV Fab 027-VL (Fragment) OS=Homo sapiens PE=2 SV=1 - [A2IPI6_HUMAN]	20.35	1	2	10	113	12.3752	9.40771	0.672624	0.62062	0.425871	0.573038	0.878678	2.11446	0.447609	1.14692	0.499634	0.319369
C9JFR7	Cytochrome c (Fragment) OS=Homo sapiens GN=CYCS PE=1 SV=1 - [C9JFR7_HUMAN]	39.6	4	4	5	101	11.326	9.65674	0.974298	0.901568	1.1423	1.00606	1.13939	1.02166	1.07398	1.07834	0.932964	0.41195
A8K3B0	cDNA FLJ77877, highly similar to Human ENO2 neuron specific (gamma) enolase OS=Homo sapiens PE=2 SV=1 - [A8K3B0_HUMAN]	8.76	2	3	5	434	47.2831	5.03369	1.00518	1.10724	1.41157	1.17466	1.08295	0.826035	1.2083	1.0391	1.13047	0.45998
P16930	Fumarylacetoacetase OS=Homo sapiens GN=FAH PE=1 SV=2 - [FAAA_HUMAN]	14.8	6	6	9	419	46.3442	6.94678	1.01875	1.04154	0.929609	0.996632	0.973546	1.2711	0.88924	1.04463	0.954055	0.711313
O60234	Glia maturation factor gamma OS=Homo sapiens GN=GMFG PE=1 SV=1 - [GMFG_HUMAN]	33.8	4	4	4	142	16.7904	5.26221	0.887206	1.06543	1.28899	1.08054	1.10553	0.955524	1.24176	1.10094	0.981472	0.89319
P26447	Protein S100-A4 OS=Homo sapiens GN=S100A4 PE=1 SV=1 - [S10A4_HUMAN]	36.63	5	5	15	101	11.7207	6.11279	0.976578	1.03807	1.35309	1.12258	1.09444	0.900531	1.19896	1.06464	1.05442	0.711292
A0A024R6Y5	Dipeptidase OS=Homo sapiens GN=DPEP2 PE=3 SV=1 - [A0A024R6Y5_HUMAN]	12.76	5	5	7	486	53.3313	6.53662	1.19811	1.04278	0.961278	1.06739	0.870609	0.976957	0.97152	0.939695	1.13589	0.17519
B4DG86	cDNA FLJ60487, highly similar to Macrophage colony-stimulating factor 1receptor (CSF-1-R) (EC 2.7.10.1) OS=Homo sapiens PE=2 SV=1 - [B4DG86_HUMAN]	9.62	2	2	5	343	37.4251	6.88818	1.0336	0.95365	0.649768	0.879005	1.03556	1.05514	0.842391	0.977698	0.899055	0.505852
O75144	ICOS ligand OS=Homo sapiens GN=ICOSLG PE=1 SV=2 - [ICOSL_HUMAN]	12.58	3	3	5	302	33.3277	5.31299	1.07166	1.0618	0.968244	1.0339	0.948385	1.22153	1.05749	1.0758	0.961053	0.651415
J3KPD9	NME1-NME2 readthrough OS=Homo sapiens GN=NME1-NME2 PE=1 SV=1 - [J3KPD9_HUMAN]	37.06	5	5	18	197	22.4077	9.53955	0.954588	1.07063	1.29556	1.10693	1.07918	0.89712	1.14546	1.04059	1.06375	0.622687
P06312	Immunoglobulin kappa variable 4-1 OS=Homo sapiens GN=IGKV4-1 PE=1 SV=1 - [KV401_HUMAN]	27.27	1	3	12	121	13.3716	5.24951	0.338632	0.222233	0.259503	0.273456	1.19039	2.90016	0.246393	1.44565	0.189158	0.20608
P13667	Protein disulfide-isomerase A4 OS=Homo sapiens GN=PDIA4 PE=1 SV=2 - [PDIA4_HUMAN]	16.12	10	10	13	645	72.887	5.07178	1.00894	1.0089	1.27935	1.09906	1.07158	1.00599	1.12706	1.06821	1.02888	0.765643
Q92859	Neogenin OS=Homo sapiens GN=NEO1 PE=1 SV=2 - [NEO1_HUMAN]	4.11	5	5	10	1461	159.917	6.53662	1.16615	0.981722	0.94107	1.02965	0.969012	1.00579	0.948287	0.974364	1.05674	0.481208
P40197	Platelet glycoprotein V OS=Homo sapiens GN=GP5 PE=1 SV=1 - [GPV_HUMAN]	10	5	5	8	560	60.9207	9.62744	0.779167	1.19027	1.15851	1.04265	1.01674	1.09523	0.985377	1.03245	1.00988	0.943819
B4E2S7	cDNA FLJ58780, highly similar to Homo sapiens lysosomal-associated membrane protein 2 (LAMP2), transcript variant LAMP2B, mRNA OS=Homo sapiens PE=2 SV=1 - [B4E2S7_HUMAN]	10.19	4	4	7	363	39.7868	5.66846	1.11694	1.03594	0.866193	1.00636	1.02091	1.00471	1.00759	1.01107	0.995342	0.952341
B4DEW5	cDNA FLJ54049, highly similar to Multimerin-2 OS=Homo sapiens PE=2 SV=1 - [B4DEW5_HUMAN]	2.89	2	2	3	727	79.9884	5.74463	1.09448	1.20412	0.76354	1.02071	1.00569	0.931084	0.927151	0.954643	1.06921	0.649875
P61626	Lysozyme C OS=Homo sapiens GN=LYZ PE=1 SV=1 - [LYSC_HUMAN]	28.38	5	5	23	148	16.5263	9.15869	0.82275	0.87473	0.763229	0.820236	1.00633	0.99783	0.843954	0.949373	0.863977	0.104967
H0YLI6	Isocitrate dehydrogenase [NAD] subunit alpha, mitochondrial (Fragment) OS=Homo sapiens GN=IDH3A PE=1 SV=1 - [H0YLI6_HUMAN]	4.48	1	1	8	134	14.7997	8.104	0.897554	0.324451	0.615988	0.612664	0.859003	5.34671	0.366995	2.1909	0.27964	0.37787
C9JGI3	Thymidine phosphorylase (Fragment) OS=Homo sapiens GN=TYMP PE=1 SV=1 - [C9JGI3_HUMAN]	12.36	4	4	4	445	46.0582	5.51611	1.10298	1.01433	0.998603	1.03864	1.02031	1.03775	1.02566	1.02791	1.01044	0.76064
A8K061	cDNA FLJ77880, highly similar to Homo sapiens angiopoietin-like 3, mRNA OS=Homo sapiens PE=2 SV=1 - [A8K061_HUMAN]	15.65	6	6	7	460	53.6052	6.59521	1.22005	0.960166	1.03904	1.07309	0.910418	0.989204	1.02178	0.973801	1.10196	0.301342
P43487	Ran-specific GTPase-activating protein OS=Homo sapiens GN=RANBP1 PE=1 SV=1 - [RANG_HUMAN]	15.42	3	3	5	201	23.2956	5.2876	0.945601	1.09692	1.22273	1.08842	1.05358	0.971221	1.12649	1.05043	1.03616	0.700285
B4DQ98	cDNA FLJ55135, highly similar to Di-N-acetylchitobiase (EC 3.2.1.-) OS=Homo sapiens PE=2 SV=1 - [B4DQ98_HUMAN]	21.2	7	7	10	382	43.4054	6.44287	1.12491	1.08267	0.973669	1.06042	0.956561	0.883357	1.03097	0.956963	1.10811	0.170596
A0A0S2Z4N8	Vasodilator-stimulated phosphoprotein isoform 2 (Fragment) OS=Homo sapiens GN=VASP PE=2 SV=1 - [A0A0S2Z4N8_HUMAN]	24.09	8	8	13	328	35.4058	8.93896	0.865671	1.01192	1.49352	1.1237	1.01208	0.887212	1.2381	1.0458	1.07449	0.736225
M0R192	Flavin reductase (NADPH) OS=Homo sapiens GN=BLVRB PE=1 SV=1 - [M0R192_HUMAN]	22.7	4	4	6	163	17.1497	6.78564	0.965655	1.06561	1.00716	1.01281	1.0713	0.857819	0.870296	0.933137	1.08538	0.348004
Q9Y509	VH3 protein (Fragment) OS=Homo sapiens GN=VH3 PE=2 SV=1 - [Q9Y509_HUMAN]	15.65	1	2	5	147	15.7587	8.38232	0.537154	0.822245	0.387428	0.582276	0.730651	2.98185	0.815657	1.50939	0.38577	0.282708
Q5NV92	V5-6 protein (Fragment) OS=Homo sapiens GN=V5-6 PE=4 SV=1 - [Q5NV92_HUMAN]	10.1	1	1	4	99	10.567	6.26514	0.301022	0.0921245	0.132018	0.175055	1.07077	2.75801	0.188757	1.33918	0.130718	0.198648
B3KNN9	cDNA FLJ30070 fis, clone ASTRO2000046, highly similar to CD166 ANTIGEN OS=Homo sapiens PE=2 SV=1 - [B3KNN9_HUMAN]	13.15	6	6	12	555	61.9015	6.18896	1.14698	1.04141	0.923664	1.03735	0.969898	0.988106	0.953799	0.970601	1.06877	0.364183
P03950	Angiogenin OS=Homo sapiens GN=ANG PE=1 SV=1 - [ANGI_HUMAN]	37.41	6	6	18	147	16.5394	9.64209	1.16749	0.977961	1.06566	1.07037	0.917864	0.842694	1.12003	0.960196	1.11474	0.32934
H7C457	Collagen alpha-1(XVIII) chain (Fragment) OS=Homo sapiens GN=COL18A1 PE=1 SV=1 - [H7C457_HUMAN]	14.29	4	4	6	280	31.0078	9.40771	1.01491	0.881217	0.975358	0.95716	0.855099	1.01625	0.883577	0.918309	1.04231	0.573983
A0A0A0MSN4	Angiotensin-converting enzyme OS=Homo sapiens GN=ACE PE=1 SV=1 - [A0A0A0MSN4_HUMAN]	5.8	7	7	7	1242	142.33	6.22705	1.21968	1.19422	0.969676	1.12786	0.897262	0.877547	0.985088	0.919965	1.22598	0.0730493
U5YKD2	MHC class I antigen (Fragment) OS=Homo sapiens GN=HLA-A PE=3 SV=1 - [U5YKD2_HUMAN]	10.98	3	3	5	337	37.9108	6.32861	1.05494	0.885879	0.888571	0.943129	1.08634	1.05512	0.923354	1.02161	0.923182	0.354282
P24592	Insulin-like growth factor-binding protein 6 OS=Homo sapiens GN=IGFBP6 PE=1 SV=1 - [IBP6_HUMAN]	12.08	3	3	9	240	25.3062	7.81104	1.04714	0.801279	1.02124	0.956553	0.94143	0.975783	0.874015	0.930409	1.0281	0.769924
A0JNT2	KRT83 protein OS=Homo sapiens GN=KRT83 PE=2 SV=1 - [A0JNT2_HUMAN]	15.21	3	7	7	447	49.6095	5.38916	0.60742	0.57186	0.740074	0.639785	0.545304	0.629065	0.713715	0.629361	1.01656	0.889759
P55290	Cadherin-13 OS=Homo sapiens GN=CDH13 PE=1 SV=1 - [CAD13_HUMAN]	9.12	6	6	11	713	78.2379	4.98291	1.18046	1.0711	0.908587	1.05338	0.928976	1.029	1.00112	0.986366	1.06794	0.471707
P48426	Phosphatidylinositol 5-phosphate 4-kinase type-2 alpha OS=Homo sapiens GN=PIP4K2A PE=1 SV=2 - [PI42A_HUMAN]	12.07	5	5	7	406	46.1955	6.99072	0.988301	1.03807	1.26532	1.09723	1.07418	0.890418	1.07741	1.014	1.08208	0.473542
Q99969	Retinoic acid receptor responder protein 2 OS=Homo sapiens GN=RARRES2 PE=1 SV=1 - [RARR2_HUMAN]	21.47	3	3	9	163	18.6058	9.08545	1.00906	0.957833	1.01714	0.994676	0.86079	1.13341	0.908583	0.967594	1.02799	0.768766
A0A0C4DH29	Immunoglobulin heavy variable 1-3 OS=Homo sapiens GN=IGHV1-3 PE=3 SV=1 - [HV103_HUMAN]	28.21	2	3	8	117	12.9994	9.5542	0.630342	0.428985	0.401404	0.48691	0.928896	2.44471	0.520833	1.29815	0.375081	0.240923
C9J0J0	Coiled-coil domain-containing protein 126 (Fragment) OS=Homo sapiens GN=CCDC126 PE=1 SV=8 - [C9J0J0_HUMAN]	10.91	1	1	5	110	12.7029	9.48096	1.10485	1.0663	1.04423	1.07179	0.972575	1.05097	0.970344	0.997964	1.07398	0.0815464
B4E367	cDNA FLJ61564, highly similar to Plexin domain-containing protein 2 OS=Homo sapiens PE=2 SV=1 - [B4E367_HUMAN]	11.26	6	6	8	515	58.1468	6.3667	1.23207	1.07438	1.07114	1.12587	0.8707	0.885685	1.26739	1.00793	1.11701	0.447717
A4UCT0	Fructose-bisphosphate aldolase (Fragment) OS=Homo sapiens PE=2 SV=1 - [A4UCT0_HUMAN]	40.98	1	4	9	122	13.3938	6.771	0.901	0.98684	1.09978	0.995874	1.09595	1.1608	0.905855	1.0542	0.944673	0.575271
P08758	Annexin A5 OS=Homo sapiens GN=ANXA5 PE=1 SV=2 - [ANXA5_HUMAN]	16.88	4	5	9	320	35.9144	5.04639	1.04932	0.973661	1.26832	1.0971	1.10203	0.970848	1.13362	1.06883	1.02645	0.794291
A8K0T9	cDNA FLJ75422, highly similar to Homo sapiens capping protein (actin filament) muscle Z-line, alpha 1, mRNA OS=Homo sapiens PE=2 SV=1 - [A8K0T9_HUMAN]	15.03	2	3	4	286	32.8883	5.69385	0.993032	0.990612	1.23358	1.07241	1.01876	0.930604	1.18667	1.04534	1.02589	0.818019
V9HW35	Epididymis secretory protein Li 55 OS=Homo sapiens GN=HEL-S-55 PE=2 SV=1 - [V9HW35_HUMAN]	19.14	2	2	3	162	17.02	7.23975	0.887699	1.00312	1.06763	0.986149	1.03934	1.30955	1.13165	1.16018	0.849997	0.141463
Q8N294	cDNA FLJ33633 fis, clone BRAMY2022786, highly similar to Homo sapiens dickkopf-3 (DKK-3) mRNA OS=Homo sapiens PE=2 SV=1 - [Q8N294_HUMAN]	20	3	3	4	215	23.889	4.67822	1.35973	0.963384	0.932679	1.08526	0.98472	0.931597	1.07494	0.997085	1.08844	0.572745
Q5JY90	Tyrosine-protein kinase OS=Homo sapiens GN=BTK PE=1 SV=1 - [Q5JY90_HUMAN]	4.35	2	2	3	483	55.8452	8.03076	0.961045	1.08264	1.0581	1.03393	1.00629	1.08024	1.07605	1.05419	0.980776	0.670367
B7Z3I9	Delta-aminolevulinic acid dehydratase OS=Homo sapiens PE=2 SV=1 - [B7Z3I9_HUMAN]	9.27	2	2	3	313	34.4975	7.1958	1.05526	0.892614	0.971387	0.973086	1.0854	0.915008	1.09833	1.03291	0.942079	0.472256
B4DHN0	Mitogen-activated protein kinase OS=Homo sapiens PE=2 SV=1 - [B4DHN0_HUMAN]	2.01	1	1	8	348	40.3948	7.15186	1.09157	0.937985	0.86172	0.963759	1.06745	0.987746	0.935742	0.99698	0.966679	0.690952
A0A087X0S5	Collagen alpha-1(VI) chain OS=Homo sapiens GN=COL6A1 PE=1 SV=1 - [A0A087X0S5_HUMAN]	4	3	3	7	1026	108.272	5.42725	1.14402	1.06908	0.882852	1.03199	0.956623	1.01246	1.14866	1.03925	0.993014	0.943543
B1ALC0	Actin-related protein 2/3 complex subunit 5 OS=Homo sapiens GN=ARPC5 PE=1 SV=1 - [B1ALC0_HUMAN]	33.33	5	5	8	135	14.7984	5.05908	0.926016	1.04229	1.14051	1.03627	1.13133	0.959262	1.22021	1.1036	0.938991	0.53195
I3L397	Eukaryotic translation initiation factor 5A (Fragment) OS=Homo sapiens GN=EIF5A PE=1 SV=8 - [I3L397_HUMAN]	19.18	3	3	5	146	16.0089	4.99561	0.947232	1.00929	1.09044	1.01565	1.12271	0.939046	1.09061	1.05079	0.966565	0.642973
Q59EY4	CDC10 protein variant (Fragment) OS=Homo sapiens PE=2 SV=1 - [Q59EY4_HUMAN]	17.32	5	6	8	381	43.7986	7.78174	1.06781	1.02095	1.19712	1.09529	1.03255	1.06674	1.18017	1.09315	1.00195	0.976788
A0A125QYY4	GCT-A7 heavy chain variable region (Fragment) OS=Homo sapiens PE=2 SV=1 - [A0A125QYY4_HUMAN]	26.89	1	3	6	119	13.1483	7.94287	0.5828	0.27155	0.351676	0.402009	0.818172	2.98642	0.399719	1.40144	0.286855	0.283292
Q7Z7M4	Superoxide dismutase (Fragment) OS=Homo sapiens GN=SOD2 PE=2 SV=1 - [Q7Z7M4_HUMAN]	23.94	4	4	6	213	23.658	7.31299	1.02161	0.969013	1.04179	1.0108	1.04455	1.26259	1.03026	1.11247	0.908613	0.263644
Q2Q9B7	Glucose-6-phosphate 1-dehydrogenase (Fragment) OS=Homo sapiens GN=G6PD PE=3 SV=1 - [Q2Q9B7_HUMAN]	14.53	6	6	7	475	54.8218	7.07861	0.966048	1.05243	1.25957	1.09268	1.1082	1.00152	1.08259	1.0641	1.02686	0.77358
P08253	72 kDa type IV collagenase OS=Homo sapiens GN=MMP2 PE=1 SV=2 - [MMP2_HUMAN]	18.79	12	12	15	660	73.8347	5.46533	1.18966	1.0197	0.914121	1.04116	0.923759	0.967619	0.950823	0.9474	1.09897	0.312879
Q13822	Ectonucleotide pyrophosphatase/phosphodiesterase family member 2 OS=Homo sapiens GN=ENPP2 PE=1 SV=3 - [ENPP2_HUMAN]	9.5	7	7	11	863	98.9296	7.37158	1.23821	1.03601	1.04477	1.10633	0.953534	0.91902	0.998075	0.956876	1.15619	0.0991102
P54289	Voltage-dependent calcium channel subunit alpha-2/delta-1 OS=Homo sapiens GN=CACNA2D1 PE=1 SV=3 - [CA2D1_HUMAN]	11.33	9	9	10	1103	124.49	5.2749	1.16365	1.03925	0.870536	1.02448	1.00489	1.03018	1.13948	1.05818	0.968148	0.739215
P25787	Proteasome subunit alpha type-2 OS=Homo sapiens GN=PSMA2 PE=1 SV=2 - [PSA2_HUMAN]	11.11	2	2	3	234	25.8823	7.43018	1.03711	1.07417	0.959959	1.02375	1.06266	1.0645	1.09326	1.07347	0.953679	0.229197
P17174	Aspartate aminotransferase, cytoplasmic OS=Homo sapiens GN=GOT1 PE=1 SV=3 - [AATC_HUMAN]	8.23	3	3	3	413	46.2185	7.00537	0.95957	0.990517	0.995882	0.98199	0.950249	1.25102	1.00528	1.06885	0.918735	0.403886
B4E190	cDNA FLJ57770, moderately similar to ADP-ribosylation factor 3 OS=Homo sapiens PE=2 SV=1 - [B4E190_HUMAN]	12.5	2	2	3	144	16.1485	7.34229	0.953155	1.03451	1.36271	1.11679	1.15186	0.927415	1.10724	1.06217	1.05142	0.721446
P80188	Neutrophil gelatinase-associated lipocalin OS=Homo sapiens GN=LCN2 PE=1 SV=2 - [NGAL_HUMAN]	16.16	2	2	4	198	22.5737	8.90967	0.942427	1.02452	0.985388	0.98411	0.961956	0.933771	0.998893	0.964873	1.01994	0.559882
Q5NV88	V1-22 protein (Fragment) OS=Homo sapiens GN=V1-22 PE=1 SV=1 - [Q5NV88_HUMAN]	28.57	1	2	6	98	10.6369	4.77979	0.433806	0.37725	0.372101	0.394386	0.771871	3.80674	0.411028	1.66321	0.237123	0.304052
A0A087X0T8	Cell adhesion molecule 1 OS=Homo sapiens GN=CADM1 PE=1 SV=1 - [A0A087X0T8_HUMAN]	14.16	3	3	3	346	38.7555	5.43994	1.18435	0.93345	0.968203	1.02867	0.980126	0.993274	1.00958	0.994325	1.03454	0.685998
Q15323	Keratin, type I cuticular Ha1 OS=Homo sapiens GN=KRT31 PE=1 SV=3 - [K1H1_HUMAN]	14.66	5	6	7	416	47.2071	4.88135	0.668861	0.704202	0.656188	0.676417	0.594785	0.931062	0.680175	0.735341	0.919869	0.594213
B4DDZ4	Annexin OS=Homo sapiens PE=2 SV=1 - [B4DDZ4_HUMAN]	10.03	2	3	5	299	33.5928	5.85889	1.00339	0.991736	1.40775	1.13429	1.04638	0.95077	1.20044	1.06586	1.0642	0.681511
Q2HZY9	Coagulation factor V (Fragment) OS=Homo sapiens PE=4 SV=1 - [Q2HZY9_HUMAN]	70	1	5	12	70	8.37021	8.71924	1.6838	1.49387	0.786201	1.32129	0.480106	0.852398	1.02993	0.787477	1.67787	0.168041
Q15555	Microtubule-associated protein RP/EB family member 2 OS=Homo sapiens GN=MAPRE2 PE=1 SV=1 - [MARE2_HUMAN]	15.9	4	5	13	327	37.0082	5.56689	0.949529	1.08311	1.56753	1.20005	1.01455	0.94172	1.1401	1.03212	1.1627	0.44088
P08637	Low affinity immunoglobulin gamma Fc region receptor III-A OS=Homo sapiens GN=FCGR3A PE=1 SV=2 - [FCG3A_HUMAN]	19.29	2	6	20	254	29.0707	8.07471	1.33645	1.12502	0.699243	1.05357	0.934002	0.812077	0.893382	0.87982	1.19749	0.413949
A2MYC8	V5-2 protein (Fragment) OS=Homo sapiens GN=V5-2 PE=4 SV=1 - [A2MYC8_HUMAN]	19.23	2	2	3	104	11.0344	7.28369	0.581482	0.678507	0.359629	0.539872	0.844863	2.20374	0.448621	1.16574	0.463115	0.310747
Q15819	Ubiquitin-conjugating enzyme E2 variant 2 OS=Homo sapiens GN=UBE2V2 PE=1 SV=4 - [UB2V2_HUMAN]	11.72	2	2	4	145	16.3522	8.08936	0.91701	1.0339	1.57223	1.17438	1.03678	0.928481	1.14854	1.03793	1.13146	0.554035
O14498	Immunoglobulin superfamily containing leucine-rich repeat protein OS=Homo sapiens GN=ISLR PE=2 SV=1 - [ISLR_HUMAN]	3.04	1	1	2	428	45.9684	5.14795	1.06643	0.875322	0.778201	0.90665	1.08242	1.14017	0.908306	1.04363	0.868745	0.279706
P55145	Mesencephalic astrocyte-derived neurotrophic factor OS=Homo sapiens GN=MANF PE=1 SV=3 - [MANF_HUMAN]	15.93	3	3	5	182	20.6868	8.68994	0.936326	1.01399	1.57783	1.17605	0.964915	0.985198	1.17016	1.04009	1.13072	0.556973
H0YD65	Cathepsin F (Fragment) OS=Homo sapiens GN=CTSF PE=1 SV=8 - [H0YD65_HUMAN]	6.74	2	2	4	282	31.7847	7.29834	1.16286	1.00083	1.03589	1.06653	0.957945	0.860924	0.992392	0.937087	1.13813	0.109196
A0A0A0MT36	Immunoglobulin kappa variable 6D-21 OS=Homo sapiens GN=IGKV6D-21 PE=3 SV=1 - [KVD21_HUMAN]	10.53	1	1	2	114	12.3322	7.28369	0.440463	0.447147	0.497202	0.461604	1.14129	1.92073	0.421036	1.16102	0.397585	0.181878
Q59F24	Vascular endothelial growth factor receptor 3 variant (Fragment) OS=Homo sapiens PE=2 SV=1 - [Q59F24_HUMAN]	8.32	3	3	3	649	71.6882	6.66846	1.03489	1.11834	0.910033	1.02109	0.981138	1.076	1.05158	1.03624	0.985381	0.831902
Q86UD1	Out at first protein homolog OS=Homo sapiens GN=OAF PE=2 SV=1 - [OAF_HUMAN]	17.95	4	4	4	273	30.6686	6.84424	1.20991	1.07	0.8836	1.0545	0.890516	0.756617	0.97736	0.874831	1.20538	0.190941
Q53H37	Calmodulin-like skin protein variant (Fragment) OS=Homo sapiens PE=2 SV=1 - [Q53H37_HUMAN]	8.9	1	1	1	146	15.8667	4.43701	1.21532	1.11114	1.15006	1.15884	0.742876	0.927798	1.06674	0.912472	1.27	0.0668755
P00568	Adenylate kinase isoenzyme 1 OS=Homo sapiens GN=AK1 PE=1 SV=3 - [KAD1_HUMAN]	23.2	4	4	5	194	21.6213	8.63135	0.8942	1.07142	1.05719	1.0076	1.04915	0.938631	1.08687	1.02488	0.983139	0.822557
Q14554	Protein disulfide-isomerase A5 OS=Homo sapiens GN=PDIA5 PE=1 SV=1 - [PDIA5_HUMAN]	4.24	2	2	2	519	59.5561	7.91357	0.927455	1.27891	1.44451	1.21696	0.940109	1.06734	1.28549	1.09765	1.1087	0.549523
Q8IXL6	Extracellular serine/threonine protein kinase FAM20C OS=Homo sapiens GN=FAM20C PE=1 SV=2 - [FA20C_HUMAN]	6.51	3	3	5	584	66.1925	7.73779	1.00712	1.10615	0.985726	1.033	0.952005	1.02118	0.959133	0.97744	1.05684	0.266948
P68366	Tubulin alpha-4A chain OS=Homo sapiens GN=TUBA4A PE=1 SV=1 - [TBA4A_HUMAN]	15.4	1	6	10	448	49.8924	5.05908	0.901391	0.955436	1.77819	1.21167	1.06713	0.504462	1.6321	1.0679	1.13463	0.755873
A2J1M8	Rheumatoid factor RF-IP12 (Fragment) OS=Homo sapiens PE=2 SV=1 - [A2J1M8_HUMAN]	32.63	2	3	10	95	10.6781	7.98682	0.684997	0.458493	0.48404	0.54251	1.08679	2.17102	0.581127	1.27964	0.423954	0.195207
Q8IZD8	Anti-thyroglobulin light chain variable region (Fragment) OS=Homo sapiens PE=2 SV=1 - [Q8IZD8_HUMAN]	21.78	1	2	4	101	10.3681	5.90967	0.372372	0.0834027	0.177981	0.211252	1.17072	2.4596	0.377695	1.33601	0.158122	0.140234
P48637	Glutathione synthetase OS=Homo sapiens GN=GSS PE=1 SV=1 - [GSHB_HUMAN]	13.71	8	8	10	474	52.3523	5.92236	1.04651	1.00767	1.09385	1.04934	1.02657	1.03454	1.04769	1.03626	1.01262	0.637275
A0A024R412	Neuropilin OS=Homo sapiens GN=NRP2 PE=1 SV=1 - [A0A024R412_HUMAN]	7.1	6	6	6	901	101.317	5.64307	1.12495	0.975301	0.999574	1.03328	0.958039	1.1329	1.02149	1.03748	0.99595	0.954369
F5H5I5	ATP-binding cassette sub-family B member 9 (Fragment) OS=Homo sapiens GN=ABCB9 PE=4 SV=1 - [F5H5I5_HUMAN]	10.77	1	1	6	65	7.43285	6.49365	1.096	0.835708	0.85407	0.928591	0.995972	1.26607	0.755923	1.00599	0.923065	0.67173
A8K4W8	cDNA FLJ77917, highly similar to Homo sapiens ubiquitin-conjugating enzyme E2L 3 (UBE2L3), transcript variant 1, mRNA OS=Homo sapiens PE=2 SV=1 - [A8K4W8_HUMAN]	29.87	3	4	15	154	17.7782	8.74854	0.854476	0.984617	1.37917	1.07275	1.15806	1.02411	1.14341	1.10853	0.967726	0.83736
Q15185	Prostaglandin E synthase 3 OS=Homo sapiens GN=PTGES3 PE=1 SV=1 - [TEBP_HUMAN]	16.88	2	2	3	160	18.6854	4.53857	1.00236	0.975652	1.31103	1.09635	1.10784	0.912439	1.20804	1.07611	1.01881	0.890686
P59998	Actin-related protein 2/3 complex subunit 4 OS=Homo sapiens GN=ARPC4 PE=1 SV=3 - [ARPC4_HUMAN]	25.6	5	5	9	168	19.6543	8.42627	0.955569	1.09728	1.26513	1.10599	1.05447	0.83743	1.20692	1.03294	1.07072	0.628483
B2RBW9	cDNA, FLJ95746, highly similar to Homo sapiens inhibin, beta C (INHBC), mRNA OS=Homo sapiens PE=2 SV=1 - [B2RBW9_HUMAN]	10.23	3	3	5	352	38.2014	7.10791	1.20761	1.08116	0.972001	1.08692	0.956739	0.884687	1.0092	0.950207	1.14388	0.150672
O15143	Actin-related protein 2/3 complex subunit 1B OS=Homo sapiens GN=ARPC1B PE=1 SV=3 - [ARC1B_HUMAN]	10.22	5	5	10	372	40.9234	8.35303	1.00759	1.04028	1.18737	1.07841	1.06158	0.982625	1.11259	1.05227	1.02485	0.716153
A0A087WZR4	Low affinity immunoglobulin gamma Fc region receptor III-B OS=Homo sapiens GN=FCGR3B PE=1 SV=1 - [A0A087WZR4_HUMAN]	24.54	2	6	19	216	24.4062	6.7124	1.19146	0.750728	0.666054	0.869412	0.895627	1.03519	0.82942	0.920079	0.944932	0.785132
P13727	Bone marrow proteoglycan OS=Homo sapiens GN=PRG2 PE=1 SV=2 - [PRG2_HUMAN]	4.5	1	1	3	222	25.1893	6.75635	0.93498	0.782316	1.04408	0.920457	1.00996	1.05783	0.813434	0.960408	0.958403	0.726744
A0A024RC87	Ribonuclease/angiogenin inhibitor 1, isoform CRA_a OS=Homo sapiens GN=RNH1 PE=4 SV=1 - [A0A024RC87_HUMAN]	10.53	4	4	4	456	49.3848	4.84326	1.06794	0.953602	1.15128	1.05761	1.05832	0.997044	0.981404	1.01226	1.0448	0.504505
Q9H7V3	cDNA FLJ14219 fis, clone NT2RP3003800, highly similar to Rattus norvegicus tyrosine protein kinase pp60-c-src mRNA OS=Homo sapiens PE=2 SV=1 - [Q9H7V3_HUMAN]	8.37	2	2	3	251	28.7025	5.73193	0.833645	1.11684	1.33884	1.09644	0.866856	1.20164	1.12599	1.06483	1.02969	0.867595
F6RFD5	Destrin OS=Homo sapiens GN=DSTN PE=1 SV=1 - [F6RFD5_HUMAN]	20	2	3	4	135	15.3869	8.5874	0.820755	1.03136	1.3643	1.07214	1.06547	0.930008	1.18763	1.06103	1.01047	0.9524
A0A0F7T6Q1	IGHV1-2 protein (Fragment) OS=Homo sapiens GN=IGHV1-2 PE=4 SV=1 - [A0A0F7T6Q1_HUMAN]	29.52	2	3	7	105	11.9037	9.29053	0.744778	0.550132	0.585254	0.626721	0.793036	2.73157	0.610937	1.37851	0.454636	0.331683
A0A109PSY4	MS-A1 light chain variable region (Fragment) OS=Homo sapiens PE=2 SV=1 - [A0A109PSY4_HUMAN]	32.08	2	2	3	106	11.3687	8.48486	0.689169	0.577543	0.208915	0.491876	0.764764	2.43586	0.508266	1.2363	0.397863	0.297131
D6RFG5	Annexin (Fragment) OS=Homo sapiens GN=ANXA3 PE=1 SV=1 - [D6RFG5_HUMAN]	16.88	2	2	2	154	17.1348	7.48877	0.988997	1.00015	1.2266	1.07192	1.0223	1.00346	1.07419	1.03332	1.03735	0.655638
Q15746	Myosin light chain kinase, smooth muscle OS=Homo sapiens GN=MYLK PE=1 SV=4 - [MYLK_HUMAN]	2.51	3	5	6	1914	210.583	6.15088	0.908229	0.979768	1.50068	1.12956	1.04875	0.972684	1.11306	1.04483	1.08109	0.680361
B4E324	cDNA FLJ60397, highly similar to Lysosomal protective protein (EC 3.4.16.5) OS=Homo sapiens PE=2 SV=1 - [B4E324_HUMAN]	6.88	3	3	4	480	54.235	6.97607	1.02352	1.11671	1.16896	1.10307	0.954802	0.918277	1.18533	1.01947	1.082	0.423157
B4DFW2	Metalloproteinase inhibitor 2 OS=Homo sapiens GN=TIMP2 PE=1 SV=1 - [B4DFW2_HUMAN]	6.29	1	1	1	143	16.0707	6.30322	1.19883	1.029	1.02969	1.08584	0.860702	0.883347	1.06591	0.936651	1.15928	0.158124
P61088	Ubiquitin-conjugating enzyme E2 N OS=Homo sapiens GN=UBE2N PE=1 SV=1 - [UBE2N_HUMAN]	19.08	3	3	5	152	17.127	6.56592	0.998053	1.06748	1.24215	1.10256	0.986022	0.980812	0.990195	0.985676	1.11858	0.183003
Q53QE9	Uncharacterized protein UGP2 (Fragment) OS=Homo sapiens GN=UGP2 PE=4 SV=1 - [Q53QE9_HUMAN]	11.42	5	5	7	438	49.1906	8.68994	0.905601	0.906744	1.16845	0.993599	1.04028	1.11239	1.06005	1.07091	0.927811	0.438946
F5GX11	Proteasome endopeptidase complex OS=Homo sapiens GN=PSMA1 PE=1 SV=1 - [F5GX11_HUMAN]	11.34	3	3	3	238	26.4884	6.72705	1.14125	1.14139	1.01543	1.09935	1.01856	0.961902	1.05953	1.01333	1.08489	0.164459
B2R7P8	cDNA, FLJ93545, highly similar to Homo sapiens 5-aminoimidazole-4-carboxamide ribonucleotide formyltransferase/IMP cyclohydrolase (ATIC), mRNA OS=Homo sapiens PE=2 SV=1 - [B2R7P8_HUMAN]	5.41	3	3	3	592	64.5944	6.80029	0.871944	1.0568	1.20356	1.0441	1.23974	0.861366	1.11581	1.07231	0.973696	0.857181
O95497	Pantetheinase OS=Homo sapiens GN=VNN1 PE=1 SV=2 - [VNN1_HUMAN]	17.74	8	8	10	513	56.9751	5.5542	1.23967	1.04938	0.970431	1.08649	0.869401	1.12087	0.894007	0.961425	1.13009	0.330824
P80723	Brain acid soluble protein 1 OS=Homo sapiens GN=BASP1 PE=1 SV=2 - [BASP1_HUMAN]	11.89	2	2	4	227	22.68	4.62744	1.20982	1.24575	1.21068	1.22209	0.792257	1.10751	1.1885	1.02942	1.18716	0.187825
O15144	Actin-related protein 2/3 complex subunit 2 OS=Homo sapiens GN=ARPC2 PE=1 SV=1 - [ARPC2_HUMAN]	20	6	6	11	300	34.3115	7.35693	1.01867	1.04143	1.22699	1.0957	1.04972	0.894048	1.17049	1.03808	1.0555	0.608115
P09382	Galectin-1 OS=Homo sapiens GN=LGALS1 PE=1 SV=2 - [LEG1_HUMAN]	19.26	3	3	4	135	14.7062	5.50342	1.17323	1.09625	0.94981	1.0731	0.913868	0.89874	0.971233	0.927947	1.15642	0.103752
O75368	SH3 domain-binding glutamic acid-rich-like protein OS=Homo sapiens GN=SH3BGRL PE=1 SV=1 - [SH3L1_HUMAN]	35.09	5	5	7	114	12.7664	5.24951	0.918709	0.886158	1.33598	1.04695	1.07961	0.925519	1.05484	1.01999	1.02643	0.868274
H3BMH2	Ras-related protein Rab-11A (Fragment) OS=Homo sapiens GN=RAB11A PE=4 SV=1 - [H3BMH2_HUMAN]	11.61	2	2	4	155	17.6571	8.33838	0.864388	0.819883	1.51685	1.06704	0.98639	0.831437	1.23383	1.01722	1.04898	0.854019
A2MYD6	V1-2 protein (Fragment) OS=Homo sapiens GN=V1-2 PE=4 SV=1 - [A2MYD6_HUMAN]	16.16	1	2	8	99	10.3468	5.90967	0.614925	0.522781	0.419064	0.518924	1.12013	2.25124	0.45935	1.27691	0.406391	0.223181
U3KQE2	Calpain small subunit 1 (Fragment) OS=Homo sapiens GN=CAPNS1 PE=1 SV=1 - [U3KQE2_HUMAN]	24.84	3	3	3	161	18.4337	4.91943	0.842355	0.94711	1.2885	1.02599	1.27586	0.887561	0.970176	1.04453	0.982245	0.922528
F5H810	Noelin (Fragment) OS=Homo sapiens GN=OLFM1 PE=1 SV=1 - [F5H810_HUMAN]	21.15	4	4	10	208	24.206	6.41748	1.13838	1.10701	0.922961	1.05612	0.915114	0.930778	0.998251	0.948048	1.11399	0.207092
E5RIW3	Tubulin-specific chaperone A OS=Homo sapiens GN=TBCA PE=1 SV=1 - [E5RIW3_HUMAN]	25	3	3	3	84	10.074	4.62744	0.977744	1.02343	1.2898	1.09699	1.10576	1.11081	1.1946	1.13706	0.964764	0.713124
Q59H37	Laminin alpha 2 subunit variant (Fragment) OS=Homo sapiens PE=2 SV=1 - [Q59H37_HUMAN]	1.51	3	3	3	1853	204.43	6.37939	1.2167	0.935229	1.00307	1.05167	0.913991	0.848449	0.988067	0.916836	1.14706	0.224404
Q92686	Neurogranin OS=Homo sapiens GN=NRGN PE=1 SV=1 - [NEUG_HUMAN]	19.23	1	1	2	78	7.61366	7.86963	0.809546	1.17256	0.912358	0.964821	1.05448	1.15748	1.05973	1.09057	0.884698	0.328539
A0A024RCB5	Chitinase domain containing 1, isoform CRA_a OS=Homo sapiens GN=CHID1 PE=4 SV=1 - [A0A024RCB5_HUMAN]	3.63	1	1	1	386	44.0898	7.69385	1.0125	1.10556	1.174	1.09735	1.06324	0.919489	1.12325	1.03533	1.05991	0.462726
Q7RTS7	Keratin, type II cytoskeletal 74 OS=Homo sapiens GN=KRT74 PE=1 SV=2 - [K2C74_HUMAN]	5.1	1	3	10	529	57.8296	7.7085	1.36161	1.26719	0.946072	1.19162	0.867035	0.737898	1.08834	0.897757	1.32733	0.144125
A1L4H1	Soluble scavenger receptor cysteine-rich domain-containing protein SSC5D OS=Homo sapiens GN=SSC5D PE=1 SV=3 - [SRCRL_HUMAN]	2.99	3	3	3	1573	165.639	6.12549	1.02715	0.86832	0.915959	0.937144	1.06215	0.965598	0.903689	0.977147	0.959061	0.576503
F6VDH7	Hsc70-interacting protein (Fragment) OS=Homo sapiens GN=ST13 PE=1 SV=1 - [F6VDH7_HUMAN]	19.14	3	3	3	162	18.074	4.77979	0.936364	0.98133	1.11063	1.00944	1.07197	0.985331	1.11399	1.0571	0.954917	0.501126
A0A075B6R9	Immunoglobulin kappa variable 2D-24 (non-functional) (Fragment) OS=Homo sapiens GN=IGKV2D-24 PE=4 SV=1 - [A0A075B6R9_HUMAN]	10.83	1	1	2	120	13.0707	8.86572	0.431841	0.19219	0.402009	0.342013	0.892251	2.56875	0.294195	1.25173	0.273232	0.254829
A0A0X9V9B3	MS-F1 light chain variable region (Fragment) OS=Homo sapiens PE=2 SV=1 - [A0A0X9V9B3_HUMAN]	11.61	1	1	3	112	12.1	5.96045	0.601922	0.504978	0.619856	0.575585	1.23228	1.91219	0.617754	1.25407	0.458973	0.145094
Q9UJC5	SH3 domain-binding glutamic acid-rich-like protein 2 OS=Homo sapiens GN=SH3BGRL2 PE=1 SV=2 - [SH3L2_HUMAN]	24.3	2	2	3	107	12.3182	6.7124	0.90546	1.02118	1.35226	1.09297	1.17206	0.913112	1.18315	1.08944	1.00324	0.983504
O43665	Regulator of G-protein signaling 10 OS=Homo sapiens GN=RGS10 PE=1 SV=2 - [RGS10_HUMAN]	16.18	2	2	2	173	20.223	5.49072	0.944594	1.03173	1.2911	1.08914	1.05784	1.06309	1.21093	1.11062	0.980659	0.861551
V9H0D6	Complement C4A3 (Fragment) OS=Homo sapiens GN=C4A PE=4 SV=1 - [V9H0D6_HUMAN]	28.95	1	1	2	38	4.30918	5.0083	0.91577	1.01299	0.667687	0.865483	0.951476	1.16233	0.951505	1.02177	0.847041	0.277794
P28066	Proteasome subunit alpha type-5 OS=Homo sapiens GN=PSMA5 PE=1 SV=3 - [PSA5_HUMAN]	13.28	4	4	5	241	26.3942	4.79248	1.03079	1.07124	1.08511	1.06238	1.05356	1.05714	1.13186	1.08085	0.982907	0.574773
P29350	Tyrosine-protein phosphatase non-receptor type 6 OS=Homo sapiens GN=PTPN6 PE=1 SV=1 - [PTN6_HUMAN]	9.24	5	5	7	595	67.5191	7.78174	0.921738	0.997846	1.28705	1.06888	1.02557	0.980034	1.1955	1.06703	1.00173	0.98928
B7ZAL5	cDNA, FLJ79229, highly similar to Lactotransferrin (EC 3.4.21.-) OS=Homo sapiens PE=2 SV=1 - [B7ZAL5_HUMAN]	7.51	5	5	5	666	73.1232	7.78174	0.901279	1.05235	1.09997	1.01786	0.826869	0.930089	1.07795	0.94497	1.07714	0.482741
A0A024R5A3	Calpain 1, (Mu/I) large subunit, isoform CRA_b OS=Homo sapiens GN=CAPN1 PE=3 SV=1 - [A0A024R5A3_HUMAN]	11.13	8	8	12	710	81.416	5.74463	0.938798	1.04967	1.21607	1.06818	1.13224	0.953289	1.12738	1.07097	0.997397	0.979047
Q9UNH2	MC51L-53L-54L homolog (Fragment) OS=Homo sapiens PE=4 SV=1 - [Q9UNH2_HUMAN]	4.89	1	1	4	184	19.8162	7.34229	1.19195	0.786815	0.97722	0.985328	0.94981	0.933948	0.962297	0.948685	1.03862	0.770371
A8K1D2	cDNA FLJ76601, highly similar to Homo sapiens LIM and SH3 protein 1 (LASP1), mRNA OS=Homo sapiens PE=2 SV=1 - [A8K1D2_HUMAN]	17.62	5	5	6	261	29.6262	7.37158	0.908346	1.01447	1.0603	0.994372	1.08324	1.06461	1.19572	1.11452	0.892195	0.119523
B4DSV9	cDNA FLJ56632, moderately similar to Target of Nesh-SH3 OS=Homo sapiens PE=2 SV=1 - [B4DSV9_HUMAN]	7.68	6	6	7	1029	113.36	9.56885	1.15473	1.02773	0.982965	1.05514	0.995092	0.964159	0.985287	0.981513	1.07502	0.231569
B4DFP1	cDNA FLJ51818, highly similar to Phosphoglucomutase-1 (EC 5.4.2.2) OS=Homo sapiens PE=2 SV=1 - [B4DFP1_HUMAN]	12.83	6	6	6	538	58.702	6.04932	0.897173	1.00261	1.35192	1.0839	1.04086	0.94732	1.17543	1.05454	1.02784	0.856748
B4DSD8	Alpha-1,4 glucan phosphorylase OS=Homo sapiens PE=2 SV=1 - [B4DSD8_HUMAN]	6.52	5	5	5	752	85.7328	6.16357	0.946638	0.952817	1.17835	1.02594	1.17306	0.934009	1.11264	1.07324	0.955927	0.674836
P14543	Nidogen-1 OS=Homo sapiens GN=NID1 PE=1 SV=3 - [NID1_HUMAN]	7.06	7	8	9	1247	136.291	5.2876	1.04496	0.983799	1.06492	1.03123	1.01491	1.0881	0.942603	1.0152	1.01578	0.75808
B4DM33	cDNA FLJ52068, highly similar to Microtubule-associated protein RP/EB family member 1 OS=Homo sapiens PE=2 SV=1 - [B4DM33_HUMAN]	25.63	4	5	6	238	26.5656	5.2876	0.994207	0.968342	1.29797	1.08684	1.0488	0.985729	1.04292	1.02582	1.05949	0.601344
B4DNJ3	Alpha-amylase OS=Homo sapiens PE=2 SV=1 - [B4DNJ3_HUMAN]	4.95	2	2	2	465	53.3209	5.5415	1.01812	0.847806	1.25075	1.03889	1.00764	1.12215	1.11914	1.08298	0.95929	0.737541
Q5H9A7	Metalloproteinase inhibitor 1 OS=Homo sapiens GN=TIMP1 PE=1 SV=1 - [Q5H9A7_HUMAN]	32.87	4	4	8	143	16.0468	8.07471	1.04855	0.955066	1.04671	1.01678	1.00041	0.982883	0.9843	0.989198	1.02788	0.428932
P78386	Keratin, type II cuticular Hb5 OS=Homo sapiens GN=KRT85 PE=1 SV=1 - [KRT85_HUMAN]	9.47	2	6	6	507	55.7665	6.55127	0.631258	0.494816	0.655644	0.593906	0.550612	0.673694	0.540377	0.588228	1.00965	0.935445
H0Y532	Selenium-binding protein 1 (Fragment) OS=Homo sapiens GN=SELENBP1 PE=1 SV=8 - [H0Y532_HUMAN]	15.74	4	4	4	305	33.9019	5.64307	0.984676	0.971998	0.874088	0.943587	0.961404	1.07193	0.898525	0.977287	0.965517	0.613205
B2R5M8	Isocitrate dehydrogenase [NADP] OS=Homo sapiens PE=2 SV=1 - [B2R5M8_HUMAN]	11.35	6	6	7	414	46.6195	7.00537	0.914813	1.01424	1.05623	0.995092	1.03403	1.10589	1.10832	1.08275	0.919045	0.144975
B4DM05	cDNA FLJ51241, highly similar to Nidogen-1 OS=Homo sapiens PE=2 SV=1 - [B4DM05_HUMAN]	2.62	1	2	2	726	79.2832	4.97021	0.829891	1.27833	0.822753	0.97699	0.876931	0.759564	1.27962	0.972037	1.0051	0.982958
A0A0X9UWM4	IBM-A3 heavy chain variable region (Fragment) OS=Homo sapiens PE=2 SV=1 - [A0A0X9UWM4_HUMAN]	9.45	1	1	1	127	14.3599	8.36768	0.72439	0.546017	0.450675	0.573694	1.13416	2.30707	0.665814	1.36902	0.419055	0.183164
Q9UQ80	Proliferation-associated protein 2G4 OS=Homo sapiens GN=PA2G4 PE=1 SV=3 - [PA2G4_HUMAN]	7.36	2	2	3	394	43.7592	6.55127	0.953764	0.9632	1.26586	1.06094	1.0203	0.986552	1.07937	1.02874	1.0313	0.776509
Q1KSF8	XTP3TPA-transactivated protein 1 OS=Homo sapiens GN=XTP3TPATP1 PE=2 SV=1 - [Q1KSF8_HUMAN]	10.1	2	2	2	208	23.6107	6.90283	0.894045	1.16917	1.04405	1.03575	0.995745	0.922815	1.14492	1.02116	1.01429	0.894103
Q9GZP8	Immortalization up-regulated protein OS=Homo sapiens GN=IMUP PE=1 SV=1 - [IMUP_HUMAN]	9.43	1	1	2	106	10.8906	9.72998	0.844546	1.18901	1.61324	1.2156	1.0869	0.893578	1.0198	1.00009	1.21549	0.400711
P42574	Caspase-3 OS=Homo sapiens GN=CASP3 PE=1 SV=2 - [CASP3_HUMAN]	11.19	2	2	2	277	31.5875	6.53662	0.897003	1.08039	0.989457	0.988949	1.03349	1.05924	1.10839	1.06704	0.926817	0.244739
Q9Y646	Carboxypeptidase Q OS=Homo sapiens GN=CPQ PE=1 SV=1 - [CBPQ_HUMAN]	4.66	3	3	3	472	51.8545	6.17627	1.05918	1.03391	1.08556	1.05955	1.02416	0.887838	0.947029	0.953009	1.1118	0.0649879
B2RBR9	cDNA, FLJ95650, highly similar to Homo sapiens karyopherin (importin) beta 1 (KPNB1), mRNA OS=Homo sapiens PE=2 SV=1 - [B2RBR9_HUMAN]	5.37	3	3	3	876	97.122	4.77979	1.00226	0.956489	1.0342	0.997651	0.953536	1.01913	1.0861	1.01959	0.978484	0.647296
Q5JRR9	Ubiquitin-like modifier-activating enzyme 1 (Fragment) OS=Homo sapiens GN=UBA1 PE=1 SV=8 - [Q5JRR9_HUMAN]	8.89	2	2	2	270	29.1616	4.98291	1.01654	1.05715	1.17829	1.08399	1.03065	1.07053	1.0968	1.06599	1.01688	0.747844
A2NV54	Precursor (AA -19 to 108) (Fragment) OS=Homo sapiens PE=2 SV=1 - [A2NV54_HUMAN]	22.31	1	3	11	130	13.5558	8.17725	0.816075	0.749875	0.667075	0.744342	0.787817	1.90748	0.556021	1.08377	0.686806	0.463794
P35555	Fibrillin-1 OS=Homo sapiens GN=FBN1 PE=1 SV=3 - [FBN1_HUMAN]	1.36	4	4	4	2871	312.022	4.93213	1.24061	0.927684	0.930531	1.03294	0.884547	1.05482	1.03662	0.991997	1.04128	0.744084
B4DL49	cDNA FLJ58073, moderately similar to Cathepsin B (EC 3.4.22.1) OS=Homo sapiens PE=2 SV=1 - [B4DL49_HUMAN]	14.29	3	3	3	273	30.7477	6.62451	1.22817	1.02183	0.996042	1.08201	0.954916	1.12583	0.91934	1.00003	1.08198	0.44669
Q8NDA2	Hemicentin-2 OS=Homo sapiens GN=HMCN2 PE=2 SV=3 - [HMCN2_HUMAN]	0.2	1	1	1	5059	541.639	5.87158	0.949079	0.9593	0.948843	0.952407	1.06249	0.882443	1.1174	1.02078	0.933019	0.390355
B4E0K5	Mitogen-activated protein kinase OS=Homo sapiens GN=MAPK14 PE=1 SV=1 - [B4E0K5_HUMAN]	6.71	1	2	3	283	32.3363	4.91943	0.882547	1.01581	1.25546	1.05127	1.09834	1.05174	0.979198	1.04309	1.00784	0.946473
B4DEA3	cDNA FLJ56531, highly similar to UV excision repair protein RAD23 homolog B OS=Homo sapiens PE=2 SV=1 - [B4DEA3_HUMAN]	6.7	3	3	3	403	42.2834	5.42725	1.04348	1.05705	1.26286	1.12113	1.04556	0.918213	1.15442	1.0394	1.07864	0.453187
O95978	VH1 protein (Fragment) OS=Homo sapiens GN=VH1 PE=4 SV=1 - [O95978_HUMAN]	12.1	1	2	4	157	17.2925	9.78857	0.494565	0.291125	0.357905	0.381198	0.791368	2.84919	0.3047	1.31508	0.289866	0.298421
E9PC71	Hippocalcin-like protein 1 OS=Homo sapiens GN=HPCAL1 PE=1 SV=1 - [E9PC71_HUMAN]	18.29	3	3	5	175	20.2588	5.68115	0.909429	0.90651	1.56337	1.12644	1.03508	0.951443	1.23758	1.0747	1.04814	0.836121
Q5T085	Alpha-amylase 1 (Fragment) OS=Homo sapiens GN=AMY1B PE=1 SV=1 - [Q5T085_HUMAN]	11.95	3	3	3	226	25.5544	7.31299	1.12706	1.06046	0.824502	1.004	0.908191	0.985192	1.14269	1.01202	0.992077	0.947683
A0A024RDB8	Heparanase, isoform CRA_a OS=Homo sapiens GN=HPSE PE=4 SV=1 - [A0A024RDB8_HUMAN]	3.31	1	1	2	543	61.1381	9.29053	1.07385	0.988141	0.922619	0.994869	1.00114	1.00661	1.01092	1.00622	0.988715	0.808561
P20774	Mimecan OS=Homo sapiens GN=OGN PE=1 SV=1 - [MIME_HUMAN]	10.07	3	3	4	298	33.9009	5.63037	1.15155	0.979166	1.00751	1.04607	0.853413	1.01001	1.00613	0.956518	1.09363	0.294
A0A024RD39	Platelet-activating factor acetylhydrolase OS=Homo sapiens GN=PLA2G7 PE=4 SV=1 - [A0A024RD39_HUMAN]	9.3	5	5	6	441	50.0173	7.56201	1.07329	0.946891	0.794974	0.938385	1.17831	0.991062	0.911613	1.027	0.913719	0.476041
F5H5G1	Limbic system-associated membrane protein OS=Homo sapiens GN=LSAMP PE=1 SV=2 - [F5H5G1_HUMAN]	9.03	2	2	2	288	31.722	5.90967	1.15485	1.01317	0.915506	1.02784	0.88463	1.158	1.01934	1.02066	1.00704	0.948791
Q8NBJ4	Golgi membrane protein 1 OS=Homo sapiens GN=GOLM1 PE=1 SV=1 - [GOLM1_HUMAN]	10.47	3	3	4	401	45.3058	4.97021	1.29263	1.0948	0.930989	1.10614	0.833552	1.08417	0.911207	0.942976	1.17303	0.271832
Q6IBS0	Twinfilin-2 OS=Homo sapiens GN=TWF2 PE=1 SV=2 - [TWF2_HUMAN]	8.02	3	3	3	349	39.5233	6.84424	0.867185	1.03695	1.46328	1.12247	1.06598	1.01273	1.16042	1.07971	1.03961	0.826232
G8JLD5	Dynamin-1-like protein OS=Homo sapiens GN=DNM1L PE=1 SV=1 - [G8JLD5_HUMAN]	8.43	6	6	6	712	79.572	7.07861	1.05814	1.12604	1.13805	1.10741	1.06254	0.867712	1.08787	1.00604	1.10076	0.241885
A2N0U2	VH6DJ protein (Fragment) OS=Homo sapiens GN=VH6DJ PE=2 SV=1 - [A2N0U2_HUMAN]	14.04	2	3	15	114	12.543	8.47021	0.750929	0.628859	0.560168	0.646652	1.14678	1.76899	0.687906	1.20123	0.538327	0.156312
A0A1C9J6R2	B cell receptor heavy chain variable region (Fragment) OS=Homo sapiens PE=4 SV=1 - [A0A1C9J6R2_HUMAN]	22.73	2	2	6	132	14.5152	8.83643	0.951173	0.834708	0.791648	0.859176	1.04306	1.35469	0.754796	1.05085	0.817602	0.346126
P04066	Tissue alpha-L-fucosidase OS=Homo sapiens GN=FUCA1 PE=1 SV=4 - [FUCO_HUMAN]	2.36	1	1	1	466	53.6547	6.84424	1.0394	1.19022	1.13763	1.12242	0.782039	0.792083	1.08267	0.885597	1.26741	0.0934747
A0A218KGR2	Amyloid beta A4 protein isoform a OS=Homo sapiens GN=APP PE=4 SV=1 - [A0A218KGR2_HUMAN]	7.14	5	5	5	770	86.8851	4.83057	0.652616	1.07757	1.05945	0.929877	1.20006	0.840907	1.12035	1.05378	0.882425	0.521085
B4DM63	Actin-related protein 2/3 complex subunit 3 OS=Homo sapiens PE=2 SV=1 - [B4DM63_HUMAN]	11.98	2	2	3	167	19.0489	8.88037	0.96987	1.09011	1.29908	1.11969	1.09449	0.84967	1.39439	1.11285	1.00614	0.972221
P12318	Low affinity immunoglobulin gamma Fc region receptor II-a OS=Homo sapiens GN=FCGR2A PE=1 SV=4 - [FCG2A_HUMAN]	9.78	2	2	5	317	34.9785	6.68311	1.11198	0.939717	1.03881	1.03017	0.922653	1.11423	0.979624	1.0055	1.02453	0.760629
P01833	Polymeric immunoglobulin receptor OS=Homo sapiens GN=PIGR PE=1 SV=4 - [PIGR_HUMAN]	6.81	5	5	5	764	83.2317	5.74463	0.659982	0.493226	0.569243	0.57415	1.11026	1.94865	0.525776	1.1949	0.480502	0.209688
B4DVZ8	Leukotriene A(4) hydrolase OS=Homo sapiens PE=2 SV=1 - [B4DVZ8_HUMAN]	10.16	5	5	6	561	63.7894	5.8335	1.13333	0.981333	1.04264	1.05243	0.966101	1.09013	1.13946	1.06523	0.987988	0.859674
H3BLU7	Aflatoxin B1 aldehyde reductase member 2 (Fragment) OS=Homo sapiens GN=AKR7A2 PE=1 SV=1 - [H3BLU7_HUMAN]	9.87	2	2	3	314	34.6622	7.18115	0.924363	1.04332	0.728263	0.898648	1.08698	1.16206	1.00494	1.08466	0.828503	0.143588
E9PNW4	CD59 glycoprotein OS=Homo sapiens GN=CD59 PE=1 SV=1 - [E9PNW4_HUMAN]	7.41	1	1	2	108	11.9765	5.74463	1.22058	0.934451	1.05054	1.06852	1.01015	0.851904	0.928211	0.930089	1.14884	0.218082
B3KQF5	cDNA FLJ90381 fis, clone NT2RP2005035, highly similar to Calumenin OS=Homo sapiens PE=2 SV=1 - [B3KQF5_HUMAN]	20.95	6	6	6	315	36.9956	4.66553	0.871778	1.07114	1.18984	1.04425	1.05998	0.994901	1.2031	1.08599	0.961563	0.726713
B7UCU6	Gamma-globin chain (Fragment) OS=Homo sapiens GN=HBG2 PE=3 SV=1 - [B7UCU6_HUMAN]	18.1	1	2	3	105	11.5789	6.68311	0.934752	0.736638	0.728805	0.800065	0.916994	1.44212	0.681062	1.01339	0.789493	0.414979
Q68BL8	Olfactomedin-like protein 2B OS=Homo sapiens GN=OLFML2B PE=2 SV=2 - [OLM2B_HUMAN]	0.8	1	1	5	750	83.9466	5.19873	1.13984	1.05038	1.00574	1.06532	0.857619	0.866312	1.0161	0.913343	1.16639	0.0789534
F5H6R7	Ras-related protein Rap-1b (Fragment) OS=Homo sapiens GN=RAP1B PE=1 SV=1 - [F5H6R7_HUMAN]	21.31	2	2	2	122	13.7438	4.58936	0.73047	1.13817	1.45311	1.10725	1.03689	0.659705	1.22449	0.973695	1.13716	0.643302
B2R932	cDNA, FLJ94187, highly similar to Homo sapiens CD99 antigen (CD99), mRNA OS=Homo sapiens PE=2 SV=1 - [B2R932_HUMAN]	7.57	1	1	1	185	18.9354	4.81787	0.922136	1.32997	1.0564	1.10284	1.02739	1.21387	1.0511	1.09745	1.0049	0.969779
P08493	Matrix Gla protein OS=Homo sapiens GN=MGP PE=1 SV=2 - [MGP_HUMAN]	10.68	1	1	1	103	12.3453	9.67139	1.65745	1.10446	1.04652	1.26948	0.601568	0.839483	1.5109	0.983985	1.29014	0.441761
B3KR50	cDNA FLJ33691 fis, clone BRAWH2002976, highly similar to GROWTH FACTOR RECEPTOR-BOUND PROTEIN 2 OS=Homo sapiens PE=2 SV=1 - [B3KR50_HUMAN]	13.36	3	3	3	217	25.1784	6.31592	0.866979	0.845508	1.09202	0.934838	1.02909	1.32225	1.03342	1.12825	0.82857	0.196703
D6RF86	Cadherin-6 OS=Homo sapiens GN=CDH6 PE=1 SV=1 - [D6RF86_HUMAN]	3.95	2	2	2	608	67.3607	4.88135	1.15757	0.888471	0.907355	0.984465	0.856721	1.33142	0.929029	1.03906	0.947461	0.765843
E6Y365	Met proto-oncogene variant I OS=Homo sapiens PE=2 SV=1 - [E6Y365_HUMAN]	3.1	3	3	4	934	104.219	7.45947	1.06358	0.927552	1.16794	1.05303	0.934572	1.30827	1.0599	1.10091	0.956502	0.73128
P23470	Receptor-type tyrosine-protein phosphatase gamma OS=Homo sapiens GN=PTPRG PE=1 SV=4 - [PTPRG_HUMAN]	2.21	3	3	3	1445	161.901	6.41748	1.25278	0.920162	0.984525	1.05249	1.00204	0.942899	1.10356	1.01616	1.03575	0.762214
P24844	Myosin regulatory light polypeptide 9 OS=Homo sapiens GN=MYL9 PE=1 SV=4 - [MYL9_HUMAN]	6.4	1	1	1	172	19.8144	4.91943	1.02426	1.02655	1.9182	1.323	0.850832	0.849068	1.41222	1.03737	1.27534	0.462276
Q5T3N1	Annexin (Fragment) OS=Homo sapiens GN=ANXA1 PE=1 SV=1 - [Q5T3N1_HUMAN]	10.78	2	2	2	204	22.7408	5.52881	1.07105	0.969776	1.16681	1.06921	0.905131	1.03157	1.35964	1.09878	0.973089	0.850297
Q9NY97	N-acetyllactosaminide beta-1,3-N-acetylglucosaminyltransferase 2 OS=Homo sapiens GN=B3GNT2 PE=1 SV=2 - [B3GN2_HUMAN]	9.07	3	3	4	397	45.9926	8.54346	1.0468	1.02237	0.981639	1.01694	1.03459	0.963337	0.936001	0.977974	1.03984	0.327941
H3BPL6	Sulfotransferase (Fragment) OS=Homo sapiens GN=SULT1A3 PE=1 SV=1 - [H3BPL6_HUMAN]	10.37	1	1	1	135	15.8749	5.94775	0.956211	0.954004	1.13797	1.01606	1.14108	0.966375	1.15153	1.08633	0.935317	0.457671
B5BUI8	Dual specificity phosphatase 3 (Fragment) OS=Homo sapiens GN=DUSP3 PE=2 SV=1 - [B5BUI8_HUMAN]	12.97	2	2	2	185	20.5644	8.14795	0.984706	1.00143	1.07379	1.01997	1.05936	0.946839	1.12225	1.04282	0.978096	0.714424
P24593	Insulin-like growth factor-binding protein 5 OS=Homo sapiens GN=IGFBP5 PE=1 SV=1 - [IBP5_HUMAN]	15.07	4	4	4	272	30.55	8.20654	0.99252	1.01914	1.11096	1.04087	0.919536	1.04686	0.976792	0.981061	1.06097	0.309282
K7ESE8	Bleomycin hydrolase (Fragment) OS=Homo sapiens GN=BLMH PE=1 SV=1 - [K7ESE8_HUMAN]	5.63	1	1	2	231	26.7211	6.78564	1.14393	0.939707	1.01654	1.03339	0.991254	1.06012	1.09244	1.04794	0.986121	0.837849
D6RC54	Calpastatin (Fragment) OS=Homo sapiens GN=CAST PE=1 SV=1 - [D6RC54_HUMAN]	16.48	1	1	1	91	10.03	4.51318	1.23731	0.973716	0.794392	1.00181	1.05868	0.910559	1.00337	0.99087	1.01104	0.939642
Q9HBR0	Putative sodium-coupled neutral amino acid transporter 10 OS=Homo sapiens GN=SLC38A10 PE=1 SV=2 - [S38AA_HUMAN]	1.34	1	1	1	1119	119.687	5.73193	1.08905	0.935541	1.0273	1.01729	0.834778	1.32045	1.24451	1.13324	0.897682	0.501914
A8KAK1	cDNA FLJ77398, highly similar to Homo sapiens UDP-glucose ceramide glucosyltransferase-like 1, transcript variant 2, mRNA OS=Homo sapiens PE=2 SV=1 - [A8KAK1_HUMAN]	1.44	2	2	2	1531	174.897	5.51611	0.912977	1.04904	1.27205	1.07802	1.01954	1.06042	1.12474	1.06823	1.00916	0.932804
P43686	26S proteasome regulatory subunit 6B OS=Homo sapiens GN=PSMC4 PE=1 SV=2 - [PRS6B_HUMAN]	4.31	1	1	1	418	47.3365	5.21143	0.951362	0.945125	1.30149	1.06599	1.15159	0.897515	1.29235	1.11382	0.957062	0.786298
Q8N1N4	Keratin, type II cytoskeletal 78 OS=Homo sapiens GN=KRT78 PE=1 SV=2 - [K2C78_HUMAN]	5.38	1	4	6	520	56.8305	6.02393	1.46102	1.35251	0.92697	1.24683	0.695166	0.593075	1.24781	0.84535	1.47493	0.198282
B7Z6V5	cDNA FLJ50240, highly similar to ADAM DEC1 (EC 3.4.24.-) (Adisintegrin and metalloproteinase domain-like protein decysin 1) OS=Homo sapiens PE=2 SV=1 - [B7Z6V5_HUMAN]	7.16	2	2	2	391	43.5015	7.00537	1.09164	0.856628	0.939633	0.962633	1.00684	1.20741	0.900531	1.03826	0.92716	0.54088
D6W633	Protein tyrosine phosphatase, receptor type, S, isoform CRA_a OS=Homo sapiens GN=PTPRS PE=4 SV=1 - [D6W633_HUMAN]	2.44	2	2	2	1310	143.342	6.23975	0.956394	1.37646	0.694821	1.00923	1.16752	1.05987	1.48657	1.23799	0.815215	0.387791
E1U340	ZNF511/PRAP1 fusion protein OS=Homo sapiens PE=2 SV=1 - [E1U340_HUMAN]	13.55	3	3	3	310	35.1644	5.93506	1.01606	1.29489	0.891179	1.06737	0.750085	0.891289	1.05024	0.897206	1.18967	0.312876
B4DEK5	cDNA FLJ54596, highly similar to Proactivator polypeptide OS=Homo sapiens PE=2 SV=1 - [B4DEK5_HUMAN]	6.86	3	3	3	452	50.617	4.97021	1.10071	1.01119	0.938387	1.01676	0.970341	1.06313	0.884816	0.972763	1.04523	0.562011
Q496C9	D-aminoacyl-tRNA deacylase OS=Homo sapiens GN=DTD1 PE=2 SV=1 - [Q496C9_HUMAN]	3.35	1	1	1	209	23.469	8.35303	0.883974	1.04375	1.75227	1.22667	1.12102	0.922874	1.21975	1.08788	1.12757	0.646973
A2NYU9	Heavy chain Fab (Fragment) OS=Homo sapiens PE=2 SV=1 - [A2NYU9_HUMAN]	13.93	2	2	5	122	13.5438	9.48096	0.592514	0.347559	0.448971	0.463015	0.753968	2.40962	0.425904	1.1965	0.386975	0.300958
B4DLJ7	cDNA FLJ59334, highly similar to Transmembrane glycoprotein NMB OS=Homo sapiens PE=2 SV=1 - [B4DLJ7_HUMAN]	5.25	2	2	3	514	57.1758	6.771	0.98305	0.806279	0.776382	0.855237	0.961591	1.27918	0.79954	1.01344	0.843897	0.364921
O00194	Ras-related protein Rab-27B OS=Homo sapiens GN=RAB27B PE=1 SV=4 - [RB27B_HUMAN]	9.63	2	2	2	218	24.5922	5.51611	0.783911	0.940257	1.44085	1.05501	0.999595	0.742632	1.32453	1.02225	1.03204	0.90583
Q5NV65	V1-5 protein (Fragment) OS=Homo sapiens GN=V1-5 PE=4 SV=1 - [Q5NV65_HUMAN]	13.13	1	1	1	99	10.3769	4.81787	0.468152	0.331278	0.1889	0.329443	1.04483	3.43369	0.336352	1.60496	0.205266	0.246504
P05556	Integrin beta-1 OS=Homo sapiens GN=ITGB1 PE=1 SV=2 - [ITB1_HUMAN]	6.64	5	5	6	798	88.357	5.38916	1.09579	0.934113	1.00559	1.01183	0.970586	1.068	1.04445	1.02768	0.984582	0.788405
Q5HYG2	Uncharacterized protein DKFZp686H0286 OS=Homo sapiens GN=DKFZp686H0286 PE=2 SV=1 - [Q5HYG2_HUMAN]	15.28	1	1	1	72	8.42748	10.2573	1.12099	1.13613	1.08782	1.11498	0.84895	0.825406	1.19844	0.957598	1.16435	0.264748
Q15828	Cystatin-M OS=Homo sapiens GN=CST6 PE=1 SV=1 - [CYTM_HUMAN]	14.09	2	2	2	149	16.5004	8.08936	0.999189	0.992936	1.04921	1.01378	0.85601	1.1625	1.06844	1.02898	0.985225	0.877263
Q9NTU7	Cerebellin-4 OS=Homo sapiens GN=CBLN4 PE=1 SV=1 - [CBLN4_HUMAN]	5.97	1	1	2	201	21.7944	8.73389	0.984024	1.1602	1.0401	1.06144	0.851071	1.19155	1.15311	1.06524	0.996433	0.976168
B4DNX5	cDNA FLJ59941, highly similar to Drebrin-like protein OS=Homo sapiens PE=2 SV=1 - [B4DNX5_HUMAN]	26.62	3	3	4	139	15.5117	6.34131	0.994672	1.15138	1.28156	1.14254	1.06351	0.965308	1.15864	1.06249	1.07534	0.468118
Q6AI18	Uncharacterized protein DKFZp686M148 (Fragment) OS=Homo sapiens GN=DKFZp686M148 PE=2 SV=1 - [Q6AI18_HUMAN]	14.19	2	2	3	155	16.3379	8.55811	1.00008	1.12735	1.08521	1.07088	0.954373	1.15278	1.06616	1.05777	1.01239	0.857657
B4E3Q1	cDNA FLJ61580, highly similar to Calsyntenin-1 OS=Homo sapiens PE=2 SV=1 - [B4E3Q1_HUMAN]	2.91	2	2	2	962	107.748	4.97021	1.13649	1.03736	1.00578	1.05988	0.883615	0.955761	1.03901	0.959463	1.10465	0.167981
M0R1A1	Syntaxin-binding protein 2 (Fragment) OS=Homo sapiens GN=STXBP2 PE=1 SV=1 - [M0R1A1_HUMAN]	7.73	2	2	3	220	24.6007	7.1665	0.928358	0.988486	1.32398	1.08027	1.12701	0.973958	1.19752	1.0995	0.982517	0.897173
Q9BS26	Endoplasmic reticulum resident protein 44 OS=Homo sapiens GN=ERP44 PE=1 SV=1 - [ERP44_HUMAN]	6.16	2	2	2	406	46.9414	5.26221	1.0932	1.08388	1.54231	1.2398	1.19898	1.07375	1.06018	1.11097	1.11596	0.459569
Q16627	C-C motif chemokine 14 OS=Homo sapiens GN=CCL14 PE=1 SV=1 - [CCL14_HUMAN]	19.35	2	2	4	93	10.6713	8.71924	1.11702	0.961748	0.870257	0.983009	0.889002	1.01968	0.892096	0.933593	1.05293	0.587576
B7Z6Y5	cDNA FLJ58696, highly similar to Endoglin OS=Homo sapiens PE=2 SV=1 - [B7Z6Y5_HUMAN]	5.88	3	3	5	476	51.121	7.28369	0.992951	0.820852	0.927738	0.913847	1.06602	1.0147	0.920656	1.00046	0.913427	0.258358
Q7Z3B1	Neuronal growth regulator 1 OS=Homo sapiens GN=NEGR1 PE=1 SV=3 - [NEGR1_HUMAN]	3.67	1	1	1	354	38.6943	6.21436	1.16139	1.04769	0.874804	1.02796	0.9227	0.969108	0.988525	0.960111	1.07067	0.472219
Q86SQ4	Adhesion G-protein coupled receptor G6 OS=Homo sapiens GN=ADGRG6 PE=1 SV=3 - [AGRG6_HUMAN]	2.21	3	3	3	1221	136.607	7.86963	1.04703	1.01655	1.00981	1.02446	1.01421	1.01444	0.930419	0.986356	1.03863	0.275885
A5PKX5	Alpha-mannosidase OS=Homo sapiens GN=MAN2A1 PE=2 SV=1 - [A5PKX5_HUMAN]	3.41	5	5	5	1143	130.954	7.57666	1.02622	0.972457	0.979369	0.992681	0.88766	0.99163	0.944438	0.941243	1.05465	0.209966
B7Z2T1	cDNA FLJ58061, highly similar to Eukaryotic translation initiation factor 4E OS=Homo sapiens PE=2 SV=1 - [B7Z2T1_HUMAN]	8.09	1	1	1	136	16.279	5.90967	0.953744	1.18578	1.18053	1.10668	1.16385	0.854988	1.2606	1.09315	1.01238	0.929746
P26641	Elongation factor 1-gamma OS=Homo sapiens GN=EEF1G PE=1 SV=3 - [EF1G_HUMAN]	8.01	3	3	3	437	50.0871	6.66846	0.952859	1.07285	1.26175	1.09582	1.03689	0.965317	1.08522	1.02914	1.06479	0.527248
A0A172Q3A0	Fibroblast activation protein (Fragment) OS=Homo sapiens PE=2 SV=1 - [A0A172Q3A0_HUMAN]	2.05	1	2	15	733	84.8221	6.55127	1.04822	1.08027	0.884888	1.00446	0.995871	1.01386	0.926317	0.978681	1.02634	0.716533
P28070	Proteasome subunit beta type-4 OS=Homo sapiens GN=PSMB4 PE=1 SV=4 - [PSB4_HUMAN]	3.79	1	1	1	264	29.1855	5.97314	0.922338	1.07348	1.05153	1.01578	1.01411	1.26183	1.00336	1.0931	0.929269	0.468744
Q7Z4G9	HBxAg-binding protein OS=Homo sapiens GN=HBXBP PE=2 SV=1 - [Q7Z4G9_HUMAN]	4.58	2	2	3	306	34.6328	6.29053	1.35593	1.07354	1.06249	1.16399	0.822916	0.946926	1.05474	0.941527	1.23627	0.130216
Q14427	GM2-activator protein (Fragment) OS=Homo sapiens PE=2 SV=1 - [Q14427_HUMAN]	14.56	2	2	2	103	11.1297	4.75439	1.23026	0.946029	0.973263	1.04985	0.905259	0.87061	0.914424	0.896764	1.17071	0.169717
E9PP76	Copper chaperone for superoxide dismutase (Fragment) OS=Homo sapiens GN=CCS PE=1 SV=1 - [E9PP76_HUMAN]	19.12	1	1	1	68	7.28061	4.83057	1.07768	0.940461	1.31763	1.11193	0.97579	0.874974	1.27998	1.04358	1.06549	0.698637
P41226	Ubiquitin-like modifier-activating enzyme 7 OS=Homo sapiens GN=UBA7 PE=1 SV=2 - [UBA7_HUMAN]	1.58	1	1	1	1012	111.624	6.03662	0.96681	1.04819	1.0359	1.01697	1.15622	1.06244	1.06088	1.09318	0.930284	0.132555
K7EQ48	Glucose-6-phosphate isomerase OS=Homo sapiens GN=GPI PE=1 SV=2 - [K7EQ48_HUMAN]	9.49	6	6	10	474	53.3682	8.67529	0.906744	0.950919	1.19109	1.01625	1.05704	0.993798	1.14274	1.06452	0.954652	0.649165
Q9Y6Z7	Collectin-10 OS=Homo sapiens GN=COLEC10 PE=1 SV=2 - [COL10_HUMAN]	12.27	4	4	5	277	30.6853	7.32764	1.06075	1.08949	0.980428	1.04356	0.855393	1.09041	1.00839	0.98473	1.05974	0.483237
Q5NV84	V1-3 protein (Fragment) OS=Homo sapiens GN=V1-3 PE=4 SV=1 - [Q5NV84_HUMAN]	16.16	1	2	5	99	10.4859	7.06396	0.425978	0.363108	0.283676	0.357587	1.26877	1.82002	0.366378	1.15173	0.31048	0.135529
H0YMZ1	Proteasome subunit alpha type (Fragment) OS=Homo sapiens GN=PSMA4 PE=1 SV=8 - [H0YMZ1_HUMAN]	11.82	3	3	4	220	24.5104	6.771	1.0227	0.938314	1.00207	0.987696	1.11046	1.11742	0.949015	1.05897	0.932699	0.304729
Q8NC59	cDNA FLJ32620 fis, clone STOMA2000386, highly similar to TBC1 domain family member 1 OS=Homo sapiens PE=2 SV=1 - [Q8NC59_HUMAN]	4.15	1	1	2	265	30.7848	5.07178	1.16229	1.03625	0.997997	1.06551	0.81362	1.00729	0.926584	0.915831	1.16344	0.116512
P30086	Phosphatidylethanolamine-binding protein 1 OS=Homo sapiens GN=PEBP1 PE=1 SV=3 - [PEBP1_HUMAN]	16.58	3	3	4	187	21.0437	7.53271	0.942651	0.967577	1.23796	1.0494	1.07835	1.01806	1.0755	1.0573	0.992521	0.938673
C9J3N8	Heat shock protein beta-1 OS=Homo sapiens GN=HSPB1 PE=1 SV=1 - [C9J3N8_HUMAN]	27.03	1	1	1	37	3.88598	5.021	1.17489	0.93115	1.43868	1.18157	0.697389	0.830917	1.44947	0.99259	1.19039	0.528483
B4DTV3	cDNA FLJ57199, highly similar to Probable G-protein coupled receptor 116 OS=Homo sapiens PE=2 SV=1 - [B4DTV3_HUMAN]	4.55	4	4	4	901	99.5245	7.38623	1.10035	1.15484	0.868602	1.04126	0.995554	0.953487	0.922951	0.957331	1.08767	0.404966
P00390	Glutathione reductase, mitochondrial OS=Homo sapiens GN=GSR PE=1 SV=2 - [GSHR_HUMAN]	5.56	3	3	5	522	56.221	8.49951	1.06141	0.936153	1.15063	1.0494	0.965285	1.0717	1.05228	1.02976	1.01907	0.793752
Q9BZQ0	Follistatin-related protein (Fragment) OS=Homo sapiens PE=2 SV=1 - [Q9BZQ0_HUMAN]	9.52	1	1	1	126	14.3257	4.70361	1.29684	1.07339	0.955866	1.1087	0.956996	1.19743	0.875098	1.00984	1.09789	0.5166
B7ZMJ3	ADAMTSL4 protein OS=Homo sapiens GN=ADAMTSL4 PE=2 SV=1 - [B7ZMJ3_HUMAN]	2.71	3	3	3	1035	111.96	8.27979	1.18035	1.10102	1.19717	1.15951	0.895321	0.916139	1.11275	0.974736	1.18957	0.0702631
P14174	Macrophage migration inhibitory factor OS=Homo sapiens GN=MIF PE=1 SV=4 - [MIF_HUMAN]	7.83	1	1	2	115	12.4682	7.88428	0.920734	1.05982	1.14668	1.04241	1.28335	0.924565	0.928888	1.0456	0.996949	0.982396
P35579	Myosin-9 OS=Homo sapiens GN=MYH9 PE=1 SV=4 - [MYH9_HUMAN]	1.07	2	2	2	1960	226.392	5.60498	0.72839	0.718623	1.74547	1.06416	0.841496	0.673527	1.20111	0.905376	1.17538	0.693397
B2R5J8	C-C motif chemokine OS=Homo sapiens PE=2 SV=1 - [B2R5J8_HUMAN]	39.56	4	4	4	91	10.0111	9.0708	1.29767	1.4211	1.3755	1.36476	0.761693	0.769769	1.3682	0.966553	1.41198	0.122737
G1FM90	Anti-Influenza A hemagglutinin heavy chain variable region (Fragment) OS=Homo sapiens PE=2 SV=1 - [G1FM90_HUMAN]	22.48	2	3	8	129	14.5101	8.42627	0.767017	0.473435	0.472525	0.570993	1.02535	2.0098	0.541108	1.19209	0.478986	0.233604
I6L8B7	Fatty acid-binding protein, epidermal OS=Homo sapiens GN=FABP5 PE=1 SV=1 - [I6L8B7_HUMAN]	8.91	1	1	1	101	11.2495	6.07471	1.03854	1.01163	1.62483	1.225	0.835396	0.904932	1.11062	0.950317	1.28904	0.273258
B4DZX0	cDNA FLJ52898, highly similar to Nucleobindin-1 OS=Homo sapiens PE=2 SV=1 - [B4DZX0_HUMAN]	8.39	3	3	3	441	51.5892	5.31299	1.18683	0.895763	1.14719	1.0766	0.886898	1.10225	0.985906	0.991683	1.08562	0.484562
B4DKJ4	cDNA FLJ57738, highly similar to Translationally-controlled tumor protein OS=Homo sapiens PE=2 SV=1 - [B4DKJ4_HUMAN]	14.79	2	2	2	142	16.0938	4.67822	1.0693	1.00165	1.35986	1.1436	1.02251	0.974455	1.31231	1.10309	1.03672	0.803458
A0A0A0MS15	Immunoglobulin heavy variable 3-49 OS=Homo sapiens GN=IGHV3-49 PE=3 SV=1 - [HV349_HUMAN]	7.56	1	1	1	119	13.0475	8.6167	0.24285	0.0933578		0.168104	1.15768	2.66275	0.160094	1.32684	0.126695	0.305781
Q75MU1	Uncharacterized protein WBSCR1 (Fragment) OS=Homo sapiens GN=WBSCR1 PE=4 SV=1 - [Q75MU1_HUMAN]	14.71	2	2	2	136	14.9513	5.42725	0.939001	1.08506	1.55453	1.19286	1.03224	0.800725	1.21565	1.01621	1.17384	0.469064
B3KTG4	cDNA FLJ38197 fis, clone FCBBF1000367, highly similar to Ubiquitin carboxyl-terminal hydrolase 14 (EC 3.1.2.15) OS=Homo sapiens PE=2 SV=1 - [B3KTG4_HUMAN]	5.6	2	2	2	375	42.6867	7.53271	1.0217	1.03347	1.14204	1.06574	0.945103	1.19673	1.14444	1.09542	0.972898	0.746479
B1AP15	CD55 antigen, decay accelerating factor for complement (Cromer blood group), isoform CRA_d OS=Homo sapiens GN=CD55 PE=1 SV=1 - [B1AP15_HUMAN]	5.05	2	2	2	317	34.0118	6.37939	1.1488	0.864082	1.03199	1.01496	1.03144	0.98615	0.889567	0.969052	1.04737	0.646139
K7ELP0	Tropomyosin alpha-4 chain (Fragment) OS=Homo sapiens GN=TPM4 PE=1 SV=1 - [K7ELP0_HUMAN]	62.32	1	5	6	69	8.01803	5.0083	0.880735	0.898946	1.49643	1.09204	1.07993	1.05748	1.17263	1.10335	0.989749	0.958711
I3L3Q4	Glyoxalase domain-containing protein 4 (Fragment) OS=Homo sapiens GN=GLOD4 PE=1 SV=1 - [I3L3Q4_HUMAN]	8.81	2	2	2	227	25.4836	7.00537	0.973567	1.0712	1.25395	1.09957	1.04408	0.935755	1.06701	1.01562	1.08266	0.411243
C9JUG7	F-actin-capping protein subunit alpha-2 OS=Homo sapiens GN=CAPZA2 PE=1 SV=1 - [C9JUG7_HUMAN]	15.07	1	2	3	146	16.6883	5.10986	1.05368	1.10246	1.05709	1.07108	0.985027	0.934121	1.1254	1.01485	1.05541	0.396825
H0YAP2	Polyadenylate-binding protein 1 (Fragment) OS=Homo sapiens GN=PABPC1 PE=1 SV=1 - [H0YAP2_HUMAN]	7.63	1	1	1	131	15.1459	9.64209	1.01395	1.17191	1.63465	1.2735	0.885796	0.84618	1.22811	0.986696	1.29067	0.266399
Q5JXI8	Four and a half LIM domains protein 1 (Fragment) OS=Homo sapiens GN=FHL1 PE=1 SV=1 - [Q5JXI8_HUMAN]	14.79	4	4	5	257	29.1405	8.26514	0.78657	0.959396	0.984917	0.910294	1.09482	1.20934	0.950564	1.08491	0.839052	0.147468
K7ERZ3	Perilipin-3 (Fragment) OS=Homo sapiens GN=PLIN3 PE=1 SV=1 - [K7ERZ3_HUMAN]	9.25	2	2	2	292	31.9632	5.13525	0.984062	0.974742	1.08405	1.01428	1.06382	1.18966	1.09852	1.11733	0.90777	0.114975
F5H0D2	Coronin (Fragment) OS=Homo sapiens GN=CORO1B PE=1 SV=2 - [F5H0D2_HUMAN]	6.47	1	1	1	139	15.2738	6.88818	0.871265	0.97385	1.4256	1.09024	1.01904	1.02752	1.10317	1.04991	1.03841	0.82649
Q5NV89	V1-7 protein (Fragment) OS=Homo sapiens GN=V1-7 PE=4 SV=1 - [Q5NV89_HUMAN]	16.16	2	2	2	99	10.2798	7.06396	0.500601	0.258103	0.322344	0.360349	0.879579	3.1362	0.400848	1.47221	0.244768	0.259299
A0A024R592	Glucosidase, alpha neutral AB, isoform CRA_b OS=Homo sapiens GN=GANAB PE=3 SV=1 - [A0A024R592_HUMAN]	6.38	5	5	5	847	96.1289	5.8335	1.03635	1.05896	1.17692	1.09074	1.05099	1.22508	1.07684	1.11763	0.97594	0.71882
B5MBZ8	Protein phosphatase 1 regulatory subunit 7 OS=Homo sapiens GN=PPP1R7 PE=1 SV=1 - [B5MBZ8_HUMAN]	6.57	1	1	1	274	31.338	4.62744	0.875169	0.96886	0.787315	0.877114	1.23038	1.02242	0.923197	1.05867	0.828509	0.157605
P23381	Tryptophan--tRNA ligase, cytoplasmic OS=Homo sapiens GN=WARS PE=1 SV=2 - [SYWC_HUMAN]	1.7	1	1	1	471	53.1316	6.22705	1.02626	1.04385	1.18364	1.08458	1.02125	0.871661	1.03847	0.97713	1.10997	0.213443
S4R457	Heterogeneous nuclear ribonucleoprotein K OS=Homo sapiens GN=HNRNPK PE=1 SV=1 - [S4R457_HUMAN]	10.39	1	1	1	77	8.78126	4.88135	0.981901	1.03403	1.51217	1.17603	0.93298	0.908993	1.19717	1.01305	1.16089	0.444519
B3KXC5	cDNA FLJ45164 fis, clone BRAWH3044151, highly similar to Homo sapiens ADAMTS-like 2 (ADAMTSL2), mRNA OS=Homo sapiens PE=2 SV=1 - [B3KXC5_HUMAN]	5.26	2	2	3	380	42.4513	7.07861	1.33349	1.0432	1.04161	1.13943	0.893377	0.975295	0.848231	0.905634	1.25816	0.0876501
A0A0X9T7Y9	IBM-A2 heavy chain variable region (Fragment) OS=Homo sapiens PE=2 SV=1 - [A0A0X9T7Y9_HUMAN]	6.4	1	1	2	125	13.817	9.29053	0.583429	0.235263	0.23232	0.350338	0.997008	2.73175	0.418886	1.38255	0.2534	0.216818
B4DNR3	cDNA FLJ52710, highly similar to Abhydrolase domain-containing protein 14B OS=Homo sapiens PE=2 SV=1 - [B4DNR3_HUMAN]	7.03	1	1	1	185	19.7842	6.40479	1.0729	0.956261	1.33036	1.11984	1.02196	1.06278	1.07414	1.05296	1.06352	0.581406
I3L3E9	Flap endonuclease 1 (Fragment) OS=Homo sapiens GN=FEN1 PE=1 SV=1 - [I3L3E9_HUMAN]	4.55	1	1	1	154	17.8983	5.90967	1.09151	1.00579	1.43314	1.17681	0.94219	1.01104	0.880477	0.944569	1.24587	0.162571
D6R9R8	Interleukin-6 receptor subunit alpha (Fragment) OS=Homo sapiens GN=IL6R PE=1 SV=8 - [D6R9R8_HUMAN]	4.71	1	1	1	170	17.8883	8.76318	1.15722	1.21343	0.91971	1.09679	0.911986	0.90928	0.951574	0.92428	1.18664	0.13103
B6EDE2	Epididymis luminal protein 180 (Fragment) OS=Homo sapiens GN=HEL180 PE=2 SV=1 - [B6EDE2_HUMAN]	17.89	1	2	2	123	13.2795	5.45264	0.729431	0.674731	0.604273	0.669478	1	2.31448	0.637311	1.31726	0.508234	0.273497
P25774	Cathepsin S OS=Homo sapiens GN=CTSS PE=1 SV=3 - [CATS_HUMAN]	5.44	2	2	2	331	37.4713	8.33838	0.956428	1.03413	1.03763	1.0094	0.938127	1.03125	0.994039	0.987807	1.02186	0.599171
B2R960	cDNA, FLJ94230, highly similar to Homo sapiens thioredoxin-like 1 (TXNL1), mRNA OS=Homo sapiens PE=2 SV=1 - [B2R960_HUMAN]	10.73	2	2	2	289	32.2167	4.95752	1.01687	0.988749	1.28757	1.09773	1.03144	0.93864	1.11788	1.02932	1.06646	0.562303
H3BR99	Synaptosomal-associated protein 23 (Fragment) OS=Homo sapiens GN=SNAP23 PE=1 SV=1 - [H3BR99_HUMAN]	11.11	1	1	1	90	10.2741	6.52197	1.02202	1.08353	1.23504	1.11353	1.02906	0.945158	1.10115	1.02512	1.08624	0.318751
Q9UL82	Myosin-reactive immunoglobulin light chain variable region (Fragment) OS=Homo sapiens PE=2 SV=1 - [Q9UL82_HUMAN]	16.82	2	2	9	107	11.4377	6.59521	0.440358	0.311181	0.327318	0.359619	0.765155	2.90724	0.300513	1.3243	0.271554	0.296289
Q05DH1	Proteasome subunit alpha type (Fragment) OS=Homo sapiens GN=PSMA7 PE=2 SV=1 - [Q05DH1_HUMAN]	13.45	3	3	3	238	26.6971	8.86572	1.09754	1.05228	0.99311	1.04764	1.02906	1.08806	1.05454	1.05722	0.990944	0.796453
Q96H15	T-cell immunoglobulin and mucin domain-containing protein 4 OS=Homo sapiens GN=TIMD4 PE=1 SV=2 - [TIMD4_HUMAN]	1.85	1	1	2	378	41.5518	6.1001	1.41968	0.979965	0.975216	1.12495	0.889772	1.10394	0.887564	0.960427	1.17131	0.372297
M0QZK8	Uncharacterized protein OS=Homo sapiens PE=4 SV=1 - [M0QZK8_HUMAN]	9.71	1	1	1	103	11.5708	4.91943	0.886358	1.07835	1.50478	1.1565	1.10028	0.748183	1.25074	1.03307	1.11948	0.628233
F2Z2K0	NSFL1 cofactor p47 OS=Homo sapiens GN=NSFL1C PE=1 SV=1 - [F2Z2K0_HUMAN]	9.85	2	2	2	274	30.2019	5.09717	1.18801	0.939617	0.99288	1.04017	1.0531	0.979207	1.31844	1.11692	0.931285	0.580244
B4DMV9	cDNA FLJ53363, highly similar to EH-domain-containing protein 1 OS=Homo sapiens PE=2 SV=1 - [B4DMV9_HUMAN]	5.68	1	3	3	475	53.7352	7.40088	0.925291	0.986163	1.3637	1.09172	0.99808	0.960855	1.14143	1.03345	1.05638	0.713471
Q59FI0	Aconitase 1 variant (Fragment) OS=Homo sapiens PE=3 SV=1 - [Q59FI0_HUMAN]	1.02	1	1	1	781	86.2231	6.27783	0.971513	0.938658	1.36284	1.091	0.99232	1.17673	0.999306	1.05612	1.03303	0.826406
B7Z2R3	cDNA FLJ59510, highly similar to Homo sapiens tight junction protein 2 (TJP2), transcript variant 2, mRNA OS=Homo sapiens PE=2 SV=1 - [B7Z2R3_HUMAN]	1.08	1	1	1	1020	115.112	6.7124	1.151	0.967605	1.51652	1.21171	1.02783	0.716754	1.23703	0.993871	1.21918	0.380241
C9JEE0	Immunoglobulin lambda-like polypeptide 1 (Fragment) OS=Homo sapiens GN=IGLL1 PE=1 SV=1 - [C9JEE0_HUMAN]	3.89	1	1	2	180	19.2149	10.6821	0.76995	0.593437	0.675798	0.679729	0.896191	1.80434	0.714826	1.13845	0.597063	0.249604
B5BU41	Calcium/calmodulin-dependent protein kinase I OS=Homo sapiens GN=CAMK1 PE=2 SV=1 - [B5BU41_HUMAN]	3.51	1	1	1	370	41.2527	5.35107	0.886554	0.991957	1.23924	1.03925	0.990906	1.05942	1.2586	1.10297	0.942225	0.654012
A0A0F7TAG7	IGHV3-72 protein (Fragment) OS=Homo sapiens GN=IGHV3-72 PE=4 SV=1 - [A0A0F7TAG7_HUMAN]	17.48	1	2	10	103	11.6685	8.41162	0.535368	0.3417	0.338762	0.405277	0.894633	2.58853	0.421048	1.3014	0.311415	0.246759
Q9NPR2	Semaphorin-4B OS=Homo sapiens GN=SEMA4B PE=1 SV=3 - [SEM4B_HUMAN]	3.85	3	3	3	832	92.1347	6.94678	0.97477	1.00006	0.848408	0.941078	0.986242	1.1526	0.792622	0.977154	0.96308	0.767683
G3V4X5	Proteasome endopeptidase complex OS=Homo sapiens GN=PSMA3 PE=1 SV=1 - [G3V4X5_HUMAN]	8.89	2	2	2	180	20.275	5.09717	1.06981	1.03307	1.08574	1.06287	1.03916	1.17131	0.945555	1.05201	1.01033	0.879594
Q68DY8	Uncharacterized protein DKFZp686I11137 OS=Homo sapiens GN=DKFZp686I11137 PE=2 SV=1 - [Q68DY8_HUMAN]	2.55	1	1	1	667	73.2843	5.2876	1.15653	1.08171	0.950642	1.06296	0.843602	0.846509	1.02808	0.906064	1.17316	0.141072
D3DSC5	Neural cell adhesion molecule 2, isoform CRA_a (Fragment) OS=Homo sapiens GN=NCAM2 PE=4 SV=1 - [D3DSC5_HUMAN]	1.22	1	1	1	818	90.9951	5.60498	1.14124	1.0161	1.11928	1.09221	0.974676	0.920661	1.07411	0.989816	1.10344	0.158906
A0A1B0GVK0	Fibroleukin OS=Homo sapiens GN=FGL2 PE=1 SV=1 - [A0A1B0GVK0_HUMAN]	4	1	1	1	225	25.3467	5.52881	1.33395	0.996923	1.09469	1.14185	1.01461	1.1032	0.778929	0.965578	1.18256	0.274204
A0A068LN03	Ig heavy chain variable region (Fragment) OS=Homo sapiens PE=2 SV=1 - [A0A068LN03_HUMAN]	15	1	2	8	120	13.3755	8.42627	0.57054	0.423554	0.48737	0.493821	1.07026	2.11179	0.467976	1.21667	0.405878	0.208093
A0A024R599	Solute carrier family 3 (Activators of dibasic and neutral amino acid transport), member 2, isoform CRA_e OS=Homo sapiens GN=SLC3A2 PE=4 SV=1 - [A0A024R599_HUMAN]	6.53	3	3	3	398	43.4916	5.49072	1.15541	1.12892	0.947389	1.07724	1.01935	0.929214	0.959266	0.969276	1.11138	0.200631
Q14126	Desmoglein-2 OS=Homo sapiens GN=DSG2 PE=1 SV=2 - [DSG2_HUMAN]	6.26	7	7	9	1118	122.218	5.23682	1.14333	0.97545	1.00432	1.04103	0.948134	1.12213	0.931098	1.00045	1.04056	0.638955
B4DPP0	cDNA FLJ51032, highly similar to CD9 antigen OS=Homo sapiens PE=2 SV=1 - [B4DPP0_HUMAN]	4.96	1	1	2	141	15.8952	6.7417	0.881029	1.23049	1.35545	1.15566	1.0193	0.822486	1.36711	1.06963	1.08042	0.707384
D6RGW0	Endoplasmic reticulum aminopeptidase 2 (Fragment) OS=Homo sapiens GN=ERAP2 PE=1 SV=1 - [D6RGW0_HUMAN]	1.15	1	1	1	694	79.6811	6.27783	1.09345	0.875351	0.958987	0.97593	0.914127	0.888244	0.825129	0.875833	1.11429	0.219424
A0A024R2W4	Dystroglycan 1 (Dystrophin-associated glycoprotein 1), isoform CRA_a OS=Homo sapiens GN=DAG1 PE=4 SV=1 - [A0A024R2W4_HUMAN]	3.69	3	3	3	895	97.4797	8.55811	1.06873	1.02639	0.770573	0.95523	1.00127	0.906847	0.89784	0.93532	1.02129	0.850174
P07942	Laminin subunit beta-1 OS=Homo sapiens GN=LAMB1 PE=1 SV=2 - [LAMB1_HUMAN]	2.24	3	3	4	1786	197.909	4.94482	1.12202	0.971582	0.92696	1.00685	0.927392	0.953749	1.09557	0.992238	1.01473	0.861879
Q99650	Oncostatin-M-specific receptor subunit beta OS=Homo sapiens GN=OSMR PE=1 SV=1 - [OSMR_HUMAN]	1.02	1	1	1	979	110.438	5.8208	1.19877	1.03173	1.12072	1.11707	0.878648	1.00821	1.0548	0.980554	1.13922	0.128655
A0A1W2PRU0	Alpha-endosulfine OS=Homo sapiens GN=ENSA PE=1 SV=1 - [A0A1W2PRU0_HUMAN]	11.76	1	1	1	119	13.1246	6.17627	0.872244	1.25142	0.960899	1.02819	0.921979	1.15622	1.41019	1.1628	0.884237	0.499752
Q86TY5	Galectin OS=Homo sapiens PE=2 SV=1 - [Q86TY5_HUMAN]	5.79	1	1	1	121	13.8882	9.15869	2.06703	1.56074	1.58146	1.73641	0.387662	0.474111	1.83654	0.899439	1.93055	0.167805
A2VDJ4	GNPTG protein (Fragment) OS=Homo sapiens GN=GNPTG PE=2 SV=1 - [A2VDJ4_HUMAN]	3.42	1	1	1	292	32.9384	6.78564	1.15386	0.899871	0.962863	1.00553	1.05882	1.00617	0.839931	0.968305	1.03845	0.730883
A0A087WSY6	Immunoglobulin kappa variable 3D-15 OS=Homo sapiens GN=IGKV3D-15 PE=3 SV=6 - [KVD15_HUMAN]	13.91	1	2	5	115	12.5263	5.18604	0.654823	0.931461	0.351706	0.645997	1.04579	1.87845	0.522596	1.14894	0.562252	0.305925
C9JMK5	Phosphoinositide-3-kinase-interacting protein 1 (Fragment) OS=Homo sapiens GN=PIK3IP1 PE=1 SV=8 - [C9JMK5_HUMAN]	7.64	1	1	1	144	15.9927	7.89893	1.24489	0.880009	1.17381	1.09957	0.977712	0.966906	0.88867	0.944429	1.16427	0.249151
P20618	Proteasome subunit beta type-1 OS=Homo sapiens GN=PSMB1 PE=1 SV=2 - [PSB1_HUMAN]	7.47	2	2	2	241	26.4724	8.1333	1.01142	1.10847	1.04138	1.05375	0.941267	1.3	1.14181	1.12769	0.934435	0.530084
Q96N83	Podocalyxin OS=Homo sapiens PE=2 SV=1 - [Q96N83_HUMAN]	2.51	1	1	1	518	54.543	5.57959	1.23497	1.10807	0.901695	1.08158	1.00216	1.00648	0.981548	0.996728	1.08513	0.432918
A0A087WYC1	Heat shock 70 kDa protein 4 OS=Homo sapiens GN=HSPA4 PE=1 SV=1 - [A0A087WYC1_HUMAN]	2.72	2	2	2	699	78.5562	5.17334	0.949042	1.06962	1.18575	1.06814	1.06579	1.00782	1.09415	1.05592	1.01157	0.87506
H0YA83	Beta-hexosaminidase subunit beta (Fragment) OS=Homo sapiens GN=HEXB PE=1 SV=1 - [H0YA83_HUMAN]	5.88	1	1	1	170	19.5099	5.70654	0.946946	1.02822	1.07141	1.01553	0.826139	0.984352	1.11913	0.976542	1.03992	0.694159
H0YI43	Myosin light polypeptide 6 (Fragment) OS=Homo sapiens GN=MYL6 PE=1 SV=1 - [H0YI43_HUMAN]	15.66	1	1	1	83	9.24322	4.77979	0.822024	0.794756	1.70219	1.10632	0.995859	0.731563	1.24211	0.989843	1.11768	0.74377
Q9UL89	Myosin-reactive immunoglobulin heavy chain variable region (Fragment) OS=Homo sapiens PE=2 SV=1 - [Q9UL89_HUMAN]	16.38	1	2	3	116	12.5973	9.1001	0.701111	0.558432	0.652857	0.637467	1.01019	1.67187	0.650244	1.11077	0.573897	0.19224
Q06323	Proteasome activator complex subunit 1 OS=Homo sapiens GN=PSME1 PE=1 SV=1 - [PSME1_HUMAN]	3.21	1	1	1	249	28.705	6.02393	0.981796	0.970418	1.3571	1.1031	1.05768	0.962626	1.1007	1.04034	1.06033	0.662561
Q8TE63	Immunglobulin light chain variable region (Fragment) OS=Homo sapiens PE=2 SV=1 - [Q8TE63_HUMAN]	22.73	1	3	11	110	11.4717	8.90967	0.698603	0.532795	0.500877	0.577425	0.877574	2.66271	0.518113	1.3528	0.426837	0.309007
P01137	Transforming growth factor beta-1 OS=Homo sapiens GN=TGFB1 PE=1 SV=2 - [TGFB1_HUMAN]	4.1	2	2	2	390	44.3128	8.52881	0.841735	1.07866	1.23918	1.05319	1.05515	1.09753	1.05914	1.07061	0.983734	0.888147
B4DSX2	cDNA FLJ60144, highly similar to Complement component C1q receptor OS=Homo sapiens PE=2 SV=1 - [B4DSX2_HUMAN]	3.17	1	1	1	347	36.5906	6.29053	1.45033	1.07128	0.908667	1.14343	0.847252	0.929524	0.966813	0.91453	1.25029	0.236032
Q53R53	Uncharacterized protein MERTK (Fragment) OS=Homo sapiens GN=MERTK PE=4 SV=1 - [Q53R53_HUMAN]	1.94	1	1	1	567	63.006	5.33838	1.09811	0.979661	1.04494	1.04091	0.947016	1.01284	0.924682	0.961513	1.08257	0.140538
Q8WWZ8	Oncoprotein-induced transcript 3 protein OS=Homo sapiens GN=OIT3 PE=1 SV=2 - [OIT3_HUMAN]	1.28	1	1	1	545	59.9825	5.57959	2.54426	0.799408	0.815049	1.38624	0.619	1.49831	0.567068	0.894794	1.54923	0.49363
A2NYU7	Heavy chain Fab (Fragment) OS=Homo sapiens PE=2 SV=1 - [A2NYU7_HUMAN]	7.09	1	1	3	127	13.9831	9.24658	0.553337	0.394989	0.484214	0.477513	0.818519	2.39549	0.507442	1.24048	0.384941	0.262996
K7EP07	Tubulin-folding cofactor B (Fragment) OS=Homo sapiens GN=TBCB PE=1 SV=8 - [K7EP07_HUMAN]	6.51	1	1	1	169	19.2394	5.33838	1.02808	0.899152	1.50541	1.14421	1.05633	0.945762	1.0304	1.01083	1.13195	0.515906
E9PLD0	Ras-related protein Rab-1B OS=Homo sapiens GN=RAB1B PE=1 SV=1 - [E9PLD0_HUMAN]	13.02	2	3	4	169	18.4714	5.71924	0.94505	1.02056	1.29562	1.08708	1.08827	1.03623	1.09964	1.07471	1.0115	0.914623
E5RGQ7	Dematin (Fragment) OS=Homo sapiens GN=DMTN PE=1 SV=1 - [E5RGQ7_HUMAN]	8.11	1	1	1	148	16.7557	8.88037	0.897915	0.981921	1.09552	0.991785	1.11689	1.0765	1.00842	1.06727	0.929273	0.312829
Q9HB00	Desmocollin 1, isoform CRA_b OS=Homo sapiens GN=DSC1 PE=4 SV=1 - [Q9HB00_HUMAN]	4.88	4	4	4	840	93.776	5.52881	1.10245	0.996692	0.812227	0.970458	0.899508	1.04957	1.0286	0.99256	0.977732	0.830787
Q9BZ93	Prosomal P27K protein (Fragment) OS=Homo sapiens GN=PSMA6 PE=4 SV=1 - [Q9BZ93_HUMAN]	22.41	1	1	1	58	6.19626	8.96826	1.05057	1.11533	1.00194	1.05594	1.06903	0.876668	1.12834	1.02468	1.03051	0.724763
A0A0U1RQQ4	Endothelial protein C receptor (Fragment) OS=Homo sapiens GN=PROCR PE=1 SV=1 - [A0A0U1RQQ4_HUMAN]	10.33	2	2	4	213	24.3793	6.94678	1.13378	1.19674	0.947926	1.09281	1.03668	0.88205	0.864894	0.927876	1.17776	0.14926
Q8WZ75	Roundabout homolog 4 OS=Homo sapiens GN=ROBO4 PE=1 SV=1 - [ROBO4_HUMAN]	7.85	5	5	6	1007	107.39	6.63916	1.23313	0.921935	0.77916	0.978073	0.887445	1.0376	1.03943	0.988161	0.989792	0.947213
P80511	Protein S100-A12 OS=Homo sapiens GN=S100A12 PE=1 SV=2 - [S10AC_HUMAN]	16.3	2	2	2	92	10.5685	6.25244	0.879984	0.849425	1.00441	0.911273	0.941442	1.24022	0.940858	1.04084	0.875517	0.305596
Q5NV82	V4-2 protein (Fragment) OS=Homo sapiens GN=V4-2 PE=4 SV=1 - [Q5NV82_HUMAN]	8.65	1	1	1	104	11.1354	7.97217	0.530193	0.42155	0.393447	0.448397	1.11718	1.98786	0.414916	1.17332	0.382161	0.187745
E9PQ40	Fibroblast growth factor receptor 1 (Fragment) OS=Homo sapiens GN=FGFR1 PE=1 SV=1 - [E9PQ40_HUMAN]	9.41	1	1	2	85	9.53357	4.62744	1.11256	1.01944	0.899528	1.01051	0.922137	0.9223	0.990655	0.945031	1.06929	0.375644
F8VX93	Dynactin subunit 2 (Fragment) OS=Homo sapiens GN=DCTN2 PE=1 SV=1 - [F8VX93_HUMAN]	5.93	1	1	1	135	15.106	6.34131	0.932126	1.00378	1.06883	1.00158	1.21134	1.00517	1.13819	1.11823	0.89568	0.181048
B7Z462	cDNA FLJ58016, highly similar to Polypeptide N-acetylgalactosaminyltransferase2 (EC 2.4.1.41) OS=Homo sapiens PE=2 SV=1 - [B7Z462_HUMAN]	5.28	2	2	2	360	40.7514	8.26514	1.01267	1.02743	0.968441	1.00285	0.975324	1.03036	0.887136	0.964274	1.04	0.442668
A0A0F7SZ86	IGHV2-70 protein (Fragment) OS=Homo sapiens GN=IGHV2-70 PE=4 SV=1 - [A0A0F7SZ86_HUMAN]	23.33	1	2	5	90	10.156	7.95752	0.478481	0.296101	0.192727	0.322436	1.19474	3.23875	0.400634	1.61138	0.2001	0.203785
R4GN98	Protein S100 (Fragment) OS=Homo sapiens GN=S100A6 PE=1 SV=1 - [R4GN98_HUMAN]	25.88	3	3	7	85	9.67506	5.45264	0.974905	1.0863	1.16065	1.07395	1.14756	0.969257	1.1247	1.0805	0.993935	0.936909
F8WAM2	T-complex protein 1 subunit eta (Fragment) OS=Homo sapiens GN=CCT7 PE=1 SV=1 - [F8WAM2_HUMAN]	19.39	2	2	2	98	10.4878	7.41553	1.00178	1.0024	1.11473	1.03964	1.00717	0.937037	0.980037	0.974748	1.06657	0.203578
B5A952	Soluble TIE1 variant 5 OS=Homo sapiens GN=TIE PE=2 SV=1 - [B5A952_HUMAN]	1.2	1	1	1	751	81.1576	7.40088	0.870098	0.968416	0.828348	0.888954	0.996502	1.33961	0.8716	1.06924	0.83139	0.284313
P30530	Tyrosine-protein kinase receptor UFO OS=Homo sapiens GN=AXL PE=1 SV=3 - [UFO_HUMAN]	0.78	1	1	2	894	98.273	5.42725	1.16487	0.809225	1.29614	1.09008	1.03537	0.942703	1.03535	1.00447	1.08523	0.59564
F2Z2Q9	Low molecular weight phosphotyrosine protein phosphatase OS=Homo sapiens GN=ACP1 PE=1 SV=1 - [F2Z2Q9_HUMAN]	12.86	1	1	2	70	7.4958	5.10986	1.01681	1.05465	1.04549	1.03898	1.00129	0.886667	1.17294	1.0203	1.01831	0.834823
D6RDU5	Septin-11 (Fragment) OS=Homo sapiens GN=SEPT11 PE=1 SV=1 - [D6RDU5_HUMAN]	17.74	5	6	7	372	43.0859	6.30322	1.01108	0.985465	1.22322	1.07326	1.12266	0.891292	1.1773	1.06375	1.00894	0.938407
B4DV98	cDNA FLJ53522, highly similar to Homo sapiens mucin and cadherin-like (MUCDHL), transcript variant 3, mRNA OS=Homo sapiens PE=2 SV=1 - [B4DV98_HUMAN]	1.55	1	1	1	644	68.8288	4.84326	1.07972	0.976047	0.979782	1.01185	0.879663	1.15845	1.13542	1.05785	0.956519	0.65547
H6UYS7	Alpha-synuclein OS=Homo sapiens GN=SNCA PE=1 SV=1 - [H6UYS7_HUMAN]	16.33	1	1	3	98	10.0142	6.7417	1.09512	1.12457	1.10376	1.10781	0.902839	1.11314	1.01391	1.00996	1.09689	0.186024
B3KXM9	cDNA FLJ45746 fis, clone KIDNE2018727, highly similar to Uromodulin OS=Homo sapiens PE=2 SV=1 - [B3KXM9_HUMAN]	4.44	2	2	2	428	47.3398	6.7417	1.12626	0.989633	1.08153	1.06581	1.04243	0.998892	0.893807	0.978377	1.08936	0.216874
J3QRA3	Na(+)/H(+) exchange regulatory cofactor NHE-RF1 (Fragment) OS=Homo sapiens GN=SLC9A3R1 PE=1 SV=1 - [J3QRA3_HUMAN]	20	1	1	1	35	4.05595	4.88135	0.876668	1.00571	1.6092	1.16386	1.11336	0.90573	1.26099	1.09336	1.06448	0.790448
M0R0Y2	Alpha-soluble NSF attachment protein OS=Homo sapiens GN=NAPA PE=1 SV=1 - [M0R0Y2_HUMAN]	8.98	2	2	2	256	29.1443	5.16064	1.01685	1.00372	1.29596	1.10551	1.02843	0.907889	1.13025	1.02219	1.08151	0.508669
P03973	Antileukoproteinase OS=Homo sapiens GN=SLPI PE=1 SV=2 - [SLPI_HUMAN]	5.3	1	1	1	132	14.3159	8.74854	1.06152	0.967898	1.09288	1.04076	0.962545	0.916003	1.00204	0.960195	1.08391	0.148071
B4E143	cDNA FLJ58084, highly similar to Receptor-type tyrosine-protein phosphatase mu (EC 3.1.3.48) OS=Homo sapiens PE=2 SV=1 - [B4E143_HUMAN]	2.95	3	3	3	847	94.051	7.31299	1.06877	1.02666	0.933269	1.00957	0.935509	0.958829	1.02187	0.972071	1.03857	0.475161
P11766	Alcohol dehydrogenase class-3 OS=Homo sapiens GN=ADH5 PE=1 SV=4 - [ADHX_HUMAN]	4.28	2	2	2	374	39.6984	7.48877	0.997687	1.01784	1.08659	1.03404	1.19062	0.901535	1.19437	1.09551	0.943891	0.574414
G5E968	Chromogranin A (Parathyroid secretory protein 1), isoform CRA_b OS=Homo sapiens GN=CHGA PE=1 SV=1 - [G5E968_HUMAN]	22.22	4	4	4	306	34.2481	4.94482	1.19178	1.39456	0.965949	1.1841	0.976697	0.806892	1.02954	0.937709	1.26276	0.155113
A0A024QZV0	HCG1811539, isoform CRA_b OS=Homo sapiens GN=hCG_1811539 PE=3 SV=1 - [A0A024QZV0_HUMAN]	9.57	2	3	5	324	36.155	5.46533	0.93767	0.802935	1.2718	1.00414	1.03181	1.10367	1.08403	1.07317	0.935672	0.650072
Q9H3K6	BolA-like protein 2 OS=Homo sapiens GN=BOLA2 PE=1 SV=1 - [BOLA2_HUMAN]	18.6	1	1	1	86	10.1102	6.52197	0.938854	1.03814	1.01429	0.997094	0.965792	1.23761	1.12372	1.10904	0.89906	0.254899
A7MBN2	TNC protein OS=Homo sapiens GN=TNC PE=2 SV=1 - [A7MBN2_HUMAN]	4.26	7	7	8	1927	210.355	4.98291	1.01997	1.00892	0.945746	0.991543	0.949612	1.00708	1.0086	0.98843	1.00315	0.922829
A0A1B0GTV0	Methyl-CpG-binding protein 2 (Fragment) OS=Homo sapiens GN=MECP2 PE=1 SV=1 - [A0A1B0GTV0_HUMAN]	15.09	1	1	1	53	6.07449	9.90576	0.89014	1.03857	0.888373	0.939027	1.04149	0.895806	1.12303	1.02011	0.920517	0.3841
W6MEN4	Beta-1,4-galactosyltransferase 1 OS=Homo sapiens GN=B4GALT1 PE=2 SV=1 - [W6MEN4_HUMAN]	3.65	1	1	1	219	23.3602	8.99756	1.3096	1.05437	0.893262	1.08575	0.890453	0.919903	0.889972	0.90011	1.20624	0.201591
H0YDG0	Puromycin-sensitive aminopeptidase (Fragment) OS=Homo sapiens GN=NPEPPS PE=1 SV=1 - [H0YDG0_HUMAN]	13.02	2	2	2	169	19.04	7.44482	0.95435	0.969745	1.18124	1.03511	1.06477	1.19319	1.0099	1.08929	0.950265	0.584256
P50453	Serpin B9 OS=Homo sapiens GN=SERPINB9 PE=1 SV=1 - [SPB9_HUMAN]	7.98	3	3	3	376	42.3763	5.85889	1.13726	0.941322	1.05784	1.04547	1.01793	0.962566	1.05315	1.01122	1.03388	0.613931
O43234	Rheumatoid factor RF-ET13 (Fragment) OS=Homo sapiens PE=2 SV=1 - [O43234_HUMAN]	7.22	1	1	1	97	10.7414	9.20264	0.568842	0.391225	0.351546	0.437205	1.26938	2.99871	0.473401	1.5805	0.276625	0.201313
Q9Y608	Leucine-rich repeat flightless-interacting protein 2 OS=Homo sapiens GN=LRRFIP2 PE=1 SV=1 - [LRRF2_HUMAN]	3.19	2	2	2	721	82.1213	6.94678	1.07941	0.937507	1.58374	1.20022	0.8494	1.06792	1.15201	1.02311	1.17311	0.457974
Q71UM7	Beta-subunit signal transducing proteins GS/GI (Fragment) OS=Homo sapiens PE=2 SV=1 - [Q71UM7_HUMAN]	7.87	1	1	1	127	13.8604	4.90674	1.09316	1.00466	1.20697	1.1016	1.02047	0.992512	1.07303	1.02867	1.07089	0.312358
A3KFI2	Neuroblastoma suppressor of tumorigenicity 1 (Fragment) OS=Homo sapiens GN=NBL1 PE=1 SV=1 - [A3KFI2_HUMAN]	12.84	2	2	2	109	11.8488	5.73193	1.10362	0.888374	0.988823	0.993605	0.88419	0.96507	0.918012	0.922424	1.07717	0.344457
A6NHN0	Otolin-1 OS=Homo sapiens GN=OTOL1 PE=3 SV=1 - [OTOL1_HUMAN]	1.68	1	1	1	477	49.3906	8.33838	0.36561	0.297798	0.267783	0.310397	1.1367	2.22151	0.275533	1.21125	0.256262	0.185283
Q7L576	Cytoplasmic FMR1-interacting protein 1 OS=Homo sapiens GN=CYFIP1 PE=1 SV=1 - [CYFP1_HUMAN]	1.84	2	2	2	1253	145.089	6.90283	0.9173	1.14052	1.13026	1.0627	1.13428	0.954758	0.972184	1.02041	1.04144	0.671352
K7EIW7	Platelet glycoprotein VI (Fragment) OS=Homo sapiens GN=GP6 PE=1 SV=1 - [K7EIW7_HUMAN]	12.82	2	2	2	117	12.9923	8.89502	0.926733	0.966339	1.34023	1.07777	1.14676	0.925939	1.27844	1.11705	0.964835	0.82571
V9HW76	Epididymis secretory protein Li 300 OS=Homo sapiens GN=HEL-S-300 PE=2 SV=1 - [V9HW76_HUMAN]	6.73	2	2	3	223	25.4147	7.45947	1.026	1.08078	0.890976	0.999249	1.01724	0.829686	0.960288	0.935739	1.06787	0.467229
B4DUJ3	cDNA FLJ52895, highly similar to Carbonic anhydrase 3 (EC 4.2.1.1) OS=Homo sapiens PE=2 SV=1 - [B4DUJ3_HUMAN]	7.66	2	2	2	235	26.7905	8.30908	0.997267	0.907002	0.901845	0.935371	1.00176	1.02275	0.97974	1.00142	0.934049	0.118988
P46109	Crk-like protein OS=Homo sapiens GN=CRKL PE=1 SV=1 - [CRKL_HUMAN]	7.59	2	2	2	303	33.7559	6.7417	0.742323	0.892932	1.34124	0.992164	1.27562	1.62162	0.988244	1.29516	0.766054	0.303208
B4DF17	cDNA FLJ59187, highly similar to Multiple coagulation factor deficiency protein 2 homolog OS=Homo sapiens PE=2 SV=1 - [B4DF17_HUMAN]	13.39	1	1	1	127	14.3948	4.91943	0.957475	1.07692	1.01656	1.01698	1.12533	1.0569	1.20331	1.12851	0.901173	0.11047
Q53G89	Elongation factor 1-alpha (Fragment) OS=Homo sapiens PE=2 SV=1 - [Q53G89_HUMAN]	5.77	3	3	3	433	46.8644	9.11475	0.992714	1.03057	1.23176	1.08502	0.982449	0.933206	1.13388	1.01651	1.06739	0.51347
Q7Z759	CCT8 protein OS=Homo sapiens GN=CCT8 PE=2 SV=1 - [Q7Z759_HUMAN]	4.43	2	2	2	497	54.0717	5.31299	0.927353	1.09346	1.31272	1.11118	1.00344	0.769432	1.2918	1.02156	1.08773	0.65813
A8K9D8	cDNA FLJ78129, highly similar to Homo sapiens reversion-inducing-cysteine-rich protein with kazal motifs (RECK), mRNA OS=Homo sapiens PE=2 SV=1 - [A8K9D8_HUMAN]	0.72	1	1	1	971	106.387	6.68311	1.15396	1.19988	1.03982	1.13122	0.935652	0.761027	1.06323	0.919968	1.22963	0.101423
B4DJQ7	cDNA FLJ60602, moderately similar to D-dopachrome decarboxylase (EC 4.1.1.84) OS=Homo sapiens PE=2 SV=1 - [B4DJQ7_HUMAN]	13.39	2	2	3	112	11.6678	5.78271	1.02749	0.962068	1.16834	1.05263	1.05759	1.01181	1.03879	1.03606	1.01599	0.803378
B4DHM1	cDNA FLJ54508, highly similar to tRNA(5-methylaminomethyl-2-thiouridylate)-methyltransferase (EC 2.1.1.61) OS=Homo sapiens PE=2 SV=1 - [B4DHM1_HUMAN]	1.83	1	1	1	328	37.099	7.97217	0.89835	1.06569	0.93937	0.967805	1.09066	1.0008	1.08432	1.05859	0.914236	0.1931
C9IY94	Septin-2 (Fragment) OS=Homo sapiens GN=SEPT2 PE=1 SV=1 - [C9IY94_HUMAN]	9.92	1	1	1	121	13.728	5.80811	1.00583	1.07791	1.12872	1.07082	0.982519	1.00485	1.44347	1.14361	0.936347	0.661561
A8K990	cDNA FLJ78482 OS=Homo sapiens PE=2 SV=1 - [A8K990_HUMAN]	1.16	1	1	1	774	84.0867	4.33545	1.1593	0.877867	0.9489	0.995356	0.939283	1.94185	0.907433	1.26285	0.788179	0.487267
E9PN95	Uteroglobin OS=Homo sapiens GN=SCGB1A1 PE=1 SV=1 - [E9PN95_HUMAN]	12.5	1	1	1	56	6.28112	4.95752	1.17007	0.82273	0.794273	0.929024	0.788156	1.09863	0.667272	0.851352	1.09123	0.682366
D6RIU4	Vesicular integral-membrane protein VIP36 (Fragment) OS=Homo sapiens GN=LMAN2 PE=1 SV=8 - [D6RIU4_HUMAN]	6.28	1	1	1	191	21.8466	6.52197	1.24028	0.922971	0.965809	1.04302	0.907702	0.965047	0.887674	0.920141	1.13355	0.295012
Q86U17	Serpin A11 OS=Homo sapiens GN=SERPINA11 PE=2 SV=2 - [SPA11_HUMAN]	3.79	2	2	2	422	46.9595	7.6792	1.28703	0.94477	1.06874	1.10018	0.954726	1.12625	0.944309	1.00843	1.09099	0.473715
Q96SC2	Glutamate receptor 7 (Fragment) OS=Homo sapiens GN=GRIK3 PE=4 SV=1 - [Q96SC2_HUMAN]	15.66	1	1	1	83	9.33001	8.14795	0.600082	0.679282	0.20944	0.496268	1.34474	1.21607	0.665491	1.07543	0.461458	0.0847153
X6RFL8	Ras-related protein Rab-14 (Fragment) OS=Homo sapiens GN=RAB14 PE=1 SV=1 - [X6RFL8_HUMAN]	13.26	2	2	2	181	20.3963	6.32861	1.03631	1.03144	1.15047	1.07274	1.04295	0.93707	1.20385	1.06129	1.01079	0.901401
B7Z795	Carboxylic ester hydrolase OS=Homo sapiens PE=2 SV=1 - [B7Z795_HUMAN]	8.1	3	3	3	432	47.6793	5.94775	0.890596	1.12807	1.07813	1.03227	0.929616	1.20474	1.13185	1.08874	0.948135	0.633374
Q86WA0	Hypoxia-inducible HIG-1 (Fragment) OS=Homo sapiens GN=HIG-1 PE=2 SV=1 - [Q86WA0_HUMAN]	1.66	1	1	1	722	81.6964	7.51807	1.43412	0.828464	1.29557	1.18605	0.992529	0.508822	0.78753	0.76296	1.55454	0.140563
A0A125U0V1	MS-F1 heavy chain variable region (Fragment) OS=Homo sapiens PE=2 SV=1 - [A0A125U0V1_HUMAN]	7.94	1	1	1	126	13.5004	8.1626	0.619636	0.656434	0.333502	0.536524	0.936289	2.31172	0.499858	1.24929	0.429464	0.268686
Q5NV62	V3-4 protein (Fragment) OS=Homo sapiens GN=V3-4 PE=4 SV=1 - [Q5NV62_HUMAN]	9.09	1	1	2	99	10.3689	4.729	0.609155	0.536091	0.508537	0.551261	1.31015	1.8763	0.648227	1.27823	0.43127	0.110788
J3KQ45	Trans-Golgi network integral membrane protein 2 OS=Homo sapiens GN=TGOLN2 PE=1 SV=1 - [J3KQ45_HUMAN]	9.03	4	4	4	454	47.8517	5.84619	1.12766	0.891379	0.956482	0.99184	1.01184	1.1886	0.91775	1.0394	0.954247	0.677345
Q07960	Rho GTPase-activating protein 1 OS=Homo sapiens GN=ARHGAP1 PE=1 SV=1 - [RHG01_HUMAN]	12.98	4	4	5	439	50.4042	6.29053	1.08212	1.08776	0.955412	1.04176	1.11379	1.0485	1.18558	1.11596	0.933518	0.274196
B0BCY7	Aminopeptidase OS=Homo sapiens GN=ENPEP PE=2 SV=1 - [B0BCY7_HUMAN]	0.84	1	1	1	957	109.162	5.46533	1.03701	1.036	1.27533	1.11611	1.07361	0.883593	1.14706	1.03476	1.07863	0.50711
P14550	Alcohol dehydrogenase [NADP(+)] OS=Homo sapiens GN=AKR1A1 PE=1 SV=3 - [AK1A1_HUMAN]	2.46	1	1	1	325	36.5499	6.78564	1.00246	1.01298	1.17167	1.06237	1.07264	0.966943	1.16764	1.06907	0.99373	0.937028
C9JM82	Septin-5 (Fragment) OS=Homo sapiens GN=SEPT5 PE=1 SV=1 - [C9JM82_HUMAN]	3.99	1	1	1	301	34.6506	6.20166	0.941832	0.909875	1.24238	1.03136	1.15306	1	1.08598	1.07968	0.955248	0.69547
A2NU33	Lambda L-chain C region (Fragment) OS=Homo sapiens PE=4 SV=1 - [A2NU33_HUMAN]	21.7	1	2	2	106	11.5896	7.07861	0.742454	0.459578	0.536891	0.579641	0.948859	2.29025	0.639738	1.29295	0.448309	0.237177
B4DDT1	cDNA FLJ50111, highly similar to Hepatic triacylglycerol lipase (EC 3.1.1.3) OS=Homo sapiens PE=2 SV=1 - [B4DDT1_HUMAN]	1.6	1	1	1	438	48.9341	9.12939	0.990402	0.783185	0.935965	0.903184	1.10691	0.9407	0.740396	0.929336	0.971859	0.841734
D6RC06	Histidine triad nucleotide-binding protein 1 OS=Homo sapiens GN=HINT1 PE=1 SV=1 - [D6RC06_HUMAN]	10.77	1	1	1	65	7.31895	9.40771	0.80738	0.955018	1.229	0.997132	1.17461	0.978682	1.03108	1.06146	0.9394	0.66247
Q00610	Clathrin heavy chain 1 OS=Homo sapiens GN=CLTC PE=1 SV=5 - [CLH1_HUMAN]	2.39	3	4	5	1675	191.493	5.69385	1.04732	1.00361	0.91065	0.987191	1.06519	0.906109	1.18253	1.05128	0.939039	0.514268
Q5R341	Selectin P (Granule membrane protein 140kDa, antigen CD62), isoform CRA_a OS=Homo sapiens GN=SELP PE=1 SV=1 - [Q5R341_HUMAN]	2.21	2	2	2	768	83.9802	6.7124	0.778536	1.1154	1.01297	0.968967	1.09722	1.18923	0.906154	1.0642	0.91051	0.504318
A0A1E1ERW3	Diaphanous homolog 1 OS=Homo sapiens GN=DIAPH1 PE=2 SV=1 - [A0A1E1ERW3_HUMAN]	0.67	1	1	1	1203	133.796	5.2749	1.18013	1.09939	1.25241	1.17731	0.945149	1.00695	1.30194	1.08468	1.0854	0.478532
B7Z5C1	cDNA FLJ56126, highly similar to Programmed cell death 6-interacting protein OS=Homo sapiens PE=2 SV=1 - [B7Z5C1_HUMAN]	2	1	1	1	649	71.7747	6.41748	1.10165	1.20521	1.30314	1.20333	0.882026	0.844984	1.13816	0.955058	1.25996	0.0849893
Q5J1K4	Mono-ADP-ribosyltransferase 3 variant Id (Fragment) OS=Homo sapiens PE=2 SV=1 - [Q5J1K4_HUMAN]	25	2	2	2	84	9.55669	5.40186	1.03404	0.822058	1.08129	0.979128	1.08079	0.98701	0.93316	1.00032	0.978815	0.826601
Q59H30	Activating transcription factor 6 variant (Fragment) OS=Homo sapiens PE=2 SV=1 - [Q59H30_HUMAN]	2.08	1	1	1	578	64.1779	8.48486	0.946735	1.21263	1.31105	1.1568	0.654241	1.19841	1.23535	1.02933	1.12384	0.588623
K7EJ25	N-acetylglucosamine-1-phosphodiester alpha-N-acetylglucosaminidase (Fragment) OS=Homo sapiens GN=NAGPA PE=1 SV=1 - [K7EJ25_HUMAN]	7.69	1	1	1	104	11.1156	8.88037	1.04144	1.0347	1.09019	1.05544	1.01401	0.980093	1.09346	1.02919	1.02551	0.526277
A0A0C4DH35	Immunoglobulin heavy variable 3-35 (non-functional) (Fragment) OS=Homo sapiens GN=IGHV3-35 PE=1 SV=1 - [A0A0C4DH35_HUMAN]	9.4	1	1	2	117	12.8023	7.88428	0.679848	0.432821	0.459732	0.524134	0.982736	2.22351	0.493855	1.23337	0.424962	0.244837
Q99445	Glycosyl-phosphatidylinositol-anchored molecule-like protein OS=Homo sapiens GN=GML PE=2 SV=1 - [GML_HUMAN]	3.8	1	1	1	158	17.7178	6.48096	1.02424	0.947365	0.917696	0.9631	1.03858	1.07923	0.826344	0.981385	0.981368	0.839434
Q15149	Plectin OS=Homo sapiens GN=PLEC PE=1 SV=3 - [PLEC_HUMAN]	0.19	1	1	1	4684	531.466	5.96045	0.761573	0.765582	1.52734	1.01817	0.835355	1.06837	1.32436	1.07603	0.946226	0.852152
Q9H7K8	FLJ00064 protein (Fragment) OS=Homo sapiens GN=FLJ00064 PE=2 SV=1 - [Q9H7K8_HUMAN]	4.35	1	1	1	276	30.3631	5.65576	1.00485	0.984732	1.10286	1.03081	1.01752	1.3389	1.12424	1.16022	0.888463	0.270552
Q5IWS5	Intelectin 1 OS=Homo sapiens GN=ITLN1 PE=2 SV=1 - [Q5IWS5_HUMAN]	2.56	1	1	1	313	34.9553	5.8208	1.20814	1.42466	0.897511	1.17677	1.26032	0.93733	0.820843	1.00617	1.16956	0.445277
A8MXK9	Uncharacterized protein ENSP00000382033 OS=Homo sapiens PE=2 SV=2 - [YQ018_HUMAN]	9.64	1	1	5	166	17.9959	6.52197	0.94181	0.770296	0.85652	0.856209	0.937597	1.33469	0.933663	1.06865	0.801206	0.208814
P01854	Immunoglobulin heavy constant epsilon OS=Homo sapiens GN=IGHE PE=1 SV=1 - [IGHE_HUMAN]	1.87	1	1	1	428	46.9893	8.06006	0.503526	0.65906	0.800656	0.654414	0.723518	1.54806	0.613335	0.961639	0.680519	0.373811
C9JRZ8	Aldo-keto reductase family 1 member B15 OS=Homo sapiens GN=AKR1B15 PE=1 SV=2 - [AK1BF_HUMAN]	2.53	1	1	1	316	36.5138	6.69775	0.983614	0.884954	1.2193	1.02929	1.089	1.02313	0.947782	1.01997	1.00914	0.934932
Q5JSH3	WD repeat-containing protein 44 OS=Homo sapiens GN=WDR44 PE=1 SV=1 - [WDR44_HUMAN]	1.97	2	2	2	913	101.304	5.45264	1.00705	1.01225	1.31931	1.11287	1.03823	1.17761	1.07797	1.09794	1.0136	0.899707
B2RAH7	cDNA, FLJ94921, highly similar to Homo sapiens prolyl endopeptidase (PREP), mRNA OS=Homo sapiens PE=2 SV=1 - [B2RAH7_HUMAN]	1.13	1	1	1	710	80.682	5.85889	1.00616	0.897779	1.768	1.22398	1.05434	0.999364	1.11347	1.05572	1.15938	0.574746
A0A140T998	Proteasome subunit beta type-8 OS=Homo sapiens GN=PSMB8 PE=1 SV=1 - [A0A140T998_HUMAN]	3.17	1	1	1	252	27.8323	7.79639	0.980152	1.05487	0.957715	0.99758	1.02196	0.977003	1.03448	1.01115	0.986584	0.711582
B4DZM1	cDNA FLJ58310, highly similar to Homo sapiens trinucleotide repeat containing 15 (TNRC15), mRNA OS=Homo sapiens PE=2 SV=1 - [B4DZM1_HUMAN]	1.72	1	1	5	872	100.549	5.021	1.10447	1.03254	0.962325	1.03311	1.01736	1.03503	1.00866	1.02035	1.01251	0.775162
P22692	Insulin-like growth factor-binding protein 4 OS=Homo sapiens GN=IGFBP4 PE=1 SV=2 - [IBP4_HUMAN]	18.22	4	4	8	258	27.9155	7.15186	1.12104	1.02753	0.975927	1.0415	1.0192	0.963979	0.957919	0.980368	1.06235	0.260936
Q99592	Zinc finger and BTB domain-containing protein 18 OS=Homo sapiens GN=ZBTB18 PE=1 SV=1 - [ZBT18_HUMAN]	2.3	1	1	2	522	58.3173	5.69385	0.99783	1.2134	0.70948	0.97357	0.916985	1.18769	1.02499	1.04322	0.933235	0.696047
Q9NY41	Cartilage glycoprotein-39 (Fragment) OS=Homo sapiens GN=CHI3L1 PE=4 SV=1 - [Q9NY41_HUMAN]	17.39	1	1	1	46	5.08455	4.729	1.03067	1.2127	0.524433	0.9226	0.92825	1.21034	0.75698	0.96519	0.955873	0.870263
G3V5F2	Peptidyl-prolyl cis-trans isomerase FKBP3 OS=Homo sapiens GN=FKBP3 PE=1 SV=1 - [G3V5F2_HUMAN]	12.31	1	1	1	65	7.22069	8.57275	1.04079	1.02557	1.4281	1.16482	0.981456	0.85189	1.18285	1.0054	1.15857	0.383841
H0YC77	Annexin (Fragment) OS=Homo sapiens GN=ANXA6 PE=1 SV=1 - [H0YC77_HUMAN]	9.89	1	1	1	91	10.1281	7.21045	0.93293	0.76926	1.24016	0.980785	1.0269	1.20352	1.39485	1.20842	0.811624	0.261326
Q59H95	Flightless I homolog variant (Fragment) OS=Homo sapiens PE=2 SV=1 - [Q59H95_HUMAN]	1.09	1	1	1	1101	125.198	5.26221	0.841419	0.768214	1.41183	1.00715	0.758422	1.52933	1.46575	1.25117	0.80497	0.488268
P59665	Neutrophil defensin 1 OS=Homo sapiens GN=DEFA1 PE=1 SV=1 - [DEF1_HUMAN]	19.15	2	2	5	94	10.1942	6.99072	0.844976	0.867806	0.966735	0.893172	1.09237	1.30963	0.733454	1.04515	0.854587	0.427074
B4DKZ9	cDNA FLJ55705, highly similar to Threonyl-tRNA synthetase, cytoplasmic (EC 6.1.1.3) OS=Homo sapiens PE=2 SV=1 - [B4DKZ9_HUMAN]	1	1	1	1	602	70.3158	8.55811	0.945818	1.09943	1.41815	1.15447	0.590073	1.38839	1.2572	1.07855	1.07038	0.802191
B5MDP7	Papilin OS=Homo sapiens GN=PAPLN PE=1 SV=2 - [B5MDP7_HUMAN]	1.24	1	1	1	808	87.2188	7.29834	1.34305	1.01843	1.01521	1.12556	0.88331	0.958974	1.0163	0.952862	1.18125	0.208742
B4DJ06	cDNA FLJ56620 OS=Homo sapiens PE=2 SV=1 - [B4DJ06_HUMAN]	1.11	1	1	1	629	67.9044	4.90674	1.19673	1.07658	0.688152	0.987153	0.993797	0.980462	1.28689	1.08705	0.908102	0.614484
Q9UL86	Myosin-reactive immunoglobulin kappa chain variable region (Fragment) OS=Homo sapiens PE=2 SV=1 - [Q9UL86_HUMAN]	8.26	1	1	2	109	11.921	7.95752	0.80843	0.834823	0.584161	0.742471	1.06049	1.44228	0.682714	1.06183	0.699237	0.242779
O43150	Arf-GAP with SH3 domain, ANK repeat and PH domain-containing protein 2 OS=Homo sapiens GN=ASAP2 PE=1 SV=3 - [ASAP2_HUMAN]	1.39	1	1	1	1006	111.581	6.68311	1.04657	0.987123	1.12475	1.05282	1.15733	1.23153	0.935937	1.10826	0.949969	0.599324
P05771	Protein kinase C beta type OS=Homo sapiens GN=PRKCB PE=1 SV=4 - [KPCB_HUMAN]	2.68	2	2	2	671	76.8191	7.00537	0.988376	1.16828	1.16865	1.10844	0.989383	0.921317	1.03673	0.982477	1.12821	0.140847
F8VYZ1	Melanocyte protein PMEL (Fragment) OS=Homo sapiens GN=PMEL PE=1 SV=1 - [F8VYZ1_HUMAN]	5.22	1	1	3	134	15.0327	8.47021	0.554564	0.530398	0.561744	0.548902	0.967481	2.10611	0.555765	1.20978	0.453719	0.227261
D6RHH7	Corticotropin-releasing factor-binding protein OS=Homo sapiens GN=CRHBP PE=1 SV=1 - [D6RHH7_HUMAN]	3.78	1	1	1	238	27.0648	7.15186	1.17681	1.01658	1.16719	1.12019	0.866012	0.881983	1.05801	0.935334	1.19764	0.0831841
Q2TBE1	REG1A protein (Fragment) OS=Homo sapiens GN=REG1A PE=2 SV=2 - [Q2TBE1_HUMAN]	11.63	1	1	1	86	9.66934	4.14502	0.948787	1.05232	0.73338	0.911495	0.887728	0.867149	0.865054	0.87331	1.04373	0.706006
P49588	Alanine--tRNA ligase, cytoplasmic OS=Homo sapiens GN=AARS PE=1 SV=2 - [SYAC_HUMAN]	1.65	1	1	1	968	106.743	5.52881	0.95693	1.02415	0.937325	0.972801	1.04732	1.26127	0.981535	1.09671	0.887018	0.23382
E9PQ14	Dipeptidyl peptidase 3 (Fragment) OS=Homo sapiens GN=DPP3 PE=1 SV=1 - [E9PQ14_HUMAN]	3.95	1	1	1	177	19.8069	5.94775	0.889199	1.03578	1.33413	1.08637	1.06975	1.0598	1.19022	1.10659	0.981726	0.890159
D6R9K1	Claudin domain-containing protein 1 OS=Homo sapiens GN=CLDND1 PE=1 SV=1 - [D6R9K1_HUMAN]	10.34	1	1	1	87	9.68882	5.74463	1.21021	0.906756	1.28866	1.13521	0.943378	0.870148	1.30963	1.04105	1.09044	0.626696
Q6UVK1	Chondroitin sulfate proteoglycan 4 OS=Homo sapiens GN=CSPG4 PE=1 SV=2 - [CSPG4_HUMAN]	0.6	1	1	1	2322	250.382	5.46533	1.07898	0.83679	1.03369	0.983156	0.967902	1.24137	1.02973	1.07967	0.910611	0.434701
O15256	Parathymosin (Fragment) OS=Homo sapiens GN=PTMS PE=4 SV=1 - [O15256_HUMAN]	17.46	1	1	1	63	7.44688	9.5249	1.15214	1.23551	1.17273	1.18679	0.935767	0.828017	1.29358	1.01912	1.16453	0.30583
A0A0A7M1X5	Lamin B2, isoform CRA_b OS=Homo sapiens GN=LMNB2 PE=2 SV=1 - [A0A0A7M1X5_HUMAN]	2.48	1	1	1	483	53.5251	7.12256	1.29039	0.967653	1.50925	1.25577	0.694189	0.99163	0.912155	0.865991	1.45009	0.0972009
Q04760	Lactoylglutathione lyase OS=Homo sapiens GN=GLO1 PE=1 SV=4 - [LGUL_HUMAN]	8.15	2	2	2	184	20.7642	5.31299	0.918006	1.08403	1.11746	1.03983	1.06411	0.943803	1.02657	1.0115	1.02801	0.710922
Q6UWP8	Suprabasin OS=Homo sapiens GN=SBSN PE=1 SV=2 - [SBSN_HUMAN]	2.37	1	1	1	590	60.5046	7.00537	0.985763	1.30454	1.01958	1.10329	1.0015	0.738631	1.06215	0.934093	1.18114	0.298405
Q07507	Dermatopontin OS=Homo sapiens GN=DPT PE=1 SV=2 - [DERM_HUMAN]	5.47	1	1	1	201	23.9888	4.81787	1.21392	1.16756	1.18894	1.19014	0.844059	1.00753	1.33953	1.0637	1.11886	0.436432
Q15365	Poly(rC)-binding protein 1 OS=Homo sapiens GN=PCBP1 PE=1 SV=2 - [PCBP1_HUMAN]	6.18	2	2	2	356	37.4739	7.09326	1.065	1.23795	0.930647	1.07787	0.947832	0.908157	1.04047	0.965488	1.1164	0.311965
A6PVN7	Serine/threonine-protein phosphatase 2A activator (Fragment) OS=Homo sapiens GN=PTPA PE=1 SV=1 - [A6PVN7_HUMAN]	20.31	1	1	1	64	7.39591	8.47021	0.973699	1.05028	1.39562	1.13987	0.830062	1.08533	1.23212	1.04917	1.08644	0.631709
Q0ZCI2	Immunglobulin heavy chain variable region (Fragment) OS=Homo sapiens PE=4 SV=1 - [Q0ZCI2_HUMAN]	14.75	2	2	3	122	13.3157	9.1001	0.526741	0.38837	0.383957	0.433023	0.920907	2.38229	0.419358	1.24085	0.348972	0.24322
A7LNF5	Nucleobindin 2 (Fragment) OS=Homo sapiens GN=NUCB2 PE=2 SV=1 - [A7LNF5_HUMAN]	15.94	1	1	1	69	8.0212	4.83057	0.944692	0.889964	0.969671	0.934776	1.18525	0.90027	0.88293	0.989482	0.944712	0.616137
A0A068LKQ2	Ig heavy chain variable region (Fragment) OS=Homo sapiens PE=2 SV=1 - [A0A068LKQ2_HUMAN]	18.33	1	2	3	120	13.1496	9.0708	1.07695	0.605587	0.754027	0.812188	1.0339	1.61179	0.84876	1.16482	0.697266	0.259539
H7BZ09	Acidic leucine-rich nuclear phosphoprotein 32 family member A OS=Homo sapiens GN=ANP32A PE=1 SV=1 - [H7BZ09_HUMAN]	10.13	1	1	1	79	9.18189	9.18799	1.03993	0.880979	1.15056	1.02382	1.01885	1.11436	1.15924	1.09748	0.932884	0.452116
Q9NZN3	EH domain-containing protein 3 OS=Homo sapiens GN=EHD3 PE=1 SV=2 - [EHD3_HUMAN]	4.86	1	3	3	535	60.8487	6.56592	0.948566	1.03454	1.38342	1.12217	0.98977	0.919608	1.09966	1.00301	1.1188	0.451283
Q8WWQ8	Stabilin-2 OS=Homo sapiens GN=STAB2 PE=1 SV=3 - [STAB2_HUMAN]	0.55	1	1	1	2551	276.805	6.40479	0.683205	2.57383	0.52969	1.26224	0.783737	0.801445	0.919388	0.834856	1.51193	0.551798
A9UFC0	Caspase 14 OS=Homo sapiens GN=CASP14 PE=2 SV=1 - [A9UFC0_HUMAN]	5.37	1	1	2	242	27.6489	5.33838	1.02942	1.08497	0.799747	0.971378	0.921337	1.02618	1.0437	0.997071	0.974232	0.800796
Q7Z4C7	MSTP128 OS=Homo sapiens PE=2 SV=1 - [Q7Z4C7_HUMAN]	2.69	1	1	1	297	35.6381	5.41455	0.95021	0.873288	1.31148	1.04499	0.896766	1.20563	1.16614	1.08951	0.959139	0.802197
F4MH92	Ubiquitously transcribed tetratricopeptide repeat protein Y-linked transcript variant 62 OS=Homo sapiens GN=UTY PE=2 SV=1 - [F4MH92_HUMAN]	1.17	1	1	1	1367	151.469	7.48877	0.64448	0.30394	0.24233	0.396917	0.94137	2.53122	0.448842	1.30714	0.303652	0.228423
B4DN39	cDNA FLJ53065, highly similar to T-complex protein 1 subunit zeta OS=Homo sapiens PE=2 SV=1 - [B4DN39_HUMAN]	5.4	1	1	1	389	42.8875	6.62451	0.837784	1.08893	0.670245	0.865653	1.07688	1.02116	1.25369	1.11724	0.774812	0.147642
A5D8Z4	WNK1 protein (Fragment) OS=Homo sapiens GN=WNK1 PE=2 SV=1 - [A5D8Z4_HUMAN]	0.72	1	1	2	1537	159.423	6.52197	1.09196	0.798706	1.26356	1.05141	0.930902	0.996332	1.00061	0.975949	1.07732	0.612537
F8VXL2	Dynein light chain 1, cytoplasmic OS=Homo sapiens GN=DYNLL1 PE=1 SV=1 - [F8VXL2_HUMAN]	14.89	1	1	1	47	5.42265	5.33838	0.901274	0.917941	1.49699	1.1054	1.04905	0.877512	1.17732	1.03463	1.06841	0.757719
D3DXE4	KIAA0773 gene product, isoform CRA_b OS=Homo sapiens GN=KIAA0773 PE=4 SV=1 - [D3DXE4_HUMAN]	8.67	1	1	1	300	32.2158	4.42432	1.18279	0.839465		1.01113	0.870277	1.28089	1.1603	1.10382	0.916025	0.678649
Q96K23	cDNA FLJ14838 fis, clone OVARC1001726, weakly similar to APICAL-LIKE PROTEIN OS=Homo sapiens PE=2 SV=1 - [Q96K23_HUMAN]	2.33	1	1	1	258	27.9931	6.63916	0.31863	0.21703	0.220942	0.252201	1.68049	1.65424	0.292346	1.20903	0.208598	0.105803
T2HK55	NADH-ubiquinone oxidoreductase chain 1 OS=Homo sapiens GN=ndh1 PE=3 SV=1 - [T2HK55_HUMAN]	8.81	1	1	2	318	35.64	5.93506	1.29212	0.836648	0.944729	1.0245	1.53046	1.16019	0.434584	1.04175	0.983442	0.963052
A0A059QQL5	NADH-ubiquinone oxidoreductase chain 1 OS=Homo sapiens GN=ND1 PE=3 SV=1 - [A0A059QQL5_HUMAN]	3.14	1	1	2	318	35.551	5.93506	0.30408	0.254596	0.234995	0.264557	0.508907	2.48717	0.231342	1.07581	0.245915	0.317254
O00602	Ficolin-1 OS=Homo sapiens GN=FCN1 PE=1 SV=2 - [FCN1_HUMAN]	4.91	2	2	2	326	35.0561	6.85889	0.973946	0.978535	1.06093	1.00447	1.01172	1.21777	0.98233	1.07061	0.938223	0.45106
J3QS68	E3 ubiquitin-protein ligase RNF135 (Fragment) OS=Homo sapiens GN=RNF135 PE=1 SV=8 - [J3QS68_HUMAN]	6.33	1	1	1	158	17.4286	7.92822	0.906854	0.842667	1.0455	0.931672	1.10316	1.04729	0.774211	0.974887	0.955672	0.732618
B3KXG0	cDNA FLJ45349 fis, clone BRHIP3011460, highly similar to Homo sapiens Src homology 3 domain-containing guanine nucleotide exchange factor (SGEF), mRNA OS=Homo sapiens PE=2 SV=1 - [B3KXG0_HUMAN]	1.26	1	1	1	871	97.192	8.95361	1.04756	0.936438	1.12458	1.03619	0.979661	1.02208	0.995752	0.999165	1.03706	0.544546
F5GWB1	Coiled-coil domain-containing protein 91 OS=Homo sapiens GN=CCDC91 PE=1 SV=1 - [F5GWB1_HUMAN]	2.25	1	1	1	267	29.3277	4.83057	1.14213	1.15811	0.867309	1.05585	0.81598	1.02416	1.033	0.957714	1.10247	0.452558
Q96NM1	HCG1990367 OS=Homo sapiens GN=FLJ30594 PE=2 SV=1 - [Q96NM1_HUMAN]	3.77	1	1	1	159	17.3529	9.64209	0.890873	0.931885	0.992029	0.938262	0.983624	1.17201	0.88625	1.01396	0.925342	0.44232
K7EIU0	Hsp90 co-chaperone Cdc37 (Fragment) OS=Homo sapiens GN=CDC37 PE=1 SV=1 - [K7EIU0_HUMAN]	6.73	1	1	1	104	11.6478	5.0083	1.05909	1.06114	1.2722	1.13081	1.01651	0.936755	1.243	1.06542	1.06137	0.602491
Q6PCC8	URB2 protein (Fragment) OS=Homo sapiens GN=URB2 PE=2 SV=1 - [Q6PCC8_HUMAN]	0.63	1	1	1	957	107.247	7.91357	0.425335	0.269515	0.420174	0.371675	1.46077	1.79895	0.44749	1.23574	0.300772	0.102329
Q8WU23	POLE protein OS=Homo sapiens PE=2 SV=1 - [Q8WU23_HUMAN]	3.78	1	1	2	370	41.4852	4.80518	1.27604	0.979456	1.42461	1.2267	1.02652	0.813909	0.815951	0.885459	1.38538	0.0833401
B4E006	cDNA FLJ53119, highly similar to ADP-ribosyl cyclase 1 (EC 3.2.2.5) OS=Homo sapiens PE=2 SV=1 - [B4E006_HUMAN]	11.25	1	1	1	160	17.9172	8.96826	0.718171	0.572195	0.560411	0.616926	1.13909	1.43079	0.698491	1.08946	0.566268	0.0969398
A0A0A0N0L2	IL6ST isoform 4 OS=Homo sapiens GN=IL6ST PE=2 SV=1 - [A0A0A0N0L2_HUMAN]	4.55	4	4	5	857	96.2157	5.89697	0.979239	1.02891	1.00447	1.00421	1.06041	1.04231	0.905401	1.00271	1.0015	0.977901
B4DIR5	cDNA FLJ56026 OS=Homo sapiens PE=2 SV=1 - [B4DIR5_HUMAN]	0.61	1	1	2	1147	127.054	6.7124	1.08797	1.17222	1.02806	1.09608	0.886054	1.03928	0.912837	0.946058	1.15858	0.0761689
H7C557	Multiple epidermal growth factor-like domains protein 6 OS=Homo sapiens GN=MEGF6 PE=1 SV=2 - [H7C557_HUMAN]	1.89	1	1	1	1323	138.306	6.62451	1.17377	1.09901	0.89093	1.05457	0.931933	0.839554	1.05574	0.94241	1.11902	0.346725
A8K4W5	cDNA FLJ76813, highly similar to Homo sapiens acetyl-Coenzyme A acetyltransferase 2 (acetoacetyl Coenzyme A thiolase), mRNA OS=Homo sapiens PE=2 SV=1 - [A8K4W5_HUMAN]	2.77	1	1	1	397	41.3524	6.91748	0.891672	1.1176	0.825907	0.94506	0.903829	1.38355	0.902243	1.06321	0.888877	0.553526
Q6ZRP2	cDNA FLJ46208 fis, clone TESTI4010979 OS=Homo sapiens PE=2 SV=1 - [Q6ZRP2_HUMAN]	4.32	1	1	1	139	15.3612	9.02686	0.924903	0.969511	1.37871	1.09104	0.99573	0.948716	1.15776	1.03407	1.0551	0.736135
Q1LZN2	NOMO3 protein (Fragment) OS=Homo sapiens GN=NOMO3 PE=2 SV=1 - [Q1LZN2_HUMAN]	0.87	1	1	1	807	89.7607	5.66846	1.0989	0.9451	0.994216	1.01274	0.928774	1.03051	0.923837	0.96104	1.0538	0.416792
B4E2Q7	cDNA FLJ51461, highly similar to Cohesin subunit SA-1 OS=Homo sapiens PE=2 SV=1 - [B4E2Q7_HUMAN]	0.83	1	1	1	842	96.5796	5.2749	0.963991	0.932953	1.02644	0.974463	1.1111	0.897814	1.0866	1.03184	0.944394	0.474564
A0A0B4J1R4	4-hydroxyphenylpyruvate dioxygenase OS=Homo sapiens GN=HPD PE=1 SV=1 - [A0A0B4J1R4_HUMAN]	2.04	1	1	1	393	44.9359	7.00537	0.817835	0.851501	0.868719	0.846018	0.984254	1.66496	0.867065	1.17209	0.721802	0.260816
Q9C0D2	Centrosomal protein of 295 kDa OS=Homo sapiens GN=CEP295 PE=1 SV=4 - [CE295_HUMAN]	0.38	1	1	1	2601	294.996	5.99854	0.717878	1.22817	1.39449	1.11351	1.16259	2.07412	0.900522	1.37908	0.807432	0.552274
M0R261	6-phosphogluconolactonase (Fragment) OS=Homo sapiens GN=PGLS PE=1 SV=1 - [M0R261_HUMAN]	6.94	1	1	1	216	22.9821	5.85889	0.696086	0.749149	0.779324	0.74152	1.25071	1.2945	0.809836	1.11835	0.663047	0.0739407
A9UK01	Rho GTPase activating protein OS=Homo sapiens PE=2 SV=1 - [A9UK01_HUMAN]	1.96	1	1	1	663	74.9309	6.17627	0.875759	1.30481	1.10878	1.09645	1.12403	0.838651	1.19643	1.05304	1.04123	0.805732
Q3LIE3	Uncharacterized protein Nbla04137 (Fragment) OS=Homo sapiens GN=Nbla04137 PE=2 SV=1 - [Q3LIE3_HUMAN]	3.11	1	1	1	289	33.326	5.21143	1.26183	1.01628	1.07359	1.11724	0.991493	0.974433	0.904247	0.956724	1.16777	0.111414
Q2TBD1	NEBL protein OS=Homo sapiens GN=NEBL PE=2 SV=1 - [Q2TBD1_HUMAN]	1.12	1	1	3	716	82.5371	8.39697	0.89175	0.823381	0.85874	0.857957	1.02187	1.12747	0.801373	0.983569	0.872289	0.269472
B4DQW7	cDNA FLJ54378, highly similar to Golgin subfamily B member 1 (Fragment) OS=Homo sapiens PE=2 SV=1 - [B4DQW7_HUMAN]	0.9	1	1	2	889	101.865	4.7417	1.15273	1.00182	1.05991	1.07149	0.957187	0.754147	1.06421	0.925182	1.15814	0.221003
Q14191	Werner syndrome ATP-dependent helicase OS=Homo sapiens GN=WRN PE=1 SV=2 - [WRN_HUMAN]	0.84	1	1	1	1432	162.357	6.34131	1.18897	1.56244	2.07214	1.60785	0.60635	0.505019	1.70358	0.938316	1.71355	0.220278
B4DUR8	T-complex protein 1 subunit gamma OS=Homo sapiens GN=CCT3 PE=1 SV=1 - [B4DUR8_HUMAN]	1.6	1	1	1	500	55.6387	5.64307	1.00761	1.0336	1.39065	1.14395	0.980228	0.940202	1.11864	1.01302	1.12924	0.386674
U3KQT1	S-formylglutathione hydrolase (Fragment) OS=Homo sapiens GN=ESD PE=1 SV=1 - [U3KQT1_HUMAN]	5.83	1	1	1	120	13.1007	8.68994	0.829983	1.392	1.19946	1.14048	1.15407	1.20161	1.0059	1.12053	1.01781	0.914776
Q53TG4	Uncharacterized protein NCK2 (Fragment) OS=Homo sapiens GN=NCK2 PE=4 SV=1 - [Q53TG4_HUMAN]	2.63	1	1	1	304	33.9428	6.3667	0.995827	0.737747	0.857851	0.863808	1.09413	0.937932	0.864189	0.965416	0.894753	0.370338
A0A0C4DH39	Immunoglobulin heavy variable 1-58 OS=Homo sapiens GN=IGHV1-58 PE=3 SV=1 - [HV158_HUMAN]	5.98	1	1	1	117	12.9965	9.24658	0.392044	0.183143	0.197948	0.257712	0.706892	3.25522	0.23442	1.39884	0.184232	0.291781
H0Y512	Adipocyte plasma membrane-associated protein (Fragment) OS=Homo sapiens GN=APMAP PE=1 SV=1 - [H0Y512_HUMAN]	1.71	1	1	1	409	45.3761	5.65576	0.982495	0.933292	1.12456	1.01345	1.45816	1.13396	1.0829	1.22501	0.8273	0.180967
H0YA14	cGMP-specific 3',5'-cyclic phosphodiesterase (Fragment) OS=Homo sapiens GN=PDE5A PE=1 SV=1 - [H0YA14_HUMAN]	8.11	1	1	1	185	21.537	6.32861	1.09266	1.03315	1.23984	1.12188	0.975915	0.94982	1.02215	0.982629	1.14172	0.0987041
B4DT06	Xylosyltransferase 2 OS=Homo sapiens GN=XYLT2 PE=1 SV=1 - [B4DT06_HUMAN]	2.07	1	1	1	676	75.4655	9.02686	1.15735	0.987374	0.916318	1.02035	0.891853	0.901476	0.959544	0.917625	1.11195	0.240383
B1B5R8	N-acylsphingosine amidohydrolase 1 (Fragment) OS=Homo sapiens GN=ASAH1 PE=4 SV=1 - [B1B5R8_HUMAN]	9.2	1	1	1	174	19.6322	7.43018	1.00667	0.736856	0.925135	0.889555	0.911234	1.55538	0.723027	1.06321	0.836666	0.547133
B7Z6W6	cDNA FLJ52268, highly similar to Intercellular adhesion molecule 3 OS=Homo sapiens PE=2 SV=1 - [B7Z6W6_HUMAN]	6.62	1	1	1	151	16.8274	7.06396	1.02049	0.870789	1.0136	0.968292	0.881374	1.24944	1.01304	1.04795	0.923986	0.537339
B3KXB6	cDNA FLJ45101 fis, clone BRAWH3032298, highly similar to Tenascin-N OS=Homo sapiens PE=2 SV=1 - [B3KXB6_HUMAN]	1.85	1	1	1	1299	143.815	5.63037	0.641318	1.30817	0.601026	0.850172	1.22233	1.17545	0.441928	0.946569	0.898161	0.791564
Q9UFH1	Uncharacterized protein DKFZp434J0650 (Fragment) OS=Homo sapiens GN=DKFZp434J0650 PE=2 SV=1 - [Q9UFH1_HUMAN]	6.6	1	1	1	106	12.0877	8.57275	0.521316	0.555722	0.597587	0.558209	1.69509	1.46923	0.509317	1.22455	0.455848	0.141276
O95755	Ras-related protein Rab-36 OS=Homo sapiens GN=RAB36 PE=2 SV=2 - [RAB36_HUMAN]	3.3	1	1	1	333	36.2994	7.85498	1.14435	0.871439	1.07839	1.03139	1.00375	0.776519	1.06608	0.948785	1.08707	0.530411
B3KPC9	cDNA FLJ31622 fis, clone NT2RI2003220, highly similar to Zinc finger protein 337 OS=Homo sapiens PE=2 SV=1 - [B3KPC9_HUMAN]	1.77	1	1	1	622	71.9646	9.70068	0.789323	1.47258	0.831777	1.03123	1.3817	0.901945	0.479119	0.920922	1.11978	0.763072
H0YIJ6	Phosphatidylinositol 5-phosphate 4-kinase type-2 gamma (Fragment) OS=Homo sapiens GN=PIP4K2C PE=1 SV=8 - [H0YIJ6_HUMAN]	5.97	1	1	2	134	15.5359	5.10986	0.982591	1.17119	0.969756	1.04118	0.950788	0.964568	0.89071	0.935356	1.11314	0.199607
A0N5G7	Rheumatoid factor D5 heavy chain (Fragment) OS=Homo sapiens GN=VH3 PE=2 SV=1 - [A0N5G7_HUMAN]	9.24	1	1	1	119	12.9784	8.93896	0.835613	0.648852	0.710482	0.731649	0.967896	1.63033	0.688392	1.09554	0.667843	0.270263
X5D7P8	Serine threonine kinase 39 isoform D (Fragment) OS=Homo sapiens GN=STK39 PE=2 SV=1 - [X5D7P8_HUMAN]	3.58	1	1	1	475	52.2329	6.25244	0.701342	1.05497	1.08704	0.947786	1.04725	1.01898	1.06216	1.0428	0.908889	0.486976
Q658S4	Uncharacterized protein DKFZp666N164 (Fragment) OS=Homo sapiens GN=DKFZp666N164 PE=2 SV=1 - [Q658S4_HUMAN]	6.56	1	1	1	122	13.4158	8.88037	0.940931	0.658526	0.965665	0.855041	0.840419	1.09056	0.79945	0.910143	0.939457	0.702201
Q6PID9	Aggrecan OS=Homo sapiens GN=ACAN PE=1 SV=1 - [Q6PID9_HUMAN]	1.94	1	1	1	721	79.565	5.05908	0.999925	1.17167	0.950131	1.04057	1.07154	0.952364	0.966498	0.9968	1.04391	0.599706
Q86XI8	Uncharacterized protein ZSWIM9 OS=Homo sapiens GN=ZSWIM9 PE=1 SV=2 - [ZSWM9_HUMAN]	1.59	1	1	1	627	70.029	8.57275	0.716887	0.562414	0.637306	0.638869	0.999989	1.97746	0.699244	1.22557	0.521285	0.205436
Q9H2L9	AD034 OS=Homo sapiens PE=2 SV=1 - [Q9H2L9_HUMAN]	1.83	1	1	1	327	38.0191	7.13721	0.443483	2.00566	0.122681	0.857276	0.477233	1.34213	1.41012	1.07649	0.79636	0.754518
I6L957	HNRNPA2B1 protein OS=Homo sapiens GN=HNRNPA2B1 PE=2 SV=1 - [I6L957_HUMAN]	4.02	1	1	1	249	28.3941	4.85596	1.14868	0.945555	1.66125	1.25183	0.622568	0.627911	1.99603	1.08217	1.15677	0.753377
A1L159	IKBKB protein (Fragment) OS=Homo sapiens GN=IKBKB PE=2 SV=1 - [A1L159_HUMAN]	8.33	1	1	1	132	14.8573	4.83057	1.21864	1.34565	0.526342	1.03021	1.0308	0.77219	1.01994	0.940977	1.09483	0.756081
C9JBE7	WD repeat-containing protein 53 OS=Homo sapiens GN=WDR53 PE=1 SV=1 - [C9JBE7_HUMAN]	4.02	1	1	1	199	21.9611	7.40088	0.687761	1.11453	0.924564	0.90895	0.742269	2.668	1.31716	1.57581	0.576815	0.31718
Q9Y657	Spindlin-1 OS=Homo sapiens GN=SPIN1 PE=1 SV=3 - [SPIN1_HUMAN]	5.34	1	1	1	262	29.5818	6.96143	1.10224	0.975874	1.07293	1.05035	0.854606	1.15676	0.986004	0.999122	1.05127	0.61992
B4E1R1	cDNA FLJ52389, highly similar to Alcohol dehydrogenase 1B (EC 1.1.1.1) OS=Homo sapiens PE=2 SV=1 - [B4E1R1_HUMAN]	4.82	1	1	1	166	17.9103	8.06006	0.951897	0.892951	0.832708	0.892519	0.801088	1.47881	0.876376	1.05209	0.848327	0.50329
C9JXF9	Insulin-like growth factor-binding protein 1 OS=Homo sapiens GN=IGFBP1 PE=1 SV=1 - [C9JXF9_HUMAN]	2.72	1	1	1	257	27.6533	5.2876	1.5101	0.568063	0.928142	1.0021	0.997337	1.05795	0.92268	0.992656	1.00951	0.974452
Q9P172	PRO2281 OS=Homo sapiens PE=2 SV=1 - [Q9P172_HUMAN]	5.17	1	1	1	329	37.2228	5.21143	1.02456	0.99694	0.871201	0.964234	0.977832	1.11917	1.13215	1.07638	0.89581	0.176102
A2VCK2	Doublecortin domain-containing protein 2B OS=Homo sapiens GN=DCDC2B PE=1 SV=1 - [DCD2B_HUMAN]	3.72	1	1	1	349	37.6414	8.79248	0.83208	1.16589	1.19039	1.06279	0.995123	1.45869	0.950037	1.13462	0.936694	0.736967
F5H726	T-complex protein 1 subunit alpha (Fragment) OS=Homo sapiens GN=TCP1 PE=1 SV=1 - [F5H726_HUMAN]	10.99	1	1	1	91	9.5131	4.70361	0.936373	0.888345	1.02843	0.95105	1.1048	1.47773	0.944	1.17551	0.809053	0.241336
G3V357	Ribonuclease pancreatic OS=Homo sapiens GN=RNASE1 PE=1 SV=1 - [G3V357_HUMAN]	6.03	1	1	1	116	13.0409	7.91357	1.07822	0.719101	0.774719	0.857347	1.00969	1.17129	0.730595	0.970525	0.883384	0.542801
D3DSP9	Fibrinogen-like 1, isoform CRA_d OS=Homo sapiens GN=FGL1 PE=4 SV=1 - [D3DSP9_HUMAN]	3.56	1	1	1	253	29.4179	5.80811	1.45946	1.05961	1.41159	1.31022	0.832765	0.904143	1.05162	0.929511	1.40958	0.054716
B4DE30	cDNA FLJ51711, highly similar to T-complex protein 1 subunit epsilon OS=Homo sapiens PE=2 SV=1 - [B4DE30_HUMAN]	1.72	1	1	1	466	51.5117	5.52881	1.09915	1.05321	1.36307	1.17181	0.957078	1.10784	1.15314	1.07268	1.09241	0.430954
Q16393	LFA-3 (Fragment) OS=Homo sapiens PE=2 SV=1 - [Q16393_HUMAN]	8.4	1	1	1	119	13.723	7.37158	1.22288	1.0715	0.938246	1.07754	0.901271	0.911781	1.14589	0.986314	1.09249	0.47062
H0YLI4	LRP chaperone MESD OS=Homo sapiens GN=MESD PE=1 SV=1 - [H0YLI4_HUMAN]	11.25	1	1	1	80	8.69543	7.07861	1.10864	1.07939	1.39531	1.19445	0.855272	0.925852	1.19659	0.992573	1.20338	0.235837
K7EQ37	Protein unc-13 homolog D (Fragment) OS=Homo sapiens GN=UNC13D PE=1 SV=1 - [K7EQ37_HUMAN]	4.12	1	1	1	267	30.6616	6.16357	0.987893	0.980509	1.13153	1.03331	0.958419	1.0857	1.05436	1.03283	1.00047	0.994167
A9JR48	SALL3 protein OS=Homo sapiens GN=SALL3 PE=1 SV=1 - [A9JR48_HUMAN]	1.67	1	1	1	959	101.47	7.31299	1.37708	1.0928	1.03192	1.16726	0.918901	0.759623	0.868053	0.848859	1.3751	0.0519944
B7Z4J0	cDNA FLJ55790, highly similar to CLIP-associating protein 1 OS=Homo sapiens PE=2 SV=1 - [B7Z4J0_HUMAN]	2.73	1	1	1	440	48.487	6.72705	1.30127	1.04393	1.2703	1.20517	0.933423	0.957308	1.05337	0.981366	1.22805	0.065756
A2N0S5	VH6DJ protein (Fragment) OS=Homo sapiens GN=VH6DJ PE=2 SV=1 - [A2N0S5_HUMAN]	14.91	1	2	11	114	12.5221	8.88037	0.82653	1.09744	0.562843	0.828937	1.08128	1.53375	0.815998	1.14368	0.724802	0.293086
A0A087X2B3	Neuronal cell adhesion molecule OS=Homo sapiens GN=NRCAM PE=1 SV=1 - [A0A087X2B3_HUMAN]	1.43	1	1	1	771	85.2943	5.52881	1.09128	0.962444	1.28054	1.11142	0.964183	1.1792	1.01849	1.05396	1.05452	0.636981
H0Y984	ADP-ribosyl cyclase/cyclic ADP-ribose hydrolase 2 (Fragment) OS=Homo sapiens GN=BST1 PE=1 SV=1 - [H0Y984_HUMAN]	8.6	2	2	2	186	21.068	5.57959	0.69533	0.818086	0.64172	0.718379	0.755989	0.651301	2.35231	1.2532	0.573236	0.388135
Q9UBQ7	Glyoxylate reductase/hydroxypyruvate reductase OS=Homo sapiens GN=GRHPR PE=1 SV=1 - [GRHPR_HUMAN]	5.49	1	1	1	328	35.6457	7.38623	1.0777	0.828239	0.997304	0.967747	1.02453	0.968952	0.914517	0.969334	0.998363	0.985137
B7Z7F6	cDNA FLJ51136, weakly similar to Aquaporin-7 OS=Homo sapiens PE=2 SV=1 - [B7Z7F6_HUMAN]	5.67	1	1	1	141	15.4289	9.65674	0.86865	0.915857	0.860607	0.881705	1.06261	1.0898	0.919832	1.02408	0.860971	0.0621565
Q9NY43	BarH-like 2 homeobox protein OS=Homo sapiens GN=BARHL2 PE=1 SV=2 - [BARH2_HUMAN]	3.36	1	1	1	387	41.9549	8.54346	1.19441	1.00385	0.831378	1.00988	1.07705	0.847763	1.04894	0.991253	1.01879	0.890761
M0QZP7	Distal membrane-arm assembly complex protein 2 (Fragment) OS=Homo sapiens GN=DMAC2 PE=1 SV=1 - [M0QZP7_HUMAN]	7.33	1	1	2	150	16.9353	5.04639	0.929103	1.13885	0.790579	0.952845	1.1267	0.890033	0.896493	0.971077	0.981225	0.893376
P58166	Inhibin beta E chain OS=Homo sapiens GN=INHBE PE=1 SV=1 - [INHBE_HUMAN]	3.43	1	1	1	350	38.537	9.24658	0.983855	0.859116	0.891932	0.911634	0.845482	1.51738	0.734995	1.03262	0.882836	0.650302
Q53SQ6	Uncharacterized protein PTD004 (Fragment) OS=Homo sapiens GN=PTD004 PE=4 SV=1 - [Q53SQ6_HUMAN]	6.57	1	1	1	213	24.788	9.18799	0.962466	1.08911	1.35592	1.13583	0.99069	0.881892	1.10394	0.992174	1.14479	0.339247
B3KUR3	cDNA FLJ40459 fis, clone TESTI2041800, highly similar to BISPHOSPHOGLYCERATE MUTASE (EC 5.4.2.4) OS=Homo sapiens PE=2 SV=1 - [B3KUR3_HUMAN]	11.16	2	2	2	242	27.9744	5.84619	0.718432	1.17493	0.560857	0.818072	1.13448	0.832434	1.03401	1.00031	0.81782	0.423077
H9E7F6	Cytochrome c oxidase subunit 1 OS=Homo sapiens GN=COX1 PE=3 SV=1 - [H9E7F6_HUMAN]	7.21	1	1	1	513	57.014	6.69775	1.3649	1.61881	0.770532	1.25142	1.46868	0.6331		1.05089	1.19081	0.685915
B3KSD3	cDNA FLJ36024 fis, clone TESTI2016667, highly similar to Homo sapiens zinc finger CCCH-type containing 12A (ZC3H12A), mRNA OS=Homo sapiens PE=2 SV=1 - [B3KSD3_HUMAN]	1.52	1	1	1	394	41.7097	8.14795	1.03691	1.01828	1.366	1.1404	0.958946	0.93141	1.14889	1.01308	1.12567	0.389456
E9PM35	Beta-arrestin-1 (Fragment) OS=Homo sapiens GN=ARRB1 PE=1 SV=8 - [E9PM35_HUMAN]	19.46	3	3	4	257	29.1501	7.40088	0.961385	1.00224	1.14893	1.03752	1.13528	0.904842	1.13423	1.05812	0.980533	0.839745
K7ELP7	Keratin, type I cytoskeletal 17 (Fragment) OS=Homo sapiens GN=KRT17 PE=1 SV=1 - [K7ELP7_HUMAN]	12.24	1	1	8	49	5.50775	4.58936	0.372209	0.283213	0.333604	0.329675	1.54761	1.4853	0.378148	1.13702	0.289947	0.101286
K7ESI1	DNA repair protein RAD51 homolog 4 (Fragment) OS=Homo sapiens GN=RAD51D PE=4 SV=1 - [K7ESI1_HUMAN]	24.42	1	1	1	86	9.13257	7.07861	0.756704	1.27036	0.555274	0.860781	1.31203	1.09069	1.18396	1.19556	0.719982	0.20661
H0Y9C7	N(4)-(beta-N-acetylglucosaminyl)-L-asparaginase (Fragment) OS=Homo sapiens GN=AGA PE=1 SV=8 - [H0Y9C7_HUMAN]	14.94	2	2	2	154	16.9473	6.26514	0.89685	1.26658	0.733315	0.965583	0.959769	1.14422	0.831885	0.978625	0.986673	0.946291
B7Z570	cDNA FLJ53078, highly similar to Splicing factor, arginine/serine-rich 1 OS=Homo sapiens PE=2 SV=1 - [B7Z570_HUMAN]	11.19	1	1	2	143	16.2101	11.0923	0.924417	1.03388	0.749523	0.902608	0.972597	0.919266	0.799963	0.897275	1.00594	0.958905
C5IJI6	Glutamate receptor 1 variant (Fragment) OS=Homo sapiens GN=GRIA1 PE=2 SV=1 - [C5IJI6_HUMAN]	27.12	1	1	1	59	6.62046	9.92041	1.13315	1.32676	0.732173	1.06403	0.965708	0.920571	0.786975	0.891085	1.19408	0.398444
Q8NF80	FLJ00275 protein (Fragment) OS=Homo sapiens GN=FLJ00275 PE=2 SV=1 - [Q8NF80_HUMAN]	6.02	2	2	2	382	41.0253	6.04932	1.03651	0.975404	0.932172	0.981362	1.25153	0.913754	0.94876	1.03802	0.945422	0.637903
Q59EJ0	Aldehyde dehydrogenase 1A1 variant (Fragment) OS=Homo sapiens PE=2 SV=1 - [Q59EJ0_HUMAN]	5.76	2	2	2	330	35.7572	6.23975	0.897543	0.890365	0.702531	0.830146	1.00469	1.1949	0.804615	1.0014	0.828985	0.256589
B8ZWD8	Diazepam binding inhibitor, splice form 1D(1) OS=Homo sapiens GN=DBI PE=2 SV=1 - [B8ZWD8_HUMAN]	12.7	1	1	1	63	7.2677	8.93896	1.07879	1.04517	1.00076	1.04158	1.03035	1.02144	1.00187	1.01789	1.02327	0.381494
Q3ZCT3	SPON1 protein (Fragment) OS=Homo sapiens GN=SPON1 PE=2 SV=1 - [Q3ZCT3_HUMAN]	6.61	1	1	1	257	29.5897	7.94287	1.21515	1.02344	0.902425	1.04701	0.922398	1.25521	0.741328	0.97298	1.07608	0.695473
Q9UH97	Hematopoietic progenitor cell antigen CD34 (Fragment) OS=Homo sapiens GN=CD34 PE=2 SV=1 - [Q9UH97_HUMAN]	4.15	1	1	1	193	20.6966	7.15186	1.33152	0.979274	0.947839	1.08621	0.94626	1.05314	1.05987	1.01976	1.06516	0.632025
H3BPC3	Structure-specific endonuclease subunit SLX1 OS=Homo sapiens GN=SLX1A PE=4 SV=1 - [H3BPC3_HUMAN]	13.58	1	1	1	81	8.92773	11.7808	0.960777	0.70476	0.173306	0.612948	1.21573	1.51373	0.747048	1.15884	0.528934	0.165091
D6R9W4	Drebrin (Fragment) OS=Homo sapiens GN=DBN1 PE=1 SV=1 - [D6R9W4_HUMAN]	2.52	1	1	1	317	36.449	5.13525	1.08161	1.04921	1.10398	1.07827	0.932728	1.03738	1.05989	1.01	1.06759	0.181693
F2Z2G5	WAP four-disulfide core domain protein 3 OS=Homo sapiens GN=WFDC3 PE=4 SV=1 - [F2Z2G5_HUMAN]	9.57	1	1	1	94	10.0289	5.94775	1.04452	1.08536	0.989203	1.03969	1.05823	1.16036	0.909671	1.04276	0.997061	0.97052
O43876	Olfactory receptor (Fragment) OS=Homo sapiens GN=OR17-130 PE=3 SV=1 - [O43876_HUMAN]	6.02	1	1	1	216	23.673	6.88818	1.25448	1.03209	0.763529	1.0167	0.852147	0.988936	0.986802	0.942628	1.07858	0.645118
D6RC18	Pre-mRNA-splicing factor ISY1 homolog OS=Homo sapiens GN=ISY1 PE=1 SV=1 - [D6RC18_HUMAN]	5.65	1	1	1	124	14.3024	8.27979	1.16678	1.09448	0.862238	1.04116	0.983359	0.954012	0.951596	0.962989	1.08118	0.44531
H0Y8R5	Receptor of-activated protein C kinase 1 (Fragment) OS=Homo sapiens GN=RACK1 PE=1 SV=1 - [H0Y8R5_HUMAN]	9.42	1	1	2	138	15.1904	7.31299	1.38657	0.951703	0.863936	1.0674	1.21625	0.821321	1.02986	1.02248	1.04394	0.831451
H7BXD8	Galectin (Fragment) OS=Homo sapiens GN=LGALS8 PE=1 SV=1 - [H7BXD8_HUMAN]	5.71	1	1	1	175	19.5563	9.62744	0.916764	1.22854	1.11719	1.0875	0.953146	0.835481	0.882099	0.890242	1.22158	0.112886
C9JZG1	Eukaryotic translation initiation factor 3 subunit B (Fragment) OS=Homo sapiens GN=EIF3B PE=1 SV=1 - [C9JZG1_HUMAN]	4.64	1	1	1	302	33.362	4.36084	0.976535	0.810892	1.41821	1.06855	1.03096	0.856628	1.5217	1.13643	0.940265	0.813368
P07477	Trypsin-1 OS=Homo sapiens GN=PRSS1 PE=1 SV=1 - [TRY1_HUMAN]	11.34	2	2	3	247	26.5411	6.50732	1.31611	0.801288	1.11874	1.07871	0.980154	1.04066	1.12275	1.04785	1.02945	0.852424
F8VY02	Endoplasmic reticulum resident protein 29 OS=Homo sapiens GN=ERP29 PE=1 SV=1 - [F8VY02_HUMAN]	15.63	2	2	2	160	18.1044	8.00146	0.924145	1.11764	1.16557	1.06912	0.987026	0.948014	1.26058	1.06521	1.00367	0.976149
B7Z5E9	cDNA FLJ58043, highly similar to Estrogen-related receptor gamma OS=Homo sapiens PE=2 SV=1 - [B7Z5E9_HUMAN]	3.3	1	1	1	273	31.0593	6.65381	0.918446	0.994958	1.16824	1.02721	0.94336	1.07018	0.933392	0.982312	1.04571	0.629226
F5H0N4	Peptidylprolyl isomerase (Fragment) OS=Homo sapiens GN=FKBP2 PE=1 SV=1 - [F5H0N4_HUMAN]	6.86	1	1	1	102	11.2829	9.24658	1.02035	1.04244	1.44332	1.1687	1.00095	1.05185	1.18553	1.07945	1.08269	0.579142
H3BRV9	Nuclear transport factor 2 (Fragment) OS=Homo sapiens GN=NUTF2 PE=1 SV=1 - [H3BRV9_HUMAN]	5.61	1	1	2	107	12.151	5.33838	0.949055	0.95267	1.24672	1.04948	0.976478	1.18064	1.10281	1.08664	0.965799	0.763105
I3V9V3	Dipeptidyl peptidase 1 isoform a preproprotein (Fragment) OS=Homo sapiens GN=CTSC PE=4 SV=1 - [I3V9V3_HUMAN]	14.55	1	1	1	55	6.17992	7.28369	0.942869	1.28472	0.97187	1.06649	1.00294	0.881034	1.00123	0.961734	1.10892	0.419914
Q5J908	HCCR-binding protein 2 OS=Homo sapiens PE=2 SV=1 - [Q5J908_HUMAN]	7.83	1	1	1	115	12.5784	4.90674	0.930618	1.08608	1.3625	1.1264	0.973546	0.908567	1.48385	1.12199	1.00393	0.985058
H3BMF9	Semaphorin-7A (Fragment) OS=Homo sapiens GN=SEMA7A PE=1 SV=1 - [H3BMF9_HUMAN]	16.25	1	1	1	80	9.57572	6.04932	0.909065	0.902775	1.00002	0.937287	1.34078	1.06761	1.11924	1.17588	0.797096	0.0560263
H0YJT7	A-kinase anchor protein 6 (Fragment) OS=Homo sapiens GN=AKAP6 PE=4 SV=1 - [H0YJT7_HUMAN]	5.93	1	1	1	118	13.8631	9.74463	1.27508	0.898193	1.22438	1.13255	1.02596	0.954156	0.817637	0.932584	1.21442	0.207025
F5GYN4	Ubiquitin thioesterase OTUB1 OS=Homo sapiens GN=OTUB1 PE=1 SV=1 - [F5GYN4_HUMAN]	4.98	1	1	1	241	28.033	5.2876	1.04943	0.934799	1.31582	1.10002	0.984604	1.14178	1.25722	1.12787	0.975304	0.849642
E5RIR0	Fatty acid-binding protein, adipocyte OS=Homo sapiens GN=FABP4 PE=1 SV=1 - [E5RIR0_HUMAN]	30.77	1	1	1	39	4.57414	4.43701	1.11124	0.874734	0.88033	0.955434	0.862069	1.03651	1.14921	1.01593	0.940451	0.624409
B8ZZQ6	Prothymosin alpha OS=Homo sapiens GN=PTMA PE=1 SV=1 - [B8ZZQ6_HUMAN]	13.08	1	1	1	107	11.7518	3.81494	1.23036	1.03283	1.63583	1.29967	0.800909	0.531426	1.85578	1.06271	1.22298	0.619808
L0R599	Alternative protein CIRH1A OS=Homo sapiens GN=CIRH1A PE=4 SV=1 - [L0R599_HUMAN]	23.08	1	1	1	65	7.68968	9.42236	1.20466	0.902299	0.822595	0.976516	0.931214	1.3677	1.11173	1.13688	0.858944	0.403877
Q67AN3	MHC class II antigen (Fragment) OS=Homo sapiens GN=HLA-DPB1 PE=4 SV=1 - [Q67AN3_HUMAN]	14	1	1	1	50	6.03389	4.75439	1.25192	0.787519	1.79964	1.27969	0.639819	0.811296	0.91362	0.788245	1.62347	0.18038
A0A090N901	Similar to TSH receptor suppressor element-binding protein-1 TSEP-1 OS=Homo sapiens GN=LOC402321 PE=4 SV=1 - [A0A090N901_HUMAN]	9.68	1	1	1	186	19.7183	5.10986	1.11194	1.11504	0.878844	1.03527	1.01025	0.881931	0.982581	0.958254	1.08038	0.427952
U3KQQ1	Gamma-enolase (Fragment) OS=Homo sapiens GN=ENO2 PE=1 SV=1 - [U3KQQ1_HUMAN]	20.93	1	1	1	86	9.47483	4.84326	1.09878	1.13512	0.552004	0.928635	1.07043	0.880075	0.739128	0.896544	1.0358	0.886812
A0A0J9YX35	Immunoglobulin heavy variable 3-64D OS=Homo sapiens GN=IGHV3-64D PE=3 SV=1 - [HV64D_HUMAN]	9.4	1	1	1	117	12.8143	7.85498	0.781045	0.806192	0.508998	0.698745	0.859931	2.08884	0.678115	1.20896	0.577971	0.323185
A0A0G2JJQ0	Proteasome subunit beta type-9 (Fragment) OS=Homo sapiens GN=PSMB9 PE=1 SV=1 - [A0A0G2JJQ0_HUMAN]	7.63	1	1	1	131	13.8909	4.86865	1.0658	1.16589	1.60706	1.27959	0.799679	1.03418	1.09246	0.975438	1.31181	0.182508
A0A0F7T8I6	IGHV4-31 protein (Fragment) OS=Homo sapiens GN=IGHV4-31 PE=4 SV=1 - [A0A0F7T8I6_HUMAN]	15	1	2	2	100	10.8393	8.44092	0.52923	0.614057	0.332094	0.491794	0.95557	2.47109	0.447246	1.2913	0.380851	0.262516
A0A0J9YXL8	P protein (Fragment) OS=Homo sapiens GN=OCA2 PE=4 SV=1 - [A0A0J9YXL8_HUMAN]	1.38	1	1	1	724	81.0539	7.60596	0.931225	1.38422	0.856845	1.05743	0.881316	1.24923	0.976503	1.03568	1.021	0.917954
A0A0G2JMI3	Immunoglobulin heavy variable 1-69-2 OS=Homo sapiens GN=IGHV1-69-2 PE=3 SV=2 - [HV692_HUMAN]	5.98	1	1	1	117	12.8622	4.84326	0.523395	0.462448	0.463038	0.48296	0.885684	1.01514	0.500838	0.800554	0.603283	0.111079
A0A0S2Z5F6	Proline-serine-threonine phosphatase interacting protein 2 isoform 1 (Fragment) OS=Homo sapiens GN=PSTPIP2 PE=2 SV=1 - [A0A0S2Z5F6_HUMAN]	4.17	1	1	1	312	36.4225	8.70459	0.859936	1.14557	1.7757	1.2604	1.08516	0.778226	1.28235	1.04858	1.20201	0.529072
A0A109PP82	MS-C2 light chain variable region (Fragment) OS=Homo sapiens PE=2 SV=1 - [A0A109PP82_HUMAN]	14.02	1	1	1	107	11.7168	8.49951	0.925588	0.569103	1.1214	0.872032	0.891369	1.97251	0.70396	1.18928	0.733244	0.498873
A0A120HF56	MS-A3 light chain variable region (Fragment) OS=Homo sapiens PE=2 SV=1 - [A0A120HF56_HUMAN]	16.98	1	1	1	106	11.4148	9.20264	0.823686	0.759212	0.442565	0.675154	0.964574	2.12816	0.600294	1.23101	0.548455	0.307365
A0A1B0GTE1	Uncharacterized protein (Fragment) OS=Homo sapiens GN=LOC100289279 PE=4 SV=1 - [A0A1B0GTE1_HUMAN]	2.03	1	1	1	492	54.6149	9.15869	1.04388	0.99011	0.965089	0.999693	0.992401	0.926579	1.16125	1.02674	0.973655	0.73202
A0A193CHR8	10E8 light chain variable region (Fragment) OS=Homo sapiens PE=2 SV=1 - [A0A193CHR8_HUMAN]	8.26	1	1	1	109	11.5558	9.20264	0.57778	0.38409	0.379134	0.447001	0.692852	2.94875	0.493982	1.37853	0.32426	0.303643
A0A1L2BU38	Anti-staphylococcal enterotoxin E heavy chain variable region (Fragment) OS=Homo sapiens PE=2 SV=1 - [A0A1L2BU38_HUMAN]	7.2	1	1	1	125	13.5927	8.85107	0.586094	0.568789	0.294308	0.483064	1.53872	1.48372	0.508186	1.17688	0.410463	0.116807
A0A1W6IYI3	N90-VRC38.01 heavy chain variable region (Fragment) OS=Homo sapiens PE=2 SV=1 - [A0A1W6IYI3_HUMAN]	8.06	1	1	1	124	13.5016	7.28369	0.708085	0.741157	0.694024	0.714422	0.809234	1.88234	0.772872	1.15482	0.618646	0.293145
A0A1W6IYI5	N90-VRC38.08 heavy chain variable region (Fragment) OS=Homo sapiens PE=2 SV=1 - [A0A1W6IYI5_HUMAN]	24.19	2	2	3	124	13.5106	6.771	0.7589	0.683621	0.469266	0.637263	1.00847	1.93038	0.618311	1.18572	0.537448	0.240801
A0A1W2PS52	Cystatin-B OS=Homo sapiens GN=CSTB PE=1 SV=1 - [A0A1W2PS52_HUMAN]	14.46	2	2	2	83	9.01258	9.29053	1.17114	0.847425	0.990346	1.00297	1.19219	0.890784	0.836339	0.973105	1.03069	0.84685
