# Supplementary material for: Proteomic profiling analysis of postmenopausal osteoporosis and osteopenia identifies potential proteins associated with low bone mineral density
Source: PeerJ. 2020 Apr 14;8:e9009. doi: 10.7717/peerj.9009 (PMC7164430; doi:10.7717/peerj.9009)
Supplement: Supplemental Information 5 [file peerj-08-9009-s005.xlsx]

## Sheet: sheet1
The peptide lists of all the identified proteins in the study
Sequence	PSMs	Protein Group Accessions	Modifications	PEP	IonScore	Exp Value	Charge	MH+ [Da]	ΔM [ppm]	Missed Cleavages	NC-1/REF	NC-1/REF Count	NC-1/REF Variability [%]	NC-2/REF	NC-2/REF Count	NC-2/REF Variability [%]	NC-3/REF	NC-3/REF Count	NC-3/REF Variability [%]	ON-1/REF	ON-1/REF Count	ON-1/REF Variability [%]	ON-2/REF	ON-2/REF Count	ON-2/REF Variability [%]	ON-3/REF	ON-3/REF Count	ON-3/REF Variability [%]	OP-1/REF	OP-1/REF Count	OP-1/REF Variability [%]	OP-2/REF	OP-2/REF Count	OP-2/REF Variability [%]	OP-3/REF	OP-3/REF Count	OP-3/REF Variability [%]
sGSGLVGR	16	P10909	N-Term(TMT10)	0.0007212	45.06	0.00172942	2	961.563	0.0629285	0	0.966836	16	7.9962	0.898108	16	3.5556	0.863194	16	9.5929	0.938275	16	2.73234	0.832079	16	17.2732	1.09265	16	8.38321	1.23788	16	7.39614	1.1081	16	8.10765	1.16578	16	2.27796
aAIQALR	24	C0JYY2;Q7Z7Q0	N-Term(TMT10)	0.004856	41.84	0.0062485	2	971.621	1.01371	0
aNSAGATR	7	P06396;B7Z9A0;B7Z992	N-Term(TMT10)	0.002894	48.16	0.000941744	2	976.537	-0.0237787	0
lVGGLHR	8	O43866	N-Term(TMT10)	0.005724	45.73	0.00170939	3	980.619	-1.21307	0	1.29193	8	10.0716	1.37365	8	18.6274	1.26185	8	13.5617	1.30857	8	20.4859	1.18966	8	17.954	0.522126	8	42.7909	0.705681	8	52.272	0.540521	8	35.8193	0.576611	7	24.5924
aAANQMR	13	P0C0L4;P0C0L5;A0A0G2JPR0	N-Term(TMT10)	0.007749	30.39	0.0438317	2	990.535	0.00159904	0
lAGDESAD	14	P02775	N-Term(TMT10)	0.005631	46.12	0.000421492	2	1006.49	0.0993959	0	0.573234	14	25.5024	1.08395	14	14.2766	0.785979	14	22.7066	1.01846	14	14.695	0.935133	14	19.4157	1.17013	14	10.2442	1.01777	14	18.4206	1.00964	14	12.9676	1.44173	14	12.6161
aADESER	3	P67936;V9HW25;H7BYY1;A0A024R5W6;J3KN67;A0A0S2Z4G4;A0A0S2Z4I4;K7ENT6	N-Term(TMT10)	0.007736	31.09	0.0208903	2	1006.5	0.463706	0
qVPAHAR	17	B4E1Z4;H7C5H1	N-Term(TMT10)	0.003833	47.19	0.00198052	3	1007.59	-1.14254	0
aAFGGSGGR	4	P35908	N-Term(TMT10)	0.0001212	44.06	0.00177083	2	1008.54	-1.26718	0	1.25026	4	1.32322	0.886934	4	3.97542	1.01731	4	1.88701	0.842138	4	4.67038	0.807582	4	1.74597	1.0174	4	2.95042	1.21924	4	2.28293	1.18651	4	1.02167	1.03315	4	3.01715
aVLGAVPR	2	Q14769	N-Term(TMT10)	0.001435	34.87	0.0112414	2	1011.65	0.431633	0	1.10849	2	17.4437	0.984953	2	1.01185	0.905256	2	23.7656	0.999937	2	2.16745	0.928584	2	26.4199	0.971935	2	24.5225	1.04864	2	1.34651	1.07994	2	20.5253	0.988698	2	7.60834
lAAALGIR	1	P12259;Q15430	N-Term(TMT10)	0.002986	33.47	0.0175189	2	1013.67	2.3329	0
tVAAPSVF	14	A0N5G5;A0N5G1;Q96PF6	N-Term(TMT10)	0.006683	36.85	0.0170291	2	1020.6	5.74768	0
aLYAQAR	24	A2RTY6	N-Term(TMT10)	0.005343	31.2	0.109349	2	1021.6	3.41173	0	1.0566	24	7.03767	0.922085	24	7.79818	0.979927	24	7.32686	1.02825	24	4.81935	0.941936	24	8.27129	0.93489	24	8.49203	1.15491	24	6.31969	1.00249	24	7.88842	1.11708	24	4.4461
iHLmAGR	56	P02790	N-Term(TMT10); M4(Oxidation)	0.007162	34.58	0.0122266	3	1042.6	0.898875	0	1.07339	28	11.1149	0.938411	28	13.8032	0.908953	28	21.0107	0.926806	28	9.26285	0.905136	28	15.79	1.07279	28	12.2491	1.18942	28	12.731	0.964832	28	14.4433	1.24267	28	16.1523
gVIIQGAR	1	A0A024R412	N-Term(TMT10)	0.0007133	40.87	0.00268047	2	1042.66	1.22715	0	1.0816	1		0.739255	1		0.933761	1		1.06775	1		1.26443	1		0.905624	1		1.09655	1		0.96427	1		1.09114	1
sTLFVPR	1	J3K000	N-Term(TMT10)	0.007015	35.03	0.0503895	2	1048.64	2.81116	0	1.0822	1		1.01607	1		0.963878	1		1.04502	1		0.944364	1		0.990699	1		1.04257	1		0.922938	1		1.10587	1
sISISVAR	5	H6VRF8	N-Term(TMT10)	0.007249	27.37	0.196882	2	1061.66	3.79026	0	1.06411	5	43.4438	1.0126	5	16.2603	0.971453	5	3.44722	0.956097	5	15.7636	0.805673	5	9.90553	1.02276	5	14.4506	1.16378	5	1.1556	0.864013	5	14.3867	1.02959	5	8.34252
eNAEQSR	67	P01008	N-Term(TMT10)	0.004783	32.19	0.0172125	2	1062.54	0.128085	0	1.0384	67	8.85215	0.953649	67	5.72052	0.920307	67	10.5717	0.990097	67	6.97131	0.913436	67	8.7241	1.03129	67	6.97348	1.14139	67	10.626	1.00575	67	6.26475	1.12839	67	8.04869
aPIIAVTR	4	P14618	N-Term(TMT10)	0.006908	37.62	0.00276771	2	1069.69	-0.324091	0	0.647932	4	12.8613	1.02627	4	9.38085	0.882141	4	7.08359	1.03841	4	2.54307	0.917376	4	9.98628	1.09603	4	6.88555	1.0921	4	7.24828	1.04725	4	13.4262	1.29499	4	7.40055
iGVELTGR	17	C0JYY2	N-Term(TMT10)	0.001231	43.31	0.00358394	2	1073.65	-0.809262	0	1.09334	17	14.9242	0.882604	17	7.75269	0.910045	17	7.43969	1.06717	17	8.8649	0.925301	17	15.8959	1.14346	17	7.5031	1.01437	17	5.24449	1.01957	17	6.37638	0.946708	17	8.6021
tEQAAVAR	6	P00748;A0A0R7FJH5	N-Term(TMT10)	0.0007698	47.33	0.00105223	2	1074.61	0.670339	0
tILDDLR	22	A2RTY6	N-Term(TMT10)	0.004935	50.91	0.000483738	2	1074.63	-0.696056	0	1.10635	22	9.96796	0.897155	22	5.64015	0.84741	22	9.55603	1.06958	22	6.62344	0.895555	22	12.6507	0.931379	22	4.87082	1.10984	22	5.75465	1.02444	22	4.13967	1.13365	22	5.04106
tNTGLALR	3	P04275;L8E853	N-Term(TMT10)	0.0009386	39.26	0.00703754	2	1074.65	1.6898	0
sHDELPR	13	C0JYY2;Q59HB3	N-Term(TMT10)	0.00133	43.59	0.00159696	3	1082.58	0.398321	0
aPNVVVTR	4	P52566	N-Term(TMT10)	0.005421	28.69	0.0594912	2	1084.67	0.559793	0	0.603583	4	25.133	1.01023	4	6.59449	0.989201	4	4.38134	1.14196	4	2.91432	0.941804	4	13.6776	1.09951	4	10.8643	0.873519	4	3.96494	0.93566	4	3.82285	1.34363	4	12.9913
iVGGTASVR	4	P03951	N-Term(TMT10)	0.006086	54.82	0.00020238	2	1088.66	1.63589	0	1.0486	4	3.09201	1.00603	4	5.42215	1.01967	4	7.07944	1.00629	4	4.6516	0.935853	4	9.2473	0.993713	4	6.41016	1.05034	4	2.73212	0.964391	4	4.84041	1.12396	4	1.57813
lGSYEHR	26	A2RTY6	N-Term(TMT10)	0.006979	35.22	0.0155715	3	1090.58	-0.335898	0	1.14285	26	8.43396	0.912648	26	11.0086	0.924279	26	10.192	1.09993	26	8.50916	0.97484	26	10.9657	0.925322	26	8.63833	1.08428	26	10.5689	0.902117	26	19.6592	1.19936	26	15.0424
gIYGTISR	10	P01031	N-Term(TMT10)	0.001405	31.16	0.0442515	2	1095.64	-0.529122	0	1.23547	10	11.4342	0.959971	10	6.71077	1.13161	10	4.24352	1.03712	10	3.62367	0.904499	10	9.83052	0.919438	10	10.8569	1.11828	10	6.87266	0.879073	10	5.66676	0.980132	10	2.5894
eLVLAGNR	3	B0AZL7	N-Term(TMT10)	0.005413	38	0.0114509	2	1100.66	0.952623	0	1.15629	3	1.74254	0.984183	3	2.21569	0.969609	3	1.08527	1.01822	3	7.13054	0.87515	3	1.2339	0.956037	3	0.292052	1.01055	3	3.93654	1.08604	3	1.11197	1.00824	3	0.166108
vFAVSHGR	12	A0A024R462	N-Term(TMT10)	0.006334	43.83	0.00275103	3	1101.64	1.03275	0	1.18894	12	12.4933	0.872993	12	17.7907	1.04045	12	19.6754	0.920316	12	9.32071	1.11864	12	8.32998	0.97616	12	20.3833	1.2542	12	27.1204	0.992498	12	16.7205	0.848103	12	13.2183
gTLLALER	5	P07996;A0A024R9Q1	N-Term(TMT10)	0.002828	30.79	0.0537308	2	1101.68	-0.390842	0
aELQEGAR	11	P02647	N-Term(TMT10)	0.0006521	48.88	0.000594683	2	1102.61	-0.0535292	0	0.56365	11	21.9985	0.629917	11	15.8831	0.494383	11	22.2429	1.22555	11	7.1722	4.2924	11	20.8238	0.509889	11	28.0768	0.532386	11	16.1839	0.391903	11	36.3045	0.437873	11	43.9057
aTVEETAR	1	K7EJ25	N-Term(TMT10)	0.003765	24.76	0.379646	2	1105.61	4.11849	0	0.910081	1		1.02841	1		0.879989	1		1.01401	1		0.980093	1		1.09346	1		1.04144	1		1.0347	1		1.09019	1
vSPLTFGR	1	A8K2W3	N-Term(TMT10)	0.004673	22.15	0.675672	2	1105.66	0.0294666	0	0.428148	1		0.935073	1		0.78035	1		1.10405	1		0.985364	1		1.15619	1		0.91019	1		1.2417	1		1.4601	1
gVASLFAGR	1	A0A0C4DFP6	N-Term(TMT10)	4.513e-05	43.99	0.00368499	2	1106.65	-0.320221	0	1.08559	1		0.847349	1		0.881322	1		0.965245	1		1.20717	1		1.13477	1		0.890467	1		1.18981	1		0.804458	1
aVLHVALR	2	K7EQ48	N-Term(TMT10)	0.002463	30.12	0.0142507	2	1107.72	-0.00451208	0	0.793201	2	6.4594	1.07729	2	12.9279	0.939319	2	8.81117	1.1304	2	5.64043	1.16636	2	51.2061	1.0466	2	15.9095	1.02426	2	18.4641	0.902395	2	6.64411	0.855104	2	9.12336
vTIScSGR	5	Q6IN99	N-Term(TMT10); C5(Carbamidomethyl)	0.001748	20.85	0.413177	2	1108.6	0.0603468	0	0.826671	5	20.0416	1.11212	5	2.264	1.59536	5	6.61939	0.883653	5	25.1762	1.75548	5	9.14296	0.727585	5	7.66335	0.758819	5	17.0302	0.595286	5	9.69207	0.861484	5	14.7212
aTHGGLGLR	4	E7EX60	N-Term(TMT10)	0.0001904	40.11	0.00643006	3	1110.66	-0.00682063	0	1.15856	2	3.6725	1.03718	2	1.32897	0.990517	2	3.57534	0.995619	2	8.81188	1.01529	2	5.84399	0.943577	2	7.36171	1.07824	2	2.41157	0.866301	2	1.35898	1.06874	2	4.34534
vVGGLVALR	3	P00748;A0A0R7FJH5	N-Term(TMT10)	0.007279	36.64	0.00458469	2	1112.73	-1.49463	0
yGAATFTR	17	P01023;B2R950	N-Term(TMT10)	0.001491	34.86	0.0114632	2	1115.6	0.0722719	0
sVNNVVVR	9	O75882;B4DZ36	N-Term(TMT10)	0.005467	42.66	0.00402165	2	1115.67	0.260249	0
scHTAVGR	12	Q53H26;B4E1B2	N-Term(TMT10); C2(Carbamidomethyl)	0.004187	29.15	0.0293101	2	1116.58	1.08904	0
aGAEPASER	37	B4DPP8	N-Term(TMT10)	0.005667	48.02	0.000425955	2	1116.58	-1.16577	0	1.01752	37	11.0768	1.05701	37	10.4701	1.04016	37	10.8568	0.61718	37	20.9491	1.29693	37	9.21368	1.01588	37	8.05398	1.08743	37	7.5888	1.07709	37	10.561	1.1321	37	10.08
tGAQELLR	9	P06396;B7Z9A0;B7Z992	N-Term(TMT10)	0.007211	35.23	0.101312	2	1116.66	-0.733878	0
lTVSIEAR	12	P22792	N-Term(TMT10)	0.001019	35.22	0.0223652	2	1117.68	0.564649	0	1.09342	12	4.76021	1.08635	12	3.67051	1.04376	12	5.8131	0.899839	12	7.18813	0.909193	12	6.24461	1.05629	12	4.19867	1.00225	12	7.25796	1.01437	12	5.70602	0.938764	12	6.57714
gFVVAGPSR	5	P13671	N-Term(TMT10)	0.003137	42.65	0.00377016	2	1118.65	0.992685	0	1.2335	5	4.26379	0.889347	5	5.16004	0.955802	5	2.25988	0.961712	5	1.70446	0.839141	5	1.78864	0.902737	5	6.33288	1.13389	5	2.20279	1.01191	5	2.58269	1.16253	5	10.3641
qGASGIk	19	P07225;Q16519	N-Term(TMT10); K7(TMT10)	0.006161	37.36	0.0317997	2	1118.69	0.53815	0
vTGVVLFR	2	P08294	N-Term(TMT10)	0.002082	29.94	0.0963216	2	1119.71	0.649235	0	1.12807	2	2.81808	0.911077	2	0.398053	0.948701	2	0.68896	0.999112	2	11.3191	0.992745	2	0.0506222	0.749521	2	0.180796	0.92285	2	7.64148	1.58386	2	0.995687	0.681485	2	11.6197
vQSTITSR	38	A2RTY6	N-Term(TMT10)	0.003247	39.67	0.0111725	2	1120.65	0.878605	0	1.08062	38	8.69354	0.929335	38	9.98768	0.913924	38	13.954	1.04139	38	8.03582	0.912922	38	13.2019	0.928218	38	6.73606	1.14488	38	7.32534	1.02825	38	8.82558	1.09811	38	10.4785
cTDAVGDR	7	A0A024R035	N-Term(TMT10); C1(Carbamidomethyl)	0.001194	40.76	0.0014061	2	1122.54	0.586478	0	1.07191	7	5.40468	1.01466	7	3.45826	0.988156	7	8.00037	0.910544	7	4.05026	0.980471	7	7.63361	0.959407	7	4.20221	1.14	7	5.7233	0.953378	7	4.09952	1.11607	7	7.62133
tGIVSGFGR	4	P00742	N-Term(TMT10)	6.577e-05	42.4	0.00403959	2	1122.65	0.956237	0	1.04509	4	3.83323	0.943423	4	2.35568	1.05	4	5.02548	0.975848	4	0.892948	0.816366	4	2.61594	1.06613	4	3.46297	0.972864	4	8.87069	1.04536	4	6.03756	1.15308	4	11.9237
aLAGNPk	13	Q5T123	N-Term(TMT10); K7(TMT10)	0.004339	38.57	0.00751964	2	1128.71	0.652112	0	0.364025	13	26.7632	0.951555	13	7.14865	0.870609	13	9.6312	1.29549	13	4.84356	1.02984	13	16.2217	1.23978	13	13.7937	0.901663	13	8.36832	0.871975	13	4.93055	1.29853	13	12.6668
vSVFVPPR	11	P01871;Q86TT1;P0DOX6	N-Term(TMT10)	0.005109	34.8	0.0148181	3	1129.69	1.13998	0
qScPAGER	1	Q9Y6R7	N-Term(TMT10); C3(Carbamidomethyl)	0.007506	23.48	0.074043	2	1133.56	0.590668	0	1.25546	1		1.00725	1		0.827833	1		0.712185	1		1.00418	1		1.08591	1		1.19285	1		1.08231	1		1.05591	1
cGSEAQPR	1	P26927	N-Term(TMT10); C1(Carbamidomethyl)	0.007721	32.96	0.00842198	2	1133.56	1.12911	0	1.23208	1		1.00097	1		0.9131	1		0.912735	1		0.640736	1		0.995909	1		1.293	1		1.07289	1		1.11846	1
tSALSAk	52	P02774;D6RF20	N-Term(TMT10); K7(TMT10)	0.002204	37.55	0.0120066	2	1135.71	0.807447	0
dGFFGNPR	23	P01871;Q86TT1;P0DOX6	N-Term(TMT10)	0.001365	47.37	0.00066513	2	1138.58	0.280195	0
tLYSSSPR	41	P05155	N-Term(TMT10)	0.0006512	46.05	0.00166618	2	1139.63	1.46162	0	1.13349	41	11.627	1.10565	41	7.95979	1.08165	41	10.5892	0.923967	41	7.24041	1.07383	41	13.0776	0.90884	41	14.1261	1.01465	41	11.1216	0.864713	41	12.7361	0.970301	41	14.1753
lPGIVAEGR	24	P01008	N-Term(TMT10)	0.003648	40.61	0.00404936	3	1140.69	0.212721	0	1.1182	24	6.11972	0.89592	24	9.31839	1.02495	24	7.42914	1.01892	24	4.43001	0.996954	24	11.1372	1.00981	24	6.98272	1.11131	24	9.10043	0.973889	24	6.59211	0.944144	24	13.278
iVVVTAGVR	2	P07195	N-Term(TMT10)	0.002076	25.68	0.101534	2	1142.74	-0.868658	0	0.853001	2	23.2371	1.01985	2	4.27246	1.04396	2	7.36989	1.07151	2	1.89995	1.01632	2	10.6737	0.978454	2	17.0533	0.911375	2	2.75781	1.17623	2	0.533872	0.903708	2	15.3198
aVDAALk	52	B4E1C2;B4DPP8	N-Term(TMT10); K7(TMT10)	0.007506	39.66	0.0220288	2	1145.73	0.269371	0
lGATAEk	8	A0A024QZN4;B4E3Q9	N-Term(TMT10); K7(TMT10)	0.00614	29.57	0.130778	2	1147.71	0.364852	0
sAVQGPPDR	31	Q6ZW64	N-Term(TMT10)	0.0006939	44.59	0.00124939	2	1155.63	0.424519	0	0.822246	31	6.47391	0.847341	31	6.18124	2.00486	31	12.6577	0.563673	31	18.0885	3.91772	31	22.4564	0.316371	27	63.5072	0.475789	31	35.4842	0.300496	26	75.6759	0.365666	21	52.5355
iDVHWTR	13	P25311	N-Term(TMT10)	0.005017	45.28	0.00122744	3	1155.65	-1.89471	0	1.16064	13	9.21569	1.06166	13	6.17655	1.07352	13	8.72446	0.938684	13	5.88149	0.967053	13	11.8456	0.948259	13	9.98333	1.11935	13	8.13846	0.483413	13	15.8657	1.47933	13	9.98643
iLDDLSPR	44	B2RMS9;B7ZKJ8;B7Z8Q7;B7Z544	N-Term(TMT10)	0.004709	45.33	0.00160906	3	1157.67	-0.587839	0
lGNHPVHR	2	Q9NZP8;Q9H804	N-Term(TMT10)	0.003052	38.62	0.0147778	3	1158.67	-1.94655	0
vQVVAGk	35	B4E1C2;B4DPP8	N-Term(TMT10); K7(TMT10)	0.007122	34.2	0.0279249	2	1158.76	0.359788	0
yDSTcER	4	P07357	N-Term(TMT10); C5(Carbamidomethyl)	0.004224	31.17	0.00259704	2	1159.53	1.53146	0	1.04954	4	2.76306	0.985576	4	6.71241	0.866412	4	8.68229	0.910929	4	3.5965	0.874711	4	8.89475	0.895838	4	1.62814	1.13882	4	6.74464	1.13523	4	8.37007	1.19906	4	3.99013
vVATNTLGR	2	Q12860	N-Term(TMT10)	0.001342	30.5	0.0552576	2	1159.7	1.53515	0	1.08744	2	2.2095	0.970936	2	2.904	1.07052	2	8.77509	0.917225	2	7.92028	0.899843	2	10.291	0.975658	2	1.1868	1.28306	2	2.14163	1.05696	2	4.16214	0.918345	2	2.27545
aGQLSVk	12	P07360	N-Term(TMT10); K7(TMT10)	0.004291	40.34	0.00764263	2	1160.74	0.979871	0	1.1238	12	5.54111	1.01358	12	6.8751	1.02469	12	7.86001	0.912785	12	5.0925	0.869911	12	13.8425	0.876411	12	9.9173	1.05074	12	4.3868	1.19448	12	9.90898	1.04162	12	14.9
aDSSPVk	42	Q8NEJ1;S6BAR0;Q6GMX4;Q6GMV8;S6BGD6;Q6IN99;Q5FWF9;S6C4R7	N-Term(TMT10); K7(TMT10)	0.005137	42.36	0.00651908	2	1161.69	2.87209	0
lcTVATLR	13	P02768;F6KPG5	N-Term(TMT10); C2(Carbamidomethyl)	0.0005626	43.45	0.00478967	2	1162.68	-1.17308	0
sQQSEVTR	2	Q5T123	N-Term(TMT10)	0.0001333	42.01	0.00407291	2	1163.62	1.41574	0	0.554032	2	30.7708	1.05019	2	9.75627	0.984791	2	8.25386	1.27563	2	19.9216	1.04959	2	3.09726	1.14875	2	3.24063	0.863359	2	12.2798	0.83106	2	16.7217	1.17602	2	22.753
iScTIANR	9	A0A024R462	N-Term(TMT10); C3(Carbamidomethyl)	0.00325	38.72	0.00834528	2	1163.64	0.61323	0	1.11069	9	9.64665	0.827465	9	12.9382	0.97831	9	7.47648	0.856237	9	4.29516	1.13008	9	16.6232	1.08251	9	8.29456	1.28886	9	7.95105	0.974722	9	9.81331	0.881168	9	15.5749
yLATLTVR	2	A0A0A0N0L2	N-Term(TMT10)	0.003776	24.97	0.227829	2	1165.72	0.966214	0	1.04667	2	8.95681	1.10307	2	0.211654	1.10022	2	11.6286	0.939508	2	2.6758	1.04397	2	24.7375	0.939122	2	5.42542	1.00197	2	3.40334	0.985331	2	6.42365	0.936018	2	33.1617
tVTIScTR	5	Q5NV88	N-Term(TMT10); C6(Carbamidomethyl)	0.00648	29.84	0.072212	2	1166.64	0.170651	0	0.810318	5	11.2283	0.654523	5	5.47748	1.8045	5	12.3165	0.771871	5	10.9425	3.80674	5	14.8281	0.411028	5	76.071	0.433806	5	22.5168	0.37725	5	48.0391	0.372101	5	54.3521
yTVNQcR	20	P00450	N-Term(TMT10); C6(Carbamidomethyl)	0.00548	33.79	0.0126394	2	1169.59	0.795703	0	0.961711	20	13.5249	1.03907	20	8.52518	0.957891	20	10.1986	0.928532	20	7.53271	1.15663	20	13.7302	0.951249	20	8.43339	1.00395	20	7.57727	1.00757	20	14.2974	1.09881	20	7.15552
hIAEEADR	5	P67936;J3KN67;A0A0S2Z4G4;K7ENT6;A0A0S2Z4I4	N-Term(TMT10)	0.0008462	41.13	0.00284078	2	1169.61	-0.634458	0
dDNPNLPR	15	P02768;F6KPG5	N-Term(TMT10)	0.0004046	54.26	0.000138178	2	1169.61	-0.634458	0
sAVQGPPER	32	Q96K68;Q8NCL6;Q6MZW0;Q6ZVX0;Q7Z379;Q9NPP6;Q6P089;Q6N041	N-Term(TMT10)	0.0005247	46.14	0.00100085	2	1169.65	0.919882	0
mGVAAHk	4	P05109	N-Term(TMT10); K7(TMT10)	0.007138	32.16	0.0408971	2	1171.7	1.75465	0	0.609179	4	13.4415	1.10771	4	11.122	1.3726	4	6.72069	0.974689	4	7.25659	1.11826	4	7.48132	1.06126	4	2.3734	0.821652	4	3.13732	0.868877	4	1.73565	1.10131	4	10.0385
sFLDSGYR	5	A0A024QZN4;B4E3Q9	N-Term(TMT10)	0.0006568	40.03	0.00263176	2	1173.61	-0.336134	0
aLDGLWNR	1	O95479	N-Term(TMT10)	0.002923	29.23	0.0755197	2	1173.66	-0.155861	0	1.10688	1		0.935234	1		1.02042	1		0.914702	1		1.03639	1		1.02237	1		1.17069	1		1.05892	1		0.887346	1
aVELGVk	6	P33908	N-Term(TMT10); K7(TMT10)	0.002861	36.73	0.0285152	2	1173.76	0.32434	0	1.14193	3	0.305447	0.923498	3	5.22618	0.954572	3	1.64956	0.981041	3	1.93449	0.896576	3	3.52097	0.992748	3	2.69239	1.10093	3	2.24851	1.14751	3	0.430345	0.990929	3	2.99959
fLNVLSPR	3	A6XND1	N-Term(TMT10)	0.0005083	42.87	0.00463484	2	1174.71	0.245207	0	1.13743	3	1.41482	1.02263	3	0.69644	0.988852	3	6.87087	0.975082	3	0.397806	0.920595	3	8.3316	0.927417	3	3.90778	0.917962	3	9.29181	1.14467	3	0.917804	0.952852	3	2.10577
eDALNETR	2	P10909	N-Term(TMT10)	0.006122	33.02	0.0154155	2	1176.61	0.759601	0	1.03943	2	14.5524	1.00435	2	1.43788	0.857822	2	1.59555	0.827574	2	3.59035	0.856956	2	2.67659	1.12075	2	6.86639	1.15859	2	7.03822	1.17135	2	1.50587	1.10189	2	9.00094
sQAIATk	30	C0JYY2	N-Term(TMT10); K7(TMT10)	0.003789	43.04	0.00407454	2	1176.74	1.55757	0	1.16613	30	5.73513	0.886708	30	3.88613	0.920568	30	4.87348	1.0519	30	3.75278	0.892458	30	5.94739	1.0514	30	6.43825	1.0203	30	6.18345	1.04566	30	6.61489	1.00222	30	7.58257
eATEAAk	106	P02765	N-Term(TMT10); K7(TMT10)	0.004173	37.58	0.0187327	2	1177.68	-0.938289	0	1.15083	106	7.61962	1.03655	106	6.87575	0.910214	106	6.79488	0.928815	106	4.35273	0.91362	106	10.1774	1.0108	106	5.33413	1.17647	106	7.57231	0.914341	106	5.6729	1.11801	106	5.18087
lAVYQAGAR	3	P02649	N-Term(TMT10)	0.0002649	41.23	0.00804207	2	1177.69	0.743579	0	1.2884	3	2.01948	0.631944	3	9.0244	0.920245	3	15.5271	1.11571	3	1.25878	0.882962	3	1.37023	0.925746	3	14.8685	1.20165	3	13.7509	0.957536	3	5.51915	1.34671	3	4.68907
vNLGVGAYR	1	P17174	N-Term(TMT10)	0.005578	17.35	1.96779	2	1177.69	1.7801	0	1.00511	1		1.05476	1		0.993129	1		0.950249	1		1.31929	1		0.950409	1		0.977899	1		0.907748	1		0.982122	1
eFHLHLR	24	P0C0L4;P0C0L5;A0A0G2JPR0	N-Term(TMT10)	0.0006771	42.08	0.00494004	3	1180.68	-0.62554	0
gGVASGFk	10	P06396;B7Z9A0;B7Z992	N-Term(TMT10); K8(TMT10)	8.577e-05	45.62	0.00634949	2	1180.71	1.30734	0
acVMMQGR	2	P00491	N-Term(TMT10); C2(Carbamidomethyl)	0.002306	15.99	0.4985	2	1181.58	1.24977	0	0.802805	2	23.7502	1.02826	2	12.0095	0.927947	2	15.2264	1.02325	2	7.6092	0.826037	2	6.96411	1.15981	2	2.86076	1.10672	2	7.40707	0.992741	2	12.3611	1.21086	2	14.6836
aGGFLMk	2	P00558	N-Term(TMT10); K7(TMT10)	0.006906	28.59	1.43178	2	1181.71	-0.213182	0	0.566309	2	14.2555	1.02778	2	10.2412	0.948583	2	12.6645	1.13602	2	1.4788	0.938479	2	16.3552	1.13878	2	5.06772	0.811241	2	3.96556	1.07265	2	5.99364	1.35072	2	10.4095
hLNLGMNR	2	Q15404	N-Term(TMT10)	0.004222	22.67	0.281463	3	1183.66	0.721176	0	0.809945	2	11.7578	0.987489	2	13.7309	1.0565	2	2.51893	1.03674	2	12.9827	0.846616	2	5.19257	1.11467	2	0.0993562	0.998267	2	26.8181	1.04074	2	8.46162	1.17953	2	4.33187
vYFAGFPR	3	P07225;Q16519	N-Term(TMT10)	0.0002753	46.75	0.000906687	2	1185.66	0.581856	0
aLVILAk	2	Q99497	N-Term(TMT10); K7(TMT10)	0.00765	42.09	0.000349179	2	1185.83	-1.03076	0	0.559767	2	22.7968	0.978969	2	1.1512	0.857394	2	11.9963	1.0921	2	0.0697353	0.864178	2	1.23531	1.16381	2	6.26581	1.00077	2	9.40766	1.13464	2	3.58645	1.37529	2	11.3441
hGHGHGk	6	B4E1C2	N-Term(TMT10); K7(TMT10)	0.001697	37.49	0.0113983	3	1187.68	-0.387191	0	1.19984	6	5.34797	1.04541	6	4.4439	1.02239	6	11.0053	0.813167	6	10.2003	1.01225	6	4.48856	0.938918	6	6.33417	1.01577	6	11.8392	1.02512	6	7.31528	1.07918	6	5.9889
nAGAVIGk	1	S4R457	N-Term(TMT10); K8(TMT10)	0.0004918	39.52	0.0068352	2	1187.75	-0.725313	0	0.630311	1		0.984471	1		1.00143	1		0.93298	1		0.908993	1		1.19717	1		0.981901	1		1.03403	1		1.51217	1
lGHLLHIR	2	P80108	N-Term(TMT10)	0.006218	37.23	0.0145048	2	1187.75	-2.33805	0	1.22133	2	12.2223	0.831567	2	23.09	1.05212	2	11.5206	1.14171	2	5.45719	0.867111	2	15.116	0.877781	2	2.22039	1.09398	2	6.37979	1.03501	2	21.7283	0.905413	2	17.4529
dEIQAVER	1	Q59FI0	N-Term(TMT10)	0.00662	37.87	0.00935739	2	1188.64	1.04902	0	0.646128	1		1.07768	1		0.998828	1		0.99232	1		1.17673	1		0.999306	1		0.971513	1		0.938658	1		1.36284	1
aNLSSQALR	5	B7Z539	N-Term(TMT10)	0.0004304	53.91	0.000253011	2	1188.69	0.225269	0	1.01953	5	14.4537	1.24325	5	4.5016	1.3719	5	4.82227	0.755974	5	7.59734	0.940746	5	48.302	0.756191	5	10.509	1.02518	5	7.33627	1.05702	5	4.51786	1.24911	5	2.52593
gEDAAQAEk	2	A8K2W3	N-Term(Acetyl); K9(TMT10)	0.001714	43.92	0.000620428	2	1189.59	-0.0832401	0	0.417854	2	115.812	0.877813	2	7.15698	0.67688	2	28.4435	1.11964	2	24.465	0.845129	2	24.3718	1.3773	2	11.4242	1.01126	2	0.0610453	1.08224	2	5.41096	1.46777	2	15.5693
aDLSGITGAR	46	P01011	N-Term(TMT10)	0.0001294	57.61	0.000113131	3	1189.67	0.888556	0	1.02851	46	5.23142	0.936455	46	8.27004	1.12998	46	8.81402	0.996552	46	5.04928	0.940346	46	8.46891	0.947839	46	7.36427	1.11068	46	9.25722	0.951048	46	7.41646	1.07582	46	7.93506
fQNALLVR	6	P02768;F6KPG5	N-Term(TMT10)	0.0007505	37.24	0.0495881	2	1189.73	-0.300948	0
dIVSGLk	6	P52566	N-Term(TMT10); K7(TMT10)	0.005151	36.95	0.0547179	2	1189.75	-1.2501	0	0.710387	6	9.93528	1.05638	6	4.7393	0.949529	6	0.578571	1.09464	6	3.9235	0.881047	6	6.41895	1.15486	6	3.11593	0.926813	6	2.7577	1.02522	6	1.01332	1.24459	6	2.69778
tDDEVVQR	2	Q5CAQ5	N-Term(TMT10)	0.002233	37.6	0.00668184	2	1190.62	1.03724	0	0.885904	2	4.12891	0.918192	2	7.03822	0.886526	2	4.69928	1.02009	2	0.436131	0.981201	2	6.84508	1.1186	2	5.44797	0.884714	2	4.72522	1.05874	2	6.85535	1.3226	2	5.3362
rPQGSTcR	3	B4E1Z4;A0A1U9X8W4	N-Term(TMT10); C7(Carbamidomethyl)	0.001872	34.97	0.0127209	3	1190.63	-0.182343	0
lDVTTSIGR	15	C0JYY2;Q59HB3	N-Term(TMT10)	0.002624	34.87	0.0413161	2	1190.69	0.408541	0
tQVADAk	76	A2RTY6	N-Term(TMT10); K7(TMT10)	0.004427	42.76	0.00694918	2	1190.72	0.598178	0	1.08494	76	8.38085	0.92019	76	6.83709	0.922815	76	8.73731	1.04342	76	5.22664	0.892967	76	10.2244	0.94052	76	6.97572	1.14039	76	8.98601	1.00478	76	8.09006	1.13487	76	8.81154
tTNPTAk	7	Q9Y490	N-Term(TMT10); K7(TMT10)	0.007103	28.31	0.190883	2	1190.72	0.811613	0	0.390912	7	7.44303	1.06398	7	1.33919	1.01953	7	4.67299	1.09752	7	3.71534	0.747455	7	2.3004	1.24758	7	3.46745	0.806763	7	5.24958	1.03458	7	2.42683	1.64434	7	4.28571
rLEFVAAR	2	B3KSS4	N-Term(TMT10)	0.0002364	47.8	0.00225372	3	1190.72	-0.0218545	1	0.931983	2	21.1301	0.957274	2	11.3592	1.01275	2	13.4917	0.892595	2	1.29783	1.03775	2	8.43806	1.13461	2	16.0169	1.01225	2	6.99931	1.13566	2	11.6496	0.962359	2	13.9442
eSIESEIR	2	P55072	N-Term(TMT10)	0.002188	30.32	0.0658173	2	1191.64	1.53658	0	0.388815	2	35.2964	1.07257	2	13.6924	0.928751	2	12.0823	1.09212	2	3.56197	0.823127	2	15.0129	1.37538	2	8.00822	0.873894	2	2.40382	1.05463	2	3.64401	1.3814	2	2.32405
gVALADFNR	5	A0A0C4DFP6	N-Term(TMT10)	0.0002217	42.53	0.00458783	2	1191.66	-3.5943	0	1.01215	5	0.753997	0.847614	5	2.04847	0.984163	5	6.57537	1.02566	5	2.63731	1.11639	5	4.67968	1.06217	5	8.01465	0.914758	5	3.67989	1.10556	5	2.56976	0.917896	5	6.46982
vEASISk	34	P0C0L4;P0C0L5;Q6U2L6;A0A0G2JPR0;Q9UNU2	N-Term(TMT10); K7(TMT10)	0.005594	37.14	0.0168468	2	1191.74	0.688133	0
lSMDGSPTR	3	P03952	N-Term(TMT10)	0.003872	25.07	0.339799	2	1192.62	0.339819	0	1.24587	3	3.46821	1.10314	3	0.538286	0.928881	3	12.8918	1.07203	3	6.76353	1.08642	3	12.2629	0.919767	3	0.132883	0.851428	3	6.80305	0.986854	3	11.5802	0.852582	3	8.35782
gNFHAVYR	6	P05109	N-Term(TMT10)	0.001696	25.13	0.180919	2	1192.64	2.06412	0	0.843368	6	5.52547	1.08044	6	5.48922	1.31121	6	1.52593	0.922916	6	3.57514	1.10578	6	8.67994	1.01739	6	5.74021	0.926621	6	4.64214	0.929228	6	2.05429	1.10001	6	2.75541
fDPSLTQR	7	P08697	N-Term(TMT10)	0.005581	26.67	0.147788	2	1192.65	0.510123	0	1.11487	7	4.20193	0.911401	7	3.67435	0.975481	7	6.17961	1.0105	7	4.41237	0.873826	7	4.08671	1.03415	7	6.66987	1.09973	7	3.80229	1.00925	7	5.58737	1.09183	7	3.89794
gQIVFMNR	9	P0C0L4;P0C0L5;A0A0G2JPR0	N-Term(TMT10)	0.001583	34.87	0.0214238	2	1193.67	0.531485	0
aQIHGGILR	1	A0A024RAB6	N-Term(TMT10)	0.0003896	39.01	0.00863521	3	1193.73	-0.938135	0	1.163	1		0.948941	1		1.05788	1		0.913306	1		1.1173	1		0.960481	1		1.22057	1		0.881958	1		0.967241	1
vTIScSGSR	4	Q8NEJ1	N-Term(TMT10); C5(Carbamidomethyl)	0.00241	37.95	0.00720659	2	1195.63	2.97697	0	1.47001	4	3.1136	1.17499	4	10.5698	2.02342	4	6.22934	0.944853	4	0.491868	2.40513	4	10.3341	0.320717	4	59.81	0.474266	4	15.6589	0.258927	4	31.4563	0.317693	3	26.1109
gDFSSANNR	18	P02671	N-Term(TMT10)	4.961e-05	39.99	0.0019144	2	1196.59	0.279018	0	1.20435	18	7.82255	0.983947	18	8.56564	1.28085	18	8.63787	0.943135	18	4.84462	1.26128	18	10.1252	0.763999	18	10.3816	1.14033	18	9.45149	0.80944	18	13.1788	0.857191	18	11.3783
tFGQGTk	9	A2KBC6;A2IPI6;A0A0X9UWL5	N-Term(TMT10); K7(TMT10)	0.007298	32.96	0.0262776	2	1196.7	-0.262738	0
lScAASGFR	1	Q8NCL6	N-Term(TMT10); C3(Carbamidomethyl)	5.705e-05	37.59	0.0068453	2	1197.63	5.19504	0	1.41904	1		0.98533	1		1.94201	1		0.702056	1		3.08912	1		0.279749	1		0.521919	1		0.302971	1		0.231287	1
lGPLVEQGR	10	P02649	N-Term(TMT10)	0.0002038	39.61	0.0062082	2	1197.71	-1.09078	0	1.01957	10	7.07007	0.713005	10	13.989	0.889875	10	10.1294	1.01007	10	3.36902	0.937469	10	7.72409	1.1048	10	1.93181	1.06889	10	8.76533	1.10225	10	8.03708	1.25673	10	9.30657
lIQGAPTIR	2	P18065	N-Term(TMT10)	0.001957	34.34	0.0133999	2	1197.75	0.741201	0	1.16878	2	2.79738	1.06904	2	2.83548	1.03815	2	3.12737	1.00478	2	2.92374	1.05424	2	4.93873	1.01876	2	0.34746	1.17373	2	5.84897	0.710199	2	7.86042	0.94718	2	6.71267
lSNAAHk	23	P05543	N-Term(TMT10); K7(TMT10)	0.004817	35.85	0.0108297	3	1198.73	-0.5231	0	1.01096	23	18.3307	0.961728	23	16.0177	0.864444	23	8.79003	0.905235	23	11.3356	1.0678	23	24.3236	1.0662	23	11.8031	1.14156	23	12.6678	0.873366	23	19.9227	1.15287	23	13.0328
fFSAQTNR	2	B2R815	N-Term(TMT10)	0.007301	31.19	0.0247106	2	1199.64	2.49154	0	1.26002	2	5.36917	1.09095	2	1.89734	0.917112	2	1.29188	0.924918	2	4.05979	0.799564	2	1.77259	0.894417	2	0.165323	1.19223	2	5.25279	0.956692	2	2.74536	1.1509	2	1.9163
gLALGIAk	1	P48637	N-Term(TMT10); K8(TMT10)	0.0004643	44.32	0.00163834	2	1200.81	-0.0285664	0	0.918114	1		1.02419	1		0.904534	1		1.06632	1		0.901038	1		1.0909	1		1.0142	1		1.00241	1		1.13994	1
eETTSHLR	9	B4DPP8	N-Term(TMT10)	0.002005	26.69	0.11893	2	1201.64	0.740625	0	1.1376	9	4.30991	1.14567	9	7.31409	1.05608	9	8.87426	0.415854	9	28.2247	1.14898	9	4.80152	1.06928	9	13.3666	1.24545	9	7.32282	0.969145	9	15.7244	1.19622	9	6.85457
qLVcPVTR	6	P22792	N-Term(TMT10); C4(Carbamidomethyl)	0.007352	41.65	0.00445226	2	1201.69	1.67955	0	1.12342	6	4.4963	0.974056	6	4.03424	0.953491	6	10.4214	0.924395	6	7.72206	0.894002	6	8.96481	0.960315	6	5.86371	1.15733	6	15.5716	0.938599	6	4.46425	1.1447	6	10.0304
eQLSLLDR	71	P01011	N-Term(TMT10)	0.0006663	54.48	0.000239	2	1202.69	-0.306017	0	1.02889	71	9.02144	0.933793	71	7.75087	1.1272	71	8.80309	0.986882	71	5.76354	0.973377	71	10.0066	0.960005	71	4.99497	1.13021	71	7.20305	0.934509	71	7.21272	1.10634	71	6.77011
lATALQk	3	P67936;V9HW25;H7BYY1;A0A024R5W6;A0A0S2Z4G4;J3KN67;A0A0S2Z4I4;K7ENT6	N-Term(TMT10); K7(TMT10)	0.005442	36.99	0.0125491	2	1202.79	0.680283	0
nQADNcPR	1	G3XAP6	N-Term(TMT10); C6(Carbamidomethyl)	0.0005859	34.8	0.00337754	2	1203.57	0.567634	0	0.912762	1		1.00465	1		0.741189	1		1.22097	1		0.721227	1		1.06446	1		0.991751	1		1.15116	1		1.10691	1
sQPMGLWR	3	P25311	N-Term(TMT10)	0.004713	24.22	0.215712	2	1203.65	-0.263487	0	1.16341	3	2.4747	0.96829	3	5.21086	0.95821	3	1.15252	1.00112	3	1.75717	0.909488	3	1.08283	0.959247	3	6.07271	1.03117	3	3.69536	0.999977	3	6.3043	1.13654	3	1.21879
aAEEAEEAR	1	Q15149	N-Term(TMT10)	0.00462	24.06	0.101891	2	1204.6	3.32941	0	0.751967	1		1.21081	1		0.960459	1		0.835355	1		1.06837	1		1.32436	1		0.761573	1		0.765582	1		1.52734	1
vVEEQESR	126	P0C0L4;P0C0L5;A0A0G2JPR0	N-Term(TMT10)	0.000907	48.53	0.000808021	2	1204.64	0.801753	0
iSASAEELR	32	P06727	N-Term(TMT10)	0.0009894	44.45	0.00238324	2	1204.67	-0.222407	0	1.12344	32	10.3043	0.979911	32	7.55062	1.02511	32	8.70743	0.865088	32	12.0036	0.964606	32	12.7196	1.01718	32	4.23707	1.14204	32	8.10261	1.03793	32	8.76234	1.02197	32	6.81079
aLTQVSk	4	A0A024RDA6	N-Term(TMT10); K7(TMT10)	0.001892	40.72	0.00529941	2	1204.77	0.973212	0	1.32868	2	4.17568	0.989558	2	1.3585	1.11938	2	1.7929	0.950985	2	9.15865	0.949277	2	22.8523	0.881103	2	11.1025	1.17784	2	15.7173	0.784276	2	4.71142	1.04542	2	10.8875
vLDLScNR	6	B2R888	N-Term(TMT10); C6(Carbamidomethyl)	0.004259	23.49	0.216022	2	1205.65	0.532183	0	0.995443	6	7.02422	0.900186	6	2.20916	0.990721	6	15.5925	0.970103	6	6.10485	1.03986	6	12.4209	0.979478	6	1.94246	1.17737	6	4.05721	0.988232	6	2.93778	1.14365	6	6.34684
fQASVATPR	4	P11226	N-Term(TMT10)	0.0008164	46.43	0.00213177	2	1205.68	0.181142	0	1.10236	4	2.06909	1.10948	4	14.3142	1.09355	4	7.9497	1.00435	4	16.7722	1.07095	4	11.8435	0.768237	4	11.0193	1.1516	4	22.7079	0.92749	4	11.1636	0.893914	4	2.24594
sQVFNILR	1	B4E3Q4	N-Term(TMT10)	0.003642	22.49	0.544756	2	1205.72	3.31712	0	0.990495	1		1.13298	1		0.963265	1		0.955494	1		0.95029	1		0.940091	1		1.26316	1		0.991846	1		0.963655	1
sLESALk	5	O15143	N-Term(TMT10); K7(TMT10)	0.006808	36.06	0.0155458	2	1205.75	-0.454241	0	0.683994	5	11.7124	0.971051	5	5.37735	0.983285	5	8.0744	1.05628	5	4.28132	0.956546	5	7.24866	1.20336	5	7.99777	1.00406	5	4.56198	1.01346	5	2.58972	1.24407	5	4.68926
tLVSVTk	2	P07900	N-Term(TMT10); K7(TMT10)	0.004351	37.7	0.0162607	2	1205.79	0.555616	0	0.679985	2	9.35188	1.00193	2	0.935322	1.19966	2	7.67453	1.12238	2	6.51127	1.07528	2	31.3832	1.03557	2	10.5258	0.878768	2	0.747331	0.847653	2	1.77404	1.25383	2	12.755
vSSLTLk	2	H7BYX6	N-Term(TMT10); K7(TMT10)	0.007075	28.47	0.13889	2	1205.79	0.0494311	0	1.20842	2	1.20353	0.942124	2	3.39709	0.973822	2	1.11436	1.00364	2	0.678101	0.999504	2	17.8531	0.993079	2	8.26933	1.07796	2	5.53314	0.941429	2	4.99648	0.970732	2	16.6008
tTVSNVk	17	A0A087X1J7	N-Term(TMT10); K7(TMT10)	0.003647	35.58	0.0340887	2	1206.75	0.455928	0	1.11499	17	5.71422	1.01119	17	9.08917	1.0277	17	10.3791	1.08646	17	5.48428	0.930432	17	3.89992	0.910221	17	5.48492	0.98601	17	7.16809	1.00858	17	5.12057	0.929927	17	12.7545
lLIYGASSR	3	Q9UL78;A2KBC6;Q6P5S8	N-Term(TMT10)	0.002091	39.16	0.0204153	2	1208.72	-0.146493	0
fGSSLITVR	2	P80108	N-Term(TMT10)	7.129e-05	41.71	0.0109307	2	1208.72	2.37001	0	1.069	2	8.76214	0.889819	2	2.78585	0.971559	2	2.85792	1.07701	2	3.2195	0.895612	2	5.11662	0.978143	2	1.2941	1.06081	2	5.08324	1.13733	2	3.89977	0.962695	2	3.81545
vGYVSGWGR	7	P00738	N-Term(TMT10)	0.0003013	43.5	0.00244783	2	1209.66	0.866174	0	0.57233	7	27.9053	1.38362	7	10.9659	3.0568	7	6.22333	0.916327	7	7.25611	2.47832	7	24.8987	0.239593	6	97.4041	0.350161	7	48.7346	0.232983	5	54.799	0.376148	5	17.4944
nHQLIVTR	2	Q06033	N-Term(TMT10)	0.001589	29.09	0.077254	2	1209.73	1.25784	0	1.03243	2	9.26301	0.96876	2	1.2468	1.19775	2	2.15823	0.870953	2	2.97644	0.97557	2	9.75036	0.873673	2	1.6502	1.23092	2	15.0956	1.00954	2	1.29365	1.10604	2	0.624793
gASYILk	2	B4E3A8	N-Term(TMT10); K7(TMT10)	0.004498	32.44	0.0254008	2	1209.76	0.432125	0	0.531466	2	12.7746	1.00203	2	3.17147	0.918183	2	0.112975	1.0677	2	0.414819	0.913072	2	0.195	1.1967	2	5.13139	0.885051	2	7.90362	1.0675	2	1.7589	1.48413	2	2.76423
sIPQVSPVR	3	P15169	N-Term(TMT10)	0.005604	29.59	0.0568186	2	1211.73	1.62945	0	1.12248	3	3.63099	0.930819	3	0.102079	1.02875	3	4.14198	0.99455	3	4.36748	0.917624	3	14.6441	0.924955	3	7.99085	1.10322	3	1.60731	0.962168	3	10.5059	1.19913	3	19.5034
gLQGPPGk	3	P11226	N-Term(TMT10); K8(TMT10)	0.005024	39.73	0.00453857	2	1211.75	2.009	0	1.27615	3	3.96557	0.95997	3	4.49624	1.14471	3	3.82293	1.14283	3	2.79166	0.653276	3	24.625	0.763559	3	6.04291	0.733071	3	33.6574	1.35608	3	25.9964	0.757608	3	29.8739
sDFSNEER	13	A8K2N0;P48740	N-Term(TMT10)	0.0006715	40.45	0.00109541	2	1212.57	0.647161	0
qGSFQGGFR	16	P0C0L4;P0C0L5;A0A0G2JPR0	N-Term(TMT10)	0.000288	41.96	0.00376028	2	1212.63	0.233095	0
vVVHPDYR	14	Q9NZP8;Q9H804	N-Term(TMT10)	0.005586	36.03	0.0141568	3	1213.69	0.467239	0
cLAPLEGAR	22	P04217	N-Term(TMT10); C1(Carbamidomethyl)	0.0003818	49.19	0.000660962	3	1215.67	-1.1887	0	0.975982	22	13.6589	0.995767	22	9.46209	0.948824	22	7.59581	0.981127	22	4.09845	0.914742	22	10.7183	1.00857	22	5.78455	1.15342	22	11.4031	1.01228	22	6.16905	1.11096	22	11.3903
iPAcIAGER	1	P59665	N-Term(TMT10); C4(Carbamidomethyl)	0.003328	20.99	0.421566	2	1215.67	1.73437	0	0.767551	1		0.940556	1		1.17106	1		0.959901	1		1.74607	1		0.733454	1		0.980308	1		0.867806	1		1.06983	1
vQASQPk	4	A0A087X0M8;B3KX75	N-Term(TMT10); K7(TMT10)	0.004901	26.94	0.127147	2	1215.75	3.68715	0
aLENSPk	8	A0A0U1RR20	N-Term(TMT10); K7(TMT10)	0.006387	36.97	0.0120847	2	1216.73	0.163535	0	1.03381	8	9.43994	0.912754	8	5.23533	0.897893	8	5.83831	1.07375	8	3.57907	0.883852	8	4.90883	0.952717	8	3.05966	1.09998	8	7.40816	1.03421	8	2.72967	1.18106	8	7.14191
qAEAVLk	16	C0JYY2;Q7Z7Q0	N-Term(TMT10); K7(TMT10)	0.004542	40.61	0.00867223	2	1216.77	0.554102	0
aLVDTLk	26	C0JYY2	N-Term(TMT10); K7(TMT10)	0.004859	41.46	0.00345816	2	1217.79	0.44169	0	1.2048	26	4.0897	0.889265	26	5.99168	0.976986	26	8.02178	1.08592	26	4.21413	0.894805	26	6.65563	1.03245	26	4.35732	1.00041	26	6.89735	0.975157	26	3.98837	0.941184	26	5.80543
sPIAEAVFR	2	F2Z2Q9	N-Term(TMT10)	0.0002622	31.74	0.0557344	2	1218.71	3.26438	0	0.81822	2	10.8622	1.05996	2	5.65562	1.00261	2	12.2149	1.00129	2	1.07801	0.886667	2	8.00979	1.17294	2	6.08878	1.01681	2	2.78613	1.05465	2	0.270046	1.04549	2	13.9675
vAAGAFQGLR	5	P02750;Q68CK4	N-Term(TMT10)	0.0002422	55.53	0.00218055	3	1218.72	-0.0348385	0
vSQEGLk	23	C0JYY2	N-Term(TMT10); K7(TMT10)	0.006774	32	0.496122	2	1218.75	-0.358051	0	1.19331	23	6.86421	0.841641	23	7.08261	0.901491	23	4.20989	1.10353	23	3.56386	0.896748	23	5.50666	1.09183	23	5.43025	1.04319	23	6.36959	0.979986	23	3.99199	0.956967	23	5.55205
aYNRPTLR	3	P12259	N-Term(TMT10)	0.005573	16.05	2.16405	3	1219.71	-0.66955	0	1.1761	3	6.08802	1.01029	3	2.69876	1.10445	3	14.6733	0.916055	3	11.6355	1.02899	3	7.14008	0.875493	3	2.20159	1.19953	3	12.6864	0.954197	3	1.58507	1.07318	3	3.44909
vLPGHSAGPR	2	B7Z6Y5	N-Term(TMT10)	0.0002938	33.2	0.0439622	3	1219.71	0.139724	0	1.12887	2	6.70133	1.03432	2	3.08327	1.13461	2	16.1438	1.12124	2	7.49832	1.21414	2	36.0582	0.884407	2	12.2925	0.999117	2	30.3767	0.735561	2	16.3735	0.784211	2	11.4169
qGDVEcQR	3	P13671;A8K8Z4	N-Term(TMT10); C6(Carbamidomethyl)	0.002465	29.1	0.0165471	2	1220.59	0.309554	0
sLHMYANR	16	C0JYY2	N-Term(TMT10)	0.002206	42.16	0.00348765	3	1220.65	4.30669	0	1.20418	16	4.0955	0.933649	16	16.5845	0.997122	16	17.7608	1.28885	16	17.0732	1.12259	16	17.6669	1.00213	16	21.8884	0.966011	16	13.8007	0.741701	16	21.4994	0.882787	16	10.341
aQSEAEk	1	P26038	N-Term(TMT10); K7(TMT10)	0.006273	27.28	0.147129	2	1220.69	1.53524	0	0.669446	1		0.958759	1		0.885994	1		1.0569	1		0.790273	1		1.19999	1		0.933169	1		1.03992	1		1.56727	1
gLESQTk	53	P0C0L4;P0C0L5;B7Z1F8;A0A0G2JPR0	N-Term(TMT10); K7(TMT10)	0.001339	43.38	0.00444504	2	1220.73	1.83269	0
gISMLNk	6	Q06033	N-Term(TMT10); K7(TMT10)	0.003373	44.32	0.00304369	2	1220.74	0.862814	0	1.08743	6	7.65793	0.925306	6	2.52762	1.27881	6	4.22661	0.92859	6	12.2367	0.915584	6	12.7244	0.869196	6	5.87338	1.1501	6	5.42022	0.977385	6	10.5278	1.11059	6	7.4718
mESLGITSR	3	P07357	N-Term(TMT10)	0.001324	35.94	0.017051	2	1222.67	0.569645	0	1.02501	3	4.73289	1.01994	3	0.0425397	1.27365	3	2.08672	0.872373	3	2.83586	1.40343	3	1.91849	0.780048	3	4.12925	0.987101	3	4.4386	0.964852	3	5.98369	0.988787	3	5.19249
lLIYGASTR	1	Q9UL85	N-Term(TMT10)	0.0007694	23.51	0.482646	2	1222.74	-0.165259	0	1.10633	1		0.964008	1		1.44245	1		1.00897	1		1.57418	1		0.656104	1		0.800273	1		1.00486	1		0.558883	1
gEAFTLk	25	P01023	N-Term(TMT10); K7(TMT10)	0.004581	40.61	0.00649982	2	1223.74	-0.596441	0	1.65902	25	8.39748	1.34219	25	4.58953	1.55517	25	6.68902	1.73681	25	6.4247	1.68659	25	8.3856	0.289951	25	64.4793	0.293806	25	56.4543	0.177031	19	106.888	0.257253	16	42.0252
ccQDGVTR	9	P0C0L4;P0C0L5;A0A0G2JPR0	N-Term(TMT10); C1(Carbamidomethyl); C2(Carbamidomethyl)	0.00512	38.76	0.000957927	2	1224.57	-0.672903	0
aSYLDcIR	10	B4E1B2;Q53H26	N-Term(TMT10); C6(Carbamidomethyl)	0.001797	31.92	0.0287924	2	1226.64	0.759399	0
ePGLQIWR	14	P06396;B7Z9A0;B7Z992;V9H1C1	N-Term(TMT10)	0.007602	36.42	0.0151757	3	1227.7	-0.693333	0
aAAPNTPk	17	A0A0U1RR20	N-Term(TMT10); K8(TMT10)	0.002583	45.4	0.00166264	2	1227.75	2.05215	0	1.02672	17	6.78049	0.992957	17	5.98311	0.9796	17	7.21807	1.03638	17	3.68517	0.941712	17	8.71072	0.925024	17	6.58652	1.07649	17	7.41049	1.00776	17	8.56517	1.1263	17	10.5314
gASQAGAPQGR	15	P06396	N-Term(TMT10)	4.061e-07	60.78	3.27139e-05	2	1228.66	2.3602	0	1.2342	15	7.29551	0.974075	15	7.41016	0.832051	15	6.34746	1.04815	15	5.19564	0.780191	15	4.27304	1.01282	15	9.35387	1.12766	15	6.91364	0.939918	15	8.20705	1.13998	15	5.99813
sVGFHLPSR	12	C0JYY2	N-Term(TMT10)	0.0009051	38.95	0.00622106	3	1228.7	-1.19012	0	1.24226	12	15.3368	0.995975	11	7.90158	1.08359	11	12.1762	1.08878	12	7.31407	1.01546	12	11.9337	1.03442	12	16.0785	1.0072	11	7.34555	0.681467	11	28.5431	0.908861	11	5.9439
lALDNGGLAR	17	B2RMS9;B7ZKJ8;B7Z8Q7;B7Z544	N-Term(TMT10)	9.601e-06	46.63	0.00127429	2	1228.72	-0.733167	0
gQLVAVGk	1	Q6YHK3	N-Term(TMT10); K8(TMT10)	0.006857	32.88	0.027101	2	1229.8	2.41483	0	1.06349	1		0.859136	1		1.03701	1		0.892504	1		0.927222	1		1.05371	1		1.02143	1		1.09483	1		1.24078	1
lAcGVIGIAQ	2	P00441	N-Term(TMT10); C3(Carbamidomethyl)	7.833e-06	80.47	6.46149e-07	2	1230.71	0.590223	0	1.10318	2	7.39352	1.02639	2	8.07748	1.00232	2	9.89387	1.07059	2	3.23294	0.936163	2	14.6381	1.04729	2	3.42074	0.980439	2	5.75539	0.998874	2	8.25539	0.852839	2	1.5323
nLPEQVFR	10	B0AZL7	N-Term(TMT10)	0.001545	31.89	0.0462707	2	1231.7	-0.140303	0	1.0874	10	3.90056	0.952299	10	3.31352	0.903596	10	6.18464	0.980022	10	2.84464	0.905122	10	6.57517	1.01125	10	4.48053	0.992859	10	4.94784	1.10267	10	8.48542	1.15098	10	5.11438
iEEIAAk	14	P01031	N-Term(TMT10); K7(TMT10)	0.006643	37.18	0.021009	2	1231.77	1.60807	0	1.18821	14	4.28066	0.960472	14	5.0094	1.06525	14	4.32408	0.966302	14	5.70555	0.880306	14	11.1685	0.938839	14	4.44406	1.21146	14	3.31223	0.911126	14	3.99651	1.00202	14	6.06324
qVVAGLNFR	18	B4E1C2;B4DPP8	N-Term(TMT10)	8.149e-05	47.39	0.00147188	2	1232.73	-1.34778	0
aAALEFLNR	1	A8K690	N-Term(TMT10)	7.536e-05	33.72	0.0368145	2	1233.72	1.41468	0	0.66685	1		1.01816	1		1.03071	1		1.06022	1		1.00305	1		1.08809	1		0.956129	1		0.962082	1		1.33463	1
lLIYGASIR	1	A0A087WSY6	N-Term(TMT10)	0.0001434	31.18	0.0455723	2	1234.77	1.70413	0	1.25996	1		0.994402	1		1.42661	1		1.04579	1		1.87845	1		0.522596	1		0.654823	1		0.931461	1		0.351706	1
fQVDNNNR	28	P01023	N-Term(TMT10)	0.003575	38.51	0.00541167	2	1235.63	1.22672	0	1.50553	28	14.5598	1.38044	28	12.8423	1.38175	28	15.2834	1.54778	28	18.0947	1.54262	28	18.8483	0.43273	28	66.4949	0.418362	28	92.7333	0.427924	20	45.7926	0.523207	20	49.2382
sNMGGSPk	25	B4E1Z4;A0A1U9X8W4	N-Term(TMT10); K8(TMT10)	0.0005406	40.42	0.00630481	2	1235.68	1.62678	0
gTLSTTITGR	2	Q1HP67	N-Term(TMT10)	2.023e-05	25.74	0.207215	2	1235.72	1.30245	0	0.800919	2	14.1799	1.00993	2	24.5259	1.93465	2	8.26244	1.40297	2	8.28979	1.27824	2	11.2467	0.71194	2	17.13	0.658603	2	1.17694	0.404851	2	25.48	0.917172	2	28.2184
lEYLLLSR	3	B0AZL7	N-Term(TMT10)	0.0004922	37.95	0.00865753	2	1235.76	-0.86653	0	1.16002	3	1.55791	1.002	3	5.34981	1.03949	3	6.40888	0.988988	3	4.94313	0.85447	3	5.47445	0.903531	3	1.04333	0.992342	3	11.9566	1.141	3	5.6424	0.993821	3	0.52732
sAQEcQER	1	P03951	N-Term(TMT10); C5(Carbamidomethyl)	0.0002118	34.93	0.00355109	2	1236.58	0.275666	0	1.05694	1		1.00081	1		1.02464	1		1.01408	1		0.897383	1		0.912112	1		1.03541	1		0.980571	1		1.23228	1
iQQNTFTR	4	P21333	N-Term(TMT10)	0.0004827	32.5	0.0731044	2	1236.69	1.60651	0	0.684526	4	13.8491	0.998047	4	11.6391	1.38329	4	5.75388	0.917321	4	7.88858	0.810357	4	17.3479	1.09501	4	8.1121	0.827486	4	9.64053	0.75366	4	10.7569	1.84068	4	17.5923
iAAFQTk	2	Q9ULI3	N-Term(TMT10); K7(TMT10)	0.005951	26.03	0.165766	2	1236.77	0.1883	0	1.16212	2	3.52765	0.874256	2	0.12219	1.20063	2	19.1826	0.944043	2	1.66599	1.14854	2	33.3741	0.929103	2	15.7874	1.14578	2	15.8909	0.923268	2	15.1316	0.824912	2	14.0512
vTMSVDk	3	A2NYU9	N-Term(TMT10); K7(TMT10)	0.004252	30.07	0.142928	2	1237.72	0.51619	0	1.881	3	9.59789	1.11109	3	1.17921	1.28804	3	3.89344	0.730384	3	4.71425	2.40962	3	8.34786	0.465497	3	14.6924	0.587577	3	11.4922	0.408203	3	24.1875	0.448971	3	34.8653
aALSMck	3	P41222	N-Term(TMT10); C6(Carbamidomethyl); K7(TMT10)	0.001446	35.08	0.0313716	2	1238.7	2.12891	0	1.27893	3	4.87618	1.04227	3	7.21196	1.21848	3	5.95358	0.848255	3	11.1596	0.99842	3	2.68414	0.900586	3	4.4226	1.17344	3	1.8121	0.956351	3	5.35124	0.819319	3	0.208144
aENFFILR	2	P59998	N-Term(TMT10)	0.0004672	37.24	0.0191254	2	1238.71	0.293181	0	0.660373	2	46.4267	1.05832	2	7.12112	0.922172	2	14.4904	1.10895	2	4.96699	0.799534	2	6.87383	1.25677	2	11.1122	0.845379	2	2.78089	1.16238	2	1.93351	1.08536	2	11.0182
lTFGGGTk	2	A0A1W6IYL0	N-Term(TMT10); K8(TMT10)	0.0008307	33.43	0.033864	2	1238.75	3.2251	0	1.09764	2	1.47088	0.894884	2	4.98442	1.6654	2	13.3792	0.954571	2	0.170108	2.67674	2	1.85739	0.423522	2	11.7422	0.570172	2	2.63144	0.585905	2	40.0028	0.351833	2	10.4247
vEETcGcR	2	P04275;L8E853	N-Term(TMT10); C5(Carbamidomethyl); C7(Carbamidomethyl)	0.003972	27.54	0.0100433	2	1239.57	0.29081	0
vTSGSTTTTR	17	P02671	N-Term(TMT10)	8.95e-05	41.98	0.00304257	2	1239.67	0.589716	0	1.21423	17	7.05474	0.980735	17	7.31446	1.30401	17	6.65396	0.960629	17	4.48591	1.29093	17	6.64134	0.714935	17	10.9502	1.11273	17	7.09319	0.79652	17	7.44125	0.779149	17	12.4193
nFATSNk	23	C0JYY2	N-Term(TMT10); K7(TMT10)	0.003398	32.42	0.039752	2	1239.71	2.1494	0	1.15137	23	8.80246	0.862032	23	5.7281	0.955682	23	5.02655	1.144	23	6.03548	0.862796	23	15.7613	1.08831	23	6.89564	1.05298	23	10.2027	0.966125	23	10.676	0.905991	23	9.90332
sSGAFWk	7	P25311	N-Term(TMT10); K7(TMT10)	0.007323	34.94	0.034243	2	1240.71	-0.322023	0	1.18233	7	6.47519	0.984429	7	0.921301	1.08942	7	7.8043	0.971646	7	2.98531	0.916377	7	5.43026	0.916031	7	2.63102	1.17209	7	1.83347	0.923084	7	13.635	1.02807	7	9.99004
gSFSTTVTGR	4	Q1HP67	N-Term(TMT10)	0.0001163	43.56	0.0018261	2	1241.67	1.55323	0	0.284861	4	16.6066	0.279131	4	47.4445	1.76793	4	4.76969	1.6067	4	8.38644	0.872786	4	35.2496	1.08868	4	11.0741	1.00451	4	11.121	0.356878	4	25.8086	1.88266	4	7.06087
sGFSSVSVSR	1	B4DRR0	N-Term(TMT10)	0.003822	23.8	0.199889	2	1241.67	2.33972	0	1.01843	1		1.02587	1		1.25725	1		1.03876	1		1.07415	1		1.02341	1		1.05781	1		1.00003	1		0.572019	1
nEALIALLR	2	P13796	N-Term(TMT10)	1.729e-05	54.17	0.000144134	2	1241.78	2.6029	0	1.02719	2	2.77193	1.04651	2	2.90951	1.07268	2	2.91829	0.976819	2	0.760291	0.951352	2	3.13283	0.988594	2	2.18032	1.0942	2	10.1808	1.0247	2	2.47797	0.933066	2	13.3321
qFPSLEHR	4	P03951	N-Term(TMT10)	0.002617	47.74	0.000649512	3	1242.68	-1.30914	0	1.14529	4	9.05035	1.02651	4	8.7135	1.11309	4	5.12287	1.01882	4	4.24399	1.04917	4	7.64885	0.95373	4	3.52659	0.924361	4	9.73357	0.850791	4	5.25992	1.05652	4	6.73233
lVAASQAALGL	18	P02768;F6KPG5	N-Term(TMT10)	8.571e-05	61.81	3.08493e-05	2	1242.76	-0.158479	0
gPALTTPk	4	A0A0U1RR20	N-Term(TMT10); K8(TMT10)	0.003335	29.7	0.0379318	2	1242.78	1.0135	0	1.07552	4	4.19796	0.9184	4	4.75217	1.16142	4	9.17832	1.13157	4	5.76748	1.45443	4	17.1	0.829865	4	11.7811	0.685291	4	10.4646	0.88407	4	3.41771	0.881828	4	4.12446
gAEGDLAPER	1	B5MDP7	N-Term(TMT10)	0.004714	19.37	0.364175	2	1243.65	1.1244	0	1.04518	1		0.966221	1		0.971592	1		0.88331	1		0.958974	1		1.0163	1		1.34305	1		1.01843	1		1.01521	1
mSESGFk	35	A0A024R462;B4DU16;B4DN21	N-Term(TMT10); K7(TMT10)	0.003396	30.61	0.0378432	2	1243.68	-0.211198	0
fLQEQGHR	20	P07360	N-Term(TMT10)	0.001515	37.4	0.00945335	3	1243.68	5.55394	0	1.07777	20	7.7893	0.958631	20	8.55473	1.05424	20	8.28341	1.00941	20	5.74198	0.94765	20	5.26283	0.891705	20	8.75589	1.09973	20	12.7724	0.966295	20	6.83949	1.13862	20	7.34579
lLTEHVFR	1	B7ZLI0	N-Term(TMT10)	0.0007544	44.4	0.00262869	3	1243.74	-0.642947	0	1.13845	1		1.05503	1		0.971557	1		0.862545	1		0.929947	1		1.03276	1		1.03504	1		0.981708	1		1.18284	1
sIQLPTTVR	1	P15144	N-Term(TMT10)	0.001287	44.35	0.00199985	2	1243.76	0.928701	0	1.03405	1		1.01021	1		0.937975	1		0.906696	1		1.00942	1		0.993476	1		1.03757	1		1.10695	1		1.094	1
gIIIQGGk	2	E7EX60	N-Term(TMT10); K8(TMT10)	0.0007692	32.31	0.0262608	2	1243.81	-0.871161	0	1.1144	2	6.9372	1.06525	2	17.1173	0.954998	2	8.67224	0.938601	2	16.8714	0.933839	2	7.43415	0.9383	2	0.903475	1.11332	2	12.1191	1.11155	2	33.9316	0.855956	2	21.7748
fLIDTHNR	1	Q6YHK3	N-Term(TMT10)	0.005008	29.72	0.0687954	3	1244.7	0.0704261	0	1.09257	1		1.29052	1		0.92604	1		0.914414	1		0.791274	1		0.966437	1		0.987301	1		1.04223	1		1.08094	1
dISEVVTPR	41	B4E1Z4;H7C5H1	N-Term(TMT10)	0.0008093	51.24	0.000521626	3	1244.71	0.567382	0
dILTIDIGR	9	Q16610	N-Term(TMT10)	0.0002522	44.16	0.00288548	2	1244.74	0.812858	0	1.19299	9	8.89797	0.905516	9	3.54144	0.915618	9	11.6788	0.982493	9	5.68901	1.07982	9	7.68219	0.93238	9	4.43815	1.09074	9	8.03676	1.10863	9	4.15081	0.786573	9	9.87979
eQWILTAR	5	P26927	N-Term(TMT10)	0.006805	29.73	0.101253	2	1245.72	0.821128	0	1.03238	5	5.2826	0.935767	5	2.48628	0.981833	5	3.85144	0.942886	5	2.09717	0.957601	5	6.90585	1.01196	5	3.47092	1.11674	5	4.14113	1.11249	5	4.20529	1.06264	5	5.29053
vANPcVk	24	P01008	N-Term(TMT10); C5(Carbamidomethyl); K7(TMT10)	0.003398	31.92	0.0612803	2	1245.74	0.253754	0	1.02939	24	11.1318	0.857995	24	11.2637	0.923322	24	6.81575	1.04815	24	7.8696	0.948972	24	20.3358	1.00741	24	5.11466	1.14323	24	7.56802	0.958285	24	6.24682	1.11967	24	10.1582
aLDLLDk	8	B4DHN0	N-Term(TMT10); K7(TMT10)	0.006191	37.78	0.0149385	2	1245.78	-0.193846	0	1.16275	8	8.41895	0.98963	8	9.69813	1.03025	8	8.12654	1.06745	8	5.4196	0.987746	8	17.6963	0.935742	8	8.92009	1.09157	8	11.7528	0.937985	8	9.25205	0.86172	8	25.0811
fAHTVVTSR	15	B2RMS9;B7ZKJ8;B7Z544	N-Term(TMT10)	0.004603	32.35	0.03708	2	1246.71	0.819877	0
fSAEFDFR	16	P07225;Q16519	N-Term(TMT10)	0.003816	33.13	0.0141301	2	1247.62	-1.03716	0
aLVcQAk	3	P19320	N-Term(TMT10); C4(Carbamidomethyl); K7(TMT10)	0.00262	39.81	0.0112203	2	1247.76	1.50512	0	1.23754	3	3.75942	0.936734	3	3.24197	0.84951	3	0.8639	1.06272	3	0.732419	0.751104	3	1.52675	0.935945	3	2.36233	1.38026	3	0.936516	1.02653	3	0.000559738	0.933537	3	3.65808
gGTLSMPk	2	Q9BWP8	N-Term(TMT10); K8(TMT10)	0.002875	32.64	0.0604126	2	1248.74	0.512606	0	1.00742	2	7.21458	0.864895	2	6.05736	0.989244	2	6.87588	0.903974	2	13.406	0.629824	2	2.77452	1.16531	2	9.57512	1.15791	2	20.8734	1.1992	2	2.65586	1.21953	2	0.649358
aTVEDEk	3	P11142	N-Term(TMT10); K7(TMT10)	0.004757	30.7	0.0670271	2	1249.7	-0.698327	0	0.520172	3	14.3543	0.931227	3	2.86369	1.05539	3	1.64108	1.08688	3	1.61628	0.867325	3	6.60297	1.20819	3	2.64432	0.969929	3	5.12299	0.99582	3	2.72553	1.41982	3	16.2493
vcALGGSk	7	O75083;Q53GN4	N-Term(TMT10); C2(Carbamidomethyl); K8(TMT10)	0.0003892	38.69	0.0128176	2	1249.73	-0.0776588	0
eTLLQDFR	20	P02760	N-Term(TMT10)	0.002639	34.1	0.0266885	2	1250.69	0.29134	0	1.18827	20	7.82765	1.01093	20	4.62031	1.17522	20	6.68733	0.893174	20	4.41267	1.10675	20	10.3149	0.806454	20	4.29102	1.05714	20	6.19033	0.896524	20	5.50993	1.00176	20	6.76764
gITMATAk	3	Q9Y4G6;Q9Y490	N-Term(TMT10); K8(TMT10)	8.646e-05	54.15	0.000224217	2	1250.76	3.71249	0
aTVVYQGER	66	D9IWP9	N-Term(TMT10)	0.000556	46.61	0.00152245	3	1251.69	1.13311	0	1.21044	66	10.9513	0.990088	66	6.8055	0.969328	66	7.09998	0.943835	66	6.98013	0.944634	66	15.179	0.996042	66	8.65932	1.12648	66	11.4406	0.867096	66	10.1784	1.12322	66	9.72183
yGIDWASGR	6	O75636	N-Term(TMT10)	0.0003827	31.3	0.0322841	2	1253.65	-0.789103	0	1.17087	6	4.86163	1.06368	6	2.34739	0.819827	6	2.71089	0.994406	6	6.46713	1.02967	6	18.1996	1.10383	6	5.20535	1.09613	6	6.38601	1.0852	6	4.43588	0.728032	6	8.83182
lTSSEMk	6	P12259;Q2HZY9	N-Term(TMT10); K7(TMT10)	0.005541	22.36	0.800584	2	1253.72	1.94063	0
gISMSSSk	6	Q9Y490	N-Term(TMT10); K8(TMT10)	8.429e-05	43.22	0.00364946	2	1254.71	0.860345	0	0.469552	6	12.8059	1.00065	6	14.1838	1.09439	6	11.9374	1.06962	6	3.26293	0.771683	6	10.9051	1.33626	6	18.0331	0.873193	6	2.86903	0.957992	6	9.56568	1.36539	6	1.96774
iGGIGTVPVGR	1	Q53G89	N-Term(TMT10)	0.003194	28.13	0.0770615	2	1254.78	2.17027	0	0.830473	1		1.04204	1		0.907096	1		0.868763	1		1.08787	1		1.15967	1		0.992714	1		1.03317	1		1.23176	1
nVHSAGAAGSR	25	B7Z544	N-Term(TMT10)	8.521e-08	64.62	1.41682e-05	2	1255.67	0.150195	0	1.05998	24	6.78434	1.00127	25	14.6728	0.993074	24	17.0923	0.876531	25	4.28405	0.993359	25	12.6246	0.974363	25	13.3057	1.20063	25	10.6685	0.918308	25	42.7321	1.21052	25	24.7118
gTFSTTVTGR	4	Q1HP67	N-Term(TMT10)	5.445e-06	42.61	0.00259061	2	1255.68	0.446626	0	0.345379	4	7.50305	0.394717	4	29.419	1.78906	4	6.13661	1.53469	4	11.0762	0.667547	4	10.7333	1.0944	4	2.29256	0.997507	4	4.07043	0.506715	4	19.1392	1.85511	4	5.48825
rNFGYTLR	1	P05546	N-Term(TMT10)	0.0005618	39.49	0.00681511	3	1255.71	-0.431628	1	0.914718	1		0.97429	1		1.05331	1		0.940093	1		0.777312	1		1.17541	1		1.1573	1		1.09636	1		1.04754	1
aAFcYQIR	2	P26927	N-Term(TMT10); C4(Carbamidomethyl)	0.001267	31.48	0.0236478	2	1257.66	1.45839	0	1.00778	2	0.18968	1.01371	2	0.715817	0.97095	2	10.3302	1.04298	2	0.461791	0.78323	2	3.83741	0.976755	2	6.12113	1.17343	2	1.80326	0.994324	2	3.90048	1.16686	2	2.30682
ySFTIELR	3	Q96IY4	N-Term(TMT10)	0.001883	25.77	0.148713	2	1257.7	-1.01527	0	1.26533	3	2.48105	1.05525	3	12.0653	1.15665	3	2.76936	0.954037	3	1.43857	1.07621	3	12.0972	0.817786	3	3.25059	1.14574	3	5.58253	0.938933	3	0.252904	0.727593	3	1.98158
tIPWLENR	4	P12814	N-Term(TMT10)	0.003181	34.8	0.0205136	2	1257.72	0.522122	0	0.581681	4	28.4122	0.950001	4	6.37748	1.10354	4	5.9462	1.11798	4	3.31268	0.849235	4	3.18376	1.25524	4	1.00936	0.834132	4	8.61252	0.992533	4	1.14921	1.389	4	15.5247
mIYASSk	2	P23528;F6RFD5	N-Term(TMT10); K7(TMT10)	0.005728	21.78	0.359085	2	1257.73	2.8826	0
tLEAQLTPR	33	P05546	N-Term(TMT10)	0.0006125	55.96	0.000145897	3	1257.73	-2.6523	0	0.958072	33	6.31629	1.0149	33	7.09483	0.999697	33	7.19992	0.942928	33	5.0935	0.94574	33	7.12005	0.98443	33	6.04575	1.08594	33	6.53879	1.0651	33	6.7575	1.15809	33	7.01348
qIQVSWLR	4	P01871;Q86TT1	N-Term(TMT10)	0.004859	27.15	0.117194	2	1258.74	-3.2714	0
eLANILk	5	Q15582	N-Term(TMT10); K7(TMT10)	0.006721	31.37	0.0440228	2	1258.81	0.476014	0	1.39228	5	2.7212	0.922876	5	1.57453	0.956373	5	1.23643	0.942658	5	9.58448	0.896811	5	2.98574	0.87786	5	2.2002	1.18605	5	3.26433	0.992098	5	1.98272	0.930915	5	4.64515
yFIDFVAR	7	B4E1C2;B4DPP8	N-Term(TMT10)	0.0008315	31.52	0.0450299	2	1259.7	2.65031	0
vSSFYAk	10	C0JYY2	N-Term(TMT10); K7(TMT10)	0.006715	35.51	0.018418	2	1259.74	0.211689	0	1.20554	10	7.86879	0.891132	10	6.57864	0.975277	10	2.74383	1.11451	10	3.49209	0.908802	10	4.41927	1.11268	10	5.04833	1.02433	10	7.10943	0.952002	10	4.6254	0.894649	10	8.08813
aLQASALk	7	P04075	N-Term(TMT10); K8(TMT10)	0.0005734	48.3	0.00139332	2	1259.81	-0.308056	0	0.695978	7	29.5827	1.01066	7	5.00733	0.875234	7	10.1077	1.06817	7	3.22041	0.866564	7	5.08599	1.10632	7	7.80701	0.991035	7	4.48166	0.997441	7	2.49651	1.36884	7	12.1862
dLLLTVk	22	B1AHL2;B4DUV1	N-Term(TMT10); K7(TMT10)	0.007036	32.8	0.0215696	2	1259.83	-2.34562	0
dIAANEENR	1	O75368	N-Term(TMT10)	1.86e-05	47.24	0.000723101	2	1260.64	0.498354	0	0.667491	1		0.75567	1		0.993021	1		1.07961	1		1.21124	1		1.17306	1		0.972297	1		1.17449	1		1.00477	1
vLEEEEQR	2	C9J813	N-Term(TMT10)	0.0002462	40.68	0.00493373	2	1260.67	1.36703	0	0.491285	2	48.6725	0.941008	2	3.96381	1.16969	2	21.4976	0.924294	2	2.99861	0.778453	2	4.50523	1.40486	2	7.57793	0.947496	2	13.8799	0.936935	2	2.31788	1.59484	2	5.62396
eRELEEAR	2	Q9Y4G6;Q9Y490	N-Term(TMT10)	0.00471	27.63	0.093109	3	1260.67	-0.273103	1
lSPLGEEMR	12	P02647	N-Term(TMT10)	2.476e-05	52.47	0.000313413	2	1260.68	-0.249925	0	0.698032	12	21.6349	0.677704	12	25.178	0.610169	12	39.5179	1.22733	12	9.60775	3.42888	12	46.3967	0.551222	12	37.6475	0.681649	12	32.5322	0.558275	12	49.2372	0.523311	12	61.7164
gALHNYk	32	P01031	N-Term(TMT10); K7(TMT10)	0.001834	40.17	0.00968344	2	1260.75	1.65573	0	1.23548	32	7.17911	0.970827	32	5.2014	1.10288	32	8.70306	0.970087	32	6.78213	0.847386	32	9.34573	0.957445	32	6.58679	1.23851	32	7.38709	0.897771	32	7.714	0.967638	32	7.4973
aAAVGTANk	12	A0A024QZN4;B4E3Q9	N-Term(TMT10); K9(TMT10)	5.82e-06	53.01	0.000512785	2	1260.77	0.751118	0
iLADATAk	5	Q9Y490	N-Term(TMT10); K8(TMT10)	0.005193	30.32	0.0672572	2	1260.79	1.1356	0	0.723654	5	30.6489	1.0248	5	2.09771	1.07375	5	7.61334	1.04465	5	6.19299	0.970913	5	10.9474	1.07893	5	4.86583	0.994377	5	13.3597	0.947547	5	8.56083	1.22552	5	11.3959
aLIQcAk	3	A0A024QZN4	N-Term(TMT10); C5(Carbamidomethyl); K7(TMT10)	0.002429	35.36	0.0297184	2	1261.77	1.95231	0	0.498397	3	13.6081	1.01599	3	7.99469	0.865273	3	10.8887	1.19709	3	1.35531	0.751599	3	6.98834	1.1121	3	0.623273	0.925288	3	6.1176	1.09112	3	3.07481	1.50012	3	11.3475
lQAEAFQAR	13	P02649;A0A0S2Z3V0	N-Term(TMT10)	9.478e-06	49.03	0.00100458	2	1262.71	0.377694	0
aQLVDMk	24	P02671	N-Term(TMT10); K7(TMT10)	0.006231	41.03	0.00808582	2	1262.75	0.197109	0	1.26688	24	6.93389	0.985421	24	3.50329	1.32685	24	7.15482	0.910218	24	3.06632	1.32179	24	3.94124	0.684919	24	6.55341	1.10441	24	3.93275	0.877979	24	4.2947	0.752361	24	5.69366
aLASIDSk	10	A0A024QZN4;B4E3Q9	N-Term(TMT10); K8(TMT10)	0.0001895	45.5	0.00248581	2	1262.77	1.12435	0
sVQLTEk	5	P01024	N-Term(TMT10); K7(TMT10)	0.007452	34.51	0.0312226	2	1262.77	1.22894	0	0.996204	5	1.94036	0.91138	5	20.286	1.08415	5	2.31712	1.03111	5	5.77067	1.10609	5	13.9321	0.847709	5	5.27419	0.842398	5	11.7939	1.01197	5	3.32846	1.15389	5	5.27096
iFEEHGFR	7	B4DN21	N-Term(TMT10)	0.001643	27.65	0.0929388	2	1263.67	0.385814	0	1.29415	7	5.54473	0.745749	7	6.75904	0.901625	7	7.59059	0.90843	7	8.38274	1.08285	7	6.5951	1.06129	7	8.90251	1.14712	7	6.74987	1.05443	7	3.7885	0.886413	7	15.9804
aIcQEGk	6	B2RA39	N-Term(TMT10); C3(Carbamidomethyl); K7(TMT10)	0.002538	35.76	0.0210776	2	1263.72	2.42525	0	1.31113	6	5.57915	0.82699	6	4.51747	1.0401	6	2.08346	0.791045	6	10.0376	0.901304	6	5.5627	1.01287	6	4.34265	1.07259	6	5.59418	1.08078	6	3.38463	1.19884	6	2.62765
tFISPIk	2	P01024	N-Term(TMT10); K7(TMT10)	0.007525	30.1	0.0588785	2	1263.81	1.31228	0	1.12481	2	3.27819	1.01444	2	1.57799	1.06391	2	7.28638	1.02628	2	8.29085	1.04783	2	1.22713	0.845689	2	4.81048	0.856673	2	3.31522	1.08472	2	11.048	0.99264	2	1.87372
qTVEAMk	26	A2RTY6	N-Term(TMT10); K7(TMT10)	0.001334	42.39	0.00482177	2	1264.73	0.573424	0	1.1335	26	5.66843	0.922364	26	6.87934	0.920032	26	4.98138	1.01596	26	3.35066	0.860506	26	5.64978	0.94703	26	4.54854	1.18247	26	7.23829	1.08056	26	4.45187	1.09691	26	6.81075
qLHGLLQAR	3	B2R7D2	N-Term(TMT10)	0.007235	35.88	0.0145123	2	1264.77	2.47862	0	1.07788	3	20.9095	1.12241	3	7.0691	0.994215	3	7.79547	1.05345	3	8.53284	1.18874	3	9.44917	0.876527	3	17.5602	1.132	3	7.38377	0.983934	3	3.97208	0.84611	3	3.85643
lHAVPAAk	2	E9PQ40	N-Term(TMT10); K8(TMT10)	0.003702	33.29	0.0176274	2	1264.82	3.22545	0	1.18317	2	13.8969	1.0623	2	3.23397	0.997979	2	16.7887	0.922137	2	6.7207	0.9223	2	14.3816	0.990655	2	1.63268	1.11256	2	2.53654	1.01944	2	6.84702	0.899528	2	12.5788
dFcGGVIIR	8	P22891	N-Term(TMT10); C3(Carbamidomethyl)	0.005725	33.29	0.0294649	2	1265.68	-2.01887	0	1.00028	8	8.09176	0.902177	8	4.84801	0.983829	8	3.25703	1.05838	8	3.30392	1.10092	8	8.18169	0.910257	8	5.47189	1.12795	8	10.8465	0.976234	8	6.19086	1.09225	8	5.99625
qFVQSAk	7	Q9Y490	N-Term(TMT10); K7(TMT10)	0.007548	32.81	0.0373327	2	1265.76	1.11071	0	0.55948	7	16.2865	1.0427	7	8.60046	1.01129	7	4.29256	1.04641	7	4.25211	0.776945	7	5.66542	1.18501	7	7.60031	0.986536	7	2.62664	1.00359	7	6.79497	1.54443	7	8.95736
gFTIPEAFR	5	A0A1U9X8Y4	N-Term(TMT10)	0.00501	27.2	0.116614	2	1266.71	0.827844	0	0.548572	5	5.32655	1.01635	5	10.0319	0.875907	5	6.90625	1.14798	5	3.10854	0.931952	5	3.45604	1.15608	5	7.52013	0.939302	5	2.34351	1.04583	5	10.1288	1.40327	5	1.73976
gAFFPLTER	1	P55058	N-Term(TMT10)	0.004016	28.05	0.098157	2	1266.71	2.08063	0	1.14166	1		0.895245	1		0.969026	1		0.986155	1		1.05881	1		0.964989	1		1.15927	1		1.05271	1		0.89278	1
lLIYDASSR	2	A0A0C4DH25	N-Term(TMT10)	0.0004041	30.35	0.0637036	2	1266.73	-0.418493	0	0.912191	2	29.0112	1.03295	2	29.8823	1.54617	2	7.59377	1.1293	2	4.2459	1.86708	2	2.04642	0.620164	2	40.0359	0.712339	2	26.063	0.715897	2	32.2737	0.485647	2	9.19536
lAPGELTIIL	17	C0JYY2;Q59HB3	N-Term(TMT10)	0.0001388	57.96	3.55102e-05	2	1268.8	0.207136	0
wLDLSHNR	11	B0AZL7	N-Term(TMT10)	0.0007164	51.12	0.000384022	3	1269.69	0.228827	0	1.28506	11	14.9323	0.976425	11	10.2236	0.966101	11	11.0336	1.0142	11	10.5649	1.19191	11	18.141	0.873216	11	17.1954	0.976981	11	3.0574	0.904175	11	7.00426	0.952823	11	13.9735
fAAFIDk	1	P78386;A0JNT2	N-Term(TMT10); K7(TMT10)	0.004429	23.52	0.24099	2	1269.76	0.107545	0
qEEETHIR	1	A0A024RD39	N-Term(TMT10)	0.007768	15.61	0.768036	3	1270.66	-0.667851	0	0.944963	1		1.03967	1		0.839884	1		1.01466	1		1.07691	1		0.994436	1		1.07341	1		0.944575	1		1.18994	1
fSVVYAk	31	P02765;B7Z556	N-Term(TMT10); K7(TMT10)	0.003217	39.3	0.00760159	2	1271.78	-0.0885251	0
cVPVcGVPR	4	A8K2N0	N-Term(TMT10); C1(Carbamidomethyl); C5(Carbamidomethyl)	0.0009202	35.97	0.00905489	2	1272.67	-0.582304	0	0.998477	4	7.59229	1.00745	4	5.09324	1.04441	4	3.76896	0.979787	4	1.58034	0.924385	4	5.40901	1.02561	4	4.66133	1.19911	4	3.05729	0.953547	4	1.65468	1.05361	4	6.01434
aNVFVQLPR	5	B0AZL7	N-Term(TMT10)	6.029e-05	48.44	0.000771233	2	1272.76	-0.0978418	0	1.1517	5	10.3487	0.896506	5	7.62384	1.17896	5	27.235	0.96877	5	35.4868	0.930682	5	21.2203	0.950613	5	7.54814	1.09505	5	3.60204	1.12321	5	9.73464	1.02371	5	12.0618
aLEALVAk	1	P14550	N-Term(TMT10); K8(TMT10)	0.002173	26.09	0.132491	2	1272.82	-4.25607	0	0.684909	1		0.994675	1		0.999488	1		1.07264	1		0.966943	1		1.16764	1		1.00246	1		1.01298	1		1.17167	1
aLDYYMLR	4	Q9Y490	N-Term(TMT10)	0.001354	33.28	0.0232833	2	1273.68	0.0617995	0	0.638943	4	13.2753	1.0831	4	2.47965	1.03744	4	2.4462	1.07681	4	1.52599	0.926209	4	1.76083	1.17102	4	2.46885	0.975198	4	2.36849	1.07758	4	4.51172	1.01112	4	6.9488
iMSIVDPNR	4	P12814	N-Term(TMT10)	0.001924	37.32	0.0113436	2	1273.71	-0.929062	0	0.591731	4	24.5853	0.774891	4	4.79229	0.97	4	11.0626	1.13721	4	1.43362	1.151	4	18.5853	1.16636	4	3.08383	0.858593	4	3.18856	1.09704	4	3.4799	1.16958	4	7.86976
lLcGLLAER	2	P14174	N-Term(TMT10); C3(Carbamidomethyl)	0.002174	41.57	0.00435043	2	1273.75	-1.22207	0	0.59912	2	26.5082	1.08347	2	14.3458	0.977699	2	12.9689	1.28335	2	1.38872	0.924565	2	13.013	0.928888	2	1.8509	0.920734	2	4.44031	1.05982	2	9.29474	1.14668	2	8.20069
gEQIQLk	17	P01031	N-Term(TMT10); K7(TMT10)	0.00433	27.32	0.176178	2	1273.79	-0.601557	0	1.20485	17	2.73314	0.977576	17	2.69808	1.10736	17	4.79306	0.953579	17	5.45034	0.877948	17	7.82825	0.938958	17	4.72033	1.21493	17	4.14826	0.944161	17	4.78451	0.999657	17	4.85931
vTVAGLAGk	2	Q99497	N-Term(TMT10); K9(TMT10)	0.0001058	37.96	0.0150838	2	1273.82	-0.332143	0	0.750825	2	1.81446	0.877894	2	18.3428	1.12968	2	17.4026	1.11158	2	0.365103	0.987798	2	4.74774	1.05919	2	3.22457	1.00205	2	1.93059	0.990317	2	1.0768	1.18574	2	11.2003
vNAWQAk	2	P12259	N-Term(TMT10); K7(TMT10)	0.005352	34.37	0.0277304	2	1274.76	-1.55783	0	1.06554	2	0.45896	0.86238	2	3.35632	1.02188	2	7.67936	0.897607	2	2.37359	0.978459	2	12.9964	0.953544	2	9.62398	1.26628	2	8.49152	1.06716	2	3.5265	1.10579	2	4.73391
aLMSPAGMLR	1	O75144	N-Term(TMT10)	0.0003246	29.85	0.074582	2	1275.71	-2.63839	0	1.12647	1		1.0155	1		1.0239	1		0.987816	1		1.22153	1		0.798404	1		0.950508	1		1.16542	1		0.755644	1
eFSHLGk	57	P02774;D6RF20	N-Term(TMT10); K7(TMT10)	0.006558	31.32	0.0729787	2	1275.75	1.12161	0
vVLSQGSk	7	I3L145	N-Term(TMT10); K8(TMT10)	0.0001439	37.76	0.011331	2	1275.8	0.336609	0	1.23747	7	6.56395	1.01628	7	7.45321	0.757427	7	7.82976	0.968076	7	1.4217	0.665092	7	5.78559	0.95709	7	4.46587	1.80501	7	8.33664	0.719662	7	9.38256	1.16224	7	4.99812
vAAEDWk	32	Q96K68;Q8NCL6;Q6MZW0;Q6ZVX0;Q7Z379;Q9NPP6;Q6P089;Q6ZW64;Q6N041;P0DOX2	N-Term(TMT10); K7(TMT10)	0.005031	29.01	0.112603	2	1276.73	-0.521264	0
qATLTISSAR	2	A0A0U2N547	N-Term(TMT10)	2.605e-05	30.88	0.0782286	2	1276.74	-0.125532	0	1.07341	2	3.44984	1.02181	2	3.6708	0.955667	2	12.0915	0.956112	2	5.50573	1.10802	2	6.98257	1.00388	2	0.751144	0.958756	2	1.93858	0.949038	2	9.89893	1.09622	2	1.2833
vLNcQGk	3	Q8NBP7	N-Term(TMT10); C4(Carbamidomethyl); K7(TMT10)	0.004565	37.29	0.0176373	2	1276.74	-1.62595	0	1.1967	3	8.5104	0.967504	3	4.5632	0.913996	3	8.08982	1.01464	3	7.19216	0.868842	3	0.000349654	0.976398	3	5.05565	1.16312	3	3.58154	1.053	3	1.24524	0.937172	3	5.67397
vATTVISk	5	P05155	N-Term(TMT10); K8(TMT10)	0.0007711	35.65	0.0199302	2	1276.82	-1.77813	0	1.19209	5	4.73286	1.00914	5	3.76215	1.12053	5	4.45146	1.00721	5	5.1126	1.08994	5	9.98208	0.914029	5	4.40002	1.02481	5	7.30652	0.846471	5	17.7936	0.988746	5	3.15368
gGPLGYQk	1	B7ZMJ3	N-Term(TMT10); K8(TMT10)	0.002595	31.57	0.0622087	2	1277.76	0.718139	0	0.792525	1		0.985577	1		0.755051	1		0.780574	1		0.916139	1		1.1916	1		1.18035	1		1.19524	1		1.39678	1
nGITcQk	15	P00747	N-Term(TMT10); C5(Carbamidomethyl); K7(TMT10)	0.003043	33.45	0.0442819	2	1278.73	1.13564	0	1.3284	15	3.97979	0.801732	15	8.65969	0.916176	15	4.01748	1.00743	15	2.14151	1.13556	15	7.64382	0.802654	15	4.88607	0.926723	15	4.59441	1.1169	15	6.48279	1.05501	15	3.72373
fSVLGSGLNR	1	A2MYC8	N-Term(TMT10)	0.0001192	30.43	0.094015	2	1278.74	0.811165	0	1.26114	1		1.2388	1		1.33612	1		0.92798	1		2.20374	1		0.426243	1		0.581482	1		0.795725	1		0.333116	1
tEALTSAk	38	P06396;B7Z9A0;B7Z992	N-Term(TMT10); K8(TMT10)	0.0002695	51.74	0.000574761	2	1278.77	0.795011	0
tSADGNEk	1	P61981	N-Term(TMT10); K8(TMT10)	0.003352	26.04	0.162771	2	1279.69	-1.77693	0	0.552637	1		0.932168	1		0.994097	1		1.0533	1		0.871061	1		1.24278	1		1.08344	1		0.960132	1		1.46615	1
gGNEESTk	1	P00441	N-Term(TMT10); K8(TMT10)	0.0006797	38.62	0.00908242	2	1279.69	2.32486	0	0.547004	1		0.994787	1		1.03054	1		1.13711	1		0.862075	1		1.1838	1		0.984672	1		1.02721	1		1.28989	1
fSSHGck	10	P10643;B2R6W1	N-Term(TMT10); C6(Carbamidomethyl); K7(TMT10)	0.002022	33.22	0.0346842	2	1280.68	0.180642	0
eAFAAVSk	15	Q96IY4	N-Term(TMT10); K8(TMT10)	0.0001856	50.01	0.000666464	2	1280.76	0.299134	0	1.28259	15	9.02466	0.967319	15	3.07671	1.0079	15	4.39213	0.941035	15	5.64007	0.817003	15	15.3051	0.94269	15	7.16976	1.11668	15	10.9625	0.966657	15	6.59138	1.08537	15	5.85554
gLQDEDGYR	31	P0C0L4;P0C0L5;A0A0G2JPR0	N-Term(TMT10)	0.0001612	52.66	0.000136042	2	1281.63	1.57359	0
aGVLFGMSDR	2	P09172	N-Term(TMT10)	1.639e-05	37.92	0.0069821	2	1281.68	1.10801	0	1.10546	2	17.5894	0.972126	2	5.38985	0.986546	2	2.41912	1.1015	2	3.77094	0.818046	2	16.5556	0.853827	2	2.35089	0.981417	2	1.34211	1.30039	2	9.14341	0.824239	2	10.689
sHALQLNNR	24	P0C0L4;P0C0L5;A0A0G2JPR0	N-Term(TMT10)	0.000495	42.01	0.00426176	2	1281.72	0.990215	0
sTVELFk	30	P27169;Q15166	N-Term(TMT10); K7(TMT10)	0.001056	39.68	0.00372457	2	1281.78	0.581278	0
vDFTLSSER	37	P0C0L4;P0C0L5;A0A0G2JPR0	N-Term(TMT10)	0.0006188	32.66	0.0306231	2	1282.68	0.59933	0
vSMMQTk	7	P05546	N-Term(TMT10); K7(TMT10)	0.004905	26.67	0.136486	2	1282.73	2.4592	0	1.05553	7	5.00685	0.912845	7	6.09607	1.04845	7	3.23293	0.950404	7	8.11548	0.942905	7	7.19273	0.900555	7	13.2667	1.09086	7	5.76501	1.16818	7	3.60131	1.11892	7	7.58315
aAVHLEGk	6	A0A024QZN4;B4E3Q9	N-Term(TMT10); K8(TMT10)	0.0003476	39.24	0.00482453	2	1282.79	-1.24303	0
gLPAPIEk	5	Q6MZU6	N-Term(TMT10); K8(TMT10)	0.007745	37.43	0.00424686	2	1282.82	2.55279	0	1.51795	5	2.54549	1.09346	5	4.68783	1.38065	5	6.60759	1.24512	5	1.19167	1.16047	5	3.28763	0.576925	5	8.87079	0.674338	5	7.15584	0.68544	5	12.506	0.651866	5	7.18228
iAHGHYk	22	B4E1D8;P04003	N-Term(TMT10); K7(TMT10)	0.003433	31.26	0.035987	2	1283.76	0.778985	0
tLVVHEk	6	P00441	N-Term(TMT10); K7(TMT10)	0.007624	21.32	0.315085	2	1283.81	-0.769931	0	0.701605	6	7.07372	1.04604	6	6.4659	1.02695	6	5.61421	1.1138	6	2.34257	0.845059	6	8.46953	1.12601	6	4.51913	0.894819	6	12.2141	0.935793	6	2.88498	1.34132	6	1.99443
mGSSTSEk	24	P13671;A8K8Z4	N-Term(TMT10); K8(TMT10)	0.000312	43.93	0.00162235	2	1284.69	0.224302	0
lVPVLSAk	2	P37837	N-Term(TMT10); K8(TMT10)	0.0009077	34.66	0.00314621	2	1284.87	1.38681	0	0.703276	2	14.0875	0.979702	2	10.6612	0.969169	2	0.726544	1.0451	2	2.40903	0.981918	2	9.18677	1.05778	2	0.281739	1.00893	2	2.56725	1.0918	2	14.1131	1.23242	2	10.4415
mVcAGYk	8	P03952	N-Term(TMT10); C3(Carbamidomethyl); K7(TMT10)	0.007417	30.6	0.0418498	2	1286.7	2.15213	0	0.88426	8	10.2905	1.0129	8	3.86918	1.05446	8	2.58716	1.11834	8	12.0705	0.535218	8	24.335	1.05515	8	3.38413	0.948046	8	11.0275	1.11192	8	5.35812	1.24985	8	7.9599
sYYWIGIR	1	B4DQA0	N-Term(TMT10)	0.0035	21.81	0.306845	2	1286.71	-0.0739214	0	1.15205	1		1.05766	1		1.06847	1		0.998051	1		0.781221	1		1.04251	1		1.30521	1		1.15058	1		0.485061	1
nLGTALAELR	8	Q9Y490	N-Term(TMT10)	1.043e-06	62.96	3.17152e-05	2	1286.76	0.635893	0	0.660616	8	17.2651	1.04974	8	4.79352	0.985918	8	6.07275	1.03867	8	4.95672	0.816899	8	9.89896	1.13957	8	3.86219	0.979845	8	7.64419	1.02744	8	4.64261	1.48161	8	8.24282
lGNNPVSk	24	C0JYY2	N-Term(TMT10); K8(TMT10)	0.0008505	45.1	0.00152661	2	1286.78	0.439682	0	1.17392	24	8.66666	0.866124	24	8.50335	0.893475	24	10.4844	1.08462	24	8.42893	0.943347	24	11.3773	1.09993	24	5.09927	1.02758	24	6.89085	0.976383	24	7.74663	0.920559	24	5.71127
gLVGEIIk	6	J3KPD9	N-Term(TMT10); K8(TMT10)	0.0002525	50.04	0.000334901	2	1286.85	1.6522	0	0.693142	6	25.9716	0.986554	6	5.41228	0.952324	6	3.26154	1.08541	6	0.381422	0.839658	6	3.16484	1.17198	6	2.1334	0.968797	6	8.62671	1.09689	6	1.33708	1.27726	6	13.688
vQGVEFSHR	21	C0JYY2	N-Term(TMT10)	0.0002797	46.95	0.00102634	3	1287.7	0.47784	0	1.01208	21	20.7329	0.764871	21	21.1872	0.808777	21	12.5073	1.19366	21	13.781	2.21794	21	90.3816	0.891054	21	17.9619	0.823739	21	24.838	0.608496	21	39.8293	0.827676	21	38.0527
vFEHIGk	4	P04040	N-Term(TMT10); K7(TMT10)	0.0072	24.83	0.213096	2	1287.78	0.43746	0	0.908652	4	12.0252	0.868786	4	7.0425	1.14731	4	9.11208	1.14102	4	1.039	0.985572	4	9.31244	0.941359	4	1.24361	0.968157	4	7.11969	0.994302	4	4.56427	1.04821	4	13.572
sLAPTAAAk	53	A2RTY6	N-Term(TMT10); K9(TMT10)	0.0002561	54.14	0.000321296	2	1287.81	1.2736	0	1.1104	53	5.27987	0.9157	53	8.04194	0.953112	53	9.86067	1.03094	53	6.39636	0.861718	53	6.43564	0.944825	53	7.40783	1.14738	53	7.44921	1.01729	53	6.80817	1.11403	53	11.3013
iSIGNVVk	2	Q9Y490	N-Term(TMT10); K8(TMT10)	0.001924	36.64	0.0183171	2	1287.84	0.228545	0	0.589012	2	20.1099	0.987355	2	1.56175	0.9604	2	9.73822	1.01534	2	8.34931	0.781978	2	1.52077	1.11889	2	3.50983	0.862631	2	0.5745	1.32352	2	12.3864	1.37123	2	9.28105
aFSSYQk	18	P43652	N-Term(TMT10); K7(TMT10)	0.005291	35.86	0.0184965	2	1288.73	1.21185	0	1.10924	18	6.2077	0.856613	18	6.43284	0.969363	18	10.3942	0.842111	18	6.92617	0.814615	18	5.96377	0.928216	18	8.74477	1.153	18	5.15707	1.28411	18	4.72418	1.12441	18	4.21553
sVTcHVk	27	Q96K68;Q8NCL6;Q6MZW0;Q6ZVX0;Q7Z379;Q9NPP6;Q6P089;Q6ZW64;Q6N041;P0DOX2	N-Term(TMT10); C4(Carbamidomethyl); K7(TMT10)	0.002184	39.32	0.00861336	2	1288.74	-0.0875232	0
vQTAHFk	6	P07357	N-Term(TMT10); K7(TMT10)	0.004313	29.86	0.0850479	2	1288.78	1.57316	0	1.05998	6	7.88866	0.938369	6	8.21196	1.03832	6	7.64444	0.964366	6	5.73982	0.844078	6	3.56628	0.883026	6	9.61429	1.27598	6	3.71595	0.937842	6	7.64628	1.19984	6	7.07154
gLPSSIEk	5	P01861	N-Term(TMT10); K8(TMT10)	0.0002794	45.53	0.00276399	2	1288.79	1.17697	0	1.01035	5	4.21057	0.753167	5	8.30024	1.04855	5	2.61648	0.994075	5	3.51101	1.26617	5	1.20386	1.12585	5	3.00531	1.17941	5	4.55648	0.842634	5	5.54911	0.980928	5	7.56855
eETGQVLER	2	B3KXZ9	N-Term(TMT10)	0.003514	29.8	0.058901	2	1289.69	0.248002	0	0.985702	2	19.4283	0.91221	2	1.60084	0.848306	2	1.02517	0.971601	2	14.8203	0.898552	2	4.23322	1.11736	2	15.4104	1.22162	2	6.90527	1.02319	2	11.8668	1.13624	2	5.9589
rPPGFSPFR	8	B4E1C2;B4DPP8	N-Term(TMT10)	0.0008889	39.2	0.00813933	3	1289.73	-0.876059	0
lAEYHAk	15	P02647	N-Term(TMT10); K7(TMT10)	0.003655	36.64	0.0188157	2	1289.76	0.624565	0	0.568685	15	13.311	0.544144	15	12.9782	0.549959	15	13.395	1.37423	15	4.14201	4.2823	15	10.012	0.382199	15	31.0167	0.554771	15	8.59463	0.280198	15	28.5302	0.290283	15	61.8714
sLVGLGGTk	2	P35908	N-Term(TMT10); K9(TMT10)	0.0003158	27.57	0.130101	2	1289.82	-1.11381	0	0.909327	2	8.76648	0.891186	2	6.43361	1.06114	2	1.08254	0.81804	2	2.28803	0.866057	2	2.02887	1.11524	2	9.37553	1.35121	2	0.673736	1.32299	2	0.848125	0.822498	2	1.27592
dFHINLFR	8	A0A1U9X8W4	N-Term(TMT10)	0.006617	20.43	0.625408	2	1290.72	1.00971	0	1.1635	8	5.68272	1.06961	8	15.8657	1.0617	7	16.7209	0.957373	8	8.58522	0.832665	8	8.18393	0.849272	8	9.58764	1.16582	7	17.0193	1.05618	8	12.5557	0.926264	8	13.1404
vSLATVDk	5	P49908	N-Term(TMT10); K8(TMT10)	0.0002684	43.5	0.00261757	2	1290.8	0.872059	0	1.23857	5	5.53803	0.993074	5	6.06986	1.12528	5	10.8765	0.928779	5	3.89239	1.11781	5	17.5146	0.917665	5	3.17044	1.09737	5	3.13666	0.888284	5	5.46202	0.860386	5	6.6694
aLTDMPQMR	18	P02671	N-Term(TMT10)	0.0003909	37.5	0.00885583	2	1291.67	0.966923	0	1.20778	18	8.62046	0.98883	18	6.08912	1.23475	18	9.17781	0.940241	18	3.5677	1.27902	18	8.10564	0.766013	18	8.08676	1.09935	18	6.87328	0.911363	18	4.14966	0.796386	18	12.002
cFEPQLLR	4	P00748;A0A0R7FJH5	N-Term(TMT10); C1(Carbamidomethyl)	0.001143	32.84	0.0337477	2	1291.7	0.561778	0
fQDLVDAVR	4	P07996;A0A024R9Q1	N-Term(TMT10)	9.163e-05	47.78	0.00125627	2	1291.72	0.69983	0
vGELcAGk	3	A0A024QZN4;B4E3Q9	N-Term(TMT10); C5(Carbamidomethyl); K8(TMT10)	0.001706	28.12	0.143378	2	1291.74	-0.414337	0
lLSLGAGEFR	2	Q15430	N-Term(TMT10)	1.207e-05	56.27	0.000200995	2	1291.76	0.595211	0	1.1223	2	5.42198	0.749487	2	1.60812	0.99655	2	3.45223	0.361186	2	26.2219	0.718455	2	8.28989	1.14656	2	6.46716	1.89749	2	3.75168	1.62869	2	8.18676	0.773163	2	4.80748
sALVLQYLR	3	F2RM37	N-Term(TMT10)	2.955e-05	40.41	0.00746584	2	1291.79	-0.336649	0	1.2064	3	8.98044	0.998402	3	4.67978	1.08987	3	5.06374	0.900944	3	0.322203	1.04226	3	18.7813	0.855718	3	0.0911333	0.982942	3	0.172265	1.04765	3	3.40107	0.884568	3	3.41849
hSLVLHk	3	P12259	N-Term(TMT10); K7(TMT10)	0.004337	32.71	0.0339963	2	1291.83	1.35043	0	1.16765	3	2.37497	0.904344	3	3.62753	1.0561	3	2.66075	0.992854	3	9.71366	0.866288	3	3.46054	0.980884	3	1.93294	1.3423	3	17.7974	0.776217	3	0.54898	1.08689	3	5.30535
iDVHLVPDR	33	P08603;A8K5T0	N-Term(TMT10)	0.0005234	47.8	0.00148367	3	1292.75	0.819844	0
lSPVYAGk	2	P04275;L8E853	N-Term(TMT10); K8(TMT10)	0.001295	37.39	0.0158132	2	1292.8	1.15154	0
gYGFYTk	4	Q53HT9	N-Term(TMT10); K7(TMT10)	0.006962	26.32	0.19006	2	1293.72	0.138827	0	1.25498	4	3.93389	0.964229	4	3.04246	1.00417	4	3.62092	0.950835	4	0.196969	0.794824	4	7.54162	0.952869	4	5.66263	1.29818	4	2.62746	1.02272	4	3.87004	0.901613	4	12.6769
fVVTDGGITR	2	P54289	N-Term(TMT10)	0.0005542	30.7	0.0684315	2	1293.74	0.301997	0	1.03104	2	9.58995	0.994285	2	18.775	0.931153	2	2.64272	1.06023	2	7.08428	1.14014	2	16.031	1.04272	2	18.1743	1.02065	2	17.4333	0.924653	2	17.9985	0.870536	2	8.65001
vSVSQTSk	18	F2RM37	N-Term(TMT10); K8(TMT10)	0.0001583	49.4	0.000874893	2	1293.77	-3.00819	0	1.1566	18	4.57105	0.920913	18	5.77104	1.05369	18	4.63679	1.01297	18	6.10001	0.856605	18	6.32366	0.961875	18	7.21013	1.07696	18	5.74977	0.917327	18	7.66638	1.16693	18	9.55959
vVSGFSLk	1	P03951	N-Term(TMT10); K8(TMT10)	0.000755	27.71	0.066418	2	1294.81	0.557055	0	1.0841	1		0.939321	1		0.98598	1		0.957479	1		0.890527	1		0.838361	1		1.03957	1		1.20282	1		1.19356	1
dFNEEcPR	3	Q13418	N-Term(TMT10); C6(Carbamidomethyl)	0.004719	17.93	0.124825	2	1295.59	-0.961176	0	0.642402	3	11.5949	1.12085	3	15.5461	0.919641	3	4.33545	1.00993	3	5.14442	1.134	3	33.7056	1.01097	3	7.87199	0.917825	3	11.0868	1.05853	3	0.331216	1.19082	3	10.5419
tSQcTLk	30	C0JYY2	N-Term(TMT10); C4(Carbamidomethyl); K7(TMT10)	0.001592	38.56	0.0105253	2	1295.74	2.1175	0	1.15157	30	6.96647	0.760639	30	4.79038	0.946365	30	5.19688	1.09728	30	4.03016	0.678524	30	9.13511	1.0881	30	6.90351	1.16666	30	6.17255	1.19579	30	7.48741	0.940242	30	6.09636
axSFLGEk	38	Q6U2L6;P0C0L5;Q9UNU2	N-Term(TMT10); X2(S); K8(TMT10)	0.007497	43.56	0.00275567	3	1296.75	-3.69711	0
eSTLHLVLR	3	F5H265	N-Term(TMT10)	0.003151	32.23	0.0337803	3	1296.78	-0.201947	0	0.949021	3	5.64262	1.01522	3	15.2677	1.07272	3	16.686	1.04751	3	3.75088	1.0739	3	0.937976	0.889172	3	30.6527	1.04921	3	17.0523	0.936466	3	9.56725	1.03202	3	14.0795
fQScGIk	3	P26927;B7Z538	N-Term(TMT10); C4(Carbamidomethyl); K7(TMT10)	0.00483	33.71	0.0254508	2	1297.73	0.40324	0
tTSGIHPk	8	P02775	N-Term(TMT10); K8(TMT10)	0.003109	37.63	0.00959566	2	1298.78	-1.15448	0	0.537018	8	44.4436	1.17606	8	14.9065	0.895827	8	7.42739	1.15768	8	12.2508	0.972708	8	11.6447	1.25362	8	7.40054	0.816732	8	5.45292	0.449293	8	22.5421	1.90947	8	9.09325
lSPEELLLR	3	P13796;B4DPW9	N-Term(TMT10)	0.004872	42.78	0.00300257	2	1298.79	-0.218592	0
vTVLGQPk	11	Q6PIK1;Q5FWF9;Q6GMW4	N-Term(TMT10); K8(TMT10)	0.005869	30.55	0.026079	2	1299.84	0.695994	0
sSSISSFk	3	P13796	N-Term(TMT10); K8(TMT10)	0.0003637	33.15	0.0328753	2	1300.75	0.433098	0	1.10881	3	1.29604	0.936428	3	5.14258	0.972559	3	5.49642	1.00782	3	0.161433	1.06475	3	16.4237	0.924837	3	5.76469	1.1245	3	1.93957	0.890355	3	11.6482	1.09675	3	5.66549
yYLQGAk	21	B2RMS9;B7ZKJ8;B7Z8Q7	N-Term(TMT10); K7(TMT10)	0.004451	32.42	0.0398093	2	1300.77	0.541383	0
gPGGVWAAk	5	B2R5G8	N-Term(TMT10); K9(TMT10)	0.0001048	36.29	0.0152491	2	1300.78	0.97252	0	1.11886	5	5.66246	0.795874	5	3.8456	1.10201	5	8.15115	1.18003	5	2.07955	1.63573	5	10.2638	0.836718	5	11.7885	0.795442	5	5.19243	0.795563	5	12.376	0.748662	5	13.6872
vVLVAVDk	5	P01024	N-Term(TMT10); K8(TMT10)	0.0009668	46.66	0.000685084	2	1300.86	-0.636933	0	1.23235	5	0.566614	1.02982	5	6.11462	1.11704	5	3.5521	0.961941	5	1.20081	0.933636	5	2.72081	0.825103	5	0.700999	0.918338	5	4.03715	1.08319	5	6.07049	1.05076	5	6.69258
eLLETVVNR	8	A5YAK2;K7ER74	N-Term(TMT10)	0.000691	42.64	0.00335686	2	1301.76	-0.141753	0
hFQNLGk	24	P43652	N-Term(TMT10); K7(TMT10)	0.006961	28.93	0.0781062	2	1301.77	0.705253	0	1.08176	24	10.5449	0.849249	24	5.33925	0.953272	24	10.1377	0.901267	24	11.929	0.825271	24	10.5856	0.952687	24	7.74954	1.12411	24	12.6298	1.25555	24	12.0689	1.11067	24	7.08406
hGLYNLk	1	P18065	N-Term(TMT10); K7(TMT10)	0.00202	35.48	0.0216035	3	1302.79	0.714536	0	1.30777	1		1.06009	1		1.0151	1		0.965463	1		0.867814	1		1.04442	1		1.40035	1		0.694108	1		0.88181	1
iQNTLQk	7	P03951	N-Term(TMT10); K7(TMT10)	0.00442	33.19	0.0349246	2	1302.82	1.05945	0	1.05421	7	6.16919	1.00499	7	8.61106	0.991762	7	8.13521	0.942944	7	2.78118	1.06793	7	2.81463	0.977974	7	2.38497	1.04026	7	6.85537	1.03994	7	3.0225	1.08475	7	9.27795
eGGQTAPASTR	9	P06396;B7Z9A0;B7Z992	N-Term(TMT10)	1.202e-06	65.79	9.80715e-06	2	1303.68	-0.33295	0
fAHNVVTMR	5	Q06033	N-Term(TMT10)	0.0002456	33.55	0.0320139	2	1303.72	2.05048	0	1.0199	5	5.54059	0.926304	5	2.43826	1.13213	5	11.774	0.926466	5	4.1239	0.993547	5	10.4399	0.95528	5	9.52669	1.10885	5	15.6849	1.00285	5	9.28263	1.08626	5	10.659
qDSQLQk	32	P25311	N-Term(TMT10); K7(TMT10)	0.00634	39.56	0.0120069	2	1304.76	0.770373	0	1.18047	32	6.83993	0.995714	32	4.73015	1.04434	32	5.89538	0.945681	32	3.85098	0.914826	32	6.62243	0.981805	32	5.90519	1.16317	32	6.30572	0.864119	32	7.03565	1.13786	32	11.2358
gNTEGLQk	35	P06727	N-Term(TMT10); K8(TMT10)	0.0002669	51.07	0.000762478	2	1304.76	-0.921333	0	1.21654	35	9.10038	0.941761	35	5.85848	1.06528	35	7.84857	0.829375	35	5.35863	0.908177	35	15.2201	1.01958	35	6.49313	1.13226	35	4.59258	1.02848	35	7.2692	1.02048	35	6.85243
dFTFDLYR	5	P05154	N-Term(TMT10)	0.002516	26.16	0.0820729	2	1305.67	-0.601673	0	1.21882	5	1.34996	1.10468	5	5.57373	1.13614	5	1.8056	0.315425	5	26.6175	1.04817	5	3.01203	1.09015	5	2.29609	1.3131	5	4.87963	1.19438	5	2.87594	1.08124	5	4.3187
gNLcVNLMR	2	D6R934	N-Term(TMT10); C4(Carbamidomethyl)	0.0009852	48.89	0.000718564	3	1305.7	-0.119723	0	1.1613	2	0.835298	1.09603	2	12.7244	1.0733	2	3.47238	1.00352	2	3.76171	0.890113	2	5.07228	0.993981	2	7.69199	0.934052	2	10.3511	1.17641	2	5.68238	0.649607	2	1.324
gLEWVGFIR	1	A0A0A0MS15	N-Term(TMT10)	5.392e-05	41.78	0.00606329	2	1305.75	2.44848	0	1.03116	1		1.30547	1		2.56193	1		1.15768	1		2.66275	1		0.160094	1		0.24285	1		0.0933578	1
cNLLAEk	47	P02765	N-Term(TMT10); C1(Carbamidomethyl); K7(TMT10)	0.006403	39.42	0.0106288	2	1305.76	-0.0474326	0	1.09752	47	7.21584	1.12828	47	4.67886	0.924949	47	6.8137	0.917826	47	5.04362	0.827049	47	7.24463	1.05899	47	8.61053	1.20229	47	5.27982	0.914067	47	5.57005	1.08525	47	8.40444
gGQIMTLk	1	P04275;L8E853	N-Term(TMT10); K8(TMT10)	0.000425	36.58	0.0166488	2	1305.8	0.124949	0
tSQcILk	8	Q7Z7Q0	N-Term(TMT10); C4(Carbamidomethyl); K7(TMT10)	0.002816	35.75	0.0275385	2	1307.78	-0.152171	0	1.18088	8	3.55718	1.44805	8	2.54885	1.0654	8	11.4743	1.00464	8	2.39315	1.87127	8	3.02353	0.924873	8	2.05095	0.200912	8	32.3263	0.146861	5	50.3762	1.34232	8	7.49393
dVVLFEk	34	P00747	N-Term(TMT10); K7(TMT10)	0.007263	43.46	0.00359526	2	1307.8	0.262931	0	1.09652	34	8.64889	0.960216	34	6.40309	1.03862	33	9.86839	0.975286	34	3.45368	0.852352	34	10.3871	0.990551	34	6.37356	1.07485	34	6.89512	1.06915	34	6.43744	1.04711	33	6.80478
dVESDSAk	4	B4DNL5	N-Term(TMT10); K8(TMT10)	0.0002399	43.6	0.00273477	2	1308.71	0.267764	0	0.67696	4	8.12042	0.892198	4	1.93801	0.990212	4	6.1479	1.04837	4	3.44394	0.94306	4	5.05035	1.21373	4	3.75062	1.00687	4	3.88237	0.978261	4	6.38056	1.39785	4	12.3274
lNELSFk	7	C0JYY2	N-Term(TMT10); K7(TMT10)	0.004571	35.01	0.0197977	2	1308.79	1.10159	0	1.26263	7	2.22468	0.686736	7	6.02462	0.866781	7	3.46564	1.24984	7	0.842298	0.8193	7	2.30853	1.15665	7	8.63599	0.925316	7	5.09831	1.19217	7	3.76488	0.785985	7	7.27289
vVFEQTk	3	V9HWK1	N-Term(TMT10); K7(TMT10)	0.005622	30	0.0607	2	1308.8	2.50062	0	0.718657	3	14.443	1.02838	3	7.39679	1.04124	3	10.0783	1.0755	3	0.597881	0.918383	3	0.446631	1.11519	3	2.51453	0.924317	3	0.742902	1.0234	3	10.6332	1.1542	3	0.129498
dPTPEQTHR	15	P08697	N-Term(TMT10)	0.001607	36.2	0.00911557	3	1309.67	0.396631	0	1.09993	15	10.2906	0.958253	15	10.2048	1.03661	13	14.5479	1.01381	15	7.67628	0.99284	14	9.15925	1.00263	15	25.2721	1.10101	15	7.9417	0.942001	15	15.573	0.967451	13	20.5513
gSTSHHLVSR	2	C0JYY2	N-Term(TMT10)	0.0001783	43.89	0.00220492	4	1309.72	-0.94377	0	1.24938	2	4.22867	0.830652	2	27.0917	0.983291	2	9.59916	0.998054	2	16.5509	1.04534	2	11.535	1.11572	2	12.0338	1.1299	2	11.7891	0.837237	2	2.46905	0.921475	2	26.4065
yQISVNk	30	P02675	N-Term(TMT10); K7(TMT10)	0.006077	32.8	0.031226	2	1309.79	-1.96773	0	1.28724	30	9.37392	0.957698	30	3.73223	1.34082	30	7.09382	0.981451	30	6.25383	1.29649	30	8.52177	0.708648	30	12.6977	1.09238	30	6.9881	0.791766	30	6.0623	0.782032	30	5.8164
qINSYVk	9	B2R9F2	N-Term(TMT10); K7(TMT10)	0.003583	35.56	0.0193607	2	1309.79	0.548629	0	1.15916	9	2.20024	1.0043	9	6.71085	0.963753	9	8.08893	1.07678	9	3.832	1.07745	9	7.16553	0.860753	9	2.64504	0.994084	9	4.67918	0.970394	9	7.40979	0.970942	9	4.84222
lHVAGNLk	9	C0JYY2	N-Term(TMT10); K8(TMT10)	0.0009388	36.3	0.0101974	3	1309.84	-0.395181	0	1.13966	9	9.86571	0.848923	9	7.42487	0.936357	9	12.5566	1.16324	9	6.43953	0.972017	9	13.5828	0.986773	9	8.32861	1.06001	9	5.81504	1.02401	9	5.58302	0.841775	9	5.57414
sASLHLPk	7	P01009	N-Term(TMT10); K8(TMT10)	0.003021	27.84	0.0734212	2	1310.82	-0.967583	0	0.606576	7	15.8848	0.510656	7	25.2479	0.541007	7	21.8524	0.805091	7	10.6713	3.95849	7	20.7404	0.557454	7	15.8987	0.926916	7	8.74582	0.508797	7	65.9798	0.697851	7	7.17525
mALEVYk	13	B4E1D8;P04003	N-Term(TMT10); K7(TMT10)	0.004914	39.16	0.0155192	2	1311.77	-2.04688	0
nLDENYcR	17	P00747	N-Term(TMT10); C7(Carbamidomethyl)	0.001398	33.14	0.00730359	2	1312.61	-0.421759	0	1.03624	17	4.91265	0.985456	17	7.74563	0.970101	17	4.78174	0.967041	17	5.06833	0.878185	17	10.7987	0.982027	17	7.30443	1.1273	17	4.66366	1.03005	17	5.74029	1.16293	17	7.46729
gYTQQLAFR	6	P01024	N-Term(TMT10)	7.946e-05	41.58	0.003701	2	1312.72	-0.198447	0	1.25909	6	4.75158	0.966334	6	1.6123	1.05616	6	5.52206	0.919057	6	5.47565	1.08655	6	4.51478	0.857352	6	4.23462	1.00781	6	1.69489	1.00806	6	4.79305	0.984582	6	5.21577
scGLHQLLR	15	P0C0L4;P0C0L5;B7Z1F8;A0A0G2JPR0	N-Term(TMT10); C2(Carbamidomethyl)	7.316e-06	59.52	6.61183e-05	3	1312.74	0.886921	0
lQGTLPVEAR	20	P01031	N-Term(TMT10)	8.6e-05	56.48	0.00013663	3	1312.78	0.0593347	0	1.19947	20	7.11414	0.965987	20	6.95648	1.13401	20	7.47047	0.958391	20	8.40329	0.937897	20	14.6478	0.976524	20	10.4293	1.13175	20	11.5697	0.919415	20	5.26569	0.963516	20	9.08692
lTPVLLAk	1	F8VX93	N-Term(TMT10); K8(TMT10)	0.001314	32.16	0.00729762	2	1312.9	0.296364	0	0.590585	1		1.00946	1		1.0262	1		1.21134	1		1.00517	1		1.13819	1		0.932126	1		1.00378	1		1.06883	1
vQGNDHSATR	27	B2RMS9;B7ZKJ8;B7Z544	N-Term(TMT10)	2.755e-05	51.79	0.000192043	3	1313.68	0.197422	0
tScLLFMGR	2	P05546	N-Term(TMT10); C3(Carbamidomethyl)	0.0003795	33.85	0.0127544	2	1313.69	0.507386	0	1.04843	2	7.1553	1.09698	2	2.09408	1.14582	2	4.75615	1.01401	2	8.70802	0.988308	2	2.07414	0.91091	2	4.25729	1.10496	2	6.09636	1.03223	2	3.12968	0.736443	2	17.4375
fQSVFTVTR	3	P02747	N-Term(TMT10)	8.414e-05	43.19	0.0028832	2	1313.74	0.712422	0	1.10654	3	2.71849	1.3323	3	5.84226	1.19745	3	0.181688	1.17241	3	0.80414	0.646409	3	36.9715	0.773501	3	1.48523	0.802596	3	0.951962	1.28386	3	0.714686	0.397847	3	11.1124
gQPLSPEk	32	P01871;Q86TT1	N-Term(TMT10); K8(TMT10)	0.004909	35.22	0.0145795	2	1313.78	1.1464	0
lTVLGQPk	8	Q6GMX4;Q96JD0;A0N5G3	N-Term(TMT10); K8(TMT10)	0.005918	33.51	0.0111191	2	1313.86	-0.166648	0
cIEGSYk	12	O75882;B4DZ36	N-Term(TMT10); C1(Carbamidomethyl); K7(TMT10)	0.007234	23.94	0.169329	3	1314.71	0.474838	0
lPFPIIDDR	2	P30041	N-Term(TMT10)	0.0007035	34.9	0.0215513	2	1314.76	0.128738	0	0.514465	2	4.0259	1.16347	2	0.194946	0.97536	2	4.02029	1.22021	2	7.13372	0.855013	2	1.60266	1.11543	2	0.968077	0.895339	2	3.89887	0.999203	2	10.202	1.22684	2	5.38436
iVQLIQDTR	4	P15169	N-Term(TMT10)	0.0006633	49.01	0.000802603	2	1314.8	0.7776	0	1.0908	4	6.51326	0.923253	4	3.9861	0.981332	4	10.6241	0.981253	4	6.67765	0.878887	4	3.16719	0.941895	4	9.4457	1.14645	4	10.7262	0.92803	4	6.93041	1.29201	4	2.64814
gLAGAVSELLR	3	Q9Y490	N-Term(TMT10)	7.389e-08	66.68	1.2844e-05	2	1314.8	0.948075	0	0.458572	3	50.028	1.08174	3	0.401159	1.01146	3	7.34012	1.13367	3	8.67931	0.757071	3	1.33843	1.13909	3	3.57553	0.875366	3	0.218326	0.948033	3	4.87323	1.67281	3	0.114906
aGAVNPTVk	3	P27487	N-Term(TMT10); K9(TMT10)	2.518e-05	50.16	0.000449626	2	1314.82	1.22025	0	0.912276	3	3.03334	1.0689	3	15.1518	0.752576	3	16.6803	0.918378	3	0.347319	1.05691	3	8.87997	1.0909	3	8.41306	0.919208	3	13.7361	1.11873	3	17.3613	1.20146	3	2.31799
eSLLPVAk	3	Q53QE9	N-Term(TMT10); K8(TMT10)	0.00238	35.66	0.0103904	2	1314.84	1.68176	0	0.805167	3	13.7259	1.06357	3	7.53999	1.12116	3	12.1699	1.05067	3	0.750291	1.22742	3	27.2648	0.996006	3	13.0195	0.873603	3	5.33713	0.887931	3	3.10917	1.16845	3	21.3876
tNNHIMk	9	P05546	N-Term(TMT10); K7(TMT10)	0.005923	33.89	0.0318081	2	1315.76	1.18141	0	1.0241	9	3.17929	1.0662	9	5.26395	1.12927	9	2.63743	0.956439	9	5.15296	0.918846	9	12.7126	0.918428	9	5.29081	1.07632	9	4.17443	0.946061	9	4.19012	1.10245	9	5.8575
lEIELLk	4	P19320	N-Term(TMT10); K7(TMT10)	0.005011	40.33	0.00668708	2	1315.86	-0.371286	0	1.3395	4	2.54023	0.950257	4	3.02886	0.849876	4	5.21666	0.926227	4	4.46382	0.861229	4	2.93711	1.00542	4	8.77843	1.35204	4	5.88504	1.04403	4	3.70781	0.829096	4	4.28202
qLVEIEk	28	P00739;P00738	N-Term(TMT10); K7(TMT10)	0.007447	36.51	0.0198453	2	1316.82	0.743145	0
aQVVSNLk	4	Q9Y490	N-Term(TMT10); K8(TMT10)	0.0002945	46.56	0.00192428	2	1316.83	-0.647007	0	0.623353	4	17.4346	1.02997	4	7.63872	1.00368	4	9.12536	1.02343	4	2.44852	0.796818	4	5.91265	1.11689	4	6.16099	0.931076	4	3.69143	1.06914	4	3.84937	1.45424	4	2.18419
wELcDIPR	26	P00747	N-Term(TMT10); C4(Carbamidomethyl)	0.003252	48.27	0.000636702	3	1317.68	-0.495205	0	1.05358	26	5.96452	0.967922	26	6.13877	0.980238	26	9.90732	0.991774	26	4.17034	0.883616	26	10.3367	0.98676	26	5.71841	1.07979	26	4.41515	1.05867	26	4.40044	1.12003	26	8.47025
aTWSGAVLAGR	24	P04217	N-Term(TMT10)	2.426e-06	54.58	0.000255505	2	1317.75	-0.359188	0	1.11023	24	4.72376	0.973827	24	4.57167	1.03199	24	9.51601	1.00637	24	3.84912	1.0059	24	10.5091	0.931927	24	5.05857	1.08953	24	10.4212	0.974706	24	11.0777	0.974301	24	9.31412
lSIQSSPk	5	B2R6V9	N-Term(TMT10); K8(TMT10)	0.000453	35.86	0.0244112	2	1317.82	1.85359	0	0.99733	5	7.11658	0.873582	5	9.94132	0.983712	5	0.660722	1.07608	5	2.60644	0.889437	5	4.10388	0.924704	5	7.5053	0.954447	5	5.51987	0.954374	5	7.98267	1.44154	5	41.1044
iSVAQGASk	5	Q9Y6R7	N-Term(TMT10); K9(TMT10)	5.145e-05	44.33	0.00310864	2	1318.81	2.66951	0	1.54097	5	1.80077	0.938555	5	3.84657	1.12322	5	3.57	0.871818	5	3.7857	0.85411	5	3.33388	0.964813	5	3.32163	1.19684	5	1.7863	0.812043	5	8.53674	0.933418	5	11.7677
lQPLDFk	29	P01008	N-Term(TMT10); K7(TMT10)	0.005603	31.84	0.0551531	3	1318.81	-0.0649222	0	1.09246	29	4.17712	0.917271	29	4.42425	0.946253	29	8.74359	1.04064	29	2.71238	0.874189	29	6.64043	0.997911	29	5.84757	1.15071	29	4.3809	0.992833	29	3.0034	1.11141	29	8.16663
qGSATVGLk	1	F5GX11	N-Term(TMT10); K9(TMT10)	8.009e-06	49.28	0.00099442	2	1318.81	1.92902	0	0.755487	1		1.00161	1		1.04905	1		1.05204	1		0.922017	1		1.1056	1		0.991429	1		1.14607	1		1.01543	1
vTMQNLNDR	7	P13645;P02533;P08779	N-Term(TMT10)	0.0001447	38.51	0.00744104	2	1319.69	-0.0439837	0
aEQAEADk	1	V9HW25;A0A024R5W6;K7ELP0	N-Term(TMT10); K8(TMT10)	0.0003776	42.39	0.00444399	2	1319.72	-0.566028	0
nDLISATk	48	A2RTY6	N-Term(TMT10); K8(TMT10)	0.001009	55.41	0.000256952	2	1319.79	0.631782	0	1.05914	48	9.88906	0.921621	48	7.78357	0.895181	48	7.76618	1.00996	48	5.40589	0.898131	48	12.3794	0.909519	48	8.22283	1.15306	48	7.97624	1.04611	48	8.61171	1.15628	48	7.54247
gGSADAAWk	4	Q9ULI3	N-Term(TMT10); K9(TMT10)	2.471e-05	47.19	0.00137223	2	1320.73	0.534471	0	1.11034	4	3.30911	0.889725	4	4.46936	0.899549	4	10.4794	0.989744	4	3.78313	0.897538	4	16.2411	1.05882	4	3.55969	1.14662	4	4.4384	1.06186	4	3.07531	0.979367	4	4.67279
aVEDEATk	5	Q9Y490	N-Term(TMT10); K8(TMT10)	0.0001516	47.74	0.00129229	2	1320.74	-0.0218317	0	0.676903	5	7.51987	1.0367	5	4.73817	0.940177	5	7.81948	1.06104	5	3.65453	0.816195	5	16.7782	1.24971	5	6.71162	0.905735	5	4.67838	1.04054	5	0.396901	1.36512	5	16.8612
mIDAATLk	17	D3DP16	N-Term(TMT10); K8(TMT10)	0.001074	47.58	0.00164195	2	1320.8	0.00369238	0	1.44152	17	5.6387	0.864211	17	6.4905	1.2576	17	3.52553	0.938259	17	5.95826	1.43351	17	5.90577	0.646283	17	3.66377	1.08837	17	8.66448	0.866702	17	8.10628	0.704498	17	7.93559
gLFIIDGk	4	B4DF70	N-Term(TMT10); K8(TMT10)	0.0008194	38.65	0.00924505	2	1320.83	0.427165	0	1.06618	4	2.70434	0.918023	4	6.19829	1.38312	4	5.46429	0.989499	4	3.15585	0.770672	4	2.94299	0.808929	4	3.22588	1.11718	4	5.96479	1.08814	4	4.14313	1.00671	4	13.447
vTSTLTIk	10	P01871;Q86TT1;P0DOX6	N-Term(TMT10); K8(TMT10)	0.0001845	36.08	0.0158813	2	1320.85	-0.398422	0
dTDSEEEIR	3	B2RDW0	N-Term(TMT10)	0.0002331	38.73	0.00196263	2	1322.63	1.01042	0	0.408298	3	14.1367	1.05316	3	4.91554	0.804314	3	2.77095	1.10823	3	2.64208	0.991509	3	3.35484	1.3186	3	2.92219	0.793569	3	0.802275	1.0707	3	0.560947	1.39579	3	1.1171
dSQEEEk	7	P06396;B7Z9A0;B7Z992	N-Term(TMT10); K7(TMT10)	0.006541	33.56	0.0272703	2	1322.68	0.625056	0
aLDFIASk	3	O43707;P12814	N-Term(TMT10); K8(TMT10)	0.005524	36.79	0.0144703	3	1322.81	1.16864	0
hLVALSPk	7	B2R9F2	N-Term(TMT10); K8(TMT10)	0.0002261	47.52	0.000520412	2	1322.86	2.44563	0	1.20418	7	3.8602	1.0086	7	2.04921	1.00966	7	5.8053	1.00669	7	9.8712	1.09671	7	1.57503	0.875862	7	8.00817	1.04743	7	2.53508	0.798019	7	19.888	1.21812	7	16.2132
aNSFLGEk	44	P0C0L4;Q6U2L6;A0A0G2JPR0	N-Term(TMT10); K8(TMT10)	5.894e-05	46.52	0.00202565	2	1323.77	0.0500716	0
lSSAMSAAk	1	P40925	N-Term(TMT10); K9(TMT10)	1.926e-05	39.9	0.00933243	2	1323.77	-0.935602	0	0.715748	1		1.00185	1		1.04617	1		1.08254	1		0.987296	1		1.10369	1		0.933875	1		0.957235	1		1.27035	1
fHPLHSk	7	A6XND1	N-Term(TMT10); K7(TMT10)	0.003985	34.93	0.0194748	3	1323.8	1.34543	0	1.19865	7	2.94314	0.91539	7	7.80528	0.984098	7	5.31877	1.02499	7	6.07555	0.974117	7	7.48621	0.969694	7	6.81297	1.0542	7	3.47813	0.827087	7	16.6467	1.18822	7	4.41624
fSGSLLGGk	2	S6C4R7	N-Term(TMT10); K9(TMT10)	6.239e-05	48.5	0.000858823	2	1323.8	0.593485	0	1.70062	2	11.6826	1.23392	2	3.81679	1.73987	2	4.47028	1.08683	2	1.51163	2.61678	2	8.97715	0.18947	2	46.1377	0.298776	2	40.4732	0.169332	2	85.6247	0.133781	1
lSVFGGGTk	1	A0A193CHR8	N-Term(TMT10); K9(TMT10)	0.0006642	26.18	0.133268	2	1323.81	1.97666	0	1.33107	1		0.820975	1		1.84284	1		0.692852	1		2.94875	1		0.493982	1		0.57778	1		0.38409	1		0.379134	1
axSFLGEk	11	Q6U2L6	N-Term(TMT10); X2(D); K8(TMT10)	0.0002406	49.78	0.000750575	2	1324.75	0.0415717	0	1.16342	11	5.67271	0.786671	11	6.72679	1.01443	11	8.4035	1.05961	11	4.72452	0.830036	11	16.0112	1.03746	11	6.09224	1.1726	11	8.37503	0.80163	11	4.84285	1.2699	11	13.1425
vTTHPLAk	5	Q99497	N-Term(TMT10); K8(TMT10)	0.003389	35.11	0.0148455	2	1324.83	-0.331237	0	0.79673	5	11.9133	0.86131	5	11.7039	0.855972	5	6.87251	1.08944	5	12.8818	1.14227	5	11.1374	0.985671	5	2.85046	0.998101	5	13.6183	0.916138	5	8.34053	1.4009	5	3.83425
aVLHIGEk	19	P05543	N-Term(TMT10); K8(TMT10)	0.0001544	46.77	0.00104347	2	1324.84	0.0297752	0	1.10746	19	5.95933	1.01749	19	4.77148	0.929535	19	17.663	0.92474	19	7.70013	0.913816	19	9.67282	1.01521	19	4.89799	1.16168	19	15.2379	1.01065	19	7.37017	1.12411	19	18.2776
aGGANYDAQTE	1	Q14019	N-Term(TMT10)	0.002068	16.05	0.302942	2	1325.62	-0.107378	0	0.865409	1		0.959409	1		0.672497	1		0.868588	1		1.06167	1		1.3126	1		1.04025	1		1.01296	1		1.34297	1
tTcWDGk	32	P08603;A8K5T0;B1AKG0	N-Term(TMT10); C3(Carbamidomethyl); K7(TMT10)	0.006746	27.71	0.0728565	2	1325.69	1.75036	0
aFVVDMMER	5	P04275;L8E853	N-Term(TMT10)	0.0003019	32.87	0.0198562	2	1326.67	-0.530225	0
vLPGVDALSNI	3	P00558	N-Term(TMT10)	0.001463	58.71	0.000101007	2	1326.78	0.210655	0	0.694115	2	15.8177	0.879659	3	23.899	0.852311	3	20.9984	1.0991	3	20.1365	1.05371	3	20.4149	1.01812	3	3.30238	1.12253	3	15.4313	1.15284	3	18.85	1.20761	3	11.9707
tLSPVLESPR	2	A0A140T8Z8	N-Term(TMT10)	0.0003686	49.57	0.000553695	2	1327.78	2.50833	0	1.07968	2	3.04482	0.931774	2	0.839245	0.994079	2	7.74912	1.04528	2	1.32242	0.928913	2	9.16382	0.979235	2	2.67934	1.04821	2	6.23445	1.05801	2	1.56829	1.01604	2	3.23778
dPNIVIAk	4	B3KQT9	N-Term(TMT10); K8(TMT10)	0.0009947	32.44	0.0256859	2	1327.83	-0.82495	0	0.683756	4	10.6135	0.920038	4	4.79107	0.978068	4	3.07023	1.04722	4	6.52298	0.916319	4	3.98576	1.12238	4	3.11749	1.01377	4	4.35083	1.09187	4	3.48138	1.24555	4	6.67365
lLELTGPk	61	P04217	N-Term(TMT10); K8(TMT10)	0.0001184	48.3	0.000440035	2	1328.86	0.818457	0	1.03235	61	6.0391	0.896429	61	7.07907	0.981503	60	7.82239	0.990807	61	6.56418	0.903941	61	6.7702	0.986621	61	7.12136	1.19069	60	9.78917	1.02006	60	4.56095	1.12455	61	6.96074
nGMLHGDk	21	D9IWP9	N-Term(TMT10); K8(TMT10)	0.0001996	46.35	0.00144605	2	1329.74	1.69576	0	1.48043	21	12.2142	0.823772	21	4.67005	0.870128	21	15.3059	0.950477	21	5.21764	1.2658	21	26.2115	0.823139	21	5.31903	0.990508	21	10.0092	0.885629	21	11.0966	1.02087	21	9.74471
lQAAGNAVk	7	Q9Y4G6;Q9Y490	N-Term(TMT10); K9(TMT10)	3.943e-06	61.71	3.53115e-05	2	1329.83	1.82216	0
qGALELIk	11	P01024	N-Term(TMT10); K8(TMT10)	0.004295	35.27	0.0195684	2	1329.85	-0.199951	0	1.21269	11	8.48009	0.959597	11	4.7939	1.08516	11	6.77008	0.91924	11	7.19591	1.08105	11	6.11973	0.839063	11	4.08276	0.979162	11	5.20911	1.00441	11	5.70093	1.05081	11	4.01314
vPTISINk	2	D3DPU2;B4DNA3	N-Term(TMT10); K8(TMT10)	0.00582	30.02	0.0658958	2	1329.85	-2.48725	0
dAWGPGAAk	3	G3V0E5	N-Term(TMT10); K9(TMT10)	0.001743	45.11	0.00193778	2	1330.75	1.82365	0	0.906016	3	4.52869	0.899199	3	1.25737	0.882024	3	0.519586	1.09047	3	4.03164	1.00526	3	12.2034	0.953841	3	5.71788	1.18922	3	8.21305	1.0294	3	5.24047	1.17497	3	3.42439
gNDIIAAAk	13	A0A024QZN4;B4E3Q9	N-Term(TMT10); K9(TMT10)	4.578e-05	59.1	0.000105311	2	1330.81	0.161316	0
nNVVSVNk	3	Q15582	N-Term(TMT10); K8(TMT10)	0.0007507	23.77	0.374005	2	1331.81	1.54301	0	1.33994	3	0.940874	0.941672	3	5.77077	0.936343	3	2.89243	0.94795	3	2.50507	0.928978	3	2.81752	0.8867	3	3.95858	1.06736	3	0.897919	1.09435	3	4.52031	0.886105	3	6.58405
gIWLEAGk	6	Q9Y490	N-Term(TMT10); K8(TMT10)	0.0001359	47.91	0.00143928	2	1331.81	-0.757199	0	0.598101	6	11.5285	1.02443	6	2.7597	0.991206	6	7.99735	1.03846	6	6.22988	0.85245	6	6.1256	1.10273	6	0.693568	0.95981	6	7.44098	1.04116	6	2.43041	1.49626	6	12.3301
eLAAQTIk	45	P19827;B7Z539	N-Term(TMT10); K8(TMT10)	0.003017	47.9	0.00157234	2	1331.83	-0.666909	0
iLEGFQPSGR	11	P80108	N-Term(TMT10)	0.0004748	36.03	0.0163895	3	1332.75	-0.865765	0	1.03562	11	4.30806	0.901442	11	9.01796	0.979227	11	10.9677	1.03052	11	4.36462	0.967147	11	8.95876	0.968762	11	6.93479	1.1121	11	6.01359	1.02557	11	9.55643	1.066	11	11.5506
nLVTMTTAPR	3	Q16853	N-Term(TMT10)	5.436e-05	43.77	0.00294671	2	1332.75	-2.17068	0	1.14299	3	3.22967	0.944706	3	10.1201	1.08683	3	23.7061	0.935253	3	12.2456	1.086	3	19.0096	0.971137	3	10.5018	1.05654	3	0.66117	1.00198	3	13.9221	0.938813	3	0.45992
dSAHGFLk	23	Q53H26;B4E1B2	N-Term(TMT10); K8(TMT10)	0.000322	34.71	0.0316936	2	1332.77	0.168495	0
vTGWGNLk	11	P00734	N-Term(TMT10); K8(TMT10)	0.0005825	37.71	0.0178922	2	1332.8	-0.75719	0	1.09297	11	7.79323	0.870751	11	5.71295	1.00661	11	5.02797	1.04081	11	8.7426	0.855783	11	5.86395	0.973449	11	4.85678	1.03194	11	6.51475	1.11284	11	6.24866	0.990603	11	3.89709
sLVNLGGSk	6	H6VRF8	N-Term(TMT10); K9(TMT10)	7.115e-06	50.14	0.000822068	2	1332.83	0.332993	0	0.999583	6	4.56854	1.0426	6	5.67105	1.09055	6	5.53655	0.863624	6	10.7406	0.871695	6	12.4972	1.09396	6	7.40164	1.16005	6	16.1896	1.01774	6	4.0842	0.983779	6	6.63897
vGTGGIVGSk	2	A2MYC8	N-Term(TMT10); K10(TMT10)	7.094e-07	52.62	0.00046469	2	1332.83	0.783428	0	1.73976	2	7.65371	1.18829	2	1.54133	1.24182	2	15.2223	0.823654	2	3.77072	2.09763	2	7.79911	0.508075	2	18.6093	0.577336	2	30.9419	0.59427	2	19.8448	0.384764	2	10.0414
iGFPWSEIR	2	E7EQR4;P26038	N-Term(TMT10)	0.000401	32.48	0.0459576	2	1333.75	1.45414	0
sGFSFGFk	6	B7Z550	N-Term(TMT10); K8(TMT10)	0.0007048	32.6	0.0467385	2	1334.75	0.340942	0	1.13991	6	4.15373	1.0364	6	1.73552	1.08227	6	8.26452	0.935342	6	3.36029	0.790311	6	17.0731	0.823758	6	2.82133	1.18665	6	7.3951	1.28143	6	7.07771	0.770171	6	4.57078
eTIEQEk	6	P62328	N-Term(TMT10); K7(TMT10)	0.007709	35.74	0.0216416	2	1334.76	0.241525	0	0.391788	6	39.3782	1.30927	6	4.62829	0.797779	6	11.954	1.32067	6	5.06379	0.647857	6	16.2642	0.536666	6	14.2717	0.591228	6	24.728	1.65591	6	10.9537	1.46845	6	8.24532
vGSAMVNAk	11	B2R6V9	N-Term(TMT10); K9(TMT10)	8.895e-06	57.15	0.000150058	2	1334.79	2.91405	0	0.968426	11	8.89705	0.913226	11	5.05695	1.04447	11	7.35924	1.18132	11	7.08851	0.933585	11	11.9663	0.957677	11	3.36106	0.957493	11	6.33615	1.05317	11	2.56671	1.07408	11	4.28757
gSEMVVAGk	39	B2RMS9;B7ZKJ8;B7Z8Q7;B7Z544	N-Term(TMT10); K9(TMT10)	9.474e-06	68.01	1.33695e-05	2	1335.77	-0.934683	0
lQDLYSIVR	1	H7C457	N-Term(TMT10)	6.191e-05	37.29	0.0169187	2	1335.78	0.799625	0	1.70113	1		0.862187	1		1.10657	1		0.807381	1		0.982597	1		0.92278	1		0.997834	1		0.935301	1		0.923868	1
dLQNFLk	4	P06702	N-Term(TMT10); K7(TMT10)	0.007812	36.2	0.0190827	2	1335.8	-0.409578	0	0.645858	4	13.8877	1.09295	4	4.34744	1.51523	4	2.57414	0.925172	4	5.03475	1.25579	4	3.16366	1.05129	4	4.47001	0.907769	4	5.10483	0.801458	4	2.36785	1.10699	4	4.1414
aSLAFLQk	2	A0A024RD39	N-Term(TMT10); K8(TMT10)	0.0006064	34.45	0.0300418	2	1335.84	-1.33314	0	1.37442	2	6.46427	0.824618	2	6.29012	1.09496	2	3.02032	1.20909	2	0.219407	0.942734	2	6.1146	0.844615	2	5.15	0.962213	2	7.76954	0.973258	2	3.71019	0.787931	2	7.86921
wGAGSIck	1	Q9BTY2	N-Term(TMT10); C7(Carbamidomethyl); K8(TMT10)	0.0001435	39.56	0.00852654	2	1336.75	0.357253	0	1.06546	1		0.936787	1		1.01017	1		0.853907	1		1.14842	1		0.997638	1		1.06278	1		1.0923	1		1.00697	1
hSHESQDLR	14	P04196;B2R8I2	N-Term(TMT10)	0.0002238	43.01	0.0014876	3	1337.68	-0.0039694	0
vTVSSASTk	3	Q6N095	N-Term(TMT10); K9(TMT10)	8.355e-06	59.56	0.00113789	2	1337.81	4.13557	0	1.23666	3	1.87138	1.14052	3	7.30537	1.90398	3	6.70564	1.05793	3	1.3648	2.73015	3	28.0273	0.274375	3	89.4379	0.356083	3	44.5758	0.243959	3	132.73	0.228252	3	105.969
fLDMLIk	2	C0JYY2	N-Term(TMT10); K7(TMT10)	0.006976	34.68	0.0226201	2	1337.83	1.24189	0	1.36068	2	1.69655	0.700455	2	9.40893	0.92636	2	7.30191	1.73992	2	0.938919	1.13608	2	1.78913	0.845167	2	2.70078	0.51526	2	3.78216	0.90528	2	2.42907	0.503034	2	8.03879
aFQYHSk	16	P00747	N-Term(TMT10); K7(TMT10)	0.00692	29.13	0.0965222	2	1338.76	1.14824	0	0.989439	16	5.21599	0.983345	16	8.65273	1.06383	16	7.11894	0.993494	16	5.22951	0.795969	16	10.8018	1.02085	16	4.34684	1.03138	16	10.5499	1.04271	16	3.73085	1.11247	16	9.16242
aEFAEVSk	24	P02768;F6KPG5	N-Term(TMT10); K8(TMT10)	0.0002113	47.89	0.00126793	2	1338.77	-0.1599	0
lIDVISMYR	2	C0JYY2;Q59HB3;E1B4S9	N-Term(TMT10)	0.003684	26.22	0.186966	2	1338.77	-0.103814	0
lDGSVDFk	45	A0A140VJJ6;D3DP16	N-Term(TMT10); K8(TMT10)	0.001095	35.53	0.0216781	2	1338.77	-0.524625	0
aWFLESk	2	A5YAK2	N-Term(TMT10); K7(TMT10)	0.004711	39	0.00953636	2	1338.78	1.76145	0	0.952771	2	5.15301	0.754468	2	3.86313	0.581608	2	15.8151	1.90466	2	0.732329	0.853255	2	0.151838	0.99818	2	14.4228	0.699927	2	27.0242	0.885139	2	4.60994	0.924887	2	10.1528
sTTPDITGYR	14	A0A024R462	N-Term(TMT10)	0.0008476	41.88	0.00255238	2	1339.71	3.9708	0	1.22301	14	4.28955	0.854862	14	10.7859	0.917851	14	10.5965	0.941716	14	3.35385	1.06153	14	6.08333	0.990412	14	5.54284	1.2773	14	5.92204	1.065	14	6.18529	0.817677	14	12.9303
vLLDGVQNPR	3	P01024	N-Term(TMT10)	0.004532	28.93	0.0863582	3	1339.79	-2.88412	0	1.15681	3	5.73679	0.942812	3	4.945	0.969162	3	12.775	1.05606	3	0.723934	1.01034	3	2.98184	0.991932	3	3.23794	1.04366	3	3.61171	0.940042	3	4.93716	1.06901	3	10.0892
sLYGLGGSk	2	B4DRR0	N-Term(TMT10); K9(TMT10)	4.92e-05	41.71	0.0041416	2	1339.8	-0.435938	0	1.24489	2	8.77291	0.942747	2	3.06141	1.2845	2	5.04304	1.08679	2	7.28532	0.875513	2	8.09602	0.967462	2	4.88055	1.33962	2	4.44378	0.827816	2	8.22168	0.580735	2	9.83514
qITASSFk	1	P12259	N-Term(TMT10); K8(TMT10)	0.0009915	33.71	0.0251103	2	1339.8	2.20627	0	1.155	1		0.812925	1		1.00108	1		0.889122	1		0.917794	1		0.890238	1		1.40241	1		1.03849	1		1.17858	1
wANQcNYR	7	P54108	N-Term(TMT10); C5(Carbamidomethyl)	0.001094	27.62	0.0230066	2	1340.64	0.833694	0	1.15988	7	7.30071	1.00086	7	8.91808	0.970438	7	6.51847	0.996079	7	2.26061	0.859601	7	8.32969	1.07541	7	7.91052	1.11217	7	4.4835	1.00422	7	4.06616	0.891226	7	7.29674
eSGPTTYk	15	P01871;Q86TT1;P0DOX6	N-Term(TMT10); K8(TMT10)	0.0003833	30.87	0.0541824	2	1340.75	2.21354	0
tASDFITk	25	P06396;B7Z9A0;B7Z992	N-Term(TMT10); K8(TMT10)	0.0006288	40.98	0.00476004	2	1340.78	1.19481	0
qAIQASHk	13	P13671;A8K8Z4	N-Term(TMT10); K8(TMT10)	5.979e-05	43.55	0.00217253	2	1340.81	0.831323	0
aGVAPLQVk	3	P21333	N-Term(TMT10); K9(TMT10)	9.175e-06	47.28	0.00049386	2	1340.87	4.71864	0	0.514213	3	7.04502	1.02315	3	1.53603	1.56211	3	12.1794	0.842932	3	1.72646	0.660085	3	2.82406	1.27965	3	6.99205	0.807716	3	3.02021	0.744779	3	13.3401	2.09832	3	1.53409
tFAHYATFR	5	O75636	N-Term(TMT10)	0.0002884	30.31	0.0366391	2	1342.71	1.31418	0	1.18206	5	3.12792	1.34094	5	13.3356	0.981025	5	2.29666	1.0303	5	1.0739	0.9344	5	6.18797	1.05566	5	12.6182	1.12564	5	4.24885	0.906406	5	11.4418	0.625671	5	37.5175
vGDTLNLNLR	64	P0C0L4;P0C0L5;A0A0G2JPR0	N-Term(TMT10)	0.0009517	49.54	0.000754866	3	1343.79	3.72832	0
hVFGQAVk	3	B4DMH3	N-Term(TMT10); K8(TMT10)	0.005222	38.41	0.00846522	2	1343.82	1.2558	0	0.54557	3	4.16761	0.934469	3	0.177794	1.20568	3	3.66378	1.12253	3	11.2645	0.999638	3	8.60122	1.07518	3	16.5515	0.780131	3	13.6982	0.948241	3	15.875	1.42563	3	7.33456
lTVLSQPk	5	Q8NEJ1;Q6GMV8;S6BGD6;Q6IN99;S6C4R7	N-Term(TMT10); K8(TMT10)	0.001617	34.02	0.0210027	2	1343.87	-0.663203	0
ycNLMMQR	2	P34096	N-Term(TMT10); C2(Carbamidomethyl)	0.001011	21.68	0.0713164	2	1344.64	-0.775136	0	1.21533	2	7.16842	0.936801	2	4.44758	1.20561	2	15.2044	0.947207	2	4.79747	1.12263	2	2.37493	0.87864	2	8.72874	1.07509	2	4.79403	0.978828	2	1.95553	0.804117	2	0.000651666
iSLPESLk	4	P01024	N-Term(TMT10); K8(TMT10)	0.004092	34.48	0.0269121	3	1344.85	0.0677895	0	1.22206	4	2.50524	1.0059	4	5.85222	1.06393	4	11.2015	0.941771	4	4.12948	0.998787	4	10.1668	0.882651	4	4.98773	0.914928	4	10.081	1.02374	4	12.3026	1.02574	4	12.8663
lLDSLPSDTR	28	P05155	N-Term(TMT10)	0.000412	48.33	0.000915141	2	1345.75	0.163363	0	1.16008	28	13.299	1.11427	28	9.26215	1.17405	28	10.548	0.632095	28	30.4588	1.21028	28	7.13499	0.971524	28	5.82205	1.17892	28	7.13195	0.949846	28	7.18444	1.00331	28	6.81838
gELFFFk	4	P08253	N-Term(TMT10); K7(TMT10)	0.001864	37.19	0.0139037	2	1345.79	-1.74979	0	1.20213	2	2.25381	0.941489	2	7.80033	1.02837	2	3.55402	0.924852	2	11.9505	0.788478	2	0.00128803	0.991479	2	8.48485	1.28485	2	4.331	1.15473	2	6.72264	0.802121	2	19.5615
aVRPGYPk	22	P04004	N-Term(TMT10); K8(TMT10)	0.006747	16.1	2.45471	3	1345.83	-2.01725	0	1.04535	22	8.1053	0.90888	22	7.96016	0.882791	22	4.7319	0.943545	22	10.8555	0.836579	22	13.5937	0.941393	22	7.49875	1.08389	22	7.90993	1.15839	22	12.9665	1.14628	22	10.3131
vINSVDIk	6	Q53GN4;O75083	N-Term(TMT10); K8(TMT10)	0.0005487	41.7	0.00595629	2	1345.84	-1.49486	0
gIQNDLTk	6	A8K2W3	N-Term(TMT10); K8(TMT10)	0.0004967	50.1	0.000964533	2	1346.8	-0.766983	0	0.383739	6	12.6012	0.918531	6	3.52532	0.891113	6	5.13743	1.17897	6	2.21001	0.855155	6	1.59069	1.2579	6	7.13319	0.983881	6	7.31139	1.09444	6	4.73139	1.48663	6	2.46544
aVLTIDEk	33	P01009	N-Term(TMT10); K8(TMT10)	0.0006813	45.08	0.00273356	2	1346.83	-0.0519203	0	0.39744	33	43.3862	0.350454	33	56.4503	0.35984	33	49.7563	0.704282	33	8.9108	5.50505	33	18.7234	0.341487	33	43.2038	0.880867	33	8.84302	0.266234	33	59.7939	0.602603	33	11.5375
eVPcASVk	13	P10643;B2R6W1	N-Term(TMT10); C4(Carbamidomethyl); K8(TMT10)	0.001922	35.93	0.023421	2	1347.77	0.353519	0
sLNEEAVk	58	P01023	N-Term(TMT10); K8(TMT10)	8.679e-05	49.87	0.00113755	2	1347.79	-0.774741	0	1.50281	58	13.1161	1.27647	58	12.2557	1.41677	58	9.34562	1.59304	58	15.8788	1.60432	58	11.9436	0.409581	58	41.1102	0.420087	57	62.3869	0.367879	48	65.2168	0.3978	46	36.4313
gNTAAQLSk	5	B4E3A8	N-Term(TMT10); K9(TMT10)	7.695e-06	63.97	3.87237e-05	2	1347.8	-1.40838	0	0.514349	5	3.95293	0.982507	5	6.10019	0.918125	5	3.11662	1.07971	5	0.282567	0.889936	5	1.02178	1.23685	5	6.14851	0.913038	5	3.76185	0.991437	5	4.25337	1.52749	5	1.83874
dALSASVVk	4	Q13103	N-Term(TMT10); K9(TMT10)	3.664e-05	47.18	0.0016922	2	1347.83	1.2081	0	0.607382	4	9.99743	0.613398	4	4.0329	0.545485	4	5.05613	0.592849	4	2.80232	0.682604	4	9.75037	1.63841	4	3.53012	2.00663	4	0.807444	1.20073	4	5.07711	1.55674	4	5.56882
vVSSIEQk	16	P63104	N-Term(TMT10); K8(TMT10)	0.0003513	42.44	0.00504025	2	1347.83	0.672114	0	0.58369	16	21.4628	0.946285	16	6.42569	0.872817	16	7.69522	1.09074	16	7.53808	0.980306	16	9.71789	1.1822	16	7.24365	1.00357	16	5.02819	1.03303	16	2.85335	1.35984	16	12.3987
lFAYPDTHR	2	P04040	N-Term(TMT10)	0.003324	34.93	0.0205192	3	1348.72	0.226794	0	1.11576	2	20.7774	0.830123	2	0.705074	1.30488	2	7.77511	1.10379	2	2.13243	1.00116	2	3.94915	0.943165	2	8.77319	0.888879	2	11.0666	0.800394	2	13.9066	1.17788	2	6.96087
iVGGQEck	13	P00742	N-Term(TMT10); C7(Carbamidomethyl); K8(TMT10)	0.00254	37.39	0.0154666	3	1348.76	-1.15801	0	1.13377	13	5.4141	0.92417	13	8.49499	0.98732	13	3.60724	0.988172	13	5.43314	0.948831	13	6.81099	0.983532	13	4.05435	0.999072	13	5.7915	0.971109	13	1.0701	1.21509	13	4.07377
eLPSFLGk	5	P26447	N-Term(TMT10); K8(TMT10)	0.0004607	40.53	0.00718271	2	1348.83	0.93391	0	0.53791	5	9.23034	0.986578	5	2.05461	0.962467	5	0.571319	1.11502	5	1.78209	0.857476	5	3.24552	1.22595	5	2.76031	0.993759	5	6.79761	1.0196	5	2.91412	1.40801	5	1.45827
iSVTQGASk	2	Q9Y6R7	N-Term(TMT10); K9(TMT10)	0.0001096	41.49	0.00552761	2	1348.83	4.8267	0	1.45461	2	3.63292	0.919212	2	3.0298	1.03978	2	7.3793	1.03738	2	3.58474	1.09513	2	6.45453	0.792452	2	4.98566	1.08485	2	9.42793	0.992809	2	2.49695	0.659279	2	21.0663
tLVLLmGk	1	P07737	N-Term(TMT10); M6(Oxidation); K8(TMT10)	0.00465	33.56	0.0342752	2	1348.87	1.40856	0	0.769693	1		1.0021	1		0.96362	1		1.0862	1		0.929698	1		1.07981	1		0.883384	1		1.12727	1		1.17654	1
xGVPIcGAcR	2	P48059	X1(M); N-Term(TMT10); C6(Carbamidomethyl); C9(Carbamidomethyl)	0.0005045	19.18	0.393143	2	1349.67	1.15474	0	0.927093	1		0.961236	1		1.10279	1		1.07123	1		0.935789	1		0.994243	1		1.02262	1		1.00816	1		1.08232	1
vFcQPWQR	1	G3XAM2;Q6LAM1	N-Term(TMT10); C3(Carbamidomethyl)	0.006818	15.86	1.34768	2	1349.7	2.54624	0
lVWEEAMSR	14	Q16610	N-Term(TMT10)	5.896e-05	41.85	0.00348119	2	1349.71	0.535533	0	1.07848	14	5.27517	0.984132	14	7.25169	0.962402	14	4.7012	0.982761	14	4.05196	0.967222	14	9.75912	1.05469	14	7.81924	1.09718	14	1.75193	1.06352	14	6.99705	0.894061	14	7.57022
gLYDVVSVLR	2	O75144	N-Term(TMT10)	4.985e-06	43.22	0.00441652	2	1349.8	-0.229402	0	1.14496	2	0.288922	0.936756	2	4.19903	0.903582	2	13.783	0.984832	2	5.59532	0.886466	2	3.04392	1.06368	2	4.961	1.1328	2	5.464	1.03542	2	3.73151	1.01334	2	6.75693
eTSLTVNk	3	A0A0U1RR20	N-Term(TMT10); K8(TMT10)	0.0002514	44.02	0.00376068	2	1349.8	0.571838	0	0.998237	3	3.99726	0.85944	3	20.8107	0.903695	3	1.75886	1.0209	3	6.10424	0.895505	3	8.4311	1.02426	3	22.208	1.19374	3	1.77043	1.12827	3	26.8356	0.950835	3	5.36723
tMIDPTSk	3	A0A087WZB5	N-Term(TMT10); K8(TMT10)	0.00481	28.45	0.136602	2	1350.77	0.238517	0	0.564343	3	0.954881	0.998195	3	3.93146	0.970301	3	0.209643	1.08795	3	3.53874	0.863117	3	2.84207	1.19475	3	6.31984	0.964712	3	3.5215	1.08635	3	2.99912	1.36607	3	6.73405
vGSAmVNAk	3	B2R6V9	N-Term(TMT10); M5(Oxidation); K9(TMT10)	0.005869	30.01	0.0966771	2	1350.78	0.227757	0	1.01818	3	2.721	0.965343	3	0.906836	1.00426	3	4.05484	1.00135	3	1.83399	0.934899	3	9.19563	1.00428	3	6.2366	0.934326	3	8.046	0.922801	3	1.94656	1.14308	3	25.319
aGLQVYNk	2	E9PNW4	N-Term(TMT10); K8(TMT10)	0.0001169	39.47	0.00976709	2	1350.82	0.750699	0	1.05975	2	1.16715	0.956803	2	0.426266	1.19199	2	3.88835	1.01015	2	3.68947	0.851904	2	1.93801	0.928211	2	1.6072	1.22058	2	3.6476	0.934451	2	6.68359	1.05054	2	8.6027
gSEmVVAGk	31	B2RMS9;B7ZKJ8;B7Z8Q7;B7Z544	N-Term(TMT10); M4(Oxidation); K9(TMT10)	0.0007753	49.63	0.000810164	2	1351.77	1.39325	0
mLEEIMk	27	A0A140VJJ6;D3DP16	N-Term(TMT10); K7(TMT10)	0.004063	33.96	0.0298531	2	1351.77	-0.284584	0
aLQEYAAk	18	P13671;A8K8Z4	N-Term(TMT10); K8(TMT10)	0.0006537	46.69	0.00175396	2	1351.8	1.28367	0
vcEGAAck	16	P01031	N-Term(TMT10); C2(Carbamidomethyl); C7(Carbamidomethyl); K8(TMT10)	0.0001368	37.03	0.00964013	2	1352.71	-0.180973	0	1.20655	16	7.20516	0.857782	16	4.92806	1.2317	16	5.46911	0.902392	16	4.9775	0.943161	16	9.71124	1.01309	16	6.48053	1.19012	16	4.12884	0.819944	16	4.3263	1.13788	16	3.83206
gDSQSSWk	6	P04275;L8E853	N-Term(TMT10); K8(TMT10)	0.0001271	43.92	0.00223435	2	1352.72	0.655069	0
qSWSVck	17	C0JYY2	N-Term(TMT10); C6(Carbamidomethyl); K7(TMT10)	0.003865	30.91	0.0542127	2	1352.74	0.152626	0	1.12661	17	9.02072	0.907516	17	5.71204	0.976596	17	9.54104	1.11544	17	5.28014	0.82076	17	6.62726	1.07797	17	10.367	1.02173	17	5.5665	0.921149	17	10.5447	0.958986	17	11.1304
acNHPAPk	3	P27918	N-Term(TMT10); C2(Carbamidomethyl); K8(TMT10)	0.005663	30.71	0.0543476	3	1352.75	-0.0673983	0	1.18431	3	15.0985	1.27361	3	17.1336	0.926545	3	12.845	0.964563	3	2.87411	0.818352	3	10.2755	0.86508	3	7.73949	0.983597	3	0.943508	1.09998	3	1.04	0.871882	3	4.26576
iVEMSTSk	2	I3L397	N-Term(TMT10); K8(TMT10)	0.001761	28.21	0.112501	2	1352.79	0.219681	0	0.746843	2	13.1146	1.01254	2	9.40324	1.00283	2	0.716955	1.12867	2	9.40516	0.901465	2	6.06096	1.12135	2	4.12309	0.993176	2	7.03075	0.975332	2	5.0781	1.15397	2	15.6347
eAILAIHk	4	O43707	N-Term(TMT10); K8(TMT10)	0.001079	40.51	0.00419258	3	1352.86	-1.46144	0	0.556048	4	17.8622	0.943122	4	2.82131	1.03507	4	10.3042	1.08321	4	1.11839	0.997456	4	7.868	1.18417	4	0.931689	0.911709	4	2.98775	1.01378	4	2.60601	1.31815	4	9.0123
iPLDLVPk	14	P01031	N-Term(TMT10); K8(TMT10)	0.003691	33.77	0.0168743	3	1352.89	0.242958	0	1.29764	14	5.26638	1.02859	14	4.01173	1.08848	14	6.61487	0.99635	14	3.32982	0.78324	14	7.95793	0.890083	14	6.57607	1.288	14	6.22496	0.964359	14	4.91507	0.822037	14	8.15981
cVEISck	19	P08603;A8K5T0	N-Term(TMT10); C1(Carbamidomethyl); C6(Carbamidomethyl); K7(TMT10)	0.003849	30.28	0.0458468	2	1353.73	1.89001	0
dGYLFQLLR	10	P04196;B2R8I2	N-Term(TMT10)	0.004902	45.33	0.00202818	3	1353.77	-0.39247	0
gVLHNEVk	10	A0A0U1RR20	N-Term(TMT10); K8(TMT10)	0.0001374	52.8	0.000328529	2	1353.83	1.88741	0	0.871609	10	11.9407	0.945255	10	7.97838	0.948088	10	11.8456	0.949479	10	7.26283	0.953505	10	7.60105	0.914433	10	9.60443	0.982293	10	9.12459	1.02011	10	10.7748	1.25485	10	6.95172
hDLGHFMLR	2	M0R192	N-Term(TMT10)	0.00263	35.08	0.0160816	4	1354.72	-0.23553	0	0.852112	2	62.8778	1.20258	2	25.7675	1.35839	2	10.5773	1.28348	1		0.924379	2	67.308	1.29169	2	28.1261	1.30154	1		1.06093	2	3.1342	0.966122	2	57.2133
lIDVISmYR	3	C0JYY2;Q59HB3;E1B4S9	N-Term(TMT10); M7(Oxidation)	0.006339	33.02	0.0321282	2	1354.76	1.39822	0
lHVxPENFR	54	P68871;B3VL17;P02042;Q4TZM4	N-Term(TMT10); X4(D)	0.0002263	39.9	0.00555136	3	1355.73	0.40486	0
hVcGALLk	10	P43652	N-Term(TMT10); C3(Carbamidomethyl); K8(TMT10)	0.0001355	45.41	0.00131785	2	1355.82	0.826943	0	1.12939	10	4.01627	0.821365	10	4.76416	0.967441	10	5.06359	0.871781	10	4.44572	0.887091	10	7.16833	0.999698	10	7.82086	1.11112	10	5.19783	1.34228	10	6.17368	1.04698	10	8.49849
aGEVQEPELR	22	P25311	N-Term(TMT10)	1.828e-05	60.17	4.33206e-05	2	1356.73	0.255153	0	1.12599	22	9.55806	0.998149	22	5.46628	0.957785	22	10.7709	0.951442	22	8.73645	1.04716	22	15.0443	1.01302	22	4.81354	1.11506	22	6.54307	0.861938	22	9.5089	1.11073	22	5.8261
vYLSEck	29	P00747	N-Term(TMT10); C6(Carbamidomethyl); K7(TMT10)	0.007365	32.1	0.0339744	2	1356.76	-0.237542	0	1.11478	29	5.45623	0.951727	29	4.28997	0.985808	29	9.05675	0.982304	29	5.01241	0.889868	29	4.74725	0.967551	29	8.67029	1.05909	29	5.65846	1.03011	29	6.32818	1.1078	29	7.43087
qQLTGHSk	3	Q9Y490	N-Term(TMT10); K8(TMT10)	0.0002242	36.33	0.0133982	2	1356.8	2.59367	0	0.842651	3	13.2792	1.24069	3	5.40812	1.30465	3	14.8741	0.980897	3	6.72723	2.01166	3	39.565	0.719283	3	55.7813	0.694396	3	50.1029	0.458043	3	65.086	0.933407	3	64.6794
eNAGEDPGLAR	3	P81605	N-Term(TMT10)	0.0005205	42.14	0.00157623	2	1357.69	1.0585	0	0.924421	3	5.0869	0.924724	3	3.9292	1.04138	3	8.58387	0.933035	3	1.61075	1.18669	3	17.2511	1.16509	3	3.45067	0.95758	3	6.01366	1.23471	3	4.73482	0.755823	3	10.593
yTcLPGYVR	11	B4E1D8;P04003	N-Term(TMT10); C3(Carbamidomethyl)	3.732e-05	41.71	0.00248901	2	1357.71	0.233839	0
hNLGHGHk	21	B4E1C2	N-Term(TMT10); K8(TMT10)	5.424e-05	44.88	0.00284126	2	1357.79	1.96361	0	0.962541	21	14.5877	1.05827	21	8.35836	1.21237	21	9.66336	0.530643	21	43.6162	1.02819	21	6.99548	1.03232	21	6.38783	1.1722	21	8.06823	1.1444	21	10.9439	1.12672	21	12.3201
gPLDQLEk	31	P05546	N-Term(TMT10); K8(TMT10)	0.0007479	44.33	0.00237991	2	1357.81	-0.310707	0	1.02392	31	4.92932	0.964087	31	4.33558	1.06545	31	6.9159	0.970334	31	5.93313	0.935017	31	6.60913	0.952524	31	4.08135	1.08916	31	7.74121	0.984732	31	5.06685	1.12531	31	5.35848
gEFYIGSk	64	P00450	N-Term(TMT10); K8(TMT10)	8.161e-05	49.59	0.000859423	2	1358.77	-0.92418	0	1.09298	64	5.82041	0.964198	64	5.23529	1.08703	64	5.28521	0.984838	64	5.98739	0.944544	64	9.46033	0.985944	64	5.66279	1.06001	64	5.72309	0.984907	64	6.19512	0.99859	64	6.99071
gQTLLAVAk	10	P02750;Q68CK4	N-Term(TMT10); K9(TMT10)	2.161e-05	61.72	4.47193e-05	2	1358.88	-0.509875	0
aASGTQNNVLR	16	P10643;B2R6W1	N-Term(TMT10)	7.662e-07	71.28	4.93013e-06	2	1359.76	0.864415	0
dGSTIPIAk	7	A8K1K1	N-Term(TMT10); K9(TMT10)	0.0001659	48	0.00206036	2	1359.83	1.19744	0	1.11818	7	7.1245	0.902851	7	2.90457	0.977726	7	2.30902	1.00422	7	6.40437	0.917104	7	3.1673	0.959409	7	4.57955	0.895093	7	2.18602	1.13291	7	5.58486	1.13812	7	7.99766
aILGATEVk	2	Q9BTY2	N-Term(TMT10); K9(TMT10)	6.022e-06	55.55	0.000346176	2	1359.86	0.200384	0	1.17674	2	5.41743	0.886535	2	2.3044	1.14887	2	16.5365	0.883138	2	2.1579	0.944063	2	1.93393	1.01681	2	3.13606	1.0449	2	6.11218	1.09823	2	12.8188	0.962759	2	3.61566
sTSSFScLSR	2	P35908	N-Term(TMT10); C7(Carbamidomethyl)	1.634e-05	36.35	0.00433353	2	1360.67	-0.335437	0	0.928708	2	11.8312	0.897863	2	2.61777	1.11232	2	9.98422	0.88889	2	2.0964	0.843813	2	0.329829	0.980625	2	5.15613	1.52961	2	6.0426	0.997192	2	1.8875	1.12514	2	2.37041
eFDHNSNIR	40	P08603;A8K5T0	N-Term(TMT10)	0.0001689	49.08	0.00029292	3	1360.68	-0.631346	0
nIPcAVTk	12	P13671;A8K8Z4	N-Term(TMT10); C4(Carbamidomethyl); K8(TMT10)	0.0005948	33.74	0.0638018	2	1360.8	-1.00557	0
lELLSLSk	5	P22792	N-Term(TMT10); K8(TMT10)	0.00142	40.37	0.00363201	2	1360.88	-2.13509	0	1.10564	5	4.66693	1.04781	5	3.37885	0.941973	5	14.7374	0.995254	5	3.70915	0.844088	5	8.61756	0.921597	5	10.6716	1.16221	5	4.2907	1.00175	5	0.380014	1.06969	5	8.95309
gYSFTTTAER	16	P60709;P63261	N-Term(TMT10)	9.479e-08	74.26	1.27491e-06	2	1361.69	0.877099	0
gDATPEGEk	1	B7Z766	N-Term(TMT10); K9(TMT10)	0.001252	33.79	0.0233985	2	1361.73	-0.959979	0	0.725447	1		0.940461	1		1.16797	1		1.07907	1		0.902893	1		1.07891	1		0.945401	1		0.969739	1		1.33102	1
tNLLQVcER	7	A0A024QZN4	N-Term(TMT10); C7(Carbamidomethyl)	3.274e-05	46	0.00167417	2	1361.74	-0.00365318	0	0.57689	7	17.1198	0.999566	7	6.71892	0.8539	7	10.6431	1.07537	7	3.35949	0.904558	7	7.1558	1.18783	7	6.02464	0.894391	7	5.71287	1.10686	7	3.87544	1.34358	7	13.0011
vLSSIEQk	20	P61981;P31946;Q04917;P27348	N-Term(TMT10); K8(TMT10)	0.004804	39.92	0.00620831	3	1361.84	1.55574	0
hPNVFGFcR	10	P04196;B2R8I2	N-Term(TMT10); C8(Carbamidomethyl)	0.001415	43.2	0.00145025	3	1362.69	-1.70606	0
vPMMSDPk	18	P36955	N-Term(TMT10); K8(TMT10)	0.003936	35.03	0.0190786	2	1362.75	0.534357	0	1.2087	18	7.47615	0.964643	18	6.92566	1.07513	18	6.50785	0.92426	18	3.26599	0.827832	18	9.89652	0.93754	18	9.42667	1.08214	18	4.65925	1.10241	18	8.72676	1.04767	18	4.92986
gLEWVSSISR	1	A0A125U0V1	N-Term(TMT10)	0.0002759	26.48	0.143602	2	1362.76	-2.11397	0	1.15134	1		0.934284	1		1.81951	1		0.936289	1		2.31172	1		0.499858	1		0.619636	1		0.656434	1		0.333502	1
lPYQcPk	15	G3XAM2;Q6LAM1	N-Term(TMT10); C5(Carbamidomethyl); K7(TMT10)	0.006179	27.44	0.13144	2	1363.78	-0.0219848	0
gTEDEVEk	2	V9HW25	N-Term(TMT10); K8(TMT10)	0.0009471	36.81	0.0284012	2	1364.73	-0.977075	0	0.464215	2	31.4085	1.00425	2	2.0921	1.20485	2	1.53011	1.12712	2	1.21083	0.972209	2	5.23783	1.2863	2	2.99764	0.754336	2	8.8724	0.926105	2	3.87929	1.31416	2	4.40843
qFVTATDVVR	4	P13796	N-Term(TMT10)	9.261e-06	56.95	0.000356544	2	1364.78	1.09081	0	1.01547	4	2.50844	1.03642	4	3.90258	1.08252	4	19.2644	0.944209	4	2.1885	0.927918	4	11.8089	1.01482	4	4.29969	1.10937	4	3.74615	0.989571	4	5.95143	1.05167	4	4.82834
sLDLVTMk	1	D6RDU5	N-Term(TMT10); K8(TMT10)	0.002674	26.51	0.166513	2	1364.82	-1.67007	0	0.662151	1		0.902585	1		1.02924	1		1.1296	1		0.807651	1		1.23415	1		1.12272	1		1.00754	1		1.18527	1
aDLIAYLk	1	C9JFR7	N-Term(TMT10); K8(TMT10)	0.0005775	38.96	0.00747733	2	1364.86	0.267566	0	0.665308	1		1.21817	1		0.922062	1		1.05541	1		0.867836	1		1.12446	1		1.05845	1		0.885337	1		1.30787	1
nLLSVAYk	8	P62258;P61981;P31946;Q04917;P27348;P63104	N-Term(TMT10); K8(TMT10)	0.0005228	40.53	0.00535052	2	1365.85	0.445574	0
mHVLHcQGR	10	P10643;B2R6W1	N-Term(TMT10); C6(Carbamidomethyl)	0.0002535	40.08	0.00385336	3	1366.7	0.398996	0
hDWGHEk	14	B4E1C2	N-Term(TMT10); K7(TMT10)	0.001066	30.36	0.0531099	3	1366.73	2.14759	0	1.0531	14	1.88856	1.13096	14	5.09668	1.04625	14	6.71387	0.558744	14	17.44	1.08808	14	5.48105	0.988057	14	6.03449	1.16564	14	5.88696	1.15766	14	4.99472	1.0625	14	9.57845
vGEFSGANk	8	P10599	N-Term(TMT10); K9(TMT10)	3.397e-05	40.38	0.00540112	2	1366.77	-1.97689	0	0.672148	8	16.4045	0.954803	8	3.6357	1.0227	8	5.50112	1.0659	8	3.83649	0.86827	8	7.07694	1.1568	8	4.37028	0.996885	8	3.6841	1.0346	8	1.95679	1.36107	8	3.43404
iEDGFSLk	78	P01008	N-Term(TMT10); K8(TMT10)	0.001304	42	0.004117	2	1366.8	0.164042	0	1.05591	78	6.4914	0.935666	78	5.0017	0.938293	78	6.07558	1.05089	78	3.99792	0.859008	78	8.27481	1.0327	78	6.91088	1.14725	78	6.89677	0.973449	78	4.86295	1.09763	78	7.13421
aSPFPVYk	1	Q12860	N-Term(TMT10); K8(TMT10)	0.001508	17.64	1.26471	2	1366.81	-0.447384	0	1.19834	1		0.935369	1		1.1114	1		0.86627	1		1.38478	1		0.877867	1		1.06562	1		0.927079	1		0.851244	1
gMALFGEGk	15	C0JYY2;Q59HB3	N-Term(TMT10); K9(TMT10)	4.478e-06	62.64	3.15812e-05	2	1367.78	0.363668	0
aGAHLQGGAk	9	P04406	N-Term(TMT10); K10(TMT10)	1.77e-06	50.86	0.000502875	2	1367.82	-0.118293	0	0.530146	9	46.1287	0.992403	9	8.00624	0.937969	9	21.6498	1.24473	9	10.566	1.21023	9	23.0704	1.03544	9	12.7688	0.889878	9	6.71296	0.943687	9	5.91005	1.14867	9	14.6306
vFQFLEk	3	P01031	N-Term(TMT10); K7(TMT10)	0.006461	31.74	0.0382504	2	1368.83	0.419492	0	1.27658	3	2.70885	0.981474	3	5.6125	1.09094	3	3.70641	0.924836	3	2.33821	0.76371	3	7.94471	0.921978	3	7.22303	1.30732	3	3.18813	0.991506	3	1.93232	0.945975	3	5.56481
aTQALVLAPTR	2	J3KTB5	N-Term(TMT10)	8.586e-07	52.41	0.000309736	2	1369.84	0.32001	0	0.703852	2	1.23676	1.00774	2	0.905415	1.00593	2	9.57364	1.0815	2	2.43942	1.05569	2	7.97434	1.10557	2	4.9828	0.910635	2	0.70694	1.0051	2	4.07943	1.18114	2	1.96293
hINIDQFVR	29	C0JYY2	N-Term(TMT10)	3.031e-05	53.75	0.000248379	3	1370.78	0.973219	0	1.1037	29	6.78678	0.930322	29	8.09742	0.986331	29	14.3595	1.09038	29	6.95779	1.03614	29	9.78798	0.99641	29	7.69385	1.01629	29	9.23696	0.984695	29	7.548	0.927696	29	13.6361
dYFMPcPGR	72	P02790	N-Term(TMT10); C6(Carbamidomethyl)	0.001093	34.95	0.00326287	2	1371.64	-0.376271	0	1.12168	72	8.86482	0.981899	72	7.91921	0.97226	72	8.05877	0.984396	72	5.98418	0.876708	72	10.4669	0.973812	72	6.59747	1.12308	72	5.70107	1.04324	72	6.23154	1.01769	72	10.3021
nNVVITVTQR	1	Q6YHK3	N-Term(TMT10)	0.004772	26.21	0.413086	2	1372.81	-0.934812	0	0.875917	1		0.983491	1		0.774236	1		0.972216	1		0.848695	1		1.03921	1		1.16935	1		1.27616	1		1.11498	1
eLLLDLAk	3	B2RBW9	N-Term(TMT10); K8(TMT10)	0.005473	25.95	0.139753	2	1372.88	-0.612141	0	1.14305	3	7.69375	0.825406	3	8.20501	0.89878	3	2.06941	0.945872	3	2.29037	0.853912	3	1.28758	1.0092	3	2.08025	1.31945	3	2.84734	1.10853	3	3.70889	1.07196	3	1.71551
nNVPcSPk	42	P0C0L4;P0C0L5;A0A0G2JPR0	N-Term(TMT10); C5(Carbamidomethyl); K8(TMT10)	0.002994	31.18	0.0418	2	1373.76	1.22705	0
nIILEEGk	5	P23528	N-Term(TMT10); K8(TMT10)	0.002465	36.38	0.0275483	3	1373.84	-0.73089	0	0.572269	5	6.09719	1.04323	5	10.302	0.952734	5	13.4418	1.11456	5	7.96456	1.06848	5	2.09003	1.15147	5	6.33906	0.928777	5	5.4536	0.982401	5	6.01764	1.30502	5	3.35506
eVAGLWIk	1	Q14427	N-Term(TMT10); K8(TMT10)	0.0006805	37.46	0.0201908	2	1373.85	-0.699763	0	1.27872	1		0.972066	1		1.19275	1		0.907823	1		0.805767	1		0.882817	1		1.18018	1		0.996542	1		1.01435	1
cGVALSTPGGAR	2	F5GZZ9	N-Term(TMT10); C1(Carbamidomethyl)	8.133e-05	45.06	0.0016842	2	1374.74	0.684382	0	1.12483	2	14.0732	1.03177	2	0.0836588	0.853057	2	15.9506	0.846037	2	6.69991	0.962258	2	6.07756	0.9226	2	0.963193	1.11351	2	13.4578	1.11168	2	7.9979	1.19469	2	3.02494
vFASLPQVER	2	O75083;Q53GN4	N-Term(TMT10)	0.007219	39.85	0.00887634	2	1374.79	-3.43683	0
iTQDAQLk	23	B2R9F2	N-Term(TMT10); K8(TMT10)	0.0005883	41.91	0.0070762	2	1374.84	0.632912	0	1.14723	23	5.6344	1.00361	23	4.67393	0.980369	23	4.59923	1.06925	23	8.76539	1.1002	23	4.70839	0.853628	23	5.573	0.981506	23	8.11169	0.941863	23	4.89741	0.9827	23	5.96466
qVSGPLTSk	8	I3L145	N-Term(TMT10); K9(TMT10)	0.0002319	35.04	0.0343878	2	1374.84	1.16564	0	1.18658	8	4.36835	1.04788	8	3.09246	0.914505	8	4.91833	1.01491	8	5.69924	0.843111	8	23.17	0.915658	8	7.72515	1.50199	8	22.4233	0.872916	8	20.2175	1.0304	8	11.3678
lGVTANDVk	3	P40925	N-Term(TMT10); K9(TMT10)	5.246e-05	39.24	0.0118588	2	1374.84	2.31262	0	0.670022	3	3.47177	0.919547	3	1.30319	0.830845	3	11.1733	0.952579	3	0.809317	1.23231	3	20.4698	1.20684	3	2.38775	0.951384	3	4.60057	1.1529	3	4.77849	1.16168	3	12.427
aVELAANTk	3	A0A0B4J1R6	N-Term(TMT10); K9(TMT10)	0.0005664	25.71	0.294717	2	1374.84	1.24716	0	0.906466	3	4.80101	0.983653	3	3.21414	1.02873	3	11.7729	0.965373	3	7.17152	1.14398	3	4.0613	0.893997	3	1.76019	1.0255	3	5.4071	1.00658	3	3.10941	1.03528	3	16.636
lDGIcWQVR	3	P07360	N-Term(TMT10); C5(Carbamidomethyl)	0.0001425	28.59	0.0636441	2	1375.73	-0.464109	0	0.967226	3	3.67164	0.819595	3	3.65288	0.885105	3	11.4943	1.01393	3	8.45928	1.305	3	14.5741	0.761655	3	0.850109	0.920464	3	3.55307	1.33264	3	1.09738	0.967412	3	6.00708
gSSSSPLGISVR	2	Q9NTU7	N-Term(TMT10)	0.0001792	36.11	0.0174863	2	1375.77	0.285295	0	0.879288	2	0.137896	0.930367	2	0.379461	0.901951	2	4.51472	0.851071	2	11.1488	1.19155	2	20.4712	1.15311	2	6.75074	0.984024	2	2.39588	1.1602	2	9.04093	1.0401	2	15.2725
dSVTGTLPk	19	P03952	N-Term(TMT10); K9(TMT10)	0.0008017	45.06	0.00284599	2	1375.82	3.64097	0	1.10537	19	6.90745	1.01116	19	3.34614	0.929975	19	3.19374	1.07379	19	5.02618	1.01055	19	8.2366	0.94536	19	5.54213	0.941308	19	6.58175	0.953845	19	4.13443	1.06641	19	5.86245
vTWSTVPk	1	A0A087X0M8;B3KX75	N-Term(TMT10); K8(TMT10)	0.0009006	31.94	0.0528421	2	1375.84	0.896865	0
iISSIEQk	5	P62258	N-Term(TMT10); K8(TMT10)	0.005252	39.62	0.00758551	3	1375.86	0.656668	0	0.614536	5	13.2008	0.979194	5	2.11881	0.974305	5	2.89405	1.11776	5	5.53964	0.938422	5	2.98775	1.16667	5	9.17533	0.967279	5	2.08334	1.05759	5	1.12353	1.2617	5	7.30346
lVGGDNLcSGR	7	O43866	N-Term(TMT10); C8(Carbamidomethyl)	2.729e-06	47.85	0.000738265	2	1376.72	1.20672	0	1.17368	7	9.51966	1.24053	7	2.3803	1.15707	7	6.64543	1.34924	7	2.89175	1.29464	7	5.86188	0.635935	7	13.6789	0.725768	7	16.4782	0.668696	7	6.8088	0.589876	7	6.70364
sGIEcQLWR	15	P00734	N-Term(TMT10); C5(Carbamidomethyl)	0.0001276	41.68	0.00301906	2	1377.71	-0.0291003	0	1.06013	15	12.9934	0.93266	15	9.03515	0.948193	15	5.49782	1.04757	15	7.51032	0.870078	15	12.6364	1.02378	15	3.09695	1.0277	15	7.38627	1.0259	15	5.88975	1.11632	15	13.9828
sFYTAYLQR	1	O00391	N-Term(TMT10)	0.004187	13.04	2.68656	2	1377.74	0.755628	0	0.978154	1		0.965705	1		0.82602	1		1.08629	1		0.875914	1		1.17512	1		0.939529	1		1.13789	1		0.978899	1
sLGNVIMVcR	4	P08603	N-Term(TMT10); C9(Carbamidomethyl)	0.0005809	42.97	0.00287152	3	1377.75	-3.38762	0	1.33111	4	8.78772	0.476827	4	19.3137	1.04483	4	7.7511	0.859366	4	8.90567	1.29085	4	7.96922	0.860747	4	2.23256	1.16231	4	11.6623	1.09414	4	15.3686	1.15895	4	3.24553
qGIPFFGQVR	12	P01023	N-Term(TMT10)	5.746e-05	41.92	0.00489728	2	1377.78	0.628841	0	1.64636	12	12.4188	1.46823	12	5.50224	1.4891	11	6.51718	1.78412	12	8.67905	1.64124	12	11.048	0.376307	11	64.7998	0.357435	11	67.5334	0.359524	8	79.7624	0.317694	5	58.1219
gSFPWQAk	10	P00739;P00738	N-Term(TMT10); K8(TMT10)	0.001546	36.59	0.0175205	2	1378.79	0.260075	0
gLFIIDDk	2	A0A0A0MSI0	N-Term(TMT10); K8(TMT10)	0.0002623	46.64	0.00153365	2	1378.83	-0.28951	0	0.676507	2	2.51131	0.944713	2	7.384	1.27367	2	11.735	1.05788	2	0.476734	0.944693	2	6.49487	0.961101	2	15.9072	1.14768	2	25.5623	0.921765	2	5.85008	1.25509	2	23.4408
dDTVcLAk	40	Q53H26;B4E1B2	N-Term(TMT10); C5(Carbamidomethyl); K8(TMT10)	0.0006725	48.17	0.00103407	2	1379.76	1.34617	0
yLQGSSVQLR	3	Q6EMK4	N-Term(TMT10)	0.0002161	38.4	0.0114768	2	1379.78	-0.259522	0	1.10648	3	5.88974	0.98943	3	4.11364	1.11854	3	21.9325	0.981321	3	7.69277	1.05822	3	1.31602	0.955873	3	0.0646625	1.03343	3	2.58803	0.872387	3	7.47742	0.941529	3	15.4213
sIAGISYGQVR	1	Q9ULI3	N-Term(TMT10)	5.786e-06	43.37	0.0037718	2	1379.78	0.264054	0	1.01468	1		0.970974	1		1.06395	1		0.971863	1		1.12278	1		0.985357	1		1.09918	1		0.971338	1		0.951026	1
eQPGVYTk	12	P03952	N-Term(TMT10); K8(TMT10)	0.001807	46.35	0.00178787	2	1379.79	0.523087	0	1.13512	12	5.10601	0.995996	12	2.95221	0.917446	12	6.37331	1.0961	12	3.42124	0.957231	12	7.11799	0.96065	12	8.00047	0.987423	12	4.27179	0.989177	12	4.26285	1.0151	12	3.65186
fQEGQEEER	4	B2R6V9	N-Term(TMT10)	0.000641	35.99	0.00337369	3	1380.66	-0.137974	0	0.937834	4	13.6435	0.955885	4	4.74591	1.0281	4	11.4334	1.14282	4	9.81998	0.927904	4	8.87157	1.07346	4	0.670616	0.973301	4	8.81285	0.949734	4	2.01989	0.965832	4	2.66514
mSYcYAk	1	P35555	N-Term(TMT10); C4(Carbamidomethyl); K7(TMT10)	0.002959	15.32	1.12659	2	1380.71	0.791868	0	1.18209	1		0.927866	1		1.03632	1		0.868886	1		0.978041	1		0.878535	1		1.24843	1		1.06834	1		1.04189	1
fTNIGPDTMR	25	A0A024R462	N-Term(TMT10)	0.001508	39.5	0.00465638	2	1380.71	-0.0596089	0	1.20231	25	7.14307	0.902519	25	10.1542	0.978127	25	6.91041	0.908504	25	3.21999	1.08113	25	6.95684	1.00907	25	6.99345	1.23881	25	9.05695	1.07828	25	11.2854	0.717021	25	11.594
lANVMMGPYR	1	A0A024QZN4;B4E3Q9	N-Term(TMT10)	0.0002872	40.16	0.00588418	2	1380.73	0.0626662	0
mVQQEck	23	P43652	N-Term(TMT10); C6(Carbamidomethyl); K7(TMT10)	0.005042	29.74	0.0698596	2	1380.74	1.11553	0	1.16076	23	6.95242	0.836001	23	8.12985	0.934251	23	8.04903	0.844423	23	5.10033	0.850848	23	6.11899	0.952137	23	2.32966	1.16743	23	5.63836	1.29733	23	8.29878	1.01365	23	8.4552
aLPTTYEk	23	A0A024R035	N-Term(TMT10); K8(TMT10)	0.0004777	43.64	0.00307301	2	1380.81	0.247161	0	1.1725	23	7.38601	1.0012	23	4.3722	1.19666	23	8.9315	0.870418	23	6.14414	0.940312	23	5.12023	0.847138	23	7.8908	1.13931	23	5.03887	0.967199	23	7.19618	1.04594	23	7.74847
nTLYLQMNR	1	A2J422	N-Term(TMT10)	0.0004036	35.69	0.0155929	2	1381.75	1.35845	0	0.987241	1		1.19809	1		1.30524	1		1.05234	1		2.27877	1		0.594016	1		0.686063	1		0.520038	1		0.522061	1
aLGHLDLSGNR	22	P02750;Q68CK4	N-Term(TMT10)	0.0008928	50.1	0.000666964	3	1381.77	0.0102993	0
tVIGPDGHk	49	P02671	N-Term(TMT10); K9(TMT10)	0.0005613	52.73	0.000299468	2	1381.82	1.28515	0	1.24872	49	8.52372	0.983362	49	5.96733	1.25071	49	9.75953	0.973968	49	8.27946	1.20279	49	10.8143	0.794308	49	9.04515	1.10262	49	6.02977	0.799558	49	14.0925	0.822106	49	9.964
qSFDLSVk	17	C0JYY2;Q59HB3	N-Term(TMT10); K8(TMT10)	0.004251	36.02	0.0152271	3	1381.81	-0.948277	0
fSGSLLGDk	2	Q5CZ94	N-Term(TMT10); K9(TMT10)	0.0003928	29.01	0.0748594	2	1381.81	2.78661	0	1.35008	2	8.3881	1.18971	2	12.8998	1.51122	2	8.85896	1.17049	2	25.3429	1.9335	2	34.3902	0.471462	2	22.6742	0.537092	2	19.7724	0.439152	2	15.5405	0.399203	2	29.8517
iLGGHLDAk	44	P00739;P00738	N-Term(TMT10); K9(TMT10)	0.0001024	48.42	0.000525881	2	1381.86	0.568976	0
qGNPVAPIk	1	B7Z462	N-Term(TMT10); K9(TMT10)	0.001119	31.24	0.0274718	2	1381.86	0.568976	0	1.0306	1		1.1753	1		1.08999	1		1.03354	1		1.04114	1		0.850978	1		0.98011	1		1.01536	1		0.845678	1
vADFLSWcR	1	H0Y984	N-Term(TMT10); C8(Carbamidomethyl)	0.004871	15.1	1.22994	2	1382.71	0.0235794	0	1.00021	1		0.884981	1		0.772049	1		0.96977	1		0.851349	1		1.1652	1		1.20935	1		1.13607	1		1.10458	1
aLSIGFETcR	8	A0A1Z1VXF2	N-Term(TMT10); C9(Carbamidomethyl)	3.134e-06	41.56	0.00582675	2	1382.73	1.16269	0	1.03755	8	9.66698	1.0032	8	4.97948	0.95663	8	10.5045	0.950934	8	3.69417	1.23011	8	18.3435	0.971693	8	3.12174	1.09076	8	8.23171	0.965818	8	7.91484	0.939293	8	13.1467
nIGEFcGk	22	Q53HT9	N-Term(TMT10); C6(Carbamidomethyl); K8(TMT10)	0.0007839	40.93	0.00723283	2	1382.75	-0.263078	0	1.11241	22	12.9035	0.982307	22	7.54824	1.17529	22	34.6269	0.94656	22	4.59315	1.10196	22	37.4368	0.878618	22	18.8907	1.18169	22	11.3608	0.923887	22	20.1272	0.944122	22	16.689
dFSLWEk	21	C0JYY2;Q59HB3	N-Term(TMT10); K7(TMT10)	0.007052	25.06	0.247484	2	1382.77	-0.0325759	0
gTAQYGVTk	2	H0YD65	N-Term(TMT10); K9(TMT10)	8.244e-06	62.78	3.06848e-05	2	1382.81	1.90853	0	1.51988	2	43.6432	0.933863	2	8.55099	1.01085	2	7.01067	0.995899	2	5.40407	0.824118	2	8.43165	0.857547	2	13.8114	1.06543	2	15.3549	0.891844	2	15.9568	0.979131	2	3.30469
mEILHPGk	8	P13671;A8K8Z4	N-Term(TMT10); K8(TMT10)	0.007134	31.78	0.0426787	3	1382.82	0.218822	0
dYEDQQk	17	P02671	N-Term(TMT10); K7(TMT10)	0.005383	29.35	0.0475032	2	1383.71	-0.552102	0	1.36359	17	10.154	0.886311	17	5.16158	1.25462	17	9.28057	0.945403	17	3.9499	1.58198	17	4.82547	0.663995	17	16.3299	1.0428	17	7.00249	0.803197	17	7.48845	0.737689	17	15.1957
gmALFGEGk	4	C0JYY2;Q59HB3	N-Term(TMT10); M2(Oxidation); K9(TMT10)	0.002041	45.8	0.0014769	2	1383.77	0.682009	0
gEWVALNPLR	7	P08603;A8K5T0	N-Term(TMT10)	3.74e-05	44.23	0.00237682	2	1383.79	-2.33696	0
wHQVEVk	16	I3L145	N-Term(TMT10); K7(TMT10)	0.002945	35.87	0.0190751	2	1383.82	0.398887	0	1.21843	16	5.79876	1.02651	16	5.95054	0.828755	16	16.1825	1.03826	16	5.37368	0.818636	16	14.633	0.943956	16	4.77464	1.53377	16	14.6558	0.739611	16	9.50787	1.0355	16	8.13719
tGTHGLLVk	19	P01023	N-Term(TMT10); K9(TMT10)	8.32e-05	49.53	0.00030866	2	1383.87	0.292681	0	1.62569	19	11.3426	1.51149	19	8.17053	1.56984	19	12.4519	1.74941	19	2.7825	1.65109	19	8.34356	0.245363	18	37.1986	0.278728	16	67.0043	0.231995	10	67.2284	0.216638	8	45.7328
aDQcYEDVR	2	P31146	N-Term(TMT10); C4(Carbamidomethyl)	8.396e-05	43.98	0.000333954	2	1384.64	-0.680074	0	0.507323	2	8.78303	1.07043	2	10.2035	0.926922	2	3.97441	0.969374	2	7.88715	0.908539	2	13.0412	1.26577	2	11.4918	0.97081	2	7.63861	1.0698	2	1.2775	1.40166	2	5.39889
vGEYSLYIGR	24	P02743	N-Term(TMT10)	0.0001115	47.57	0.000991288	3	1385.76	-0.789099	0	1.09066	24	6.91024	0.988783	24	5.21579	1.16109	24	8.20882	0.999438	24	2.94008	0.879528	24	10.2335	0.91334	24	3.31569	1.05013	24	5.91739	0.97078	24	5.05139	1.03915	24	9.18534
gHcQLGQk	20	P13671;A8K8Z4	N-Term(TMT10); C3(Carbamidomethyl); K8(TMT10)	0.000274	47.2	0.00116519	2	1385.78	4.56409	0
sPAFTDLHLR	31	C0JYY2;Q59HB3	N-Term(TMT10)	0.0001148	56.89	0.000125856	3	1385.77	0.209828	0
hVAEAIck	44	C0JYY2;Q7Z7Q0	N-Term(TMT10); C7(Carbamidomethyl); K8(TMT10)	0.0009769	43.95	0.00284117	2	1385.8	5.17086	0
dYEILFk	3	A8K335	N-Term(TMT10); K7(TMT10)	0.00593	31.33	0.0517185	2	1385.81	0.122555	0	1.22366	3	2.73592	0.916482	3	1.86426	1.00636	3	0.213326	0.955535	3	0.317519	0.964416	3	5.51417	0.843395	3	2.61216	0.99403	3	2.91463	1.09801	3	4.66087	1.10946	3	1.58279
dYIEFNk	32	P25311	N-Term(TMT10); K7(TMT10)	0.006764	37.36	0.0105234	2	1386.77	0.476232	0	1.31694	32	6.98913	0.975377	32	5.2999	1.06758	31	6.29059	0.985186	32	4.42223	0.924382	32	9.24301	0.889436	32	7.01815	1.15781	32	5.39308	0.848122	32	8.65215	1.06428	32	9.57364
aAISGENAGLVR	51	P19827;B7Z539	N-Term(TMT10)	3.596e-09	79.1	8.26741e-07	2	1386.79	0.628785	0
vHSFPTLk	1	B4DNL5	N-Term(TMT10); K8(TMT10)	0.003632	27.1	0.13064	3	1386.85	0.976149	0	0.78952	1		0.998087	1		0.906786	1		1.16984	1		1.12179	1		1.04171	1		1.14257	1		0.815425	1		1.10178	1
qLEQVIAk	35	P02671	N-Term(TMT10); K8(TMT10)	0.0007535	46.58	0.00152202	2	1386.87	-0.702265	0	1.26957	35	5.76433	1.01487	35	2.93688	1.31493	35	5.85545	0.951259	35	4.37903	1.30473	35	3.86897	0.687599	35	9.22596	1.12074	35	5.19296	0.820226	35	5.84276	0.771933	35	9.65131
dYFmPcPGR	13	P02790	N-Term(TMT10); M4(Oxidation); C6(Carbamidomethyl)	0.00773	33.76	0.00319752	3	1387.63	-0.807724	0	1.10409	13	6.34201	0.979034	13	4.86674	0.998299	13	6.04884	0.972128	13	6.38469	0.884499	13	12.6152	0.93106	13	8.39597	1.10429	13	8.61096	0.982151	13	13.99	1.14988	13	9.32359
lGATNPTQk	3	Q6LDG4	N-Term(TMT10); K9(TMT10)	0.0004296	36.9	0.0150782	2	1387.83	1.67473	0	1.38376	3	7.19339	0.980497	3	5.14805	1.05085	3	0.49989	0.999924	3	1.75249	0.862295	3	11.7545	0.956809	3	4.05267	0.890481	3	6.05398	1.0582	3	15.1365	0.967731	3	9.07153
qWAGLVEk	13	P02649;A0A0S2Z3V0	N-Term(TMT10); K8(TMT10)	0.0002692	44.28	0.00298227	2	1388.83	-0.0054045	0
iEEELGDEAR	2	A8K3B0	N-Term(TMT10)	6.225e-05	50.73	0.000298383	2	1389.71	0.53201	0	0.370395	2	29.3402	0.968281	2	2.39823	0.712471	2	3.51256	1.11157	2	3.8688	0.821973	2	0.730906	1.22116	2	1.56926	1.06897	2	28.6204	1.1916	2	10.9192	1.52754	2	11.7456
dFVQPPTk	77	B4E1C2;B4DPP8	N-Term(TMT10); K8(TMT10)	0.006085	33.29	0.0448186	3	1389.81	-0.806437	0
lELSVDGAk	73	P0C0L4;P0C0L5;A0A0G2JPR0	N-Term(TMT10); K9(TMT10)	8.839e-06	60.52	8.26829e-05	2	1389.84	0.0658477	0
tPLTATLSk	17	Q96K68;Q8NCL6;Q6MZW0;Q6ZW64	N-Term(TMT10); K9(TMT10)	0.0001781	57.25	0.000110005	2	1389.87	-1.77355	0
nLDDGIDDER	1	H0YAP2	N-Term(TMT10)	0.0004358	40.41	0.00114649	2	1390.67	0.708857	0	0.38263	1		1.08087	1		0.925036	1		0.885796	1		0.84618	1		1.22811	1		1.01395	1		1.17191	1		1.63465	1
hAWNNYk	3	P33908	N-Term(TMT10); K7(TMT10)	0.004687	10.56	5.50708	3	1390.76	0.44781	0	1.25824	3	1.42378	0.947056	3	0.606235	1.04595	3	8.03939	1.0923	3	5.70543	0.894381	3	3.31467	0.871971	3	11.4595	1.00869	3	0.914992	1.04556	3	8.42834	0.931882	3	6.12803
lIANTLcNSR	6	Q14520	N-Term(TMT10); C7(Carbamidomethyl)	5.514e-06	45.11	0.00194241	2	1390.77	-1.4516	0	1.03885	6	19.545	1.01023	6	5.83844	1.01494	6	18.1682	0.997437	6	5.50126	0.939885	6	13.886	0.914468	6	14.1272	0.937031	6	9.48768	1.10299	6	7.20744	1.01934	6	6.23402
sAVTALWGk	6	P68871;Q4TZM4;B3VL17	N-Term(TMT10); K9(TMT10)	2.081e-05	49.4	0.000962727	2	1390.85	0.854297	0
qGEDAEVVcR	1	D3DSC5	N-Term(TMT10); C9(Carbamidomethyl)	0.0001318	36.34	0.00437836	2	1391.68	0.0368161	0	0.846516	1		1.11029	1		0.91401	1		0.974676	1		0.920661	1		1.07411	1		1.14124	1		1.0161	1		1.11928	1
eSQALQEDSR	1	Q8NDA2	N-Term(TMT10)	4.198e-07	59.86	2.95886e-05	2	1391.7	0.705609	0	1.07254	1		1.10429	1		0.924353	1		1.06249	1		0.882443	1		1.1174	1		0.949079	1		0.9593	1		0.948843	1
sLGNIIMVcR	5	A8K5T0	N-Term(TMT10); C9(Carbamidomethyl)	4.589e-06	50.68	0.000530141	2	1391.77	-1.25679	0	0.754711	5	27.8511	1.5234	5	18.3369	1.00539	5	13.9603	1.1462	5	6.54783	0.662643	5	56.8429	0.90188	5	8.20527	0.914664	5	2.92993	1.27278	5	4.00917	0.734415	5	14.3149
qLGcGSALk	4	F5GZZ9	N-Term(TMT10); C4(Carbamidomethyl); K9(TMT10)	2.633e-06	49.87	0.000809883	2	1391.81	0.185304	0	1.24263	4	4.66282	0.943162	4	1.95354	0.975785	4	10.5016	0.810471	4	7.32203	1.01334	4	3.47245	0.885752	4	10.3975	1.1438	4	3.13614	1.10693	4	12.2029	1.13509	4	4.32006
iEDGTLASk	39	C0JYY2;Q59HB3;Q9UE52	N-Term(TMT10); K9(TMT10)	1.73e-05	57.21	0.000142581	2	1391.82	1.28505	0
nVVFVIDk	28	B2RMS9;B7ZKJ8;B7Z8Q7;B7Z544	N-Term(TMT10); K8(TMT10)	0.0001352	45.7	0.00187465	2	1391.87	-0.384408	0
gLVLGPIHk	1	A0A024R599	N-Term(TMT10); K9(TMT10)	4.134e-05	36.2	0.0104589	3	1391.91	-1.91591	0	1.10876	1		0.937246	1		0.949922	1		0.953676	1		0.929214	1		0.910954	1		1.20573	1		1.21689	1		0.888258	1
eVVQNFAk	4	Q14019	N-Term(TMT10); K8(TMT10)	0.0001729	45.01	0.00310295	2	1392.83	0.756859	0	0.62524	4	15.0199	1.01862	4	6.87039	1.23244	4	5.63152	1.0471	4	1.50005	1.15363	4	12.5526	0.928092	4	2.48386	0.902177	4	8.1563	0.911916	4	2.04096	1.24045	4	6.00145
nMVLQTTk	1	Q9Y6R7	N-Term(TMT10); K8(TMT10)	0.00176	27.81	0.134449	2	1392.83	2.45649	0	1.32961	1		0.791644	1		1.05084	1		0.846352	1		0.79622	1		0.91751	1		1.23071	1		1.32498	1		0.875728	1
tFTLLDPk	13	Q96PD5	N-Term(TMT10); K8(TMT10)	0.002778	41.73	0.00570379	3	1392.85	1.51152	0	1.09319	13	5.84093	0.950496	13	4.10907	0.9014	13	6.20959	0.982217	13	2.08714	0.809206	13	11.3959	0.944557	13	2.77176	1.24525	13	7.92128	1.0605	13	6.13975	1.12428	13	4.39875
sLGNVImVcR	4	P08603	N-Term(TMT10); M7(Oxidation); C9(Carbamidomethyl)	0.000486	39.85	0.00821903	2	1393.75	0.309351	0	1.55037	4	10.2053	0.378142	4	61.8716	1.06195	4	0.540016	0.787513	4	4.3577	1.52396	4	6.86235	0.775345	4	4.18987	1.12327	4	9.08409	0.982264	4	0.894182	1.28961	4	6.68512
dTPFSQIk	24	P03952	N-Term(TMT10); K8(TMT10)	0.001025	44.54	0.00282479	2	1393.81	0.054814	0	1.12588	24	7.04239	0.987611	24	4.57564	0.961523	24	4.84039	1.13128	24	4.16532	0.940562	24	6.79963	0.928511	24	3.95027	0.957906	24	8.88905	0.99353	24	4.18196	1.00949	24	5.1894
mIFEEHGFR	11	B4DN21	N-Term(TMT10)	0.0002625	45.98	0.000873124	3	1394.71	-0.362543	0	1.14389	11	11.8875	0.900344	11	6.40159	0.914449	11	11.2234	0.928005	11	2.12797	1.17175	11	11.2362	0.966375	11	5.61604	1.09468	11	11.3469	1.08533	11	4.21365	0.89509	11	9.44854
fTVETPDk	26	P05543	N-Term(TMT10); K8(TMT10)	0.006431	37.69	0.0108172	2	1394.79	1.272	0	1.10127	26	5.36377	1.02088	26	4.86061	0.899264	26	9.9832	0.903987	26	5.46866	0.996197	26	7.67005	1.02518	26	6.64953	1.13561	26	5.19062	1.07201	26	6.07621	0.976415	26	5.78913
aVLGTSNFk	1	G3V0E5	N-Term(TMT10); K9(TMT10)	0.003499	37.43	0.0115027	2	1394.84	0.825358	0	0.927472	1		0.935623	1		1.00619	1		1.11031	1		0.969549	1		0.878775	1		1.05658	1		1.14627	1		1.01764	1
aTLLDIYk	17	P01031	N-Term(TMT10); K8(TMT10)	0.0008771	43.15	0.00274284	2	1394.87	-0.220176	0	1.24418	17	4.17385	0.974981	17	6.33074	1.12339	17	3.68823	0.961518	17	6.13976	0.897543	17	12.7528	0.943909	17	8.04608	1.2011	17	11.5489	0.906476	17	6.81324	0.861848	17	11.734
iGFGQcAGk	1	P16930	N-Term(TMT10); C6(Carbamidomethyl); K9(TMT10)	1.884e-05	43.74	0.0031679	2	1395.78	0.946726	0	0.876143	1		1.0083	1		0.910483	1		0.973546	1		1.46292	1		0.829611	1		0.980369	1		1.05817	1		1.00396	1
fTNIGPDTmR	10	A0A024R462	N-Term(TMT10); M9(Oxidation)	0.003897	25.01	0.133457	3	1396.71	0.119906	0	1.1298	10	5.69727	0.888312	10	4.02893	1.04113	10	5.92546	0.894375	10	5.3636	1.14822	10	5.55969	1.05834	10	9.79855	1.18653	10	9.81078	0.98166	10	8.78154	0.775554	10	10.7769
aLMDETMk	17	P02649;A0A0S2Z3V0	N-Term(TMT10); K8(TMT10)	0.0001908	45.69	0.00173465	2	1396.76	0.792959	0
rPDPFPSVPR	1	B7ZMJ3	N-Term(TMT10)	0.0002318	31.93	0.0734506	3	1396.79	0.922876	0	1.05984	1		0.984657	1		1.02166	1		0.895321	1		0.888241	1		1.0428	1		1.01132	1		1.06716	1		1.19717	1
eLSSFIDk	122	P02774	N-Term(TMT10); K8(TMT10)	8.478e-05	45.72	0.00288145	2	1396.81	0.815302	0	1.12478	122	6.72591	0.948171	122	6.24738	0.959511	122	8.04593	1.0003	122	4.89111	0.845125	122	9.54362	1.0193	122	6.86257	1.16109	122	6.13951	1.01787	122	5.40864	1.03219	122	6.3127
sLYNLGGSk	2	P13647	N-Term(TMT10); K9(TMT10)	0.002542	33.46	0.0240511	2	1396.82	2.22105	0	0.938381	2	0.976907	1.01561	2	0.676785	1.02388	2	17.2825	0.888945	2	3.53886	0.848892	2	0.787266	1.0724	2	2.92581	1.29478	2	4.82071	1.15287	2	11.8288	0.904698	2	7.59752
tVAYTEQk	5	B3KQT9	N-Term(TMT10); K8(TMT10)	0.000101	44.8	0.00222686	2	1397.8	-0.401276	0	0.52883	5	8.47034	0.990449	5	4.75493	0.897111	5	4.19969	1.114	5	1.03744	0.97536	5	3.82246	1.1801	5	4.77384	0.909041	5	4.68308	0.993025	5	5.62746	1.42887	5	1.82738
sSALDMENFR	35	A2RTY6	N-Term(TMT10)	5.778e-06	53.67	0.000232379	2	1398.69	0.248141	0	1.10501	35	7.09287	0.898959	35	8.47662	0.919741	35	6.47221	1.01953	35	5.85837	0.932752	35	10.5451	0.94075	35	6.44967	1.13971	35	6.67183	1.08057	35	6.93435	1.09186	35	5.62722
dQEEEYk	1	Q8N1N4	N-Term(TMT10); K7(TMT10)	0.00367	39.58	0.00793108	2	1398.72	0.911574	0	0.860193	1		1.18095	1		0.840048	1		0.695166	1		0.593075	1		1.24781	1		1.46102	1		1.35251	1		0.92697	1
sLDEHYHIR	37	C0JYY2	N-Term(TMT10)	5.917e-05	53.63	0.000290669	3	1398.73	0.856552	0	1.19086	37	10.0993	0.957414	37	10.8723	0.950842	37	13.1317	1.10739	37	7.06557	1.08483	37	11.6517	1.08976	37	14.0164	0.924774	37	13.4789	0.808892	37	18.9102	0.840248	37	20.9335
eFMSQGNk	8	Q53HT9	N-Term(TMT10); K8(TMT10)	0.0001647	33.69	0.0310624	2	1398.75	-0.116236	0	1.08603	8	9.36151	0.924377	8	4.89385	0.956057	8	15.3174	0.929136	8	6.2479	1.00682	8	20.7122	0.961515	8	6.31729	1.15696	8	3.83522	1.05585	8	12.8865	0.981158	8	10.1501
lSGEAYGFVAR	3	P04275;L8E853	N-Term(TMT10)	1.513e-05	35.68	0.0194009	2	1398.76	0.384019	0
gTSSTTTTGk	43	P00747	N-Term(TMT10); K10(TMT10)	2.807e-07	59.66	6.64e-05	2	1398.78	0.632269	0	1.0712	43	7.6409	0.986747	43	9.57494	0.978187	43	7.24478	1.00388	43	5.04824	0.822684	43	8.28282	1.00405	43	5.23569	1.10015	43	5.89726	0.971201	43	8.11927	1.14142	43	6.11297
sFTAVcQk	2	O00187	N-Term(TMT10); C6(Carbamidomethyl); K8(TMT10)	0.0002181	30.81	0.0531934	2	1398.78	0.758568	0	1.10982	2	6.40896	0.994345	2	4.34759	0.835402	2	0.0104625	0.888471	2	3.51188	0.864661	2	0.921692	0.951182	2	3.78083	1.21549	2	5.866	1.07584	2	4.94642	1.25275	2	1.56868
tLFcNASk	1	P20851	N-Term(TMT10); C4(Carbamidomethyl); K8(TMT10)	0.0005597	27.56	0.107864	2	1398.79	4.07478	0	1.50526	1		1.18063	1		1.33857	1		1.01285	1		1.21505	1		0.675555	1		0.783799	1		0.671634	1		0.788425	1
hTVNPNMk	1	P12259	N-Term(TMT10); K8(TMT10)	0.001142	25.87	0.159563	3	1398.79	-0.127688	0	0.95642	1		0.895404	1		0.916552	1		1.0324	1		1.006	1		0.956991	1		1.22905	1		1.07789	1		1.05129	1
lMIYEGSk	1	Q5NV89	N-Term(TMT10); K8(TMT10)	0.0007161	30.94	0.0484032	2	1398.81	1.44989	0	0.638411	1		1.03837	1		0.88017	1		0.729413	1		3.81432	1		0.584924	1		0.682015	1		0.469879	1		0.42298	1
lVILEGELER	9	P67936;V9HW25;K7ENT6	N-Term(TMT10)	5.365e-06	47.74	0.000924629	2	1399.84	0.523026	0
lcTPLLPk	3	P27918	N-Term(TMT10); C2(Carbamidomethyl); K8(TMT10)	0.003733	32.32	0.0171152	2	1399.88	0.467549	0	1.05676	3	1.98848	1.25872	3	8.28908	0.947125	3	12.2538	0.906979	3	0.470071	0.842019	3	2.17473	0.928426	3	2.71238	1.04408	3	6.65783	1.1632	3	1.30133	0.935896	3	2.90421
eQLTPLIk	22	P02652	N-Term(TMT10); K8(TMT10)	0.005884	32.68	0.0151333	2	1399.89	1.03808	0	0.807477	22	8.55103	0.718275	22	11.8266	0.575933	22	12.9821	1.52147	22	6.40787	2.88689	22	5.82791	0.595871	22	14.4752	0.656188	22	15.0235	0.624841	22	9.10737	0.576273	22	13.4696
cScAPGYk	7	B4E1C4	N-Term(TMT10); C1(Carbamidomethyl); C3(Carbamidomethyl); K8(TMT10)	0.003578	36.64	0.00799883	2	1400.71	2.36683	0	0.971702	7	4.38389	0.919488	7	2.86799	0.932347	7	1.77306	0.996233	7	3.94242	0.845914	7	5.89132	1.08892	7	1.03324	1.07365	7	8.11007	1.02268	7	6.47843	1.22012	7	7.89029
fGSGYVSGWGR	1	F2RM37	N-Term(TMT10)	0.0009793	25.26	0.0775904	2	1401.71	-0.147057	0	1.24098	1		1.00191	1		1.0737	1		1.01085	1		0.850567	1		0.985419	1		1.22493	1		1.07383	1		0.609701	1
aSSVVVSGTPIR	2	P16930	N-Term(TMT10)	7.37e-07	55.55	0.00024894	2	1401.83	1.12365	0	0.905148	2	2.94519	1.06628	2	8.35559	0.99852	2	0.747813	0.988709	2	0.467136	1.30074	2	10.6308	0.898743	2	14.4717	0.908258	2	5.96127	1.04589	2	3.8388	0.948369	2	14.2197
iLPLTVck	4	P10643;B2R6W1	N-Term(TMT10); C7(Carbamidomethyl); K8(TMT10)	0.00177	43.14	0.00286563	2	1401.89	0.100741	0
vTVFPIGIGDR	2	P04275;L8E853	N-Term(TMT10)	6.074e-05	31.78	0.052668	2	1402.83	1.98416	0
vcNPIITk	2	P11142	N-Term(TMT10); C2(Carbamidomethyl); K8(TMT10)	0.001047	33.92	0.034894	2	1402.85	1.58158	0	0.597918	2	3.94651	0.943135	2	3.12917	1.07443	2	1.2115	1.0652	2	8.09554	0.97135	2	5.74	1.13736	2	0.359974	0.907887	2	0.258966	1.03765	2	2.13126	1.36892	2	3.04688
lTLDIQNk	35	C0JYY2	N-Term(TMT10); K8(TMT10)	0.0006315	41.75	0.00527992	2	1402.87	0.758654	0	1.17931	35	6.61227	0.857897	35	4.69823	0.945232	35	6.58916	1.09473	35	3.33134	0.913787	35	5.48592	1.08839	35	6.85732	1.036	35	4.93468	1.01074	35	5.82605	0.911845	35	5.45144
eGLLLWcQR	5	O43707;P12814	N-Term(TMT10); C7(Carbamidomethyl)	0.004283	37.55	0.0101256	3	1403.77	0.891307	0
lEEVLTNk	8	B2R983	N-Term(TMT10); K8(TMT10)	0.0001448	47.59	0.00231486	2	1403.85	0.228413	0	0.598044	8	10.019	1.05944	8	2.95646	0.953451	8	5.35551	1.06127	8	2.03776	1.0103	8	6.80529	1.17005	8	4.62356	0.991378	8	5.49712	1.08179	8	4.78001	1.06042	8	9.11545
tATQLAVNk	1	F8WAM2	N-Term(TMT10); K9(TMT10)	0.002353	31.89	0.084808	2	1403.86	-1.68423	0	0.807344	1		1.20608	1		1.01317	1		1.0055	1		0.899215	1		1.002	1		0.890752	1		0.968484	1		1.31664	1
tLLETLQk	5	Q584P1	N-Term(TMT10); K8(TMT10)	0.0001389	45.26	0.00143267	2	1403.89	1.1827	0	1.14528	5	0.416662	0.96971	5	2.45229	0.869237	5	3.27184	1.15929	5	1.40844	0.971266	5	6.88371	1.15996	5	7.34257	0.837107	5	5.44139	0.938884	5	5.94733	0.900451	5	3.66598
aPLPLGHIk	1	B4DVZ8	N-Term(TMT10); K9(TMT10)	0.002622	31.18	0.0359701	3	1403.91	-1.89954	0	0.724955	1		0.734106	1		1.13934	1		0.786337	1		2.00761	1		0.901357	1		1.08683	1		0.872665	1		1.09756	1
aHIPPLGLk	1	A5PKX5	N-Term(TMT10); K9(TMT10)	0.0006966	34.5	0.0153634	3	1403.92	3.12182	0	0.955762	1		1.09581	1		1.27626	1		1.04954	1		0.909706	1		0.922376	1		0.952688	1		0.927125	1		1.04868	1
gTTITLVLk	1	Q5CAQ5	N-Term(TMT10); K9(TMT10)	7.716e-05	35.43	0.0115999	2	1403.92	-1.17425	0	1.02547	1		1.00515	1		1.09886	1		1.05523	1		0.991256	1		1.06543	1		1.06732	1		0.990171	1		0.763445	1
sFNPNSPGk	19	P27169	N-Term(TMT10); K9(TMT10)	9.272e-05	49.8	0.000834038	2	1405.79	2.57504	0	0.933176	19	13.3295	0.786248	19	20.4762	0.839124	19	11.0712	1.14131	19	7.76677	0.816938	19	16.8224	1.10214	19	10.9092	1.23193	19	9.25142	1.14323	19	10.7397	1.09979	19	8.10532
yALSNSIGPVR	1	P14543;B4DM05	N-Term(TMT10)	1.225e-05	51.51	0.000602842	2	1405.8	1.37022	0
vLTPDAFVcR	12	P03952	N-Term(TMT10); C9(Carbamidomethyl)	0.002129	50.81	0.000624463	3	1406.77	2.23035	0	1.01223	12	4.48651	1.01516	12	6.49747	1.00258	12	6.06684	1.02734	12	6.39113	1.07554	12	6.32137	0.935386	12	5.70085	0.894987	12	10.2778	0.987751	12	5.08891	1.06469	12	4.09386
iISIMDEk	8	B2R950	N-Term(TMT10); K8(TMT10)	0.0009993	41.32	0.0068293	2	1406.83	0.58467	0	1.21074	8	5.8605	0.920246	8	5.3805	1.12021	8	7.41535	1.23364	8	0.161054	1.29731	8	6.84625	0.744388	8	7.16446	0.839195	8	6.64713	1.02505	8	4.62715	0.561996	8	6.32285
gYILVGQAk	6	B4E1D8;P04003	N-Term(TMT10); K9(TMT10)	3.047e-05	57.06	0.000305318	2	1406.88	0.0352301	0
nQEAcELSNN	3	O95445	N-Term(TMT10); C5(Carbamidomethyl)	0.0008479	40.24	0.000633979	2	1407.64	0.3734	0	0.456104	3	49.8325	1.16767	3	18.547	0.532882	3	9.4531	0.943628	3	3.40764	0.984923	3	1.47745	1.29392	3	1.49178	1.14931	3	1.77723	1.05997	3	7.7336	1.3217	3	15.0799
dVMEDAVEDR	2	M0R1A1	N-Term(TMT10)	0.001703	37.72	0.00219757	2	1407.66	1.55938	0	0.4192	2	0.993001	1.03578	2	2.28732	0.854395	2	10.8789	1.09427	2	5.51946	0.988968	2	2.26773	1.25342	2	10.785	1.06526	2	20.6084	1.01989	2	6.82933	1.30656	2	5.88105
tGYYFDGISR	8	P23142;B1AHL2;B4DUV1	N-Term(TMT10)	2.742e-05	42.71	0.00192887	2	1407.71	0.430443	0
sLGNIImVcR	1	A8K5T0	N-Term(TMT10); M7(Oxidation); C9(Carbamidomethyl)	0.001688	40.67	0.00757193	2	1407.77	1.93604	0	0.734239	1		1.60031	1		1.04689	1		1.25767	1		0.553934	1		1.05898	1		0.820271	1		0.93298	1		0.848013	1
qLYGDTGVLGR	4	P07360	N-Term(TMT10)	0.0002669	48.48	0.00135023	2	1407.78	-0.554951	0	1.02613	4	6.01616	0.99582	4	4.73987	1.27791	4	16.821	0.963526	4	1.53006	1.1053	4	21.366	0.831249	4	9.37563	0.938714	4	13.1253	0.981048	4	20.2256	1.02157	4	12.0412
vTISVDTSk	17	A0A120HG46	N-Term(TMT10); K9(TMT10)	2.224e-05	53.58	0.000357841	2	1407.85	1.242	0	1.12683	17	11.9577	1.11115	17	9.18284	1.56	17	5.91404	0.963814	17	9.37772	2.60221	17	10.8673	0.455334	17	21.1363	0.544785	17	16.058	0.401968	17	24.3514	0.410784	17	30.6802
lIASMSSDSLR	7	B2R6V9	N-Term(TMT10)	0.0001384	52.86	0.000328163	3	1408.77	0.819632	0	1.04425	7	2.73967	0.972993	7	9.54009	1.1133	7	12.0836	1.14989	7	2.49921	1.09159	7	9.24219	0.917786	7	8.12964	0.895937	7	13.7658	0.867868	7	10.7217	0.950358	7	6.48238
lcDNLSTk	72	P02774	N-Term(TMT10); C2(Carbamidomethyl); K8(TMT10)	0.0009629	45.03	0.00228786	2	1408.79	-0.103967	0	1.1094	72	6.26706	0.936381	72	5.35423	0.957592	72	7.87803	0.999586	72	5.33975	0.843417	72	8.12197	1.0018	72	6.79652	1.14835	72	6.60546	1.0306	72	5.16477	1.08568	72	6.9979
fVTQAEGAk	32	C0JYY2	N-Term(TMT10); K9(TMT10)	7.793e-06	51.73	0.000620065	2	1408.82	0.195056	0	1.1739	32	5.30501	0.908333	32	6.63514	0.944376	32	9.60303	1.10261	32	4.61495	0.903047	32	8.52132	1.08096	32	5.16366	1.02667	32	4.71401	0.98307	32	6.22409	0.964226	32	8.32514
qINDYVAk	9	P05154	N-Term(TMT10); K8(TMT10)	0.0009513	39.63	0.0100563	2	1408.82	0.0359578	0	1.15369	9	3.04004	1.0697	9	4.57843	1.08908	9	6.58282	0.617199	9	11.2498	0.8937	9	2.16926	1.07501	9	3.3927	1.29443	9	4.79201	1.08597	9	11.4454	1.13503	9	3.95121
dLLLPQPDLR	26	P02750;Q68CK4	N-Term(TMT10)	0.006964	45.44	0.00266185	2	1408.84	0.285449	0
gSTGTQLck	4	Q9UNH2	N-Term(TMT10); C8(Carbamidomethyl); K9(TMT10)	4.349e-05	42.46	0.00422537	2	1409.78	-1.58351	0	1.30653	4	7.45927	1.03122	4	0.477392	0.913987	4	9.03983	0.94981	4	3.14221	0.933948	4	3.90266	0.962297	4	2.28086	1.19195	4	13.4131	0.786815	4	2.48288	0.97722	4	4.73919
aIGPSQTHTIR	3	A0A0U1RR20	N-Term(TMT10)	0.0005077	29.81	0.0773615	3	1409.81	-0.0182782	0	1.01129	3	0.700977	0.943949	3	0.335189	1.07499	3	1.19941	0.944813	3	17.0294	1.3358	3	0.836931	0.868009	3	5.67309	1.04496	3	12.4725	0.84576	3	4.19438	1.03938	3	5.16146
rFNALQYLR	2	P51884	N-Term(TMT10)	0.0003861	36.88	0.0134659	3	1409.82	-0.509912	1	1.0782	2	0.154905	1.08586	2	8.68278	0.935394	2	4.42815	0.871062	2	5.90367	0.833671	2	4.15761	0.964458	2	0.0200045	1.3692	2	12.2526	1.16285	2	3.195	0.840348	2	0.0272282
dSEITFIk	15	P01031	N-Term(TMT10); K8(TMT10)	0.0006475	46.24	0.00149266	2	1410.82	0.183814	0	1.36037	15	3.99629	0.973174	15	9.29023	1.1187	15	7.16763	0.987045	15	5.59777	0.910573	15	7.82086	0.907383	15	6.46808	1.16333	15	8.49821	0.892093	15	8.43202	0.838	15	10.4904
vHLTPEEk	30	P68871;P02042;B3VL17	N-Term(TMT10); K8(TMT10)	0.002054	31.83	0.0438633	2	1410.83	-1.54633	0
eLPEHTVk	74	P02774	N-Term(TMT10); K8(TMT10)	0.001443	39.11	0.00793539	2	1410.84	0.270669	0	1.09649	74	8.08578	0.917448	74	7.13647	0.99381	74	9.3405	0.986297	74	6.50051	0.857522	74	9.6999	1.01692	74	6.79348	1.1184	74	9.97576	1.00462	74	7.3118	1.04659	74	8.68501
vPMMYGAGk	2	Q9UK55;B2RBZ5	N-Term(TMT10); K9(TMT10)	0.006202	22.67	0.359872	2	1411.79	0.851892	0
lGEPIPISk	3	P16930	N-Term(TMT10); K9(TMT10)	0.002453	23.31	0.133698	2	1411.89	-1.05284	0	0.975652	3	13.9307	1.01611	3	0.790831	0.967373	3	7.53149	0.932677	3	6.21628	1.28299	3	8.24563	0.937036	3	0.833854	1.01875	3	6.84279	1.04154	3	10.1667	0.929609	3	1.34955
aLMDETmk	13	P02649;A0A0S2Z3V0	N-Term(TMT10); M7(Oxidation); K8(TMT10)	0.007152	35.49	0.0146753	3	1412.76	1.65203	0
lADGPGHck	18	O43866	N-Term(TMT10); C8(Carbamidomethyl); K9(TMT10)	0.001234	38.79	0.0075446	2	1412.77	-0.567301	0	1.12523	18	9.52515	1.26757	18	6.43989	1.18246	18	6.92763	1.25455	18	5.86492	1.2265	18	4.12376	0.690686	18	13.7334	0.766446	18	8.03427	0.693753	18	7.86831	0.724192	18	26.3646
fMETVAEk	50	P10909	N-Term(TMT10); K8(TMT10)	0.0003279	46.1	0.00149369	2	1412.79	0.0304653	0	1.00123	50	6.90837	0.847564	50	5.97423	0.837998	50	8.95597	0.949878	50	5.21736	0.784772	50	7.42238	1.11643	50	6.49221	1.29917	50	5.14616	1.1458	50	5.96141	1.16046	50	4.75137
sISAALEHk	25	C0JYY2	N-Term(TMT10); K9(TMT10)	1.127e-05	57.65	0.000102731	2	1413.84	-2.94974	0	1.2464	25	9.59663	0.936171	25	5.67112	0.977057	25	6.62909	1.10547	25	8.92989	0.966517	25	5.91384	1.0705	25	6.0586	1.0928	25	6.07667	0.608093	25	26.5188	1.05109	25	15.938
tGAVSGHSLk	4	P03952	N-Term(TMT10); K10(TMT10)	3.18e-05	55.08	0.000188136	2	1414.85	2.56656	0	1.03421	4	11.9404	1.0546	4	11.8178	0.94393	4	6.37359	1.08365	4	5.54616	0.951614	4	9.4271	1.0095	4	6.50349	0.920712	4	9.2857	0.920073	4	6.18377	1.04589	4	4.27584
eGMLSIMSYR	10	P01031	N-Term(TMT10)	1.491e-06	52.16	0.000195211	2	1415.72	-0.189114	0	1.23376	10	6.39511	0.974786	10	10.9672	1.07893	10	4.87742	1.00169	10	3.03885	0.872641	10	12.1403	0.853999	10	2.11188	1.23206	10	8.09299	1.02342	10	6.5969	0.88134	10	9.16649
fTTGDAMSk	5	Q14019	N-Term(TMT10); K9(TMT10)	4.401e-05	41.67	0.00415269	2	1415.76	0.273038	0	0.500701	5	8.78802	1.04095	5	2.49653	1.07767	5	2.72322	1.07098	5	3.2912	0.992416	5	6.43836	1.12149	5	5.48113	1.0029	5	1.15174	1.12597	5	5.85428	1.16479	5	0.880491
qVYGVYTk	2	Q6MZL2	N-Term(TMT10); K8(TMT10)	0.001218	30.52	0.0585079	2	1415.83	-0.433716	0	1.1902	2	3.06617	1.02081	2	5.81183	0.988416	2	3.42739	0.900456	2	4.54884	0.796212	2	2.68208	0.917327	2	0.568029	1.25622	2	4.42734	1.16104	2	9.76294	0.909727	2	4.41018
gEYFWEk	8	P04275;L8E853	N-Term(TMT10); K7(TMT10)	0.00355	31.44	0.04034	2	1416.76	-0.437899	0
sILFVPTSAPR	2	Q5CAQ5	N-Term(TMT10)	4.942e-05	51.02	0.000682751	2	1416.84	1.35085	0	1.0309	2	3.84103	0.955107	2	5.47045	1.07532	2	10.4212	1.03343	2	2.14657	0.946717	2	12.0454	0.923585	2	6.61357	0.994292	2	8.08551	1.20776	2	13.3767	0.854895	2	8.179
vAASIGNAQk	5	O00151	N-Term(TMT10); K10(TMT10)	2.095e-07	70.28	8.62088e-06	2	1416.86	-1.3388	0	0.533955	5	28.6021	0.959688	5	2.04733	0.951465	5	5.79402	0.948885	5	3.03482	0.907262	5	9.47251	1.33616	5	7.88645	1.0699	5	5.47195	1.02968	5	5.20852	1.41196	5	10.7062
kAVGGLGk	1	P81605	N-Term(TMT10); K1(TMT10); K8(TMT10)	0.00155	16.1	0.975747	3	1416.95	2.43259	1	0.99996	1		0.861427	1		0.860875	1		1.06401	1		2.37389	1		0.754026	1		0.71627	1		0.891348	1		0.472254	1
sPSQADINk	38	C0JYY2;Q7Z7Q0	N-Term(TMT10); K9(TMT10)	0.0001855	55.85	0.000200212	2	1417.81	1.51168	0
tAVNALWGk	1	P02042	N-Term(TMT10); K9(TMT10)	2.003e-05	50.11	0.000933065	2	1417.86	-0.30642	0	0.845633	1		1.28622	1		2.45718	1		1.26654	1		1.86413	1		0.298521	1		0.394314	1		0.498901	1		0.26192	1
dTTVIPVSk	6	Q6MZL2	N-Term(TMT10); K9(TMT10)	1.936e-05	58.89	0.000110141	2	1417.87	-0.652421	0	1.09268	6	10.4825	0.982228	6	5.52654	1.07972	6	16.0509	0.916113	6	7.72699	1.23193	6	9.69971	0.80813	6	11.2421	1.0791	6	12.1779	1.04489	6	4.9032	0.934484	6	15.6775
gLTSVINQk	3	P07195	N-Term(TMT10); K9(TMT10)	6.222e-06	60.07	7.24232e-05	2	1417.88	-0.479897	0	0.858842	3	1.08699	0.99314	3	0.127643	1.09234	3	3.91424	1.20318	3	4.19159	0.85995	3	17.6204	1.07901	3	4.44082	0.875681	3	15.6051	0.965527	3	4.11269	1.05587	3	6.95727
lSYTcEGGFR	33	P08603;A8K5T0	N-Term(TMT10); C5(Carbamidomethyl)	9.735e-06	40.26	0.00201093	2	1418.69	-0.313293	0
yGFYTHVFR	9	P00734	N-Term(TMT10)	0.0003235	36.69	0.0105859	3	1418.74	-0.106042	0	1.19709	9	6.70114	0.989274	9	4.4625	1.13327	9	14.4503	1.01545	9	4.37628	0.916779	9	27.6512	0.936024	9	10.7873	1.13767	9	9.56439	1.15879	9	7.66088	0.457347	8	28.3323
dSTLIMQLLR	1	P62258;P61981;P31946;Q04917;P27348;P63104	N-Term(TMT10)	1.407e-05	44.14	0.00351942	2	1418.82	0.506941	0
qVALWDTk	4	P31146	N-Term(TMT10); K8(TMT10)	0.0007617	41.17	0.00632456	2	1418.84	2.61813	0	0.495454	4	6.75397	1.02602	4	1.27469	1.0255	4	2.26415	1.09378	4	1.87821	0.890353	4	1.76147	1.22998	4	2.33961	0.907997	4	4.6083	1.01094	4	3.2215	1.38703	4	3.43104
qISLEGSVk	6	A8K2W3	N-Term(TMT10); K9(TMT10)	1.267e-05	52.68	0.000432957	2	1418.86	1.83545	0	0.689224	6	18.2131	0.951524	6	3.41503	0.957096	6	6.87821	1.08445	6	3.10846	0.932531	6	11.2882	1.16728	6	7.85698	1.0174	6	3.06164	1.01085	6	6.70653	1.27691	6	10.2802
qFTSSTSYNR	18	P02671	N-Term(TMT10)	4.042e-05	43.83	0.00104535	2	1419.7	-5.2469	0	1.19068	18	9.27264	1.08383	18	11.0876	1.3741	18	7.50345	0.988023	18	7.34262	1.24001	18	13.2574	0.732828	18	16.8745	1.0934	18	5.65021	0.731972	18	7.22608	0.71727	18	12.5969
scVSLNPGk	2	B9EJA8	N-Term(TMT10); C2(Carbamidomethyl); K9(TMT10)	0.0006618	31.73	0.058045	2	1419.8	0.671485	0	1.12513	2	15.587	0.977759	2	6.36915	1.06318	2	8.82761	0.940684	2	14.2883	0.867219	2	11.4384	0.809436	2	6.10387	1.31956	2	18.1727	0.949585	2	9.959	1.17897	2	12.6513
hHGPTITAk	12	P02760	N-Term(TMT10); K9(TMT10)	0.0003172	53.72	0.000322711	2	1419.84	-2.02652	0	1.23753	12	5.69487	1.0908	12	9.82281	1.24315	12	7.19553	0.866625	12	3.96835	1.11881	12	7.36319	0.878187	12	10.1658	1.15008	12	6.23795	0.514328	12	23.5262	1.29613	12	13.4148
hLVPGAPFLLQ	2	V9H0D6	N-Term(TMT10)	0.006599	29.17	0.0918844	2	1420.86	2.86662	0	1.10437	2	0.531003	1.05557	2	3.0819	1.27515	2	5.59006	0.951476	2	3.5174	1.16233	2	3.00118	0.951505	2	11.0966	0.91577	2	5.2405	1.01299	2	3.28585	0.667687	2	2.55034
dAQIFIQk	6	P04040	N-Term(TMT10); K8(TMT10)	0.0002701	40.35	0.00694235	2	1420.86	0.363085	0	1.04456	6	5.71018	1.00485	6	4.74203	1.4005	6	10.2963	1.11726	6	3.40446	1.16241	6	7.2026	0.777227	6	9.24942	0.840495	6	6.94161	0.873875	6	9.57044	0.873881	6	7.23652
iAPANADFAFR	11	B2R815	N-Term(TMT10)	9.29e-05	49.93	0.000582311	3	1421.77	-2.70726	0	1.17312	11	9.36172	0.95353	11	8.89681	1.00667	11	5.43652	0.960114	11	9.93909	0.913371	11	20.9631	1.028	11	4.81606	1.12302	11	9.42544	0.995663	11	7.82325	1.02733	11	12.4672
vTISLDTSk	6	A0A125U0V2	N-Term(TMT10); K9(TMT10)	0.0002952	54.19	0.000274558	2	1421.87	4.64625	0	1.09338	5	1.84865	1.14924	5	19.4454	1.88782	5	9.99731	1.23501	5	5.62839	2.15017	5	9.50816	0.396459	5	26.7752	0.446704	5	19.2682	0.346865	5	51.4703	0.279233	5	23.7656
aMANcQAAk	4	A8K430	N-Term(TMT10); C5(Carbamidomethyl); K9(TMT10)	4.384e-06	46.94	0.00118954	2	1422.76	1.71169	0	1.02366	4	6.85456	1.10438	4	8.39083	0.7103	4	4.01183	0.80493	4	0.228549	2.3869	4	2.60622	0.792123	4	4.05396	0.668557	4	1.09262	0.995065	4	1.46919	0.611033	4	10.9737
lIIYDVTk	5	S6BAR0	N-Term(TMT10); K8(TMT10)	0.0009102	38.77	0.00505737	2	1422.9	1.6364	0	1.70081	5	43.5634	1.07025	5	17.7339	1.25252	5	22.2069	1.14316	5	24.4347	1.77289	5	33.2984	0.428846	5	16.1285	0.450984	5	2.79512	0.347343	5	32.4125	0.283535	5	18.982
tFIEDVNk	19	C0JYY2	N-Term(TMT10); K8(TMT10)	0.0005927	41.32	0.00558225	2	1423.82	0.517529	0	1.23639	19	11.9834	0.648996	19	11.8937	0.87866	19	10.6067	1.18922	19	3.33333	0.864733	19	13.6116	1.14156	19	8.47702	0.939537	19	4.72477	1.18145	19	10.0957	0.744471	19	6.40787
lQVVPVAANQR	1	A0A140T8Z8	N-Term(TMT10)	5.627e-06	31.59	0.0448646	2	1423.86	0.171932	0	1.01723	1		1.06487	1		1.00202	1		1.08225	1		0.970091	1		0.95552	1		1.04013	1		0.947512	1		0.997547	1
wcALSHHER	27	Q53H26;B4E1B2	N-Term(TMT10); C2(Carbamidomethyl)	7.846e-06	48.36	0.000425974	3	1424.71	0.858007	0
dSGFQMNQLR	14	B4E1B2;Q53H26	N-Term(TMT10)	5.206e-06	48.27	0.000790106	2	1424.72	0.31207	0
lIASmSSDSLR	3	B2R6V9	N-Term(TMT10); M5(Oxidation)	0.002763	36.61	0.0164032	2	1424.76	-0.21629	0	1.09214	3	7.94292	0.924193	3	3.11354	1.01384	3	0.878217	1.11407	3	5.31285	1.01315	3	3.2039	1.01483	3	3.86413	0.914774	3	2.34499	0.901929	3	19.3278	1.05877	3	4.52734
sTGSWSTLk	28	B4E1Z4	N-Term(TMT10); K9(TMT10)	1.004e-05	57.01	0.00013228	2	1424.82	0.516647	0	1.00811	28	11.184	1.14003	28	8.06515	1.0845	28	8.1569	0.968681	28	4.37678	0.894047	28	12.3153	1.01229	28	11.5917	1.08836	28	7.12672	0.916637	28	6.2842	1.05752	28	12.8543
lVDPQGPLk	9	Q9Y6R7	N-Term(TMT10); K9(TMT10)	0.0006245	38.04	0.00906885	2	1424.89	-0.0227307	0	1.47579	9	11.5148	0.790063	9	25.1617	1.00815	9	20.6661	0.952641	9	14.6075	0.85252	9	15.5556	0.914712	9	8.54908	1.02207	9	8.63384	1.11327	9	7.85749	0.89775	9	13.22
aDGSYAAWLSR	36	P0C0L4;P0C0L5;Q9UNU2;A0A0G2JPR0	N-Term(TMT10)	1.11e-05	67.71	1.21908e-05	3	1425.74	2.47048	0
vTMSVDTSk	7	Q6GMX6	N-Term(TMT10); K9(TMT10)	0.0001039	56.01	0.000154502	2	1425.8	-0.406711	0	0.919047	7	10.4182	1.09428	7	7.67575	1.7414	7	8.10635	1.06974	7	7.1248	2.88192	7	13.765	0.34096	7	44.7105	0.477509	7	35.7482	0.381896	7	47.3876	0.31197	7	59.3551
yLTLNTESTR	10	A0A024CIM4	N-Term(TMT10)	6.878e-06	42.53	0.004599	2	1426.77	-0.499268	0	1.05526	10	4.68637	0.913629	10	6.08002	0.967576	10	12.2888	0.919478	10	2.49318	1.13434	10	6.87626	1.04585	10	6.15352	0.980925	10	4.94765	1.08565	10	7.64699	0.980118	10	8.2415
lMIYDVSk	2	Q5NV84	N-Term(TMT10); K8(TMT10)	0.0005279	39.83	0.00964006	2	1426.83	-2.54908	0	1.07511	2	1.62901	1.95769	2	9.67792	1.29692	2	3.09148	1.26877	2	2.36109	1.82002	2	10.7432	0.366378	2	25.9407	0.425978	2	18.8607	0.363108	2	58.6234	0.283676	2	7.14835
lLLNNDNLLR	2	A8K0T9;C9JUG7	N-Term(TMT10)	2.459e-05	40.47	0.00717943	2	1426.86	-1.30118	0
eLLALIQLER	8	Q16610	N-Term(TMT10)	1.524e-05	47.91	0.000618916	2	1426.89	1.76918	0	1.14684	7	1.32219	0.959627	7	4.49831	1.02795	7	1.99729	1.02622	8	6.2102	0.941933	8	7.56075	1.0246	7	4.91391	1.10871	7	4.34078	1.04973	8	4.77649	0.882464	8	5.70826
eELcTMFIR	6	C0JYY2;Q59HB3;E1B4S9	N-Term(TMT10); C4(Carbamidomethyl)	5.509e-05	52.04	0.000184426	2	1427.72	-0.617826	0
sFQTGLFTAAR	1	P07225;Q16519	N-Term(TMT10)	2.322e-06	39.1	0.0077876	2	1427.79	2.64206	0
vEYGFQVk	58	P0C0L4;P0C0L5;A0A0G2JPR0	N-Term(TMT10); K8(TMT10)	0.0001314	46.09	0.00152051	2	1427.83	-1.12803	0
qLALWNPk	2	B4DMH3	N-Term(TMT10); K8(TMT10)	0.002003	33.07	0.0243135	2	1427.88	-0.972821	0	0.48809	2	19.5454	0.943555	2	2.81288	1.09707	2	11.2731	1.03268	2	4.12653	0.98015	2	0.366421	1.18456	2	3.06219	0.906979	2	4.31859	1.11058	2	5.64949	1.34515	2	12.0479
dAGTIAGLNVLR	4	P11142	N-Term(TMT10)	3.328e-07	75.39	1.87316e-06	2	1428.84	-1.40718	0	0.688472	4	2.83266	0.94514	4	3.79975	1.04459	4	2.75487	1.04982	4	2.85941	0.954095	4	6.90416	1.13153	4	1.83387	0.957346	4	6.64293	0.987163	4	2.94525	1.32659	4	2.1571
qLAPIWDk	2	B4DNL5	N-Term(TMT10); K8(TMT10)	0.001755	32.3	0.0330341	2	1428.86	-0.125678	0	0.769822	2	21.4553	1.00481	2	1.71488	1.10441	2	8.61024	0.962815	2	9.41268	1.15103	2	7.99441	1.00836	2	1.27842	0.948077	2	2.52946	1.10833	2	1.33705	1.02832	2	19.2972
vLDALQAIk	4	P00915	N-Term(TMT10); K9(TMT10)	1.054e-05	54.47	0.000133977	2	1428.92	-0.143087	0	1.08408	4	1.40723	1.09646	4	2.3334	1.38265	4	2.15493	1.06821	4	4.07909	0.80231	4	6.46748	0.756117	4	3.13156	1.05239	4	8.8531	1.06658	4	8.95621	0.852293	4	2.63721
lTWASHEk	6	P06702	N-Term(TMT10); K8(TMT10)	0.0003017	39.94	0.0136371	2	1429.83	5.77382	0	0.633154	6	7.72507	1.11705	6	4.39496	1.529	6	12.6301	0.937722	6	8.16506	1.25538	6	4.35086	1.10856	6	6.43546	0.879601	6	6.27671	0.629671	6	9.25451	1.2234	6	3.97856
eILNINQk	20	B4E1Z4;A0A1U9X8W4	N-Term(TMT10); K8(TMT10)	0.0005213	47.01	0.00121232	2	1429.88	-1.75644	0
tQILVGVNk	3	A0A024CIM4	N-Term(TMT10); K9(TMT10)	8.261e-06	62.54	2.86951e-05	2	1429.92	0.539445	0	1.09888	3	4.58298	0.897691	3	2.08477	0.903468	3	5.71857	0.990682	3	2.2245	0.930366	3	7.35246	0.975528	3	0.752647	0.99498	3	19.5361	1.22756	3	3.31837	1.01182	3	5.52508
lTISEQNIQR	21	C0JYY2;Q7Z7Q0	N-Term(TMT10)	1.614e-06	60.76	5.58241e-05	2	1430.82	0.562644	0
sPELQAEAk	35	P02652	N-Term(TMT10); K9(TMT10)	0.0002888	55.79	0.000170175	2	1430.83	0.883772	0	0.843173	35	15.8239	0.744809	35	11.3179	0.709395	35	15.3016	1.39039	35	12.2792	2.35707	35	21.7126	0.683406	35	15.9582	0.750264	35	8.73655	0.716342	35	16.8454	0.718189	35	23.3275
dkGQAGLQR	23	P0C0L4;P0C0L5;A0A0G2JPR0	N-Term(TMT10); K2(TMT10)	0.004897	24.33	0.280607	2	1430.85	-0.146333	1
nVIGLQMGTNR	4	P37802	N-Term(TMT10)	1.343e-06	46.65	0.0016826	2	1431.79	-0.355268	0	0.521357	4	9.57403	0.968076	4	4.91761	0.677682	4	6.36039	1.13737	4	12.0203	1.13203	4	5.14355	1.1834	4	7.49482	0.974497	4	1.39974	1.03403	4	5.60911	1.16859	4	10.5272
iAQWQSLk	3	B2R950	N-Term(TMT10); K8(TMT10)	0.0007099	34.12	0.0327233	2	1431.87	-1.76319	0	1.20413	3	2.50045	0.934317	3	1.11868	1.0433	3	0.0536771	1.24828	3	0.599303	1.33025	3	3.89963	0.751482	3	13.3756	0.828646	3	6.30986	1.03479	3	7.75414	0.586934	3	20.8777
eYTDASFTNR	48	P00450	N-Term(TMT10)	2.054e-05	42.79	0.000954721	2	1432.69	-0.44273	0	0.982437	48	8.55884	0.98449	48	6.48844	1.0019	48	9.73037	0.944085	48	7.15591	0.986141	48	13.7625	1.02332	48	7.88726	1.06991	48	10.3501	0.998221	48	12.8966	1.09038	48	9.15071
iWMDHVScR	1	F5GZZ9	N-Term(TMT10); C8(Carbamidomethyl)	0.003006	14.67	0.776214	3	1432.71	1.86371	0	1.02075	1		0.911881	1		0.96781	1		1.1407	1		1.00062	1		0.86808	1		1.08625	1		1.06519	1		0.990591	1
fVcNSGYk	18	P08603;A8K5T0	N-Term(TMT10); C3(Carbamidomethyl); K8(TMT10)	0.0001222	49.23	0.000632217	2	1432.77	-0.172185	0
gMTNINDGLLR	13	Q06033	N-Term(TMT10)	3.135e-07	59.97	6.5803e-05	2	1432.78	-0.192452	0	1.02372	13	6.58268	0.949472	13	7.18421	1.17443	13	3.39482	0.947823	13	6.4491	0.96769	13	5.0909	0.91813	13	8.51268	1.14252	13	8.44576	0.97545	13	5.99094	1.04094	13	10.6516
yLDSTFTk	8	P12259	N-Term(TMT10); K8(TMT10)	0.000157	42.61	0.00490434	2	1432.81	-0.383975	0	1.06739	8	6.4014	0.827517	8	6.71472	1.00083	8	5.02358	0.90903	8	6.06006	0.939915	8	5.08341	0.962848	8	2.53315	1.35148	8	4.95087	1.03458	8	4.36749	1.14312	8	5.51352
hLEDVFSk	12	A8K1K1	N-Term(TMT10); K8(TMT10)	0.0008082	41.38	0.00687024	2	1432.82	-0.738387	0	1.0921	12	4.0927	0.878334	12	8.66335	1.03573	12	6.83274	1.03059	12	3.12206	0.906067	12	7.8132	1.00493	12	4.29511	0.924726	12	3.93508	1.0153	12	4.54787	1.19618	12	5.89779
vQMLLNEk	2	B2R7D2	N-Term(TMT10); K8(TMT10)	0.003258	38.13	0.0211189	2	1432.86	0.216156	0	1.10234	2	5.73485	0.982032	2	13.753	1.04362	2	5.74206	1.0055	2	5.11298	0.959868	2	23.3078	1.00259	2	7.21141	1.05899	2	6.03343	1.00283	2	2.17523	0.924626	2	13.0692
aMEAVAAQGk	3	P18669	N-Term(TMT10); K10(TMT10)	1.167e-05	61.09	7.30187e-05	2	1433.82	3.18344	0	0.673314	3	18.4518	0.963955	3	3.14451	0.956696	3	6.62039	1.06882	3	1.76301	0.916586	3	0.92573	1.5142	3	3.84653	1.00724	3	11.3977	0.930479	3	2.16296	1.13768	3	10.9945
sAATLQQEk	17	P23142	N-Term(TMT10); K9(TMT10)	4.064e-06	64.33	3.3743e-05	2	1433.84	0.097745	0	1.20465	17	6.08544	0.816086	17	7.95678	0.882374	17	7.94411	0.784842	17	11.2219	0.764834	17	12.3698	1.0327	17	6.58206	1.39526	17	15.1617	1.06509	17	7.33531	1.20356	17	7.43578
iDITLSSVk	1	B4DVE1	N-Term(TMT10); K9(TMT10)	4.151e-05	54.06	0.000295465	2	1433.9	1.53343	0	1.17075	1		1.04769	1		0.946717	1		1.10314	1		1.2392	1		0.754627	1		1.14307	1		0.859262	1		0.834444	1
tYSDHPEk	60	P00450	N-Term(TMT10); K8(TMT10)	0.001439	43.2	0.00279999	2	1434.76	0.206231	0	1.03876	60	8.50374	0.991308	60	8.00479	1.07616	60	8.71331	0.996217	60	5.31575	1.00752	60	12.4972	0.961785	60	7.73007	1.11998	60	9.28543	0.847602	60	23.0522	1.11172	60	9.57001
rEILGTck	4	A0A024QZN4;B4E3Q9	N-Term(TMT10); C7(Carbamidomethyl); K8(TMT10)	0.005508	10.41	8.13008	3	1434.85	0.110617	1
qLFDQVVk	6	E7EQR4;P26038	N-Term(TMT10); K8(TMT10)	0.000397	44.31	0.00307294	2	1434.87	1.19285	0
vASYGVkPR	12	B4E1Z4	N-Term(TMT10); K7(TMT10)	0.001745	27.68	0.12335	3	1434.88	0.0140438	0	0.954414	12	8.07829	1.00198	12	4.59658	1.02215	12	4.19185	0.992152	12	6.29453	0.8551	12	8.50757	0.994447	12	7.66018	1.0828	12	8.16297	1.10811	12	6.23774	1.13156	12	5.31666
dAAQcSGGDVAR	1	P40197	N-Term(TMT10); C5(Carbamidomethyl)	1.248e-05	51.43	0.000122306	2	1435.69	4.05184	0	0.428162	1		1.36244	1		0.450541	1		0.67266	1		1.36823	1		1.5189	1		0.81702	1		1.1222	1		1.30658	1
mMAVAADTLQR	4	A8K1K1	N-Term(TMT10)	0.0001288	54.52	0.000188423	3	1435.76	-1.82861	0	1.10356	4	3.16952	1.00635	4	3.93208	1.03013	4	1.27512	0.982024	4	7.4277	1.00648	4	17.0826	0.930539	4	6.5781	0.939756	4	7.91875	1.07176	4	6.43062	0.893181	4	7.51625
gDSGGPLSck	13	P03951	N-Term(TMT10); C9(Carbamidomethyl); K10(TMT10)	2.152e-05	57.48	0.000103795	2	1435.76	-0.811921	0	1.09273	13	4.40225	0.945903	13	4.01328	1.01656	13	7.81133	0.971024	13	4.58806	0.98464	13	7.09189	0.960349	13	6.14478	1.07571	13	3.69625	0.987609	13	4.17544	1.18345	13	4.80106
cLMQQGIk	1	Q86UX7	N-Term(TMT10); C1(Carbamidomethyl); K8(TMT10)	7.489e-05	51.25	0.000662906	2	1435.82	0.578842	0	0.415141	1		1.13239	1		0.80986	1		1.10643	1		0.934689	1		1.42971	1		1.09354	1		1.22524	1		0.727139	1
sSFVAPLEk	19	P36955	N-Term(TMT10); K9(TMT10)	1.462e-05	54.51	0.000281959	2	1435.86	-0.176021	0	1.22709	19	5.96062	1.03901	19	6.54407	1.09603	19	5.99987	0.881823	19	4.63473	0.824803	19	9.37187	0.95575	19	2.31137	1.06908	19	7.03422	1.03409	19	4.77651	1.01633	19	5.12542
iLGPLSYSk	5	P51884	N-Term(TMT10); K9(TMT10)	0.0001675	44.72	0.0026612	2	1435.89	-0.511228	0	1.0267	5	2.98111	1.07208	5	0.813585	0.941951	5	4.17806	0.904172	5	4.32224	0.851354	5	2.70263	1.08113	5	4.93308	1.27544	5	7.87975	1.11402	5	1.28321	0.908743	5	9.55374
vNDESTEGk	19	C0JYY2	N-Term(TMT10); K9(TMT10)	1.259e-05	44.26	0.00195173	2	1436.76	0.423392	0	1.17013	19	6.39798	0.884962	19	5.32717	0.942614	19	12.1899	1.07275	19	4.92038	1.00179	19	15.0976	1.13272	19	9.7658	1.00509	19	7.6697	0.982832	19	6.26695	0.919244	19	6.7749
dGAGDVAFVk	36	B4E1B2;Q53H26;C9JVG0	N-Term(TMT10); K10(TMT10)	2.706e-06	55.74	0.000220416	2	1436.81	-0.10326	0
aTAVVDGAFk	9	B4DF70	N-Term(TMT10); K10(TMT10)	8.238e-07	63.93	3.21233e-05	2	1436.85	-0.190335	0	1.06883	9	3.3998	0.942279	9	4.11345	1.46048	9	4.62374	1.01307	9	4.36562	0.86627	9	4.94009	0.770053	9	4.1232	1.0219	9	2.37361	1.10791	9	4.93241	0.963912	9	6.22226
wNPcLEPHR	11	P43251	N-Term(TMT10); C4(Carbamidomethyl)	0.0006977	40.32	0.00333963	3	1437.73	1.00317	0	1.03315	11	6.7934	0.92809	11	11.7276	0.968784	11	9.27032	1.05842	11	9.74256	1.0013	11	23.6358	1.06321	11	12.0101	0.936153	11	16.5744	1.02911	11	10.1001	1.06673	11	9.08353
vNFAMNVGk	1	P14618	N-Term(TMT10); K9(TMT10)	3.11e-05	43.43	0.0031617	2	1437.83	1.2023	0	0.500288	1		1.15174	1		0.940165	1		1.02717	1		0.806534	1		1.13166	1		0.92655	1		1.21975	1		1.32239	1
lPGFDScGk	8	Q14520	N-Term(TMT10); C7(Carbamidomethyl); K9(TMT10)	0.005505	30.4	0.0570919	3	1438.78	1.04913	0	1.26046	8	5.2269	0.941784	8	6.25713	1.10617	8	8.03139	1.02066	8	2.18815	0.942719	8	12.0985	0.882441	8	5.43843	1.0225	8	4.01202	0.97867	8	2.17043	1.01432	8	11.9855
iGHPAPNFk	1	A0A0A0MSI0	N-Term(TMT10); K9(TMT10)	0.0005684	33.2	0.0320443	3	1438.86	0.435	0	0.68937	1		0.89304	1		1.16476	1		1.05699	1		0.816171	1		1.03476	1		1.03714	1		1.05463	1		1.4265	1
wSSTSPHRPR	2	P00747	N-Term(TMT10)	0.00614	20.04	0.731234	4	1439.77	0.237141	0	1.08829	2	6.96666	0.992818	2	16.1924	1.1343	2	7.91575	0.969597	2	9.33206	1.01752	2	1.13591	1.10656	2	14.4036	1.12054	2	1.99928	0.446278	2	90.6334	1.37169	2	6.46752
lEYPTcAk	20	P08603;A8K5T0;B1AKG0	N-Term(TMT10); C6(Carbamidomethyl); K8(TMT10)	0.002184	30.7	0.0708998	2	1439.8	0.447042	0
lPPNVVEESAR	79	P01023	N-Term(TMT10)	0.002831	60.05	8.38787e-05	2	1439.81	1.50267	0	1.39143	79	22.801	1.21023	79	17.9541	1.24865	79	14.1457	1.46947	79	22.4909	1.56855	79	16.1073	0.553666	76	57.7082	0.52595	77	57.9536	0.548726	73	72.2468	0.55613	67	68.1206
vTMSIDTSk	3	A2NYU7	N-Term(TMT10); K9(TMT10)	0.0001284	33.51	0.0372346	2	1439.82	1.3603	0	1.10572	3	0.185531	1.23213	3	6.31148	1.87174	3	1.81771	0.818519	3	2.71748	2.39549	3	11.1942	0.507442	3	24.2459	0.553337	3	6.54857	0.394989	3	12.3841	0.484214	3	5.07107
dFAEHLLIPR	10	P22891	N-Term(TMT10)	3.661e-05	63.01	4.18529e-05	3	1439.82	1.41464	0	0.991114	10	8.6703	0.878406	10	7.0461	0.984931	10	4.73896	1.09507	10	6.29574	1.01902	10	10.9627	0.956081	10	4.86146	1.06051	10	10.895	0.989726	10	5.87601	1.06198	10	3.73402
qITVNDLPVGR	6	A0A0A0MSI0;B4DF70	N-Term(TMT10)	3.622e-05	40.71	0.0053923	2	1440.84	0.560087	0
lMIYEVSk	5	A2MYD6	N-Term(TMT10); K8(TMT10)	0.0007741	38.71	0.00779926	2	1440.85	-2.03331	0	1.12692	5	9.05559	1.16743	5	6.85643	1.42574	5	6.50045	1.12013	5	3.87495	2.25124	5	7.97226	0.45935	5	17.5877	0.614925	5	6.27601	0.522781	5	29.3352	0.419064	5	14.6927
nSEEFAAAMSR	17	C0JYY2;Q7Z7Q0	N-Term(TMT10)	1.761e-07	60.3	1.91317e-05	2	1441.69	0.268051	0
aIFYMNNPSR	1	Q9UGM5	N-Term(TMT10)	0.0002248	40.83	0.00375021	2	1441.74	-1.41441	0	1.11642	1		0.96056	1		1.1615	1		0.985941	1		0.867368	1		0.919499	1		1.14418	1		1.08485	1		0.90011	1
nWAcFTGk	1	I3V9V3	N-Term(TMT10); C4(Carbamidomethyl); K8(TMT10)	0.007044	18.06	0.8738	2	1441.77	0.686805	0	0.965412	1		1.00925	1		0.943295	1		1.00294	1		0.881034	1		1.00123	1		0.942869	1		1.28472	1		0.97187	1
mGLAFESTk	17	C0JYY2;Q7Z7Q0	N-Term(TMT10); K9(TMT10)	2.147e-05	46.35	0.00144605	2	1441.81	0.411045	0
tYNVLDMk	36	P0C0L4;P0C0L5;A0A0G2JPR0	N-Term(TMT10); K8(TMT10)	0.0004913	53.17	0.000283144	2	1441.81	0.00159435	0
wLQGSQELPR	48	Q96K68;Q8NCL6;Q6MZW0;Q6ZVX0;Q7Z379;Q9NPP6;Q6P089;Q6ZW64;Q6N041;P0DOX2	N-Term(TMT10)	8.333e-07	63.27	2.80467e-05	2	1442.79	-1.38671	0
tYETTLEk	29	P02768;F6KPG5	N-Term(TMT10); K8(TMT10)	0.0001349	46.35	0.00159321	2	1442.81	-0.0337652	0
gLcVATPVQLR	15	P0C0L4;P0C0L5;A0A0G2JPR0	N-Term(TMT10); C3(Carbamidomethyl)	7.555e-06	59.56	7.38671e-05	2	1442.84	0.157639	0
tVAAcNLPIVR	31	P02760	N-Term(TMT10); C5(Carbamidomethyl)	1.306e-05	61.98	4.19305e-05	3	1442.84	-0.0420404	0	1.1122	30	7.75893	0.899483	31	7.42214	1.00979	31	12.0875	1.00863	31	5.02151	0.978049	30	9.41061	0.882612	30	6.03436	1.14591	31	6.46617	1.019	31	8.6127	1.07748	31	10.4744
lTLEQIDLIR	1	A0A024R6Y5	N-Term(TMT10)	0.004167	22.2	0.285011	2	1442.88	1.63935	0	1.00037	1		0.975757	1		1.13341	1		0.928573	1		1.3494	1		0.82371	1		1.1237	1		0.937282	1		0.943865	1
iYHPNVDk	3	P61088	N-Term(TMT10); K8(TMT10)	0.00461	26.47	0.14878	3	1443.84	-0.198964	0	0.858243	3	4.54235	1.00816	3	3.49211	1.04287	3	3.05442	0.966169	3	2.08042	0.985575	3	0.718301	0.990195	3	8.84229	0.97647	3	9.35356	0.97419	3	6.6162	1.2231	3	2.29119
hcLVTVEk	17	P07225;Q16519	N-Term(TMT10); C2(Carbamidomethyl); K8(TMT10)	0.0001854	41.6	0.00448652	2	1443.84	2.09547	0
lVVLGSGGVGk	1	F5H6R7	N-Term(TMT10); K11(TMT10)	4.986e-07	52.48	0.000289248	2	1443.93	2.27839	0	0.687556	1		0.90897	1		0.970087	1		0.990971	1		0.982392	1		1.11204	1		0.922544	1		1.29846	1		1.16724	1
wcNEHLk	4	P21333	N-Term(TMT10); C2(Carbamidomethyl); K7(TMT10)	0.007768	22.26	0.381536	2	1444.78	2.35737	0	0.566318	4	21.4608	1.0489	4	3.05718	1.43182	4	7.45764	0.856365	4	0.601049	0.702291	4	13.4751	1.26546	4	0.668393	0.864144	4	18.4709	0.679396	4	5.14858	1.87723	4	16.1937
aLVQQMEQLR	19	P06727	N-Term(TMT10)	4.35e-06	45.52	0.00207602	2	1444.81	-0.108469	0	1.15435	19	7.36215	0.942091	19	8.74647	1.04134	19	9.20492	0.843398	19	13.8583	0.855082	19	7.02918	1.00878	19	6.53308	1.17164	19	8.56874	1.14098	19	6.58322	1.0265	19	7.48061
vDNHLFNk	2	P48426	N-Term(TMT10); K8(TMT10)	0.001762	21.7	0.446553	3	1444.83	0.251499	0	0.667431	2	22.0072	1.00304	2	1.37675	0.936917	2	23.7072	1.04616	2	11.8989	0.855911	2	13.2846	1.10871	2	4.24842	0.949943	2	5.97665	1.08047	2	1.81793	1.41274	2	9.76124
lASDLLEWIR	5	O43707;P12814	N-Term(TMT10)	0.00132	51.35	0.000485496	3	1444.83	-1.23062	0
vVLGDQDLk	14	Q14520	N-Term(TMT10); K9(TMT10)	9.651e-05	49	0.000847886	2	1444.88	-1.17879	0	1.20209	14	3.59178	0.944453	14	11.3124	1.00962	14	10.5359	1.00363	14	2.34906	0.92017	14	12.0179	0.900205	14	6.51187	0.971997	14	7.74876	1.02673	14	7.98002	1.02208	14	8.39929
iTLLSALVETR	20	P01011	N-Term(TMT10)	1.218e-06	63.52	2.68335e-05	2	1444.9	1.11286	0	1.04369	19	5.51128	1.05064	19	6.93195	1.15221	19	6.54619	0.954851	20	5.50652	0.9219	19	7.13225	0.91088	19	7.69349	1.26228	19	9.2145	1.01348	19	4.52949	0.921815	18	10.6078
lScAASGFTFR	1	Q6MZQ6;Q6N094	N-Term(TMT10); C3(Carbamidomethyl)	0.00174	24.04	0.127015	2	1445.74	-0.263661	0
vVDVLDSIk	5	P00918	N-Term(TMT10); K9(TMT10)	2.276e-05	55.59	0.000159423	2	1445.9	-0.512418	0	0.759223	5	2.46292	0.97232	5	1.86788	1.22307	5	3.55948	1.18709	5	0.376946	0.759669	5	4.35102	1.06677	5	4.45908	0.933971	5	3.10783	1.02996	5	6.17959	1.14989	5	0.693247
kPGESLk	4	A0A0C4DH38;A0A0X9UWK7;A0A0F7TAV4;A0A125QYY4	N-Term(TMT10); K1(TMT10); K7(TMT10)	0.006924	12.24	2.10156	3	1445.93	-0.154153	0
cSGPGLSPGMVR	2	P21333	N-Term(TMT10); C1(Carbamidomethyl)	5.475e-05	46.46	0.000819045	2	1446.74	1.35157	0	0.730386	2	9.70147	1.12605	2	7.33042	1.28429	2	10.1825	0.826856	2	5.34643	0.754199	2	8.44274	1.20206	2	1.98134	1.09113	2	6.37708	0.778757	2	12.4369	1.54699	2	2.81704
vMNHIcSk	7	P43652	N-Term(TMT10); C6(Carbamidomethyl); K8(TMT10)	0.0003325	32.83	0.0365879	2	1446.8	0.675588	0	1.20511	7	9.92009	0.873842	7	3.68614	1.01608	7	3.55561	0.887147	7	12.9324	0.92911	7	7.92227	0.996456	7	9.26094	1.19167	7	14.6651	0.798435	7	12.892	1.32109	7	6.87877
nIAAFGGNPk	5	A0A024CIM4	N-Term(TMT10); K10(TMT10)	4.349e-05	48.37	0.00137905	3	1446.85	1.61215	0	0.93881	5	22.7341	0.990875	5	3.46909	0.905659	5	2.48162	0.963016	5	3.01836	1.00895	5	12.7907	1.09636	5	4.79534	0.969988	5	13.6951	1.14767	5	6.18527	1.01666	5	3.27908
iTIxPDTSk	8	A2N0U2	N-Term(TMT10); X4(N); K9(TMT10)	0.002204	32.62	0.0496143	2	1446.86	-0.0817276	0	1.30236	4	2.42981	1.32344	4	8.23433	1.15933	4	4.16475	1.10779	4	12.908	2.02775	4	9.85747	0.519325	4	18.6667	0.636504	4	17.7684	0.480699	4	19.9566	0.410211	4	53.8251
iIGGSDADIk	19	A8K2N0	N-Term(TMT10); K10(TMT10)	4.969e-05	61.6	6.26107e-05	3	1446.86	0.0849867	0	1.20114	19	3.56195	0.97565	19	6.87465	0.990667	19	6.49332	0.969873	19	4.60715	0.899941	19	9.65559	0.986056	19	4.46712	1.16206	19	6.85488	1.07494	19	6.71161	0.873511	19	7.22943
cLVNLIEk	23	B4E1Z4	N-Term(TMT10); C1(Carbamidomethyl); K8(TMT10)	0.0004861	51.52	0.000612731	2	1446.88	0.285298	0	0.977445	23	6.33765	1.17246	23	3.52532	0.968625	23	5.87363	0.931811	23	4.35983	0.814018	23	7.04267	1.04714	23	4.96561	1.07036	23	3.02602	1.02128	23	7.97708	1.06776	23	8.1253
aLGDLISATk	6	Q9Y490	N-Term(TMT10); K10(TMT10)	7.206e-06	52.22	0.000455241	2	1446.89	-0.0132869	0	0.482414	6	21.1908	1.06153	6	0.637475	0.98736	6	2.8283	1.1143	6	1.74463	0.775781	6	7.78024	1.1757	6	3.99411	0.981261	6	7.50661	1.02004	6	1.8646	1.41284	6	4.01848
aYVPIAQVk	2	B4DLJ7	N-Term(TMT10); K9(TMT10)	0.0001104	43.07	0.00397991	2	1446.91	1.26519	0	1.33426	2	12.1327	0.940446	2	4.44188	1.35823	2	6.04846	1.01585	2	8.15112	1.60077	2	34.19	0.655611	2	30.0736	0.883587	2	15.9143	0.663926	2	29.4087	0.675992	2	20.7469
gkSAGLVk	2	B2RMS9;B7ZKJ8;B7Z8Q7;B7Z544	N-Term(TMT10); K2(TMT10); K8(TMT10)	0.003258	17.16	1.01058	2	1446.96	1.82134	1
nVIGLQmGTNR	1	P37802	N-Term(TMT10); M7(Oxidation)	0.003009	27.42	0.130869	2	1447.79	1.47461	0	0.625547	1		0.857038	1		0.732077	1		0.936938	1		0.800773	1		1.02521	1		0.867291	1		1.02568	1		2.4177	1
gDSGGPLVck	20	P03952	N-Term(TMT10); C9(Carbamidomethyl); K10(TMT10)	2.582e-06	58.18	0.00011541	2	1447.8	-0.0553522	0	1.09751	20	6.77333	1.00327	20	5.84365	1.01728	20	5.95961	0.832619	20	2.36045	1.05272	20	7.08492	0.982381	20	10.7271	0.990589	20	2.65061	1.05934	20	8.03086	1.11787	20	7.99727
sGTSASLAISGLR	6	Q8NEJ1;S6BGD6	N-Term(TMT10)	6.609e-11	70.33	8.09586e-06	2	1448.83	1.08887	0
aGVETTTPSk	44	Q8NEJ1;S6BAR0;Q6GMX4;Q6GMV8;S6BGD6;Q6IN99;Q5FWF9	N-Term(TMT10); K10(TMT10)	3.51e-05	59.02	0.000109462	2	1448.83	-5.06778	0
wADLSGITk	12	B2R815	N-Term(TMT10); K9(TMT10)	4.684e-05	57.33	0.000167359	2	1448.85	0.576422	0	1.24986	12	5.72813	1.00434	12	6.14758	0.989362	12	9.81658	0.938839	12	4.71748	0.777984	12	10.7616	0.982413	12	10.3083	1.13802	12	3.53726	1.017	12	4.75775	1.10966	12	9.61712
nFPSPVDAAFR	98	P02790	N-Term(TMT10)	0.006255	46.47	0.00234328	2	1449.77	0.338956	0	1.11407	98	8.94465	1.02599	98	7.75318	0.998823	98	13.3393	0.990699	98	6.53739	0.891081	98	14.7705	0.935194	98	9.76459	1.10571	98	11.7956	0.999633	98	9.42512	1.02734	98	14.1501
eNLLDFIk	2	B4DNL5	N-Term(TMT10); K8(TMT10)	0.0001952	38.72	0.00962762	2	1449.87	1.07134	0	0.668833	2	16.2927	0.948833	2	8.99846	1.01196	2	7.17802	1.08029	2	5.17087	0.977185	2	24.7445	1.12	2	16.2247	0.896274	2	13.3084	1.03859	2	2.40744	1.29416	2	18.4279
tFYScTTEGR	25	A0A024R462	N-Term(TMT10); C5(Carbamidomethyl)	2.365e-05	48.41	0.000176659	2	1450.68	0.0634035	0	1.15037	25	9.16382	0.820912	25	11.5753	0.952516	25	9.08516	0.884976	25	2.98373	1.14142	25	10.5328	1.01386	25	6.18546	1.33577	25	10.732	1.04619	25	6.31886	0.869484	25	5.26072
tDASDVkPc	63	D9IWP9	N-Term(TMT10); K7(TMT10); C9(Carbamidomethyl)	0.0007373	33.49	0.309258	2	1450.76	-1.99959	0	1.24947	63	7.80978	0.997899	63	8.45337	0.967095	63	7.44403	0.943986	63	6.32881	0.902718	63	14.2182	0.98749	63	6.75412	1.14689	63	7.84941	0.844269	63	8.13557	1.10947	63	10.2747
tPENFPck	38	P00747	N-Term(TMT10); C7(Carbamidomethyl); K8(TMT10)	0.006914	23.49	3.12437	3	1450.78	-0.593406	0	1.07715	38	5.12499	0.95269	38	5.32093	0.967856	38	7.35761	1.00577	38	4.34925	0.849293	38	8.49158	0.972108	38	5.8064	1.11795	38	4.10637	1.01725	38	7.48673	1.15887	38	7.21425
qALEEFQk	34	B7Z550	N-Term(TMT10); K8(TMT10)	0.0003688	42.55	0.00463624	2	1450.83	-0.189847	0	1.046	34	4.97892	0.968728	34	4.21204	0.994263	34	5.66976	0.937149	34	3.93447	0.847579	34	7.17197	0.909927	34	5.15957	1.15418	34	4.44786	1.1217	34	4.4927	1.18997	34	5.15857
lLIYDNNk	7	Q8TE63;A2NV54	N-Term(TMT10); K8(TMT10)	0.002042	26.32	0.193327	2	1450.87	-1.27882	0
fGLLDEDGk	27	P0C0L4;P0C0L5;B7Z1F8;A0A0G2JPR0	N-Term(TMT10); K9(TMT10)	7.333e-05	45.4	0.00210679	2	1451.82	0.300159	0
dNELLVYk	26	P02743	N-Term(TMT10); K8(TMT10)	0.0009484	45.54	0.00198131	2	1451.85	0.14367	0	1.17042	26	3.20102	0.97833	26	2.62409	1.15763	26	6.04299	0.999067	26	2.40001	0.864656	26	4.27713	0.893007	26	5.67723	1.04891	26	3.86371	0.964323	26	3.89431	1.09181	26	5.5333
lGELTDLHGLR	1	K7EQ37	N-Term(TMT10)	0.000126	24.15	0.278829	3	1452.84	-0.273009	0	0.832015	1		1.01925	1		1.10705	1		0.958419	1		1.0857	1		1.05436	1		0.987893	1		0.980509	1		1.13153	1
iGNFSTDIk	5	P13796	N-Term(TMT10); K9(TMT10)	9.803e-05	36.64	0.015033	2	1452.85	0.297338	0	1.03838	5	2.70056	0.927224	5	3.94227	1.04111	5	6.38881	1.0252	5	2.68241	1.06193	5	7.18448	0.915317	5	3.48909	1.04421	5	4.3035	1.02888	5	1.13046	0.947489	5	2.08274
nAYVWTLk	1	O15143	N-Term(TMT10); K8(TMT10)	0.001179	33.53	0.0272819	2	1452.87	3.41902	0	0.842102	1		1.0205	1		1.11951	1		1.0669	1		1.05751	1		0.89994	1		0.925068	1		1.29777	1		0.744163	1
lQGEIAHVk	7	P35908	N-Term(TMT10); K9(TMT10)	0.0004664	37.3	0.00864008	2	1452.9	1.29689	0	0.701458	7	20.2225	0.96843	7	7.0377	0.956324	7	6.6988	0.680054	7	5.47397	0.608497	7	18.5784	0.969756	7	5.48326	1.36301	7	3.54157	1.81732	7	14.7257	0.904121	7	9.02702
aLSGFSLQScR	1	P03951	N-Term(TMT10); C10(Carbamidomethyl)	4.185e-05	39.69	0.00547735	2	1454.76	-1.42002	0	0.836212	1		0.903293	1		1.19186	1		0.884769	1		1.46816	1		0.951396	1		0.93265	1		1.01783	1		1.01441	1
vLANPGNSQVAR	1	B2RBR9	N-Term(TMT10)	0.003565	29	0.0797529	2	1454.83	0.288212	0	0.597321	1		0.995567	1		1.08618	1		1.09408	1		0.866657	1		1.20289	1		0.966447	1		0.791961	1		1.58364	1
iQASTMAFk	3	P37802	N-Term(TMT10); K9(TMT10)	4.953e-05	36.72	0.0132583	3	1454.84	0.0320419	0	0.654141	3	2.90908	0.935971	3	9.88946	1.09457	3	7.86676	1.10817	3	0.675023	1.04096	3	19.575	1.07795	3	7.06196	0.885555	3	1.3672	0.997778	3	18.3569	1.14997	3	16.495
lVEIAQVPk	1	Q53QE9	N-Term(TMT10); K9(TMT10)	5.09e-05	46.35	0.000546905	2	1454.93	-1.24842	0	0.487265	1		0.943324	1		0.95903	1		1.05171	1		1.11239	1		1.1651	1		1.00413	1		1.00254	1		1.39867	1
rQDGSVDFFR	6	O75636	N-Term(TMT10)	0.0001046	40.68	0.00296708	3	1455.75	-0.173012	1	1.03873	6	10.0287	1.18035	6	4.42993	0.909902	6	11.2848	0.986575	6	6.49164	0.795333	6	4.35891	1.13198	6	6.45035	1.18504	6	6.64701	0.984876	6	8.5978	0.807565	6	11.2268
eEILMHLWR	3	A8K1K1	N-Term(TMT10)	1.644e-05	63.98	2.52165e-05	3	1455.8	1.13543	0	1.20195	3	0.551148	0.818231	3	0.777067	1.17586	3	3.18282	1.07667	3	2.30262	0.816153	3	15.8925	0.864926	3	0.640748	0.805147	3	4.47916	1.24197	3	9.9032	0.958402	3	6.60441
aAAATGTIFTFR	2	P05154	N-Term(TMT10)	8.812e-06	39.47	0.00751314	2	1455.82	1.87918	0	1.03918	2	31.3244	0.855331	2	36.9214	1.00296	2	45.9314	0.607501	2	10.7676	1.62616	2	35.7622	1.02496	2	37.9023	0.869243	2	27.3955	1.20509	2	15.5712	0.784662	2	16.2653
dGLAFNALIHR	1	O43707	N-Term(TMT10)	5.322e-05	46.55	0.00138982	3	1455.82	-1.98683	0	0.781391	1		0.888302	1		1.05457	1		1.1498	1		1.0062	1		1.19835	1		1.01621	1		0.9279	1		1.0357	1
yMDGMTVGVVR	9	P23142	N-Term(TMT10)	0.0001409	44.62	0.00127531	2	1456.75	0.0190398	0	1.06052	9	9.95907	0.915857	9	6.8695	0.912561	9	4.92745	0.835381	9	10.1579	0.920931	9	14.1165	1.03795	9	6.77459	1.27242	9	11.9788	1.1778	9	5.57626	1.04526	9	3.57947
dLTDYLMk	12	P60709;P63261;A8K3K1;Q13707;Q562R1	N-Term(TMT10); K8(TMT10)	0.0009675	38.15	0.00926308	2	1456.81	0.395685	0
kTHSLcPR	2	A5YAK2	N-Term(TMT10); K1(TMT10); C6(Carbamidomethyl)	0.00422	20.83	1.08541	2	1456.85	1.2318	1	0.882143	2	2.04625	0.779985	2	6.98441	0.617727	2	17.7147	1.86109	2	3.40322	0.857762	2	6.80666	1.0613	2	2.89361	0.635146	2	6.11732	0.734387	2	3.77823	1.22735	2	1.13656
iSFDEFIk	1	P13796	N-Term(TMT10); K8(TMT10)	0.0005322	27.96	0.213701	2	1456.85	3.62162	0	1.07406	1		0.967046	1		0.942961	1		0.972586	1		0.856232	1		0.983508	1		1.21808	1		1.07253	1		1.05383	1
tYNVLDmk	31	P0C0L4;P0C0L5;A0A0G2JPR0	N-Term(TMT10); M7(Oxidation); K8(TMT10)	0.004767	35.09	0.0206133	2	1457.81	2.40112	0
qAYTQFGGk	1	H0YMZ1	N-Term(TMT10); K9(TMT10)	8.006e-05	35.94	0.0175477	2	1457.82	-0.0563544	0	0.814861	1		1.01898	1		1.07563	1		1.19126	1		1.15437	1		0.945141	1		0.952346	1		0.881862	1		1.01504	1
nNLFTSSAGYR	2	E7ENL6	N-Term(TMT10)	1.123e-06	42.52	0.00221944	2	1458.76	2.04985	0	1.25943	2	9.81864	1.0726	2	0.641971	1.06701	2	2.84803	0.88896	2	3.08709	0.936983	2	12.3839	0.925996	2	3.33784	1.15297	2	0.808238	0.977648	2	0.701324	0.89279	2	4.47054
yLGEEYVk	30	Q53H26;B4E1B2	N-Term(TMT10); K8(TMT10)	0.0001653	41.23	0.00552586	2	1458.82	-0.0595554	0
iPTISTQLk	8	A0A024QZN4	N-Term(TMT10); K9(TMT10)	2.965e-05	52.53	0.000278956	2	1458.93	-2.76957	0	0.696699	8	18.4402	0.979777	8	2.39364	0.913797	8	17.2334	1.14259	8	4.38008	1.03392	8	22.2056	1.04739	8	4.48808	0.854485	8	16.9027	1.05636	8	5.22702	1.25884	8	9.03434
qTALVELVk	30	P02768;F6KPG5	N-Term(TMT10); K9(TMT10)	5.201e-06	57.59	8.54356e-05	2	1458.93	-0.0152657	0
qWNVNWDIR	1	Q86UX7	N-Term(TMT10)	0.0005677	41.99	0.00280475	2	1459.76	-1.56241	0	0.717426	1		1.17214	1		1.02108	1		1.09964	1		1.03511	1		1.12193	1		0.969568	1		0.999499	1		0.858047	1
dYPLIPVGk	6	P04040	N-Term(TMT10); K9(TMT10)	0.0009583	39.83	0.00803338	3	1459.89	1.09072	0	1.0502	6	4.16364	0.907765	6	2.13119	1.28366	6	6.47211	1.11723	6	3.13985	0.915856	6	4.34008	0.907523	6	1.78508	0.961879	6	3.91862	1.00898	6	4.70762	0.962772	6	3.26377
ycTDTGVLFR	2	J3K000	N-Term(TMT10); C2(Carbamidomethyl)	1.368e-05	32	0.0219889	2	1460.74	0.981459	0	0.961276	2	3.74268	1.01158	2	2.30413	0.896705	2	0.517775	1.05679	2	0.774263	0.954887	2	0.869269	1.04514	2	1.5962	1.09355	2	7.67933	0.992662	2	5.00789	1.05659	2	15.5391
aQQELEEQTR	2	P26038	N-Term(TMT10)	9.093e-06	38.36	0.00608326	2	1460.75	-0.15566	0	0.574543	2	41.8466	1.13997	2	14.2696	0.767466	2	6.50275	0.998661	2	13.4295	1.02643	2	7.45844	1.2324	2	1.07115	0.919153	2	3.67629	1.01287	2	14.4365	1.33059	2	17.6502
lYYGDDEk	16	P07357	N-Term(TMT10); K8(TMT10)	0.0008977	38.29	0.00680476	2	1460.77	0.185124	0	1.07901	16	6.12069	0.943792	16	5.12993	1.01367	16	7.02167	0.943705	16	3.80397	0.893644	16	9.27715	0.8679	16	8.36264	1.17078	16	8.1627	1.12992	16	4.48461	1.1462	16	8.34463
eQQDSPGNk	22	P08697	N-Term(TMT10); K9(TMT10)	0.0008919	43.71	0.00201946	3	1460.77	0.240418	0	1.07396	22	5.8115	0.92214	22	4.77288	0.99023	22	9.15081	1.0445	22	4.16565	0.983305	22	14.3664	0.987825	22	3.47427	1.09633	22	5.84076	0.96316	22	8.59185	1.04708	22	11.4259
aLVQQmEQLR	13	P06727	N-Term(TMT10); M6(Oxidation)	0.001485	38.03	0.0108369	2	1460.81	0.616071	0	1.20002	13	6.06572	0.988497	13	6.71789	1.09189	13	11.0435	0.879716	13	7.23907	0.979656	13	4.47695	1.02621	13	12.9592	1.15279	13	4.57779	0.970664	13	11.7292	0.933182	13	15.1898
lVQTAELTk	1	O60234	N-Term(TMT10); K9(TMT10)	8.399e-05	33.16	0.0298047	2	1460.91	1.14638	0	0.774622	1		1.09918	1		1.04829	1		1.06854	1		0.926867	1		1.16179	1		0.911864	1		0.881093	1		1.21989	1
rDFTFDLYR	4	P05154	N-Term(TMT10)	0.001395	15.87	1.40928	3	1461.77	-0.056009	1	1.08788	4	5.85126	1.06698	4	1.97389	1.17051	4	17.5191	0.783602	4	3.32812	1.05928	4	21.329	0.932412	4	10.772	1.17052	4	12.0395	0.969026	4	13.3572	1.0449	4	13.0165
aNRPFLVFIR	6	P01008	N-Term(TMT10)	0.0002415	29.24	0.0824935	3	1461.89	0.0568298	0	1.09283	6	4.17959	0.991214	6	5.91367	1.02777	6	8.44883	1.11249	6	1.89637	1.04092	6	14.91	0.948236	6	5.34072	1.1752	6	9.71944	1.07315	6	5.76562	0.42776	6	30.5373
qLELYLPk	9	P05154	N-Term(TMT10); K8(TMT10)	0.006596	32.2	0.0448907	2	1461.91	-0.185229	0	1.17121	9	13.7003	1.08148	9	7.94744	1.07381	9	7.60628	0.470069	9	24.1096	0.991036	9	9.80809	1.06997	9	9.99652	1.26912	9	6.79282	1.11989	9	7.22866	1.09623	9	8.80197
lcQDLGPGAFR	26	P08697	N-Term(TMT10); C2(Carbamidomethyl)	1.595e-05	54.07	0.00023622	2	1462.76	-2.3118	0	1.08831	26	5.433	0.995522	26	11.1867	1.02347	26	3.05455	0.995362	26	3.12831	0.98479	26	7.44793	0.971964	26	8.71488	1.03179	26	7.99802	0.999011	26	7.33584	0.993518	26	10.5106
vHYTVcIWR	3	P0C0L4;P0C0L5;A0A0G2JPR0	N-Term(TMT10); C6(Carbamidomethyl)	0.001475	30.48	0.0628546	3	1462.78	0.37598	0
eTTLSYYk	5	Q86UX7	N-Term(TMT10); K8(TMT10)	0.0007358	31.2	0.0625068	2	1462.82	0.422874	0	0.660494	5	10.1553	1.00956	5	3.18671	0.891316	5	0.541684	1.08236	5	1.42614	0.97014	5	9.93524	1.13644	5	10.0018	1.01143	5	5.34228	0.97743	5	2.36252	1.29903	5	8.08076
sGTSATLGITGLR	1	A2NV54	N-Term(TMT10)	2.671e-07	30.96	0.0689443	2	1462.84	0.143424	0	1.15256	1		0.906068	1		1.85931	1		0.787817	1		1.90748	1		0.556021	1		0.816075	1		0.749875	1		0.667075	1
dVcDPGNTk	54	P02774	N-Term(TMT10); C3(Carbamidomethyl); K9(TMT10)	0.001351	51.82	0.000284437	2	1463.76	-0.654848	0	1.1351	54	7.20701	0.942095	54	5.50568	0.953935	54	9.53961	0.995307	54	4.82379	0.914875	54	8.6189	0.995604	54	6.8002	1.13226	54	7.16286	1.02088	54	5.09985	1.03287	54	7.07711
eTWTANVGk	40	P00734	N-Term(TMT10); K9(TMT10)	4.34e-05	50.14	0.00073347	2	1463.83	1.97267	0	1.12163	40	4.79791	0.930641	40	5.22744	0.989368	40	9.10593	1.04522	40	4.20553	0.848464	40	11.3304	1.00616	40	8.60526	1.07242	40	5.22302	0.997072	40	5.37782	1.09255	40	8.21336
eHVAHLLFLR	5	P19652	N-Term(TMT10)	1.563e-05	46.51	0.0017031	3	1463.87	0.138808	0	0.684792	5	12.5291	0.672744	4	9.19408	0.601894	4	11.6062	1.10193	5	6.943	4.30192	5	10.9712	0.465638	4	16.9332	0.740049	5	13.4987	0.409914	4	53.3517	0.550071	3	49.003
ccHccLLGR	4	P23142;B4DUV1;B1AHL2	N-Term(TMT10); C1(Carbamidomethyl); C2(Carbamidomethyl); C4(Carbamidomethyl); C5(Carbamidomethyl)	0.000425	27.19	0.00668449	3	1464.65	-1.50739	0
vLGPFcGEk	4	P48740	N-Term(TMT10); C6(Carbamidomethyl); K9(TMT10)	0.002219	37.13	0.0157818	2	1464.83	1.99286	0	1.2418	4	2.59028	1.00204	4	2.10876	0.926841	4	5.37445	0.94272	4	6.55224	0.922658	4	0.106951	0.88178	4	2.08712	1.1537	4	8.45309	1.04633	4	5.84013	1.03609	4	5.55117
aLLAFQESk	14	P20851	N-Term(TMT10); K9(TMT10)	3.278e-05	48.1	0.00110276	2	1464.88	0.702643	0	1.44335	14	7.85037	1.24076	14	7.47437	1.33626	14	9.75394	1.09396	14	3.67857	1.2744	14	5.52439	0.595056	14	10.2015	0.795121	14	10.8213	0.668039	14	18.4153	0.692773	14	14.1622
kPAITYGTR	3	A8K1K1	N-Term(TMT10); K1(TMT10)	0.00174	18.52	0.991967	3	1464.9	0.804768	0	1.1399	3	0.141594	0.883175	3	4.34298	0.939722	3	1.4582	1.09083	3	6.66313	0.908429	3	0.141645	1.08191	3	3.76047	0.89375	3	10.2083	1.11793	3	1.67222	1.15396	3	15.4374
dGEEAGAYDGPR	3	B3KQT9;H7BZJ3	N-Term(TMT10)	6.194e-08	60.58	4.72491e-06	2	1465.67	-0.684384	0
scNcLLLk	1	P06733	N-Term(TMT10); C2(Carbamidomethyl); C4(Carbamidomethyl); K8(TMT10)	0.0006188	25.92	0.338245	2	1465.83	1.36159	0	0.477579	1		1.09218	1		0.914102	1		1.21002	1		0.976529	1		1.09968	1		0.804041	1		0.942841	1		1.5	1
aLYVHGGYk	6	O75882;B4DZ36	N-Term(TMT10); K9(TMT10)	2.106e-05	40.79	0.00666528	2	1465.86	2.22235	0
vVFVFGPDk	1	P30041	N-Term(TMT10); K9(TMT10)	0.0004255	41.97	0.00475228	2	1465.88	1.69298	0	0.664465	1		1.09634	1		1.05107	1		1.1363	1		0.855093	1		1.07336	1		0.962826	1		1.05182	1		1.13331	1
qINDYVEk	16	P01009	N-Term(TMT10); K8(TMT10)	0.0005262	41.2	0.00549589	2	1466.83	0.126731	0	0.369541	16	22.2319	0.359119	16	28.3346	0.372457	16	31.0858	0.734782	16	9.15611	5.27075	16	13.9764	0.441381	16	25.5143	0.880716	16	4.66897	0.362607	16	34.4281	0.631809	16	9.90113
gVGGAPPTVTLLR	1	Q07954	N-Term(TMT10)	1.475e-07	71.22	5.14218e-06	2	1466.89	-1.14696	0	1.09476	1		1.02801	1		0.940747	1		0.884172	1		0.976665	1		0.979524	1		1.25976	1		1.03093	1		0.99065	1
lSNENHGIAQR	41	A2RTY6	N-Term(TMT10)	2.808e-07	54.74	0.000224776	2	1467.79	3.37119	0	1.1355	41	10.0094	0.928145	41	6.06447	0.936414	41	10.652	1.02263	41	4.32141	0.895797	41	5.8802	0.909599	41	7.53886	1.15937	41	9.02855	0.909045	41	26.0709	1.15871	41	6.05901
aQGYSGLSVk	5	P07996;A0A024R9Q1	N-Term(TMT10); K10(TMT10)	1.344e-06	47.63	0.0012193	2	1467.86	0.193598	0
lMIYEVNk	1	Q6PIK1	N-Term(TMT10); K8(TMT10)	0.0003229	37.57	0.0120827	2	1467.87	1.05675	0	1.17425	1		1.45051	1		1.96804	1		1.08207	1		2.09514	1		0.352238	1		0.449505	1		0.346155	1		0.280291	1
eDGGGWWYNR	23	P02675	N-Term(TMT10)	3.779e-05	41.16	0.000792392	2	1468.68	0.975844	0	1.21422	23	6.03777	0.991827	23	5.97802	1.38567	23	7.62761	0.978568	23	3.53923	1.32872	23	4.59763	0.67657	23	9.51567	1.10595	23	7.58467	0.812121	23	7.19919	0.678573	23	17.9768
fDGILGMAYPR	1	A0A1B0GW44	N-Term(TMT10)	0.0001377	35.94	0.0139057	2	1468.78	0.31659	0	1.10974	1		1.13031	1		1.33364	1		0.944775	1		1.36684	1		0.736935	1		0.928279	1		0.966814	1		0.620717	1
sLTScLDSk	10	O95445	N-Term(TMT10); C5(Carbamidomethyl); K9(TMT10)	3.307e-05	44.16	0.00329413	2	1468.81	0.640199	0	1.19837	10	14.0297	0.764979	10	5.32041	0.765437	10	9.87143	1.26898	10	7.26078	1.17195	10	1.18455	1.04893	10	8.13103	0.891913	10	6.77261	0.86421	10	7.81387	0.892978	10	11.0036
mATTMIQSk	17	A2RTY6	N-Term(TMT10); K9(TMT10)	1.12e-05	51.76	0.000559451	2	1468.83	1.32599	0	1.07159	17	14.7294	0.84476	17	5.02263	0.972794	17	10.9995	1.0077	17	10.0223	0.893987	17	10.621	0.955943	17	10.035	1.08448	17	12.3516	1.12163	17	7.87719	1.08727	17	7.53604
wNYIEGTk	8	A8K1K1	N-Term(TMT10); K8(TMT10)	0.0002332	36.85	0.0165953	2	1468.82	0.36692	0	1.07612	8	6.19435	0.925203	8	1.89661	0.998668	8	3.49343	1.01293	8	3.15289	0.874888	8	2.27153	0.99223	8	3.27055	0.872918	8	6.56437	1.16677	8	7.62414	1.0726	8	7.32706
nMEVFFPk	5	Q9UK55;B2RBZ5	N-Term(TMT10); K8(TMT10)	0.003373	32.89	0.0334642	2	1469.82	1.53996	0
aVGYLITGYQR	3	B2R950	N-Term(TMT10)	6.651e-05	38.55	0.00933472	2	1469.83	-0.709902	0	1.0879	3	0.810062	1.07381	3	5.29155	1.18142	3	4.20637	1.16143	3	2.58902	1.12766	3	4.82292	0.787225	3	6.04192	0.982245	3	5.41537	0.868984	3	0.172388	0.789612	3	21.4859
vHPVSTMIk	2	P00338	N-Term(TMT10); K9(TMT10)	0.0005621	26.43	0.110797	3	1469.89	-0.119246	0	0.742141	2	6.22927	1.1373	2	3.60718	1.10886	2	7.52673	1.23012	2	1.86002	0.845096	2	1.98986	1.0527	2	1.42052	0.858542	2	6.11815	0.727711	2	9.62343	1.36787	2	14.2091
iHPVSTMVk	3	P07195	N-Term(TMT10); K9(TMT10)	0.00302	26.06	0.120031	3	1469.89	0.254466	0	0.668558	3	1.88994	1.00433	3	11.0987	0.850698	3	1.2262	1.07167	3	10.1009	0.733428	3	0.0414263	1.01125	3	6.63255	1.02706	3	3.97463	1.09121	3	5.20377	1.65646	3	47.6943
wEYcNLk	22	P00747	N-Term(TMT10); C4(Carbamidomethyl); K7(TMT10)	0.00464	33.8	0.0193011	2	1470.78	1.89019	0	1.10741	22	6.61511	0.99059	22	4.12795	1.00521	22	6.75632	0.977698	22	2.16066	0.885857	22	7.13323	0.976765	22	5.87124	1.11186	22	2.82731	1.05274	22	4.42784	1.09254	22	6.20484
iQASTmAFk	2	P37802	N-Term(TMT10); M6(Oxidation); K9(TMT10)	0.004791	29.69	0.0657819	2	1470.84	-1.54382	0	0.480157	2	13.4609	0.836098	2	2.55205	0.808922	2	1.16348	0.931283	2	0.96394	0.99466	2	42.6648	1.00644	2	10.4512	0.728399	2	8.08289	0.944813	2	14.8145	2.52218	2	20.2618
akPALEDLR	11	P02647	N-Term(TMT10); K2(TMT10)	0.005769	30.5	0.0383238	2	1470.9	-0.18553	0	0.675813	11	11.1764	0.643597	11	15.6371	0.611962	11	18.3988	1.36591	11	7.38121	4.14641	11	7.41723	0.40778	11	25.5816	0.552831	11	21.6323	0.360409	11	18.9322	0.335848	11	36.1062
tYcSEPEk	42	P00450	N-Term(TMT10); C3(Carbamidomethyl); K8(TMT10)	0.0008532	43.71	0.00124062	2	1471.75	0.969785	0	1.13195	42	6.67042	0.89615	42	6.30271	1.04575	42	5.5853	0.983234	42	4.27776	1.00771	42	5.7079	0.95609	42	4.86031	1.06621	42	7.47595	0.993211	42	6.68577	1.04171	42	6.74128
eEILmHLWR	1	A8K1K1	N-Term(TMT10); M5(Oxidation)	0.005285	29.89	0.0499492	3	1471.8	2.67043	0	1.07848	1		0.998964	1		0.901558	1		0.913435	1		1.4197	1		0.873167	1		1.05767	1		0.853274	1		1.11078	1
tFTPQPPGLER	7	B0AZL7	N-Term(TMT10)	0.005569	22.11	0.347883	2	1471.81	0.423693	0	1.17688	7	6.81892	0.957691	7	17.2954	1.02527	7	7.98711	1.02291	7	11.022	1.05368	7	13.3923	0.906105	7	2.82068	0.966723	7	8.00769	0.973958	7	12.936	1.02332	7	2.39826
kLAVEPk	1	J3QQX6	N-Term(TMT10); K1(TMT10); K7(TMT10)	0.001681	21.75	0.153719	3	1471.98	-1.31755	1	0.95822	1		1.14284	1		0.926474	1		0.966266	1		0.910703	1		0.994074	1		1.1342	1		1.13265	1		0.897422	1
dLTDYLmk	13	P60709;P63261;A8K3K1;Q13707;Q562R1	N-Term(TMT10); M7(Oxidation); K8(TMT10)	0.006007	31.6	0.0392268	3	1472.81	-0.412892	0
aQSQLVAGIk	1	Q15828	N-Term(TMT10); K10(TMT10)	0.00267	10.64	6.39467	3	1472.92	0.251231	0	1.01469	1		0.943192	1		0.893757	1		0.983838	1		1.25884	1		0.988701	1		0.985726	1		0.979631	1		1.06489	1
aFWLDVSHNR	4	B0AZL7	N-Term(TMT10)	0.0001153	48.62	0.000714502	2	1473.77	-3.55239	0	1.09915	4	10.9639	1.02882	4	12.3845	1.12931	4	17.437	0.989327	4	3.04419	1.14903	4	15.0726	0.889554	4	13.5341	0.911365	4	3.30973	0.927265	4	20.1873	0.853916	4	11.7321
rWELcDIPR	5	P00747	N-Term(TMT10); C5(Carbamidomethyl)	0.003904	28.84	0.0694883	3	1473.78	0.892842	1	1.08798	5	3.94734	1.00475	5	7.53701	1.04762	5	1.61545	0.925529	5	8.98949	0.959567	5	11.5741	0.914745	5	5.33193	1.13113	5	16.5802	0.973296	5	4.41888	1.0817	5	8.10209
vSTAFVYTk	9	C0JYY2;Q59HB3	N-Term(TMT10); K9(TMT10)	4.597e-06	54.88	0.000237964	2	1473.87	0.156419	0
dVNAAIATIk	1	B3KPS3	N-Term(TMT10); K10(TMT10)	0.0004905	34.72	0.025735	3	1473.9	-0.501932	0	0.611513	1		1.00529	1		1.04482	1		0.991804	1		0.80473	1		1.24086	1		0.887436	1		0.982417	1		1.59209	1
qAELTVQVk	2	B3KSS4	N-Term(TMT10); K9(TMT10)	2.793e-06	52.03	0.000478106	2	1473.9	-0.0305087	0	1.00329	2	8.28284	0.95922	2	0.966307	0.901019	2	2.96757	1.00693	2	0.261964	0.913139	2	2.45543	1.08982	2	4.39526	1.15775	2	4.36893	1.1288	2	6.27839	0.890174	2	11.2405
iVDLVSELk	8	B2R815	N-Term(TMT10); K9(TMT10)	1.348e-05	50.95	0.00047167	2	1473.93	1.61671	0	1.31174	8	0.960816	0.93053	8	2.34253	0.984053	8	5.74629	0.921174	8	4.35085	0.858147	8	5.65291	0.965412	8	2.36865	1.20393	8	4.034	1.04814	8	3.22295	0.936892	8	5.66797
sVLGQLGITk	6	P01009	N-Term(TMT10); K10(TMT10)	6.05e-06	52.99	0.000249664	2	1473.94	0.126278	0	0.217207	6	25.802	0.194922	6	34.2592	0.198868	6	45.4256	0.659995	6	10.1612	6.45791	6	5.33554	0.262613	6	39.0654	0.856218	6	10.6175	0.150715	6	15.3977	0.507566	6	17.3415
cTSTGWIPAPR	13	P08603;A8K5T0	N-Term(TMT10); C1(Carbamidomethyl)	1.086e-06	57.53	0.000301816	2	1474.77	0.362521	0
sGINcPIQk	2	G3V2V8	N-Term(TMT10); C5(Carbamidomethyl); K9(TMT10)	0.0006589	44.27	0.00276655	2	1474.84	-2.14307	0	1.13244	2	6.30233	0.996714	2	11.9094	1.06834	2	3.76335	0.934183	2	1.99114	0.882752	2	4.04305	0.920627	2	1.59565	1.14987	2	2.45729	1.01654	2	11.7106	1.07671	2	8.23477
aAVILESIFLk	2	Q5JY90	N-Term(Acetyl); K11(TMT10)	0.0001361	65.71	1.85423e-05	2	1474.91	1.54027	0	0.703538	2	23.1652	1.06623	2	6.89561	0.865475	2	7.86549	1.02336	2	5.554	1.08405	2	7.536	1.12314	2	6.35576	1.04579	2	12.5787	1.10316	2	2.78546	0.994786	2	9.1666
dYFIATck	13	Q53HT9	N-Term(TMT10); C7(Carbamidomethyl); K8(TMT10)	0.001217	43.99	0.00250189	2	1475.8	0.932426	0	1.20475	13	4.04221	1.00104	13	5.19293	0.973948	13	6.30533	0.943042	13	4.55937	0.830973	13	4.04373	0.903563	13	4.07422	1.21103	13	5.72457	1.04639	13	3.82178	1.0509	13	5.32171
iHIGSSFEk	4	Q96IY4	N-Term(TMT10); K9(TMT10)	0.0001917	34.93	0.0280553	3	1475.86	0.0016971	0	1.29261	4	3.54383	0.98011	4	4.98768	1.08865	4	1.9716	0.990419	4	1.90903	0.931933	4	4.86157	0.944666	4	2.3623	1.13413	4	1.12097	0.721877	4	9.84653	1.19211	4	1.39843
vWVYPPEk	112	P02790	N-Term(TMT10); K8(TMT10)	0.003219	33.89	0.0383616	3	1475.87	-0.178765	0	1.17399	112	6.93909	0.996065	112	5.37438	1.00206	112	6.39976	1.00223	112	6.27929	0.877198	112	9.67078	0.938805	112	6.2415	1.12559	112	8.75676	0.997086	112	4.99473	0.969546	112	7.74214
sLHTLFGDk	8	P02768;F6KPG5	N-Term(TMT10); K9(TMT10)	0.0002516	33.79	0.0366228	2	1475.86	-0.609526	0
tIVTTLQDSIR	2	P07996;A0A024R9Q1	N-Term(TMT10)	5.689e-06	40.44	0.00773976	2	1475.86	1.21452	0
lATALSLSNk	4	C0JYY2;Q59HB3	N-Term(TMT10); K10(TMT10)	4.662e-06	50.08	0.000835467	2	1475.92	1.44134	0
vLMSVLNDNSR	10	A0A1U9X8W4	N-Term(TMT10)	6.839e-05	52.82	0.000498627	3	1476.8	-0.915967	0	1.14001	10	2.58329	0.992208	10	7.00702	0.99172	10	10.3899	0.986869	10	5.13257	0.998741	10	13.7973	0.97446	10	9.20535	1.11269	10	5.70408	1.03777	10	11.6958	0.958915	10	13.8735
iTLPDFTGDLR	1	Q8TCF0	N-Term(TMT10)	0.0007404	43.5	0.00477281	2	1476.82	-4.90928	0	1.25026	1		1.17041	1		1.18656	1		0.709737	1		0.800816	1		0.812802	1		1.23777	1		1.13077	1		0.982311	1
aTVLNYLPk	20	P01023;B2R950;B7Z7M2	N-Term(TMT10); K9(TMT10)	3.776e-05	44.97	0.00223212	2	1476.92	-0.538155	0
vIGSGcNLDSAR	7	P00338;P07195	N-Term(TMT10); C6(Carbamidomethyl)	1.987e-07	70.51	3.68129e-06	2	1477.76	0.99249	0
vTQEFHMk	16	C0JYY2;Q59HB3;E1B4S9	N-Term(TMT10); K8(TMT10)	0.0006776	36.34	0.0199059	3	1477.82	0.75007	0
aFELMHSGk	1	P11766	N-Term(TMT10); K9(TMT10)	0.001571	29.9	0.0874404	3	1477.82	-0.247913	0	0.648999	1		1.0292	1		1.00915	1		1.17821	1		0.944104	1		1.14409	1		1.01521	1		0.999921	1		1.03764	1
tWYPEVPk	14	B4E1D8;P04003	N-Term(TMT10); K8(TMT10)	0.004881	36.15	0.0225189	3	1477.85	5.34757	0
cSNPAVVFVTR	1	B2R5J8	N-Term(TMT10); C1(Carbamidomethyl)	1.536e-05	30.19	0.078107	2	1478.79	-2.72652	0	0.796701	1		0.791347	1		0.762654	1		0.741873	1		0.83035	1		1.33943	1		1.2097	1		1.37924	1		1.32057	1
lIcQATGFSPR	6	P01871;Q86TT1;P0DOX6	N-Term(TMT10); C3(Carbamidomethyl)	2.007e-07	59.75	9.2261e-05	2	1478.8	1.23574	0
eDVYVVGTVLR	39	B4E1D8;P04003	N-Term(TMT10)	5.041e-06	42.22	0.00461839	2	1478.84	0.452689	0
eVQQGEEFER	2	P00568	N-Term(TMT10)	9.069e-05	39.36	0.00321561	2	1479.73	1.03556	0	0.566619	2	16.5218	1.03033	2	17.069	0.804998	2	19.4578	0.952841	2	1.81858	0.940087	2	2.41876	1.1533	2	13.541	0.969897	2	12.0914	1.2132	2	27.7216	1.35103	2	37.5964
nNALDFVTk	34	C0JYY2;Q59HB3	N-Term(TMT10); K9(TMT10)	1.59e-05	54.55	0.000293755	2	1479.86	0.762685	0
gcPTEEGcGER	4	P10643;B2R6W1	N-Term(TMT10); C2(Carbamidomethyl); C8(Carbamidomethyl)	0.000899	44.68	0.000107229	2	1480.64	2.1777	0
vDGALcMEk	201	P02790	N-Term(TMT10); C6(Carbamidomethyl); K9(TMT10)	2.998e-05	54.44	0.00024445	2	1480.79	0.984889	0	1.12549	201	6.24861	0.981214	201	5.95243	0.945783	201	7.28615	0.978016	201	5.02885	0.887547	201	8.05802	0.968656	201	6.18797	1.11559	201	6.44532	1.02528	201	6.36019	1.04879	201	5.24115
eNFVLTTAk	7	P22891	N-Term(TMT10); K9(TMT10)	1.055e-05	54.23	0.00027374	2	1480.88	-0.236641	0	0.969805	7	2.77678	0.877846	7	6.08611	1.01273	7	2.47635	1.10907	7	7.40436	0.914048	7	2.45448	0.916595	7	1.37964	1.20653	7	2.95651	0.975897	7	3.73922	1.1731	7	2.97346
yTHLScDk	7	G3XAM2;Q6LAM1	N-Term(TMT10); C6(Carbamidomethyl); K8(TMT10)	0.001724	33.77	0.0273473	2	1481.78	-0.33974	0
iFEGNTNTk	8	P12259	N-Term(TMT10); K9(TMT10)	0.004502	34.4	0.0330038	3	1481.84	0.188477	0	1.08584	8	3.75365	0.931277	8	9.17936	0.985925	8	8.64869	0.90367	8	5.98148	0.921263	8	8.5706	0.929292	8	8.80613	1.28463	8	8.15689	1.01653	8	6.12068	1.16827	8	5.83733
lSEDYGVLk	11	B4DF70	N-Term(TMT10); K9(TMT10)	0.0001105	33.33	0.0357212	2	1481.86	-0.319677	0	1.07463	11	4.16817	0.91189	11	5.69409	1.29511	11	4.50911	0.989403	11	1.67582	0.839616	11	4.50527	0.855527	11	4.2626	1.05974	11	4.08553	1.06778	11	1.85022	1.07747	11	6.23502
qVFLYPEk	9	C0JYY2;Q7Z7Q0	N-Term(TMT10); K8(TMT10)	0.001153	40.37	0.00669924	2	1481.88	0.674763	0
eGVHGGLINk	23	P07737	N-Term(TMT10); K10(TMT10)	2.893e-06	49.54	0.000885494	2	1481.88	0.0793397	0	0.564112	23	38.861	1.05491	23	5.93856	0.974604	23	18.7002	1.1833	23	9.73177	1.02818	23	20.8176	1.12648	23	13.2994	0.845046	23	14.9351	0.931252	23	9.52361	1.36188	23	25.6315
dNEDFQESNR	10	P00450	N-Term(TMT10)	7.252e-06	47.17	0.000111283	2	1482.67	0.862336	0	1.05002	10	16.9701	1.01568	10	12.4025	0.979048	10	22.9289	0.985619	10	9.69296	1.06965	10	18.6214	0.988192	10	7.4266	0.994052	10	11.3338	1.00334	10	13.4313	0.920343	10	5.42534
fEELNADLFR	3	P11142	N-Term(TMT10)	0.0002447	41.1	0.00409082	2	1482.78	1.50009	0	0.521272	3	3.1788	0.986709	3	9.18955	0.970702	3	0.380083	1.04461	3	3.86251	0.899603	3	11.1814	1.30615	3	5.12244	1.00159	3	1.36899	1.00324	3	0.567165	1.41657	3	1.85428
fVTWIEGVmR	2	P00747	N-Term(TMT10); M9(Oxidation)	0.001589	26.4	0.141576	2	1482.8	0.458014	0	1.10911	2	0.670956	1.02176	2	8.76541	1.08371	2	12.9555	0.976442	2	9.20825	0.787009	2	0.14265	1.08249	2	5.14922	1.11675	2	3.18266	1.12853	2	9.9556	0.732228	2	29.9396
fISLGEAck	5	P01024	N-Term(TMT10); C8(Carbamidomethyl); K9(TMT10)	1.321e-05	50.65	0.000523054	2	1482.84	0.198111	0	1.10437	5	2.95234	1.07549	5	6.89746	1.0972	5	1.82958	0.904239	5	2.56851	0.974359	5	7.92324	0.882314	5	5.88513	0.91579	5	8.48835	1.12024	5	0.742508	0.956831	5	9.90136
sVPMVPPGIk	10	P51884	N-Term(TMT10); K10(TMT10)	0.0001005	53.87	0.000196283	2	1482.92	3.46917	0	1.09489	10	3.09678	0.961572	10	3.40988	0.956534	10	6.98048	0.949507	10	6.17204	0.914357	10	3.46104	0.973929	10	8.01559	1.15167	10	3.82397	1.10234	10	4.76877	0.946722	10	7.64364
gFSSGSAVVSGGSR	6	P35908	N-Term(TMT10)	1.454e-07	67.85	6.07018e-06	2	1483.77	1.89759	0	0.87706	6	9.13472	0.954624	6	6.10359	1.02386	6	7.93091	0.767105	6	8.25887	0.656503	6	6.70644	1.059	6	20.5546	1.46298	6	7.40518	1.36428	6	11.2173	1.0357	6	14.4246
hLSLLTTLSNR	12	P02774	N-Term(TMT10)	5.889e-05	47.27	0.00677436	3	1483.88	-0.16764	0	1.22719	12	9.01618	1.02689	12	19.2154	0.992655	12	9.71787	1.01437	12	4.86401	0.948159	12	9.10489	0.987328	12	11.5358	1.15453	12	8.93708	0.812283	12	15.6203	0.809994	12	4.78758
aIGYLNTGYQR	25	P01023	N-Term(TMT10)	1.136e-05	54.86	0.000202484	2	1484.81	0.0218896	0	1.53303	25	21.2402	1.25213	25	13.7575	1.3874	25	15.7141	1.57456	25	22.8453	1.40123	25	22.6206	0.513688	25	60.622	0.577208	23	55.7804	0.454666	21	69.2348	0.517803	16	38.3902
mATTmIQSk	18	A2RTY6	N-Term(TMT10); M5(Oxidation); K9(TMT10)	0.0009011	39.73	0.00687968	2	1484.82	1.44787	0	1.14132	18	5.48648	0.881978	18	3.97672	0.913393	18	13.2976	1.01796	18	8.06357	0.903432	18	11.5343	0.97439	18	6.23399	1.09755	18	4.27142	0.95946	18	10.2744	1.21164	18	8.9795
ySSLAEAASk	9	P00915;E5RIF9	N-Term(TMT10); K10(TMT10)	1.783e-06	62.97	3.73449e-05	2	1484.84	-0.169899	0
dAGPLLISLk	2	P31146	N-Term(TMT10); K10(TMT10)	0.0001032	39.71	0.00313233	2	1484.94	-0.449595	0	0.60281	2	24.0083	0.900735	2	3.32054	1.09932	2	18.8681	1.20029	2	8.51162	0.979159	2	20.0292	1.19294	2	5.02922	0.966868	2	4.00589	0.903976	2	36.0885	1.15008	2	3.77608
yIFHNFMER	12	B2RMS9;B7ZKJ8;B7Z8Q7;B7Z544	N-Term(TMT10)	0.0001461	42.69	0.00159866	3	1485.75	0.00568736	0
eYTNIFLk	10	F2RM37	N-Term(TMT10); K8(TMT10)	0.0001547	43.49	0.00275568	2	1485.87	-1.32362	0	1.20213	10	8.29363	0.988773	10	2.07412	1.03487	10	4.28049	1.00262	10	3.18982	0.811763	10	6.20918	0.847899	10	9.7303	0.943467	10	3.77104	1.10799	10	6.2624	1.13067	10	4.24901
lGFTDLFSk	4	B2R815	N-Term(TMT10); K9(TMT10)	0.0001057	41.53	0.00432741	2	1485.87	-0.761999	0	1.30734	4	2.79389	1.05369	4	1.46294	0.915809	4	5.79665	0.923176	4	3.05044	0.743076	4	17.3074	0.946281	4	3.52297	1.14873	4	2.8805	1.04285	4	2.62813	1.0203	4	6.43081
tEVNVLPGAk	29	A2RTY6	N-Term(TMT10); K10(TMT10)	5.062e-05	54.38	0.000201162	2	1485.91	1.60605	0	1.09195	29	3.75274	0.96535	29	8.30601	1.00898	29	16.615	1.04843	29	6.13186	0.900809	29	14.0035	0.894002	29	7.7076	1.07781	29	6.99955	1.04787	29	9.80163	1.0485	29	11.6652
mNVAPAcLPER	9	P00742	N-Term(TMT10); C7(Carbamidomethyl)	0.000169	42.25	0.00251369	3	1486.77	0.389888	0	1.05505	9	7.58615	0.961737	9	5.02519	1.0096	9	3.27204	1.02765	9	7.97268	0.927363	9	13.2811	1.05993	9	7.1896	1.07251	9	8.01128	0.959474	9	4.68876	1.07708	9	2.38948
qcVWGHNk	3	Q6UXB8	N-Term(TMT10); C2(Carbamidomethyl); K8(TMT10)	0.0006126	38.36	0.00763689	2	1486.8	1.09323	0	1.03343	3	0.811127	1.08174	3	0.307055	0.923491	3	4.40328	0.909381	3	1.40213	0.835365	3	3.4164	1.01947	3	9.12342	1.18431	3	0.490247	1.11453	3	1.45391	0.966742	3	3.36068
nSLFEYQk	32	P02671	N-Term(TMT10); K8(TMT10)	0.000222	42.64	0.00382513	2	1486.83	0.402908	0	1.2612	32	5.59476	0.984201	32	3.12039	1.33317	32	6.4151	0.952013	32	4.62664	1.27654	32	6.46184	0.689709	32	13.7285	1.1035	32	6.36372	0.866708	32	5.67784	0.767303	32	9.99807
tNQVNSGGVLLR	4	P02747	N-Term(TMT10)	6.852e-07	55.11	0.000221373	2	1486.85	0.551921	0	1.18336	4	5.59086	1.54013	4	5.27674	1.15546	4	4.73874	1.09269	4	4.08665	0.600856	4	12.7354	0.935129	4	4.24715	0.786949	4	12.4496	1.11679	4	3.01199	0.405905	4	19.6577
iDLAVGDVVk	8	Q86UX7	N-Term(TMT10); K10(TMT10)	4.223e-06	56.52	0.000122118	2	1486.92	-0.381664	0	0.626188	8	10.4617	1.07507	8	4.60152	0.933643	8	3.44017	1.10258	8	7.70139	0.910656	8	4.29537	1.19609	8	3.4273	0.968346	8	7.06299	0.945119	8	3.99804	1.25451	8	8.32663
lSNVLQQVk	6	C0JYY2	N-Term(TMT10); K9(TMT10)	2.299e-05	52.76	0.000264832	2	1486.94	0.945627	0	1.25655	6	2.50668	0.683966	6	1.7396	0.885921	6	7.08732	1.21652	6	3.27378	0.868742	6	6.89587	1.11316	6	9.13755	1.04534	6	3.8328	1.10106	6	7.10532	0.80467	6	1.37744
dGLGFcALIHR	2	P12814	N-Term(TMT10); C6(Carbamidomethyl)	5.069e-06	61.02	4.39617e-05	3	1487.8	0.621485	0	0.679539	2	16.6202	0.947035	2	6.31997	1.17391	2	5.06315	1.10036	2	2.41196	1.03936	2	4.46373	0.969877	2	0.976375	0.992579	2	6.75913	0.958578	2	5.5573	1.26689	2	20.3302
cVVQHTASk	3	Q8NF20;P0DOX3	N-Term(TMT10); C1(Carbamidomethyl); K9(TMT10)	0.0001828	29.35	0.0813014	2	1487.84	0.172425	0
vTEGSFVYk	1	P50395	N-Term(TMT10); K9(TMT10)	0.0003255	26.07	0.167089	2	1487.85	-3.71592	0	0.717018	1		0.922764	1		0.974228	1		1.3216	1		0.866539	1		1.0383	1		0.972772	1		1.02638	1		1.11231	1
gLEWVANIk	6	V9HW68;Q0ZCH9	N-Term(TMT10); K9(TMT10)	5.748e-06	55.36	0.00038698	2	1487.9	0.36442	0
kDIALLk	2	P00747	N-Term(TMT10); K1(TMT10); K7(TMT10)	0.00629	13.54	0.944926	3	1488.01	0.324269	1	1.1518	2	1.9886	0.940368	2	9.5846	0.974686	2	12.6437	0.984593	2	1.22827	0.801026	2	2.8084	0.982741	2	0.550042	1.15624	2	0.806596	1.09337	2	12.8286	1.02689	2	0.356608
vGFYESDVMGR	66	P01023	N-Term(TMT10)	7.604e-07	56.24	4.46846e-05	2	1488.73	-1.04719	0	1.45079	66	13.8104	1.27101	66	7.76223	1.34758	66	11.1535	1.53972	66	14.7087	1.49417	66	13.7588	0.491973	66	46.14	0.502911	66	42.6635	0.399382	59	49.8124	0.434902	57	41.0382
sSFTVDcSk	2	P21333	N-Term(TMT10); C7(Carbamidomethyl); K9(TMT10)	7.616e-05	21.21	0.302355	2	1488.78	0.00924752	0	0.562258	2	12.195	1.0443	2	0.616484	1.24633	2	16.0769	0.883785	2	0.672594	0.711397	2	9.02414	1.29525	2	3.02059	0.8929	2	9.81662	0.832098	2	1.04398	1.83342	2	2.73777
tSAPPSRPPPPR	1	B7Z6F3	N-Term(TMT10)	0.0002165	26.19	0.149672	3	1488.85	-0.682757	0	0.419409	1		0.81063	1		0.723878	1		0.887548	1		1.54349	1		1.2555	1		0.864325	1		1.0755	1		1.57718	1
cGPASVQAIk	9	B2R6V9	N-Term(TMT10); C1(Carbamidomethyl); K10(TMT10)	2.756e-05	54.06	0.000320006	2	1488.86	-0.0966698	0	0.854164	9	10.4026	1.04406	9	6.7049	1.06901	9	7.42942	1.12159	9	8.21187	0.867999	9	14.3001	0.922079	9	6.64605	0.981646	9	7.03582	1.01021	9	8.11095	1.11377	9	16.3317
lSSPAVITDk	50	P00747	N-Term(TMT10); K10(TMT10)	7.874e-05	56.87	0.000190889	2	1488.91	1.42124	0	1.08876	50	6.83052	0.980391	50	5.22504	0.979586	50	6.89309	1.0038	50	5.26172	0.836318	50	10.0697	0.993812	50	4.25415	1.08292	50	6.41102	1.03159	50	6.00717	1.05656	50	8.56961
eIGELTQLk	10	Q15404	N-Term(TMT10); K9(TMT10)	0.001441	44.95	0.00249674	3	1488.91	4.03577	0	0.582094	10	18.7209	0.958852	10	6.55335	1.0191	10	3.40119	1.08975	10	3.90913	0.882034	10	9.91603	1.19555	10	10.9955	0.920995	10	3.455	0.987877	10	3.94231	1.5051	10	10.9233
vAYDLVYYVR	2	Q9Y6R7	N-Term(TMT10)	0.0002597	21.06	0.566811	2	1489.83	3.68013	0	1.36337	2	12.4815	0.994899	2	2.33071	1.24064	2	3.59132	0.843767	2	2.53808	0.939976	2	24.3939	1.04304	2	1.09499	1.13895	2	6.06292	0.939719	2	4.69755	0.681387	2	6.03043
mFQEIVHk	8	A8K1K1	N-Term(TMT10); K8(TMT10)	0.001889	40.08	0.00850194	3	1489.86	0.653319	0	1.12244	7	5.61827	0.889743	8	9.88854	1.0492	7	3.32888	1.01007	8	4.21498	0.929495	8	6.85175	0.972677	7	5.38701	0.861089	7	5.43183	1.15807	8	6.43634	1.11477	7	9.27736
wELDLDIk	4	B4E1C4	N-Term(TMT10); K8(TMT10)	0.000922	40.59	0.00795277	2	1489.87	-0.955339	0	1.09462	4	0.828578	0.896306	4	3.38624	0.853388	4	2.85211	0.994834	4	0.668935	0.859977	4	1.86588	1.03196	4	1.79876	1.17355	4	3.31377	1.08827	4	2.44777	1.10771	4	5.62339
vLDELTLTk	12	P13645	N-Term(TMT10); K9(TMT10)	1.979e-05	52.78	0.000366425	2	1489.93	1.49262	0	0.846187	12	6.13358	0.905889	12	7.04794	1.15558	12	2.43097	0.701517	12	5.46861	0.603515	12	6.64119	1.02057	12	4.9703	1.40078	12	6.9867	1.70408	12	8.03412	0.777387	12	6.45074
sIAAATSALVk	5	Q9Y4G6;Q9Y490	N-Term(TMT10); K11(TMT10)	2.154e-08	66.17	1.45532e-05	2	1489.94	1.07657	0
lMNHYINk	4	Q9UK55;B2RBZ5	N-Term(TMT10); K8(TMT10)	0.0005021	38.6	0.0175723	2	1490.85	-0.41679	0
tSQDPLMIk	7	P22891	N-Term(TMT10); K9(TMT10)	0.0001083	40.79	0.0101834	2	1490.86	-1.58476	0	0.987464	7	7.87545	0.881015	7	2.77417	0.997428	7	3.91492	1.09536	7	4.54343	0.927582	7	2.06726	0.92139	7	3.33419	1.07398	7	6.81161	1.08024	7	4.64103	1.05187	7	3.42639
aIPVTQYLk	8	P43652	N-Term(TMT10); K9(TMT10)	5.781e-05	50.54	0.000629636	2	1490.94	1.00576	0	1.13883	8	8.07153	0.826911	8	9.85962	0.984007	8	9.03114	0.856465	8	2.49156	0.823209	8	6.27659	0.966512	8	5.88251	1.14565	8	7.73323	1.31202	8	7.93037	1.1	8	15.1662
gQcIINSNk	23	P43652	N-Term(TMT10); C3(Carbamidomethyl); K9(TMT10)	2.098e-05	58.84	0.000113767	2	1491.84	0.713269	0	1.14229	23	8.27999	0.886238	23	9.7347	0.934108	23	6.86102	0.818979	23	7.67686	0.899781	23	18.1507	1.0066	23	6.36016	1.10317	23	9.78443	1.20346	23	7.94879	1.15162	23	11.0025
fAGVFHVEk	5	A0A1Z1VXF2	N-Term(TMT10); K9(TMT10)	0.002775	27.73	0.136273	3	1491.88	1.9127	0	1.21967	5	2.10805	0.992393	5	2.88869	1.0999	5	7.63166	0.995713	5	1.75265	1.38625	5	37.4404	0.805664	5	18.4815	0.947688	5	13.7602	0.837077	5	8.22521	0.77893	5	19.6304
mNFRPGVLSSR	4	B2RMS9;B7ZKJ8;B7Z544	N-Term(TMT10)	0.0002921	29.32	0.0829175	3	1492.82	-0.876757	0
fLNAENAQk	2	P43487	N-Term(TMT10); K9(TMT10)	2.509e-05	39.57	0.00924666	2	1492.85	-0.395927	0	0.759663	2	28.0046	1.01679	2	7.77775	0.934911	2	7.04651	1.05012	2	11.0742	0.921779	2	7.75793	1.11438	2	8.26806	1.00416	2	7.61078	1.01496	2	1.2502	1.23505	2	18.9635
lLSLGAGEFk	6	P12259	N-Term(TMT10); K10(TMT10)	1.699e-06	51.42	0.000489632	2	1492.91	-0.986069	0	1.00091	6	4.02109	0.91989	6	4.47206	1.02592	6	8.64646	1.15091	6	6.53824	0.993251	6	4.10998	0.915436	6	5.60508	1.05024	6	7.99759	0.851946	6	11.7265	1.25434	6	9.50463
scALSNLAcIR	4	P03951	N-Term(TMT10); C2(Carbamidomethyl); C9(Carbamidomethyl)	7.005e-07	50.66	0.000419628	2	1493.77	-1.78603	0	1.02286	4	3.19386	0.979863	4	2.02423	1.01008	4	5.45241	1.07249	4	11.6625	0.945792	4	4.90232	0.959725	4	5.31794	1.01171	4	1.84527	1.01425	4	1.80803	1.07664	4	4.91979
vTQEFHmk	16	C0JYY2;Q59HB3;E1B4S9	N-Term(TMT10); M7(Oxidation); K8(TMT10)	0.0002237	56.81	0.000140286	3	1493.82	0.182794	0
tYLPAVDEk	19	K7ER74	N-Term(TMT10); K9(TMT10)	0.0001811	44.67	0.00284043	2	1493.86	0.254893	0	0.827824	19	9.40767	0.765221	19	8.16396	0.637119	19	14.1809	1.85879	19	8.40685	0.926204	19	6.44214	1.20508	19	4.34257	0.61664	19	16.5406	0.831072	19	4.7265	0.944303	19	4.17405
lGQYASPTAk	44	P0C0L4;P0C0L5;A0A0G2JPR0	N-Term(TMT10); K10(TMT10)	9.531e-05	57.25	0.000157473	3	1493.87	0.961201	0
sAVDAGFLQk	3	P09172	N-Term(TMT10); K10(TMT10)	1.361e-05	40.41	0.00759323	2	1493.87	-1.80104	0	0.985665	3	0.132946	0.954827	3	1.36675	0.920953	3	4.46307	1.14156	3	2.75838	0.7974	3	14.5661	0.990146	3	2.24225	1.10845	3	0.085667	1.17549	3	1.19105	0.946006	3	2.32512
tVFGTEPDMIR	9	A8K1K1	N-Term(TMT10)	0.004331	39.62	0.00623758	2	1494.78	-0.201507	0	1.1094	9	8.75701	0.893366	9	5.84593	0.9922	9	2.60969	1.01158	9	2.08324	0.947012	9	10.3984	0.979614	9	5.80608	0.918946	9	4.8488	1.13847	9	5.38853	1.09531	9	10.2308
gAYQNNEIk	18	C0JYY2	N-Term(TMT10); K9(TMT10)	1.724e-05	53.88	0.000324544	2	1494.83	0.746552	0	1.28936	18	5.53171	0.835816	18	4.60329	0.886987	18	7.02101	1.10273	18	3.5375	0.947847	18	3.92732	1.08793	18	7.98885	1.06568	18	5.46478	0.96564	18	4.76721	0.930526	18	12.3817
rPcFESLk	9	P43652	N-Term(TMT10); C3(Carbamidomethyl); K8(TMT10)	6.031e-05	39.37	0.00934717	3	1494.85	0.596141	0	1.16964	9	6.23823	0.870232	9	5.20301	0.974017	9	6.98002	0.847691	9	7.11096	0.832157	9	9.23952	0.980099	9	9.68083	1.17944	9	4.41301	1.16852	9	6.42514	1.12573	9	11.6413
rLDGSVDFk	25	A0A140VJJ6;D3DP16	N-Term(TMT10); K9(TMT10)	0.0004608	24.93	0.241185	3	1494.87	-0.693196	1
lLAEPVPGIk	1	P61088	N-Term(TMT10); K10(TMT10)	4.669e-05	49.69	0.000224464	2	1494.97	-0.193623	0	0.566756	1		1.11807	1		0.967734	1		1.03642	1		0.803059	1		1.06082	1		0.998053	1		1.10645	1		1.44064	1
gIcWcVDk	1	P24593	N-Term(TMT10); C3(Carbamidomethyl); C5(Carbamidomethyl); K8(TMT10)	0.0001148	31.09	0.0335723	2	1495.78	-0.336022	0	1.16624	1		0.836122	1		1.00132	1		0.862646	1		1.10139	1		1.04011	1		1.00007	1		1.02633	1		1.17143	1
sASATYYFk	1	A0A024RD39	N-Term(TMT10); K9(TMT10)	0.0001702	33.17	0.0303386	2	1495.83	3.77697	0	1.26806	1		0.980055	1		1.15037	1		1.15002	1		1.05528	1		0.812151	1		1.11175	1		0.908954	1		0.62588	1
vDAAFNWSk	1	P08253	N-Term(TMT10); K9(TMT10)	0.0001019	27.54	0.115409	2	1495.83	2.3632	0	1.12127	1		0.979639	1		1.11342	1		0.900546	1		0.881312	1		0.934504	1		1.33596	1		1.08796	1		0.841596	1
tAAQNLYEk	16	K7ER74	N-Term(TMT10); K9(TMT10)	9.527e-06	53.69	0.000278771	2	1495.86	2.0422	0	0.832554	16	13.0478	0.749497	16	10.7496	0.634217	16	8.98256	1.8157	16	9.49175	0.912024	16	6.8736	1.16845	16	7.66196	0.602051	16	18.1104	0.843666	16	6.28972	0.964484	16	3.31905
sPGAPGPLTLk	1	Q96AF9	N-Term(TMT10); K11(TMT10)	0.001669	33.78	0.0248135	3	1495.93	1.08428	0	0.701849	1		0.881427	1		0.916315	1		1.10645	1		0.863383	1		1.1921	1		1.08131	1		1.16507	1		1.11457	1
vDGALcmEk	51	P02790	N-Term(TMT10); C6(Carbamidomethyl); M7(Oxidation); K9(TMT10)	0.006385	35.77	0.0128187	2	1496.79	0.457006	0	1.12137	51	7.83225	0.954724	51	6.0271	0.937512	51	12.8952	1.01671	51	8.82236	0.924322	51	8.0961	0.975359	51	9.07979	1.09585	51	6.92602	0.976009	51	10.2308	1.07238	51	8.02294
gGNQLYcVk	12	P13671;A8K8Z4	N-Term(TMT10); C7(Carbamidomethyl); K9(TMT10)	4.282e-06	62.98	3.30296e-05	2	1496.83	0.358373	0
dHAVDLIQk	69	P0C0L4;P0C0L5;Q9UNU2;A0A0G2JPR0	N-Term(TMT10); K9(TMT10)	1.729e-05	59.87	5.9917e-05	2	1496.88	0.468782	0
gVHIPNcDk	11	A6XND1	N-Term(TMT10); C7(Carbamidomethyl); K9(TMT10)	0.005074	36.04	0.046691	2	1497.83	1.32227	0	1.17282	11	8.7069	0.886657	11	8.19982	0.943271	11	7.0761	1.0072	11	10.9292	0.990882	11	5.37438	1.05456	11	12.5942	0.947526	11	6.42238	0.99331	11	10.1009	1.0922	11	10.2973
eLLLQPVTISR	2	P59998	N-Term(TMT10)	0.003896	32.06	0.0328575	2	1497.92	-0.67844	0	0.758546	2	5.34732	1.06017	2	0.326984	1.24659	2	3.6362	1.10751	2	12.1116	1.06678	2	6.02765	1.0364	2	2.06037	0.838884	2	12.1102	0.968267	2	11.7138	0.956951	2	2.06118
hITSLEVIk	3	P10720;P02776	N-Term(TMT10); K9(TMT10)	0.0007324	28.25	0.0647122	3	1497.94	1.4462	0
lEGNPIVLGk	1	P20774	N-Term(TMT10); K10(TMT10)	0.0001217	20.97	0.342329	2	1497.94	2.15488	0	1.15006	1		1.07499	1		0.945529	1		0.991654	1		0.845419	1		0.849894	1		1.21533	1		1.00921	1		1.06647	1
eVEEDEYk	5	Q5CAQ5	N-Term(TMT10); K8(TMT10)	6.853e-05	40.54	0.0037001	2	1498.77	0.477002	0	0.842641	5	4.2482	0.867295	5	6.16727	1.03824	5	13.6971	1.05852	5	12.1332	0.819236	5	4.8044	1.06544	5	7.84009	1.11146	5	8.95486	1.02546	5	2.84842	1.2868	5	8.94014
tADGIVSHLk	6	B3KQT9	N-Term(TMT10); K10(TMT10)	1.165e-06	65.69	1.54311e-05	2	1498.9	-0.688687	0	0.650543	6	4.98558	0.997289	6	9.55888	0.954415	6	3.49626	1.08479	6	3.5462	0.910229	6	4.56874	1.12352	6	6.15919	0.962558	6	5.9372	0.930883	6	2.85399	1.48792	6	3.48026
sVPmVPPGIk	6	P51884	N-Term(TMT10); M4(Oxidation); K10(TMT10)	0.00128	34.07	0.0204685	2	1498.91	1.69394	0	1.04036	6	4.76286	0.980602	6	3.30928	0.917281	6	16.0647	0.901468	6	7.99719	1.08403	6	19.0906	1.03808	6	6.85965	1.08811	6	14.1105	0.99967	6	14.9729	0.973389	6	16.7661
eTSNFGFSLLR	3	Q9UK55;B2RBZ5	N-Term(TMT10)	5.333e-08	65.33	2.72866e-05	2	1499.81	0.96088	0
fMEQVIFk	1	B4DXW1	N-Term(TMT10); K8(TMT10)	0.0001551	40.78	0.010115	2	1499.87	-0.250026	0	0.442674	1		1.03145	1		1.083	1		1.07443	1		0.865764	1		1.28147	1		0.849715	1		1.15442	1		1.23389	1
nGQWSEPPk	27	P08603;A8K5T0;B1AKG0;V9GYE7	N-Term(TMT10); K9(TMT10)	0.0001551	42.32	0.00339081	2	1500.82	0.859525	0
vGGVQSLGGTGALR	1	P17174	N-Term(TMT10)	2.088e-09	78.09	1.14489e-06	2	1500.87	1.65545	0	0.869117	1		1.01567	1		0.921087	1		1.08087	1		1.13501	1		1.00528	1		0.884323	1		1.01051	1		1.11873	1
gEIQNILQk	11	P03952	N-Term(TMT10); K9(TMT10)	4.323e-05	54.24	0.000248813	2	1500.92	1.41018	0	1.10238	11	3.72211	0.956649	11	6.26589	0.968468	11	8.20368	1.0894	11	8.77379	0.973007	11	7.95469	0.984297	11	5.44499	0.9923	11	6.89704	1.01619	11	6.04055	0.924867	11	16.3645
yIFHNFmER	9	B2RMS9;B7ZKJ8;B7Z8Q7;B7Z544	N-Term(TMT10); M7(Oxidation)	0.0003972	36.11	0.0066737	3	1501.75	-0.367773	0
acPPGTAAcLVR	1	Q59EZ3	N-Term(TMT10); C2(Carbamidomethyl); C9(Carbamidomethyl)	3.371e-06	42.53	0.00225343	2	1501.78	-1.92113	0	1.11907	1		0.938498	1		0.959213	1		0.94399	1		1.0224	1		0.870471	1		0.932562	1		1.09281	1		1.27023	1
vTAAPQSVcALR	22	P01023	N-Term(TMT10); C9(Carbamidomethyl)	3.832e-05	47.72	0.00117317	2	1501.84	0.559462	0	1.40319	22	16.3153	1.22079	22	16.9728	1.301	22	16.3493	1.40878	22	19.6702	1.40477	22	16.491	0.528033	22	41.3349	0.560071	22	65.7336	0.556117	18	52.6374	0.593126	18	39.9907
sLSSEMYVk	2	P12259	N-Term(TMT10); K9(TMT10)	1.512e-05	46.39	0.00159582	2	1501.84	1.13158	0	1.12773	2	5.30834	0.966988	2	1.17861	1.04902	2	17.1783	0.912633	2	3.6248	1.0541	2	17.5137	0.894715	2	11.0061	1.23058	2	0.615239	1.02246	2	2.01901	0.919083	2	0.258526
vVLIGDSGVGk	3	H3BMH2	N-Term(TMT10); K11(TMT10)	2.903e-06	51.74	0.000427386	2	1501.94	1.06131	0	0.599358	3	7.40853	0.988231	3	9.61552	1.49204	3	9.44475	0.948851	3	13.5564	0.833749	3	11.5376	1.26373	3	13.2563	0.814275	3	18.1876	0.832015	3	0.305822	1.4984	3	25.118
tAAISGYSFk	1	P03951	N-Term(TMT10); K10(TMT10)	1.587e-05	30.18	0.154607	2	1502.86	-1.10337	0	1.01902	1		0.951024	1		1.03177	1		1.02746	1		0.89799	1		0.932833	1		1.11993	1		1.02389	1		1.14117	1
vMPIcLPSk	12	P00739;P00738	N-Term(TMT10); C5(Carbamidomethyl); K9(TMT10)	0.0009577	35.17	0.0221376	2	1502.89	1.78655	0
kPIGADSk	1	Q5JXI8	N-Term(TMT10); K1(TMT10); K8(TMT10)	0.006886	9.1	5.40088	3	1502.95	0.917125	0	0.748467	1		1.21587	1		1.29201	1		1.09482	1		1.14726	1		0.873863	1		0.736017	1		0.959396	1		0.984917	1
aVDAALkk	15	B4E1C2;B4DPP8	N-Term(TMT10); K7(TMT10); K8(TMT10)	0.001024	43.29	0.00154708	2	1502.99	0.145794	1
wNDDAcHk	12	B4DQA0	N-Term(TMT10); C6(Carbamidomethyl); K8(TMT10)	0.0003436	38.89	0.00293752	2	1503.74	1.61915	0	1.11996	12	5.1851	0.949737	12	6.11055	0.988286	12	7.36904	1.09187	12	5.80287	1.07205	12	5.4048	0.927583	12	4.97083	0.999648	12	8.37716	0.961051	12	5.35856	1.00571	12	10.0479
nWGLGGHAFcR	3	P00748;A0A0R7FJH5	N-Term(TMT10); C10(Carbamidomethyl)	3.501e-06	42.58	0.001394	2	1503.75	0.974768	0
tQIDSPLSGk	4	P19320	N-Term(TMT10); K10(TMT10)	1.878e-06	53.1	0.000460882	2	1503.88	2.36603	0	1.28566	4	2.2543	0.955529	4	2.59112	0.953582	4	6.85907	0.938563	4	3.12349	0.923654	4	3.91362	0.963216	4	6.70954	1.20219	4	2.45686	0.959045	4	8.89034	0.926103	4	10.6537
aGVVLVTAAGNFR	1	Q8NBP7	N-Term(TMT10)	1.416e-07	54.44	0.000311723	2	1503.89	3.50079	0	1.28844	1		1.13473	1		0.986156	1		1.02229	1		1.05364	1		0.792877	1		1.0192	1		1.2147	1		0.44463	1
lkEELGk	52	P06727	N-Term(TMT10); K2(TMT10); K7(TMT10)	0.006802	37.82	0.00886278	2	1503.97	0.71305	1	1.34038	26	4.20241	0.878174	26	4.1144	1.09338	26	3.76685	0.817983	26	6.7105	0.87947	26	7.5751	0.958059	26	4.84528	1.20996	26	7.75798	1.06341	26	5.02818	0.973582	26	8.70297
vGFYESDVmGR	19	P01023	N-Term(TMT10); M9(Oxidation)	0.000205	49.21	0.000185323	2	1504.73	0.315179	0	1.50122	19	11.2838	1.28648	19	16.5744	1.38909	19	20.4648	1.39134	19	20.5532	1.41497	19	14.5905	0.490044	18	86.6704	0.626661	19	54.9974	0.414605	18	91.461	0.49927	17	70.6191
sSGQWQTPGATR	11	B4E1Z4;A0A1U9X8W4	N-Term(TMT10)	5.157e-05	47.31	0.000661378	2	1504.77	1.41508	0
eVENSEDPk	3	A0A024QZN4;B4E3Q9	N-Term(TMT10); K9(TMT10)	0.001379	43.63	0.00216972	2	1504.79	1.31327	0
lTYNHGGITGSR	2	Q9Y6R7	N-Term(TMT10)	0.0004303	45.31	0.00179168	2	1504.81	1.98751	0	1.3467	2	7.75566	1.03437	2	2.05899	1.07167	2	6.66838	0.897477	2	1.16603	1.01762	2	2.73952	0.960122	2	5.479	1.25282	2	0.256235	0.676666	2	22.173	1.02084	2	4.79456
nANTFISPQQR	1	P08493	N-Term(TMT10)	6.263e-06	51.77	0.000401825	2	1504.81	1.3319	0	1.04339	1		0.806304	1		0.707909	1		0.601568	1		0.839483	1		1.5109	1		1.65745	1		1.10446	1		1.04652	1
tLNIcEVGTIR	32	P13671;A8K8Z4	N-Term(TMT10); C5(Carbamidomethyl)	1.499e-07	54.9	0.000241886	2	1504.84	1.18988	0
yAVSEAAAHk	14	O75636	N-Term(TMT10); K10(TMT10)	3.046e-07	55.9	0.000216684	2	1504.85	0.830642	0	1.18969	14	13.6143	1.14647	14	9.81599	0.906302	14	8.40889	1.0201	14	1.99762	0.890512	14	13.1244	1.08007	14	7.64452	1.18938	14	9.34211	0.745965	14	20.282	0.836722	14	9.11061
sSGWHFVVk	3	P10643;B2R6W1	N-Term(TMT10); K9(TMT10)	3.796e-05	44.23	0.0033755	2	1504.87	-1.44145	0
hVVPNEVVVQR	18	P06396;B7Z9A0;B7Z992	N-Term(TMT10)	0.0005612	46.31	0.00206519	2	1504.88	3.01793	0
kEEITGTLR	7	Q9Y490	N-Term(TMT10); K1(TMT10)	0.0009684	25.68	0.210368	2	1504.91	0.645201	1	0.615955	7	14.4601	0.967988	7	1.00537	0.918836	7	10.2121	1.13942	7	6.5724	0.874175	7	8.30205	1.13695	7	3.76225	0.975511	7	10.4189	0.947041	7	4.69381	1.45626	7	20.199
fEVQVTVPk	48	P01023	N-Term(TMT10); K9(TMT10)	0.0001071	45.55	0.00224143	2	1504.91	-3.56724	0	1.6078	48	10.0428	1.36728	48	12.4023	1.44283	48	12.3738	1.66947	48	12.8809	1.65346	48	14.6645	0.305917	48	106.344	0.331462	45	120.231	0.32497	33	90.6757	0.349698	29	57.3749
wEAEPVYVQR	28	P25311	N-Term(TMT10)	6.222e-05	58.8	6.46605e-05	3	1505.8	0.631111	0	1.20849	28	5.97147	0.946405	28	6.52968	1.03247	28	7.28514	1.0163	28	7.88868	0.961102	28	8.1853	0.953841	28	5.7376	1.12936	28	5.32923	0.870022	28	7.66312	1.05141	28	5.78545
wSATPPTck	1	Q5R341	N-Term(TMT10); C8(Carbamidomethyl); K9(TMT10)	0.00224	25.78	0.162244	2	1505.82	0.53546	0	0.637853	1		1.00092	1		1.3577	1		1.13284	1		1.39803	1		0.850532	1		0.694992	1		1.09289	1		0.853887	1
fPEVDVLTk	21	C0JYY2;Q59HB3	N-Term(TMT10); K9(TMT10)	0.0001226	47.53	0.00169363	2	1505.9	-0.492002	0
lGVYELLLk	11	B2RMS9;B7ZKJ8;B7Z8Q7;B7Z544	N-Term(TMT10); K9(TMT10)	1.608e-05	50.69	0.000356596	2	1505.97	-0.901313	0
cINQLLck	4	P49908	N-Term(TMT10); C1(Carbamidomethyl); C7(Carbamidomethyl); K8(TMT10)	0.0002529	36.95	0.0158038	2	1506.85	0.717141	0	1.1154	4	5.10318	1.06781	4	8.98385	1.04305	4	4.25923	0.925289	4	0.839384	0.979173	4	1.31185	0.967555	4	6.38084	1.07423	4	7.50878	0.92956	4	10.3435	1.03357	4	5.2892
xALDIEIATYR	12	H6VRF8	N-Term(TMT10); X1(L)	8.992e-07	41.4	0.00579549	2	1506.87	0.978149	0	1.03952	3	10.3197	1.22853	3	6.57908	0.986173	3	6.95003	0.959245	3	25.3996	0.545098	3	27.048	1.11842	3	5.08227	1.17596	3	18.4343	1.23132	3	3.15552	0.689132	3	20.9086
lAEVALAYAk	1	B7Z3I9	N-Term(TMT10); K10(TMT10)	1.63e-05	28.37	0.0895835	2	1506.93	2.09137	0	1.00982	1		0.963433	1		1.09371	1		1.14906	1		0.910229	1		1.03224	1		1.05526	1		0.892614	1		0.971387	1
kDASIGTk	3	Q06033	N-Term(TMT10); K1(TMT10); K8(TMT10)	0.004431	14.95	1.7242	3	1506.95	3.27981	1	1.07378	3	9.0551	0.848811	3	10.1876	1.2561	3	4.40898	0.906628	3	4.96176	0.907169	3	4.08887	0.952831	3	16.7701	1.21861	3	22.8498	0.995861	3	2.43174	1.11733	3	1.63355
dLFNAIATGk	1	P04040	N-Term(TMT10); K10(TMT10)	5.397e-05	40.3	0.00698074	2	1507.89	3.78497	0	0.943234	1		0.977071	1		1.40273	1		1.12194	1		0.871508	1		0.930322	1		0.839604	1		1.1116	1		0.843821	1
aEFQDALEk	64	P0C0L4;P0C0L5;B7Z1F8;A0A0G2JPR0	N-Term(TMT10); K9(TMT10)	1.027e-05	57.52	0.000114084	2	1508.84	0.628584	0
iSVFIQTDk	1	Q6YHK3	N-Term(TMT10); K9(TMT10)	0.000148	41.46	0.00479427	2	1508.91	-0.103581	0	1.10377	1		0.959008	1		0.979706	1		0.896831	1		0.918572	1		1.04872	1		1.22262	1		1.12086	1		0.892788	1
aLFVSEEEk	52	B4E1Z4;H7C5H1	N-Term(TMT10); K9(TMT10)	2.507e-06	56.99	0.000169288	2	1509.86	1.18466	0
aLPGTPVASSQPR	2	O14498	N-Term(TMT10)	0.001007	60.27	7.83259e-05	2	1509.86	1.0291	0	1.2159	2	0.838981	1.01525	2	8.56455	0.983703	2	14.0778	1.08242	2	3.41266	1.14017	2	3.55515	0.908306	2	0.638977	1.06643	2	1.39907	0.875322	2	10.057	0.778201	2	0.398488
rDGYLFQLLR	5	P04196;B2R8I2	N-Term(TMT10)	2.411e-07	44.34	0.00325242	3	1509.88	1.37623	1
tEVIPPLIENR	51	C0JYY2	N-Term(TMT10)	0.007391	49.03	0.00111023	3	1509.89	1.05827	0	1.13573	50	8.74974	0.91111	51	9.49024	0.964178	51	8.79993	1.07232	51	7.77972	0.914394	50	6.47851	1.06695	50	9.37016	1.04457	50	8.23202	1.00121	51	5.66725	0.95213	50	9.53628
yGHSLALYk	4	O75882;B4DZ36	N-Term(TMT10); K9(TMT10)	3.647e-06	53.14	0.000429966	2	1509.89	1.85742	0
wGYcLEPk	11	P00748;A0A0R7FJH5	N-Term(TMT10); C4(Carbamidomethyl); K8(TMT10)	0.004027	27.74	0.0913692	3	1510.81	0.559326	0
hTSLGPLEAk	17	P07357	N-Term(TMT10); K10(TMT10)	0.0009871	51.71	0.000373014	2	1510.9	2.14454	0	1.14123	17	7.09532	0.984663	17	8.9444	1.02218	17	9.04739	0.955548	17	3.77019	0.955381	17	7.24434	0.904815	17	5.81982	1.10266	17	9.46016	0.905574	17	10.7174	1.13289	17	8.77871
sPGPNVAVNAk	2	A0A024RAB6	N-Term(TMT10); K11(TMT10)	0.006362	40.95	0.00550014	2	1511.89	0.0301734	0	1.17143	2	13.0702	1.05172	2	14.2282	1.16204	2	2.81355	0.85456	2	5.38485	0.872435	2	13.0281	0.940383	2	4.92623	1.20845	2	6.07425	0.890593	2	16.626	1.10726	2	0.692571
sccEEQNk	13	P43652	N-Term(TMT10); C2(Carbamidomethyl); C3(Carbamidomethyl); K8(TMT10)	0.0001391	33.83	0.00827999	2	1512.72	1.66303	0	1.11328	13	10.1568	0.834454	13	6.02225	0.907136	13	4.56693	0.808348	13	5.86878	0.828693	13	6.64456	1.00921	13	7.96447	1.18321	13	11.9056	1.30151	13	10.431	1.16028	13	6.55055
lDNIYSSDk	26	C0JYY2	N-Term(TMT10); K9(TMT10)	3.857e-05	43.09	0.00320563	2	1512.83	0.777098	0	1.20444	26	4.08108	0.864098	26	6.93829	0.944163	26	5.4945	1.11805	26	5.0158	0.894308	26	6.9694	1.06567	26	3.26409	1.02869	26	6.05045	0.964562	26	7.97293	0.912472	26	4.99267
gQVVPALNEk	35	P22792	N-Term(TMT10); K10(TMT10)	4.258e-06	59.53	6.34591e-05	2	1512.91	-2.80327	0	1.14756	35	5.76285	1.00496	35	4.40531	0.92102	35	8.13085	0.9733	35	5.03299	0.912418	35	7.66758	0.931873	35	4.01889	1.15273	35	9.45451	0.959235	35	7.84324	1.11846	35	7.40061
lPNNVLQEk	32	P43652	N-Term(TMT10); K9(TMT10)	3.91e-05	55.46	0.000148908	2	1512.92	0.350081	0	1.1693	32	5.92594	0.887876	32	4.96325	0.964504	32	6.86926	0.836203	32	5.82429	0.849023	32	6.76154	0.965607	32	5.81628	1.15871	32	4.9564	1.25628	32	5.84878	1.09937	32	5.59289
cLcAcPFk	8	A0A024R035	N-Term(TMT10); C1(Carbamidomethyl); C3(Carbamidomethyl); C5(Carbamidomethyl); K8(TMT10)	0.0005922	34.91	0.0108962	2	1513.77	1.11542	0	1.10364	8	4.10101	0.936639	8	5.51883	1.19134	8	2.9709	0.877881	8	4.47172	0.934102	8	5.76087	0.884899	8	5.98995	1.17491	8	4.40728	0.935035	8	6.23608	1.1731	8	7.85228
ycFEIVPk	3	Q12913	N-Term(TMT10); C2(Carbamidomethyl); K8(TMT10)	0.00185	27.82	0.10523	2	1513.85	2.33529	0	1.08356	3	2.26279	0.988559	3	7.65434	1.04836	3	6.86328	0.982611	3	4.26575	0.95739	3	0.0439462	0.979818	3	11.2311	1.05736	3	0.547528	1.10046	3	4.99946	0.9024	3	2.15696
vSFELFADk	1	A8K486	N-Term(TMT10); K9(TMT10)	2.393e-05	54.09	0.000240789	2	1513.87	-0.456384	0	0.448662	1		1.05059	1		0.892584	1		1.12499	1		0.806383	1		1.2299	1		0.963485	1		1.09787	1		1.40849	1
kYLYEIAR	5	P02768;F6KPG5	N-Term(TMT10); K1(TMT10)	0.0069	21.5	0.347247	2	1513.91	-1.49308	1
tVQAVLTVPk	4	P36955	N-Term(TMT10); K10(TMT10)	8.169e-06	47.58	0.000567392	2	1513.97	1.29935	0	1.21609	4	3.20458	1.06539	4	4.00288	1.18251	4	2.13558	0.944992	4	2.81092	1.11244	4	15.5174	0.808878	4	6.71842	1.06535	4	5.68747	0.961403	4	6.51741	0.817167	4	13.7712
qTEATMTFk	29	C0JYY2	N-Term(TMT10); K9(TMT10)	3.914e-06	59.67	8.2971e-05	2	1514.83	1.5111	0	1.18651	29	4.96226	0.901435	29	6.63372	0.988266	29	8.81118	1.05476	29	3.04949	0.951424	29	13.483	1.07294	29	7.98239	0.996525	29	6.99118	0.981259	29	5.89514	0.923664	29	7.53721
aINQGGLTSVAVR	1	Q9BZ93	N-Term(TMT10)	8.282e-06	33.01	0.0366275	2	1514.89	1.14675	0	0.949419	1		0.928526	1		0.90731	1		1.06903	1		0.876668	1		1.12834	1		1.05057	1		1.11533	1		1.00194	1
tSGMQFcVk	7	P01031	N-Term(TMT10); C7(Carbamidomethyl); K9(TMT10)	4.454e-06	54.16	0.000350708	2	1515.81	0.331879	0	1.1273	7	3.45691	1.00247	7	5.84831	1.1448	7	2.44551	0.932331	7	2.92742	0.791998	7	4.25493	0.940469	7	5.36524	1.24565	7	2.75193	1.0076	7	5.16495	0.947948	7	7.55326
sSFQVTTck	3	P03950	N-Term(TMT10); C8(Carbamidomethyl); K9(TMT10)	7.06e-06	56.42	0.000142635	2	1515.83	0.708268	0	1.01161	3	1.12885	0.834001	3	13.9759	1.13045	3	0.134746	0.882052	3	3.4564	0.963462	3	16.7644	1.158	3	2.24998	1.12932	3	14.3362	0.97073	3	0.587485	1.2287	3	5.31803
hFVGMLPEk	1	F6RFD5	N-Term(TMT10); K9(TMT10)	0.00205	26.53	0.135955	3	1515.88	0.860601	0	0.723289	1		1.08898	1		1.01504	1		0.994633	1		0.950124	1		1.15978	1		0.842516	1		1.0552	1		1.24277	1
gILNEIkDR	12	B7Z550	N-Term(TMT10); K7(TMT10)	0.004304	21.39	0.498109	3	1515.93	1.19612	1	0.819827	12	9.49984	1.08975	12	2.96444	0.988634	12	4.54228	0.950243	12	4.08656	0.64919	12	7.21282	0.918716	12	7.13413	1.20486	12	5.99377	1.25987	12	4.69677	1.24447	12	5.34809
wDAQIPHQHR	8	P26927	N-Term(TMT10)	0.0005363	40.78	0.00393151	4	1516.8	0.506968	0	1.02343	8	12.9533	1.07806	8	14.3353	1.10353	8	23.3502	0.983585	8	14.8607	1.1061	8	35.0513	0.87929	8	30.3762	1.09905	8	20.4184	0.704637	8	32.7017	1.01494	8	27.128
gPSVFPLAPcSR	3	Q6MZU6;Q5EBM2;P01861;O95978;S6BGF5	N-Term(TMT10); C10(Carbamidomethyl)	0.000594	34.1	0.0210668	3	1516.82	2.25928	0
tQVNTQAEQLR	30	P06727	N-Term(TMT10)	8.891e-07	63.87	2.38534e-05	2	1516.83	2.27927	0	0.954623	30	9.15138	0.740301	30	25.4945	1.26415	30	9.79982	0.904804	30	6.90066	0.883713	30	12.4564	1.15727	30	6.1191	1.17571	30	7.5519	1.19459	30	13.3596	0.926607	30	10.7575
lMVELHNLYR	3	Q6UXB8	N-Term(TMT10)	3.093e-05	53.06	0.000343299	3	1516.85	0.0734733	0	1.10143	3	1.90537	1.01944	3	13.1667	1.19181	3	13.7121	0.976813	3	2.80947	0.883393	3	3.18904	0.939726	3	9.87375	1.26776	3	6.08386	0.966033	3	12.0464	0.871348	3	7.10256
hYGGLTGLNk	2	P18669	N-Term(TMT10); K10(TMT10)	4.602e-05	48.52	0.00110867	3	1517.89	2.29336	0	0.882245	2	14.5865	1.09104	2	4.05559	1.05218	2	18.7478	0.964435	2	4.6116	0.979319	2	2.38975	1.1275	2	0.0245215	0.922165	2	4.74975	0.885424	2	7.45919	1.2309	2	8.19771
eALQDVEDENQ	4	P62258	N-Term(TMT10)	4.46e-05	70.6	1.06258e-06	2	1518.71	0.342911	0	0.3343	3	5.62838	0.970897	4	9.03265	0.620097	4	55.5971	1.00737	4	22.0986	1.52238	4	36.4248	1.17732	4	26.8217	1.07476	4	37.3469	1.20458	4	13.79	1.07865	4	10.6893
sGSDEVQVGQQR	4	P01024	N-Term(TMT10)	4.248e-07	47.3	0.000720628	2	1518.77	0.977919	0	0.870315	4	20.7776	1.08615	4	6.81332	0.899079	4	7.24432	0.918226	4	3.61156	1.12523	4	6.36397	0.915133	4	7.45653	1.00438	4	6.56362	0.98323	4	11.7816	1.15006	4	8.95695
dYIFGNYIER	7	Q06033	N-Term(TMT10)	2.776e-05	39.09	0.00525303	2	1518.78	0.117926	0	1.1688	7	1.65635	0.986109	7	3.24102	1.22129	7	8.5076	0.990851	7	9.29676	0.895388	7	7.18863	0.877873	7	6.7421	1.16389	7	4.98171	0.925238	7	5.39604	0.983557	7	15.0892
mLGATNPTQk	8	Q6LDG4	N-Term(TMT10); K10(TMT10)	3.301e-06	64.02	3.36242e-05	2	1518.87	2.1912	0	1.24109	8	5.68105	0.977667	8	5.91866	1.01081	8	7.96055	0.916207	8	4.46751	0.818304	8	5.68542	0.9196	8	8.13861	1.06487	8	5.09969	1.10824	8	5.42992	1.05878	8	4.98356
vmPIcLPSk	4	P00739;P00738	N-Term(TMT10); M2(Oxidation); C5(Carbamidomethyl); K9(TMT10)	0.003009	21.95	0.537737	3	1518.88	0.425272	0
hPDLSIPELLR	6	P43652	N-Term(TMT10)	5.259e-05	40.14	0.00788662	3	1518.89	0.593628	0	1.37161	6	13.336	1.15003	6	13.0062	1.13984	6	7.70305	1.08301	6	29.4808	1.07239	6	15.6703	0.739629	6	27.3283	0.892442	6	25.9406	0.762986	6	42.8502	0.832324	6	36.1584
kGTVVAEk	5	P31146	N-Term(TMT10); K1(TMT10); K8(TMT10)	0.001141	27.99	0.113978	2	1518.98	1.56647	1	0.410639	5	21.963	0.979938	5	1.32521	0.979035	5	2.49058	1.07402	5	1.92773	0.891088	5	1.98876	1.29714	5	1.23896	0.926977	5	5.79576	1.05618	5	9.10046	1.51365	5	3.53297
sDLEVAHYk	14	B7Z550	N-Term(TMT10); K9(TMT10)	6.197e-06	52.53	0.00050011	2	1519.85	0.644564	0	1.11619	14	10.7359	1.00442	14	3.86646	1.0466	14	7.4004	0.958653	14	3.67643	0.86702	14	5.68853	0.915036	14	6.40358	1.16583	14	5.30519	0.9367	14	6.34018	1.15626	14	2.91122
iTcSGDALPk	7	Q5NV90	N-Term(TMT10); C3(Carbamidomethyl); K10(TMT10)	0.0008171	36.36	0.0209473	3	1519.86	0.771961	0	1.73594	7	4.51214	1.14956	7	4.82187	1.97739	7	8.14704	0.835959	7	6.1283	2.51822	7	18.4659	0.276051	7	36.5684	0.466699	7	39.3876	0.225902	6	69.603	0.33514	6	27.0941
eIGELYLPk	80	P01011	N-Term(TMT10); K9(TMT10)	0.001709	46.01	0.00225049	2	1519.91	-1.86267	0	1.0423	80	7.26775	0.903627	80	7.59022	1.18649	80	6.92449	1.00153	80	5.3581	0.929426	80	6.73144	0.921866	80	7.22125	1.17453	80	7.686	0.935644	80	7.21317	1.09815	80	7.6731
sPDGDSSLAASER	8	P11226	N-Term(TMT10)	5.01e-05	53.85	7.91227e-05	2	1520.74	0.239477	0	1.20341	8	7.38341	0.990333	8	5.61853	0.942417	8	31.9319	0.840234	8	5.27135	1.08262	8	17.8969	0.917951	8	16.5221	1.2079	8	7.84352	0.985754	8	22.6357	0.848037	8	17.1915
aDIGcTPGSGk	11	P01024	N-Term(TMT10); C5(Carbamidomethyl); K11(TMT10)	1.222e-06	70.13	5.29413e-06	2	1520.81	-0.709673	0	1.18636	11	4.56409	1.04921	11	5.04226	1.02655	11	6.31419	0.981606	11	5.06061	0.903812	11	5.75737	0.889147	11	8.31622	0.967312	11	3.4628	1.06661	11	7.34196	1.07201	11	2.83913
aFDIcPLVk	8	P01031	N-Term(TMT10); C5(Carbamidomethyl); K9(TMT10)	0.0002437	39.73	0.0100136	2	1520.9	3.29836	0	1.23623	8	6.73706	0.931911	8	5.0535	1.18408	8	6.91412	0.965068	8	2.30359	0.892023	8	7.34895	0.939583	8	8.53632	1.26828	8	7.82955	0.875813	8	3.35817	0.861745	8	7.01949
gQINDIFQk	2	A8K061	N-Term(TMT10); K9(TMT10)	5.273e-05	40.89	0.00725087	2	1520.89	0.942961	0	1.22814	2	8.53606	1.02527	2	2.06217	0.890634	2	5.74456	0.864392	2	7.70276	0.943963	2	6.94891	1.00251	2	7.25619	1.17571	2	8.50807	0.995199	2	3.99344	1.04863	2	6.42927
dScVGSLVVk	10	P01024	N-Term(TMT10); C3(Carbamidomethyl); K10(TMT10)	5.388e-07	64.54	5.75856e-05	2	1521.87	0.161768	0	1.17235	10	6.87385	1.03531	10	6.68343	1.19519	10	13.7958	0.969646	10	6.28756	1.05644	10	14.4518	0.82626	10	6.68721	0.926148	10	6.92663	0.950786	10	6.62753	0.986769	10	4.76128
rHDWGHEk	8	B4E1C2	N-Term(TMT10); K8(TMT10)	0.0001589	25.19	0.220057	3	1522.83	1.29619	1	1.02127	8	4.99402	1.14192	8	9.82573	1.05859	8	3.86396	0.602805	8	18.577	1.06736	8	5.84628	1.00464	8	11.1437	1.21336	8	9.70548	0.962664	8	6.21442	1.21331	8	4.34601
vGDTYERPk	27	A0A024R462	N-Term(TMT10); K9(TMT10)	0.0003852	26.86	0.167838	2	1522.86	-1.7915	0	1.18556	27	4.91599	0.813746	27	5.87676	0.971053	27	4.05247	0.897728	27	3.8656	1.02718	27	6.68639	1.0563	27	8.74888	1.38634	27	6.11827	1.02157	27	3.62426	0.863804	27	6.46403
cHEGGQSYk	10	A0A024R462	N-Term(TMT10); C1(Carbamidomethyl); K9(TMT10)	4.222e-05	38.73	0.00471566	3	1523.77	1.01782	0	1.08955	10	3.32714	0.955932	10	4.24636	0.937475	10	4.54287	0.880812	10	3.01692	1.04951	10	8.61949	1.08392	10	4.49569	1.44209	10	5.26098	0.877345	10	24.2249	0.946276	10	11.8592
vEDFGNAWk	3	P04275;L8E853	N-Term(TMT10); K9(TMT10)	0.001348	37.95	0.0120564	3	1523.83	0.557835	0
iNDVLEHVk	33	C0JYY2	N-Term(TMT10); K9(TMT10)	4.09e-05	53.61	0.000284607	2	1524.91	-0.0529269	0	1.19661	33	4.86533	0.717742	33	9.95718	0.887312	33	6.32148	1.18516	33	3.6096	0.901091	33	7.39054	1.16228	33	5.35404	1.03805	33	5.92681	1.06054	33	4.23901	0.803675	33	8.60204
iFSQETLTk	2	Q584P1	N-Term(TMT10); K9(TMT10)	3.135e-05	38.01	0.0109739	2	1524.91	0.833885	0	1.13478	2	4.56031	0.980136	2	1.62594	0.945353	2	6.76222	1.05441	2	4.62916	0.928147	2	2.23742	1.19626	2	0.03375	0.920986	2	7.83925	0.95426	2	1.38224	0.908162	2	0.587784
dSGITYLGIk	1	B5BUI8	N-Term(TMT10); K10(TMT10)	3.076e-05	31.19	0.0527666	2	1524.91	0.833885	0	0.849754	1		1.01674	1		0.978102	1		1.05734	1		0.94634	1		1.06062	1		0.995016	1		1.01535	1		1.16178	1
kVFSGDGk	6	P10643;B2R6W1	N-Term(TMT10); K1(TMT10); K8(TMT10)	0.004773	9.22	6.7556	3	1524.94	1.52067	1
vcTAELSck	10	A0A0U1RR20	N-Term(TMT10); C2(Carbamidomethyl); C8(Carbamidomethyl); K9(TMT10)	1.605e-05	43.72	0.00221864	2	1525.81	-1.41782	0	1.04454	10	8.62715	0.918712	10	6.98645	0.957937	10	9.17512	0.959284	10	5.86773	0.941745	10	6.00968	0.915343	10	4.54117	1.12992	10	3.58235	1.02403	10	4.36956	1.21908	10	10.8332
lYHAFSAMk	1	P05155	N-Term(TMT10); K9(TMT10)	0.0006484	26.18	0.18978	3	1525.86	0.464457	0	1.10869	1		1.32945	1		1.3974	1		0.824434	1		1.19924	1		0.996485	1		1.16249	1		0.637611	1		0.620489	1
tLPEPcHSk	26	P03952	N-Term(TMT10); C6(Carbamidomethyl); K9(TMT10)	0.0007104	50.57	0.000601623	2	1526.84	0.144305	0	1.07999	26	5.6676	0.994285	26	5.67751	0.969256	26	7.38431	1.05859	26	9.26087	1.00161	26	10.1855	0.975499	26	5.49506	0.99467	26	6.62071	0.94704	26	5.75001	1.11958	26	5.98448
nYVDWIMk	4	A8K2N0	N-Term(TMT10); K8(TMT10)	0.001107	41.89	0.00456883	2	1526.84	0.145824	0	1.1035	4	12.062	0.988472	4	5.54593	1.04444	4	2.86574	0.912668	4	3.3859	0.778972	4	3.30644	0.952889	4	10.1611	1.22658	4	5.95816	1.25137	4	3.26945	0.793	4	7.41974
vQLTGEPVPMAR	3	B3KSS4	N-Term(TMT10)	4.022e-07	53.97	0.000288824	2	1526.86	0.450528	0	0.962241	3	2.40811	0.973023	3	3.80033	0.900786	3	15.0122	1.0116	3	2.36574	0.851363	3	2.9388	1.03821	3	6.04151	1.08828	3	3.69065	1.26352	3	6.04213	0.887611	3	3.86887
cTEGFNVDk	37	P04004	N-Term(TMT10); C1(Carbamidomethyl); K9(TMT10)	7.302e-06	56.4	9.54146e-05	2	1527.79	0.698171	0	1.06752	37	4.71191	0.979038	37	5.77069	0.913819	37	6.29086	0.927565	37	3.90845	0.841375	37	7.7776	1.03498	37	5.16165	1.16068	37	5.11521	1.09519	37	5.802	1.10884	37	7.41056
hSIFTPETNPR	40	P00747	N-Term(TMT10)	5.782e-05	43.05	0.00256891	3	1527.81	0.371269	0	1.02407	40	12.7639	1.02481	40	6.50018	1.02052	40	10.1047	1.00847	40	5.69483	0.924832	40	12.2943	0.989466	40	6.81863	1.06803	40	9.55503	0.930311	40	10.1083	1.17507	40	10.6929
vGLSDAFVVVHR	3	B4E367	N-Term(TMT10)	1.069e-05	51.16	0.000487685	3	1527.88	-1.84949	0	1.1283	3	1.65067	0.927944	3	8.84046	0.910525	3	5.0948	0.98366	3	6.17543	0.806056	3	19.468	1.0631	3	13.3476	1.24382	3	7.25366	1.04344	3	0.358158	1.07835	3	9.0042
iEIPLPFGGk	6	C0JYY2	N-Term(TMT10); K10(TMT10)	0.0001785	44.83	0.00159657	2	1528.95	1.10446	0	1.20233	6	5.67681	0.839453	6	6.61306	0.93139	6	5.7091	1.18794	6	7.59289	0.863678	6	4.29014	1.09255	6	6.54976	1.03094	6	2.73686	1.01824	6	6.1715	0.909589	6	7.49499
gFcWcVDk	2	A6XND1	N-Term(TMT10); C3(Carbamidomethyl); C5(Carbamidomethyl); K8(TMT10)	0.0002506	34.54	0.0180526	2	1529.76	-0.312215	0	1.17404	2	5.53678	0.831435	2	1.674	0.916506	2	16.5752	0.956564	2	3.06641	1.05256	2	14.1131	1.03587	2	2.35925	0.960304	2	0.950788	1.05223	2	9.60698	1.13077	2	7.65724
aHScPSVWk	9	P07225;Q16519	N-Term(TMT10); C4(Carbamidomethyl); K9(TMT10)	0.0003012	45.56	0.00218763	2	1529.83	-1.1483	0
yEVSVYALk	34	A0A024R462;B4DU16	N-Term(TMT10); K9(TMT10)	1.096e-05	58.5	9.84539e-05	2	1529.9	0.732173	0
qTEATmTFk	10	C0JYY2	N-Term(TMT10); M6(Oxidation); K9(TMT10)	0.001532	41.54	0.00575544	2	1530.83	1.78687	0	1.159	10	3.12282	0.871858	10	7.32489	0.912141	10	7.89031	0.964832	10	8.29892	0.826281	10	6.57941	1.2347	10	7.83757	1.1023	10	5.68399	0.997302	10	7.706	1.01645	10	4.20229
iTHPPPQAALTR	1	P58166	N-Term(TMT10)	0.006424	14.58	2.70136	3	1530.9	0.968031	0	1.09248	1		1.15112	1		1.15598	1		0.845482	1		1.51738	1		0.734995	1		0.983855	1		0.859116	1		0.891932	1
hAFILQDTk	17	B4E1Z4;A0A1U9X8W4	N-Term(TMT10); K9(TMT10)	1.718e-05	54.19	0.000320095	2	1530.91	1.82824	0
gkSSSYSk	3	P02671	N-Term(TMT10); K2(TMT10); K8(TMT10)	0.004994	18.29	1.21789	3	1530.91	-0.0789546	1	1.29448	3	5.29418	1.08957	3	3.83941	1.60098	3	1.62306	1.06761	3	3.63078	1.1952	3	5.51052	0.756815	3	2.24107	1.10099	3	4.68916	0.610692	3	2.08366	0.687863	3	2.77841
gLQSGVDIGVk	3	A0A087X1X5	N-Term(TMT10); K11(TMT10)	9.491e-09	70.33	7.35903e-06	2	1530.93	1.80742	0	0.627908	3	1.81268	1.01098	3	2.85037	1.00718	3	14.8597	0.987817	3	0.764414	0.907512	3	2.31718	1.10894	3	7.28032	0.802562	3	4.75774	1.12653	3	0.247498	1.57553	3	0.207112
tSGmQFcVk	5	P01031	N-Term(TMT10); M4(Oxidation); C7(Carbamidomethyl); K9(TMT10)	0.005308	43.19	0.00230752	2	1531.8	0.619788	0	1.13615	5	4.33266	0.943707	5	8.82653	1.12423	5	10.0096	0.885206	5	2.29653	0.762271	5	5.53542	1.05779	5	6.67707	1.22873	5	0.64293	0.999357	5	13.2778	1.20386	5	5.06905
vTLAVSDLQk	1	I3L3Q4	N-Term(TMT10); K10(TMT10)	1.247e-05	36.48	0.014304	2	1531.94	-1.78231	0	0.797186	1		0.93853	1		1.01396	1		1.07527	1		0.883967	1		1.0784	1		0.974524	1		1.06896	1		1.25338	1
lScAASGFTFSR	1	P0DOX5	N-Term(TMT10); C3(Carbamidomethyl)	2.81e-05	33.91	0.0202409	2	1532.78	2.74659	0	1.34178	1		1.11729	1		1.45091	1		1.04155	1		2.07113	1		0.506608	1		0.624391	1		0.582225	1		0.411377	1
lIVHNGYcDGR	12	Q5VY30	N-Term(TMT10); C8(Carbamidomethyl)	0.0006746	46.32	0.00123323	2	1532.79	1.24025	0	1.32941	12	19.3684	1.02842	12	7.72869	1.02359	12	13.7408	0.993738	12	8.45289	1.05206	12	6.728	0.967282	12	4.2195	0.864237	12	10.5319	0.906582	12	4.78606	1.05898	12	5.49931
nIILPVYDk	16	C0JYY2;Q59HB3	N-Term(TMT10); K9(TMT10)	0.0002432	47.2	0.00139194	3	1532.95	0.623872	0
nEcFLQHk	26	P02768;F6KPG5	N-Term(TMT10); C3(Carbamidomethyl); K8(TMT10)	0.0001133	38.87	0.00863921	2	1533.83	1.69568	0
sVHWYQQk	1	Q6GMV8	N-Term(TMT10); K8(TMT10)	0.00256	22.2	0.425106	3	1533.86	0.528675	0	0.993429	1		1.04122	1		1.51975	1		0.843299	1		2.80967	1		0.499077	1		0.535085	1		0.671259	1		0.309525	1
rPHFFFPk	7	P10909	N-Term(TMT10); K8(TMT10)	0.002201	27.4	0.13211	4	1533.91	3.30278	0	1.03889	7	4.12858	0.859653	7	6.76469	0.942725	7	5.2662	0.912506	7	5.79093	0.82628	7	6.20358	1.05694	7	5.92667	1.48501	7	6.29821	1.20904	7	1.64958	0.816528	7	3.41843
lTPLYELVk	6	P10643;B2R6W1	N-Term(TMT10); K9(TMT10)	8.811e-05	40.17	0.00686591	2	1533.97	1.16008	0
eGDcPVQSGk	46	B4E1C2;B4DPP8	N-Term(TMT10); C4(Carbamidomethyl); K10(TMT10)	3.119e-06	55.37	0.00011529	2	1534.8	1.9932	0
lTFINDLcGPR	5	Q16610	N-Term(TMT10); C8(Carbamidomethyl)	8.772e-08	68.43	8.88568e-06	2	1534.83	1.44559	0	1.13346	5	0.910099	0.959355	5	7.53694	1.03959	5	11.4533	0.96362	5	5.8609	1.02642	5	12.0432	0.983743	5	6.4708	1.1019	5	8.59803	1.0825	5	2.76213	0.910817	5	14.1801
cVNTTLQIk	2	D3DPU2;B4DNA3	N-Term(TMT10); C1(Carbamidomethyl); K9(TMT10)	2.669e-05	48.8	0.00110668	2	1534.9	0.794162	0
gPPASSPAPAPk	5	Q96AF9	N-Term(TMT10); K12(TMT10)	4.819e-06	57.37	0.000157671	2	1534.9	-0.0493251	0	0.635399	5	49.9488	1.01445	5	2.40317	0.858994	5	8.76013	1.16063	5	3.79683	0.932568	5	3.86215	1.20065	5	7.71311	0.935376	5	8.37218	1.14093	5	6.71281	1.15276	5	5.65614
lVGFIDDAVk	12	C0JYY2	N-Term(TMT10); K10(TMT10)	3.005e-07	68.9	9.89376e-06	2	1534.92	0.266499	0	1.22224	12	5.74363	0.602478	12	8.10304	0.811836	12	4.68738	1.24683	12	1.92879	0.859546	12	9.93458	1.20546	12	6.36568	0.984453	12	6.70463	1.14962	12	6.36416	0.696373	12	9.78143
eLPQSIVYk	9	A8KAJ3	N-Term(TMT10); K9(TMT10)	3.242e-05	39.82	0.00804148	2	1534.92	-0.191127	0	1.20096	9	3.31477	0.940943	9	5.03469	1.08215	9	2.67621	0.839535	9	7.59188	0.9071	9	4.6623	0.944747	9	4.37798	1.44236	9	8.29475	0.909093	9	5.13869	1.0071	9	9.51322
eLQVYISPk	1	P19320	N-Term(TMT10); K9(TMT10)	3.075e-05	50.16	0.000768654	2	1534.93	2.19472	0	1.22861	1		1.03235	1		0.995535	1		1.09533	1		1.03558	1		0.767716	1		1.24267	1		0.925752	1		0.780754	1
sTELcGLWQGR	1	P04180	N-Term(TMT10); C5(Carbamidomethyl)	7.384e-06	32.74	0.0767034	2	1535.78	-0.938329	0	1.15834	1		0.981221	1		0.866387	1		1.03797	1		1.33621	1		0.958807	1		0.912199	1		0.917515	1		0.884419	1
iISDYHQQFR	20	C0JYY2;Q59HB3	N-Term(TMT10)	0.0004661	41.44	0.0159494	3	1535.82	-0.567242	0
tMQENSTPRED	7	A8K2N0	N-Term(TMT10)	0.0004482	40.63	0.000986063	2	1536.72	-0.701373	1	0.681097	7	4.82845	1.53296	7	7.46546	0.653742	7	19.0934	0.992142	7	4.65896	0.618984	7	20.5039	0.76922	7	5.72416	0.686439	7	15.6162	0.89457	7	3.43712	2.28384	7	7.86935
eSDEETQIk	26	C0JYY2;Q59HB3	N-Term(TMT10); K9(TMT10)	5.646e-05	53.93	0.000267829	2	1536.82	1.22933	0
eNFQNWLk	4	P37802	N-Term(TMT10); K8(TMT10)	0.0002482	39.63	0.00946825	2	1536.86	2.10824	0	0.493197	4	16.2613	1.0036	4	4.46337	1.00345	4	5.05046	1.09844	4	3.23757	0.83969	4	2.75017	1.16974	4	3.86739	0.892164	4	3.69108	0.991636	4	2.55235	1.55459	4	7.99534
qYNVGPSVSk	40	A0A024R462	N-Term(TMT10); K10(TMT10)	2.577e-05	51.67	0.00059329	2	1536.88	-0.355229	0	1.14243	40	9.7218	0.86102	40	8.9846	0.958376	40	5.67099	0.909035	40	7.23992	1.01239	40	6.43718	1.0416	40	6.8457	1.33303	40	6.5794	1.05008	40	9.07812	0.783781	40	12.4093
lSSGLVTAALYGR	6	P43251	N-Term(TMT10)	5.006e-06	60.78	7.2405e-05	2	1536.9	0.753676	0	1.07599	6	11.1918	0.959572	6	7.61665	1.02844	6	3.73162	1.04446	6	5.98266	0.936732	6	14.2031	1.01981	6	7.71595	1.06287	6	3.90209	1.19521	6	1.87378	0.754365	6	7.89161
lTAFPSESVk	3	P19320	N-Term(TMT10); K10(TMT10)	0.0004914	37.98	0.0122759	2	1536.91	1.77398	0	1.28087	3	0.128839	1.01807	3	4.89693	1.06522	3	0.0578422	0.957002	3	4.82687	0.812896	3	13.9664	0.939042	3	0.28565	1.2988	3	15.2447	0.932263	3	5.58976	0.882703	3	0.0179177
gIQVELYSFPR	2	P19320	N-Term(TMT10)	1.91e-07	49.24	0.00119601	2	1537.86	0.0457223	0	1.21112	2	7.46769	1.04579	2	3.35792	0.959419	2	8.16506	0.950607	2	0.832015	1.00075	2	8.55412	0.910941	2	4.49709	1.31338	2	8.42444	0.956589	2	0.62721	0.804413	2	5.07908
vNVGAGSHPNk	5	P21333	N-Term(TMT10); K11(TMT10)	4.274e-05	45.13	0.00248591	3	1537.89	0.529393	0	0.709475	5	22.4482	0.96482	5	3.22542	1.27249	5	7.04165	0.903512	5	4.52013	0.889632	5	19.2261	1.2061	5	9.41201	0.947732	5	13.4361	0.861069	5	7.95383	1.55986	5	17.4556
sVNDLYIQk	26	P05546	N-Term(TMT10); K9(TMT10)	3.67e-06	58.92	0.000128233	2	1537.9	-0.840513	0	1.04403	26	4.49218	0.985574	26	4.33876	1.05528	26	5.52011	0.942584	26	4.85501	0.943249	26	3.93518	0.932562	26	4.64986	1.08218	26	6.58978	1.06227	26	5.04421	1.06647	26	8.56073
nYNLVESLk	41	P05546	N-Term(TMT10); K9(TMT10)	8.79e-06	58.18	0.000155552	2	1537.9	0.667607	0	0.980289	41	6.13467	1.00902	41	6.26457	1.06936	41	4.45943	0.927078	41	4.45625	0.94408	41	5.64552	0.940097	41	5.50479	1.10743	41	4.1648	1.07351	41	4.28376	1.11572	40	5.22186
gDSGGPLIVHk	40	B4E1Z4;H7C5H1	N-Term(TMT10); K11(TMT10)	1.908e-06	68.77	1.26434e-05	2	1537.91	-0.780335	0
hEVININLk	6	B2R983	N-Term(TMT10); K9(TMT10)	0.0004867	45.37	0.00231741	2	1537.95	1.04977	0	0.646281	6	6.39109	1.11397	6	6.49754	0.955345	6	10.642	1.03024	6	6.8813	1.04284	6	7.42945	1.17861	6	3.88947	0.933265	6	11.919	1.07304	6	5.49046	1.06841	6	4.75672
dLLNNHILk	3	Q15582	N-Term(TMT10); K9(TMT10)	0.007253	23.02	0.394119	3	1537.95	1.59663	0	1.22736	3	11.568	0.979673	3	6.44804	1.07359	3	34.9523	0.928636	3	20.0935	0.882487	3	2.34215	0.951545	3	6.48833	1.20079	3	4.17901	0.952942	3	19.5476	0.983854	3	10.8462
kGGVASGFk	8	P06396;B7Z9A0;B7Z992	N-Term(TMT10); K1(TMT10); K9(TMT10)	0.00103	38.26	0.00615031	2	1537.97	3.24722	1
lLPAQLPAEk	10	Q16610	N-Term(TMT10); K10(TMT10)	8.789e-06	54.25	0.000154845	2	1537.97	0.0820086	0	1.25925	10	4.36634	0.875846	10	12.0682	1.0332	10	5.48723	1.02637	10	7.82829	0.989894	10	9.46186	0.970755	10	9.23803	1.08135	10	9.68789	1.02334	10	4.49011	0.867233	10	8.58106
sHLIIAQVAk	8	P43251	N-Term(TMT10); K10(TMT10)	7.263e-07	64.59	1.13123e-05	2	1537.98	-0.149296	0	1.16281	8	5.84381	0.919672	8	4.35073	0.903649	8	10.3715	1.07965	8	3.22822	0.909869	8	4.45128	0.916149	8	5.33841	1.03389	8	9.66485	1.15319	8	9.02707	0.933316	8	9.24874
mEGMDDDPEDR	1	B7Z2R3	N-Term(TMT10)	0.0002955	37.53	0.000273736	2	1538.63	1.45487	0	0.521248	1		0.883445	1		1.21037	1		1.02783	1		0.716754	1		1.23703	1		1.151	1		0.967605	1		1.51652	1
scDIPVFMNAR	20	P08603;A8K5T0	N-Term(TMT10); C2(Carbamidomethyl)	8.501e-07	52.14	0.000179006	2	1538.77	0.420935	0
qSSSYSFFk	10	B4E1D8;P04003	N-Term(TMT10); K9(TMT10)	4.674e-06	46.54	0.00298791	2	1538.83	1.87249	0
yLDWIHGHIR	2	B4E1C4	N-Term(TMT10)	0.0007842	30.15	0.135489	4	1538.84	-0.598878	0	1.17876	2	18.0913	1.14466	2	7.21958	1.20369	2	11.0998	1.07901	2	5.65633	1.10066	2	6.15702	0.905336	2	16.0669	1.1117	2	26.7294	0.913687	2	15.522	0.353587	2	0.137238
gSTNYNPSLk	2	A2NYU9	N-Term(TMT10); K10(TMT10)	2.66e-05	24.7	0.48658	2	1538.86	-1.07647	0	1.0076	2	8.77191	1.05023	2	0.613608	2.08048	2	5.43758	1.10942	2	2.36117	2.40257	2	1.03288	0.409249	2	5.91932	0.601194	2	2.1564	0.271452	2	32.1583	0.364903	2	34.8129
yLAEVATGEk	4	P61981	N-Term(TMT10); K10(TMT10)	2.772e-05	36.12	0.0178859	2	1538.89	2.0019	0	0.750566	4	20.0203	0.983206	4	7.60779	1.0124	4	6.95952	1.00439	4	5.36991	0.951347	4	3.0721	1.14015	4	6.55069	1.00254	4	3.21278	0.987421	4	1.98142	1.24619	4	6.71596
hAIILLTDGk	19	B4E1Z4;A0A1U9X8W4	N-Term(TMT10); K10(TMT10)	2.085e-06	64.79	2.64686e-05	2	1538.97	1.19195	0
lLGIETPLPk	1	P05362	N-Term(TMT10); K10(TMT10)	0.003895	29.32	0.0264307	3	1538.99	0.857135	0	1.30548	1		0.83347	1		0.932658	1		1.03311	1		0.969036	1		0.962415	1		0.862527	1		1.12512	1		1.01915	1
tLSDYNIQk	8	F5H265	N-Term(TMT10); K9(TMT10)	4.011e-06	51.48	0.000519897	2	1539.88	-0.688649	0	0.816375	8	5.1936	1.0892	8	3.66526	1.12294	8	4.50996	1.09844	8	3.62104	1.04116	8	3.5762	0.999939	8	6.0414	0.935861	8	7.72831	1.00644	8	3.60135	1.01434	8	9.19054
eDQTEYLEER	2	P07900;B4DMA2	N-Term(TMT10)	4.432e-05	53.18	8.27044e-05	2	1540.73	0.992578	0
lVPFATELHER	23	P06727	N-Term(TMT10)	7.604e-06	64.37	2.74196e-05	3	1540.87	-0.111612	0	1.1952	23	12.1065	1.01576	23	14.7975	1.11059	23	15.7009	0.870446	23	11.1938	0.928116	23	15.6532	1.00548	23	8.54039	1.11727	23	17.6188	1.01892	23	11.9891	1.04365	23	21.9797
hPDYSVVLLLR	4	P02768;F6KPG5	N-Term(TMT10)	2.149e-05	44.61	0.0024112	3	1540.9	-1.37462	0
fmQAVTGWk	1	Q53GY3	N-Term(TMT10); M2(Oxidation); K9(TMT10)	0.001909	24.68	0.245945	3	1541.86	0.261115	0	1.12698	1		1.03851	1		1.08902	1		1.15385	1		1.08705	1		0.765789	1		0.949397	1		1.11084	1		0.650474	1
lTPYADEFk	34	P06727	N-Term(TMT10); K9(TMT10)	9.947e-05	34.97	0.0225123	2	1541.86	0.00944597	0	1.23811	34	4.96385	0.943702	34	6.59995	1.04318	34	3.05497	0.816786	34	6.76649	0.844392	34	7.68969	0.997277	34	7.0725	1.20991	34	6.15304	1.08935	34	4.60946	0.999459	34	8.41264
sPFEVYVDk	5	P21333	N-Term(TMT10); K9(TMT10)	0.001189	40.62	0.00615543	2	1541.86	1.11783	0	0.655921	5	11.0964	1.07952	5	6.46438	1.47727	5	5.26107	0.884372	5	6.04769	0.918599	5	5.9548	1.20876	5	2.75658	0.782742	5	7.29902	0.690312	5	23.221	1.58219	5	7.27572
gILTVDELLAIR	1	B4E2S7	N-Term(TMT10)	2.107e-07	52.66	0.00026287	2	1541.95	1.56739	0	1.25183	1		1.05665	1		0.963578	1		1.03233	1		0.917014	1		1.00759	1		0.896522	1		1.02868	1		0.866193	1
nADPILISLk	1	B4DMH3	N-Term(TMT10); K10(TMT10)	0.0002758	41	0.0030105	3	1541.97	1.83033	0	0.482337	1		0.983742	1		1.01284	1		1.02512	1		0.863434	1		1.17979	1		1.06908	1		1.05401	1		1.47951	1
vPPPPPccHPR	26	Q6N041;P0DOX2	N-Term(TMT10); C7(Carbamidomethyl); C8(Carbamidomethyl)	0.0002133	45.53	0.00104402	2	1542.79	2.93123	0
nYVDWImk	7	A8K2N0	N-Term(TMT10); M7(Oxidation); K8(TMT10)	0.003695	38.95	0.0084879	2	1542.84	2.01601	0	1.08678	7	6.22767	0.949537	7	7.19217	0.985408	7	8.2534	0.935993	7	6.97738	0.857015	7	6.39302	0.966927	7	5.62935	1.06632	7	4.37585	1.04455	7	1.51074	1.19466	7	17.0263
aFTYINLDk	1	G3V0E5	N-Term(TMT10); K9(TMT10)	1.676e-05	51.21	0.000545298	2	1542.89	-3.55981	0	0.95302	1		0.949124	1		0.905591	1		1.11443	1		0.827584	1		0.923792	1		1.32087	1		1.08522	1		1.00356	1
yGVSGYPTLk	6	B3KQT9;H7BZJ3	N-Term(TMT10); K10(TMT10)	4.567e-05	29.74	0.0770791	2	1542.9	3.2508	0
gHFSISIPVk	11	P01023	N-Term(TMT10); K10(TMT10)	6.037e-05	35.67	0.0138897	2	1542.94	1.7264	0	1.66748	11	4.30006	1.4356	11	9.19545	1.47108	11	9.40448	1.5874	11	7.11981	1.56407	11	12.5793	0.364478	11	65.3608	0.351176	11	59.8259	0.234968	10	97.1625	0.315749	8	51.7635
tLGSANLPLAk	1	A0A0A0MSN4	N-Term(TMT10); K11(TMT10)	0.001043	38.02	0.0067364	2	1542.97	3.05716	0	1.19169	1		1.04084	1		0.904881	1		0.897262	1		0.94551	1		1.07916	1		0.929473	1		1.19422	1		0.851354	1
dScFNSPMk	2	A8K6K4	N-Term(TMT10); C3(Carbamidomethyl); K9(TMT10)	0.0003568	28.62	0.0469922	2	1543.77	0.224832	0	1.11306	2	7.98053	0.948212	2	14.6058	0.919268	2	3.85857	1.0613	2	0.587327	0.983346	2	1.99409	0.947745	2	0.418485	1.17697	2	4.72625	0.968835	2	10.1586	0.975934	2	6.85001
dFALQNPSAVPR	25	B0AZL7	N-Term(TMT10)	1.825e-06	64.18	2.41007e-05	2	1543.84	0.785429	0	1.1298	25	7.65395	0.9859	25	6.7623	0.950817	25	11.6211	0.988048	25	5.8965	0.979287	25	14.4601	0.989498	25	6.44033	0.989128	25	9.41173	0.989002	25	9.02113	1.09506	25	6.86303
rVDTVDPPYPR	47	P04004	N-Term(TMT10)	0.0007685	33.57	0.0277351	3	1543.84	0.625059	1	1.02958	47	11.4662	0.923152	47	9.5909	0.89594	47	13.3282	0.958611	47	8.97248	0.897335	47	17.9834	1.00869	47	14.3944	1.05368	47	12.7448	1.05753	47	13.5299	1.15424	47	15.7132
fLVGPDGIPIMR	3	A0A087X1J7	N-Term(TMT10)	0.000831	52.16	0.000464615	3	1543.89	5.10087	0	1.02935	3	9.50982	1.18917	3	7.01996	0.921271	3	102.694	1.0017	3	8.54706	0.75312	3	27.2123	1.15738	3	4.70597	1.10769	3	24.3551	1.05802	3	11.0623	1.04164	2	13.7395
sIQcLTVHk	3	O75083;Q53GN4	N-Term(TMT10); C4(Carbamidomethyl); K9(TMT10)	4.584e-05	42.41	0.00403604	2	1543.91	1.60365	0
cFSGQcISk	6	P10643;B2R6W1	N-Term(TMT10); C1(Carbamidomethyl); C6(Carbamidomethyl); K9(TMT10)	1.014e-05	43.88	0.00223866	2	1544.8	0.0615991	0
vAQPTITDNk	5	P21333	N-Term(TMT10); K10(TMT10)	0.0007661	52.66	0.000426555	2	1544.9	-0.185568	0	0.468794	5	17.6258	1.03505	5	12.9498	1.58049	5	7.51333	0.888724	5	17.553	1.06066	5	6.28001	1.20279	5	12.6332	0.722515	5	6.06636	0.737097	5	35.1336	1.77604	5	8.86586
iTQVLHFTk	7	P0C0L4;P0C0L5;A0A0G2JPR0	N-Term(TMT10); K9(TMT10)	2.32e-05	49.89	0.000583083	2	1544.96	1.71444	0
mFLSFPTTk	3	A0A1S5UZ39;U3PXP0	N-Term(TMT10); M1(Oxidation); K9(TMT10)	0.004409	24.61	0.254438	3	1545.88	1.45822	0
iDQNVEELk	34	P06727	N-Term(TMT10); K9(TMT10)	1.98e-05	52.7	0.00043419	2	1545.89	0.675906	0	1.20579	34	7.50804	0.968115	34	7.25034	1.10553	34	9.74627	0.817226	34	8.4757	0.90427	34	11.5277	0.996771	34	7.46413	1.15194	34	5.92172	1.06556	34	8.88668	0.949241	34	6.66043
aTDFVVPGPGk	1	B2R5M8	N-Term(TMT10); K11(TMT10)	0.0002331	41.67	0.00618139	2	1545.9	-2.17405	0	0.919326	1		1.12402	1		0.844554	1		1.03674	1		1.20567	1		1.00469	1		0.874838	1		0.991734	1		1.02031	1
vVSVDENFRPR	5	B2R950	N-Term(TMT10)	8.048e-05	32.99	0.0376506	2	1546.86	1.54994	0	1.12168	5	17.3236	0.931322	5	14.6736	1.02264	5	5.02457	1.26709	5	3.22559	1.19058	5	4.26432	0.80543	5	11.6075	0.859349	5	6.65105	0.903035	5	4.86483	0.788828	5	18.8773
tPcEEILVk	2	P21333	N-Term(TMT10); C3(Carbamidomethyl); K9(TMT10)	0.003721	27.66	0.167882	2	1546.89	1.33363	0	0.72675	2	16.1674	0.843151	2	19.0892	1.2125	2	1.00026	0.937625	2	0.495504	1.02237	2	6.28247	1.20086	2	8.97702	1.04754	2	14.7915	0.954554	2	15.8918	1.25759	2	6.83712
fQMIPLDPk	5	P07996;A0A024R9Q1	N-Term(TMT10); K9(TMT10)	0.006679	25.77	0.245913	2	1546.91	-0.643855	0
gQGSSPVAMQk	12	A0A024QZN4;B4E3Q9	N-Term(TMT10); K11(TMT10)	7.619e-06	76.02	1.99278e-06	2	1547.86	0.45675	0
lDAQASFLPk	63	P19827;B7Z539	N-Term(TMT10); K10(TMT10)	1.593e-05	57.13	0.00014194	3	1547.92	0.925412	0
dAVLLVFANk	2	B4E190	N-Term(TMT10); K10(TMT10)	5.931e-06	61.98	4.69381e-05	2	1547.96	-0.612102	0	0.623266	2	0.989037	1.00311	2	0.711976	0.909442	2	5.08806	1.18898	2	4.70589	0.891683	2	5.83014	1.10599	2	0.167196	0.956745	2	7.03591	1.05542	2	10.078	1.25561	2	12.1804
gNQGFNNNWLR	2	A0A0C4DFP6	N-Term(TMT10)	9.609e-08	49.13	0.000438626	2	1548.79	0.926128	0	1.09762	2	7.13025	0.922217	2	4.95522	1.0158	2	10.1831	1.00085	2	3.03126	1.25341	2	9.6932	1.01332	2	11.3795	0.932293	2	2.13246	1.08854	2	10.576	0.687978	2	21.099
gAVYVYFGSk	1	P80108	N-Term(TMT10); K10(TMT10)	0.0001111	42.49	0.00486137	2	1548.87	-6.41566	0	1.21246	1		0.894391	1		1.02821	1		1.04331	1		0.817395	1		0.779394	1		1.24157	1		1.23565	1		0.83037	1
hGGGGGGFGGGGFGSR	2	P35908	N-Term(TMT10)	0.0001027	42.01	0.00119921	2	1549.75	1.45261	0	0.816517	2	19.6925	1.0269	2	8.29178	1.15944	2	4.83276	0.812565	2	8.1901	0.816787	2	2.72421	1.03392	2	2.56772	1.41436	2	11.4664	1.02718	2	0.333793	1.19261	2	4.19606
fLNEMIAPVMR	1	Q584P1	N-Term(TMT10)	1.134e-05	51.77	0.000700865	2	1549.84	0.167861	0	1.12903	1		1.00547	1		0.944138	1		1.26967	1		0.877176	1		1.00146	1		0.926776	1		1.08214	1		0.629256	1
ySPGGTPTAIk	11	P03952	N-Term(TMT10); K11(TMT10)	1.549e-06	66.5	1.87045e-05	2	1549.9	-0.0528551	0	1.21712	11	11.7562	1.06335	11	4.91059	0.959483	11	14.6384	1.08834	11	4.53099	1.02102	11	10.6729	0.934138	11	6.71578	0.898602	11	12.9438	0.980819	11	9.36507	0.987132	11	12.7622
kPLDVYk	2	Q13822	N-Term(TMT10); K1(TMT10); K7(TMT10)	0.007735	23.23	0.206058	3	1549.99	-1.50133	0	1.13598	2	10.682	0.894417	2	12.2089	1.02747	2	1.84408	0.942233	2	1.66051	0.969656	2	17.1749	0.935025	2	3.40949	1.27063	2	0.98729	0.991987	2	7.33142	1.03033	2	2.18396
lILQNHILk	1	C0IMJ3	N-Term(TMT10); K9(TMT10)	0.0008415	28.75	0.033338	3	1550.02	0.471254	0	1.1441	1		1.01204	1		0.961304	1		0.965545	1		0.837659	1		0.859534	1		1.27038	1		1.15629	1		0.916049	1
kVEFVLk	6	O75882;B4DZ36	N-Term(TMT10); K1(TMT10); K7(TMT10)	0.001624	30.16	0.019373	3	1550.03	2.30338	1
tISPMVMDAk	6	A0A024QZN4;B4E3Q9	N-Term(TMT10); K10(TMT10)	6.154e-05	65.03	2.77464e-05	2	1550.87	4.00434	0
rFTVETPDk	8	P05543	N-Term(TMT10); K9(TMT10)	0.003389	22.86	0.439448	3	1550.89	0.358037	1	0.964984	8	5.10131	0.975625	8	3.43977	0.96423	8	3.63408	0.864727	8	6.99106	1.01708	8	7.68891	1.0254	8	5.63485	1.31067	8	4.43676	0.941402	8	8.36721	1.09912	8	3.71995
nTLIIYLDk	2	P01024	N-Term(TMT10); K9(TMT10)	3.203e-05	53.19	0.00025162	2	1550.96	4.8158	0	1.11701	2	3.4127	1.06027	2	4.2058	1.13973	2	5.09857	0.895098	2	0.250955	1.10061	2	11.2159	0.848239	2	4.19353	0.968156	2	3.19605	1.11328	2	8.62236	0.879139	2	17.3452
aTEDEGSEQk	93	P01008	N-Term(TMT10); K10(TMT10)	7.547e-07	60.84	5.62474e-05	2	1551.79	-0.219559	0	1.02365	93	10.9333	0.940796	93	8.4338	1.01081	93	15.9947	0.999731	93	7.61918	1.02563	93	15.8176	1.01727	93	12.2934	1.11971	93	9.57705	0.952951	93	9.48816	0.971537	93	13.6441
eSQLPTVMDFR	26	C0JYY2;Q7Z7Q0	N-Term(TMT10)	1.02e-06	52.95	0.000393678	2	1551.8	0.214922	0
gDAcDDDIDGDR	3	G3XAP6	N-Term(TMT10); C4(Carbamidomethyl)	2.283e-06	56.2	2.39315e-06	2	1552.64	0.141761	0	0.978137	3	16.7867	0.869318	3	1.53305	0.897846	3	0.0541636	1.01465	3	6.63373	1.06724	3	15.3045	1.05138	3	21.8313	1.01359	3	5.2163	1.1573	3	8.59946	0.959367	3	7.36377
lGVRPSQGGEAPR	41	A0A024R462	N-Term(TMT10)	6.72e-06	61.91	4.56072e-05	3	1552.88	0.539493	0	1.16743	41	8.57876	0.801126	41	10.6291	0.995102	41	6.68554	0.884858	41	9.98342	1.08919	41	10.9529	1.00008	41	9.52642	1.40406	41	8.389	1.03828	41	9.29354	0.849111	41	16.628
qYTGINAISk	2	B4DXW1	N-Term(TMT10); K10(TMT10)	5.886e-07	54.66	0.000222287	2	1552.91	0.795352	0	0.511093	2	18.2997	1.00236	2	1.89162	0.977186	2	4.64894	1.11996	2	5.02194	0.924395	2	9.79567	1.23225	2	6.00332	0.921833	2	2.77979	1.03725	2	5.74878	1.29783	2	11.8347
lPLVPALDGcLR	5	I3L145	N-Term(TMT10); C10(Carbamidomethyl)	0.003136	37.16	0.0122886	3	1552.91	2.47039	0	1.18438	5	5.79798	1.05035	5	2.28246	0.918265	5	9.96101	1.05395	5	3.1301	0.865723	5	16.6453	0.933274	5	4.74538	1.48427	5	25.1983	0.908979	5	18.0028	0.766877	5	18.7264
nLAVSQVVHk	31	P01011	N-Term(TMT10); K10(TMT10)	3.03e-07	69.92	4.54801e-06	2	1552.97	5.73288	0	1.06058	31	15.188	0.951457	31	11.5756	1.22338	31	10.0085	1.01229	31	8.88995	0.955588	31	10.9948	0.954795	31	12.083	1.16539	31	9.35185	0.650114	31	15.8032	1.12098	31	24.0765
lEILQIHTk	1	P55072	N-Term(TMT10); K9(TMT10)	0.0009043	34.06	0.0157254	3	1552.98	-0.645014	0	0.636009	1		1.03513	1		1.06415	1		0.935823	1		0.896609	1		1.29465	1		1.0532	1		0.850516	1		1.45974	1
gNLYWTDWNR	2	P14543	N-Term(TMT10)	0.00407	26.79	0.0686869	2	1553.77	-0.237131	0	1.02623	2	6.20062	1.0134	2	0.632345	1.12127	2	2.24099	1.02694	2	5.11432	1.23627	2	5.77166	0.885458	2	6.78926	1.05468	2	2.91649	1.01871	2	8.70947	0.691316	2	4.21081
vAFTGSTEVGk	1	Q59EJ0	N-Term(TMT10); K11(TMT10)	2.299e-05	28.05	0.10035	2	1553.91	7.21644	0	1.21001	1		1.37198	1		1.1731	1		1.06478	1		1.32987	1		0.690787	1		0.76057	1		0.779954	1		0.661123	1
lHIVQVVck	3	A0A1U9X8Y4	N-Term(TMT10); C8(Carbamidomethyl); K9(TMT10)	0.0002792	31.34	0.0354036	3	1553.96	0.719814	0	0.765965	3	24.3213	1.07097	3	13.5677	1.03321	3	0.434483	1.06818	3	7.38592	0.906531	3	0.39296	1.03049	3	17.0369	0.958479	3	3.42893	1.06959	3	15.1694	1.26241	3	7.3474
scDIPVFmNAR	25	P08603;A8K5T0	N-Term(TMT10); C2(Carbamidomethyl); M8(Oxidation)	0.0003224	46.69	0.00051858	2	1554.76	0.232593	0
rDQALTEEHAR	2	P12814	N-Term(TMT10)	0.0003296	28.86	0.092182	3	1554.81	-3.30109	1	0.93075	2	7.77078	1.0218	2	9.86192	0.984788	2	8.16136	0.968709	2	4.58713	1.0667	2	23.0707	1.0317	2	10.487	1.0438	2	11.3201	0.894691	2	18.9564	1.19731	2	1.4835
nTLYLQMSSLR	1	A0A0J9YX35	N-Term(TMT10)	8.894e-06	26.3	0.167144	2	1554.85	1.53707	0	1.13043	1		1.10334	1		1.21102	1		0.859931	1		2.08884	1		0.678115	1		0.781045	1		0.806192	1		0.508998	1
iYLSDSLTGk	1	B4DSV9	N-Term(TMT10); K10(TMT10)	0.003116	30.19	0.0592982	3	1554.91	-0.918582	0	1.1309	1		0.990146	1		0.847082	1		0.995725	1		0.965456	1		0.980056	1		1.20774	1		1.01313	1		0.981287	1
eNPLTQAVPk	3	P10643;B2R6W1	N-Term(TMT10); K10(TMT10)	7.945e-06	48.4	0.000864373	2	1554.93	-0.255191	0
lFQPLTHLk	6	P22792	N-Term(TMT10); K9(TMT10)	0.0001439	37.92	0.00531124	2	1554.98	3.98765	0	1.12589	6	6.04159	0.968703	6	8.36368	0.928515	6	3.46137	0.956124	6	5.87227	0.897783	6	4.76933	0.868762	6	7.56564	1.15641	6	9.15118	1.09278	6	10.1307	0.868683	6	7.32801
gLMAALcPHk	1	B2R888	N-Term(TMT10); C7(Carbamidomethyl); K10(TMT10)	8.745e-05	35.47	0.0412633	3	1555.88	-0.438074	0	1.17447	1		0.914733	1		1.09662	1		1.06257	1		0.935284	1		0.815624	1		1.1546	1		1.01303	1		0.972975	1
lVGTPGAELLk	1	B4E0K5	N-Term(TMT10); K11(TMT10)	0.0001464	44.19	0.00109937	2	1555.98	0.50553	0	0.649218	1		1.10741	1		1.02124	1		1.09834	1		1.05174	1		0.979198	1		0.882547	1		1.01581	1		1.25546	1
aVEPQLQEEER	3	P55058	N-Term(TMT10)	3.562e-06	49.86	0.000512766	2	1556.81	0.929283	0	1.08734	3	8.54861	0.886914	3	0.830607	0.930163	3	8.12057	0.987566	3	16.7205	1.13693	3	24.4609	0.984729	3	1.91893	1.09118	3	9.09586	0.942357	3	5.88748	1.14201	3	23.3522
xPYQLVLQHSR	4	Q15582	N-Term(TMT10); X1(S)	1.116e-05	36.88	0.0139787	3	1556.87	0.0357617	0	1.16741	2	0.195389	1.02179	2	7.30394	1.19596	2	9.40728	1.07092	2	11.9627	1.21152	2	2.474	0.820677	2	4.02649	0.943352	2	14.0517	0.894747	2	21.222	0.741272	2	14.3731
vLFYVDSEk	26	P10643;B2R6W1	N-Term(TMT10); K9(TMT10)	1.67e-05	51.57	0.00206271	2	1557.89	0.44739	0
sPQGLGAFTPVVR	1	D6W633	N-Term(TMT10)	1.081e-06	45.83	0.00781951	2	1557.9	0.753923	0	1.19114	1		0.98955	1		1.16585	1		0.9648	1		1.05987	1		0.956374	1		1.09688	1		1.00442	1		0.694821	1
lVELAHQYk	20	C0JYY2	N-Term(TMT10); K9(TMT10)	1.059e-05	47.78	0.00128962	2	1558.94	-0.109579	0	1.17471	20	5.43298	0.730415	20	12.8411	0.930977	20	10.6897	1.2424	20	5.46641	0.90239	20	10.4826	1.10695	20	7.98817	1.08185	20	5.55003	1.01812	20	11.6744	0.750395	20	11.8328
nIQSLEVIGk	35	P02775	N-Term(TMT10); K10(TMT10)	6.163e-08	65.38	2.03249e-05	2	1558.96	1.20114	0	0.508145	35	36.2892	1.0538	35	6.44656	0.914551	35	15.5311	1.15067	35	5.0641	0.93574	35	7.94835	1.07268	35	9.00046	0.742586	35	10.459	1.11213	35	9.71632	1.41019	35	12.7015
rLEVDIDIk	114	P02671	N-Term(TMT10); K9(TMT10)	0.0002141	25.74	0.18708	3	1558.96	0.872894	1	1.24214	114	7.3681	0.971187	114	6.62676	1.28478	114	6.90415	0.94021	114	5.27981	1.34542	114	6.72971	0.722283	114	11.5331	1.11432	114	6.57594	0.847995	114	7.11968	0.763425	114	11.0046
kIFQAHk	2	Q9Y490	N-Term(TMT10); K1(TMT10); K7(TMT10)	0.001541	11.65	2.28768	3	1559	0.716864	1	0.562537	2	16.4171	1.07481	2	2.23996	0.998828	2	14.6184	0.986847	2	10.9855	0.685527	2	1.12149	1.13456	2	2.81468	0.968731	2	1.03967	1.10465	2	4.61361	1.61757	2	0.354356
lNMGITDLQGLR	19	P0C0L4;P0C0L5;B7Z1F8;A0A0G2JPR0	N-Term(TMT10)	4.887e-08	63.04	4.08447e-05	2	1559.88	-0.169433	0
kNTPIDGk	9	B7Z550	N-Term(TMT10); K1(TMT10); K8(TMT10)	0.0003282	38.6	0.00701925	3	1559.97	-1.7222	1	1.06827	9	4.25977	1.01759	9	7.95498	1.04926	9	2.38167	0.865592	9	6.58623	0.838358	9	7.01917	0.853163	9	5.1265	1.19475	9	6.82992	1.14947	9	2.00149	1.26789	9	7.68073
qLEEAEEEAQR	1	P35579	N-Term(TMT10)	0.006165	32.63	0.0134529	2	1560.77	1.06163	0	0.553338	1		1.25965	1		1.41888	1		0.757179	1		0.638435	1		1.41369	1		0.499544	1		0.684748	1		2.14726	1
fSGSGSGTDFTLR	3	A0A0X9V9B3	N-Term(TMT10)	1.066e-08	41.85	0.00191041	2	1560.78	-1.67013	0	0.836988	3	11.2627	1.20432	3	0.702864	1.62161	3	0.0693874	1.23228	3	0.177958	1.91219	3	4.31493	0.617754	3	5.30274	0.601922	3	5.81856	0.504978	3	10.9784	0.619856	3	14.4189
aPDVFPIISGcR	5	Q8NF20;P0DOX3	N-Term(TMT10); C11(Carbamidomethyl)	0.0006064	28.8	0.106779	2	1560.84	2.02474	0
gMcTSPPLIk	3	P05160	N-Term(TMT10); C3(Carbamidomethyl); K10(TMT10)	0.0002336	39.73	0.00922612	2	1561.88	-4.06293	0	1.37483	3	6.12776	1.03445	3	5.7973	1.20163	3	2.14798	1.29795	3	4.07446	1.32316	3	17.1839	0.709567	3	2.98556	0.773723	3	14.2132	0.710441	3	18.5642	0.618201	3	16.2505
fVFDRPLPVSR	1	F5GX11	N-Term(TMT10)	0.003459	5.12	27.6387	3	1561.91	0.875253	0	0.906163	1		0.966365	1		0.998202	1		0.987401	1		0.961902	1		1.05953	1		1.14125	1		1.13866	1		0.927629	1
sSGSLLNNAIk	22	P01023;B2R950	N-Term(TMT10); K11(TMT10)	1.047e-07	70.87	6.97741e-06	2	1561.93	0.246486	0
iSEITNIVSk	4	B2R950	N-Term(TMT10); K10(TMT10)	2.82e-06	50.08	0.000712749	2	1561.96	-0.14653	0	1.25273	4	3.99018	0.967459	4	3.10551	1.09532	4	6.0822	1.26703	4	8.07813	1.63077	4	3.77677	0.676148	4	4.09235	0.773561	4	5.12037	0.912312	4	10.9458	0.515927	4	4.30226
eEGTDLEVTANR	1	B2R950	N-Term(TMT10)	4.099e-06	40.01	0.00385112	2	1562.79	-0.1274	0	1.3666	1		0.777229	1		0.951466	1		1.31375	1		1.60067	1		0.661753	1		0.778081	1		0.996988	1		0.433554	1
eHSSLAFWk	26	D9IWP9	N-Term(TMT10); K9(TMT10)	5.489e-06	51.3	0.000596013	2	1562.87	-0.520355	0	1.41349	26	9.13273	0.968628	26	7.84759	1.05644	26	5.27242	1.0097	26	4.47438	0.881992	26	14.5924	0.868834	26	6.39973	1.25274	26	6.22384	0.680948	26	12.1764	1.01015	26	9.16931
iTAIITQGck	2	P12259	N-Term(TMT10); C9(Carbamidomethyl); K10(TMT10)	2.477e-05	42.31	0.00452661	2	1562.93	-0.195709	0	1.24155	2	2.55904	0.913924	2	6.27995	1.06125	2	9.96535	0.981048	2	11.5388	1.07472	2	1.75846	0.833181	2	6.5738	1.22524	2	4.83608	0.975283	2	22.93	0.846048	2	1.93867
lVAIVDPHIk	1	A0A024R592	N-Term(TMT10); K10(TMT10)	0.004434	19.42	0.551439	3	1563	0.21947	0	0.958586	1		0.949998	1		0.939844	1		1.05099	1		0.841737	1		0.947472	1		1.03635	1		1.28971	1		0.998043	1
dSYDLHDLk	21	C0JYY2	N-Term(TMT10); K9(TMT10)	0.0001271	45.69	0.00174004	2	1563.84	1.19724	0	1.26192	21	7.05415	0.930608	21	5.59707	0.963585	21	5.75447	1.12351	21	6.52296	0.974253	21	5.63805	1.1441	21	5.36264	0.90733	21	5.08276	0.844433	21	18.1159	0.852125	21	10.0195
lNILNNNYk	2	U5LGU2	N-Term(TMT10); K9(TMT10)	0.0003378	23.7	0.345743	2	1563.93	-0.529995	0	1.05834	2	8.37834	0.981716	2	12.2771	0.887905	2	8.95605	1.29582	2	14.935	1.51214	2	32.639	0.773175	2	7.9804	0.844868	2	24.768	0.862275	2	24.5276	0.621447	2	3.74564
lSHNAIASLRPR	3	B0AZL7	N-Term(TMT10)	3.362e-05	36.16	0.0192835	3	1563.93	1.05464	0	1.0324	3	6.51799	0.923018	3	15.4737	0.979816	3	1.19432	1.06492	3	1.11088	1.05184	3	4.43914	0.942609	3	2.4946	0.983056	3	18.7709	0.839377	3	15.4514	1.18495	3	18.4533
sLGEISALTSk	8	A0A024QZN4;B4E3Q9	N-Term(TMT10); K11(TMT10)	3.945e-07	62.66	4.46338e-05	2	1563.94	0.307938	0
eNSQYQPIk	21	P01031	N-Term(TMT10); K9(TMT10)	1.396e-05	41.21	0.00641794	2	1564.88	1.03163	0	1.15429	21	18.6719	0.938195	21	11.9519	0.99213	21	12.543	1.03104	21	7.75303	0.991096	21	28.8424	0.912738	21	5.46641	1.14158	21	9.31075	0.958798	21	11.3794	1.02163	21	9.81304
vSHVLAALQAGNR	2	Q9Y490	N-Term(TMT10)	1.569e-05	46	0.00206854	3	1564.91	-0.59128	0	0.716979	2	21.7297	0.924212	2	12.7748	0.910961	2	0.245007	1.02675	2	8.07378	0.949807	2	3.95609	1.0587	2	7.66266	1.06006	2	9.74422	1.37129	2	17.6657	0.922691	2	30.0728
vLEYLNDLk	1	B2R7D2	N-Term(TMT10); K9(TMT10)	0.001136	7.03	14.3859	2	1564.93	-0.23344	0	1.19644	1		0.957571	1		0.899079	1		1.03099	1		0.896273	1		0.867169	1		1.13269	1		1.02759	1		1.11425	1
aIDLFTDAIk	1	F6VDH7	N-Term(TMT10); K10(TMT10)	0.0007275	24.71	0.249661	2	1564.94	0.533814	0	0.538119	1		1.0807	1		1.21588	1		1.18806	1		0.79644	1		1.11399	1		1.02773	1		0.98133	1		1.11063	1
vQHIQLLQk	15	P02671	N-Term(TMT10); K9(TMT10)	7.716e-06	54.79	0.000158977	2	1564.99	-0.709172	0	1.29369	15	5.93284	0.971628	15	3.37735	1.40849	15	5.31055	0.968508	15	2.36154	1.35814	15	7.87283	0.643326	15	8.82208	1.05801	15	8.83031	0.811613	15	8.49446	0.698164	15	15.0148
lDVQFSGLTk	1	P21333	N-Term(TMT10); K10(TMT10)	0.0001281	36.74	0.015051	3	1565.93	-0.800802	0	0.804516	1		1.09219	1		1.31321	1		0.881119	1		0.908059	1		1.14931	1		0.880512	1		0.726579	1		1.56219	1
tIAQDYGVLk	4	A0A0A0MSI0	N-Term(TMT10); K10(TMT10)	1.471e-06	49.15	0.000865924	2	1565.93	1.00711	0	0.743463	4	5.14353	0.972008	4	5.72764	1.15833	4	6.98623	1.01	4	3.31524	0.897117	4	15.368	1.02681	4	4.48271	0.980004	4	13.5991	1.03858	4	0.855314	1.34557	4	3.94922
kPVDEYk	14	B4E1B2;Q53H26;C9JVG0	N-Term(TMT10); K1(TMT10); K7(TMT10)	0.003864	24.71	0.217545	3	1565.95	0.986805	0
cDSSPDSAEDVR	11	P02765;B7Z556	N-Term(TMT10); C1(Carbamidomethyl)	0.0005207	65.64	7.91404e-07	2	1566.69	1.14188	0
fYNQVSTPLLR	11	A2RTY6	N-Term(TMT10)	4.801e-06	61.62	5.56775e-05	2	1566.88	0.402023	0	1.0861	11	12.2895	0.9462	11	7.90098	0.946461	11	8.87169	1.01693	11	4.37059	1.03147	11	23.2751	0.813828	11	19.3074	1.09085	11	13.3126	0.987816	11	16.3283	0.829242	11	12.8894
yVLPNFEVk	20	P0C0L4;P0C0L5;B7Z1F8;A0A0G2JPR0	N-Term(TMT10); K9(TMT10)	3.248e-05	49.54	0.00082824	2	1566.93	1.62815	0
aLTQTGGPHVk	3	P21333	N-Term(TMT10); K11(TMT10)	7.102e-05	33.95	0.0288547	3	1566.94	1.45236	0	0.860078	3	8.28153	1.02104	3	1.85684	1.39779	3	1.78239	0.924924	3	0.300404	1.20401	3	3.50263	0.943932	3	6.30724	0.629875	3	20.9112	0.576438	3	35.9364	1.4632	3	16.264
dAEAWFNEk	14	P13645	N-Term(TMT10); K9(TMT10)	1.473e-05	49.78	0.000978325	2	1567.82	0.769752	0	0.837518	14	6.3367	0.911369	14	3.60398	1.061	14	7.47288	0.787523	14	5.80514	0.760247	14	10.8619	1.22567	14	5.40861	1.28986	14	5.62764	1.4355	14	6.4791	0.843879	14	10.7279
nSLYLQMNSLR	1	Q96K68;Q6MZU6;V9HW68;Q6N089;Q9HCC1;Q0ZCH9;S4R460;B6EDE2	N-Term(TMT10)	2.552e-05	38.85	0.00931113	2	1567.85	4.24252	0
lSITGTYDLk	19	P01009	N-Term(TMT10); K10(TMT10)	4.066e-07	69.09	6.79441e-06	2	1568.93	-0.100789	0	0.417565	19	73.8109	0.374223	19	54.5632	0.38094	19	69.9526	0.748856	19	12.5832	5.32096	19	21.6709	0.364561	19	43.7724	0.887706	19	9.28002	0.279112	19	51.8786	0.542038	19	10.9866
wSHPPScIk	15	P08603;A8K5T0	N-Term(TMT10); C7(Carbamidomethyl); K9(TMT10)	0.0005715	40.99	0.00546563	2	1569.87	2.58154	0
lkGPLLNk	1	P01024	N-Term(TMT10); K2(TMT10); K8(TMT10)	0.005864	10.39	1.43516	3	1570.07	0.502067	1	1.05025	1		1.14548	1		0.988132	1		0.940258	1		0.965984	1		0.788096	1		0.869253	1		1.22031	1		1.10062	1
sDVVYTDWk	12	P02763	N-Term(TMT10); K9(TMT10)	9.273e-05	38.18	0.00872794	2	1570.85	0.989133	0	0.45867	12	36.362	0.407618	12	38.1863	0.48015	12	25.2062	0.813469	12	4.99188	5.73156	12	17.5105	0.288415	12	59.11	0.61944	12	24.1758	0.308287	11	115.195	0.232396	12	69.5005
dLkPAIVk	18	P01023	N-Term(TMT10); K3(TMT10); K8(TMT10)	0.003039	30.21	0.0145301	2	1571.05	2.01832	0	1.75758	18	4.38274	1.36339	18	6.1447	1.57418	18	5.7455	1.79212	18	3.18982	1.66267	18	7.93276	0.206053	18	21.0737	0.18509	18	26.0673	0.178216	8	70.6736	0.167302	6	48.1122
dNTINLIHTFR	1	O15144	N-Term(TMT10)	0.0001997	26.97	0.138828	3	1572.87	1.12453	0	1.17599	1		0.987894	1		1.01153	1		0.75601	1		0.959224	1		0.991835	1		1.12422	1		0.88803	1		1.44873	1
qLGcPTAVTAIGR	4	F5GZZ9	N-Term(TMT10); C4(Carbamidomethyl)	8.852e-06	53.72	0.000294898	2	1572.87	0.37222	0	1.05478	4	9.14267	1.03154	4	5.22324	0.976649	4	8.24014	0.92603	4	8.45944	1.01683	4	8.04763	0.91187	4	2.63479	1.14972	4	5.31557	1.03437	4	4.48417	1.11495	4	4.42178
aGHIAWTSSGk	10	C0JYY2	N-Term(TMT10); K11(TMT10)	3.077e-07	65.69	1.74274e-05	2	1572.89	0.494185	0	1.19023	10	3.46213	0.914995	10	11.2063	1.00614	10	6.33308	1.1528	10	6.6184	0.877635	10	8.50029	1.10804	10	3.94385	1.20234	10	8.33695	0.625272	10	8.55902	1.03353	10	12.2429
fEDccQEk	52	P02774	N-Term(TMT10); C4(Carbamidomethyl); C5(Carbamidomethyl); K8(TMT10)	0.0005279	38.32	0.00163427	2	1573.74	1.04017	0	1.13543	52	6.24995	0.933621	52	6.0854	0.907155	52	7.36915	0.978291	52	4.13152	0.899896	52	5.96641	0.954202	52	5.87505	1.12014	52	7.03957	1.02564	52	5.6815	1.15721	52	6.34193
cSVFYGAPSk	16	P0C0L4;P0C0L5;A0A0G2JPR0	N-Term(TMT10); C1(Carbamidomethyl); K10(TMT10)	1.409e-05	55.31	0.000209054	2	1573.85	0.999999	0
cFLAFTQTk	5	P05452;B2R582	N-Term(TMT10); C1(Carbamidomethyl); K9(TMT10)	6.891e-05	44.72	0.00232728	2	1573.89	3.0858	0
nQFNDYTSk	6	A0A024CIM4	N-Term(TMT10); K9(TMT10)	0.001371	32.94	0.0242138	3	1574.82	0.653164	0	1.07707	6	12.0301	0.817559	6	3.04345	0.9763	6	7.17357	0.904614	6	2.32315	1.04795	6	10.958	1.05208	6	2.69092	1.05651	6	4.21177	1.11249	6	6.51126	1.09937	6	4.9646
fcEAEFSVk	18	Q16610	N-Term(TMT10); C2(Carbamidomethyl); K9(TMT10)	0.0008943	42.8	0.00265815	3	1574.83	0.124721	0	1.13295	18	5.18919	0.923141	18	3.2675	1.02078	18	7.88204	0.944541	18	5.2206	0.955913	18	6.34723	0.994157	18	4.95942	1.14793	18	7.98224	1.05634	18	4.1836	0.930052	18	9.11644
qTVSWAVTPk	16	P01023	N-Term(TMT10); K10(TMT10)	3.381e-06	59.22	8.56866e-05	2	1574.93	-0.299645	0	1.54951	16	11.1983	1.40821	16	12.8845	1.50702	16	8.8291	1.62783	16	16.6467	1.51368	16	18.579	0.364502	16	72.2554	0.420775	15	72.7038	0.427647	11	84.3047	0.401237	11	80.5182
sLQEQADAAEER	3	H7BYY1	N-Term(TMT10)	2.752e-08	53.65	0.00011802	2	1575.78	-0.2881	0	0.38762	3	38.6905	0.866945	3	6.48715	0.916745	3	9.79761	1.01385	3	0.0574255	1.29551	3	6.69874	1.18786	3	2.02514	1.0391	3	13.2811	1.04057	3	8.5357	1.37685	3	22.5683
lNmGITDLQGLR	20	P0C0L4;P0C0L5;B7Z1F8;A0A0G2JPR0	N-Term(TMT10); M3(Oxidation)	0.003265	53.32	0.00044091	2	1575.88	2.59429	0
tLLSNLEEAk	45	P10909	N-Term(TMT10); K10(TMT10)	1.903e-07	66.69	1.56217e-05	2	1575.94	-0.314078	0	1.04903	45	4.86217	0.847505	45	6.45995	0.839191	45	8.65543	0.92844	45	5.9235	0.833918	45	7.37273	1.11579	45	7.80185	1.34244	45	5.93493	1.08461	45	5.8751	1.09561	45	5.91193
sADTLWGIQk	4	P00338	N-Term(TMT10); K10(TMT10)	3.798e-06	36.77	0.0173982	2	1576.91	2.70583	0	0.804718	4	3.83237	1.0659	4	2.91292	0.995012	4	0.70046	1.19048	4	3.14004	0.844179	4	6.45249	0.957599	4	11.6782	0.94084	4	9.52232	1.04046	4	4.02624	1.16567	4	16.0543
sTVEGIQASVk	13	A0A024QZN4;B4E3Q9	N-Term(TMT10); K11(TMT10)	7.549e-09	77.3	1.41332e-06	2	1576.93	1.07269	0
tPEGLTLLFk	1	P09172	N-Term(TMT10); K10(TMT10)	0.002681	3.67	32.8595	2	1576.97	-0.633314	0	0.737322	1		0.982385	1		1.00237	1		1.24233	1		1.16816	1		0.870601	1		0.96318	1		1.12817	1		0.846779	1
acGAcPLWGk	4	P10643;B2R6W1	N-Term(TMT10); C2(Carbamidomethyl); C5(Carbamidomethyl); K10(TMT10)	9.385e-07	49.97	0.00269858	2	1577.83	0.526509	0
eAcNAWLQk	15	Q9NZP8;Q9H804	N-Term(TMT10); C3(Carbamidomethyl); K9(TMT10)	1.797e-05	53.85	0.000294032	2	1577.85	2.1995	0
gmcTSPPLIk	3	P05160	N-Term(TMT10); M2(Oxidation); C3(Carbamidomethyl); K10(TMT10)	0.0006069	33.27	0.0386437	3	1577.88	2.36433	0	1.11291	3	12.7004	0.974851	3	0.950415	1.10673	3	0.918503	0.843005	3	1.7974	1.02259	3	6.07813	0.949188	3	4.9523	1.04066	3	10.0089	0.909582	3	5.35961	1.56347	3	5.68485
gPVLQLHDLk	6	B3KXZ9	N-Term(TMT10); K10(TMT10)	2.905e-06	53.43	0.00028621	2	1577.98	-0.175268	0	1.10606	6	9.80161	0.956733	6	4.81229	0.999084	6	5.00518	1.0617	6	7.07857	0.988104	6	8.44719	1.00587	6	1.54722	1.15437	6	6.94398	0.927354	6	4.97611	0.914241	6	16.7103
wLPSSSPVTGYR	6	A0A024R462;B4DU16	N-Term(TMT10)	1.55e-05	48.64	0.00103947	3	1578.85	-0.0328483	0
iTcGGNNIGSk	3	A0N5G3	N-Term(TMT10); C3(Carbamidomethyl); K11(TMT10)	9.819e-08	54.18	0.000331337	2	1578.87	1.79721	0	0.900239	3	2.70471	1.11143	3	0.965962	1.19936	3	5.89844	0.475419	3	18.0767	5.14842	3	1.25783	0.140737	3	16.9923	0.375141	3	23.5454	0.0783261	3	2.01203	0.12744	3	13.8977
yGPSLMPGGNk	2	P52209	N-Term(TMT10); K11(TMT10)	1.371e-06	61.89	6.15109e-05	2	1578.87	1.33478	0	0.706633	2	16.1278	1.01514	2	4.57923	1.09414	2	9.22966	1.01788	2	3.14661	0.966345	2	8.88719	1.01482	2	10.0369	0.981175	2	9.27588	1.07758	2	5.78817	1.22994	2	11.4031
qFPILLDFk	7	P05546	N-Term(TMT10); K9(TMT10)	4.969e-05	43.67	0.00324515	2	1578.97	0.441493	0	0.956809	7	3.58184	1.06854	7	5.91071	1.05168	7	7.66096	0.952998	7	6.42308	0.879892	7	5.385	0.998686	7	3.48774	1.15174	7	6.58959	1.08538	7	4.69789	0.942668	7	3.91124
qVEGMEDWk	31	P25311	N-Term(TMT10); K9(TMT10)	7.957e-06	49.74	0.00103993	2	1579.82	-1.14378	0	1.18948	31	6.91785	0.991858	31	7.1372	1.0557	31	7.59962	0.965988	31	3.64344	0.922123	31	7.2406	0.978138	31	7.17963	1.15195	31	4.1423	0.855823	31	5.61204	1.06648	31	8.7718
qEYEQLIAk	12	P35527	N-Term(TMT10); K9(TMT10)	3.924e-06	50.75	0.000660916	2	1579.91	0.449784	0	1.05093	12	4.18338	1.02666	12	4.29179	0.858609	12	14.428	0.971054	12	7.53037	0.933076	12	6.27027	1.14701	12	7.08217	1.13652	12	8.31086	0.93288	12	7.84146	1.042	12	5.00508
hAEMVHTGLk	7	D3DPU2	N-Term(TMT10); K10(TMT10)	3.194e-07	61.04	6.73711e-05	2	1580.9	-0.458406	0	0.497499	7	8.29373	0.969747	7	3.97703	0.994807	7	7.34143	1.05477	7	3.97133	0.774733	7	8.60429	1.17377	7	8.53876	0.960954	7	2.83023	1.04031	7	6.2496	1.57744	7	7.36462
sLFTDLVAEk	9	B2R950	N-Term(TMT10); K10(TMT10)	1.305e-06	56.14	0.000197981	2	1580.93	1.04554	0	1.25172	9	6.02213	0.920618	9	2.15301	1.0935	9	6.37789	1.2565	9	2.99004	1.33798	9	3.1056	0.716144	9	4.77394	0.806161	8	5.11153	0.972456	9	7.98344	0.584012	9	3.61849
vLSYVDWIk	3	Q9NZP8	N-Term(TMT10); K9(TMT10)	1.775e-05	46.15	0.00189397	2	1580.95	0.748559	0	1.18008	3	8.64562	1.14963	3	18.638	1.06837	3	3.33099	0.917032	3	4.05482	0.855907	3	0.279701	0.966787	3	0.0300099	1.2255	3	3.01504	1.12359	3	12.9066	0.572802	3	8.93886
vNHVTLSQPk	4	H0YLF3	N-Term(TMT10); K10(TMT10)	6.812e-05	25.43	0.20665	3	1580.95	-0.0756536	0	1.23716	4	3.13273	1.26426	4	1.72344	1.0707	4	7.37948	0.854515	4	4.39894	1.04111	4	7.90948	0.897862	4	11.006	1.20026	4	4.86528	0.603227	4	20.3984	1.15839	4	12.7828
nVHSGSTFFk	6	B2RMS9;B7ZKJ8;B7Z8Q7	N-Term(TMT10); K10(TMT10)	6.218e-06	54.39	0.000563704	3	1581.88	2.94257	0
cVcPVSNAMcR	1	A8KAJ3	N-Term(TMT10); C1(Carbamidomethyl); C3(Carbamidomethyl); C10(Carbamidomethyl)	9.923e-07	40.06	0.000877789	2	1582.72	0.659192	0	1.16041	1		0.871726	1		1.10393	1		0.720558	1		1.11935	1		1.01671	1		1.5125	1		0.868606	1		1.03246	1
lVYPScEEk	9	V9GYE7	N-Term(TMT10); C6(Carbamidomethyl); K9(TMT10)	0.0005105	46.13	0.00177716	2	1582.85	-0.301634	0	1.32179	9	4.8149	1.0416	9	3.48894	0.992109	9	8.3919	0.843703	9	3.62178	0.949216	9	3.5107	1.03038	9	6.32759	0.999555	9	6.42835	1.06893	9	7.28846	0.844939	9	5.22814
aSEFLGYWEPR	7	P12259	N-Term(TMT10)	3.54e-07	68.66	5.47301e-06	2	1583.8	-0.939859	0	1.06189	7	8.59822	0.928544	7	15.5923	1.00428	7	7.26994	0.908655	7	4.18942	0.942577	7	24.1833	0.964981	7	9.98921	1.28483	7	6.83621	1.10548	7	5.09869	0.950323	7	1.78811
eDIFMETLk	16	P25311	N-Term(TMT10); K9(TMT10)	3.303e-05	50.64	0.000662768	2	1583.87	-0.55807	0	1.35289	16	5.10613	0.871704	16	4.29118	1.10732	16	4.43271	0.952483	16	3.95718	0.989423	16	6.24611	0.928357	16	4.64829	1.21737	16	4.50619	0.951425	16	3.63726	0.837851	16	4.369
kASYLDcIR	7	B4E1B2;Q53H26	N-Term(TMT10); K1(TMT10); C7(Carbamidomethyl)	0.007284	30.85	0.0636827	2	1583.9	0.454536	1
cIEGTcVck	10	G3XAM2;Q6LAM1	N-Term(TMT10); C1(Carbamidomethyl); C6(Carbamidomethyl); C8(Carbamidomethyl); K9(TMT10)	1.755e-05	44.72	0.00111305	2	1584.8	3.37027	0
tPLGDTTHTcPR	45	Q5EBM2	N-Term(TMT10); C10(Carbamidomethyl)	0.0001714	58.64	4.84176e-05	2	1584.8	1.54758	0	1.03413	45	13.765	1.27821	45	7.65066	1.48523	45	17.4485	0.977833	45	6.30274	3.02674	45	32.8422	0.405873	40	83.5511	0.511232	45	39.6804	0.409541	37	73.9563	0.480471	36	62.4301
dADPDTFFAk	34	P43652	N-Term(TMT10); K10(TMT10)	5.729e-06	60.68	4.82685e-05	2	1584.83	0.645841	0	1.14988	34	7.09754	0.850884	34	6.54798	0.943798	34	6.90173	0.855674	34	7.22319	0.825745	34	8.55184	1.01245	34	5.58774	1.17508	34	5.98726	1.24411	34	4.62335	1.08203	34	8.73963
iMQSSQSMSk	6	O75882;B4DZ36	N-Term(TMT10); K10(TMT10)	2.39e-07	54.29	0.00025453	2	1584.85	1.63094	0
iYLYTLNDNAR	43	A0A024R462;B4DU16	N-Term(TMT10)	4.478e-05	64.35	2.61321e-05	3	1584.86	0.473655	0
fDVSGYPTIk	4	P13667	N-Term(TMT10); K10(TMT10)	0.001981	22.97	0.325002	3	1584.91	1.60255	0	0.841308	2	20.5656	0.89681	2	7.07371	0.934229	2	15.7254	1.12381	2	6.24767	1.0655	2	7.03171	1.02047	2	14.8102	0.963382	2	6.85819	1.04249	2	4.85865	1.12719	2	16.6395
skLPGIVAEGR	11	P01008	N-Term(TMT10); K2(TMT10)	0.00213	55.47	0.000103584	2	1584.99	1.76946	1	0.923428	11	6.70894	1.03613	11	5.53221	0.913826	11	4.91448	1.07589	11	7.26583	0.766771	11	12.3042	0.935914	11	7.07137	1.02554	11	7.04467	0.905596	11	8.72202	1.4845	11	9.21354
hHPEHFSGRPR	8	A0A024R462;B4DU16	N-Term(TMT10)	0.002692	20.01	0.546241	3	1585.83	0.425763	0
tGESAEFVck	21	B1AKG0	N-Term(TMT10); C9(Carbamidomethyl); K10(TMT10)	5.058e-07	45.37	0.00158995	2	1585.83	0.518741	0	1.22571	21	6.37604	0.931392	21	5.89075	1.13099	21	5.34191	0.715647	21	13.6501	1.0692	21	6.83441	0.908663	21	5.09343	1.18755	21	9.41028	0.914912	21	6.94906	1.26759	21	7.69945
vFDLELHPAcR	5	A4D2D2	N-Term(TMT10); C10(Carbamidomethyl)	0.0001172	26.65	0.123167	3	1585.83	-1.09513	0	1.06659	5	5.22729	1.04343	5	4.87274	0.997836	5	3.35705	0.875334	5	2.68017	1.08791	5	17.1729	0.972394	5	1.56565	1.07715	5	4.46384	0.973994	5	6.01468	1.0613	5	8.36777
iAWESPQGQVSR	4	A0A024R462	N-Term(TMT10)	2.343e-05	38.37	0.0107413	2	1586.85	0.333701	0	1.16294	4	2.73773	0.87243	4	3.38836	1.20249	4	11.1116	0.865594	4	1.72748	1.06695	4	1.13211	0.907928	4	5.36124	1.28678	4	4.76699	1.04102	4	7.40785	0.845351	4	7.52008
nNLELSTPLk	24	P07225;Q16519	N-Term(TMT10); K10(TMT10)	3.405e-06	53.5	0.000285207	2	1586.95	1.00283	0
kQHLFVk	4	C0JYY2	N-Term(TMT10); K1(TMT10); K7(TMT10)	0.002682	38.48	0.00447003	2	1587.04	3.06559	1	1.15599	4	6.07085	0.855381	4	2.49178	0.944375	4	4.51002	1.07258	4	3.12286	0.871901	4	3.8808	1.03711	4	4.12972	1.0595	4	5.92448	1.08885	4	11.7008	0.829512	4	4.69802
tWQDcEYk	35	B4E1C2;B4DPP8	N-Term(TMT10); C5(Carbamidomethyl); K8(TMT10)	8.999e-05	41.51	0.00204479	2	1587.79	0.530623	0
cVYLQTSMk	1	B2R950	N-Term(TMT10); C1(Carbamidomethyl); K9(TMT10)	1.436e-05	48	0.00313016	2	1587.87	1.62065	0	1.14739	1		0.913231	1		1.1039	1		1.33117	1		1.31549	1		0.746244	1		0.86693	1		0.95718	1		0.530432	1
aAMEPIVISAk	11	Q9Y490	N-Term(TMT10); K11(TMT10)	1.774e-07	62.21	4.68615e-05	2	1587.96	1.01198	0	0.643809	11	16.566	1.00498	11	4.80066	1.07464	11	9.32052	1.0544	11	4.95033	0.868483	11	6.04247	1.14847	11	2.57956	0.922447	11	9.64373	1.03181	11	13.4697	1.36595	11	2.85794
lTGISDPVTVk	5	F5H810	N-Term(TMT10); K11(TMT10)	1.979e-06	51.41	0.000461127	2	1587.97	-0.550529	0	1.11093	5	2.41002	0.994896	5	0.623545	1.04397	5	3.93927	0.944998	5	2.55997	0.938987	5	7.68428	0.990057	5	4.28	1.1214	5	3.12206	1.0591	5	13.1774	0.928293	5	1.70829
vAFPLEVVQk	2	A8K6K4	N-Term(TMT10); K10(TMT10)	4.744e-06	37.08	0.0123015	2	1587.99	0.60178	0	1.16111	2	0.54159	0.893068	2	4.92053	0.970805	2	16.3131	1.07564	2	3.04116	0.862936	2	9.42167	0.946234	2	0.973661	1.12063	2	11.8326	1.03981	2	1.53178	1.01112	2	0.120236
hEDTLTLFPMR	4	P12259	N-Term(TMT10)	0.00158	41.17	0.00368169	3	1588.84	0.384846	0	1.03675	4	12.9899	1.08713	4	8.05181	1.0854	4	18.5074	1.0957	4	10.28	1.11504	3	14.7992	0.908753	4	33.9591	1.09735	4	41.0854	0.950292	4	20.3079	0.859591	4	18.4355
nTGIIcTIGPASR	4	P14618	N-Term(TMT10); C6(Carbamidomethyl)	6.129e-06	37.9	0.0102336	3	1588.87	0.298338	0	0.714868	4	9.43317	1.00824	4	11.0693	0.986492	4	8.44261	1.01933	4	4.83667	0.92727	4	9.81273	0.979363	4	7.95037	0.871817	4	3.06756	1.19358	4	5.35857	1.2803	4	1.65098
lGAEVYHTLk	1	A8K3B0	N-Term(TMT10); K10(TMT10)	0.003989	18.23	1.16569	3	1588.95	-0.314905	0	0.880795	1		0.971587	1		1.05445	1		1.02271	1		1.30486	1		1.00854	1		1.00518	1		0.840257	1		1.06832	1
kIEEIAAk	20	P01031	N-Term(TMT10); K1(TMT10); K8(TMT10)	0.0001943	50.48	0.000441863	2	1589.02	0.345181	1	1.23615	20	3.20281	0.983505	20	3.19455	1.11568	20	4.18392	0.961261	20	5.40671	0.819004	20	8.16391	0.920691	20	6.75786	1.22597	20	5.1817	0.901343	20	5.2105	1.03186	20	6.19162
aQAVSEDAGGNEGR	1	C9JZG1	N-Term(TMT10)	0.001096	21.53	0.378956	2	1589.77	1.61425	0	0.548608	1		0.944091	1		1.04401	1		1.03096	1		0.856628	1		1.5217	1		0.976535	1		0.810892	1		1.41821	1
mEIQEIQLk	12	H7BYY1;A0A024R5W6;J3KN67;A0A0S2Z4G4;A0A0S2Z4I4	N-Term(TMT10); K9(TMT10)	1.734e-05	50.64	0.000737415	2	1589.94	1.3166	0
aLANSLAcQGk	4	P04075	N-Term(TMT10); C8(Carbamidomethyl); K11(TMT10)	7.96e-09	77.31	1.52154e-06	2	1590.9	-0.373033	0	0.561624	4	13.6441	0.966315	4	2.24199	0.903288	4	5.94249	1.13183	4	1.89082	0.906608	4	3.76626	1.14344	4	4.71071	0.904831	4	7.83943	1.04094	4	6.78933	1.40364	4	8.52202
ekLTALTk	1	C0JYY2	N-Term(TMT10); K2(TMT10); K8(TMT10)	0.0003027	37.24	0.00579613	2	1591.04	2.86719	1	1.00168	1		0.990481	1		0.975099	1		1.24175	1		0.743721	1		1.03358	1		1.01974	1		0.919706	1		1.08425	1
vDVQAGAcEGk	99	P0C0L4;P0C0L5;A0A0G2JPR0	N-Term(TMT10); C8(Carbamidomethyl); K11(TMT10)	1.133e-07	68.25	9.62828e-06	2	1591.85	-0.531308	0
rPYFPVAVGk	17	P08603;A8K5T0;Q02985	N-Term(TMT10); K10(TMT10)	5.411e-05	26.63	0.185331	3	1591.97	0.0395937	0
tSTADYAMFk	31	A0A140VJJ6;D3DP16	N-Term(TMT10); K10(TMT10)	4.456e-06	52.53	0.000333127	2	1592.84	1.3982	0
sASNMAIVDVk	58	P01023	N-Term(TMT10); K11(TMT10)	2.226e-08	71.55	5.87167e-06	2	1592.91	0.144116	0	1.60438	58	10.4845	1.34843	58	10.5219	1.43619	58	8.04335	1.71505	58	8.34202	1.72441	58	9.67388	0.277699	58	71.0546	0.277537	58	67.542	0.264085	46	139.409	0.306518	36	82.2715
vTcTNAELVk	19	P01031	N-Term(TMT10); C3(Carbamidomethyl); K10(TMT10)	5.777e-08	66.52	1.96659e-05	2	1592.91	1.99336	0	1.27439	19	9.03895	0.991128	19	3.07121	1.10217	19	5.07336	0.974461	19	3.2544	0.919292	19	8.24261	0.924637	19	5.97903	1.20271	19	6.28621	0.915611	19	6.18537	0.840788	19	12.9631
rLENNHAQLLR	2	A8K2W3	N-Term(TMT10)	0.0006044	22.24	0.516137	4	1592.92	1.34191	1	0.806158	2	14.5127	0.95159	2	12.1893	1.06669	2	2.31494	1.04548	2	9.27168	1.00451	2	8.1244	1.16739	2	18.8658	0.972768	2	8.99874	0.994601	2	2.98002	1.04993	2	6.21224
vANYVDWINDR	6	Q04756	N-Term(TMT10)	2.306e-06	53.87	0.00109668	2	1593.82	1.60206	0	1.14743	6	4.82719	0.993361	6	3.76647	0.822338	6	5.92524	0.875951	6	5.10762	0.884314	6	0.775567	1.05275	6	0.711742	1.02975	6	6.72278	1.19753	6	3.19506	1.09171	6	1.41489
vVTFcGHTSk	2	P02747	N-Term(TMT10); C5(Carbamidomethyl); K10(TMT10)	9.144e-05	50.1	0.000719247	3	1593.88	-1.60891	0	1.18872	2	16.5052	1.39987	2	7.11132	1.17906	2	10.6205	1.09486	2	3.20847	0.628131	2	9.90117	0.984104	2	0.969995	1.02883	2	12.4481	0.838562	2	28.5062	0.638396	2	18.2037
eIMENYNIALR	102	P08603;A8K5T0;B1AKG0	N-Term(TMT10)	2.328e-08	75.12	2.50548e-06	2	1594.85	1.15666	0
vASYAAWIDSVLA	4	Q6FHW3	N-Term(TMT10)	0.0004616	46.65	0.00214758	2	1594.87	0.129347	0	1.21888	4	6.42948	1.01805	4	5.63822	1.08695	4	6.47447	1.04284	4	4.46336	0.980751	4	11.6948	0.958763	4	6.20643	1.01295	4	15.4912	0.958013	4	5.45552	0.739623	4	15.5573
gYSIFSYATk	1	P02741	N-Term(TMT10); K10(TMT10)	0.001381	19.9	1.15734	3	1594.89	3.57245	0	0.92271	1		1.00986	1		2.44529	1		0.621383	1		1.36398	1		0.656746	1		0.932725	1		0.976982	1		0.584915	1
qHLGDVLNFLPL	6	A0A1U9X8W4	N-Term(TMT10)	3.57e-05	57.37	0.000215663	2	1594.92	3.64215	0	1.12905	6	15.0776	1.00287	6	8.06076	0.950592	6	3.12658	0.963151	6	7.39059	1.0838	6	33.7976	1.00973	6	11.5634	1.11499	6	17.0989	1.1069	6	12.3432	0.797498	6	11.9531
hVLAAWALGAk	2	P09172	N-Term(TMT10); K11(TMT10)	5.369e-07	63.19	2.37708e-05	2	1594.99	5.07048	0	1.03269	2	1.66523	0.910769	2	1.87331	0.999615	2	1.31146	1.07689	2	0.171387	0.911506	2	5.36761	0.845498	2	1.26143	0.999776	2	1.95701	1.52276	2	3.57828	0.600811	2	7.27892
kYNELLk	16	P10909	N-Term(TMT10); K1(TMT10); K7(TMT10)	0.005979	14.76	1.32843	3	1595.01	0.584436	1	1.03201	16	7.99883	0.890174	16	8.66168	0.864438	16	4.86886	0.938161	16	6.23244	0.782679	16	5.79881	1.09815	16	8.73376	1.31492	16	8.3344	1.09755	16	5.71317	1.1273	16	8.53237
lEDSVTYHcSR	27	B4E1Z4	N-Term(TMT10); C9(Carbamidomethyl)	1.057e-06	61.66	1.55914e-05	3	1595.77	-0.70695	0	1.05495	27	6.01724	1.11894	27	8.7848	1.01199	27	4.31795	0.951794	27	5.01851	0.990763	27	10.0025	1.03828	27	10.4519	1.13625	27	9.43909	0.626053	27	30.382	1.2457	27	12.1279
iAVAAQNcYk	5	V9HWK1	N-Term(TMT10); C8(Carbamidomethyl); K10(TMT10)	1.365e-05	49.51	0.000905625	2	1595.9	0.451118	0	0.56585	5	39.6485	1.01754	5	13.0219	0.92261	5	5.63739	1.06882	5	2.93438	0.894554	5	3.95606	1.15116	5	5.23788	0.961975	5	14.8497	1.12606	5	3.14167	1.23673	5	12.5303
gSPAINVAVHVFR	1	A6XMH1	N-Term(TMT10)	7.338e-07	29.74	0.0856257	3	1595.92	1.47705	0	1.18484	1		0.987279	1		1.01062	1		1.13742	1		0.80754	1		1.04918	1		1.0616	1		0.950769	1		0.838554	1
qGFFPDSVNk	24	C0JYY2;Q7Z7Q0	N-Term(TMT10); K10(TMT10)	0.0001936	51.65	0.000623385	2	1596.89	4.8437	0
eVYGFNPEGk	25	C0JYY2;Q7Z7Q0	N-Term(TMT10); K10(TMT10)	4.156e-05	48.79	0.00286985	2	1597.86	0.48541	0
dYQELMNVk	6	P35908	N-Term(TMT10); K9(TMT10)	8.785e-06	44.27	0.00809201	2	1597.87	-0.172133	0	0.913734	6	4.13578	0.975983	6	8.25922	1.04958	6	6.77136	0.780738	6	6.12453	0.867119	6	22.0848	0.940314	6	3.6378	1.31045	6	8.8892	1.52403	6	8.23102	0.869626	6	7.1131
gSESGIFTNTk	31	P02671	N-Term(TMT10); K11(TMT10)	1.25e-09	75.96	1.72135e-06	2	1598.88	-0.521536	0	1.25718	31	7.44362	0.999502	31	5.00609	1.36314	31	6.94116	0.97772	31	4.88038	1.21674	31	6.20571	0.741865	31	8.85418	1.12208	31	5.04615	0.811438	31	6.12899	0.730728	31	10.7483
eNLcLNLHk	18	C0JYY2;Q59HB3;E1B4S9	N-Term(TMT10); C4(Carbamidomethyl); K9(TMT10)	3.062e-06	55.09	0.000242373	2	1598.91	1.49676	0
tIAVLLDDILQR	5	C9J0J0	N-Term(TMT10)	7.232e-07	46.01	0.00122925	2	1598.98	5.42022	0	1.16098	5	11.4102	1.0062	5	1.22291	0.994927	5	12.2672	0.972575	5	3.66516	1.05097	5	29.3124	0.970344	5	4.44781	1.10485	5	9.15515	1.0663	5	26.9994	1.04423	5	5.93853
eAQLPVIENk	39	P00747	N-Term(TMT10); K10(TMT10)	1.533e-06	55.07	0.00021642	2	1598.95	0.989047	0	1.10094	39	5.21833	0.950515	39	5.34401	0.96857	39	9.73993	1.00312	39	5.15825	0.830106	39	6.33332	1.04355	39	5.1845	1.09108	38	7.77679	1.05587	39	5.38399	1.06623	38	7.36477
nTFTLScDGSLR	40	C0JYY2	N-Term(TMT10); C7(Carbamidomethyl)	4.302e-08	61.74	2.17378e-05	2	1599.8	0.671095	0	1.11848	40	7.73825	0.932969	40	7.92815	0.946731	40	10.3198	1.10227	40	6.10791	0.940179	40	10.4127	1.06078	40	5.96078	1.05868	40	5.15419	0.981196	40	7.2485	0.91264	40	12.2532
eLSDFISYLQR	3	B3KQT9	N-Term(TMT10)	1.476e-06	44.72	0.00215864	2	1599.86	0.105382	0	0.620995	3	15.1179	0.995019	3	5.71483	0.907643	3	11.2048	1.13431	3	2.82348	0.931687	3	4.97957	1.19402	3	0.024701	0.939954	3	0.585617	1.01865	3	4.87771	1.30497	3	1.61851
sLEcLHPGTk	15	G3XAM2;Q6LAM1	N-Term(TMT10); C4(Carbamidomethyl); K10(TMT10)	2.192e-05	49.31	0.00101747	2	1599.89	0.115448	0
tIYTPGSTVLYR	1	P01024	N-Term(TMT10)	0.000293	31.91	0.0547866	2	1599.9	3.84836	0	1.0951	1		1.07093	1		1.0634	1		1.03396	1		1.01128	1		0.894144	1		0.968776	1		1.03859	1		0.888815	1
gGYTLVSGYPk	64	P02790	N-Term(TMT10); K11(TMT10)	2.256e-07	79.65	1.12024e-06	2	1599.92	0.854997	0	1.11511	64	6.86186	1.00812	64	5.0055	1.03491	64	8.12992	0.990331	64	5.02104	0.904689	64	8.27013	0.971253	64	6.21379	1.11587	64	6.72183	1.00016	64	6.67786	0.993417	64	8.52786
sLGFcDTTNk	24	P02745	N-Term(TMT10); C5(Carbamidomethyl); K10(TMT10)	9.761e-07	54.76	0.000145876	2	1600.84	1.10783	0	1.22279	24	5.92732	1.38843	24	6.05898	1.14931	24	4.61507	1.112	24	4.99201	0.626965	24	15.4914	0.897365	24	6.23616	0.79868	24	9.39624	1.10461	24	6.15674	0.521796	24	12.6947
imQSSQSMSk	5	O75882;B4DZ36	N-Term(TMT10); M2(Oxidation); K10(TMT10)	0.003144	34.75	0.0155926	2	1600.85	1.28342	0
gAYPLSIEPIGVR	52	P00450	N-Term(TMT10)	2.011e-08	59.72	7.67949e-05	2	1600.93	0.533554	0	1.07226	52	8.85862	0.954245	52	10.4486	1.04125	52	7.08773	0.975131	52	8.23972	0.933341	52	11.2476	1.00375	52	6.57566	1.07723	52	11.1361	1.00706	52	9.49737	0.989897	52	18.4294
qGHNSVFLIk	18	P02790	N-Term(TMT10); K10(TMT10)	1.717e-06	64.8	2.75998e-05	2	1600.96	0.528635	0	1.18223	18	5.83394	1.09292	18	8.93671	1.00633	18	7.0691	0.974947	18	6.56867	0.945899	18	10.109	0.966403	18	8.76621	1.14963	18	9.18787	0.820986	18	18.387	1.00891	18	7.87183
hQFLLTGDTQGR	45	P04217	N-Term(TMT10)	2.506e-06	63.15	2.98734e-05	2	1601.86	2.29584	0	1.04889	45	15.5384	0.950444	45	7.66012	0.935659	44	12.3917	0.952288	45	8.65102	0.937045	45	11.2052	0.991285	45	7.77358	1.1426	45	11.2351	0.962175	45	10.1591	1.13503	45	13.2332
iGAEVYHNLk	6	P06733	N-Term(TMT10); K10(TMT10)	5.624e-06	36.7	0.0157675	2	1601.94	0.83236	0	0.831798	6	12.5921	1.06429	6	4.72179	0.973511	6	0.821023	1.1796	6	7.17202	0.977735	6	2.72724	1.08218	6	4.6879	0.940875	6	4.85604	0.847799	6	10.4166	1.20976	6	10.8915
sDVMYTDWk	7	P19652	N-Term(TMT10); K9(TMT10)	8.892e-05	40.84	0.00899547	2	1602.83	0.795808	0	0.65041	7	28.121	0.578746	7	22.7888	0.581918	7	18.7054	1.12283	7	5.38357	4.61757	7	25.1786	0.38053	7	35.5891	0.666024	7	28.3711	0.314942	7	39.0158	0.36146	7	54.6719
cTWLIEGQPNR	2	O75882;B4DZ36	N-Term(TMT10); C1(Carbamidomethyl)	0.0002135	30.32	0.102604	2	1602.83	0.799092	0
gPDVLTATVSGk	48	B2RMS9;B7ZKJ8;B7Z8Q7;B7Z544	N-Term(TMT10); K12(TMT10)	1.236e-07	81.4	6.20842e-07	2	1602.95	-0.261168	0
cEEDEEFTcR	18	P00747	N-Term(TMT10); C1(Carbamidomethyl); C9(Carbamidomethyl)	0.0001137	46.45	4.18959e-05	3	1603.66	0.265836	0	0.952535	18	11.9549	1.10016	18	13.8932	0.871124	18	9.90002	0.983066	18	11.9425	0.896413	18	6.23616	1.05535	18	8.59632	1.07733	18	10.555	1.03024	18	9.79647	1.11357	18	8.67778
eVANSTANLVk	12	Q9Y4G6;Q9Y490	N-Term(TMT10); K11(TMT10)	8.231e-09	74.66	2.58365e-06	2	1603.94	1.7934	0
hYEGSTVPEk	57	P00738	N-Term(TMT10); K10(TMT10)	5.509e-06	51.07	0.000505713	2	1604.87	2.87822	0	0.655367	56	19.5276	1.38959	57	9.46538	2.83725	57	17.0583	0.858302	57	5.78204	2.55571	57	16.1651	0.283566	53	96.2647	0.369781	56	47.7967	0.276624	49	97.9261	0.338305	53	82.3147
icAMEGLPQk	18	P43652	N-Term(TMT10); C2(Carbamidomethyl); K10(TMT10)	7.199e-06	53.94	0.000715461	2	1604.89	0.786303	0	1.11887	18	4.15776	0.834304	18	5.03806	0.960218	18	11.2367	0.823077	18	6.86048	0.782318	18	5.15454	0.968293	18	10.1147	1.14494	18	7.00636	1.30475	18	8.22793	1.05049	18	10.9542
cQSWSSMTPHR	4	P00747	N-Term(TMT10); C1(Carbamidomethyl)	2.127e-05	48.7	0.000135571	2	1605.75	0.752853	0	1.11037	4	4.62444	0.974336	4	10.0272	1.00014	4	4.82255	1.06722	4	4.55887	0.974551	4	3.94251	0.974835	4	16.845	1.21836	4	5.34476	0.859097	4	8.8751	1.0846	4	15.7119
vFIGINDLEk	3	Q9BWP8	N-Term(TMT10); K10(TMT10)	3.06e-06	51.97	0.000437108	2	1605.96	0.786397	0	0.90596	3	3.02402	1.01059	3	2.76009	1.08967	3	4.66719	0.914292	3	5.45577	0.88315	3	1.47011	1.14507	3	5.57189	1.00575	3	4.7366	1.12083	3	11.0143	1.14822	3	1.0872
sTMkPVQk	2	P11021	N-Term(TMT10); K4(TMT10); K8(TMT10)	0.006098	27	0.111136	2	1606	0.0450375	0	0.773745	2	22.102	0.896288	2	2.58947	0.94503	2	1.93836	1.04356	2	7.51447	0.787738	2	9.31742	1.14972	2	6.73461	1.05277	2	2.78298	1.17564	2	7.58742	1.22594	2	11.2835
vEHSDLSFSk	12	H0YLF3	N-Term(TMT10); K10(TMT10)	1.093e-06	53.06	0.000405829	2	1606.89	1.18156	0	1.27165	12	6.47641	1.32564	12	7.87843	1.18787	12	8.86645	0.836095	12	3.42168	0.901493	12	11.4201	0.819263	12	11.1353	1.199	12	4.66754	0.60775	12	13.1197	1.10346	12	4.26169
gTTVTVSSAPTk	5	Q8NF20	N-Term(TMT10); K12(TMT10)	4.286e-07	54.57	0.000287517	2	1606.95	3.29302	0	0.647248	5	3.95099	0.917791	5	8.6574	0.798182	5	15.5978	0.632085	5	38.93	4.89364	5	9.22433	0.277512	5	10.9594	0.622118	5	11.1205	0.352165	5	38.8131	0.346371	5	66.0558
rPGVYTQVTk	9	Q14520	N-Term(TMT10); K10(TMT10)	5.713e-05	28.92	0.104382	3	1606.97	-0.545765	0	1.18815	9	12.2342	0.936229	9	6.76642	1.06542	9	8.32515	1.01661	9	7.76147	0.852134	9	11.6745	0.918731	9	9.1989	0.975789	9	5.38751	1.0455	9	6.1975	1.10814	9	2.34684
hQQTVTIPPk	6	P01024	N-Term(TMT10); K10(TMT10)	0.0003284	41.42	0.00560301	2	1606.97	1.01985	0	1.04837	6	6.21526	1.10834	6	5.52152	1.12988	6	4.81866	1.0474	6	6.35073	0.973372	6	3.86075	0.888515	6	7.50672	0.993244	6	9.90554	0.937419	6	10.2435	0.932736	6	9.21177
kVTSEDLk	3	A8K6K4	N-Term(TMT10); K1(TMT10); K8(TMT10)	0.0006783	33.06	0.0322785	3	1607	1.5179	1	1.05029	3	0.926671	0.909776	3	8.52453	0.992021	3	2.58714	1.09591	3	1.38003	0.947642	3	0.110891	1.03517	3	0.232048	1.10566	3	2.93005	0.916174	3	1.79021	1.06982	3	8.01882
mELQEMQLk	34	V9HW25;P67936;K7ENT6	N-Term(TMT10); K9(TMT10)	1.566e-06	57.33	0.000164677	2	1607.89	-0.37399	0
lLcTDPGFVk	1	A0A0U2N547	N-Term(TMT10); C3(Carbamidomethyl); K10(TMT10)	0.0001271	42.1	0.00502217	2	1607.92	0.736791	0	1.07943	1		0.909278	1		0.934974	1		1.04857	1		1.03583	1		0.962792	1		0.963821	1		1.06437	1		1.07096	1
lPVVPHAEck	3	Q6MZL2	N-Term(TMT10); C9(Carbamidomethyl); K10(TMT10)	0.0001896	48.75	0.00104815	2	1607.93	-0.553519	0	1.24772	3	9.00746	1.01847	3	2.48671	0.903497	3	1.41379	0.88263	3	10.3937	1.11074	3	7.03524	0.905664	3	26.725	1.21124	3	3.55887	1.04831	3	1.1166	0.922493	3	21.4396
lVNEVTEFAk	18	P02768;F6KPG5	N-Term(TMT10); K10(TMT10)	1.174e-07	65.54	2.00365e-05	2	1607.94	0.170658	0
vLNYVDWIk	4	Q53HT9	N-Term(TMT10); K9(TMT10)	1.753e-05	51.69	0.000485191	2	1607.96	1.62475	0	1.17736	4	5.41216	0.989921	4	3.68797	1.03457	4	5.91488	0.942142	4	3.15528	0.812522	4	5.66968	0.977388	4	4.29378	1.3504	4	6.34364	1.13417	4	1.53867	0.669295	4	2.64559
vVAGVANALAHk	10	P68871;P02042;Q6VFQ6	N-Term(TMT10); K12(TMT10)	8.293e-09	77.48	9.19148e-07	2	1608	1.44744	0
nEEALDTESSER	3	Q92859	N-Term(TMT10)	0.000571	26.52	0.0353207	3	1608.76	2.38817	0	0.954755	3	7.4742	1.04931	3	40.0191	0.918207	3	4.02315	1.029	3	12.6106	1.2797	3	8.79858	0.934475	3	4.3526	1.13163	3	22.6713	0.997714	3	2.10925	1.0008	3	9.54881
tSTADYAmFk	16	A0A140VJJ6;D3DP16	N-Term(TMT10); M8(Oxidation); K10(TMT10)	0.0002144	46.75	0.00100708	2	1608.83	-0.235156	0
cEIAGWGETk	5	P26927	N-Term(TMT10); C1(Carbamidomethyl); K10(TMT10)	1.389e-06	50.72	0.000490968	2	1608.85	0.891444	0	1.01422	5	6.48397	1.02799	5	2.56885	1.00609	5	12.0144	0.958244	5	4.09448	0.957318	5	9.81925	0.961202	5	3.04714	1.1206	5	6.87394	1.02493	5	2.13769	1.04289	5	9.55844
sASNmAIVDVk	14	P01023	N-Term(TMT10); M5(Oxidation); K11(TMT10)	3.342e-05	65.97	1.84386e-05	2	1608.91	2.39276	0	1.42946	14	13.6057	1.27824	14	7.79423	1.36424	14	9.916	1.54615	14	10.2237	1.72511	14	7.44202	0.394653	14	43.5872	0.433955	14	38.9178	0.310904	13	57.7913	0.40675	13	37.4674
kATVVYQGER	20	D9IWP9	N-Term(TMT10); K1(TMT10)	4.067e-05	39.61	0.00706696	3	1608.95	0.99659	1	1.07432	20	11.2806	1.0712	20	7.59056	0.939377	20	5.46552	0.949126	20	5.27164	0.811119	20	15.856	1.00254	20	6.23824	1.16584	20	4.59311	0.935493	20	3.26242	1.21322	20	8.07308
gTLVTVSSASTk	5	S6BGF5;S6BGE0	N-Term(TMT10); K12(TMT10)	1.971e-09	79.9	6.11929e-07	2	1608.96	0.466209	0
gAQTQTEEEMTR	1	Q9BZQ0	N-Term(TMT10)	1.635e-05	43.01	0.000975067	2	1609.77	0.521621	0	0.764681	1		1.17045	1		0.82671	1		0.956996	1		1.19743	1		0.875098	1		1.29684	1		1.07339	1		0.955866	1
aLQATVGNSYk	3	B3KRY3	N-Term(TMT10); K11(TMT10)	3.269e-08	60.69	6.29161e-05	2	1609.94	2.82333	0	1.19433	3	0.83309	0.903969	3	8.31385	0.960696	3	15.0074	1.10157	3	3.20927	1.07963	3	10.6178	0.954791	3	10.3217	0.896049	3	6.52217	1.01741	3	0.761861	0.955967	3	6.86627
aHLLSLVDVMQR	2	P04275;L8E853	N-Term(TMT10)	1.166e-06	68.8	8.91801e-06	3	1610.93	1.05382	0
qPSSAFAAFVk	1	P01024	N-Term(TMT10); K11(TMT10)	7.761e-06	41.14	0.00514548	3	1610.93	-0.762161	0	1.09001	1		1.00468	1		1.21028	1		0.918905	1		1.06905	1		0.892962	1		1.06499	1		0.975669	1		0.977995	1
fEGIAcEISk	30	A0A024R035	N-Term(TMT10); C6(Carbamidomethyl); K10(TMT10)	2.855e-07	65.2	1.96901e-05	2	1611.88	0.713947	0	1.13987	30	6.6266	0.893233	30	6.84544	1.15137	30	7.33219	0.888874	30	5.90945	1.00006	30	6.70888	0.90129	30	5.90839	1.15777	30	5.70388	0.958037	30	6.06162	1.16063	30	6.14148
dLDMFINASk	8	O75882;B4DZ36	N-Term(TMT10); K10(TMT10)	1.511e-06	65.82	1.67826e-05	2	1611.88	-0.50148	0
fEDENFILk	7	A8K486	N-Term(TMT10); K9(TMT10)	2.101e-05	47.37	0.00193859	2	1612.91	4.08315	0	0.552675	7	4.00102	1.02479	7	4.82217	0.932131	7	5.39749	1.11082	7	0.583371	0.857261	7	1.93762	1.23604	7	3.59706	0.969478	7	7.18161	1.07775	7	4.01445	1.26891	7	7.48487
lcENIAGHLk	4	P04040	N-Term(TMT10); C2(Carbamidomethyl); K10(TMT10)	2.161e-05	43.3	0.00711659	3	1612.93	1.49156	0	0.975784	4	8.0411	0.934021	4	5.8021	1.1211	4	4.66302	1.01791	4	3.0713	0.980469	4	5.5397	0.932471	4	6.57363	0.989061	4	8.36821	1.0263	4	7.43295	1.07396	4	10.4219
tGESVEFVck	46	P08603;A8K5T0	N-Term(TMT10); C9(Carbamidomethyl); K10(TMT10)	1.951e-06	52.88	0.000256069	2	1613.86	0.554388	0
vcSSPPIHMk	1	P23470	N-Term(TMT10); C2(Carbamidomethyl); K10(TMT10)	0.003938	28.3	0.151609	3	1613.89	1.3695	0	0.987766	1		1.05266	1		0.888269	1		1.04641	1		0.940384	1		1.0948	1		1.29094	1		0.83433	1		1.00079	1
sSGLVSNAPGVQIR	4	P04180	N-Term(TMT10)	1.93e-07	49.62	0.00112582	2	1613.92	-0.541456	0	0.954268	4	9.08116	0.884527	4	10.1841	0.928955	4	12.642	1.04116	4	1.52811	1.57407	4	6.28141	0.853321	4	10.5783	0.858843	4	6.06605	0.874374	4	8.97071	0.88388	4	9.38531
iVGPSGAAVPck	2	P21333	N-Term(TMT10); C11(Carbamidomethyl); K12(TMT10)	8.326e-06	48.8	0.000826547	2	1613.95	0.834824	0	0.522357	2	30.5632	1.06385	2	6.94305	1.47072	2	10.8616	0.905416	2	4.4181	0.703013	2	10.2788	1.22291	2	5.5658	0.82739	2	1.86194	0.772967	2	23.4771	1.82135	2	15.3389
lPxATPTELAk	114	A0A1B1CYC9	N-Term(TMT10); X3(D); K11(TMT10)	0.0001105	68.04	8.99818e-06	2	1613.95	0.80615	0	1.412	57	5.47993	1.33051	57	8.96122	0.946592	57	7.46635	0.947039	57	3.91162	0.440207	57	48.5501	0.75236	57	9.49041	1.0331	57	5.38145	1.0381	57	4.40547	1.22756	57	10.0316
eELLPAQDIk	62	B4E1Z4;H7C5H1	N-Term(TMT10); K10(TMT10)	2.908e-06	53.87	0.000235047	2	1613.95	0.730516	0
gGSIQQYIYk	2	A0A0U1RR20	N-Term(TMT10); K10(TMT10)	2.695e-05	42.12	0.00494385	3	1614.93	0.784989	0	1.01458	2	3.57278	1.07455	2	0.586119	1.07614	2	8.13826	0.951868	2	2.69949	0.802871	2	5.68963	0.896174	2	10.3201	1.06929	2	3.35194	1.00941	2	0.984465	1.29192	2	8.82762
yGLDSDLSck	30	P36955	N-Term(TMT10); C9(Carbamidomethyl); K10(TMT10)	2.236e-06	50.66	0.000380972	2	1615.84	0.628046	0	1.23699	30	6.00435	1.00654	30	5.37126	1.10483	30	4.96303	0.88748	30	4.68121	0.832939	30	9.46574	0.958629	30	5.97467	1.09273	30	5.42571	1.03633	30	3.93232	1.02477	30	7.72617
yGFIEGHVVIPR	8	A0A1Z1VXF2	N-Term(TMT10)	1.299e-05	61.16	5.38214e-05	3	1615.92	0.209508	0	1.12656	8	15.5554	0.925126	8	8.32533	0.923287	8	3.17701	0.970701	8	3.26383	1.10574	8	9.78692	0.994236	8	10.0531	1.13044	8	17.8077	1.06583	8	9.30083	0.951432	8	12.9832
tGEAIVDAALSALR	2	Q15084	N-Term(TMT10)	1.199e-06	47.24	0.00138201	3	1615.92	0.29768	0	0.791303	2	50.7922	1.00276	2	10.4449	0.986511	2	8.08627	1.1077	2	5.01769	0.82533	2	4.86049	1.08515	2	18.972	0.987861	2	2.00707	1.03408	2	14.4045	1.14794	2	27.8615
eIIIHQNYk	15	P03952	N-Term(TMT10); K9(TMT10)	3.994e-05	41.96	0.00451488	2	1615.96	1.72234	0	1.14681	15	5.99473	1.01268	15	3.08758	0.959302	15	6.46758	1.12027	15	4.48948	0.971295	15	3.48744	0.946515	15	6.79488	0.892023	15	9.49806	0.967343	15	5.33935	0.980045	15	13.9829
qWLEIDLLk	4	P12259	N-Term(TMT10); K9(TMT10)	6.511e-05	43.34	0.00295679	2	1615.98	0.492948	0	1.09616	4	4.9812	0.920916	4	2.42103	0.993191	4	4.29031	0.885002	4	4.51764	0.84895	4	7.62095	1.00142	4	3.72852	1.45565	4	3.01331	1.044	4	3.4432	0.9762	4	1.04449
lQATVQELQk	3	P31146	N-Term(TMT10); K10(TMT10)	1.142e-05	41.3	0.00482593	2	1615.98	-1.31896	0	0.914506	3	18.4491	0.935402	3	13.1248	0.938491	3	0.480514	1.02645	3	5.88404	0.98641	3	2.33202	1.11628	3	4.73146	1.0889	3	14.5251	1.02782	3	2.51941	1.1221	3	10.336
sFPTYcQQk	19	G3XAM2;Q6LAM1	N-Term(TMT10); C6(Carbamidomethyl); K9(TMT10)	4.288e-05	53.85	0.000194304	2	1616.85	-0.122358	0
dINTFIHGNk	4	P03950	N-Term(TMT10); K10(TMT10)	0.0009141	36.02	0.0296416	3	1616.91	-2.48796	0	1.09823	4	6.61655	0.855274	4	1.98649	1.09212	4	0.537406	0.953056	4	5.19416	0.810956	4	3.85985	1.11927	4	2.15445	1.1757	4	4.25117	1.07042	4	2.03747	1.0584	4	3.57321
kYFIDFVAR	10	B4E1C2;B4DPP8	N-Term(TMT10); K1(TMT10)	0.0008469	28.81	0.180646	2	1616.96	0.424018	1
dTMVEDLVVLVR	31	B7Z550	N-Term(TMT10)	6.928e-07	69.16	9.20355e-06	3	1617.91	1.11076	0	1.10034	31	5.37365	0.979731	31	7.83713	0.971301	31	7.86233	0.979394	31	5.95958	0.823563	31	10.6512	0.882552	30	5.43453	1.15498	31	5.60298	1.17533	31	6.58811	1.05125	31	10.093
sSEDPNEDIVER	11	P01591	N-Term(TMT10)	1.588e-06	60.76	1.91397e-05	2	1618.78	1.03172	0	1.156	11	24.7287	1.37025	11	8.29446	1.3557	11	38.1876	1.36055	11	14.6082	1.49692	11	19.9763	0.441599	11	74.781	0.550437	11	58.1177	0.390602	10	71.4176	0.428673	10	99.3762
lPLEYSYGEYR	10	B7Z550	N-Term(TMT10)	1.002e-06	36.37	0.00937693	2	1618.83	0.380242	0	1.09908	10	2.93446	0.955418	10	14.7535	0.981681	10	7.65875	0.986518	10	4.29019	1.01859	10	24.311	0.849145	10	10.7895	0.983427	10	9.98485	1.10147	10	12.0553	1.03701	10	22.3391
eVPLNTIIFMGR	10	P01008	N-Term(TMT10)	3.05e-06	55.43	0.000259924	2	1618.92	1.19256	0	1.03724	10	7.49317	0.997097	10	7.05233	0.987991	10	8.9501	1.03071	10	4.67656	0.859821	10	10.9408	1.0024	10	14.208	1.20036	10	13.9365	1.03332	10	7.58375	0.858929	10	10.082
eVAFDLEIPk	41	P19827;B7Z539	N-Term(TMT10); K10(TMT10)	3.721e-05	61.58	6.15792e-05	2	1618.95	0.773165	0
qTLSWTVTPk	3	B2R950;B7Z7M2	N-Term(TMT10); K10(TMT10)	9.013e-07	56.03	0.000205056	2	1618.96	2.74621	0
eITALAPSTMk	20	P60709;P63261;A8K3K1;Q13707	N-Term(TMT10); K11(TMT10)	2.437e-06	50.31	0.000852895	2	1619.94	-0.033232	0
nQVSLTcLVk	15	Q6MZU6;V9HW68;Q6MZQ6;Q6N094;Q6GMX6;Q6N089;Q6N095;P0DOX5;Q5EBM2;P01861	N-Term(TMT10); C7(Carbamidomethyl); K10(TMT10)	2.03e-07	63.21	4.18554e-05	2	1619.95	-0.701253	0
kTDPSGLSk	1	B3KNN9	N-Term(TMT10); K1(TMT10); K9(TMT10)	0.0003852	21.38	0.544015	3	1619.99	0.444167	1	1.08144	1		0.947992	1		0.958999	1		0.955212	1		0.923686	1		1.02889	1		1.14768	1		1.06697	1		1.02251	1
icAmEGLPQk	9	P43652	N-Term(TMT10); C2(Carbamidomethyl); M4(Oxidation); K10(TMT10)	0.0003963	34.97	0.0247094	3	1620.89	5.11237	0	1.05412	9	10.2518	0.928116	9	4.91866	1.46713	9	27.8296	0.856687	9	7.01242	1.39902	9	43.1551	0.858606	9	21.2038	0.869537	9	19.2784	0.906589	9	30.7756	0.960239	9	15.2746
eVSFDVELPk	19	Q06033	N-Term(TMT10); K10(TMT10)	2.529e-06	53.51	0.000399531	2	1620.93	0.388302	0	1.06884	19	4.65212	0.94507	19	7.46207	1.19005	19	5.68273	0.888955	19	5.08744	0.942835	19	13.2324	0.96104	19	4.28608	1.17928	19	7.02017	1.01278	19	4.47068	1.05064	19	4.42087
aDAEGESDLENSR	4	Q9Y490	N-Term(TMT10)	2.503e-06	57.63	1.49285e-05	2	1621.75	1.46129	0	0.48518	4	40.0277	1.10869	4	0.81704	1.00534	4	6.07915	1.04428	4	8.06691	0.788946	4	7.23828	1.20456	4	13.371	0.979929	4	10.5687	1.07575	4	3.83066	1.31073	4	19.9366
tFTAWcNSHLR	1	O43707;P12814	N-Term(TMT10); C6(Carbamidomethyl)	0.0002145	36.57	0.00768821	2	1621.81	-1.04805	0
kLcMAALk	13	P02774;D6RF20	N-Term(TMT10); K1(TMT10); C3(Carbamidomethyl); K8(TMT10)	0.0002238	49.86	0.000584543	2	1622.01	0.568817	1
aSSIIDELFQDR	30	P10909	N-Term(TMT10)	3.344e-06	66.52	1.50531e-05	3	1622.86	1.81481	0	0.966335	30	9.98537	0.904072	30	8.63437	0.852487	29	10.6097	0.963007	29	8.50247	0.845973	29	12.3001	1.13258	30	9.20731	1.28752	29	10.2025	1.13253	29	8.37997	1.10724	30	8.97582
aTAVMPDGQFk	1	A0A0A0MSI0	N-Term(TMT10); K11(TMT10)	4.516e-06	59.5	9.75034e-05	2	1622.9	0.330063	0	0.738184	1		1.05163	1		1.34172	1		0.944455	1		0.881883	1		1.08174	1		0.891565	1		1.00434	1		1.25672	1
tFGETHPFTk	1	B4DVZ8	N-Term(TMT10); K10(TMT10)	0.002382	24.24	0.326602	3	1622.9	2.71766	0	0.91546	1		0.988284	1		0.98745	1		1.0356	1		1.05562	1		0.994284	1		1.13853	1		0.943263	1		1.07863	1
aATGEcTATVGk	218	B4E1C2;B4DPP8	N-Term(TMT10); C6(Carbamidomethyl); K12(TMT10)	3.736e-10	89.79	7.55146e-08	2	1623.88	1.30492	0
fVFGTTPEDILR	2	P07996;A0A024R9Q1	N-Term(TMT10)	0.00026	44.11	0.00292471	2	1623.89	0.158643	0
tSNFNAAISLk	8	A0A024R035	N-Term(TMT10); K11(TMT10)	1.44e-07	59.32	0.00025115	2	1623.95	3.45393	0	1.14398	8	3.48301	1.00028	8	5.67774	1.21158	8	6.3065	0.865472	8	3.11985	0.893785	8	4.28484	0.853369	8	2.7646	1.14458	8	1.72173	1.0874	8	6.84094	0.972008	8	7.24831
tLSDVLQYVk	2	Q6MZL2	N-Term(TMT10); K10(TMT10)	2.639e-06	40.45	0.00526518	2	1623.97	-0.375674	0	1.08563	2	13.1921	0.977045	2	3.04353	0.903267	2	0.625491	0.913839	2	3.48327	0.765189	2	0.12921	0.907747	2	7.32102	1.2855	2	6.87901	1.30767	2	3.85344	0.953513	2	8.80039
qGYFVEAQPk	37	P02743	N-Term(TMT10); K10(TMT10)	7.15e-06	52.87	0.000332056	2	1624.91	1.12958	0	1.12054	37	6.96032	1.01048	37	6.39007	1.15564	37	5.49557	0.987591	37	3.58114	0.858683	37	8.1524	0.885292	37	5.10523	1.03833	37	4.02615	0.951546	37	5.09307	1.14392	37	7.5871
hQTVPQNTGGk	15	Q53H26;B4E1B2	N-Term(TMT10); K11(TMT10)	3.434e-05	47.68	0.0011226	2	1624.92	-1.2041	0
tGDIVEFVck	11	V9GYE7	N-Term(TMT10); C9(Carbamidomethyl); K10(TMT10)	2.21e-06	50.14	0.000644389	2	1625.89	-1.48487	0	1.27235	11	4.08074	1.02658	11	3.86692	1.03188	11	8.3863	0.819367	11	5.79084	0.95382	11	3.33471	1.0716	11	4.19901	0.980516	11	3.7124	1.13551	11	4.70599	0.835196	11	3.04073
lPEATPTELAk	112	A0A1B1CYC9	N-Term(TMT10); K11(TMT10)	9.324e-06	61.82	4.09063e-05	2	1627.97	-0.940763	0	0.976526	56	10.0068	0.383191	35	73.3424	1.04194	56	5.24171	1.07277	56	5.17356	0.938591	56	7.02168	1.47767	56	15.7554	0.96861	56	7.66373	1.52172	56	10.5231	0.773547	56	8.88003
akLPDATPk	13	P02774	N-Term(TMT10); K2(TMT10); K9(TMT10)	0.003611	14.86	0.780545	3	1628.04	0.869047	1	0.781607	13	18.8222	1.75738	13	10.7313	0.831191	13	11.7521	1.14699	13	5.6486	0.970383	13	9.19907	0.430712	13	22.4287	1.14408	13	7.21897	0.161785	10	92.1368	1.97553	13	9.52464
lSMDIDVSYk	7	P01031	N-Term(TMT10); K10(TMT10)	0.0002207	42.63	0.0037248	3	1628.9	-0.417386	0	1.10475	7	6.03775	1.01192	7	3.69453	1.14015	7	5.36406	0.95914	7	2.76208	0.932588	7	11.264	1.01214	7	5.22377	1.33049	7	6.52055	0.881345	7	5.67895	0.824965	7	3.06723
tHLPEVFLSk	51	P02774	N-Term(TMT10); K10(TMT10)	0.0003075	55.6	0.000162362	2	1628.98	-0.110934	0	1.1553	51	7.60557	0.966361	51	6.41905	0.993507	51	11.2247	1.01658	51	4.76917	0.878077	51	7.84746	0.95803	51	7.84247	1.13219	51	6.14054	0.96274	51	6.07585	0.998389	51	11.8009
hQGVMVGMGQk	17	P60709;P63261;A8K3K1;Q13707;Q562R1	N-Term(TMT10); K11(TMT10)	3.991e-06	60.3	6.14548e-05	2	1629.9	-0.134478	0
sTLNEIYFGk	3	B2R7T8	N-Term(TMT10); K10(TMT10)	1.306e-06	57.34	0.000128874	2	1629.93	2.36786	0	0.637284	3	5.89384	1.04331	3	2.96944	1.11599	3	2.35835	1.0108	3	1.13518	1.03385	3	6.43921	1.09127	3	3.4203	0.935091	3	2.45132	0.894455	3	1.98769	1.41878	3	0.793528
aAAITSDILEALGR	3	C0IMJ3	N-Term(TMT10)	5.852e-10	77.15	1.36276e-06	2	1629.94	1.0744	0	1.21041	3	12.6488	1.05102	3	7.44911	0.954	3	21.4866	0.95595	3	0.829737	0.952064	3	12.9213	0.856877	3	7.23891	1.22069	3	5.94738	0.981654	3	11.0672	0.832312	3	0.305294
tGLLLLSDPDk	13	B2RMS9;B7ZKJ8;B7Z544	N-Term(TMT10); K11(TMT10)	1.88e-05	53.86	0.000286983	2	1629.98	-0.505593	0
lLPLVSDEVFIR	1	B4DSD8	N-Term(TMT10)	5.721e-07	37.36	0.012718	2	1629.98	-0.345311	0	0.879354	1		1.1131	1		1.08137	1		1.04725	1		0.863035	1		1.03147	1		1.05832	1		0.99518	1		1.01988	1
vNkPPYPk	2	P13796;B4DPW9	N-Term(TMT10); K3(TMT10); K8(TMT10)	0.003468	5.77	12.289	3	1630.03	0.0109617	0
sGkPAELLk	1	A0A0B4J1R6	N-Term(TMT10); K3(TMT10); K9(TMT10)	0.0007273	8.67	3.53841	3	1630.05	0.403312	0	0.815592	1		1.03085	1		1.03151	1		1.05298	1		0.823865	1		1.1158	1		1.07609	1		1.03874	1		1.09844	1
hYQINQQWER	26	A0A024R462	N-Term(TMT10)	1.464e-05	41.97	0.0185104	2	1630.83	0.448896	0	1.08506	26	13.4355	0.840049	26	12.4575	0.968928	26	11.0193	0.904083	26	7.59305	1.24619	26	20.3645	1.04032	26	13.84	1.21903	26	20.3757	1.0467	26	11.2432	0.747926	26	17.1757
yENYELTLk	36	C0JYY2	N-Term(TMT10); K9(TMT10)	5.366e-06	49.71	0.000715198	2	1630.91	0.874867	0	1.2189	36	4.58639	0.864286	36	6.60849	1.00569	36	15.4586	1.12673	36	3.86872	0.978065	36	19.5047	1.04154	36	12.43	0.967387	36	12.2949	0.944259	36	8.44585	0.818934	36	12.9531
gLLLYGPPGTGk	2	P55072	N-Term(TMT10); K12(TMT10)	1.568e-05	48.74	0.00068701	2	1631	3.75963	0	0.792346	1		0.99088	1		1.11645	1		1.05465	1		0.890813	1		0.972845	1		0.792801	1		1.43924	1		0.885754	1
gNSYFMVEVk	8	A8K1K1	N-Term(TMT10); K10(TMT10)	5.425e-06	43.9	0.00261131	2	1631.88	-3.00375	0	1.16104	8	3.00866	0.925562	8	5.43316	1.1473	8	6.48422	1.00758	8	4.22379	1.23547	8	12.6534	0.853415	8	6.40926	0.807115	8	3.96424	1.03729	8	7.3532	0.896035	8	11.3177
aLASQLQDSLk	6	A0A024QZN4;B4E3Q9	N-Term(TMT10); K11(TMT10)	1.048e-05	61.83	4.59958e-05	2	1631.98	5.84589	0
kQEIVAEk	8	B4DMH3	N-Term(TMT10); K1(TMT10); K8(TMT10)	0.001813	37.83	0.00801007	2	1632.04	3.1338	1	0.544561	8	13.7247	0.920888	8	4.16016	1.02836	8	7.57325	1.07734	8	4.01939	0.896722	8	5.28601	1.16419	8	9.09154	0.949664	8	10.6808	1.02573	8	2.39493	1.51065	8	8.18741
mYYSAVDPTk	42	P00450	N-Term(TMT10); K10(TMT10)	3.885e-05	52.68	0.000307251	2	1632.87	0.965631	0	1.08343	41	4.81829	1.04497	42	4.97342	1.09882	42	6.94359	0.968932	42	4.58697	0.737202	41	17.9879	0.750828	42	8.04749	1.02894	42	3.97575	1.22001	42	7.87051	1.221	42	7.73953
sLScRPPMVk	1	P04275;L8E853	N-Term(TMT10); C4(Carbamidomethyl); K10(TMT10)	0.004115	9.28	9.82027	3	1632.93	-1.09727	0
dINYVNPVIk	26	P01031	N-Term(TMT10); K10(TMT10)	1.872e-06	63.92	3.49954e-05	2	1632.97	-1.4041	0	1.22445	26	5.56251	0.974843	26	4.11598	1.16609	26	5.11694	0.966066	26	4.01898	0.881714	26	10.8746	0.913421	26	9.60834	1.24296	26	7.71991	0.901082	26	5.74786	0.961808	26	6.152
cFDHHFLEGSR	12	P05160	N-Term(TMT10); C1(Carbamidomethyl)	0.0005173	42.57	0.000810658	3	1633.78	0.74646	0	1.04036	12	12.8595	1.06353	12	9.45493	1.01434	12	8.3687	1.01476	12	8.37439	1.04707	12	8.27345	0.973004	12	9.03937	1.03341	12	9.84734	0.742635	12	12.1254	1.03351	12	7.72383
sWPAVGNcSSALR	5	P02790	N-Term(TMT10); C8(Carbamidomethyl)	7.488e-07	38.47	0.048409	2	1633.83	-0.0138275	0	1.13444	5	8.0247	1.02384	5	5.12464	1.14119	5	8.18839	0.935112	5	5.36934	0.935233	5	4.67862	0.894089	5	2.88327	1.05212	5	8.81132	1.14578	5	4.36087	1.02634	5	18.6348
eNYPLPWEk	11	P80108	N-Term(TMT10); K9(TMT10)	0.002337	29.73	0.0775228	3	1633.9	-0.282501	0	1.19341	11	7.81898	0.918571	11	7.43071	0.990296	11	6.73192	1.11313	11	1.61784	1.05097	11	29.7807	0.922611	11	6.87961	0.984908	11	9.27075	1.01972	11	10.9057	0.83411	11	10.5921
iLASTQFEPTAAR	1	A0A0A7E7X3	N-Term(TMT10)	2.804e-05	45.72	0.00218352	2	1633.91	-0.581091	0	0.956039	1		0.969532	1		0.936227	1		1.00321	1		0.9937	1		1.02088	1		1.0335	1		1.14638	1		1.00156	1
lVGITSWGEGcAR	16	P03952	N-Term(TMT10); C11(Carbamidomethyl)	5.944e-08	58.22	7.60083e-05	2	1634.85	-0.103324	0	1.12861	16	5.05633	0.996285	16	7.16924	0.993399	16	9.38249	1.10374	16	6.58725	0.97029	16	11.0645	0.913247	16	6.44477	0.976819	16	8.31668	1.0404	16	10.5792	0.862689	16	9.98629
vAWHYDEEk	19	C0JYY2	N-Term(TMT10); K9(TMT10)	1.247e-05	47.95	0.000805631	2	1634.86	1.51931	0	1.27543	19	5.65116	0.823389	19	7.31903	1.02235	19	5.20304	1.08097	19	3.39598	0.987153	19	6.19571	1.05437	19	5.0295	1.02988	19	3.11881	0.98019	19	7.09066	0.727122	19	6.33409
eVPLNTIIFmGR	8	P01008	N-Term(TMT10); M10(Oxidation)	2.969e-05	48.07	0.00126792	3	1634.91	0.512362	0	1.14635	8	5.53359	0.931643	8	1.5546	0.965519	8	9.42535	1.03215	8	8.71146	1.03547	8	6.59799	0.978951	8	3.25423	1.02941	8	16.5774	1.00273	8	7.48506	0.897906	8	11.7624
sADTLWDIQk	13	P07195	N-Term(TMT10); K10(TMT10)	3.97e-06	54.57	0.000285597	2	1634.92	0.527283	0	0.752345	13	7.33655	0.998281	13	5.47143	1.00056	13	8.37856	1.20171	13	3.23622	0.87367	13	14.823	1.08543	13	5.00107	0.971156	13	10.5382	0.995801	13	5.80208	1.09565	13	4.52442
fLLYGLHEGk	1	A0A140T8Z8	N-Term(TMT10); K10(TMT10)	0.0005793	35.34	0.0251038	3	1634.97	2.53843	0	1.22647	1		1.03531	1		1.10422	1		1.1693	1		0.891978	1		0.83205	1		1.03255	1		1.09692	1		0.576762	1
aYSLFSYNTQGR	12	P02743	N-Term(TMT10)	4.037e-07	57.86	7.48025e-05	2	1635.83	-1.15115	0	1.17394	12	6.79698	1.08212	12	5.95432	1.33404	12	4.34685	1.00002	12	6.51752	0.9919	12	20.0864	0.835402	12	7.72042	1.09653	12	11.545	0.95655	12	10.3776	0.623975	12	11.3793
fSGTWYAmAk	1	Q5VY30	N-Term(TMT10); M8(Oxidation); K10(TMT10)	9.719e-05	42.31	0.00338688	3	1635.86	-1.34409	0	1.18	1		1.12177	1		1.21314	1		0.999498	1		0.904766	1		1.02473	1		0.953409	1		0.830553	1		0.908844	1
yEITTIHNLFR	12	P05546	N-Term(TMT10)	8.581e-07	63.14	3.96481e-05	3	1635.91	0.764838	0	1.06949	12	6.20566	1.04721	12	13.0638	1.08223	12	10.324	1.00947	12	6.07437	0.978715	12	14.9591	0.987771	12	7.90898	1.13261	12	11.0919	0.960215	12	1.70076	0.796806	12	19.0848
qFVFDLHSGk	1	Q9BS26	N-Term(TMT10); K10(TMT10)	0.0005499	28.46	0.126451	3	1635.93	1.00256	0	0.979305	1		0.933208	1		1.07715	1		1.07099	1		0.989697	1		1.06018	1		0.887489	1		1.00899	1		1.06133	1
eITALAPSTmk	10	P60709;P63261;A8K3K1;Q13707	N-Term(TMT10); M10(Oxidation); K11(TMT10)	0.0002121	65.02	2.94472e-05	2	1635.94	2.7023	0
iTHLPGALLDk	2	P40197	N-Term(TMT10); K11(TMT10)	6.864e-05	31.9	0.0363826	3	1636.02	-0.102583	0	0.77351	2	19.2323	0.815436	2	11.9789	0.794729	2	19.5623	1.15321	2	27.9091	0.998551	2	18.2763	0.997033	2	8.10966	0.679784	2	10.6826	1.36779	2	20.1764	1.25272	2	6.99705
sIVNYkPk	2	P12814	N-Term(TMT10); K6(TMT10); K8(TMT10)	0.0006546	27.75	0.0669003	2	1636.04	2.14505	0	0.415969	2	38.6285	0.918819	2	12.5068	1.18927	2	5.81744	1.13603	2	0.677816	0.879263	2	8.18681	1.19765	2	4.91147	0.863435	2	7.08691	1.02664	2	14.3902	1.43123	2	18.9837
aVVFLEPQWYR	2	P08637	N-Term(TMT10)	0.0001214	24.84	0.249516	2	1636.91	0.758888	0	1.14438	2	3.02651	1.07393	2	4.22425	1.04727	2	7.58945	0.913449	2	3.29983	0.770934	2	7.71987	0.921025	2	5.03786	1.31747	2	2.1208	1.27988	2	19.2958	0.581368	2	27.8917
vLVDHFGYTk	26	C0JYY2;Q7Z7Q0	N-Term(TMT10); K10(TMT10)	8.008e-06	54.29	0.000274639	2	1636.95	1.56684	0
wDEELAAFAk	6	Q6UXB8	N-Term(TMT10); K10(TMT10)	3.787e-07	67.04	1.37597e-05	2	1637.9	1.92138	0	1.10989	6	2.32439	1.0183	6	8.42283	0.992933	6	6.38907	0.893544	6	2.72653	0.839112	6	4.11901	1.02	6	3.51544	1.28507	6	6.22778	1.1054	6	2.66674	0.884795	6	5.68008
vIcILSHPIk	1	P50395	N-Term(TMT10); C3(Carbamidomethyl); K10(TMT10)	0.0004672	28.81	0.0605661	3	1638.02	2.12088	0	0.8349	1		0.964878	1		0.893604	1		0.99719	1		0.960009	1		1.02898	1		0.921643	1		1.40774	1		0.955534	1
dIPMNPMcIYR	30	P01008	N-Term(TMT10); C8(Carbamidomethyl)	0.000126	43.19	0.00121373	3	1638.8	-0.172861	0	1.01764	29	9.25243	0.941364	29	5.41822	0.979347	29	7.68676	1.06753	30	5.3307	0.982557	29	22.7787	0.94011	30	7.43436	1.0924	30	6.96187	1.11462	30	7.09174	0.981692	30	10.7265
nMEVSVATTTk	38	C0JYY2;Q59HB3	N-Term(TMT10); K11(TMT10)	1.203e-07	75.02	2.53394e-06	2	1638.92	1.56937	0
iYHSHIDAPk	73	P00450	N-Term(TMT10); K10(TMT10)	1.046e-06	66.05	1.96664e-05	2	1638.94	0.440712	0	1.03107	73	9.97615	0.9632	73	7.31453	1.03107	73	7.54051	0.992464	73	7.34035	0.917711	73	10.3687	0.984578	73	7.08918	1.1271	73	8.04628	0.919428	73	9.47586	1.12321	73	13.0075
vSLAGAcGVGGYGSR	1	P13647	N-Term(TMT10); C7(Carbamidomethyl)	1.747e-05	42.12	0.00270976	2	1639.84	-0.355416	0	1.1471	1		0.964548	1		1.09592	1		0.918451	1		0.897931	1		1.0235	1		1.08093	1		1.04448	1		0.988166	1
iLSGDPYcEk	14	P43251	N-Term(TMT10); C8(Carbamidomethyl); K10(TMT10)	7.396e-05	54.72	0.000180449	2	1639.88	0.610884	0	1.12147	14	2.56015	0.872594	14	3.26169	0.944995	14	7.00913	1.04926	14	4.46842	0.945398	14	10.025	0.989486	14	4.05444	1.07939	14	2.93555	1.11219	14	2.39248	0.972393	14	3.85683
aVLFcLSEDk	2	P23528	N-Term(TMT10); C5(Carbamidomethyl); K10(TMT10)	8.91e-06	38.84	0.00896033	2	1639.92	2.60661	0	0.72766	2	5.63167	0.981739	2	12.1687	0.960199	2	2.30048	1.07773	2	4.33009	1.1377	2	7.19316	1.1933	2	1.03923	0.951534	2	5.14285	1.00798	2	13.8679	0.973985	2	6.90979
tVTDMLMTIcAR	2	Q9Y490	N-Term(TMT10); C10(Carbamidomethyl)	2.778e-06	34	0.0129385	2	1640.84	0.290573	0	0.737069	2	4.34681	1.0479	2	6.60925	0.940956	2	4.27757	1.02631	2	8.1109	0.895439	2	11.7791	1.06546	2	8.19005	1.05423	2	0.0803335	1.1947	2	6.23642	1.0633	2	10.4388
qTIIVVLENVQR	20	C0JYY2	N-Term(TMT10)	1.295e-06	66.73	1.09772e-05	3	1640.99	2.11147	0	1.15368	20	5.65206	1.00708	20	6.18314	1.07243	20	15.0917	1.0649	20	4.29927	1.08735	20	17.0839	0.929779	20	12.0813	0.936034	20	6.75997	0.95172	20	11.2304	0.705667	20	15.4917
yHWEHTGLTLR	24	C0JYY2;Q59HB3	N-Term(TMT10)	3.256e-06	53.16	0.000259886	4	1641.87	0.279397	0
iQNVLSEkPR	1	Q15166	N-Term(TMT10); K8(TMT10)	0.0008372	23.79	0.191157	3	1642	-1.47596	0	0.935132	1		0.806194	1		0.854188	1		0.960735	1		1.17951	1		1.086	1		1.00678	1		1.15515	1		1.10923	1
kPIQEVLk	1	B4E1R1	N-Term(TMT10); K1(TMT10); K8(TMT10)	0.0003587	7.34	2.69372	3	1642.09	0.212654	0	1.04149	1		1.3786	1		0.881346	1		0.801088	1		1.47881	1		0.876376	1		0.951897	1		0.892951	1		0.832708	1
kIcLDPDAPR	13	P02775	N-Term(TMT10); K1(TMT10); C3(Carbamidomethyl)	0.007204	23.54	0.570496	2	1642.94	0.122362	1	0.412211	13	33.8261	1.14548	13	6.14654	0.915463	13	8.77855	1.11094	13	4.82641	0.78772	13	3.19366	1.14477	13	5.93364	0.828273	13	9.32793	1.12555	13	6.88424	1.52957	13	7.37001
iQNILTEEPk	51	P27169	N-Term(TMT10); K10(TMT10)	5.784e-07	58.43	0.000151085	2	1642.98	0.240936	0	0.89569	51	6.1621	0.773384	51	7.04023	0.808977	51	8.49104	1.10832	51	5.45777	0.788265	51	14.0446	1.13021	51	5.44544	1.30505	51	6.29511	1.14111	51	3.74175	1.09623	51	7.84309
ecDcDAQck	7	A0A0U1RR20	N-Term(TMT10); C2(Carbamidomethyl); C4(Carbamidomethyl); C8(Carbamidomethyl); K9(TMT10)	0.002144	42.93	0.000303052	2	1643.73	1.62689	0	1.02353	7	8.15739	0.778853	7	2.79106	1.0481	7	4.58524	0.926617	7	0.730781	1.00507	7	18.6793	1.00997	7	5.79943	1.14832	7	6.04869	0.888179	7	5.15317	1.41863	7	2.81279
cLPVTAPENGk	4	P08603;A8K5T0	N-Term(TMT10); C1(Carbamidomethyl); K11(TMT10)	1.739e-05	53.09	0.000458017	2	1643.92	1.68092	0
sNTVASLHTEk	22	C0JYY2	N-Term(TMT10); K11(TMT10)	1.507e-08	70.75	6.03701e-06	2	1644.93	1.50317	0	1.19071	22	11.1887	0.903053	22	8.47564	0.959674	22	8.98211	1.17351	22	5.70626	0.981399	22	6.69493	1.13088	22	8.58363	1.08046	22	6.29526	0.59364	22	16.7609	1.05541	22	5.05367
gPSVFPLAPSSk	3	S6B2A6;V9HW68;Q6MZQ6;Q6N094;Q6GMX6;Q6N089;Q6N095;P0DOX5;S6BGE0;S6BGD4;Q9Y509	N-Term(TMT10); K12(TMT10)	3.874e-06	52.28	0.0004206	2	1644.97	-0.144478	0
dLHLSDVFLk	5	P13671;A8K8Z4	N-Term(TMT10); K10(TMT10)	6.252e-05	49.06	0.000867915	3	1644.97	0.372884	0
aDGLAVIGVLMk	6	P00915	N-Term(TMT10); K12(TMT10)	3.815e-09	80.64	4.31489e-07	2	1645.02	2.46181	0	0.992324	6	2.01667	1.06108	6	1.97626	1.44303	6	4.41548	1.07603	6	5.44762	0.789259	6	6.77141	0.763723	6	6.94717	1.04701	6	7.22319	1.13207	6	4.60585	0.827656	6	6.98196
hQGVMVGmGQk	28	P60709;P63261;A8K3K1;Q13707;Q562R1	N-Term(TMT10); M8(Oxidation); K11(TMT10)	1.45e-05	55.04	0.000280586	3	1645.9	2.05817	0
lAQAAQSSVATITR	5	Q9Y490	N-Term(TMT10)	1.49e-10	68.71	1.00065e-05	2	1645.94	0.0837297	0	0.61428	5	48.1072	1.11233	5	9.67063	1.02844	5	2.57524	1.05197	5	2.0972	0.897943	5	10.078	0.993936	5	14.4392	0.954508	5	8.75109	0.97974	5	9.95812	1.20744	5	2.851
hYDGSYSTFGER	38	P01023	N-Term(TMT10)	3.75e-06	52.39	5.62347e-05	3	1647.76	1.30352	0	1.35199	38	20.135	1.3455	38	9.27992	1.33595	38	14.237	1.39099	38	21.113	1.48666	38	20.5516	0.53911	38	56.265	0.587999	36	53.4558	0.44466	36	60.7781	0.483421	33	98.7775
vTEIWQEVMQR	2	P08294	N-Term(TMT10)	1.78e-06	48.02	0.000948933	2	1647.88	3.29882	0	1.00211	2	1.12638	0.770049	2	8.93148	0.800535	2	7.78503	0.76774	2	2.02001	0.751566	2	0.270297	0.848594	2	3.24196	1.13676	2	8.22838	2.12599	2	4.70882	0.723991	2	2.64138
aFQVWSDVTPLR	1	P08253	N-Term(TMT10)	3.315e-05	25.95	0.187397	2	1647.91	2.00851	0	1.20005	1		1.04289	1		0.979143	1		0.923759	1		0.854847	1		1.02218	1		1.20989	1		1.06007	1		0.829929	1
kYFTNck	1	Q15582	N-Term(TMT10); K1(TMT10); C6(Carbamidomethyl); K7(TMT10)	0.003247	13.44	4.09646	3	1647.95	-0.0140914	1	1.2617	1		0.998592	1		0.982237	1		0.944011	1		0.85775	1		0.823695	1		1.14688	1		1.26782	1		0.789284	1
mSGDLLELALk	2	Q8NBP7	N-Term(TMT10); K11(TMT10)	2.318e-06	47.7	0.00146898	2	1647.98	-0.217221	0	1.10942	2	2.9354	1.05089	2	1.84298	0.886964	2	1.96801	1.10405	2	5.544	0.907826	2	9.73207	0.989323	2	0.417496	1.0788	2	4.32528	1.07823	2	4.60836	0.772991	2	6.59874
iTGFLkPGk	2	Q8TCF0	N-Term(TMT10); K6(TMT10); K9(TMT10)	0.0004553	32.57	0.0137508	2	1648.08	1.66493	0	1.36037	2	0.126637	0.998351	2	1.10146	1.21881	2	4.97827	0.714658	2	0.784468	0.869343	2	0.0808348	0.687895	2	1.54765	1.22533	2	0.0603171	1.23202	2	4.49651	0.986744	2	3.4199
mYYSAVDPTk	13	P00450	N-Term(TMT10); M1(Oxidation); K10(TMT10)	0.0009015	38.89	0.00721792	3	1648.87	-0.0397617	0	1.06093	13	7.27678	1.0027	13	4.19777	1.07993	13	4.80029	0.950835	13	6.33149	0.780286	13	9.20499	0.809716	13	13.2329	1.05434	13	7.42786	1.12513	13	8.53046	1.33549	13	7.79026
vcMVYDLYk	1	B2R7P8	N-Term(TMT10); C2(Carbamidomethyl); K9(TMT10)	1.738e-05	42.9	0.00319513	2	1648.89	0.885741	0	0.622535	1		0.986114	1		1.05718	1		1.23974	1		0.868524	1		1.11581	1		0.871944	1		1.0568	1		1.15115	1
cPLFEHFLk	2	A8K6K4	N-Term(TMT10); C1(Carbamidomethyl); K9(TMT10)	0.000661	28.55	0.106473	3	1648.93	0.46463	0	1.12265	2	2.55321	0.990714	2	4.23958	1.0783	2	1.27268	1.0215	2	0.582539	1.06625	2	11.6672	0.992967	2	5.85893	1.07231	2	5.09772	0.988712	2	3.7233	0.743871	2	5.24661
qVLDNLTMEk	7	P35527	N-Term(TMT10); K10(TMT10)	0.0003144	36.76	0.0158253	3	1648.94	0.67057	0	1.07212	7	6.4014	1.03337	7	3.14398	0.895708	7	5.83365	0.948127	7	4.66451	0.783658	7	2.23741	1.3228	7	4.21709	1.09133	7	3.90703	0.983844	7	4.94515	0.833818	7	7.28526
eLHINLIPNk	3	P07900	N-Term(TMT10); K10(TMT10)	0.0002585	24.53	0.217589	3	1649.02	0.0828411	0	0.692277	3	1.62319	1.01864	3	7.4512	1.02441	3	5.38827	1.06997	3	3.52168	0.9937	3	1.96362	1.10734	3	5.20873	0.904888	3	4.08749	0.993794	3	5.19039	1.28796	3	9.42198
kESPLLFk	1	P26038	N-Term(TMT10); K1(TMT10); K8(TMT10)	0.0008314	15.71	0.945241	3	1649.06	1.507	1	0.996638	1		0.852482	1		1.07129	1		1.05983	1		0.778354	1		1.04421	1		0.946586	1		1.19875	1		1.1072	1
yEDLYSNck	9	P54108	N-Term(TMT10); C8(Carbamidomethyl); K9(TMT10)	0.0001263	45.7	0.00229588	2	1649.82	-0.911403	0	1.08338	9	4.85603	0.943339	9	2.43128	1.02658	9	10.1588	1.02355	9	9.06813	1.01326	9	10.4598	1.02803	9	5.52078	1.05698	9	4.53409	0.972841	9	3.88941	0.922461	9	7.08254
dIFTGLIGPMk	9	P00450	N-Term(TMT10); K11(TMT10)	2.299e-07	68.4	1.29222e-05	2	1649.97	-0.150953	0	1.06412	9	6.23378	1.0631	9	2.4228	1.06489	9	11.0489	0.993756	9	5.9607	0.696613	9	19.59	0.735532	9	15.8366	1.03989	9	8.60454	1.30456	9	6.63413	1.10701	9	12.7113
yAPLHLVPLIER	1	Q7L576	N-Term(TMT10)	1.756e-05	31.59	0.052839	3	1649.99	-0.0925235	0	0.909494	1		0.981728	1		0.978733	1		1.06613	1		0.926357	1		1.01914	1		0.897025	1		1.14615	1		1.10078	1
eALVPLVADHk	17	Q04756	N-Term(TMT10); K11(TMT10)	4.538e-06	49.5	0.000813463	3	1650	-1.0398	0	1.09543	17	4.8694	0.92221	17	9.41463	0.884261	17	8.20743	0.948269	17	5.76583	0.874315	17	7.07197	1.11793	17	8.23909	1.05248	17	5.39585	1.16469	17	3.97472	1.09875	17	9.70269
iDVHLVPDRk	9	P08603;A8K5T0	N-Term(TMT10); K10(TMT10)	0.0001114	24.38	0.225053	3	1650.01	1.47587	1
gYEEWLLNEIR	5	O43707;P12814	N-Term(TMT10)	1.085e-05	50.47	0.000505701	2	1650.87	-0.517127	0
vFSLQWGEVk	6	G3XAM2	N-Term(TMT10); K10(TMT10)	3.587e-07	49.39	0.000859648	2	1650.96	-0.691883	0	1.16697	6	4.68803	1.02988	6	3.37513	1.10494	6	8.66379	0.946264	6	5.59914	0.897956	6	4.75145	0.93235	6	3.26683	1.02636	6	6.75986	1.19596	6	6.17253	0.795032	6	6.48413
gPWcFTTDPSVR	16	P00747	N-Term(TMT10); C4(Carbamidomethyl)	1.571e-05	55.69	0.000123691	2	1651.81	0.91641	0	1.13482	16	10.3769	0.908147	16	8.30185	1.00572	16	6.55393	0.999008	16	6.06353	0.972564	16	7.41762	0.967001	16	10.8359	1.09618	16	4.4195	1.06438	16	3.81154	0.902869	16	10.6974
iGcGSHFcEk	7	Q6UXB8	N-Term(TMT10); C3(Carbamidomethyl); C8(Carbamidomethyl); K10(TMT10)	1.379e-05	44.12	0.00157614	2	1652.84	4.99293	0	1.16192	7	5.44525	0.980029	7	8.33578	1.00048	7	10.4422	0.974458	7	0.751536	0.891293	7	7.64966	1.00477	7	2.0679	1.18151	7	4.02235	0.909515	7	3.45294	0.986864	7	8.90355
sSQESYAHGTk	4	P08603;A8K5T0	N-Term(TMT10); K11(TMT10)	6.955e-06	29.83	0.0501242	3	1652.86	-1.31136	0
gSGGLGGAcGGAGFGSR	2	B4DRR0	N-Term(TMT10); C9(Carbamidomethyl)	2.386e-07	84.93	8.72509e-08	2	1653.8	1.24821	0	1.12416	2	3.45052	0.958173	2	5.01931	1.35613	2	14.6752	0.935633	2	8.56417	0.706268	2	9.99598	1.32739	2	3.24452	1.16431	2	1.49334	0.921098	2	12.0686	0.640049	2	28.3613
fQLFGSPSGQk	1	B7ZAL5	N-Term(TMT10); K11(TMT10)	0.0009522	29.71	0.0734441	3	1653.93	-2.63145	0	1.14291	1		0.833504	1		1.14156	1		0.826869	1		1.02677	1		0.881859	1		0.863086	1		1.55004	1		0.785753	1
dIPMNPmcIYR	24	P01008	N-Term(TMT10); M7(Oxidation); C8(Carbamidomethyl)	0.003827	32.14	0.0120661	2	1654.8	-0.00399766	0	1.03949	23	6.31792	0.930015	23	6.70804	0.970226	23	7.36036	0.993962	23	6.01661	0.857228	23	10.4029	1.02404	23	5.61148	1.11554	23	5.95862	1.07252	23	10.4522	1.0857	23	16.7965
nAIWIDcGIHAR	6	Q96IY4	N-Term(TMT10); C7(Carbamidomethyl)	9.183e-08	45.45	0.00157234	2	1654.88	4.05737	0	1.22243	6	6.16946	1.01805	6	12.5375	0.997237	6	6.4892	0.929525	6	3.59022	0.814203	6	6.79124	0.904938	6	3.16194	1.17703	6	1.37396	1.06998	6	5.36023	0.940637	6	1.88494
vEPYGENFNk	19	P06727	N-Term(TMT10); K10(TMT10)	1.061e-06	45.84	0.00155066	2	1654.88	-0.0329317	0	1.23354	19	4.94743	0.933934	19	10.9298	1.06706	19	10.2838	0.85529	19	5.67039	0.962746	19	9.15246	0.977519	19	9.42838	1.12153	19	6.77237	1.04423	19	11.8434	0.952809	19	9.01608
nmEVSVATTTk	25	C0JYY2;Q59HB3	N-Term(TMT10); M2(Oxidation); K11(TMT10)	1.091e-05	67.48	1.33719e-05	2	1654.91	-0.093924	0
gWVTDGFSSLk	12	P02656	N-Term(TMT10); K11(TMT10)	4.15e-07	60.66	6.51132e-05	2	1654.92	0.764525	0	0.771227	12	18.3337	0.66329	12	19.168	0.663045	12	24.4887	1.90509	12	11.9972	1.08357	12	8.54528	1.13313	12	5.40034	0.562033	12	19.7722	0.878317	12	13.3357	0.788431	12	8.85513
iAQYYYTFk	5	P05160	N-Term(TMT10); K9(TMT10)	0.0001196	38.34	0.0111601	2	1654.92	0.0621452	0	1.31756	5	8.90679	0.966904	5	3.05027	1.2345	5	6.75713	1.02048	5	4.77879	0.923425	5	5.27408	0.845856	5	2.38323	1.12457	5	3.11158	1.17109	5	13.2419	0.406971	5	4.06419
hTLNQIDEVk	116	P02765;B7Z556	N-Term(TMT10); K10(TMT10)	1.536e-06	59.79	7.62493e-05	2	1654.95	-1.37538	0
lVDEDMNSFk	28	Q06033	N-Term(TMT10); K10(TMT10)	2.56e-06	61.78	2.87401e-05	2	1655.87	1.083	0	0.994348	28	5.71453	0.936205	28	8.3491	1.1323	28	6.10105	0.915856	28	5.28492	0.886793	28	5.8889	0.977158	28	5.4225	1.1992	28	4.043	1.01274	28	4.86594	1.15946	28	8.57534
gGSISGGGYGSGGGk	4	P35908	N-Term(TMT10); K15(TMT10)	1.336e-13	107.18	8.32701e-10	2	1655.87	-4.70085	0	0.75361	4	6.71324	0.840296	4	6.22236	1.04102	4	2.61244	0.702159	4	5.73971	0.841525	4	0.356679	1.25256	4	4.15623	1.44072	4	1.05373	1.54205	4	5.02688	0.773022	4	12.3894
gcDPLVkPVGR	1	B3KXC5	N-Term(TMT10); C2(Carbamidomethyl); K7(TMT10)	0.002271	8.11	11.3808	3	1655.97	0.246344	0	1.19709	1		1.0249	1		0.99043	1		0.933213	1		0.975295	1		0.751447	1		1.23879	1		1.0432	1		1.04161	1
aLSTDPAAPNLk	6	Q9Y490	N-Term(TMT10); K12(TMT10)	0.0005364	31.81	0.0568537	2	1655.97	0.889956	0	0.73008	6	16.9944	0.933762	6	9.16469	1.02824	6	6.86325	1.00804	6	7.60453	0.830728	6	2.16573	1.13104	6	6.67702	1.04544	6	5.79824	1.04818	6	8.88869	1.35988	6	3.17164
lAEGFPLPLLk	4	Q8TCF0	N-Term(TMT10); K11(TMT10)	3.187e-06	59.08	3.36796e-05	2	1656.05	0.436912	0	1.40769	4	7.1052	1.10221	4	4.90839	1.18321	4	8.53604	0.68474	4	6.92595	0.811102	4	13.1698	0.744036	4	4.16022	1.19551	4	6.82733	1.16087	4	3.48486	0.988062	4	2.20075
wAAVVVPSGExQR	6	U5YKD2	N-Term(TMT10); X11(E)	0.000371	32.43	0.146499	2	1656.9	2.9659	0	0.95546	2	26.8534	1.29399	2	14.5385	1.06614	2	10.8808	1.0775	2	2.38987	1.22682	2	22.6359	0.831897	2	15.5569	0.957429	2	14.4535	0.852007	2	5.78472	0.73345	2	7.34344
aFGPGLQGGSAGSPAR	2	P21333	N-Term(TMT10)	1.48e-05	71.51	3.40445e-06	2	1658.88	-1.47179	0	0.664437	2	28.8184	1.04352	2	7.02042	1.29572	2	11.111	0.869851	2	13.1094	0.72352	2	2.97023	1.24248	2	8.17564	1.04693	2	4.14086	0.750775	2	7.64977	1.67844	2	24.1601
yHGDPMPcPk	18	A8K2N0	N-Term(TMT10); C8(Carbamidomethyl); K10(TMT10)	0.001056	34.27	0.06416	2	1659.84	0.958122	0	1.06512	18	10.4853	0.912536	18	13.9818	0.965401	18	18.256	1.00353	18	5.11443	0.925179	18	22.1414	0.96283	18	8.03902	1.00815	18	15.7045	1.08715	18	16.2381	1.01465	18	15.7699
eWFSETFQk	9	K7ERI9	N-Term(TMT10); K9(TMT10)	4.445e-06	45.99	0.00472694	2	1659.88	0.893463	0	0.782168	9	9.65885	0.676276	9	11.5411	0.695507	9	12.3389	1.71592	9	10.5694	1.30877	9	8.05567	1.25326	9	11.6232	0.623371	9	20.093	0.764706	9	5.13684	0.777661	9	10.6921
iGkPAPDFk	2	B4DF70	N-Term(TMT10); K3(TMT10); K9(TMT10)	0.001892	12.12	3.26215	3	1660.04	0.24951	0	0.958009	2	7.66344	1.07339	2	3.80116	1.25923	2	2.75197	1.04487	2	2.59135	0.635705	2	8.38152	0.722106	2	9.57357	0.944046	2	2.29215	1.09815	2	5.83356	1.43449	2	2.1576
hEGSFIQGAEk	9	P13671;A8K8Z4	N-Term(TMT10); K11(TMT10)	1.226e-07	57.39	0.00012138	2	1660.91	1.46155	0
wSRPQAPITGYR	3	A0A024R462	N-Term(TMT10)	9.636e-06	28.97	0.0885455	3	1660.91	0.441112	0	1.2826	3	0.436109	0.860401	3	1.44874	1.05132	3	5.4047	0.980373	3	1.58764	1.15238	3	3.70847	0.856417	3	2.57562	1.28765	3	6.78711	1.09959	3	6.0222	0.647572	3	4.29403
nTGVISVVTTGLDR	3	B3GN61	N-Term(TMT10)	1.092e-05	34.54	0.0273514	2	1660.95	1.45757	0	1.03822	3	5.99742	1.19183	3	4.2837	1.03416	3	5.74085	0.925576	3	0.493297	0.803389	3	2.41963	0.999634	3	11.0507	1.03631	3	5.47161	1.11127	3	2.43433	0.881412	3	3.08851
dLTALSNMLPk	1	P15144	N-Term(TMT10); K11(TMT10)	2.049e-06	67.27	1.38281e-05	2	1660.97	1.1804	0	1.08243	1		1.02211	1		0.85163	1		0.865383	1		1.05215	1		0.982258	1		1.1835	1		1.15012	1		0.938462	1
iQTLSAIDTIk	3	Q3ZCW2	N-Term(TMT10); K11(TMT10)	7.335e-06	51.4	0.000464726	3	1661.03	0.51578	0	0.490768	3	7.69415	1.08774	3	4.4218	1.36478	3	9.28755	1.12068	3	9.11582	1.23273	3	20.0528	0.984847	3	20.6786	0.807855	3	18.0792	0.903933	3	23.4626	1.2279	3	21.9986
hQGVmVGmGQk	4	P60709;P63261;A8K3K1;Q13707;Q562R1	N-Term(TMT10); M5(Oxidation); M8(Oxidation); K11(TMT10)	5.323e-05	42.62	0.00477545	3	1661.89	-0.00683711	0
mATNAAAQNAIk	4	Q9Y490	N-Term(TMT10); K12(TMT10)	4.35e-10	88.16	1.23733e-07	2	1661.94	1.24882	0	0.551302	4	14.5529	1.0921	4	3.0932	1.08516	4	2.47279	1.08657	4	4.82616	0.837682	4	5.54042	1.12644	4	3.21802	0.915849	4	2.57114	1.03123	4	5.15759	1.30117	4	4.64049
wTLLQEQGTk	2	B4DRR0;P13647	N-Term(TMT10); K10(TMT10)	1.205e-06	48.68	0.00106789	2	1661.96	0.495363	0
vTSIQDWVQk	24	P00738	N-Term(TMT10); K10(TMT10)	4.327e-07	59.19	9.41736e-05	2	1661.96	1.22986	0	0.594016	24	17.9046	1.40974	24	7.62494	3.0326	24	10.9785	0.889285	24	3.64172	2.74093	24	16.6522	0.238274	20	112.13	0.316004	24	79.4444	0.409551	16	85.1521	0.258573	19	79.9809
dNPMYYcNk	14	O75882;B4DZ36	N-Term(TMT10); C7(Carbamidomethyl); K9(TMT10)	0.0003026	41.09	0.00396799	3	1662.8	-0.815472	0
aEMADQAAAWLTR	26	P0C0L5;A0A0G2JPR0	N-Term(TMT10)	1.216e-07	82.56	1.94674e-07	3	1662.85	0.665998	0
gFGFGQGAGALVHSE	2	Q6AI18	N-Term(TMT10)	6.425e-06	46.29	0.000824721	2	1662.85	2.78015	0	0.79928	2	7.75933	1.01857	2	9.80823	0.921043	2	7.05163	0.887191	2	10.8539	1.14237	2	1.34517	1.05747	2	1.21348	1.04713	2	6.82401	1.24484	2	14.7773	0.930812	2	23.0514
fDMIVPILEk	2	Q13418	N-Term(TMT10); K10(TMT10)	4.841e-06	46.76	0.00174911	2	1662.99	-1.25941	0	0.488193	2	36.6986	1.10935	2	0.721253	1.00488	2	2.76771	1.24286	2	0.0292936	0.873157	2	3.06501	1.15455	2	12.6323	0.836655	2	1.00224	1.07044	2	2.83757	1.12565	2	0.290479
aGNNMLLVGVHGPR	2	P21333	N-Term(TMT10)	1.651e-09	71.36	6.65702e-06	2	1663.93	2.4185	0	0.492597	2	18.9622	1.02994	2	0.822725	1.51299	2	18.3672	0.864176	2	1.20407	0.809189	2	9.89046	1.31181	2	8.86163	0.807303	2	27.959	0.801195	2	30.9162	1.64234	2	19.9595
lFDEINPETk	15	Q9UK55;B2RBZ5	N-Term(TMT10); K10(TMT10)	3.089e-06	52.09	0.000563631	2	1663.93	0.628027	0
nkFDPSLTQR	2	P08697	N-Term(TMT10); K2(TMT10)	0.006319	14.98	3.21658	3	1663.95	0.0702891	1	0.968119	2	7.30937	0.906956	2	3.55643	0.961604	2	12.4317	1.05107	2	1.73937	1.07479	2	6.4006	0.782618	2	6.62458	0.913636	2	4.23255	1.30972	2	8.35087	1.04238	2	7.8729
dEPTYILNIk	11	C0JYY2;Q7Z7Q0	N-Term(TMT10); K10(TMT10)	3.708e-06	59.79	0.000105164	2	1663.97	3.12646	0
kLELHLPk	6	B2R815	N-Term(TMT10); K1(TMT10); K8(TMT10)	0.0009638	18.43	0.229678	3	1665.1	-0.00348561	1	1.23435	6	5.73171	0.933151	6	5.863	0.953446	6	5.91795	0.945118	6	1.62649	0.78192	6	6.9542	0.928163	6	2.36248	1.10939	6	3.45019	1.13778	6	17.4691	1.07552	6	12.8877
sLMLHYEFLQR	7	B7Z550	N-Term(TMT10)	9.236e-06	45.77	0.00241278	3	1665.9	0.444669	0	1.15764	7	10.4627	1.09105	7	5.04677	1.12636	7	7.35917	1.0586	7	6.24822	1.0413	7	11.0176	0.837254	7	2.42849	0.974126	7	10.4404	0.942856	7	20.302	0.788125	7	17.7989
gNWGHLDQVAALR	1	B7Z795	N-Term(TMT10)	0.0003348	21.85	0.595982	3	1665.9	0.106052	0	1.14739	1		0.742993	1		0.828525	1		1.13568	1		1.0182	1		1.22171	1		1.00082	1		1.10162	1		0.753256	1
nVVFVIDISGSMR	26	P19827;B7Z539	N-Term(TMT10)	4.831e-07	55.21	0.000307477	2	1665.92	3.21206	0
lGVQDLFNSSk	1	B4E3A8	N-Term(TMT10); K11(TMT10)	7.868e-06	30.17	0.0769771	2	1665.96	1.19872	0	0.564275	1		1.06449	1		0.882054	1		1.0908	1		0.900378	1		1.08505	1		0.886698	1		1.10638	1		1.46363	1
dIFTGLIGPmk	4	P00450	N-Term(TMT10); M10(Oxidation); K11(TMT10)	1.699e-05	55.46	0.000233104	3	1665.97	2.78479	0	1.11428	4	4.79615	1.05096	4	1.15002	1.08706	4	4.17925	0.927704	4	3.79207	0.78852	4	4.2569	0.855564	4	1.17453	1.0437	4	2.56314	1.0952	4	1.03588	1.18507	4	2.74457
kEFQEGLk	8	A0A024CIM4	N-Term(TMT10); K1(TMT10); K8(TMT10)	0.0008161	31.32	0.0433519	2	1666.02	1.03331	1	0.997332	8	4.27486	0.894745	8	5.42806	0.883598	8	5.8131	0.972302	8	4.53123	0.938748	8	3.38305	1.07292	8	3.46353	1.02697	8	2.7426	1.19213	8	2.76104	1.08208	8	5.0148
kLNELSFk	6	C0JYY2	N-Term(TMT10); K1(TMT10); K8(TMT10)	0.001932	33.55	0.017155	2	1666.05	1.25127	1	1.22007	6	1.60823	0.638407	6	8.53416	0.876997	6	6.92378	1.24778	6	0.500114	0.830556	6	5.25179	1.22657	6	3.24977	1.01602	6	2.10807	1.17638	6	6.46121	0.740576	6	1.40025
gLGEISAASEFk	6	H7BYX6	N-Term(TMT10); K12(TMT10)	2.49e-10	83.66	5.33853e-07	2	1666.94	0.672682	0	1.21804	6	4.63978	0.948723	6	2.18687	0.958292	6	3.93574	0.976947	6	3.48023	0.91008	6	7.478	1.04333	6	5.4516	1.14446	6	7.45281	1.00159	6	3.30781	0.907206	6	5.4867
iMADSGPIYDk	7	P07996;A0A024R9Q1	N-Term(TMT10); K11(TMT10)	1.342e-06	58.67	8.59812e-05	2	1667.91	-0.390393	0
kGYTQQLAFR	3	P01024	N-Term(TMT10); K1(TMT10)	5.045e-05	24.69	0.215492	3	1669.98	1.50014	1	1.14047	3	0.0721571	1.01614	3	2.47755	1.11267	3	3.63685	0.888743	3	1.72829	1.07766	3	4.22296	0.785766	3	2.80867	1.09988	3	1.67332	1.10482	3	5.72202	0.976811	3	5.19405
eGWIHTVcINGR	4	P08603;A8K5T0	N-Term(TMT10); C8(Carbamidomethyl)	0.0002479	27.61	0.135323	3	1670.86	0.810348	0
dSPSVWAAVPGk	17	P07737	N-Term(TMT10); K12(TMT10)	1.947e-06	57.65	0.000109087	2	1671.95	0.276363	0	0.516363	16	20.1017	1.04766	17	3.19857	0.92307	17	5.93702	1.16036	17	2.45857	0.870006	17	3.73949	1.1578	17	6.6371	0.937408	17	6.45006	1.02924	17	5.99796	1.41323	17	6.71327
lLGELLQDNAk	2	P37837	N-Term(TMT10); K11(TMT10)	3.443e-06	52.03	0.000406986	2	1672	0.121436	0	0.560263	2	23.3274	0.995073	2	8.8169	0.924937	2	2.56386	1.1038	2	3.30218	0.895492	2	6.61285	1.25438	2	10.753	0.935998	2	15.6463	0.968542	2	3.28895	1.40667	2	15.4023
aSIHEAWTDGk	7	O43707;P12814	N-Term(TMT10); K11(TMT10)	1.957e-05	34.49	0.0213734	3	1672.91	-0.344715	0
eLLDTVTAPQk	28	P36955	N-Term(TMT10); K11(TMT10)	5.902e-07	53.57	0.000308778	2	1672.99	1.14215	0	1.25551	28	4.72725	1.02427	28	5.45875	1.0887	28	5.65132	0.91105	28	5.09058	0.823806	28	6.29292	0.933733	28	5.99357	1.10192	28	7.28023	1.04791	28	4.66614	0.995298	28	5.84878
lHLDYIGPck	8	B4DRV4	N-Term(TMT10); C9(Carbamidomethyl); K10(TMT10)	1.526e-05	41.72	0.00460989	2	1673.95	1.40621	0	0.665311	8	16.6959	1.02199	8	2.10238	0.907934	8	11.5073	1.00663	8	2.34247	0.908451	8	6.89929	1.13857	8	5.89524	0.927037	8	8.4638	1.11142	8	8.14771	1.35619	8	6.31303
aTEHLSTLSEk	12	P02647	N-Term(TMT10); K11(TMT10)	3.263e-07	52.5	0.00038436	2	1673.95	1.22177	0	0.626999	12	28.5736	0.657095	12	38.8978	0.689965	12	25.6362	1.31761	12	3.78805	3.68166	12	31.1368	0.482525	12	20.7814	0.633758	12	23.3497	0.346229	12	63.6526	0.462662	12	45.8182
dkEAcVHk	37	Q53H26;B4E1B2	N-Term(TMT10); K2(TMT10); C5(Carbamidomethyl); K8(TMT10)	0.00242	23.64	0.312924	2	1673.96	-1.38677	1
vIIEckPk	1	Q12860	N-Term(TMT10); C5(Carbamidomethyl); K6(TMT10); K8(TMT10)	0.005887	0.39	50.4133	3	1674.06	1.17621	0	1.11176	1		1.0883	1		1.09953	1		0.966548	1		1.49114	1		0.833614	1		0.878287	1		0.856213	1		0.801362	1
kQLVEIEk	10	P00739;P00738	N-Term(TMT10); K1(TMT10); K8(TMT10)	0.0002955	42.69	0.00256755	2	1674.08	1.04152	1
iLISGLEPSTPYR	1	A0A140T8Z8	N-Term(TMT10)	0.0005129	23.89	0.381574	2	1674.96	-0.890761	0	1.05124	1		1.04312	1		1.06408	1		0.963713	1		0.970034	1		1.01886	1		1.08403	1		1.08841	1		0.802266	1
rHPDLSIPELLR	28	P43652	N-Term(TMT10)	5.073e-08	58.77	0.000124974	3	1674.99	0.401655	1	1.07973	28	18.4583	0.928671	28	9.71926	1.00729	28	8.17201	0.886851	28	7.54467	0.989867	28	17.9609	1.03493	28	11.407	1.17872	28	14.7185	0.931769	28	13.7836	1.21928	28	16.3587
dTEDQEDQVDPR	8	B4E1C4	N-Term(TMT10)	4.826e-07	108.69	1.01405e-10	2	1675.76	1.37722	0	1.00907	8	12.7927	0.927925	8	4.2452	0.903079	8	7.10346	0.936136	8	9.98483	0.958991	8	16.9942	1.10793	8	6.02492	1.16382	8	6.48136	1.11389	8	4.22691	0.946861	8	12.6159
dFTcVHQALk	47	P05155	N-Term(TMT10); C4(Carbamidomethyl); K10(TMT10)	2.101e-07	66.8	1.8062e-05	2	1676.92	0.801866	0	1.13503	47	9.27519	1.09321	47	5.51619	1.16059	47	7.08754	0.95303	47	4.83086	1.08213	47	8.52344	0.862553	47	10.209	1.06092	47	6.19699	0.83887	47	8.21055	0.98135	47	7.82632
tMLESAGGLIQTAR	9	Q9Y490	N-Term(TMT10)	2.629e-08	78.65	1.19674e-06	3	1676.92	1.18258	0	0.774367	9	14.4731	1.02226	9	4.13569	1.03708	9	6.49923	1.09479	9	4.44718	0.955218	9	3.13121	1.09258	9	8.24987	0.8961	9	6.4805	0.96666	9	5.96791	1.14435	9	7.63323
lLDLVFLLDGSSR	1	P04275;L8E853	N-Term(TMT10)	6.825e-05	34.51	0.0394884	2	1676.98	1.34002	0
cPPPPLPINSk	4	P05160	N-Term(TMT10); C1(Carbamidomethyl); K11(TMT10)	0.0001454	42.33	0.00447949	2	1677.98	2.37959	0	1.11073	4	6.97245	1.02456	4	3.83549	1.06044	4	2.62804	0.975239	4	1.06148	0.899594	4	9.49934	0.971565	4	5.99829	1.04862	4	1.61237	0.97743	4	2.67919	0.993583	4	2.37741
aEmADQAAAWLTR	30	P0C0L5;A0A0G2JPR0	N-Term(TMT10); M3(Oxidation)	1.591e-05	69.56	3.98385e-06	2	1678.84	1.00623	0
aEMADQASAWLTR	12	P0C0L4	N-Term(TMT10)	7.012e-09	61.99	2.27984e-05	2	1678.84	1.15463	0	1.35358	12	10.846	1.99865	12	33.5559	1.43294	12	15.5849	0.667157	12	41.4352	1.05145	12	14.376	0.480682	12	63.0203	1.03587	12	7.44114	0.587177	12	40.1502	0.657642	12	25.7706
aSHTAPQVLFSHR	2	O15144	N-Term(TMT10)	9.194e-06	30.32	0.070555	3	1679.93	4.89802	0	0.983636	2	31.6359	1.00389	2	7.03101	1.13927	2	5.72477	0.974113	2	6.05116	1.04899	2	20.8344	1.00161	2	23.4127	0.992064	2	5.91229	0.889873	2	13.8126	1.07144	2	28.6364
ccSGAIIVLTk	2	P14618	N-Term(TMT10); C1(Carbamidomethyl); C2(Carbamidomethyl); K11(TMT10)	0.000204	50.73	0.000718487	2	1679.96	0.86993	0	0.416278	2	26.8554	0.89623	2	30.3258	1.1116	2	42.2627	1.05154	2	10.1135	0.874361	2	2.71977	1.03526	2	18.2109	1.07931	2	32.5956	1.31713	2	3.69569	1.18191	2	27.7153
lISVDTGFQNk	4	D6RE86	N-Term(TMT10); K11(TMT10)	5.561e-08	58.07	0.000135525	2	1679.97	0.519884	0	1.12315	4	7.78367	0.971868	4	2.22923	1.09543	4	6.73833	0.972834	4	5.70424	0.989665	4	3.58846	0.947171	4	5.38892	0.949793	4	1.36737	0.988064	4	7.21772	1.01429	4	17.8444
eTLFSVMPGLk	6	B2RMS9;B7ZKJ8;B7Z544	N-Term(TMT10); K11(TMT10)	5.248e-06	48.09	0.00126442	2	1679.99	5.26447	0
kLINDYVk	15	P01011	N-Term(TMT10); K1(TMT10); K8(TMT10)	0.002312	36.01	0.00820751	2	1680.07	0.505319	1	0.929104	15	7.86335	0.988673	15	4.59402	1.19958	15	6.76613	0.969682	15	6.79975	0.803605	15	8.78475	0.980704	15	7.67438	1.18966	15	7.81622	0.950312	15	5.27804	1.16136	15	7.30182
vDLITFDTPFAGR	3	P43251	N-Term(TMT10)	1.333e-06	34.94	0.0227645	2	1680.92	0.379677	0	1.10836	3	1.93851	0.985426	3	3.13706	0.920178	3	23.7356	1.12044	3	5.18259	0.835965	3	5.49164	0.863314	3	1.41131	0.897623	3	2.12104	1.32955	3	7.23038	0.858019	3	2.28744
yNALDLTNNGk	16	C0JYY2	N-Term(TMT10); K11(TMT10)	5.266e-07	62.78	4.04913e-05	2	1680.93	1.32573	0	1.22506	16	6.39054	0.958579	16	5.82963	0.965128	16	8.53959	1.0675	16	2.22886	1.04216	16	8.72613	1.04053	16	6.52932	0.903698	16	12.0235	0.961326	16	10.0401	0.861403	16	5.71295
dQLPYIcQFGIV	4	P05452;B2R582	N-Term(TMT10); C7(Carbamidomethyl)	0.001	49.27	0.000627604	2	1681.88	1.07703	0
nGIDIYSLTVDSR	12	B2RMS9;B7ZKJ8;B7Z544	N-Term(TMT10)	2.234e-08	65.96	1.40446e-05	2	1681.9	0.821153	0
hIcYFQIDk	1	P27487	N-Term(TMT10); C3(Carbamidomethyl); K9(TMT10)	0.0004983	27.78	0.11529	3	1681.91	0.1934	0	1.01309	1		1.11744	1		0.913393	1		0.974759	1		0.850212	1		0.991386	1		1.06463	1		1.17593	1		0.941185	1
nVVFVIDISGSmR	1	P19827;B7Z539	N-Term(TMT10); M12(Oxidation)	0.001191	40.06	0.00893076	3	1681.93	11.4224	0
sEYGAALAWEk	20	P13671;A8K8Z4	N-Term(TMT10); K11(TMT10)	4.126e-08	61.61	5.03185e-05	2	1682.92	0.439709	0
yGQPLPGYTTk	10	A6XND1	N-Term(TMT10); K11(TMT10)	5.169e-05	51.56	0.00050971	2	1682.95	1.17511	0	1.12371	10	3.42346	0.983472	10	5.44831	1.00684	10	9.60216	1.01384	10	4.51657	0.842218	10	3.38625	0.986813	10	5.99312	0.919835	10	6.79503	1.10428	10	6.3756	1.04963	10	6.3213
vWYMDGYHNNR	1	F5H810	N-Term(TMT10)	0.006421	11.03	1.00974	3	1683.8	4.52384	0	1.10996	1		0.97043	1		1.15806	1		1.00348	1		1.02177	1		0.917785	1		1.10959	1		0.987161	1		0.865158	1
dDEEFIESNk	7	P00450	N-Term(TMT10); K10(TMT10)	2.347e-06	49.02	0.00036905	2	1683.85	0.507831	0	1.14062	7	3.68615	0.936266	7	1.92176	1.05902	7	2.56564	0.9838	7	7.40229	1.04717	7	1.85519	1.0251	7	3.25919	1.13513	7	8.68378	0.991367	7	3.49961	0.900279	7	11.5499
dFLGFYVVDSHR	3	Q06033	N-Term(TMT10)	6.415e-05	44.33	0.00155893	3	1683.87	-0.167251	0	1.02865	3	4.68063	1.01182	3	9.65573	1.10975	3	15.9975	0.983367	3	3.83367	0.967519	3	15.9624	0.902779	3	21.0863	1.14754	3	23.8622	0.987979	3	2.20331	0.815482	3	0.938094
yDVENcLANk	44	P01023	N-Term(TMT10); C6(Carbamidomethyl); K10(TMT10)	8.869e-07	59.24	5.39633e-05	2	1683.88	1.2703	0	1.62615	44	13.7728	1.39988	44	5.1963	1.48148	44	5.28222	1.69086	44	11.0747	1.67511	44	11.317	0.27722	44	71.8277	0.318919	43	71.9768	0.293744	30	69.7104	0.320906	27	67.6273
sIEVFGQFNGk	12	A0A024R035	N-Term(TMT10); K11(TMT10)	4.901e-08	58.11	0.000112804	2	1683.95	0.642785	0	1.23942	12	12.2546	0.950542	12	4.89548	1.12865	12	4.9444	0.889045	12	9.95949	1.05619	12	20.1379	0.836258	12	14.4285	1.16336	12	7.49077	0.966134	12	4.28471	0.941033	12	15.6316
tFSEWLESVk	8	P13671;A8K8Z4	N-Term(TMT10); K10(TMT10)	2.056e-07	55.43	0.000197199	2	1683.94	0.503467	0
iSNIPDEYFk	30	P51884	N-Term(TMT10); K10(TMT10)	0.0003554	49.87	0.000717664	2	1683.94	0.799369	0	1.11516	30	4.45038	1.01132	30	6.5158	0.935695	30	5.97851	0.953489	30	4.63753	0.962303	30	8.51144	1.00942	30	5.68082	1.12036	30	5.57704	1.03548	30	6.93912	0.929197	30	4.96375
iRPHTFTGLSGLR	3	B0AZL7	N-Term(TMT10)	8.79e-05	33.6	0.0280025	4	1683.98	-1.54418	0	1.19546	3	1.03083	0.910156	3	4.97313	1.06746	3	1.5109	1.0662	3	2.96409	1.02087	3	4.07651	0.880444	3	4.20461	1.02011	3	11.1018	1.02393	3	9.92389	0.997569	3	6.20421
tDAPDLPEENQAR	16	P01031	N-Term(TMT10)	2.817e-05	54.67	0.000115835	2	1684.84	0.723737	0	1.13467	16	11.6933	1.0229	16	8.78619	1.05845	16	12.5429	0.969441	16	5.85739	0.893779	16	11.7331	0.978415	16	4.75531	1.20926	16	8.22324	0.975497	16	7.19467	0.930857	16	13.1499
aIEDYINEFSVR	13	A0A024R035	N-Term(TMT10)	2.082e-08	58.37	7.56839e-05	2	1684.88	1.02259	0	1.16037	13	3.07492	0.949036	13	2.26731	1.17361	13	4.88198	0.876527	13	6.13576	0.963967	13	6.88755	0.863575	13	5.96523	1.18066	13	6.8445	0.973949	13	3.14408	1.13009	13	4.9335
aLDFAVGEYNk	12	P01034	N-Term(TMT10); K11(TMT10)	8.151e-08	58.03	0.000139612	2	1684.93	0.424346	0	1.20037	12	6.99241	1.0299	12	3.00356	1.11392	12	4.78044	0.861114	12	6.36822	0.825911	12	5.35556	0.923923	12	5.10221	1.1961	12	2.3356	0.953526	12	4.44958	1.1408	12	7.22313
dTVQIHDITGk	23	A0A140VJJ6;D3DP16	N-Term(TMT10); K11(TMT10)	1.782e-07	73.6	4.0967e-06	2	1684.96	0.272698	0
aWGPGLEGGVVGk	1	P21333	N-Term(TMT10); K13(TMT10)	7.225e-06	25.84	0.21592	3	1684.98	0.354862	0	0.415048	1		1.00661	1		1.67012	1		0.851409	1		0.666556	1		1.29929	1		0.750615	1		0.609188	1		2.22966	1
qPVPGQQMTLk	5	P01024	N-Term(TMT10); K11(TMT10)	0.0005086	51.33	0.000614733	2	1684.98	0.29451	0	1.1447	5	6.0445	1.06484	5	3.05748	1.09931	5	6.69682	0.930486	5	2.31161	1.07618	5	3.55968	0.856052	5	3.73961	0.971803	5	6.94414	1.01967	5	8.28523	1.0076	5	15.1916
sPAGPTVVSIGGGk	1	P09172	N-Term(TMT10); K14(TMT10)	4.49e-05	27.57	0.106566	3	1685	-1.20381	0	0.900576	1		0.983387	1		1.07235	1		1.13728	1		0.931009	1		0.875316	1		1.07214	1		1.15437	1		0.896858	1
aPWcHTTNSQVR	7	P00747	N-Term(TMT10); C4(Carbamidomethyl)	2.459e-06	52.44	0.000164777	2	1685.84	1.6363	0	1.07734	7	8.61546	0.950459	7	13.2491	0.998183	7	11.7211	1.0454	7	7.0195	1.02326	7	17.3832	0.920233	7	14.0709	1.12965	7	9.88752	0.836901	7	23.3294	1.13436	7	14.5913
vGDDPAVWQLk	8	Q9Y490	N-Term(TMT10); K11(TMT10)	9.733e-07	47.04	0.00137894	2	1685.96	0.910872	0	0.762973	8	28.5779	1.01064	8	5.30083	0.9528	8	7.57586	1.06402	8	2.61448	0.854002	8	5.22772	1.0565	8	4.75118	0.996919	8	3.78268	1.02015	8	4.63614	1.26907	8	3.84034
hRPELIDYGk	7	P12814	N-Term(TMT10); K10(TMT10)	0.00308	23.58	0.294912	2	1685.97	-0.380255	0	0.530754	7	38.9096	0.996115	7	2.84591	1.0991	7	15.41	1.08784	7	4.92184	0.959987	7	8.66188	1.24288	7	5.59942	0.856795	7	8.08055	0.905971	7	3.69991	1.50633	7	14.4497
iPkPEASFSPR	5	B2RMS9	N-Term(TMT10); K3(TMT10)	0.007212	23.41	0.339976	2	1686.99	0.323265	0	1.31995	5	3.34826	1.00506	5	9.19551	1.21324	5	9.78816	0.752169	5	8.16781	1.11994	5	3.53304	0.892656	5	8.34311	1.13959	5	6.64096	0.704986	5	11.7435	1.30311	5	7.91389
eMEDTLNHLk	9	A6XND1	N-Term(TMT10); K10(TMT10)	1.276e-06	57.54	0.00010889	2	1687.91	0.432646	0	1.121	9	7.4123	0.954934	9	2.11896	0.966547	9	4.65084	0.959273	9	4.82432	0.953594	9	6.81917	1.02319	9	6.11261	0.962462	9	4.46746	1.09109	9	5.346	1.07107	9	2.52114
qTHQPPAPNSLIR	5	P02747	N-Term(TMT10)	0.0008773	33.06	0.037098	2	1687.95	2.36643	0	1.30677	5	11.1352	1.51915	5	4.54007	1.13303	5	2.21218	1.15714	5	3.59641	0.667867	5	41.318	0.881074	5	11.3334	0.758165	5	7.44373	0.922586	5	15.3242	0.441376	5	18.2921
eGESHAENETk	3	A8K2W3	N-Term(TMT10); K11(TMT10)	0.0002304	25.89	0.0999613	2	1688.85	0.044683	0	0.535096	3	34.9986	0.945216	3	9.46286	0.924259	3	1.1232	1.07786	3	3.59768	0.942725	3	14.911	1.15709	3	9.3446	1.06993	3	6.53395	0.971826	3	1.35169	1.27214	3	10.9996
iAYGTQGSSGYSLR	12	P03952	N-Term(TMT10)	3.497e-08	66.22	1.33956e-05	2	1688.89	5.63029	0	1.00627	12	5.12821	1.03421	12	5.99151	0.999013	12	6.91137	1.07327	12	11.0988	0.889314	12	11.3125	0.971173	12	8.10584	0.996506	12	5.20044	0.956898	12	6.78906	1.07439	12	9.71047
aHVVPcFDASk	5	P21333	N-Term(TMT10); C6(Carbamidomethyl); K11(TMT10)	1.351e-05	48.51	0.000865303	3	1688.92	0.710009	0	0.704426	5	18.2916	1.01562	5	2.77306	1.53133	5	3.25684	0.958068	5	10.3507	0.769966	5	21.809	1.1719	5	7.75189	0.902486	5	4.21403	0.681429	5	5.69685	1.5677	5	13.5003
nILTSNNIDVk	13	P05090	N-Term(TMT10); K11(TMT10)	1.392e-08	70.98	6.17249e-06	2	1689	0.603813	0	1.04919	13	5.77819	0.961343	13	7.89496	0.949517	13	7.42164	1.1837	13	7.64979	1.27481	13	6.22241	0.929405	13	11.7838	0.988844	13	8.85156	0.846752	13	8.35836	0.801875	13	14.9854
qGLLPVLESFk	6	P02647	N-Term(TMT10); K11(TMT10)	2.595e-06	49.61	0.000640511	3	1689.04	1.2737	0	0.540445	6	9.51439	0.547687	6	21.5102	0.593175	6	36.542	1.42043	6	4.37462	4.63546	6	12.7995	0.36411	5	34.5967	0.5186	6	14.9193	0.261816	5	23.2527	0.229068	5	23.9366
nADYSYSVWk	11	P01031	N-Term(TMT10); K10(TMT10)	2.273e-06	43.46	0.00215941	2	1690.88	0.412757	0	1.22711	11	4.08227	0.980511	11	5.95223	1.16585	11	3.86629	0.974499	11	2.2094	0.824741	11	5.30469	0.943412	11	3.80523	1.32981	11	5.70939	0.944077	11	7.41425	0.800025	11	7.35971
lSNRPAFMPSEGR	5	P12814	N-Term(TMT10)	0.0003523	32.33	0.030029	3	1690.89	-0.493331	0	0.623238	5	37.0752	0.959538	5	9.62331	1.07288	5	3.5591	1.13855	5	9.13527	1.20258	5	13.4996	1.25867	5	22.0528	0.818524	5	11.0276	1.07721	5	7.89379	0.933039	5	13.7887
vPGTSTSATLTGLTR	19	A0A024R462;B4DU16;B4DN21	N-Term(TMT10)	1.93e-08	87.59	1.43612e-07	2	1690.95	-1.42036	0
eQLEEEEEAk	1	P35579	N-Term(TMT10); K10(TMT10)	0.002118	28.31	0.0657427	3	1691.88	1.05345	0	0.903562	1		1.01913	1		1.53412	1		0.935203	1		0.710547	1		1.02048	1		1.06207	1		0.754174	1		1.41886	1
cLAYDFYPGk	22	P25311	N-Term(TMT10); C1(Carbamidomethyl); K10(TMT10)	1.678e-05	42.17	0.00313076	2	1691.89	0.86406	0	1.17449	22	6.68176	1.04492	22	4.65695	1.1137	22	8.56651	0.983185	22	2.60106	0.870587	22	6.29755	0.936375	22	5.6544	1.17672	22	4.69619	0.867748	22	6.00278	0.991846	22	10.2624
sLVELTPIAAVHGR	2	Q76LX8	N-Term(TMT10)	9.475e-07	52.71	0.000459446	3	1692	-2.34402	0	0.820378	2	3.85956	0.912674	2	11.4	0.93785	2	5.64439	1.46559	2	2.00496	0.896124	2	22.031	0.914609	2	8.70093	0.979424	2	4.54399	0.976574	2	25.7544	0.939354	2	2.90649
kSSTPEEVk	7	P23528	N-Term(TMT10); K1(TMT10); K9(TMT10)	0.0001339	27.58	0.151712	3	1692.02	0.706845	1	0.42154	7	21.266	1.11377	7	3.36478	0.852301	7	5.99396	1.11885	7	2.05013	0.797871	7	4.8998	1.29864	7	4.49591	0.928712	7	7.82328	0.964258	7	5.20967	1.51894	7	4.20785
aSPAFLASQNTk	4	B2R950;B7Z7M2	N-Term(TMT10); K12(TMT10)	5.16e-08	73.8	3.57049e-06	2	1692.97	0.87007	0
lAELPADALGPLQR	10	B0AZL7	N-Term(TMT10)	1.185e-05	72.81	4.54485e-06	3	1692.98	-1.05732	0	1.12511	9	10.9657	0.961443	8	2.45445	0.98711	9	18.1665	0.975513	9	5.74883	0.920721	9	7.38196	0.985693	9	20.6557	0.958301	9	9.71414	1.03084	9	7.13166	0.995344	9	14.5462
kGPGPGGPGGAGVAR	2	Q92686	N-Term(TMT10); K1(TMT10)	1.604e-08	60.36	7.90206e-05	3	1692.99	-0.284465	1	0.568207	2	25.2762	1.26726	2	7.67729	0.884359	2	7.79567	1.05448	2	5.45422	1.15748	2	2.41688	1.05973	2	4.23644	0.809546	2	27.0732	1.17256	2	20.8802	0.912358	2	5.91734
lkYENEVALR	7	P13645	N-Term(TMT10); K2(TMT10)	0.001825	31.92	0.04878	2	1693.01	1.37297	1	0.79034	7	4.25185	0.969137	7	7.15258	1.12996	7	5.30043	0.922151	7	4.5357	0.70223	7	22.0869	1.15684	7	4.5614	1.56665	7	8.81776	1.06054	7	4.27723	0.939543	7	5.18636
lEALPNSLLAPLGR	3	B0AZL7	N-Term(TMT10)	9.132e-09	52.2	0.000427817	2	1693.02	0.138529	0	1.01132	3	33.84	1.00948	3	6.98345	0.930769	3	12.5774	1.03537	3	11.2276	1.01036	3	6.43189	0.960195	3	10.4519	0.98262	3	2.50668	1.15021	3	15.5424	0.898003	3	13.2533
tLPPGLLTPTPk	5	L7UYB8	N-Term(TMT10); K12(TMT10)	7.321e-05	56.14	0.000128056	2	1693.07	0.0594301	0	0.94447	5	6.11389	0.967673	5	2.86383	1.05719	5	4.2081	0.990431	5	3.11029	1.0983	5	7.79487	0.96128	5	5.95949	0.974161	5	3.1712	1.1247	5	9.31937	0.916556	5	2.28275
mVNHFIAEFk	2	P11142	N-Term(TMT10); K10(TMT10)	5.348e-05	29.35	0.0939031	3	1693.95	1.17785	0	0.597365	2	2.93716	0.926106	2	2.12358	1.02341	2	0.15391	1.02947	2	2.03876	0.984654	2	22.0651	1.05772	2	10.9504	0.953566	2	5.34585	1.22133	2	6.92612	1.26453	2	5.46228
lVHcPIETQVLR	4	Q99969	N-Term(TMT10); C4(Carbamidomethyl)	3.25e-05	36.49	0.0534044	3	1693.96	0.212656	0	1.10544	4	9.50598	0.984282	4	12.6217	1.00789	4	6.79987	0.933635	4	12.1055	1.23438	4	6.3564	0.912544	4	3.48323	1.02931	4	4.21468	0.908317	4	9.50702	0.980418	4	9.51311
vMLVNSMNTVk	2	A0A024QZN4;B4E3Q9	N-Term(TMT10); K11(TMT10)	1.874e-08	76.1	5.86184e-06	2	1693.98	1.05707	0
lLPHANEVSQk	31	P06727	N-Term(TMT10); K11(TMT10)	3.006e-07	63.97	9.3422e-05	2	1694	0.78934	0	1.19615	31	10.5885	0.979514	31	11.2862	1.08735	31	10.2463	0.86397	31	10.2284	0.936612	31	10.4012	0.994502	31	8.26044	1.21229	31	7.05518	0.799383	31	12.2036	1.08047	31	7.2062
dLATVYVDVLk	11	P02647	N-Term(TMT10); K11(TMT10)	6.142e-08	74.95	7.29188e-06	2	1694.01	-0.510095	0	0.646573	11	20.1888	0.504833	11	10.6983	0.556708	11	28.1712	1.33556	11	5.7017	4.35849	11	19.223	0.416384	11	28.4271	0.578797	11	23.6342	0.34129	10	84.942	0.355397	10	53.7336
kEMQPTHPIR	1	P31946;P27348;P63104	N-Term(TMT10); K1(TMT10)	0.002143	25.62	0.21631	4	1694.98	0.435971	1
fEIENcLANk	13	B2R950	N-Term(TMT10); C6(Carbamidomethyl); K10(TMT10)	2.034e-07	60.42	5.45146e-05	2	1695.91	-1.05563	0	1.21672	13	5.47589	0.948553	13	5.19275	1.04283	13	3.9537	1.19529	13	9.1951	1.27542	13	8.90148	0.833773	13	9.61722	0.897388	13	8.46809	0.968645	13	6.49793	0.606533	13	25.803
qHGPNVcAVQk	5	Q15582	N-Term(TMT10); C7(Carbamidomethyl); K11(TMT10)	3.875e-05	40.29	0.00673492	3	1695.94	2.49992	0	1.04389	5	7.98828	0.859621	5	21.4884	0.947796	5	2.57565	0.976796	5	8.05958	1.03838	5	9.47926	0.962645	5	4.39798	1.08511	5	21.1536	1.04314	5	7.43138	1.00166	5	12.1854
rPcLHVPAck	1	P27918	N-Term(TMT10); C3(Carbamidomethyl); C9(Carbamidomethyl); K10(TMT10)	0.0008206	22.66	0.403791	3	1695.95	-0.71387	0	0.897481	1		0.795612	1		0.867458	1		0.741874	1		1.69684	1		1.01329	1		0.914986	1		1.22685	1		1.01239	1
eTLFSVmPGLk	10	B2RMS9;B7ZKJ8;B7Z544	N-Term(TMT10); M7(Oxidation); K11(TMT10)	4.934e-05	55.26	0.000225772	2	1695.98	1.30338	0
hLIPAANTGESk	4	P62258	N-Term(TMT10); K12(TMT10)	9.708e-06	48.02	0.00116349	3	1695.98	0.191736	0	0.693851	4	8.92278	0.986382	4	5.45674	0.995509	4	3.7099	1.05773	4	3.89395	0.946006	4	15.1246	1.09612	4	8.41247	1.09281	4	7.11737	1.02018	4	7.06752	1.21956	4	4.11493
yEGLQEWEGk	10	C0JYY2;Q59HB3	N-Term(TMT10); K10(TMT10)	3.294e-06	51.68	0.000372883	2	1696.9	0.644855	0
yLSYTLNPDLIR	1	P15144	N-Term(TMT10)	1.542e-05	41.57	0.00562526	2	1696.95	-0.493026	0	0.975242	1		1.05101	1		0.865605	1		0.922194	1		1.11479	1		0.907101	1		1.338	1		1.17321	1		0.757316	1
sEILAHWSPAk	4	C0JYY2	N-Term(TMT10); K11(TMT10)	5.658e-07	61.28	5.74933e-05	2	1696.98	3.65093	0	1.17419	4	10.4267	0.917036	4	2.79609	0.98316	4	0.928226	1.10453	4	6.51731	0.964843	4	9.69705	1.08784	4	10.2702	1.09768	4	2.59668	0.675314	4	14.235	0.93261	4	6.70027
rHPDYSVVLLLR	7	P02768;F6KPG5	N-Term(TMT10)	1.405e-07	53.66	0.000266926	3	1697	-0.951451	1
sSGLPNIPVQTISR	2	G3V0E5	N-Term(TMT10)	7.472e-05	50.79	0.000688621	2	1697.98	2.99927	0	0.749444	2	23.0065	0.884067	2	21.1146	0.773089	2	19.9971	0.926275	2	13.3618	1.12043	2	43.5819	1.01359	2	8.97585	1.10945	2	7.54267	1.31307	2	15.2773	1.0964	2	6.37513
vVAEVQIcHGk	2	Q9Y6R7	N-Term(TMT10); C8(Carbamidomethyl); K11(TMT10)	9.438e-06	37.56	0.0136364	3	1697.97	-1.44386	0	1.13626	2	9.9083	0.875639	2	0.399146	0.997849	2	6.13865	1.0698	2	17.8752	1.35852	2	27.5784	0.851478	2	5.70884	1.04697	2	24.5587	0.920343	2	13.6558	0.784262	2	11.2399
aLEQDLPVNIk	17	A8K1K1	N-Term(TMT10); K11(TMT10)	8.75e-08	72.52	3.21301e-06	2	1698.02	0.75186	0	1.13257	17	2.23808	0.894394	17	2.90153	0.973346	17	8.05252	1.03802	17	4.25172	0.917286	17	5.42423	0.985106	17	5.83332	0.872898	17	5.50113	1.1584	17	7.64809	1.09064	17	7.82554
eDEDFQESNk	3	P00450	N-Term(TMT10); K10(TMT10)	0.001021	31.98	0.0175582	2	1698.82	-0.372274	0	1.1795	3	8.26378	0.849611	3	1.64956	0.96105	3	7.69424	0.982693	3	8.84433	1.009	3	2.54288	0.961512	3	2.56668	0.970711	3	11.7826	1.07678	3	12.4388	0.925507	3	19.7019
iLAGPAGDSNVVk	6	P04275;L8E853	N-Term(TMT10); K13(TMT10)	3.83e-10	84.01	2.32357e-07	2	1699.01	-0.76959	0
sHkPLNMGk	16	P0C0L4;P0C0L5;A0A0G2JPR0	N-Term(TMT10); K3(TMT10); K9(TMT10)	7.251e-05	38.17	0.00717067	2	1699.03	1.4164	0
tEDSSSFLIDk	27	P05543	N-Term(TMT10); K11(TMT10)	2.144e-07	65.99	1.59872e-05	2	1699.92	0.256397	0	1.09301	27	3.44739	1.0122	27	4.19172	0.873927	27	6.42074	0.891593	27	2.98423	0.935796	27	6.60257	1.02359	27	5.27266	1.22626	27	4.97074	1.02483	27	3.94506	1.03031	27	6.89501
lSLEIEQLELQR	25	B4E1D8;P04003	N-Term(TMT10)	3.91e-09	69.91	7.36097e-06	2	1699.98	-0.250553	0
aAVYHHFISDGVR	2	P01024	N-Term(TMT10)	4.904e-05	34.28	0.025213	4	1700.91	-0.890711	0	1.09417	2	17.3985	1.07059	2	1.03066	1.12256	2	13.4539	0.96694	2	8.45982	1.03984	2	9.9673	0.817354	2	5.69635	1.14246	2	2.39738	0.936246	2	0.739001	0.981092	2	8.89682
aTGVLYDYVNk	38	C0JYY2;Q59HB3	N-Term(TMT10); K11(TMT10)	8.754e-08	68.01	1.29662e-05	2	1700.96	1.19213	0
kDEILGIANNR	6	Q86UX7	N-Term(TMT10); K1(TMT10)	0.002703	38.48	0.0094793	2	1701.02	6.68793	1	0.571281	6	8.06727	1.10305	6	3.89064	0.906728	6	4.8541	1.07259	6	1.15658	0.866565	6	8.28821	1.24815	6	7.76917	0.904201	6	3.48676	1.09278	6	7.3542	1.24496	6	3.97506
vkDISEVVTPR	17	B4E1Z4;H7C5H1	N-Term(TMT10); K2(TMT10)	5.138e-06	42.17	0.00373143	2	1701.03	-0.275158	1
aDLINNLGTIAk	3	P07900;B4DMA2	N-Term(TMT10); K12(TMT10)	2.613e-08	75.71	1.62329e-06	2	1701.04	2.73886	0
ySYVcPDLVk	6	B4DXW1	N-Term(TMT10); C5(Carbamidomethyl); K10(TMT10)	0.001295	49.89	0.000651289	2	1701.93	1.15903	0	0.673366	6	36.5496	0.954905	6	6.27816	0.998067	6	3.75689	1.11676	6	2.12042	0.855951	6	9.17588	1.20888	6	3.10919	0.936056	6	5.89805	1.06534	6	2.5215	1.17023	6	15.5856
vLVQNAAGSQEk	10	Q9Y490	N-Term(TMT10); K12(TMT10)	9.231e-10	72.72	4.04933e-06	2	1701.99	0.73046	0	0.597497	10	33.4766	1.05156	10	4.66108	1.09079	10	4.78993	1.13954	10	5.2059	0.93595	10	15.7007	1.08362	10	10.3002	0.882172	10	10.6935	0.932454	10	5.75535	1.37266	10	14.326
iLLDEQAQWk	6	J3QQX6	N-Term(TMT10); K10(TMT10)	2.315e-06	60.3	7.15339e-05	2	1702	3.10216	0	1.10984	6	2.93281	0.986127	6	6.2244	1.00799	6	9.93289	0.948202	6	3.5875	0.939394	6	5.04797	1.01475	6	4.09581	1.17338	6	4.73504	1.1048	6	4.80253	0.835558	5	9.9131
iDDIWNLEVk	43	C0JYY2;Q59HB3	N-Term(TMT10); K10(TMT10)	2.58e-06	62.9	4.62088e-05	2	1702.98	2.16194	0
vWSPLVTEEGk	5	O00151	N-Term(TMT10); K11(TMT10)	8.801e-08	61.02	7.05681e-05	2	1702.98	-0.776952	0	0.686333	5	19.2212	0.976122	5	3.90692	0.949899	5	4.91051	1.08012	5	3.14939	0.966157	5	6.95761	1.24654	5	6.92272	0.943628	5	3.86357	1.05873	5	0.785859	1.17466	5	4.15718
aVETLLDLIMk	1	O00194	N-Term(TMT10); K11(TMT10)	6.536e-06	32.05	0.042913	2	1704.04	0.949051	0	0.610204	1		1.06368	1		1.4909	1		1.07403	1		0.726982	1		1.26697	1		0.806686	1		0.897919	1		1.19611	1
sWITPcPEEk	12	P80108	N-Term(TMT10); C6(Carbamidomethyl); K10(TMT10)	6.968e-05	50.64	0.000514335	2	1704.91	1.69168	0	1.16831	12	4.29444	0.907585	12	3.8577	0.917668	12	5.42741	1.08115	12	7.06781	0.791612	12	13.3329	0.957632	12	3.75089	1.08724	12	5.20877	1.0559	12	7.15998	1.10885	12	3.12073
wELLQQVDTSTR	10	H6VRF8	N-Term(TMT10)	1.977e-05	51.98	0.00038159	3	1704.91	0.731292	0	0.953674	10	9.95139	1.06936	10	6.64185	0.947805	10	8.23072	0.883727	10	7.13033	0.763733	10	6.47972	1.13483	10	5.76962	1.20592	10	7.7795	1.14609	10	5.77906	0.895793	10	10.4969
iGESIELTcPk	34	P13671;A8K8Z4	N-Term(TMT10); C9(Carbamidomethyl); K11(TMT10)	7.704e-08	59.21	0.000100038	2	1704.96	0.316687	0
aGVETTkPSk	22	Q6PIK1;Q6GMW4;Q5CZ94	N-Term(TMT10); K7(TMT10); K10(TMT10)	3.433e-05	47.4	0.00178695	2	1705.05	0.265816	0
vTADGEQTGQDAER	1	Q59H37	N-Term(TMT10)	7.323e-06	55.66	0.000423765	2	1705.82	2.44837	0	1.35863	1		0.920351	1		0.743511	1		1.30523	1		0.848449	1		0.789957	1		1.2167	1		0.865648	1		0.954403	1
lGMFNIQHck	2	P01009	N-Term(TMT10); C9(Carbamidomethyl); K10(TMT10)	4.505e-05	44.86	0.00278253	2	1705.93	0.495593	0	0.357714	2	104.981	0.285643	2	119.323	0.31836	2	97.7598	0.691653	2	22.8107	5.20084	2	40.3792	0.300654	2	82.0042	0.889274	2	8.37478	0.335435	2	144.378	0.509603	2	29.0482
dLVFSTWDHk	1	A8K061	N-Term(TMT10); K10(TMT10)	0.000477	30.47	0.077134	3	1705.93	-0.891327	0	1.36178	1		0.924017	1		1.14814	1		1.06954	1		1.06865	1		0.872758	1		1.07196	1		0.662124	1		1.03904	1
lLAVAATAPPDAPNR	5	A0A024QZN4;B4E3Q9	N-Term(TMT10)	2.594e-06	48.03	0.00128516	2	1705.98	-0.439469	0
kITIADcGQLE	5	A8K486	N-Term(TMT10); K1(TMT10); C7(Carbamidomethyl)	0.002033	37.39	0.0138981	2	1705.95	-0.834681	1	0.654763	5	4.42865	1.02131	5	1.28508	0.978753	5	8.37679	1.09707	5	4.74292	0.917019	5	10.8267	1.2017	5	10.2417	1.0035	5	0.980016	1.02418	5	2.54241	1.20441	5	1.51986
aLDVMVSTFHk	1	P26447	N-Term(TMT10); K11(TMT10)	0.0001642	18.43	1.1893	3	1705.97	1.98549	0	0.78243	1		1.07171	1		0.993661	1		1.13143	1		1.01285	1		1.0548	1		0.963133	1		0.886375	1		1.17268	1
dkcEPLEk	17	P02763;P19652	N-Term(TMT10); K2(TMT10); C3(Carbamidomethyl); K8(TMT10)	0.003441	25.82	0.215738	2	1705.98	0.0132404	1
ySLEPVAVELk	3	P00558	N-Term(TMT10); K11(TMT10)	4.219e-07	54.65	0.000258276	3	1706.02	0.666235	0	0.595126	3	15.9763	0.985269	3	1.14221	0.93808	3	0.637916	1.11117	3	7.40325	0.979691	3	5.9818	1.11371	3	5.36939	0.936749	3	0.51725	1.04353	3	7.06543	1.36693	3	1.28769
mYLGYEYVTAIR	19	Q53H26;B4E1B2	N-Term(TMT10)	7.723e-06	61.77	3.68561e-05	3	1707.9	0.188619	0
lHSLHLEGScLGR	8	B0AZL7	N-Term(TMT10); C10(Carbamidomethyl)	1.127e-07	55.21	0.000187108	2	1707.91	-1.25135	0	1.28028	8	7.92493	1.0378	8	9.5465	1.00176	8	3.73134	0.989212	8	5.49331	0.954776	8	9.73544	0.975392	8	6.58089	1.12381	8	10.098	0.702349	8	15.62	1.10223	8	18.8564
sASDLTWDNLk	47	Q53H26;B4E1B2	N-Term(TMT10); K11(TMT10)	2.398e-08	61.72	4.54932e-05	2	1707.93	0.134159	0
gTWTQPFDLASTR	9	B2R9F2	N-Term(TMT10)	3.778e-06	54.09	0.000216418	2	1708.89	2.28843	0	1.13953	9	7.2211	1.00821	9	3.6069	1.05051	9	3.67362	1.0431	9	3.97022	1.11611	9	8.96819	0.874328	9	8.61206	1.05028	9	4.23221	0.995751	9	4.31348	0.84406	9	9.76893
lGNWSAMPSck	2	D9IWP9	N-Term(TMT10); C10(Carbamidomethyl); K11(TMT10)	2.007e-06	59.78	6.31703e-05	2	1708.9	3.90407	0	1.26446	2	5.56341	0.948825	2	15.5672	0.953714	2	4.21109	1.02043	2	8.49175	0.946068	2	15.4443	0.886868	2	8.33508	1.06752	2	7.08243	1.21084	2	15.2401	0.686023	2	15.223
sFYFPmSIDk	1	P05160	N-Term(TMT10); M6(Oxidation); K10(TMT10)	0.00271	27.37	0.11397	2	1708.91	1.95611	0	1.05497	1		0.985875	1		1.06615	1		0.895976	1		0.910692	1		0.82689	1		0.963156	1		0.896245	1		1.71177	1
dTDTGALLFIGk	15	P36955	N-Term(TMT10); K12(TMT10)	8.267e-09	65.96	2.00909e-05	2	1708.99	1.2551	0	1.21788	15	5.87473	1.02517	15	5.76511	1.16145	15	3.90759	0.899231	15	5.44424	0.809976	15	7.60366	0.941939	15	4.1287	1.07262	15	8.97477	1.04588	15	5.54977	1.00799	15	9.76077
aVISPGFDVFAk	3	B4E1Z4;A0A1U9X8W4	N-Term(TMT10); K12(TMT10)	3.344e-06	71.15	6.18493e-06	2	1709	0.325821	0
kLEAMTNSk	6	A0A024QZN4;B4E3Q9	N-Term(TMT10); K1(TMT10); K9(TMT10)	1.035e-05	32.46	0.0426794	3	1709.02	0.407703	1
kMLEEIMk	2	A0A140VJJ6;D3DP16	N-Term(TMT10); K1(TMT10); K8(TMT10)	0.0006309	19.59	0.78469	3	1709.03	-0.821032	1
tVGSDTFYSFk	41	B4E1C2;B4DPP8	N-Term(TMT10); K11(TMT10)	9.819e-07	66.52	1.38943e-05	2	1709.92	0.780234	0
vmLVNSMNTVk	1	A0A024QZN4;B4E3Q9	N-Term(TMT10); M2(Oxidation); K11(TMT10)	0.0009092	14.05	2.73911	2	1709.97	1.26702	0
iVAcASYkPSR	7	P01031	N-Term(TMT10); C4(Carbamidomethyl); K8(TMT10)	3.31e-05	29.21	0.0881032	2	1709.97	-1.77695	0	1.22024	7	8.45063	0.960512	7	13.5005	1.13527	7	8.75953	0.959309	7	2.62177	0.873838	7	6.6815	0.833433	7	7.57375	1.21291	7	1.83763	0.964604	7	14.111	1.03827	7	11.6852
eTAASLLQAGYk	42	P00734	N-Term(TMT10); K12(TMT10)	8.553e-10	73.61	3.00068e-06	2	1709.98	0.545917	0	1.16201	42	4.70504	0.928518	42	4.30682	0.985638	42	9.30881	1.06721	42	4.38361	0.834576	42	9.32408	0.898415	42	6.66011	1.00532	42	5.90599	1.06112	42	5.82627	1.05938	42	10.0827
mFTTAPDQVDk	2	P00450	N-Term(TMT10); K11(TMT10)	9.432e-05	30.2	0.0615493	2	1710.91	0.641306	0	1.1022	2	1.86455	0.941026	2	4.02519	0.935482	2	11.7812	0.860387	2	23.4051	1.06323	2	15.717	0.982118	2	1.05341	0.901745	2	8.98487	1.21156	2	8.7243	1.06208	2	30.8135
vQPYLDDFQk	23	P02647	N-Term(TMT10); K10(TMT10)	2.406e-05	51.23	0.00057707	2	1710.95	0.908552	0	0.552004	23	15.7301	0.525146	23	17.1927	0.476776	23	13.128	1.33764	23	9.28757	4.53046	23	11.6595	0.391587	23	40.1519	0.534315	23	22.6648	0.313754	23	72.4625	0.261458	23	62.431
tLLPVSkPEIR	11	P01031	N-Term(TMT10); K7(TMT10)	6.213e-05	28.49	0.0413412	2	1711.09	-0.62504	0	1.18914	11	4.12273	1.02182	11	8.38968	1.08673	11	5.86055	0.980077	11	3.65286	0.819349	11	8.52786	0.894637	11	5.41079	1.21595	11	6.37377	0.920473	11	11.7175	0.960473	11	8.84815
gEWTcIAYSQLR	9	A0A024R462	N-Term(TMT10); C5(Carbamidomethyl)	1.398e-07	51.21	0.000305382	2	1712.86	1.15969	0	1.05195	9	6.77836	0.916787	9	6.41825	1.02515	9	4.83829	0.919793	9	9.02903	0.991131	9	20.1352	1.12631	9	3.16791	1.28835	9	13.5243	1.0093	9	22.568	0.758852	9	12.8381
fFLcQVAGDAk	4	H7BYX6	N-Term(TMT10); C4(Carbamidomethyl); K11(TMT10)	5.283e-08	57.97	9.77476e-05	2	1713.94	1.548	0	1.17613	4	6.04009	0.966523	4	4.04723	0.950918	4	2.78665	1.00596	4	4.97222	0.920389	4	3.95672	0.960919	4	8.67555	1.08692	4	4.97036	1.07218	4	3.49471	0.878485	4	2.62472
vDQLTAQLADLAAR	5	A0A024QZN4;B4E3Q9	N-Term(TMT10)	5.631e-09	64.54	2.46795e-05	2	1713.97	1.58486	0
kVYLSEck	7	P00747	N-Term(TMT10); K1(TMT10); C7(Carbamidomethyl); K8(TMT10)	0.0001951	32.27	0.0372654	3	1714.02	0.642143	1	0.915816	7	2.24195	1.10018	7	1.87175	1.06659	7	3.30557	0.973484	7	3.94455	0.697853	7	5.437	1.10201	7	3.93171	1.15451	7	5.1856	1.04296	7	6.60128	1.19302	7	6.52437
aVQPGETYTYk	9	P12259	N-Term(TMT10); K11(TMT10)	2.881e-05	62.39	4.48436e-05	2	1714.94	0.392457	0	1.07362	9	2.50982	0.891321	9	4.36892	0.960766	9	2.30617	0.953342	9	4.89293	0.869512	9	7.40013	0.997886	9	6.18511	1.2747	9	7.96036	1.10437	9	6.62471	1.11144	9	9.60895
gLPDNISSVLNk	1	Q53QE9	N-Term(TMT10); K12(TMT10)	0.005429	23.74	0.272621	3	1715.01	0.0325736	0	0.96576	1		0.912167	1		0.943186	1		1.01509	1		1.01871	1		1.06005	1		1.0458	1		1.04403	1		1.09723	1
sHkPLNmGk	3	P0C0L4;P0C0L5;A0A0G2JPR0	N-Term(TMT10); K3(TMT10); M7(Oxidation); K9(TMT10)	0.005797	22.71	0.334873	4	1715.03	0.86481	0
kHNLGHGHk	15	B4E1C2	N-Term(TMT10); K1(TMT10); K9(TMT10)	8.735e-05	34.36	0.0205388	2	1715.05	1.57356	1	1.17677	15	4.07139	1.13672	15	8.49141	0.886083	15	6.82588	0.442785	15	15.0429	1.02638	15	5.36668	1.00927	15	3.29418	1.19832	15	4.63323	1.16241	15	3.26578	1.2821	15	4.86635
sAGSVESPSVSSTHR	2	A6XND1	N-Term(TMT10)	9.11e-07	52.41	0.000264381	3	1716.87	0.160148	0	1.04559	2	21.801	1.12674	2	2.7046	0.821004	2	21.5352	0.985277	2	11.6206	1.12619	2	8.49997	1.02998	2	18.994	1.07745	2	11.1802	0.879079	2	9.96537	0.965543	2	1.16911
dVSSSVYSTWk	1	A0A0U2N547	N-Term(TMT10); K11(TMT10)	0.005582	14.28	3.11104	2	1716.93	3.86302	0	1.13177	1		1.07593	1		0.978867	1		1.01934	1		0.973763	1		0.935782	1		1.01049	1		1.02649	1		0.913346	1
eMSGSPASGIPVk	42	P0C0L4;P0C0L5;A0A0G2JPR0	N-Term(TMT10); K13(TMT10)	5.347e-10	74.65	2.43194e-06	2	1717.95	-3.25406	0
aHLDIAGSLEGHLR	43	C0JYY2;Q59HB3	N-Term(TMT10)	1.895e-07	63.44	3.43976e-05	4	1717.96	0.698518	0
wQSIPLcVEk	14	P08603;A8K5T0	N-Term(TMT10); C7(Carbamidomethyl); K10(TMT10)	0.0002127	40.85	0.00665194	3	1717.97	-1.64869	0
sENINHNSAFk	14	P13671;A8K8Z4	N-Term(TMT10); K11(TMT10)	6.424e-08	61.36	4.82186e-05	2	1718.93	2.77526	0
aQWANPFDPSk	8	P05543	N-Term(TMT10); K11(TMT10)	2.757e-05	49.45	0.000801885	2	1718.93	0.92206	0	1.04689	8	3.17324	0.994668	8	6.06566	0.91644	8	14.1019	0.864686	8	7.27799	0.932565	8	9.33828	1.05383	8	2.26498	1.24645	8	6.08919	1.15866	8	9.29145	0.9933	8	13.4878
fTVNNLAEPQk	5	P12259;Q15430	N-Term(TMT10); K11(TMT10)	1.766e-06	46.94	0.00187736	2	1718.99	2.33363	0
gkYEMYLk	5	Q06033	N-Term(TMT10); K2(TMT10); K8(TMT10)	0.0002132	41.07	0.00634291	2	1719.02	2.4325	1	1.01366	5	4.42869	0.887521	5	1.72722	1.31755	5	4.87309	0.953856	5	9.61628	0.930505	5	6.80579	0.846868	5	5.12306	1.26603	5	5.50432	1.03055	5	3.12217	1.0864	5	7.93875
gGEGTGYFVDFSVR	94	P04196;B2R8I2	N-Term(TMT10)	4.091e-10	91.11	2.0136e-08	2	1719.85	-0.131369	0
lVNHFVEEFk	1	A0A1U9X7W4	N-Term(TMT10); K10(TMT10)	0.001004	23.74	0.321017	3	1719.98	0.726186	0	0.658249	1		1.0275	1		1.00074	1		1.06375	1		0.915647	1		1.16463	1		1.02604	1		0.965313	1		1.28544	1
lDVPQNLMFGk	2	B3KNN9	N-Term(TMT10); K11(TMT10)	7.394e-07	51.71	0.000520736	2	1719.99	3.34072	0	1.04314	2	2.97865	0.977459	2	9.50169	0.953688	2	6.59408	0.965368	2	2.75953	0.946522	2	3.60914	0.921165	2	19.0147	1.11508	2	1.71087	1.33157	2	14.7509	0.73859	2	24.9471
lTVSSLQESGLk	4	P21333	N-Term(TMT10); K12(TMT10)	5.175e-09	74.51	2.701e-06	2	1720.03	4.44613	0	0.521215	4	30.751	1.01341	4	2.53702	1.57736	4	1.84771	0.883261	4	3.61819	0.741637	4	15.6388	1.28982	4	11.8226	0.767171	4	6.39613	0.702354	4	9.9141	1.84194	4	12.0047
dLFHcVSFTLPR	1	B2R950	N-Term(TMT10); C5(Carbamidomethyl)	0.001549	8.27	8.35532	3	1720.9	-1.39327	0	0.958784	1		1.03977	1		1.23749	1		1.01758	1		1.16948	1		0.829323	1		1.06865	1		0.990894	1		0.827191	1
dGWSAQPTcIk	42	P08603;A8K5T0	N-Term(TMT10); C9(Carbamidomethyl); K11(TMT10)	3.178e-05	56.76	0.000127256	2	1720.91	-0.266269	0
yEASILTHDSSIR	15	A0A140VJJ6;D3DP16	N-Term(TMT10)	4.793e-08	61.63	4.16363e-05	2	1720.91	1.92252	0
gLGELQELYLk	6	L7UYB8	N-Term(TMT10); K11(TMT10)	8.67e-08	59.3	8.61787e-05	2	1721.02	-1.30308	0	0.951664	6	6.12353	0.834432	6	4.42883	1.02234	6	1.67121	1.02395	6	4.0553	0.964932	6	8.89279	1.0491	6	9.01065	1.05615	6	3.27191	1.12453	6	2.68234	1.08384	6	3.19584
tDcPGDALFDLLR	19	Q96PD5	N-Term(TMT10); C3(Carbamidomethyl)	2.497e-06	68.67	6.11241e-06	2	1721.87	0.72472	0	1.06782	19	12.5512	0.977819	19	7.37653	0.895697	19	11.4382	0.991575	19	7.29081	0.828201	19	11.7708	1.01591	19	8.12639	1.28298	19	8.98729	1.0198	19	8.85594	1.04481	19	10.1994
lGmFNIQHck	3	P01009	N-Term(TMT10); M3(Oxidation); C9(Carbamidomethyl); K10(TMT10)	0.000426	28.36	0.0995641	3	1721.92	0.0334659	0	0.785263	3	12.9175	0.703046	3	5.83665	0.754514	3	53.2226	0.817088	3	4.29411	3.8436	3	2.82921	0.532695	3	7.01177	0.927181	3	1.45239	0.606748	3	38.2859	0.612327	3	2.59165
gNPEPTFSWTk	3	A0A087X0M8;B3KX75	N-Term(TMT10); K11(TMT10)	7.573e-07	45.33	0.0019974	2	1721.92	-2.07222	0
iYSLWEHSTk	2	C0JYY2;Q59HB3	N-Term(TMT10); K10(TMT10)	0.0002654	29.3	0.0917008	3	1721.96	1.11992	0
sGLSTGWTQLSk	18	P04217	N-Term(TMT10); K12(TMT10)	8.447e-09	79.39	8.84965e-07	2	1722.98	0.889806	0	1.0464	18	5.38924	0.955559	18	8.77595	0.995094	18	9.19687	0.98602	18	5.55135	0.876283	18	9.19657	1.01532	18	6.08241	1.2011	18	9.19238	1.02888	18	5.48182	1.0186	18	11.3902
tNLESILSYPk	23	P05155	N-Term(TMT10); K11(TMT10)	2.236e-06	51.4	0.000585344	2	1723	-2.22373	0	1.21634	23	6.191	1.12256	23	4.40118	1.16765	23	6.02171	0.946224	23	4.29953	0.992172	23	7.25653	0.874266	23	7.30999	1.06475	23	6.05849	0.887828	23	6.54777	0.92103	23	8.94248
gDMFLVANLGTk	2	P43251	N-Term(TMT10); K12(TMT10)	9.385e-07	46.02	0.00224156	2	1723.98	0.190236	0	1.08681	2	1.0014	0.818008	2	0.462431	0.919585	2	3.66245	1.11641	2	6.60884	0.835027	2	2.57193	0.950992	2	7.90453	1.09206	2	0.24884	1.23994	2	4.76958	0.944416	2	4.0017
yYcFQGNQFLR	32	P02790	N-Term(TMT10); C3(Carbamidomethyl)	6.822e-05	40.01	0.00222986	3	1724.84	-0.465455	0	1.20631	32	6.17396	1.10313	32	7.35912	1.14018	32	8.97474	0.965822	32	6.08771	0.8738	32	11.8451	0.886264	32	7.88629	1.27994	32	11.4448	1.15756	32	5.91452	0.408615	31	46.8519
mVVESAYEVIk	8	P07195	N-Term(TMT10); K11(TMT10)	1.292e-08	74.02	3.12465e-06	2	1725.99	0.752645	0	0.713473	8	14.2887	1.02715	8	4.24473	0.973099	8	5.62799	1.18952	8	3.07421	0.833533	8	8.00751	1.16276	8	2.32875	0.985609	8	3.57584	1.08384	8	1.28127	0.963097	8	8.31039
eQTmSEcEAGALR	6	P10643;B2R6W1	N-Term(TMT10); M4(Oxidation); C7(Carbamidomethyl)	1.711e-05	58.79	1.15613e-05	2	1726.79	-0.613908	0
aATVGSLAGQPLQER	23	P02649	N-Term(TMT10)	1.401e-08	61.65	4.75319e-05	2	1726.97	0.789183	0	1.00033	23	9.02695	0.84208	23	16.1427	0.92302	23	12.557	1.02365	23	6.61082	0.937831	23	13.1266	1.06164	23	8.29697	1.04789	23	9.93298	0.994486	23	13.0421	1.27622	23	9.76075
aTAQMLEVMFk	3	Q8TCF0	N-Term(TMT10); K11(TMT10)	6.86e-06	43.14	0.00342371	2	1726.98	9.18047	0	1.38538	3	3.07614	1.01749	3	2.42488	1.24401	3	0.709639	0.718406	3	10.9009	0.906904	3	4.2287	0.746843	3	2.29482	1.2047	3	2.00068	1.16134	3	7.63191	1.0171	3	0.460752
gNNVEkPLELR	3	Q14126	N-Term(TMT10); K6(TMT10)	0.00166	11.24	4.81414	3	1727.03	3.06617	0	1.05943	3	0.231691	0.923157	3	18.6842	1.00807	3	2.31601	0.941887	3	0.980077	1.12831	3	29.7166	0.944548	3	8.03255	1.13271	3	1.31594	0.941587	3	6.39907	1.101	3	2.51091
aLQDQLVLVAAk	59	Q53GY3	N-Term(TMT10); K12(TMT10)	5.97e-07	80.65	2.66908e-07	2	1727.09	1.54464	0	1.10788	59	7.56422	0.897599	59	9.96176	0.96595	59	9.85363	1.00205	59	5.28405	0.900126	59	11.0026	0.940462	59	6.20113	1.15075	59	11.1123	1.03313	59	9.38347	1.08353	59	14.7911
aVAGNISDPGLQk	12	A0A024QZN4;B4E3Q9	N-Term(TMT10); K13(TMT10)	7.336e-10	85.04	2.0288e-07	2	1728.01	-0.219142	0
sTLMDTLFNTk	1	D6RDU5	N-Term(TMT10); K11(TMT10)	0.001536	13.6	2.95303	2	1728.96	1.02064	0	0.794341	1		1.2202	1		0.90147	1		1.13595	1		0.912152	1		1.12809	1		0.935575	1		0.999136	1		0.923219	1
sVSLPSLDPASAk	44	C0JYY2;Q7Z7Q0	N-Term(TMT10); K13(TMT10)	4.597e-08	70.97	6.30669e-06	2	1730.01	0.760017	0
mELERPGGNEITR	21	P02671	N-Term(TMT10)	0.0003881	41.73	0.00374993	2	1730.91	3.40595	0	1.21275	21	8.59696	1.00325	21	6.83321	1.23117	21	11.6247	0.961736	21	9.92862	1.25877	21	10.278	0.749826	21	12.1282	1.08612	21	4.62199	0.856591	21	8.40823	0.801271	21	9.80147
aLNSIIDVYHk	5	P05109	N-Term(TMT10); K11(TMT10)	2.695e-07	68.01	1.1891e-05	3	1731.02	-3.01056	0	0.703306	5	19.3545	1.23064	5	4.64841	1.44471	5	6.55293	1.03024	5	7.97209	1.21169	5	3.64911	0.956308	5	5.59319	0.942864	5	0.584604	0.755521	5	16.9293	1.017	5	4.41477
fTcAcPDQFk	13	Q14520	N-Term(TMT10); C3(Carbamidomethyl); C5(Carbamidomethyl); K10(TMT10)	2.953e-05	46.29	0.000648499	2	1731.86	-0.430082	0	1.15671	13	7.76012	0.891261	13	4.79854	1.04266	13	7.06985	1.07495	13	2.50978	0.977857	13	15.5982	0.892296	13	9.205	0.997155	13	4.48903	0.939936	13	9.57522	1.10195	13	6.13489
vcPFAGILENGAVR	4	D9IWP9	N-Term(TMT10); C2(Carbamidomethyl)	5.886e-07	58.32	0.000109319	2	1731.94	1.49544	0	1.37272	4	3.41823	1.01031	4	2.647	1.00881	4	19.6523	0.944455	4	2.60859	0.923587	4	3.57224	0.974808	4	3.47379	0.927699	4	18.6556	0.95514	4	9.40134	0.84471	4	23.7147
hSTIFENLANk	12	B4E1B2;Q53H26;C9JVG0	N-Term(TMT10); K11(TMT10)	4.997e-06	42.2	0.00631181	2	1731.98	1.25849	0
kVFASLPQVER	1	O75083;Q53GN4	N-Term(TMT10); K1(TMT10)	1.058e-06	29.73	0.0716168	3	1732.05	0.983165	1
rLEGQEEEEDNR	1	G5E968	N-Term(TMT10)	5.86e-05	28.44	0.0232014	3	1732.83	1.74781	1	0.816679	1		0.858997	1		0.977106	1		0.842186	1		0.655493	1		1.08476	1		1.34371	1		1.53143	1		1.00871	1
nHMQYEIVIk	64	P19827;B7Z539	N-Term(TMT10); K10(TMT10)	1.694e-07	63.65	3.6938e-05	2	1732.98	0.861408	0
gLWEQcQLLk	4	P04275;L8E853	N-Term(TMT10); C6(Carbamidomethyl); K10(TMT10)	2.053e-06	60.47	7.82558e-05	2	1732.98	0.360254	0
kLDGIcWQVR	3	P07360	N-Term(TMT10); K1(TMT10); C6(Carbamidomethyl)	0.002404	12.85	4.50059	3	1732.99	-0.674373	1	1.13567	3	1.55422	0.971463	3	7.23834	1.06323	3	6.10922	0.979132	3	14.6503	0.917391	3	9.92665	0.727106	3	1.33984	0.944073	3	5.98771	1.27541	3	9.63952	0.887019	3	2.02446
vGVETTkPSk	3	A0M8Q6	N-Term(TMT10); K7(TMT10); K10(TMT10)	0.0007919	21.46	0.364393	3	1733.08	0.858827	0	0.66553	3	3.78006	0.795212	3	3.23588	2.64293	3	3.39335	0.96229	3	5.51899	3.41218	3	0.98928	0.238146	3	23.4316	0.423212	3	0.156704	0.136695	3	38.6585	0.17366	2	25.7697
vcSQYAAYGEk	78	P02774	N-Term(TMT10); C2(Carbamidomethyl); K11(TMT10)	2.55e-07	68.52	7.07945e-06	2	1733.9	1.64742	0	1.09186	78	9.46765	0.935633	78	6.93955	0.99007	78	7.78695	1.00524	78	5.12822	0.872059	78	11.4852	0.987888	78	6.99672	1.17006	78	6.28944	1.00884	78	7.08468	1.04004	78	5.77625
gSSVIHcDADSk	34	B4E1D8;P04003	N-Term(TMT10); C7(Carbamidomethyl); K12(TMT10)	6.214e-09	71.41	3.41509e-06	2	1733.89	2.26472	0
tYHVGEQWQk	39	A0A024R462;B4DU16;B4DN21	N-Term(TMT10); K10(TMT10)	6.971e-05	50.29	0.000798369	2	1733.94	1.26277	0
emSGSPASGIPVk	21	P0C0L4;P0C0L5;A0A0G2JPR0	N-Term(TMT10); M2(Oxidation); K13(TMT10)	0.001035	55.22	0.00027205	2	1733.95	0.905375	0
yGLVTYATYPk	15	B4E1Z4	N-Term(TMT10); K11(TMT10)	2.446e-07	60.6	7.55561e-05	2	1734	5.55873	0	1.08817	15	5.60344	1.14736	15	3.65948	1.1194	15	4.81927	0.986283	15	3.3607	0.832999	15	9.25546	0.920967	15	5.52596	1.13776	15	2.91252	1.08496	15	10.6303	0.782276	15	10.1757
vkEEVFIQQR	8	P04275;L8E853	N-Term(TMT10); K2(TMT10)	1.17e-05	36.13	0.0209042	2	1734.03	1.93326	1
eFQLFSSPHGk	12	Q53H26;B4E1B2	N-Term(TMT10); K11(TMT10)	1.164e-06	56.64	0.000187832	2	1734.96	2.22731	0
mLLADQGQSWk	4	P09211	N-Term(TMT10); K11(TMT10)	1.182e-06	53.12	0.000427319	2	1734.97	4.4949	0	0.677048	4	18.2934	0.957005	4	1.44609	1.04788	4	12.396	1.07784	4	1.76435	0.997963	4	5.33458	1.13275	4	6.75958	0.98639	4	4.22184	1.05815	4	4.4152	1.11078	4	2.3771
lSSTWEGIQAGk	1	P37837	N-Term(TMT10); K12(TMT10)	1.081e-07	56.74	0.000191394	2	1734.98	-1.65502	0	0.548154	1		1.0681	1		1.03042	1		1.10572	1		0.892105	1		1.1788	1		1.01459	1		1.00446	1		1.22183	1
yAATSQVLLPSk	9	P01871;P0DOX6	N-Term(TMT10); K12(TMT10)	1.558e-07	70.52	6.71134e-06	2	1736.04	2.9826	0
aVAIDLPGLGHSk	1	B4DNR3	N-Term(TMT10); K13(TMT10)	3.748e-05	39.2	0.00807321	3	1736.05	3.66098	0	0.823397	1		0.852547	1		0.981572	1		1.02196	1		1.06278	1		1.07414	1		1.0729	1		0.956261	1		1.33036	1
yTTTMGVNTYk	12	Q53HT9	N-Term(TMT10); K11(TMT10)	2.871e-07	61.27	5.62076e-05	2	1736.93	-1.96	0	1.15288	12	4.5554	0.996908	12	6.57431	1.00318	12	9.52948	0.930215	12	6.56097	0.862232	12	7.73658	0.96231	12	9.43538	1.24335	12	4.20415	1.11908	12	6.36229	0.8093	12	8.30105
lQWLLDESFk	1	A0A0A7E7X3	N-Term(TMT10); K10(TMT10)	0.0007662	37.48	0.0138095	2	1736.99	-3.27906	0	0.750851	1		0.991371	1		0.955738	1		0.907119	1		0.963851	1		1.0269	1		1.17273	1		1.26747	1		1.08263	1
fVTAVGTQGAISk	1	E7EX60	N-Term(TMT10); K13(TMT10)	5.733e-10	75.88	1.91991e-06	2	1737.03	-0.480282	0	1.19505	1		1.03325	1		1.18816	1		1.03196	1		1.15132	1		0.83756	1		1.12421	1		0.793762	1		0.824275	1
gDEcQLcEVENR	7	O75882;B4DZ36	N-Term(TMT10); C4(Carbamidomethyl); C7(Carbamidomethyl)	1.939e-08	55.01	1.75103e-05	2	1737.77	0.80941	0
nFSDNQLQEGk	5	P37802	N-Term(TMT10); K11(TMT10)	2.875e-07	52.51	0.00152998	2	1737.92	1.43277	0	0.500957	5	23.9116	1.02986	5	8.86959	0.915313	5	10.7525	1.1027	5	5.1496	0.895178	5	4.16339	1.10305	5	5.51068	0.860247	5	5.43428	0.946518	5	4.29778	1.59144	5	7.66301
cDEWSVNSVGk	29	Q53H26;B4E1B2	N-Term(TMT10); C1(Carbamidomethyl); K11(TMT10)	2.735e-08	75.62	2.76077e-06	2	1738.88	0.545012	0
gIQVEIYSFPk	1	P19320	N-Term(TMT10); K11(TMT10)	0.004044	26	0.174576	3	1739.02	0.884999	0	1.58666	1		1.33227	1		0.453469	1		0.914216	1		1.13416	1		1.17213	1		1.04132	1		0.807226	1		0.517436	1
lALETALMYGAk	5	B2R6V9	N-Term(TMT10); K12(TMT10)	1.267e-09	68.26	1.02406e-05	2	1739.02	-0.389793	0	1.00618	5	0.258023	0.917616	5	2.5957	1.11952	5	6.72561	1.24064	5	3.64655	0.829798	5	3.67713	0.965892	5	4.46225	0.953227	5	5.84697	1.10846	5	2.85111	0.824428	5	1.59902
sWYLEDNINk	13	P12259	N-Term(TMT10); K10(TMT10)	0.0002595	44.57	0.0021507	3	1739.94	0.68288	0	1.12721	13	9.42057	0.925783	13	7.46283	1.01623	13	3.91068	0.942806	13	3.41904	0.941928	13	8.93708	0.974884	13	3.20976	1.18962	13	8.41659	1.02252	13	7.43927	1.02683	13	7.1037
fVYHLSDLck	2	P01591	N-Term(TMT10); C9(Carbamidomethyl); K10(TMT10)	0.001269	23.24	0.342403	3	1739.95	-1.81247	0	1.19292	2	2.28681	1.25707	2	2.90863	1.43399	2	7.45171	1.20634	2	6.08488	1.34172	2	1.22829	0.586803	2	5.1624	0.677889	2	5.70229	0.727367	2	34.9573	0.577693	2	10.3602
gVTFNVTTVDTk	5	A0A1U9X8Y4	N-Term(TMT10); K12(TMT10)	3.963e-09	73.62	3.33052e-06	2	1740	1.54748	0	0.646757	5	12.2145	1.05178	5	6.30205	0.943083	5	5.87878	1.10115	5	3.64015	0.974571	5	6.38756	1.10771	5	8.52597	0.946781	5	3.57985	1.07833	5	1.91191	1.25018	5	13.4427
kMEILHPGk	10	P13671;A8K8Z4	N-Term(TMT10); K1(TMT10); K9(TMT10)	0.0004756	31.46	0.0287228	2	1740.08	1.0597	1
vPQVSTPTLVEVSR	13	P02768;F6KPG5	N-Term(TMT10)	2.757e-06	71.29	1.14313e-05	2	1741.01	0.702069	0
lVNGQSHISLSk	1	P0C0L4;P0C0L5;B7Z1F8;A0A0G2JPR0	N-Term(TMT10); K12(TMT10)	3.414e-07	54.96	0.000442347	2	1741.04	-0.564502	0
kGEWVALNPLR	11	P08603;A8K5T0	N-Term(TMT10); K1(TMT10)	2.625e-05	29.58	0.051552	2	1741.06	1.94738	1
vYIASSSGSTAIk	2	O75368	N-Term(TMT10); K13(TMT10)	6.414e-08	49.21	0.000803665	2	1742.01	2.58819	0	0.615958	2	4.45308	1.05108	2	0.197989	1.02122	2	14.7034	1.1163	2	3.60265	0.914507	2	1.77478	1.10417	2	16.6419	1.00591	2	19.573	0.904831	2	3.09244	1.35726	2	2.34299
tVAGQDAVIVLLGTR	2	M0R192	N-Term(TMT10)	9.358e-10	67.73	9.77357e-06	2	1742.04	4.32605	0	1.02157	2	2.32793	1.04545	2	1.42855	1.32964	2	5.48253	1.05808	2	1.8413	0.881821	2	5.80045	0.85205	2	1.6292	0.993734	2	4.6214	1.08978	2	10.8577	0.810154	2	5.35424
vTVLFAGQHIAk	2	P21333	N-Term(TMT10); K12(TMT10)	1.841e-08	61.46	2.90086e-05	2	1742.08	1.73358	0	0.4064	2	20.6834	1.09387	2	4.23297	1.58547	2	5.3279	0.865771	2	1.67294	0.619214	2	1.98493	1.29772	2	4.67829	0.904658	2	5.7373	0.611008	2	1.93198	2.07853	2	4.18852
kHVAEAIck	9	C0JYY2;Q7Z7Q0	N-Term(TMT10); K1(TMT10); C8(Carbamidomethyl); K9(TMT10)	1.972e-05	36.96	0.0120723	3	1743.06	1.35575	1
lASVPGSQTVVVk	1	Q96N83	N-Term(TMT10); K13(TMT10)	0.0008695	34.72	0.0167969	2	1743.07	-2.4125	0	0.977134	1		0.908292	1		0.996938	1		1.00216	1		1.00648	1		0.981548	1		1.23497	1		1.10807	1		0.901695	1
kLVIIEGDLER	4	J3KN67;A0A0S2Z4G4;A0A0S2Z4I4	N-Term(TMT10); K1(TMT10)	0.0002049	24.73	0.15816	3	1743.08	0.340299	1
kAAISGENAGLVR	7	P19827;B7Z539	N-Term(TMT10); K1(TMT10)	2.931e-08	54.89	0.000209523	3	1744.05	0.0210004	1
vGSALFLSHNLk	1	B2R815	N-Term(TMT10); K12(TMT10)	4.398e-05	35.16	0.0227525	4	1744.05	0.519475	0	1.2992	1		1.05204	1		0.9827	1		0.931166	1		0.86655	1		1.11981	1		1.07319	1		0.816608	1		1.03003	1
ykPTPIPIk	1	Q14126	N-Term(TMT10); K2(TMT10); K9(TMT10)	0.001402	10.1	2.27208	3	1744.13	-0.152007	0	1.1301	1		0.886951	1		1.04538	1		1.05091	1		0.861242	1		1.0361	1		1.14333	1		1.00097	1		0.959028	1
iWHHTFYNELR	2	P60709;P63261;A8K3K1;P0CG39	N-Term(TMT10)	0.001261	24.88	0.339716	2	1744.91	0.229172	0
eSLSSYWESAk	27	K7ER74	N-Term(TMT10); K11(TMT10)	1.263e-08	71.17	8.3831e-06	2	1744.92	0.975844	0	0.85282	27	10.8911	0.757038	27	9.57715	0.680024	27	19.9111	1.92826	27	11.6032	0.899746	27	7.02569	1.19657	27	6.30488	0.601326	27	18.8664	0.76447	27	4.34393	0.903862	27	8.07026
rHEDTLTLFPMR	2	P12259	N-Term(TMT10)	0.00159	19.19	1.39603	4	1744.93	-0.977727	1	1.1135	2	12.9619	0.998697	2	17.7489	1.12696	2	8.55051	1.18611	2	5.033	1.07441	2	4.8934	0.844395	2	4.0988	0.919777	2	13.2124	0.823245	2	12.4967	0.962245	2	5.14426
rPSEIVIGQck	46	P04196;B2R8I2	N-Term(TMT10); C10(Carbamidomethyl); K11(TMT10)	2.743e-05	39.25	0.00882463	3	1745.02	3.27587	0
nTLELSNGVIVk	13	C0JYY2	N-Term(TMT10); K12(TMT10)	3.76e-09	73.47	2.60198e-06	2	1745.06	1.43075	0	1.24784	13	9.53592	0.927934	13	7.9488	0.920473	13	10.4507	1.03495	13	4.7595	1.09864	13	7.39288	1.0776	13	7.37602	0.907195	13	7.51435	0.982237	13	6.6988	0.780985	13	9.98138
wNNYMMDWk	2	A0A024CIM4	N-Term(TMT10); K9(TMT10)	2.035e-05	42.1	0.0015569	2	1745.86	4.10947	0	1.2007	2	3.13384	0.997075	2	3.31832	1.06736	2	0.277844	0.859073	2	2.23833	0.811968	2	1.25264	0.952517	2	1.33829	1.20428	2	3.35534	1.69259	2	1.16166	0.156152	1
wLVGEMHcQk	12	P10643;B2R6W1	N-Term(TMT10); C8(Carbamidomethyl); K10(TMT10)	1.164e-06	46.49	0.00123974	2	1745.93	1.78577	0
fSGSGAGTDFTLk	2	A0A075B6R9	N-Term(TMT10); K13(TMT10)	3.355e-06	50.58	0.000653613	3	1745.95	1.11728	0	1.2765	2	3.91823	1.38009	2	8.36035	1.96085	2	17.6856	0.892251	2	1.54798	2.56875	2	14.3805	0.294195	2	86.303	0.431841	2	22.3783	0.19219	2	119.666	0.402009	1
qLYVLGHEAMk	1	Q5JRR9	N-Term(TMT10); K11(TMT10)	0.0005322	27.69	0.13379	3	1747	0.512332	0	0.707879	1		0.969865	1		1.05172	1		1.01919	1		1.21871	1		1.06909	1		0.898558	1		1.06782	1		1.0742	1
aGEVINQPMMMAAR	1	A0A024QZN4;B4E3Q9	N-Term(TMT10)	0.0003019	17.49	0.828806	2	1747.9	7.30576	0
aEGAATEEEGTPk	2	P80723	N-Term(TMT10); K13(TMT10)	6.762e-05	47.78	0.000916986	2	1747.92	2.11877	0	0.679794	2	1.07207	0.848415	2	0.84365	0.613769	2	9.04532	0.754463	2	6.82817	1.06564	2	10.7015	1.25231	2	7.39957	1.28674	2	12.8156	1.41458	2	0.402175	1.20623	2	1.22744
vTSVVTGFNNLPDR	1	Q9NY97	N-Term(TMT10)	0.0001182	24.53	0.291763	3	1747.95	-0.00493166	0	1.12767	1		0.883855	1		1.07899	1		1.05877	1		0.924133	1		1.03729	1		1.03958	1		1.01198	1		0.92746	1
aIAVTVQEMVTk	5	Q9Y490	N-Term(TMT10); K12(TMT10)	5.94e-08	68.12	1.36672e-05	2	1748.04	0.737765	0	0.547515	5	4.9619	1.07414	5	9.30203	1.67574	5	28.9647	0.995901	5	5.38586	1.39337	5	34.6246	0.817769	5	35.802	0.732719	5	34.1384	0.88211	5	20.1135	1.01155	5	29.2508
aLYLQYTDETFR	101	P00450;D6RE86	N-Term(TMT10)	3.901e-07	57.79	0.000731902	2	1748.91	1.24719	0
nHmQYEIVIk	16	P19827;B7Z539	N-Term(TMT10); M3(Oxidation); K10(TMT10)	0.00147	44.96	0.00232823	2	1748.98	1.03893	0
yGGQPVPNFPSk	5	P21333	N-Term(TMT10); K12(TMT10)	2.157e-05	52.93	0.000374613	2	1748.97	-1.3644	0	0.537624	5	51.5767	1.00532	5	1.6654	1.48625	5	14.3731	0.954343	5	7.76684	0.69311	5	11.6816	1.25103	5	14.6521	0.823347	5	8.02162	0.715575	5	19.9523	1.73146	5	17.0253
dIAPTLTLYVGk	18	P00739;P00738	N-Term(TMT10); K12(TMT10)	8.889e-09	70.73	5.52812e-06	2	1749.06	0.643401	0
kAETGDTVLk	1	P19320	N-Term(TMT10); K1(TMT10); K10(TMT10)	0.003636	16.44	1.32333	3	1749.07	0.0564232	1	1.24944	1		0.885017	1		1.07896	1		0.917424	1		1.13029	1		0.867405	1		1.32787	1		0.853334	1		0.968717	1
gATYNIIVEALk	34	A0A024R462;B4DU16;B4DN21	N-Term(TMT10); K12(TMT10)	7.93e-09	95.49	2.13985e-08	2	1750.06	2.17145	0
wcHDNGVNYk	7	A0A024R462;B4DU16;B4DN21	N-Term(TMT10); C2(Carbamidomethyl); K10(TMT10)	6.074e-07	60.12	3.3803e-05	2	1750.87	0.420291	0
mTVTDQVNcPk	12	P05090	N-Term(TMT10); C9(Carbamidomethyl); K11(TMT10)	1.618e-07	64.28	2.47838e-05	2	1750.93	3.14075	0	1.02234	12	15.7735	0.806517	12	11.2547	0.864737	12	11.0648	1.0352	12	15.6457	1.13248	12	20.7429	0.814125	12	12.9902	0.997471	12	13.9348	0.757551	12	8.10623	1.60175	12	64.1815
dLQFVEVTDVk	86	A0A024R462	N-Term(TMT10); K11(TMT10)	1.303e-07	70.55	7.70918e-06	2	1751	1.18961	0	1.17799	86	6.58863	0.829353	86	6.31683	0.98507	86	5.77073	0.919957	86	5.13303	1.03669	86	6.13441	1.03885	86	5.07034	1.32532	86	7.50522	1.06173	86	3.84769	0.765177	86	8.93032
lAILGIHNEVSk	4	P12814	N-Term(TMT10); K12(TMT10)	3.216e-08	69.85	4.70472e-06	2	1752.08	1.94021	0	0.647823	4	14.0536	1.00386	4	11.3742	1.17591	4	21.7316	1.06368	4	2.61063	1.05531	4	12.0846	1.06344	4	5.81221	0.897723	4	14.9869	0.930813	4	8.11647	1.27302	4	13.0146
yTTTmGVNTYk	8	Q53HT9	N-Term(TMT10); M5(Oxidation); K11(TMT10)	0.0002315	46.9	0.00127507	2	1752.93	1.16766	0	1.00983	8	10.2206	0.85785	8	2.73745	0.967091	8	11.0963	0.805746	8	10.8462	0.735918	8	17.7188	0.921752	8	6.38778	1.17784	8	5.95657	0.941846	8	8.06783	1.52553	8	43.5277
yYSFFDLDPk	2	Q86UX7	N-Term(TMT10); K10(TMT10)	0.0002879	23.98	0.253765	2	1752.93	1.62966	0	0.575743	2	11.4831	1.13191	2	3.30532	1.01019	2	7.09225	1.11381	2	1.70124	0.825334	2	1.21043	1.18731	2	3.31367	1.06047	2	3.87939	1.21007	2	2.12209	0.824909	2	1.51249
rPASPISTIQPk	10	P07360	N-Term(TMT10); K12(TMT10)	3.517e-06	29.11	0.0686752	3	1753.07	-1.24295	0	1.13362	10	4.17358	0.943825	10	12.2341	0.995097	10	10.343	0.934644	10	7.95458	0.827371	10	6.93197	0.828916	10	9.02973	1.0895	10	7.1054	1.16247	10	10.7019	1.22097	10	6.63935
gVNVcQETcTk	20	P03952	N-Term(TMT10); C5(Carbamidomethyl); C9(Carbamidomethyl); K11(TMT10)	3.531e-08	68.65	2.43578e-05	2	1753.9	1.45553	0	1.13034	20	8.98309	0.987738	20	5.15125	0.908862	20	9.96294	1.05358	20	3.36256	0.998165	20	6.64211	0.945447	20	8.00658	0.935857	20	7.70483	0.970265	20	5.62939	1.11728	20	8.07416
vSEGNHDIALIk	17	P03952	N-Term(TMT10); K12(TMT10)	1.028e-08	69.04	8.43231e-06	2	1754.03	2.14177	0	1.06802	17	5.48051	1.03909	17	5.98887	1.01345	17	11.6261	1.09875	17	4.84349	1.02885	17	9.17227	0.918291	17	10.0864	0.934024	17	4.38371	0.839855	17	25.0702	1.02014	17	8.60303
kELSSFIDk	17	P02774	N-Term(TMT10); K1(TMT10); K9(TMT10)	2.136e-05	44.34	0.00171364	2	1754.07	0.598222	1	1.09558	17	4.9537	0.965066	17	7.30902	0.982227	17	3.66718	1.00253	17	2.07064	0.862765	17	6.89405	1.00168	17	6.96266	1.15823	17	2.27255	1.01655	17	6.06008	1.0343	17	7.92416
lDETDDPDDYGDR	2	A0A024R5A3	N-Term(TMT10)	0.00159	44.7	0.000150786	2	1754.76	2.317	0	0.476148	2	6.86966	1.26331	2	5.70661	0.634028	2	30.1012	1.1264	2	4.50571	0.932801	2	18.1776	1.04513	2	12.4064	1.087	2	3.42422	1.18094	2	1.51965	1.16458	2	3.9935
tMFIGGSQLSQk	1	P80108	N-Term(TMT10); K12(TMT10)	2.376e-07	34.92	0.0242224	2	1754.99	-0.266187	0	1.14553	1		0.840731	1		0.890137	1		1.08914	1		0.782944	1		0.929117	1		1.04937	1		1.31983	1		0.93918	1
vDIVYGNWNGPHR	1	A0A0C4DFP6	N-Term(TMT10)	5.626e-06	39.02	0.00885344	3	1755.91	1.18334	0	1.17918	1		0.95706	1		1.0856	1		0.939167	1		1.05545	1		1.10991	1		1.01055	1		0.919647	1		0.886421	1
kEFMSQGNk	3	Q53HT9	N-Term(TMT10); K1(TMT10); K9(TMT10)	0.0004686	33.55	0.0775839	2	1756.01	1.94192	1	1.2226	3	1.16201	0.963962	3	11.0501	0.924118	3	13.7435	0.941307	3	4.6588	0.861771	3	1.49549	0.976099	3	9.41077	1.22257	3	3.63666	1.11087	3	2.06977	0.898344	3	2.54603
sLEDLQLTHNk	40	P51884	N-Term(TMT10); K11(TMT10)	1.407e-07	67.97	2.77683e-05	2	1756	2.13824	0	1.05768	40	6.7145	1.01561	40	5.34403	0.915675	40	6.34007	0.945359	40	4.58512	0.954582	40	8.07604	1.05	40	5.78313	1.16344	40	8.78478	1.01422	40	8.89415	1.04162	40	10.3719
dPTFIPAPIQAk	42	Q53GY3	N-Term(TMT10); K12(TMT10)	0.0001341	62.09	9.87281e-05	2	1756.04	0.247223	0	1.13281	42	7.13432	0.861453	42	7.36303	0.935893	41	9.94055	1.02099	42	5.0521	0.836253	42	6.87602	0.922494	42	6.9482	1.1823	42	5.4499	1.05662	42	5.92176	1.21055	42	7.0182
lAAVDATVNQVLASR	2	Q15084	N-Term(TMT10)	1.467e-07	61.72	4.7714e-05	2	1757.01	0.663525	0	0.600602	2	41.5056	0.906953	2	5.23134	1.04271	2	8.61513	1.15176	2	0.0825813	0.868283	2	12.8958	1.11401	2	13.306	0.971848	2	12.7394	1.09035	2	5.84454	1.24776	2	26.5921
kLVILEGELER	12	P67936;V9HW25;K7ENT6	N-Term(TMT10); K1(TMT10)	3.804e-07	53.35	0.000249686	2	1757.09	-1.85739	1
fPVEMTHNHNFR	19	P05546	N-Term(TMT10)	8.864e-08	79.63	4.04538e-07	3	1757.87	0.0924816	0	0.978608	19	14.7499	1.0199	19	9.86045	1.09442	18	10.1231	0.99283	19	12.842	0.959994	18	8.34209	0.978348	19	9.69933	1.1682	19	16.7453	1.01874	19	11.3531	0.986659	18	13.5291
nTAEWLLSHTk	4	P00491	N-Term(TMT10); K11(TMT10)	2.044e-05	26.48	0.178013	3	1757.99	-1.3859	0	0.859976	4	12.6826	1.06089	4	5.14001	0.953164	4	11.7631	1.00904	4	4.98797	0.900293	4	4.27947	0.983033	4	3.58408	0.997163	4	2.13061	1.0853	4	7.93781	1.12596	4	13.4565
dPVQLNLLYVQAR	3	Q9Y4G6;Q9Y490	N-Term(TMT10)	5.884e-07	44.62	0.0025696	3	1758.01	0.908526	0
eAEEHQETQcLR	2	Q99969	N-Term(TMT10); C10(Carbamidomethyl)	2.63e-05	37.93	0.00234349	3	1758.83	1.09152	0	1.12021	2	31.4145	1.06688	2	7.30367	1.09913	2	5.96246	0.864925	2	10.5562	1.04555	2	81.8488	0.856924	2	12.9652	0.946656	2	9.79878	0.888043	2	22.6289	1.17639	2	2.98269
eDFTSLSLVLYSR	91	P02774;D6RF20	N-Term(TMT10)	9.081e-10	69.78	6.48534e-06	2	1758.95	1.92844	0
fSIEGSYQLEk	13	P05154	N-Term(TMT10); K11(TMT10)	7.929e-09	72.16	4.10491e-06	2	1758.97	2.82018	0	1.11293	13	7.63438	1.12154	13	8.7159	1.12309	13	5.47836	0.423354	13	24.11	0.973748	13	5.38817	1.05813	13	4.5822	1.33439	13	5.85851	1.17299	13	8.07977	1.15588	13	6.15165
vPTANVSVVDLTcR	5	P04406	N-Term(TMT10); C13(Carbamidomethyl)	4.002e-08	58.31	0.000124402	2	1759.97	5.40308	0	0.911551	5	12.7334	1.01775	5	7.46568	1.21688	5	26.9449	1.05934	5	2.82149	1.37439	5	8.48882	1.00798	5	5.71256	0.964377	5	11.887	0.968869	5	11.8909	0.819056	5	24.3645
lPPTTTcQQQk	126	B4E1Z4;H7C5H1	N-Term(TMT10); C7(Carbamidomethyl); K11(TMT10)	1.851e-05	66.66	1.91176e-05	2	1759.98	3.25386	0
cSTSSLLEAcTFR	19	Q53H26;B4E1B2	N-Term(TMT10); C1(Carbamidomethyl); C10(Carbamidomethyl)	2.621e-07	77.52	3.62872e-07	3	1760.85	0.620494	0
lcNNPAPQFGGk	2	A0A024R9Q1	N-Term(TMT10); C2(Carbamidomethyl); K12(TMT10)	6.62e-05	36.76	0.0146971	2	1760.95	0.815109	0	0.759336	2	16.0733	0.467345	2	65.2	0.795956	2	21.6157	0.754172	2	14.0036	0.89906	2	3.54758	1.32336	2	16.3457	0.651154	2	33.2656	2.29381	2	29.6533	0.707497	2	21.2236
sLDLDSIIAEVk	16	H6VRF8	N-Term(TMT10); K12(TMT10)	1.442e-08	72.5	3.99262e-06	2	1761.05	2.63854	0	0.909922	16	5.25801	0.981385	16	3.77425	0.981494	16	5.95722	0.852006	16	6.39046	0.776764	16	8.4884	1.29993	16	5.40608	1.2688	16	5.35373	1.13237	16	4.63665	0.930141	16	5.49459
aGTLDLSLTVQGk	2	P07996;A0A024R9Q1	N-Term(TMT10); K13(TMT10)	0.0006339	26.51	0.160035	3	1761.05	-0.488087	0
kcDLISIPk	1	B4DMH3	N-Term(TMT10); K1(TMT10); C2(Carbamidomethyl); K9(TMT10)	0.0003043	12.64	3.21801	3	1761.09	-0.329895	1	0.533055	1		0.966243	1		0.912142	1		0.986669	1		1.11853	1		1.1495	1		0.904651	1		1.09537	1		1.44539	1
wLVGEmHcQk	5	P10643;B2R6W1	N-Term(TMT10); M6(Oxidation); C8(Carbamidomethyl); K10(TMT10)	9.203e-05	36.3	0.0140771	3	1761.92	0.698883	0
fSGSGSGTDFTLk	14	A2NB45;A0A075B6S2;A0A1W6IYL0	N-Term(TMT10); K13(TMT10)	1.843e-08	76.43	1.34117e-06	2	1761.94	0.920588	0
gQYcYELDEk	59	P04004	N-Term(TMT10); C4(Carbamidomethyl); K10(TMT10)	1.153e-06	59.57	3.27359e-05	2	1762.87	0.277367	0	1.07512	59	10.1059	0.960488	59	6.52451	0.882255	59	8.01869	0.993186	59	4.7186	0.857675	59	10.1519	0.979616	59	6.2735	1.07076	59	7.58626	1.11157	59	8.62433	1.12421	59	7.35961
aEAGVPAEFSIWTR	3	P21333	N-Term(TMT10)	0.0002101	41.4	0.00615771	2	1762.94	3.3415	0	0.361897	3	56.1345	1.07991	3	3.62341	1.72128	3	7.90333	0.916476	3	13.7629	0.458361	3	7.8511	1.29334	3	7.82924	0.748801	3	0.985739	0.624885	3	10.84	2.25342	3	2.37175
cNEIINWLDk	1	P11142	N-Term(TMT10); C1(Carbamidomethyl); K10(TMT10)	1.997e-06	53.14	0.00046612	2	1762.96	3.02114	0	0.459395	1		1.02428	1		0.978028	1		1.12178	1		0.825587	1		1.28906	1		0.91686	1		0.92999	1		1.54504	1
kGNVATEISTER	28	C0JYY2;Q7Z7Q0	N-Term(TMT10); K1(TMT10)	2.756e-05	46.12	0.0019523	2	1763.01	-0.0692654	1
fLIPNASQAESk	9	P63104	N-Term(TMT10); K12(TMT10)	3.953e-06	79.23	9.45639e-07	2	1763.02	2.70503	0	0.515732	9	22.6104	1.03172	9	2.4261	1.13604	9	12.2925	1.15917	9	12.0822	1.02935	9	17.6892	1.06786	9	11.1327	0.854246	9	6.54708	0.975632	9	11.6119	1.18483	9	21.9249
hIVTFDGQNFk	4	P04275;L8E853	N-Term(TMT10); K11(TMT10)	7.595e-07	65.99	2.12618e-05	2	1763.99	1.53341	0
eFEPLLNWMk	2	Q5CAQ5	N-Term(TMT10); K10(TMT10)	5.664e-05	45.7	0.0020348	2	1764.98	-0.458955	0	0.875363	2	0.039248	0.963916	2	6.90254	1.01208	2	14.1124	0.969025	2	9.3089	0.790556	2	13.6591	1.17005	2	10.6479	1.02084	2	18.1049	1.11709	2	3.72856	1.16433	2	0.786609
akDQLTcNk	4	P01024	N-Term(TMT10); K2(TMT10); C7(Carbamidomethyl); K9(TMT10)	0.002009	10.95	5.64879	3	1765.03	4.39678	1	1.09402	4	6.87019	1.01392	4	1.91034	1.086	4	3.43648	1.01208	4	7.80423	0.955643	4	4.62292	0.859842	4	15.9209	1.00039	4	1.33598	1.00792	4	4.50115	1.05872	4	5.6917
eFQVPTFTIPk	8	C0JYY2	N-Term(TMT10); K11(TMT10)	0.001215	52.25	0.000412496	2	1765.03	0.341041	0	1.11232	8	9.38088	0.8503	8	11.7209	0.964014	8	7.17794	1.1691	8	4.05315	0.924819	8	13.1139	1.08461	8	8.67505	1.08311	8	5.08177	1.03932	8	3.72458	0.818354	8	3.01074
sWFEPLVEDMQR	19	P02649;A0A0S2Z3V0	N-Term(TMT10)	9.599e-06	53.91	0.000151807	3	1765.89	3.90208	0
nVAFVIDISGSMAGR	9	Q06033	N-Term(TMT10)	1.682e-06	64.31	2.74118e-05	2	1765.96	9.55819	0	1.04984	9	8.82484	0.976654	9	3.14002	1.13616	9	7.09892	1.06675	9	3.36637	0.906644	9	6.54245	0.920521	9	5.57771	1.22144	9	9.77952	1.11541	9	8.87323	0.77476	9	6.94066
aEAQAQYSAAVAk	186	B2RMS9;B7ZKJ8;B7Z544	N-Term(TMT10); K13(TMT10)	1.084e-10	101.89	5.41011e-09	2	1765.99	1.44342	0
tPAYYPNAGLIk	2	Q1HP67	N-Term(TMT10); K12(TMT10)	5.991e-05	54.55	0.00027306	2	1766.03	0.346091	0	0.48082	2	29.1936	0.481082	2	35.835	1.71872	2	13.9818	1.529	2	15.8006	0.676075	2	20.1742	1.04993	2	4.39257	1.07794	2	2.70668	0.585811	2	14.7577	1.58848	2	6.86652
kLIASMSSDSLR	2	B2R6V9	N-Term(TMT10); K1(TMT10)	0.0001393	40.14	0.00753804	2	1766.03	0.697161	1	0.996298	2	17.3608	1.14345	2	2.5732	1.06401	2	4.78648	1.17334	2	7.386	0.8703	2	20.8675	0.852908	2	12.7428	0.867553	2	1.51577	1.07756	2	0.943871	0.888295	2	20.718
qGFGNVATNTDGk	34	P02675	N-Term(TMT10); K13(TMT10)	4.573e-09	77.88	1.04112e-06	2	1766.94	-3.46681	0	1.24201	34	8.16655	0.981428	34	5.25693	1.32161	34	8.62789	0.935794	34	7.62729	1.24205	34	6.33808	0.735051	34	12.7864	1.13945	34	6.23879	0.818402	34	5.89424	0.817249	34	12.1857
gFEPTLEALFGk	17	C0JYY2;Q7Z7Q0	N-Term(TMT10); K12(TMT10)	1.444e-09	71.22	5.93502e-06	2	1767.01	0.66799	0
dDLYVSDAFHk	64	P01008	N-Term(TMT10); K11(TMT10)	5.586e-08	76.7	1.30736e-06	2	1767.94	1.99953	0	1.10047	64	8.18254	0.977287	64	5.24299	0.987237	64	8.0597	1.05839	64	4.68417	0.909674	64	10.2088	1.04026	64	6.16539	1.22198	64	5.72753	0.692714	64	20.7343	1.1799	64	10.4971
[truncated: 5,951 more rows]
